# Supplementary material
Source: PubMed Central journal article supplement (PMC3832199)
Supplement: NIHMS251755-supplement-Supp_Fig_3.pdf [file NIHMS251755-supplement-Supp_Fig_3.pdf]

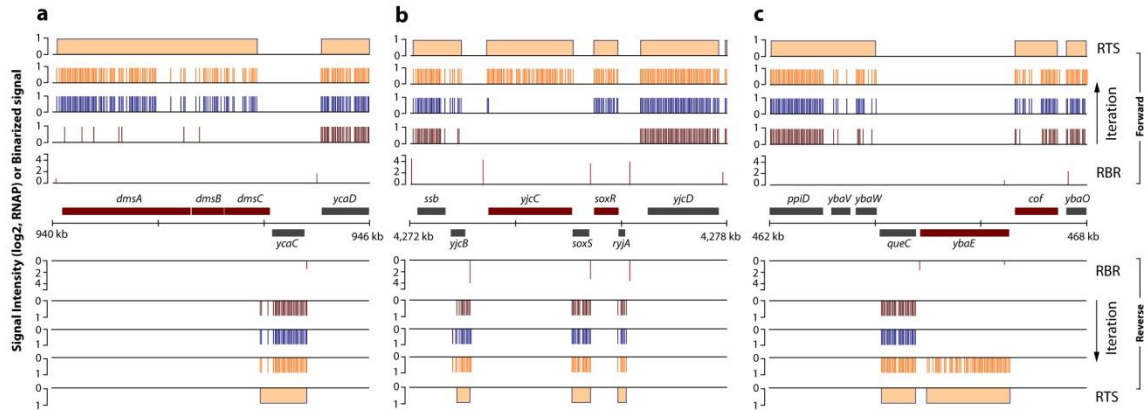

**Supplementary Figure 3 | Increase of genomic coverage and accuracy by iterative integration.** Iterative integration of transcripts, derived from various growth conditions, with RNA polymerase binding regions (RBRs) resulted in increased genomic coverage and accuracy (**a**, **b**, **c**), genes of interest are highlighted in red. Iteration of data from various growth conditions (log phase, red; heat-shocked, blue; stationary phase, orange) also allowed for determination of condition-specific transcripts, such as *yjcC* (**b**) and *ybaE* (**c**) from stationary growth phase, and *soxR* (**b**) from heat-shocked cells.
