# Supplementary material
Source: PubMed Central journal article supplement (PMC3832199)
Supplement: NIHMS251755-supplement-Supp_Fig_8.pdf [file NIHMS251755-supplement-Supp_Fig_8.pdf]

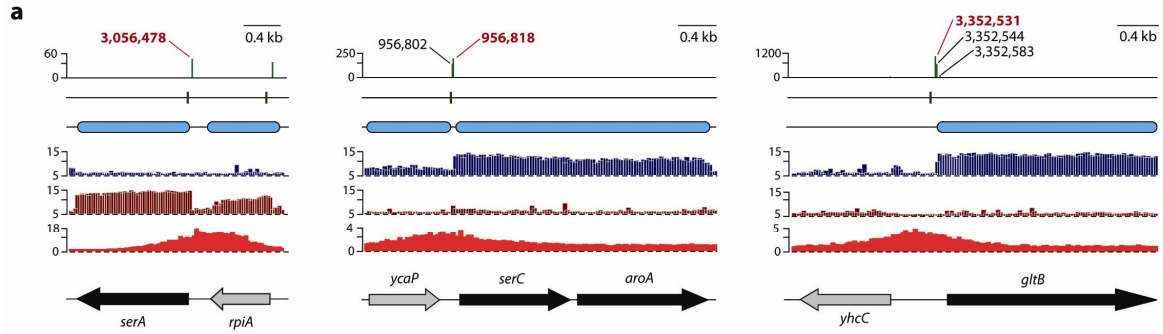

**b**

| TU                | Strand | Known TSS | Detection | Reads | Regulation | Lrp ChIP-chip |
|-------------------|--------|-----------|-----------|-------|------------|---------------|
| <i>ilvIH</i>      | +      | 85,394    |           | 0     |            |               |
| <i>ilvIH</i>      | +      | 85,420    |           | 0     |            |               |
| <i>ilvIH</i>      | +      | 85,534    |           | 0     |            |               |
| <i>ilvIH</i>      | +      | 85,597    | 85,597    | 10    | +          | 2.167         |
| <i>serC-aroA</i>  | +      |           | 956,802   | 170   |            |               |
| <i>serC-aroA</i>  | +      | 956,818   | 956,818   | 235   | +          | 1.348         |
| <i>dadAX</i>      | +      | 1,236,732 | 1,236,732 | 4     | -          | 2.628         |
| <i>dadAX</i>      | +      | 1,236,748 | 1,236,748 | 76    | -          | 2.628         |
| <i>dadAX</i>      | +      | 1,236,761 | 1,236,761 | 11    | -          | 2.628         |
| <i>stpA</i>       | -      |           | 2,796,550 | 230   |            |               |
| <i>stpA</i>       | -      | 2,796,558 | 2,796,558 | 315   | +          | 4.504         |
| <i>stpA</i>       | -      | 2,796,578 | 2,796,578 | 37    |            |               |
| <i>stpA</i>       | -      | 2,796,600 | 2,796,600 | 6     |            |               |
| <i>gcvTHP</i>     | -      |           | 3,048,789 | 62    |            |               |
| <i>gcvTHP</i>     | -      | 3,048,794 | 3,048,794 | 283   | +          | 3.495         |
| <i>serA</i>       | -      | 3,056,478 | 3,056,478 | 57    | +          | 3.511         |
| <i>serA</i>       | -      | 3,056,571 |           | 0     | -          | 3.511         |
| <i>gltBDF</i>     | +      | 3,352,531 | 3,352,531 | 1,100 | +          | 1.838         |
| <i>gltBDF</i>     | +      |           | 3,352,544 | 700   |            |               |
| <i>gltBDF</i>     | +      |           | 3,352,583 | 87    |            |               |
| <i>livKHMGF</i>   | -      |           | 3,595,627 | 181   |            |               |
| <i>livKHMGF</i>   | -      |           | 3,595,638 | 1,051 |            |               |
| <i>livKHMGF</i>   | -      | 3,595,753 | 3,595,753 | 1,230 |            |               |
| <i>livKHMGF</i>   | -      | 3,595,778 | 3,595,778 | 214   | -          | 3.396         |
| <i>ilvL</i>       | +      | 3,948,241 | 3,948,241 | 5     |            |               |
| <i>ilvL</i>       | +      | 3,948,313 | 3,948,313 | 1,007 | +          | 1.710         |
| <i>lysU</i>       | -      | 4,352,820 | 4,352,820 | 160   |            |               |
| <i>lysU</i>       | -      | 4,352,828 |           | 0     | -          | 4.419         |
| <i>fimAICDFGH</i> | +      | 4,540,717 |           | 0     | +          | 3.376         |
| <i>fimAICDFGH</i> | +      |           | 4,541,107 | 23    |            |               |
| <i>osmY</i>       | +      | 4,609,176 | 4,609,176 | 215   | -          | 2.797         |
| <i>osmY</i>       | +      |           | 4,609,257 | 1,213 |            |               |
| <i>osmY</i>       | +      |           | 4,609,269 | 223   |            |               |
| <i>osmY</i>       | +      |           | 4,609,356 | 708   |            |               |
| <i>osmY</i>       | +      |           | 4,609,391 | 172   |            |               |
| <i>livJ</i>       | -      |           | 3,597,715 | 103   |            |               |
| <i>livJ</i>       | -      | 3,597,785 | 3,597,785 | 724   | -          | 3.635         |

**Supplementary Figure 8 | Use of alternative TSSs.** (a) The *serA* gene, *serC-aroA* operon, and *gltBDF* operon have multiple experimentally verified TSSs. We detected the dominant TSS (3,056,478) for the *serA* promoter, which is highly activated by the transcription factor Lrp. Another experimentally confirmed TSS (3,056,571) is likely to be utilized less under this growth condition. The transcription factor Lrp also activates one experimentally verified TSS (956,818) of the *serC* promoter, which was detected as a

dominant TSS in this study. In addition, we found another TSS (956,802) at the *serC* promoter. The other previously confirmed TSS (3,352,531) at the *glbB* promoter was detected as a dominant TSS with Lrp-binding signal. **(b)** List of TSSs regulated by the transcription factor Lrp. We observed the alternative TSSs at the various promoter regions regulated by Lrp.
