# Supplementary material
Source: PubMed Central journal article supplement (PMC3832199)
Supplement: NIHMS251755-supplement-Supplement_Table2.pdf [file NIHMS251755-supplement-Supplement_Table2.pdf]

**Supplementary Table 2: Iterative analysis of expression profiles.** "Total probes" indicates total number of probes within ORF region. "Expressed probes" was determined by transcriptiondetector algorithm. "Probe density (%)" shows the ratio between the expressed probe and total probes within ORF region. Abbreviations: R1, log phase; R2, log phase+heat-shocked condition; R3, log phase+heat-shocked condition+stationary phase; R4, log phase+heat-shocked condition+stationary phase+glutamine growth condition; P, presence; A, absence; U, uncharacterized gene.

| bnum    | Gene   | start | end   | direction | size | total probes | Expressed probes |     |     |     | Probe density (%) |      |      |      | presence/absence call |    |    |    | Note |
|---------|--------|-------|-------|-----------|------|--------------|------------------|-----|-----|-----|-------------------|------|------|------|-----------------------|----|----|----|------|
|         |        |       |       |           |      |              | R1               | R2  | R3  | R4  | R1                | R2   | R3   | R4   | R1                    | R2 | R3 | R4 |      |
| b0001   | thrL   | 190   | 255   | +         | 65   | 3            | 3                | 3   | 3   | 3   | 100%              | 100% | 100% | 100% | P                     | P  | P  | P  |      |
| b0002   | thrA   | 337   | 2799  | +         | 2462 | 98           | 98               | 98  | 98  | 98  | 100%              | 100% | 100% | 100% | P                     | P  | P  | P  |      |
| b0003   | thrB   | 2801  | 3733  | +         | 932  | 37           | 37               | 37  | 37  | 37  | 100%              | 100% | 100% | 100% | P                     | P  | P  | P  |      |
| b0004   | thrC   | 3734  | 5020  | +         | 1286 | 51           | 51               | 51  | 51  | 51  | 100%              | 100% | 100% | 100% | P                     | P  | P  | P  |      |
| b0005   | yaaX   | 5234  | 5530  | +         | 296  | 12           | 12               | 12  | 12  | 12  | 100%              | 100% | 100% | 100% | P                     | P  | P  | P  | U    |
| b0008   | talB   | 8238  | 9191  | +         | 953  | 38           | 38               | 38  | 38  | 38  | 100%              | 100% | 100% | 100% | P                     | P  | P  | P  |      |
| b0009   | mog    | 9306  | 9893  | +         | 587  | 23           | 23               | 23  | 23  | 23  | 100%              | 100% | 100% | 100% | P                     | P  | P  | P  | U    |
| b0014   | dnaK   | 12163 | 14079 | +         | 1916 | 77           | 77               | 77  | 77  | 77  | 100%              | 100% | 100% | 100% | P                     | P  | P  | P  |      |
| G0-8893 | tpke11 | 14080 | 14168 | +         | 88   | 3            | 3                | 3   | 3   | 3   | 100%              | 100% | 100% | 100% | P                     | P  | P  | P  |      |
| b0015   | dnaJ   | 14168 | 15298 | +         | 1130 | 45           | 45               | 45  | 45  | 45  | 100%              | 100% | 100% | 100% | P                     | P  | P  | P  |      |
| b0016   | insL   | 15445 | 16557 | +         | 1112 | 45           | 45               | 45  | 45  | 45  | 100%              | 100% | 100% | 100% | P                     | P  | P  | P  |      |
| b4413   | sokC   | 16952 | 17006 | +         | 54   | 2            | 0                | 0   | 0   | 2   | 0%                | 0%   | 0%   | 100% | A                     | A  | A  | P  |      |
| b0019   | nhaA   | 17489 | 18655 | +         | 1166 | 47           | 44               | 44  | 45  | 45  | 94%               | 94%  | 96%  | 96%  | P                     | P  | P  | P  |      |
| b0020   | nhaR   | 18715 | 19620 | +         | 905  | 36           | 28               | 29  | 29  | 30  | 78%               | 81%  | 81%  | 83%  | P                     | P  | P  | P  |      |
| b0024   | yaaY   | 21181 | 21399 | +         | 218  | 8            | 0                | 3   | 8   | 8   | 0%                | 38%  | 100% | 100% | A                     | P  | P  | P  | U    |
| b0025   | ribF   | 21407 | 22348 | +         | 941  | 37           | 37               | 37  | 37  | 37  | 100%              | 100% | 100% | 100% | P                     | P  | P  | P  |      |
| b0026   | ileS   | 22391 | 25207 | +         | 2816 | 113          | 113              | 113 | 113 | 113 | 100%              | 100% | 100% | 100% | P                     | P  | P  | P  |      |
| b0027   | lspA   | 25207 | 25701 | +         | 494  | 20           | 20               | 20  | 20  | 20  | 100%              | 100% | 100% | 100% | P                     | P  | P  | P  |      |
| b0028   | fkpB   | 25826 | 26275 | +         | 449  | 18           | 18               | 18  | 18  | 18  | 100%              | 100% | 100% | 100% | P                     | P  | P  | P  |      |
| b0029   | ispH   | 26277 | 27227 | +         | 950  | 38           | 38               | 38  | 38  | 38  | 100%              | 100% | 100% | 100% | P                     | P  | P  | P  |      |
| b0030   | rihC   | 27293 | 28207 | +         | 914  | 37           | 13               | 13  | 14  | 14  | 35%               | 35%  | 38%  | 38%  | P                     | P  | P  | P  |      |
| b0031   | dapB   | 28374 | 29195 | +         | 821  | 33           | 33               | 33  | 33  | 33  | 100%              | 100% | 100% | 100% | P                     | P  | P  | P  |      |
| b0032   | carA   | 29651 | 30799 | +         | 1148 | 46           | 46               | 46  | 46  | 46  | 100%              | 100% | 100% | 100% | P                     | P  | P  | P  |      |
| b0033   | carB   | 30817 | 34038 | +         | 3221 | 129          | 129              | 129 | 129 | 129 | 100%              | 100% | 100% | 100% | P                     | P  | P  | P  |      |
| b0034   | caiF   | 34300 | 34695 | +         | 395  | 16           | 14               | 14  | 14  | 14  | 88%               | 88%  | 88%  | 88%  | P                     | P  | P  | P  |      |
| b0041   | fixA   | 42403 | 43173 | +         | 770  | 31           | 0                | 0   | 0   | 0   | 0%                | 0%   | 0%   | 0%   | A                     | A  | A  | A  | U    |
| b0042   | fixB   | 43188 | 44129 | +         | 941  | 37           | 0                | 0   | 0   | 0   | 0%                | 0%   | 0%   | 0%   | A                     | A  | A  | A  | U    |
| b0043   | fixC   | 44180 | 45466 | +         | 1286 | 52           | 0                | 1   | 1   | 1   | 0%                | 2%   | 2%   | 2%   | A                     | P  | P  | P  | U    |
| b0044   | fixX   | 45463 | 45750 | +         | 287  | 11           | 0                | 0   | 0   | 0   | 0%                | 0%   | 0%   | 0%   | A                     | A  | A  | A  | U    |
| b0045   | yaaU   | 45807 | 47138 | +         | 1331 | 54           | 0                | 0   | 7   | 7   | 0%                | 0%   | 13%  | 13%  | A                     | A  | P  | P  | U    |
| b0046   | kefF   | 47246 | 47776 | +         | 530  | 21           | 16               | 16  | 16  | 16  | 76%               | 76%  | 76%  | 76%  | P                     | P  | P  | P  |      |
| b0047   | kefC   | 47769 | 49631 | +         | 1862 | 74           | 50               | 50  | 50  | 50  | 68%               | 68%  | 68%  | 68%  | P                     | P  | P  | P  |      |
| b0048   | folA   | 49823 | 50302 | +         | 479  | 19           | 18               | 18  | 19  | 19  | 95%               | 95%  | 100% | 100% | P                     | P  | P  | P  |      |
| b0055   | djIA   | 57364 | 58179 | +         | 815  | 32           | 32               | 32  | 32  | 32  | 100%              | 100% | 100% | 100% | P                     | P  | P  | P  |      |
| b4659   | yabP   | 58474 | 59269 | +         | 795  | 32           | 29               | 29  | 30  | 30  | 91%               | 91%  | 94%  | 94%  | P                     | P  | P  | P  | U    |
| b0064   | araC   | 70387 | 71265 | +         | 878  | 35           | 33               | 34  | 34  | 34  | 94%               | 97%  | 97%  | 97%  | P                     | P  | P  | P  |      |
| b0065   | yabI   | 71351 | 72115 | +         | 764  | 31           | 21               | 23  | 24  | 25  | 68%               | 74%  | 77%  | 81%  | P                     | P  | P  | P  | U    |
| b4577   | sgrS   | 77367 | 77593 | +         | 226  | 9            | 6                | 6   | 6   | 6   | 67%               | 67%  | 67%  | 67%  | P                     | P  | P  | P  |      |
| b0070   | setA   | 77621 | 78799 | +         | 1178 | 47           | 27               | 28  | 29  | 29  | 57%               | 60%  | 62%  | 62%  | P                     | P  | P  | P  |      |

|       |      |        |        |   |      |     |     |     |     |     |      |      |      |      |   |   |   |   |
|-------|------|--------|--------|---|------|-----|-----|-----|-----|-----|------|------|------|------|---|---|---|---|
| b0076 | leuO | 84368  | 85312  | + | 944  | 38  | 0   | 0   | 0   | 4   | 0%   | 0%   | 0%   | 11%  | A | A | A | P |
| b0077 | ilvI | 85630  | 87354  | + | 1724 | 69  | 69  | 69  | 69  | 69  | 100% | 100% | 100% | 100% | P | P | P | P |
| b0078 | ilvH | 87357  | 87848  | + | 491  | 20  | 20  | 20  | 20  | 20  | 100% | 100% | 100% | 100% | P | P | P | P |
| b0080 | fruR | 88028  | 89032  | + | 1004 | 40  | 38  | 38  | 38  | 38  | 95%  | 95%  | 95%  | 95%  | P | P | P | P |
| b0081 | mraZ | 89634  | 90092  | + | 458  | 19  | 19  | 19  | 19  | 19  | 100% | 100% | 100% | 100% | P | P | P | P |
| b0082 | mraW | 90094  | 91035  | + | 941  | 38  | 38  | 38  | 38  | 38  | 100% | 100% | 100% | 100% | P | P | P | P |
| b0083 | ftsL | 91032  | 91397  | + | 365  | 15  | 15  | 15  | 15  | 15  | 100% | 100% | 100% | 100% | P | P | P | P |
| b0084 | ftsI | 91413  | 93179  | + | 1766 | 70  | 69  | 69  | 69  | 69  | 99%  | 99%  | 99%  | 99%  | P | P | P | P |
| b0085 | murE | 93166  | 94653  | + | 1487 | 59  | 59  | 59  | 59  | 59  | 100% | 100% | 100% | 100% | P | P | P | P |
| b0086 | murF | 94650  | 96008  | + | 1358 | 54  | 54  | 54  | 54  | 54  | 100% | 100% | 100% | 100% | P | P | P | P |
| b0087 | mraY | 96002  | 97084  | + | 1082 | 44  | 44  | 44  | 44  | 44  | 100% | 100% | 100% | 100% | P | P | P | P |
| b0088 | murD | 97087  | 98403  | + | 1316 | 52  | 51  | 51  | 51  | 51  | 98%  | 98%  | 98%  | 98%  | P | P | P | P |
| b0089 | ftsW | 98403  | 99647  | + | 1244 | 50  | 50  | 50  | 50  | 50  | 100% | 100% | 100% | 100% | P | P | P | P |
| b0090 | murG | 99644  | 100711 | + | 1067 | 43  | 43  | 43  | 43  | 43  | 100% | 100% | 100% | 100% | P | P | P | P |
| b0091 | murC | 100765 | 102240 | + | 1475 | 59  | 58  | 58  | 58  | 58  | 98%  | 98%  | 98%  | 98%  | P | P | P | P |
| b0092 | ddlB | 102233 | 103153 | + | 920  | 37  | 37  | 37  | 37  | 37  | 100% | 100% | 100% | 100% | P | P | P | P |
| b0093 | ftsQ | 103155 | 103985 | + | 830  | 34  | 34  | 34  | 34  | 34  | 100% | 100% | 100% | 100% | P | P | P | P |
| b0094 | ftsA | 103982 | 105244 | + | 1262 | 51  | 51  | 51  | 51  | 51  | 100% | 100% | 100% | 100% | P | P | P | P |
| b0095 | ftsZ | 105305 | 106456 | + | 1151 | 46  | 46  | 46  | 46  | 46  | 100% | 100% | 100% | 100% | P | P | P | P |
| b0096 | lpxC | 106557 | 107474 | + | 917  | 37  | 37  | 37  | 37  | 37  | 100% | 100% | 100% | 100% | P | P | P | P |
| b0097 | secM | 107705 | 108217 | + | 512  | 21  | 21  | 21  | 21  | 21  | 100% | 100% | 100% | 100% | P | P | P | P |
| b0098 | secA | 108279 | 110984 | + | 2705 | 109 | 109 | 109 | 109 | 109 | 100% | 100% | 100% | 100% | P | P | P | P |
| b0099 | mutT | 111044 | 111433 | + | 389  | 15  | 9   | 9   | 10  | 10  | 60%  | 60%  | 67%  | 67%  | P | P | P | P |
| b0104 | guaC | 113444 | 114487 | + | 1043 | 42  | 42  | 42  | 42  | 42  | 100% | 100% | 100% | 100% | P | P | P | P |
| b0110 | ampD | 118733 | 119284 | + | 551  | 23  | 21  | 21  | 21  | 21  | 91%  | 91%  | 91%  | 91%  | P | P | P | P |
| b0111 | ampE | 119281 | 120135 | + | 854  | 35  | 25  | 25  | 25  | 26  | 71%  | 71%  | 71%  | 74%  | P | P | P | P |
| b0113 | pdhR | 122092 | 122856 | + | 764  | 30  | 27  | 27  | 27  | 27  | 90%  | 90%  | 90%  | 90%  | P | P | P | P |
| b0114 | aceE | 123017 | 125680 | + | 2663 | 106 | 106 | 106 | 106 | 106 | 100% | 100% | 100% | 100% | P | P | P | P |
| b0115 | aceF | 125695 | 127587 | + | 1892 | 75  | 75  | 75  | 75  | 75  | 100% | 100% | 100% | 100% | P | P | P | P |
| b0116 | lpd  | 127912 | 129336 | + | 1424 | 57  | 57  | 57  | 57  | 57  | 100% | 100% | 100% | 100% | P | P | P | P |
| b0118 | acnB | 131615 | 134212 | + | 2597 | 104 | 104 | 104 | 104 | 104 | 100% | 100% | 100% | 100% | P | P | P | P |
| b0119 | yacL | 134388 | 134750 | + | 362  | 15  | 13  | 13  | 15  | 15  | 87%  | 87%  | 100% | 100% | P | P | P | P |
| b0123 | cueO | 137083 | 138633 | + | 1550 | 62  | 61  | 61  | 61  | 61  | 98%  | 98%  | 98%  | 98%  | P | P | P | P |
| b0125 | hpt  | 141431 | 141967 | + | 536  | 21  | 21  | 21  | 21  | 21  | 100% | 100% | 100% | 100% | P | P | P | P |
| b0127 | yadG | 142779 | 143705 | + | 926  | 37  | 36  | 36  | 36  | 36  | 97%  | 97%  | 97%  | 97%  | P | P | P | P |
| b0128 | yadH | 143702 | 144472 | + | 770  | 31  | 26  | 26  | 26  | 26  | 84%  | 84%  | 84%  | 84%  | P | P | P | P |
|       | yadI | 144577 | 145017 | + | 440  | 17  | 3   | 3   | 7   | 7   | 18%  | 18%  | 41%  | 41%  | P | P | P | P |
| b0130 | yadE | 145081 | 146310 | + | 1229 | 49  | 14  | 16  | 16  | 19  | 29%  | 33%  | 33%  | 39%  | P | P | P | P |
| b0132 | yadD | 146968 | 147870 | + | 902  | 36  | 9   | 9   | 9   | 9   | 25%  | 25%  | 25%  | 25%  | P | P | P | P |
| b0148 | hrpB | 162105 | 164534 | + | 2429 | 97  | 78  | 79  | 79  | 79  | 80%  | 81%  | 81%  | 81%  | P | P | P | P |
| b0149 | mrcB | 164730 | 167264 | + | 2534 | 101 | 94  | 94  | 94  | 94  | 93%  | 93%  | 93%  | 93%  | P | P | P | P |
| b0150 | fhuA | 167484 | 169727 | + | 2243 | 90  | 86  | 86  | 86  | 88  | 96%  | 96%  | 96%  | 98%  | P | P | P | P |
| b0151 | fhuC | 169778 | 170575 | + | 797  | 31  | 22  | 22  | 22  | 26  | 71%  | 71%  | 71%  | 84%  | P | P | P | P |
| b0152 | fhuD | 170575 | 171465 | + | 890  | 36  | 16  | 16  | 16  | 22  | 44%  | 44%  | 44%  | 61%  | P | P | P | P |
| b0153 | fhuB | 171462 | 173444 | + | 1982 | 79  | 20  | 20  | 21  | 29  | 25%  | 25%  | 27%  | 37%  | P | P | P | P |
| b0155 | clcA | 175107 | 176528 | + | 1421 | 57  | 45  | 48  | 50  | 55  | 79%  | 84%  | 88%  | 96%  | P | P | P | P |

U

U

U

U

U

U

U

U

U

|         |       |        |        |   |      |     |     |     |     |     |      |      |      |      |   |   |   |   |   |
|---------|-------|--------|--------|---|------|-----|-----|-----|-----|-----|------|------|------|------|---|---|---|---|---|
| b0156   | erpA  | 176610 | 176954 | + | 344  | 14  | 14  | 14  | 14  | 14  | 100% | 100% | 100% | 100% | P | P | P | P | U |
| b0160   | dgt   | 179237 | 180754 | + | 1517 | 60  | 51  | 51  | 51  | 51  | 85%  | 85%  | 85%  | 85%  | P | P | P | P |   |
| b0161   | degP  | 180884 | 182308 | + | 1424 | 57  | 57  | 57  | 57  | 57  | 100% | 100% | 100% | 100% | P | P | P | P |   |
| b0162   | cdaR  | 182463 | 183620 | + | 1157 | 46  | 13  | 14  | 16  | 16  | 28%  | 30%  | 35%  | 35%  | P | P | P | P | U |
| b4414   | tff   | 189712 | 189847 | + | 135  | 5   | 5   | 5   | 5   | 5   | 100% | 100% | 100% | 100% | P | P | P | P | U |
| b0169   | rpsB  | 189874 | 190599 | + | 725  | 29  | 29  | 29  | 29  | 29  | 100% | 100% | 100% | 100% | P | P | P | P |   |
| b0170   | tsf   | 190857 | 191708 | + | 851  | 35  | 35  | 35  | 35  | 35  | 100% | 100% | 100% | 100% | P | P | P | P |   |
| b0171   | pyrH  | 191855 | 192580 | + | 725  | 29  | 29  | 29  | 29  | 29  | 100% | 100% | 100% | 100% | P | P | P | P |   |
| b0172   | frr   | 192872 | 193429 | + | 557  | 22  | 22  | 22  | 22  | 22  | 100% | 100% | 100% | 100% | P | P | P | P |   |
| b0173   | dxr   | 193521 | 194717 | + | 1196 | 48  | 45  | 45  | 45  | 45  | 94%  | 94%  | 94%  | 94%  | P | P | P | P |   |
| b0174   | ispU  | 194903 | 195664 | + | 761  | 31  | 31  | 31  | 31  | 31  | 100% | 100% | 100% | 100% | P | P | P | P |   |
| b0175   | cdsA  | 195677 | 196534 | + | 857  | 35  | 35  | 35  | 35  | 35  | 100% | 100% | 100% | 100% | P | P | P | P |   |
| b0176   | rseP  | 196546 | 197898 | + | 1352 | 54  | 54  | 54  | 54  | 54  | 100% | 100% | 100% | 100% | P | P | P | P |   |
| b0177   | bamA  | 197928 | 200360 | + | 2432 | 98  | 98  | 98  | 98  | 98  | 100% | 100% | 100% | 100% | P | P | P | P | U |
| b0178   | skp   | 200482 | 200967 | + | 485  | 20  | 20  | 20  | 20  | 20  | 100% | 100% | 100% | 100% | P | P | P | P |   |
| b0179   | lpxD  | 200971 | 201996 | + | 1025 | 41  | 41  | 41  | 41  | 41  | 100% | 100% | 100% | 100% | P | P | P | P |   |
| b0180   | fabZ  | 202101 | 202556 | + | 455  | 18  | 18  | 18  | 18  | 18  | 100% | 100% | 100% | 100% | P | P | P | P |   |
| b0181   | lpxA  | 202560 | 203348 | + | 788  | 31  | 31  | 31  | 31  | 31  | 100% | 100% | 100% | 100% | P | P | P | P |   |
| b0182   | lpxB  | 203348 | 204496 | + | 1148 | 46  | 46  | 46  | 46  | 46  | 100% | 100% | 100% | 100% | P | P | P | P |   |
| b0183   | rnhB  | 204493 | 205089 | + | 596  | 24  | 24  | 24  | 24  | 24  | 100% | 100% | 100% | 100% | P | P | P | P |   |
| b0184   | dnaE  | 205126 | 208608 | + | 3482 | 140 | 139 | 139 | 139 | 139 | 99%  | 99%  | 99%  | 99%  | P | P | P | P |   |
| b0185   | accA  | 208621 | 209580 | + | 959  | 38  | 36  | 36  | 36  | 36  | 95%  | 95%  | 95%  | 95%  | P | P | P | P |   |
| b0186   | ldcC  | 209679 | 211820 | + | 2141 | 86  | 77  | 77  | 77  | 85  | 90%  | 90%  | 90%  | 99%  | P | P | P | P |   |
| b0187   | yaeR  | 211877 | 212266 | + | 389  | 16  | 16  | 16  | 16  | 16  | 100% | 100% | 100% | 100% | P | P | P | P | U |
| b0188   | tilS  | 212331 | 213629 | + | 1298 | 52  | 49  | 49  | 49  | 49  | 94%  | 94%  | 94%  | 94%  | P | P | P | P |   |
| b0190   | yaeQ  | 214291 | 214836 | + | 545  | 22  | 22  | 22  | 22  | 22  | 100% | 100% | 100% | 100% | P | P | P | P | U |
| b0191   | yaeJ  | 214833 | 215255 | + | 422  | 16  | 16  | 16  | 16  | 16  | 100% | 100% | 100% | 100% | P | P | P | P | U |
| b0192   | nlpE  | 215269 | 215979 | + | 710  | 28  | 27  | 27  | 27  | 27  | 96%  | 96%  | 96%  | 96%  | P | P | P | P |   |
| b0200   | gmhB  | 222833 | 223408 | + | 575  | 23  | 23  | 23  | 23  | 23  | 100% | 100% | 100% | 100% | P | P | P | P |   |
| b0201   | rrsH  | 223771 | 225312 | + | 1541 | 62  | 62  | 62  | 62  | 62  | 100% | 100% | 100% | 100% | P | P | P | P |   |
| b0202   | ileV  | 225381 | 225457 | + | 76   | 4   | 4   | 4   | 4   | 4   | 100% | 100% | 100% | 100% | P | P | P | P |   |
| b0203   | alaV  | 225500 | 225575 | + | 75   | 3   | 3   | 3   | 3   | 3   | 100% | 100% | 100% | 100% | P | P | P | P |   |
| b0204   | rrlH  | 225759 | 228662 | + | 2903 | 116 | 116 | 116 | 116 | 116 | 100% | 100% | 100% | 100% | P | P | P | P |   |
| b0205   | rrfH  | 228756 | 228875 | + | 119  | 5   | 5   | 5   | 5   | 5   | 100% | 100% | 100% | 100% | P | P | P | P |   |
| b0206   | aspU  | 228928 | 229004 | + | 76   | 3   | 3   | 3   | 3   | 3   | 100% | 100% | 100% | 100% | P | P | P | P |   |
| b0207   | dkgB  | 229167 | 229970 | + | 803  | 32  | 22  | 22  | 22  | 22  | 69%  | 69%  | 69%  | 69%  | P | P | P | P |   |
| b0209   | yafD  | 231122 | 231922 | + | 800  | 32  | 32  | 32  | 32  | 32  | 100% | 100% | 100% | 100% | P | P | P | P | U |
| b0210   | yafE  | 231926 | 232549 | + | 623  | 25  | 13  | 24  | 24  | 24  | 52%  | 96%  | 96%  | 96%  | P | P | P | P | U |
| b0213   | yafS  | 234816 | 235538 | + | 722  | 29  | 22  | 22  | 22  | 22  | 76%  | 76%  | 76%  | 76%  | P | P | P | P | U |
| b0215   | dnaQ  | 236067 | 236798 | + | 731  | 29  | 29  | 29  | 29  | 29  | 100% | 100% | 100% | 100% | P | P | P | P |   |
| b0216   | aspV  | 236931 | 237007 | + | 76   | 3   | 3   | 3   | 3   | 3   | 100% | 100% | 100% | 100% | P | P | P | P |   |
| b0217   | yafT  | 237335 | 238120 | + | 785  | 32  | 0   | 0   | 0   | 0   | 0%   | 0%   | 0%   | 0%   | A | A | A | A | U |
| GO-8896 | C0067 | 238462 | 238586 | + | 124  | 5   | 0   | 0   | 0   | 0   | 0%   | 0%   | 0%   | 0%   | A | A | A | A |   |
| b4503   | yafF  | 239106 | 239378 | + | 272  | 11  | 0   | 0   | 0   | 0   | 0%   | 0%   | 0%   | 0%   | A | A | A | A | U |
| b0220   | ivy   | 240343 | 240816 | + | 473  | 19  | 19  | 19  | 19  | 19  | 100% | 100% | 100% | 100% | P | P | P | P |   |
| b0222   | lpcA  | 243543 | 244121 | + | 578  | 23  | 23  | 23  | 23  | 23  | 100% | 100% | 100% | 100% | P | P | P | P |   |

|       |      |        |        |   |      |    |    |    |    |    |      |      |      |      |   |   |   |   |   |
|-------|------|--------|--------|---|------|----|----|----|----|----|------|------|------|------|---|---|---|---|---|
| b0223 | yafJ | 244327 | 245094 | + | 767  | 31 | 29 | 29 | 29 | 29 | 94%  | 94%  | 94%  | 94%  | P | P | P | P | U |
| b0227 | yafL | 246712 | 247461 | + | 749  | 30 | 0  | 4  | 9  | 9  | 0%   | 13%  | 30%  | 30%  | A | P | P | P | U |
| b0228 | yafM | 247637 | 248134 | + | 497  | 20 | 8  | 10 | 10 | 10 | 40%  | 50%  | 50%  | 50%  | P | P | P | P | U |
| b0230 | lafU | 250072 | 250827 | + | 755  | 30 | 0  | 0  | 8  | 8  | 0%   | 0%   | 27%  | 27%  | A | A | P | P | U |
| b0231 | dinB | 250898 | 251953 | + | 1055 | 42 | 27 | 27 | 31 | 32 | 64%  | 64%  | 74%  | 76%  | P | P | P | P |   |
| b0232 | yafN | 252005 | 252298 | + | 293  | 12 | 10 | 11 | 11 | 11 | 83%  | 92%  | 92%  | 92%  | P | P | P | P | U |
| b0233 | yafO | 252301 | 252699 | + | 398  | 16 | 5  | 5  | 5  | 5  | 31%  | 31%  | 31%  | 31%  | P | P | P | P | U |
| b0234 | yafP | 252709 | 253161 | + | 452  | 18 | 2  | 2  | 2  | 2  | 11%  | 11%  | 11%  | 11%  | P | P | P | P | U |
| b0235 | ykfJ | 253479 | 253685 | + | 206  | 8  | 0  | 0  | 0  | 0  | 0%   | 0%   | 0%   | 0%   | A | A | A | A | U |
| b0236 | prfH | 253702 | 254202 | + | 500  | 20 | 0  | 2  | 2  | 2  | 0%   | 10%  | 10%  | 10%  | A | P | P | P | U |
| b0238 | gpt  | 255977 | 256435 | + | 458  | 18 | 18 | 18 | 18 | 18 | 100% | 100% | 100% | 100% | P | P | P | P |   |
| b0239 | frsA | 256527 | 257771 | + | 1244 | 50 | 50 | 50 | 50 | 50 | 100% | 100% | 100% | 100% | P | P | P | P |   |
| b0240 | crl  | 257829 | 258230 | + | 401  | 16 | 16 | 16 | 16 | 16 | 100% | 100% | 100% | 100% | P | P | P | P |   |
| b0242 | proB | 259612 | 260715 | + | 1103 | 45 | 45 | 45 | 45 | 45 | 100% | 100% | 100% | 100% | P | P | P | P |   |
| b0243 | proA | 260727 | 261980 | + | 1253 | 50 | 48 | 48 | 48 | 48 | 96%  | 96%  | 96%  | 96%  | P | P | P | P |   |
| b0244 | thrW | 262095 | 262170 | + | 75   | 3  | 3  | 3  | 3  | 3  | 100% | 100% | 100% | 100% | P | P | P | P |   |
| b4587 | insN | 269502 | 269759 | + | 257  | 10 | 7  | 7  | 10 | 10 | 70%  | 70%  | 100% | 100% | P | P | P | P | U |
| b0256 | insI | 269827 | 270978 | + | 1151 | 46 | 45 | 45 | 45 | 45 | 98%  | 98%  | 98%  | 98%  | P | P | P | P |   |
| b4587 | insN | 270988 | 271413 | + | 425  | 17 | 15 | 15 | 15 | 15 | 88%  | 88%  | 88%  | 88%  | P | P | P | P | U |
| b0258 | ykfC | 272071 | 273178 | + | 1107 | 44 | 10 | 10 | 10 | 10 | 23%  | 23%  | 23%  | 23%  | P | P | P | P | U |
| b0260 | mmuP | 274549 | 275952 | + | 1403 | 56 | 53 | 56 | 56 | 56 | 95%  | 100% | 100% | 100% | P | P | P | P | U |
| b0261 | mmuM | 275939 | 276871 | + | 932  | 38 | 36 | 37 | 37 | 37 | 95%  | 97%  | 97%  | 97%  | P | P | P | P |   |
| b0268 | yagE | 281481 | 282410 | + | 929  | 37 | 0  | 0  | 6  | 6  | 0%   | 0%   | 16%  | 16%  | A | A | P | P | U |
| b0269 | yagF | 282425 | 284392 | + | 1967 | 79 | 0  | 0  | 4  | 4  | 0%   | 0%   | 5%   | 5%   | A | A | P | P | U |
| b0270 | yagG | 284619 | 286001 | + | 1382 | 55 | 0  | 0  | 2  | 2  | 0%   | 0%   | 4%   | 4%   | A | A | P | P | U |
| b0271 | yagH | 286013 | 287623 | + | 1610 | 65 | 0  | 0  | 2  | 2  | 0%   | 0%   | 3%   | 3%   | A | A | P | P | U |
| b0276 | yagJ | 290724 | 291455 | + | 731  | 29 | 4  | 4  | 8  | 8  | 14%  | 14%  | 28%  | 28%  | P | P | P | P | U |
| b4629 | ptwF | 296430 | 296478 | + | 48   | 2  | 2  | 2  | 2  | 2  | 100% | 100% | 100% | 100% | P | P | P | P |   |
| b0287 | yagU | 302215 | 302829 | + | 614  | 25 | 25 | 25 | 25 | 25 | 100% | 100% | 100% | 100% | P | P | P | P | U |
| b0295 | ykgL | 311336 | 311563 | + | 227  | 9  | 0  | 0  | 0  | 0  | 0%   | 0%   | 0%   | 0%   | A | A | A | A | U |
| b0297 | eaeH | 313581 | 314452 | + | 871  | 35 | 0  | 0  | 0  | 0  | 0%   | 0%   | 0%   | 0%   | A | A | A | A | U |
| b0298 | insE | 314506 | 314814 | + | 308  | 12 | 12 | 12 | 12 | 12 | 100% | 100% | 100% | 100% | P | P | P | P |   |
| b0299 | insF | 314811 | 315677 | + | 866  | 35 | 33 | 33 | 33 | 33 | 94%  | 94%  | 94%  | 94%  | P | P | P | P |   |
| b4631 | ykgQ | 316663 | 316791 | + | 128  | 5  | 0  | 0  | 0  | 0  | 0%   | 0%   | 0%   | 0%   | A | A | A | A | U |
| b0305 | ykgD | 319451 | 320305 | + | 854  | 34 | 0  | 3  | 3  | 3  | 0%   | 9%   | 9%   | 9%   | A | P | P | P | U |
| b0306 | ykgE | 320832 | 321551 | + | 719  | 29 | 1  | 10 | 10 | 10 | 3%   | 34%  | 34%  | 34%  | P | P | P | P | U |
| b0307 | ykgF | 321562 | 322989 | + | 1427 | 57 | 8  | 27 | 27 | 27 | 14%  | 47%  | 47%  | 47%  | P | P | P | P | U |
| b0308 | ykgG | 322982 | 323677 | + | 695  | 28 | 4  | 19 | 20 | 20 | 14%  | 68%  | 71%  | 71%  | P | P | P | P | U |
| b0314 | betT | 328687 | 330720 | + | 2033 | 82 | 77 | 77 | 80 | 80 | 94%  | 94%  | 98%  | 98%  | P | P | P | P |   |
| b0315 | yahA | 331595 | 332683 | + | 1088 | 43 | 18 | 18 | 18 | 34 | 42%  | 42%  | 42%  | 79%  | P | P | P | P | U |
| b0318 | yahD | 334504 | 335109 | + | 605  | 24 | 0  | 0  | 1  | 1  | 0%   | 0%   | 4%   | 4%   | A | A | P | P | U |
| b0319 | yahE | 335149 | 336012 | + | 863  | 34 | 0  | 0  | 2  | 2  | 0%   | 0%   | 6%   | 6%   | A | A | P | P | U |
| b0320 | yahF | 336002 | 337549 | + | 1547 | 62 | 0  | 0  | 6  | 6  | 0%   | 0%   | 10%  | 10%  | A | A | P | P | U |
| b0321 | yahG | 337549 | 338967 | + | 1418 | 56 | 0  | 1  | 6  | 6  | 0%   | 2%   | 11%  | 11%  | A | P | P | P | U |
| b0323 | yahI | 339389 | 340339 | + | 950  | 38 | 0  | 0  | 3  | 3  | 0%   | 0%   | 8%   | 8%   | A | A | P | P | U |
| b0324 | yahJ | 340349 | 341731 | + | 1382 | 55 | 41 | 42 | 42 | 42 | 75%  | 76%  | 76%  | 76%  | P | P | P | P | U |

|       |      |        |        |   |      |    |    |    |    |    |      |      |      |      |   |   |   |   |   |
|-------|------|--------|--------|---|------|----|----|----|----|----|------|------|------|------|---|---|---|---|---|
| b0325 | yahK | 342108 | 343157 | + | 1049 | 42 | 41 | 41 | 41 | 42 | 98%  | 98%  | 98%  | 100% | P | P | P | P | U |
| b0326 | yahL | 343400 | 344215 | + | 815  | 32 | 0  | 0  | 0  | 0  | 0%   | 0%   | 0%   | 0%   | A | A | A | A | U |
| b0327 | yahM | 344628 | 344873 | + | 245  | 10 | 1  | 1  | 1  | 1  | 10%  | 10%  | 10%  | 10%  | P | P | P | P | U |
| b0329 | yahO | 345708 | 345983 | + | 275  | 11 | 10 | 11 | 11 | 11 | 91%  | 100% | 100% | 100% | P | P | P | P | U |
| b0331 | prpB | 347906 | 348796 | + | 890  | 36 | 0  | 0  | 34 | 34 | 0%   | 0%   | 94%  | 94%  | A | A | P | P |   |
| b0333 | prpC | 349236 | 350405 | + | 1169 | 47 | 0  | 0  | 11 | 11 | 0%   | 0%   | 23%  | 23%  | A | A | P | P |   |
| b0334 | prpD | 350439 | 351890 | + | 1451 | 58 | 0  | 0  | 1  | 1  | 0%   | 0%   | 2%   | 2%   | A | A | P | P |   |
| b0335 | prpE | 351930 | 353816 | + | 1886 | 75 | 0  | 0  | 7  | 7  | 0%   | 0%   | 9%   | 9%   | A | A | P | P | U |
| b0336 | codB | 354146 | 355405 | + | 1259 | 50 | 50 | 50 | 50 | 50 | 100% | 100% | 100% | 100% | P | P | P | P |   |
| b0337 | codA | 355395 | 356678 | + | 1283 | 51 | 51 | 51 | 51 | 51 | 100% | 100% | 100% | 100% | P | P | P | P |   |
| b0339 | cynT | 358023 | 358682 | + | 659  | 26 | 0  | 0  | 0  | 0  | 0%   | 0%   | 0%   | 0%   | A | A | A | A |   |
| b0340 | cynS | 358713 | 359183 | + | 470  | 19 | 0  | 0  | 0  | 0  | 0%   | 0%   | 0%   | 0%   | A | A | A | A |   |
| b0341 | cynX | 359216 | 360370 | + | 1154 | 47 | 0  | 0  | 0  | 0  | 0%   | 0%   | 0%   | 0%   | A | A | A | A | U |
| b0347 | mhpA | 367835 | 369499 | + | 1664 | 66 | 0  | 0  | 2  | 2  | 0%   | 0%   | 3%   | 3%   | A | A | P | P |   |
| b0348 | mhpB | 369501 | 370445 | + | 944  | 38 | 0  | 0  | 1  | 1  | 0%   | 0%   | 3%   | 3%   | A | A | P | P |   |
| b0349 | mhpC | 370448 | 371329 | + | 881  | 36 | 0  | 0  | 1  | 1  | 0%   | 0%   | 3%   | 3%   | A | A | P | P |   |
| b0350 | mhpD | 371339 | 372148 | + | 809  | 32 | 0  | 0  | 1  | 1  | 0%   | 0%   | 3%   | 3%   | A | A | P | P |   |
| b0351 | mhpF | 372145 | 373095 | + | 950  | 38 | 0  | 5  | 5  | 5  | 0%   | 13%  | 13%  | 13%  | A | P | P | P |   |
| b0352 | mhpE | 373092 | 374105 | + | 1013 | 41 | 0  | 6  | 10 | 10 | 0%   | 15%  | 24%  | 24%  | A | P | P | P |   |
| b0353 | mhpT | 374683 | 375894 | + | 1211 | 48 | 0  | 1  | 6  | 6  | 0%   | 2%   | 13%  | 13%  | A | P | P | P | U |
| b0354 | yaiL | 375996 | 376535 | + | 539  | 22 | 22 | 22 | 22 | 22 | 100% | 100% | 100% | 100% | P | P | P | P |   |
| b0360 | insC | 380575 | 380940 | + | 365  | 15 | 15 | 15 | 15 | 15 | 100% | 100% | 100% | 100% | P | P | P | P |   |
| b0361 | insD | 380898 | 381803 | + | 905  | 36 | 36 | 36 | 36 | 36 | 100% | 100% | 100% | 100% | P | P | P | P |   |
| b0365 | tauA | 384456 | 385418 | + | 962  | 39 | 0  | 0  | 0  | 0  | 0%   | 0%   | 0%   | 0%   | A | A | A | A |   |
| b0366 | tauB | 385431 | 386198 | + | 767  | 31 | 2  | 7  | 7  | 7  | 6%   | 23%  | 23%  | 23%  | P | P | P | P |   |
| b0367 | tauC | 386195 | 387022 | + | 827  | 33 | 3  | 3  | 5  | 5  | 9%   | 9%   | 15%  | 15%  | P | P | P | P |   |
| b0368 | tauD | 387019 | 387870 | + | 851  | 34 | 0  | 8  | 10 | 10 | 0%   | 24%  | 29%  | 29%  | A | P | P | P |   |
| b4580 | yaiT | 389475 | 390932 | + | 1457 | 58 | 0  | 0  | 0  | 0  | 0%   | 0%   | 0%   | 0%   | A | A | A | A | U |
| b4580 | yaiT | 392191 | 393642 | + | 1451 | 58 | 0  | 4  | 14 | 14 | 0%   | 7%   | 24%  | 24%  | A | P | P | P | U |
| b0375 | yaiV | 393685 | 394353 | + | 668  | 27 | 0  | 0  | 0  | 0  | 0%   | 0%   | 0%   | 0%   | A | A | A | A | U |
| b0377 | sbmA | 395863 | 397083 | + | 1220 | 48 | 21 | 26 | 30 | 33 | 44%  | 54%  | 63%  | 69%  | P | P | P | P | U |
| b0378 | yaiW | 397096 | 398190 | + | 1094 | 44 | 41 | 41 | 41 | 41 | 93%  | 93%  | 93%  | 93%  | P | P | P | P | U |
| b0380 | yaiZ | 398817 | 399029 | + | 212  | 9  | 8  | 8  | 8  | 8  | 89%  | 89%  | 89%  | 89%  | P | P | P | P | U |
| b0382 | iraP | 400610 | 400870 | + | 260  | 10 | 10 | 10 | 10 | 10 | 100% | 100% | 100% | 100% | P | P | P | P | U |
| b0383 | phoA | 400971 | 402386 | + | 1415 | 57 | 33 | 33 | 33 | 33 | 58%  | 58%  | 58%  | 58%  | P | P | P | P |   |
| b0384 | psiF | 402505 | 402825 | + | 320  | 12 | 12 | 12 | 12 | 12 | 100% | 100% | 100% | 100% | P | P | P | P | U |
| b0385 | adrA | 402927 | 404042 | + | 1115 | 45 | 0  | 0  | 6  | 6  | 0%   | 0%   | 13%  | 13%  | A | A | P | P | U |
| b0387 | yaiI | 404988 | 405446 | + | 458  | 18 | 18 | 18 | 18 | 18 | 100% | 100% | 100% | 100% | P | P | P | P | U |
| b0388 | aroL | 405629 | 406153 | + | 524  | 21 | 21 | 21 | 21 | 21 | 100% | 100% | 100% | 100% | P | P | P | P |   |
| b0389 | yaiA | 406203 | 406394 | + | 191  | 8  | 8  | 8  | 8  | 8  | 100% | 100% | 100% | 100% | P | P | P | P | U |
| b0390 | aroM | 406652 | 407329 | + | 677  | 27 | 24 | 24 | 24 | 24 | 89%  | 89%  | 89%  | 89%  | P | P | P | P | U |
| b0391 | yaiE | 407401 | 407685 | + | 284  | 12 | 11 | 12 | 12 | 12 | 92%  | 100% | 100% | 100% | P | P | P | P | U |
| b0392 | ykiA | 407893 | 408174 | + | 281  | 11 | 3  | 7  | 10 | 10 | 27%  | 64%  | 91%  | 91%  | P | P | P | P | U |
| b0394 | mak  | 409368 | 410276 | + | 908  | 36 | 33 | 33 | 33 | 35 | 92%  | 92%  | 92%  | 97%  | P | P | P | P |   |
| b0399 | phoB | 416366 | 417055 | + | 689  | 27 | 21 | 27 | 27 | 27 | 78%  | 100% | 100% | 100% | P | P | P | P |   |
| b0400 | phoR | 417113 | 418408 | + | 1295 | 52 | 14 | 45 | 45 | 45 | 27%  | 87%  | 87%  | 87%  | P | P | P | P |   |

|       |      |        |        |   |      |     |     |     |     |     |      |      |      |      |   |   |   |   |   |
|-------|------|--------|--------|---|------|-----|-----|-----|-----|-----|------|------|------|------|---|---|---|---|---|
| b0401 | brnQ | 418815 | 420134 | + | 1319 | 53  | 49  | 49  | 49  | 49  | 92%  | 92%  | 92%  | 92%  | P | P | P | P | U |
| b0402 | proY | 420210 | 421583 | + | 1373 | 55  | 35  | 35  | 35  | 35  | 64%  | 64%  | 64%  | 64%  | P | P | P | P | U |
| b0403 | malZ | 421739 | 423556 | + | 1817 | 73  | 41  | 41  | 41  | 41  | 56%  | 56%  | 56%  | 56%  | P | P | P | P |   |
| b0405 | queA | 424235 | 425305 | + | 1070 | 42  | 41  | 41  | 41  | 41  | 98%  | 98%  | 98%  | 98%  | P | P | P | P |   |
| b0406 | tgt  | 425361 | 426488 | + | 1127 | 45  | 45  | 45  | 45  | 45  | 100% | 100% | 100% | 100% | P | P | P | P |   |
| b0407 | yajC | 426511 | 426843 | + | 332  | 13  | 13  | 13  | 13  | 13  | 100% | 100% | 100% | 100% | P | P | P | P |   |
| b0408 | secD | 426871 | 428718 | + | 1847 | 74  | 74  | 74  | 74  | 74  | 100% | 100% | 100% | 100% | P | P | P | P |   |
| b0409 | secF | 428729 | 429700 | + | 971  | 39  | 39  | 39  | 39  | 39  | 100% | 100% | 100% | 100% | P | P | P | P |   |
| b0410 | yajD | 429829 | 430176 | + | 347  | 14  | 14  | 14  | 14  | 14  | 100% | 100% | 100% | 100% | P | P | P | P | U |
| b0413 | nrdR | 432226 | 432675 | + | 449  | 18  | 18  | 18  | 18  | 18  | 100% | 100% | 100% | 100% | P | P | P | P | U |
| b0414 | ribD | 432679 | 433782 | + | 1103 | 44  | 44  | 44  | 44  | 44  | 100% | 100% | 100% | 100% | P | P | P | P |   |
| b0415 | ribE | 433871 | 434341 | + | 470  | 19  | 19  | 19  | 19  | 19  | 100% | 100% | 100% | 100% | P | P | P | P |   |
| b0416 | nusB | 434361 | 434780 | + | 419  | 17  | 17  | 17  | 17  | 17  | 100% | 100% | 100% | 100% | P | P | P | P |   |
| b0417 | thiL | 434858 | 435835 | + | 977  | 39  | 39  | 39  | 39  | 39  | 100% | 100% | 100% | 100% | P | P | P | P |   |
| b0418 | pgpA | 435813 | 436331 | + | 518  | 20  | 18  | 18  | 18  | 18  | 90%  | 90%  | 90%  | 90%  | P | P | P | P |   |
| b0423 | thiI | 440773 | 442221 | + | 1448 | 58  | 58  | 58  | 58  | 58  | 100% | 100% | 100% | 100% | P | P | P | P |   |
| b0426 | yajQ | 443907 | 444398 | + | 491  | 20  | 20  | 20  | 20  | 20  | 100% | 100% | 100% | 100% | P | P | P | P | U |
| b0435 | bolA | 453696 | 454013 | + | 317  | 13  | 13  | 13  | 13  | 13  | 100% | 100% | 100% | 100% | P | P | P | P |   |
| b0436 | tig  | 454357 | 455655 | + | 1298 | 52  | 52  | 52  | 52  | 52  | 100% | 100% | 100% | 100% | P | P | P | P |   |
| b0437 | clpP | 455901 | 456524 | + | 623  | 25  | 25  | 25  | 25  | 25  | 100% | 100% | 100% | 100% | P | P | P | P |   |
| b0438 | clpX | 456650 | 457924 | + | 1274 | 51  | 51  | 51  | 51  | 51  | 100% | 100% | 100% | 100% | P | P | P | P |   |
| b0439 | lon  | 458112 | 460466 | + | 2354 | 94  | 94  | 94  | 94  | 94  | 100% | 100% | 100% | 100% | P | P | P | P |   |
| b0440 | hupB | 460675 | 460947 | + | 272  | 11  | 11  | 11  | 11  | 11  | 100% | 100% | 100% | 100% | P | P | P | P |   |
| b0441 | ppiD | 461139 | 463010 | + | 1871 | 75  | 75  | 75  | 75  | 75  | 100% | 100% | 100% | 100% | P | P | P | P |   |
| b0442 | ybaV | 463161 | 463532 | + | 371  | 15  | 2   | 4   | 4   | 4   | 13%  | 27%  | 27%  | 27%  | P | P | P | P | U |
| b0443 | ybaW | 463626 | 464024 | + | 398  | 16  | 5   | 9   | 11  | 14  | 31%  | 56%  | 69%  | 88%  | P | P | P | P | U |
| b0446 | cof  | 466636 | 467454 | + | 818  | 32  | 13  | 21  | 21  | 21  | 41%  | 66%  | 66%  | 66%  | P | P | P | P |   |
| b0447 | ybaO | 467607 | 468065 | + | 458  | 18  | 13  | 13  | 16  | 16  | 72%  | 72%  | 89%  | 89%  | P | P | P | P | U |
| b0448 | mdIA | 468095 | 469867 | + | 1772 | 71  | 11  | 11  | 11  | 16  | 15%  | 15%  | 15%  | 23%  | P | P | P | P | U |
| b0449 | mdIB | 469860 | 471641 | + | 1781 | 71  | 11  | 11  | 11  | 13  | 15%  | 15%  | 15%  | 18%  | P | P | P | P | U |
| b0450 | glnK | 471822 | 472160 | + | 338  | 14  | 0   | 0   | 0   | 14  | 0%   | 0%   | 0%   | 100% | A | A | A | P |   |
| b0451 | amtB | 472190 | 473476 | + | 1286 | 51  | 26  | 26  | 26  | 51  | 51%  | 51%  | 51%  | 100% | P | P | P | P |   |
| b0453 | ybaY | 474603 | 475175 | + | 572  | 23  | 23  | 23  | 23  | 23  | 100% | 100% | 100% | 100% | P | P | P | P | U |
| b0455 | ffs  | 475672 | 475785 | + | 113  | 5   | 5   | 5   | 5   | 5   | 100% | 100% | 100% | 100% | P | P | P | P |   |
| b0456 | ybaA | 475896 | 476249 | + | 353  | 14  | 2   | 5   | 9   | 9   | 14%  | 36%  | 64%  | 64%  | P | P | P | P | U |
| b0464 | acrR | 484985 | 485632 | + | 647  | 25  | 15  | 15  | 15  | 15  | 60%  | 60%  | 60%  | 60%  | P | P | P | P |   |
| b0465 | kefA | 485760 | 489122 | + | 3362 | 134 | 125 | 125 | 125 | 125 | 93%  | 93%  | 93%  | 93%  | P | P | P | P | U |
| b0468 | ybaN | 490106 | 490483 | + | 377  | 16  | 15  | 15  | 15  | 15  | 94%  | 94%  | 94%  | 94%  | P | P | P | P | U |
| b0469 | apt  | 490636 | 491187 | + | 551  | 22  | 22  | 22  | 22  | 22  | 100% | 100% | 100% | 100% | P | P | P | P |   |
| b0470 | dnaX | 491316 | 493247 | + | 1931 | 77  | 76  | 76  | 76  | 76  | 99%  | 99%  | 99%  | 99%  | P | P | P | P |   |
| b0471 | ybaB | 493300 | 493629 | + | 329  | 13  | 13  | 13  | 13  | 13  | 100% | 100% | 100% | 100% | P | P | P | P | U |
| b0472 | recR | 493629 | 494234 | + | 605  | 25  | 25  | 25  | 25  | 25  | 100% | 100% | 100% | 100% | P | P | P | P |   |
| b0473 | htpG | 494344 | 496218 | + | 1874 | 75  | 72  | 74  | 74  | 74  | 96%  | 99%  | 99%  | 99%  | P | P | P | P |   |
| b0474 | adk  | 496399 | 497043 | + | 644  | 26  | 26  | 26  | 26  | 26  | 100% | 100% | 100% | 100% | P | P | P | P |   |
| b0475 | hemH | 497279 | 498241 | + | 962  | 39  | 31  | 31  | 31  | 31  | 79%  | 79%  | 79%  | 79%  | P | P | P | P |   |
| b0477 | gsk  | 499349 | 500653 | + | 1304 | 52  | 52  | 52  | 52  | 52  | 100% | 100% | 100% | 100% | P | P | P | P |   |

|       |      |        |        |   |      |     |    |    |    |    |      |      |      |      |   |   |   |   |   |
|-------|------|--------|--------|---|------|-----|----|----|----|----|------|------|------|------|---|---|---|---|---|
| b0480 | ushA | 504138 | 505790 | + | 1652 | 66  | 66 | 66 | 66 | 66 | 100% | 100% | 100% | 100% | P | P | P | P |   |
| b4585 | sroB | 506428 | 506509 | + | 81   | 3   | 2  | 2  | 3  | 3  | 67%  | 67%  | 100% | 100% | P | P | P | P | U |
| b0483 | ybaQ | 507442 | 507783 | + | 341  | 13  | 12 | 13 | 13 | 13 | 92%  | 100% | 100% | 100% | P | P | P | P | U |
| b0485 | ybaS | 510865 | 511797 | + | 932  | 37  | 37 | 37 | 37 | 37 | 100% | 100% | 100% | 100% | P | P | P | P | U |
| b0486 | ybaT | 511800 | 513092 | + | 1292 | 52  | 49 | 49 | 51 | 51 | 94%  | 94%  | 98%  | 98%  | P | P | P | P | U |
| b0487 | cueR | 513217 | 513624 | + | 407  | 16  | 16 | 16 | 16 | 16 | 100% | 100% | 100% | 100% | P | P | P | P |   |
| b0490 | ybbL | 515143 | 515820 | + | 677  | 27  | 25 | 25 | 25 | 26 | 93%  | 93%  | 93%  | 96%  | P | P | P | P | U |
| b0491 | ybbM | 515807 | 516586 | + | 779  | 31  | 18 | 18 | 18 | 18 | 58%  | 58%  | 58%  | 58%  | P | P | P | P | U |
| b0495 | ybbA | 518957 | 519643 | + | 686  | 28  | 26 | 26 | 26 | 26 | 93%  | 93%  | 93%  | 93%  | P | P | P | P | U |
| b0496 | ybbP | 519640 | 522054 | + | 2414 | 96  | 32 | 36 | 37 | 41 | 33%  | 38%  | 39%  | 43%  | P | P | P | P | U |
| b0497 | rhsD | 522485 | 526765 | + | 4280 | 172 | 30 | 32 | 41 | 43 | 17%  | 19%  | 24%  | 25%  | P | P | P | P | U |
| b0498 | ybbC | 526805 | 527173 | + | 368  | 15  | 3  | 6  | 6  | 9  | 20%  | 40%  | 40%  | 60%  | P | P | P | P | U |
| b0499 | ylbH | 527176 | 527883 | + | 707  | 28  | 4  | 5  | 6  | 6  | 14%  | 18%  | 21%  | 21%  | P | P | P | P | U |
| b0500 | ybbD | 527864 | 528354 | + | 490  | 20  | 1  | 1  | 1  | 1  | 5%   | 5%   | 5%   | 5%   | P | P | P | P | U |
| b4632 | ylbI | 528724 | 528816 | + | 92   | 4   | 1  | 1  | 1  | 1  | 25%  | 25%  | 25%  | 25%  | P | P | P | P | U |
| b0505 | allA | 531675 | 532157 | + | 482  | 19  | 4  | 4  | 4  | 4  | 21%  | 21%  | 21%  | 21%  | P | P | P | P |   |
| b0506 | allR | 532235 | 533050 | + | 815  | 33  | 33 | 33 | 33 | 33 | 100% | 100% | 100% | 100% | P | P | P | P |   |
| b0507 | gcl  | 533140 | 534921 | + | 1781 | 71  | 0  | 2  | 17 | 17 | 0%   | 3%   | 24%  | 24%  | A | P | P | P |   |
| b0508 | hyi  | 534934 | 535710 | + | 776  | 31  | 0  | 0  | 2  | 2  | 0%   | 0%   | 6%   | 6%   | A | A | P | P |   |
| b0509 | glxR | 535810 | 536688 | + | 878  | 35  | 0  | 0  | 1  | 1  | 0%   | 0%   | 3%   | 3%   | A | A | P | P |   |
| b0511 | ybbW | 536857 | 538311 | + | 1454 | 58  | 0  | 0  | 5  | 5  | 0%   | 0%   | 9%   | 9%   | A | A | P | P | U |
| b0512 | allB | 538371 | 539732 | + | 1361 | 54  | 0  | 0  | 11 | 11 | 0%   | 0%   | 20%  | 20%  | A | A | P | P |   |
| b0513 | ybbY | 539789 | 541090 | + | 1301 | 53  | 0  | 0  | 2  | 2  | 0%   | 0%   | 4%   | 4%   | A | A | P | P | U |
| b0514 | glxK | 541112 | 542257 | + | 1145 | 46  | 13 | 13 | 18 | 19 | 28%  | 28%  | 39%  | 41%  | P | P | P | P |   |
| b0518 | fdrA | 545904 | 547571 | + | 1667 | 67  | 0  | 0  | 0  | 0  | 0%   | 0%   | 0%   | 0%   | A | A | A | A | U |
| b4572 | ylbE | 547581 | 548839 | + | 1258 | 51  | 0  | 0  | 0  | 0  | 0%   | 0%   | 0%   | 0%   | A | A | A | A | U |
| b0520 | ylbF | 548850 | 549665 | + | 815  | 33  | 0  | 0  | 2  | 2  | 0%   | 0%   | 6%   | 6%   | A | A | P | P | U |
| b0521 | ybcF | 549662 | 550555 | + | 893  | 36  | 0  | 0  | 7  | 7  | 0%   | 0%   | 19%  | 19%  | A | A | P | P | U |
| b0526 | cysS | 553834 | 555219 | + | 1385 | 56  | 56 | 56 | 56 | 56 | 100% | 100% | 100% | 100% | P | P | P | P |   |
| b0530 | sfmA | 557435 | 557977 | + | 542  | 22  | 0  | 0  | 0  | 0  | 0%   | 0%   | 0%   | 0%   | A | A | A | A | U |
| b0531 | sfmC | 558197 | 558889 | + | 692  | 28  | 0  | 0  | 0  | 0  | 0%   | 0%   | 0%   | 0%   | A | A | A | A |   |
| b0532 | sfmD | 558920 | 561523 | + | 2603 | 104 | 0  | 2  | 7  | 7  | 0%   | 2%   | 7%   | 7%   | A | P | P | P | U |
| b0533 | sfmH | 561559 | 562542 | + | 983  | 40  | 0  | 0  | 0  | 0  | 0%   | 0%   | 0%   | 0%   | A | A | A | A | U |
| b0534 | sfmF | 562553 | 563068 | + | 515  | 21  | 0  | 0  | 0  | 0  | 0%   | 0%   | 0%   | 0%   | A | A | A | A | U |
| b0536 | argU | 563946 | 564022 | + | 76   | 3   | 3  | 3  | 3  | 3  | 100% | 100% | 100% | 100% | P | P | P | P |   |
| b4508 | peaD | 565599 | 565910 | + | 311  | 12  | 0  | 0  | 0  | 0  | 0%   | 0%   | 0%   | 0%   | A | A | A | A | U |
| b0542 | renD | 565907 | 565999 | + | 92   | 4   | 0  | 0  | 0  | 0  | 0%   | 0%   | 0%   | 0%   | A | A | A | A | U |
| b0540 | insE | 566056 | 566364 | + | 308  | 13  | 12 | 12 | 12 | 12 | 92%  | 92%  | 92%  | 92%  | P | P | P | P |   |
| b0541 | insF | 566361 | 567227 | + | 866  | 35  | 31 | 31 | 31 | 31 | 89%  | 89%  | 89%  | 89%  | P | P | P | P |   |
| b0542 | renD | 567258 | 567470 | + | 212  | 9   | 7  | 7  | 7  | 7  | 78%  | 78%  | 78%  | 78%  | P | P | P | P | U |
| b0543 | emrE | 567538 | 567870 | + | 332  | 14  | 12 | 12 | 12 | 12 | 86%  | 86%  | 86%  | 86%  | P | P | P | P |   |
| b0544 | ybcK | 568125 | 569651 | + | 1526 | 61  | 0  | 0  | 0  | 0  | 0%   | 0%   | 0%   | 0%   | A | A | A | A | U |
| b0545 | ybcL | 570116 | 570667 | + | 551  | 23  | 1  | 1  | 13 | 14 | 4%   | 4%   | 57%  | 61%  | P | P | P | P | U |
| b0546 | ybcM | 570677 | 571474 | + | 797  | 32  | 8  | 15 | 19 | 26 | 25%  | 47%  | 59%  | 81%  | P | P | P | P | U |
| b4588 | ylcH | 571591 | 571692 | + | 101  | 5   | 0  | 1  | 1  | 1  | 0%   | 20%  | 20%  | 20%  | A | P | P | P | U |
| b0547 | ybcN | 571689 | 572144 | + | 455  | 19  | 0  | 0  | 0  | 0  | 0%   | 0%   | 0%   | 0%   | A | A | A | A | U |

|       |      |        |        |   |      |     |    |    |    |     |      |      |      |      |   |   |   |   |   |
|-------|------|--------|--------|---|------|-----|----|----|----|-----|------|------|------|------|---|---|---|---|---|
| b0548 | ninE | 572144 | 572314 | + | 170  | 6   | 0  | 0  | 0  | 0   | 0%   | 0%   | 0%   | 0%   | A | A | A | A | U |
| b0549 | ybcO | 572307 | 572597 | + | 290  | 12  | 0  | 0  | 0  | 0   | 0%   | 0%   | 0%   | 0%   | A | A | A | A | U |
| b0550 | rusA | 572594 | 572956 | + | 362  | 14  | 0  | 0  | 2  | 2   | 0%   | 0%   | 14%  | 14%  | A | A | P | P |   |
| b4509 | ylcG | 572953 | 573093 | + | 140  | 6   | 0  | 0  | 0  | 0   | 0%   | 0%   | 0%   | 0%   | A | A | A | A | U |
| b0551 | quuD | 573179 | 573562 | + | 383  | 15  | 0  | 0  | 1  | 1   | 0%   | 0%   | 7%   | 7%   | A | A | P | P | U |
| b0554 | essD | 576621 | 576836 | + | 215  | 9   | 0  | 0  | 2  | 2   | 0%   | 0%   | 22%  | 22%  | A | A | P | P | U |
| b0555 | arrD | 576836 | 577333 | + | 497  | 20  | 0  | 0  | 2  | 2   | 0%   | 0%   | 10%  | 10%  | A | A | P | P | U |
| b0556 | rzpD | 577330 | 577791 | + | 461  | 18  | 0  | 0  | 0  | 0   | 0%   | 0%   | 0%   | 0%   | A | A | A | A | U |
| b4510 | rzoD | 577550 | 577732 | + | 182  | 7   | 0  | 0  | 0  | 0   | 0%   | 0%   | 0%   | 0%   | A | A | A | A | U |
| b0559 | ybcW | 579103 | 579309 | + | 206  | 9   | 0  | 3  | 3  | 3   | 0%   | 33%  | 33%  | 33%  | A | P | P | P | U |
| b0560 | nohB | 580057 | 580602 | + | 545  | 22  | 0  | 0  | 0  | 0   | 0%   | 0%   | 0%   | 0%   | A | A | A | A |   |
| b4634 | aaaD | 580577 | 580885 | + | 308  | 12  | 0  | 0  | 2  | 2   | 0%   | 0%   | 17%  | 17%  | A | A | P | P | U |
| b0561 | tfaD | 580883 | 581320 | + | 437  | 18  | 0  | 0  | 1  | 1   | 0%   | 0%   | 6%   | 6%   | A | A | P | P | U |
| b0563 | tfaX | 582176 | 582358 | + | 182  | 7   | 0  | 0  | 0  | 0   | 0%   | 0%   | 0%   | 0%   | A | A | A | A | U |
| b0564 | appY | 582904 | 583653 | + | 749  | 30  | 14 | 14 | 15 | 17  | 47%  | 47%  | 50%  | 57%  | P | P | P | P |   |
| b4635 | pauD | 585280 | 585324 | + | 44   | 2   | 2  | 2  | 2  | 2   | 100% | 100% | 100% | 100% | P | P | P | P |   |
| b0572 | cusC | 594823 | 596196 | + | 1373 | 55  | 0  | 0  | 0  | 0   | 0%   | 0%   | 0%   | 0%   | A | A | A | A |   |
| b0573 | cusF | 596354 | 596686 | + | 332  | 13  | 0  | 4  | 4  | 4   | 0%   | 31%  | 31%  | 31%  | A | P | P | P |   |
| b0574 | cusB | 596702 | 597925 | + | 1223 | 49  | 0  | 0  | 1  | 1   | 0%   | 0%   | 2%   | 2%   | A | A | P | P |   |
| b0575 | cusA | 597937 | 601080 | + | 3143 | 126 | 0  | 0  | 10 | 11  | 0%   | 0%   | 8%   | 9%   | A | A | P | P |   |
| b0576 | pheP | 601182 | 602558 | + | 1376 | 55  | 39 | 39 | 39 | 39  | 71%  | 71%  | 71%  | 71%  | P | P | P | P |   |
| b4415 | hokE | 607059 | 607211 | + | 152  | 6   | 0  | 0  | 0  | 0   | 0%   | 0%   | 0%   | 0%   | A | A | A | A | U |
| b0582 | insL | 607288 | 608400 | + | 1112 | 45  | 45 | 45 | 45 | 45  | 100% | 100% | 100% | 100% | P | P | P | P |   |
| b0585 | fes  | 612038 | 613162 | + | 1124 | 45  | 2  | 2  | 17 | 45  | 4%   | 4%   | 38%  | 100% | P | P | P | P |   |
| b4511 | ybdZ | 613165 | 613383 | + | 218  | 9   | 1  | 1  | 1  | 9   | 11%  | 11%  | 11%  | 100% | P | P | P | P | U |
| b0586 | entF | 613380 | 617261 | + | 3881 | 155 | 18 | 34 | 41 | 151 | 12%  | 22%  | 26%  | 97%  | P | P | P | P |   |
| b0587 | fepE | 617477 | 618610 | + | 1133 | 45  | 0  | 0  | 0  | 0   | 0%   | 0%   | 0%   | 0%   | A | A | A | A |   |
| b0591 | entS | 621523 | 622773 | + | 1250 | 50  | 5  | 5  | 5  | 31  | 10%  | 10%  | 10%  | 62%  | P | P | P | P | U |
| b0593 | entC | 624108 | 625283 | + | 1175 | 47  | 14 | 14 | 28 | 47  | 30%  | 30%  | 60%  | 100% | P | P | P | P |   |
| b0594 | entE | 625293 | 626903 | + | 1610 | 65  | 19 | 19 | 34 | 65  | 29%  | 29%  | 52%  | 100% | P | P | P | P |   |
| b0595 | entB | 626917 | 627774 | + | 857  | 35  | 14 | 14 | 22 | 35  | 40%  | 40%  | 63%  | 100% | P | P | P | P |   |
| b0596 | entA | 627774 | 628520 | + | 746  | 29  | 11 | 11 | 12 | 29  | 38%  | 38%  | 41%  | 100% | P | P | P | P |   |
| b0597 | ybdB | 628523 | 628936 | + | 413  | 16  | 6  | 6  | 8  | 16  | 38%  | 38%  | 50%  | 100% | P | P | P | P | U |
| b0598 | cstA | 629117 | 631222 | + | 2105 | 85  | 85 | 85 | 85 | 85  | 100% | 100% | 100% | 100% | P | P | P | P |   |
| b4512 | ybdD | 631405 | 631602 | + | 197  | 8   | 7  | 7  | 8  | 8   | 88%  | 88%  | 100% | 100% | P | P | P | P | U |
| b0600 | ybdL | 632809 | 633969 | + | 1160 | 46  | 41 | 44 | 44 | 44  | 89%  | 96%  | 96%  | 96%  | P | P | P | P |   |
| b0605 | ahpC | 638168 | 638731 | + | 563  | 23  | 23 | 23 | 23 | 23  | 100% | 100% | 100% | 100% | P | P | P | P |   |
| b0606 | ahpF | 638976 | 640541 | + | 1565 | 62  | 62 | 62 | 62 | 62  | 100% | 100% | 100% | 100% | P | P | P | P |   |
| b0608 | ybdR | 641311 | 642549 | + | 1238 | 49  | 17 | 18 | 19 | 38  | 35%  | 37%  | 39%  | 78%  | P | P | P | P | U |
| b0619 | dpiB | 651458 | 653116 | + | 1658 | 66  | 24 | 25 | 25 | 25  | 36%  | 38%  | 38%  | 38%  | P | P | P | P |   |
| b0620 | dpiA | 653085 | 653765 | + | 680  | 27  | 15 | 18 | 18 | 18  | 56%  | 67%  | 67%  | 67%  | P | P | P | P |   |
| b0622 | pagP | 655780 | 656340 | + | 560  | 22  | 0  | 3  | 3  | 5   | 0%   | 14%  | 14%  | 23%  | A | P | P | P |   |
| b0623 | cspE | 656515 | 656724 | + | 209  | 9   | 9  | 9  | 9  | 9   | 100% | 100% | 100% | 100% | P | P | P | P |   |
| b4581 | ybeM | 657254 | 658041 | + | 787  | 31  | 21 | 21 | 30 | 30  | 68%  | 68%  | 97%  | 97%  | P | P | P | P | U |
| b0627 | tatE | 658170 | 658373 | + | 203  | 8   | 8  | 8  | 8  | 8   | 100% | 100% | 100% | 100% | P | P | P | P |   |
| b0643 | ybeL | 674241 | 674723 | + | 482  | 19  | 19 | 19 | 19 | 19  | 100% | 100% | 100% | 100% | P | P | P | P | U |



|       |      |        |        |   |      |     |     |     |     |     |      |      |      |      |   |   |   |   |   |
|-------|------|--------|--------|---|------|-----|-----|-----|-----|-----|------|------|------|------|---|---|---|---|---|
| b0645 | ybeR | 675934 | 676641 | + | 707  | 28  | 0   | 0   | 1   | 1   | 0%   | 0%   | 4%   | 4%   | A | A | P | P | U |
| b0646 | djIB | 676638 | 678065 | + | 1427 | 57  | 0   | 0   | 4   | 4   | 0%   | 0%   | 7%   | 7%   | A | A | P | P | U |
| b0648 | ybeU | 678731 | 679438 | + | 707  | 28  | 0   | 0   | 0   | 0   | 0%   | 0%   | 0%   | 0%   | A | A | A | A | U |
| b0649 | djIC | 679435 | 680886 | + | 1451 | 58  | 0   | 0   | 0   | 0   | 0%   | 0%   | 0%   | 0%   | A | A | A | A |   |
| b0662 | ubiF | 694324 | 695499 | + | 1175 | 47  | 47  | 47  | 47  | 47  | 100% | 100% | 100% | 100% | P | P | P | P |   |
| b0679 | nagE | 703167 | 705113 | + | 1946 | 78  | 73  | 73  | 76  | 76  | 94%  | 94%  | 97%  | 97%  | P | P | P | P |   |
| b0680 | glnS | 705316 | 706980 | + | 1664 | 67  | 67  | 67  | 67  | 67  | 100% | 100% | 100% | 100% | P | P | P | P |   |
| b0681 | ybfM | 707557 | 708963 | + | 1406 | 56  | 0   | 0   | 0   | 0   | 0%   | 0%   | 0%   | 0%   | A | A | A | A | U |
| b0682 | ybfN | 709013 | 709339 | + | 326  | 13  | 0   | 0   | 0   | 0   | 0%   | 0%   | 0%   | 0%   | A | A | A | A | U |
| b0687 | seqA | 712210 | 712755 | + | 545  | 22  | 22  | 22  | 22  | 22  | 100% | 100% | 100% | 100% | P | P | P | P |   |
| b0688 | pgm  | 712781 | 714421 | + | 1640 | 65  | 65  | 65  | 65  | 65  | 100% | 100% | 100% | 100% | P | P | P | P |   |
| b0689 | ybfP | 714635 | 715129 | + | 494  | 19  | 0   | 0   | 0   | 0   | 0%   | 0%   | 0%   | 0%   | A | A | A | A | U |
| b4590 | ybfK | 719806 | 720063 | + | 257  | 10  | 0   | 0   | 0   | 0   | 0%   | 0%   | 0%   | 0%   | A | A | A | A | U |
| b0699 | ybfA | 728357 | 728563 | + | 206  | 8   | 8   | 8   | 8   | 8   | 100% | 100% | 100% | 100% | P | P | P | P | U |
| b0700 | rhcC | 728806 | 732999 | + | 4193 | 167 | 42  | 46  | 55  | 57  | 25%  | 28%  | 33%  | 34%  | P | P | P | P |   |
| b0702 | ybfB | 732999 | 733325 | + | 326  | 13  | 0   | 0   | 1   | 1   | 0%   | 0%   | 8%   | 8%   | A | A | P | P | U |
| b0703 | ybfO | 733356 | 734876 | + | 1520 | 60  | 16  | 17  | 23  | 23  | 27%  | 28%  | 38%  | 38%  | P | P | P | P | U |
| b0704 | ybfC | 734873 | 735442 | + | 569  | 23  | 0   | 0   | 1   | 2   | 0%   | 0%   | 4%   | 9%   | A | A | P | P | U |
| b4514 | ybfQ | 735668 | 735922 | + | 254  | 10  | 0   | 0   | 0   | 0   | 0%   | 0%   | 0%   | 0%   | A | A | A | A | U |
| b0705 | ybfL | 736048 | 737184 | + | 1136 | 46  | 0   | 0   | 0   | 0   | 0%   | 0%   | 0%   | 0%   | A | A | A | A | U |
| b0706 | ybfD | 737315 | 738076 | + | 761  | 30  | 0   | 0   | 0   | 0   | 0%   | 0%   | 0%   | 0%   | A | A | A | A | U |
| b0707 | ybgA | 738224 | 738733 | + | 509  | 21  | 18  | 18  | 18  | 20  | 86%  | 86%  | 86%  | 95%  | P | P | P | P | U |
| b0708 | phr  | 738730 | 740148 | + | 1418 | 57  | 35  | 35  | 36  | 38  | 61%  | 61%  | 63%  | 67%  | P | P | P | P |   |
| b0710 | ybgI | 742050 | 742793 | + | 743  | 30  | 30  | 30  | 30  | 30  | 100% | 100% | 100% | 100% | P | P | P | P | U |
| b0711 | ybgJ | 742816 | 743472 | + | 656  | 26  | 26  | 26  | 26  | 26  | 100% | 100% | 100% | 100% | P | P | P | P | U |
| b0712 | ybgK | 743466 | 744398 | + | 932  | 37  | 37  | 37  | 37  | 37  | 100% | 100% | 100% | 100% | P | P | P | P | U |
| b0713 | ybgL | 744388 | 745122 | + | 734  | 29  | 28  | 28  | 28  | 28  | 97%  | 97%  | 97%  | 97%  | P | P | P | P | U |
| b0714 | nei  | 745158 | 745949 | + | 791  | 32  | 29  | 29  | 29  | 29  | 91%  | 91%  | 91%  | 91%  | P | P | P | P |   |
| b0721 | sdhC | 754400 | 754789 | + | 389  | 16  | 16  | 16  | 16  | 16  | 100% | 100% | 100% | 100% | P | P | P | P |   |
| b0722 | sdhD | 754783 | 755130 | + | 347  | 14  | 14  | 14  | 14  | 14  | 100% | 100% | 100% | 100% | P | P | P | P |   |
| b0723 | sdhA | 755130 | 756896 | + | 1766 | 71  | 71  | 71  | 71  | 71  | 100% | 100% | 100% | 100% | P | P | P | P |   |
| b0724 | sdhB | 756912 | 757628 | + | 716  | 28  | 28  | 28  | 28  | 28  | 100% | 100% | 100% | 100% | P | P | P | P |   |
| b0726 | sucA | 757929 | 760730 | + | 2801 | 112 | 112 | 112 | 112 | 112 | 100% | 100% | 100% | 100% | P | P | P | P |   |
| b0727 | sucB | 760745 | 761962 | + | 1217 | 49  | 49  | 49  | 49  | 49  | 100% | 100% | 100% | 100% | P | P | P | P |   |
| b0728 | sucC | 762237 | 763403 | + | 1166 | 46  | 46  | 46  | 46  | 46  | 100% | 100% | 100% | 100% | P | P | P | P |   |
| b0729 | sucD | 763403 | 764272 | + | 869  | 35  | 35  | 35  | 35  | 35  | 100% | 100% | 100% | 100% | P | P | P | P |   |
| b0731 | mngA | 765207 | 767183 | + | 1976 | 80  | 0   | 3   | 9   | 10  | 0%   | 4%   | 11%  | 13%  | A | P | P | P |   |
| b0732 | mngB | 767201 | 769834 | + | 2633 | 106 | 17  | 21  | 23  | 23  | 16%  | 20%  | 22%  | 22%  | P | P | P | P |   |
| b0733 | cydA | 770681 | 772249 | + | 1568 | 63  | 63  | 63  | 63  | 63  | 100% | 100% | 100% | 100% | P | P | P | P |   |
| b0734 | cydB | 772265 | 773404 | + | 1139 | 45  | 45  | 45  | 45  | 45  | 100% | 100% | 100% | 100% | P | P | P | P |   |
| b4515 | ybgT | 773419 | 773532 | + | 113  | 4   | 4   | 4   | 4   | 4   | 100% | 100% | 100% | 100% | P | P | P | P | U |
| b0735 | ybgE | 773532 | 773825 | + | 293  | 12  | 10  | 11  | 11  | 11  | 83%  | 92%  | 92%  | 92%  | P | P | P | P | U |
| b0736 | ybgC | 773975 | 774379 | + | 404  | 16  | 16  | 16  | 16  | 16  | 100% | 100% | 100% | 100% | P | P | P | P | U |
| b0737 | tolQ | 774376 | 775068 | + | 692  | 28  | 28  | 28  | 28  | 28  | 100% | 100% | 100% | 100% | P | P | P | P |   |
| b0738 | tolR | 775072 | 775500 | + | 428  | 17  | 17  | 17  | 17  | 17  | 100% | 100% | 100% | 100% | P | P | P | P |   |
| b0739 | tolA | 775565 | 776830 | + | 1265 | 50  | 49  | 49  | 49  | 49  | 98%  | 98%  | 98%  | 98%  | P | P | P | P |   |

|       |      |        |        |   |      |    |    |    |    |    |      |      |      |      |   |   |   |   |   |
|-------|------|--------|--------|---|------|----|----|----|----|----|------|------|------|------|---|---|---|---|---|
| b0740 | tolB | 776963 | 778255 | + | 1292 | 51 | 51 | 51 | 51 | 51 | 100% | 100% | 100% | 100% | P | P | P | P |   |
| b0741 | pal  | 778290 | 778811 | + | 521  | 21 | 21 | 21 | 21 | 21 | 100% | 100% | 100% | 100% | P | P | P | P |   |
| b0742 | ybgF | 778821 | 779612 | + | 791  | 32 | 32 | 32 | 32 | 32 | 100% | 100% | 100% | 100% | P | P | P | P | U |
| b0743 | lysT | 779777 | 779852 | + | 75   | 3  | 3  | 3  | 3  | 3  | 100% | 100% | 100% | 100% | P | P | P | P |   |
| b0744 | valT | 779988 | 780063 | + | 75   | 3  | 3  | 3  | 3  | 3  | 100% | 100% | 100% | 100% | P | P | P | P |   |
| b0745 | lysW | 780066 | 780141 | + | 75   | 3  | 3  | 3  | 3  | 3  | 100% | 100% | 100% | 100% | P | P | P | P |   |
| b0746 | valZ | 780291 | 780366 | + | 75   | 3  | 3  | 3  | 3  | 3  | 100% | 100% | 100% | 100% | P | P | P | P |   |
| b0747 | lysY | 780370 | 780445 | + | 75   | 3  | 3  | 3  | 3  | 3  | 100% | 100% | 100% | 100% | P | P | P | P |   |
| b0748 | lysZ | 780592 | 780667 | + | 75   | 3  | 3  | 3  | 3  | 3  | 100% | 100% | 100% | 100% | P | P | P | P |   |
| b0749 | lysQ | 780800 | 780875 | + | 75   | 3  | 3  | 3  | 3  | 3  | 100% | 100% | 100% | 100% | P | P | P | P |   |
| b0750 | nadA | 781308 | 782351 | + | 1043 | 42 | 42 | 42 | 42 | 42 | 100% | 100% | 100% | 100% | P | P | P | P |   |
| b0751 | pnuC | 782389 | 783108 | + | 719  | 29 | 29 | 29 | 29 | 29 | 100% | 100% | 100% | 100% | P | P | P | P | U |
| b0754 | aroG | 784856 | 785908 | + | 1052 | 43 | 43 | 43 | 43 | 43 | 100% | 100% | 100% | 100% | P | P | P | P |   |
| b0762 | ybhT | 793996 | 794145 | + | 149  | 6  | 6  | 6  | 6  | 6  | 100% | 100% | 100% | 100% | P | P | P | P | U |
| b0763 | modA | 794312 | 795085 | + | 773  | 31 | 30 | 30 | 30 | 31 | 97%  | 97%  | 97%  | 100% | P | P | P | P |   |
| b0764 | modB | 795085 | 795774 | + | 689  | 27 | 21 | 21 | 21 | 26 | 78%  | 78%  | 78%  | 96%  | P | P | P | P |   |
| b0765 | modC | 795777 | 796835 | + | 1058 | 43 | 28 | 28 | 28 | 34 | 65%  | 65%  | 65%  | 79%  | P | P | P | P |   |
| b0767 | pgl  | 797809 | 798804 | + | 995  | 39 | 39 | 39 | 39 | 39 | 100% | 100% | 100% | 100% | P | P | P | P |   |
| b0769 | ybhH | 799982 | 801034 | + | 1052 | 43 | 0  | 0  | 0  | 0  | 0%   | 0%   | 0%   | 0%   | A | A | A | A | U |
| b0770 | ybhI | 801110 | 802543 | + | 1433 | 57 | 0  | 1  | 5  | 5  | 0%   | 2%   | 9%   | 9%   | A | P | P | P | U |
| b0771 | ybhJ | 802726 | 804987 | + | 2261 | 91 | 0  | 3  | 4  | 4  | 0%   | 3%   | 4%   | 4%   | A | P | P | P | U |
| b0775 | bioB | 808567 | 809607 | + | 1040 | 42 | 42 | 42 | 42 | 42 | 100% | 100% | 100% | 100% | P | P | P | P |   |
| b0776 | bioF | 809604 | 810758 | + | 1154 | 47 | 47 | 47 | 47 | 47 | 100% | 100% | 100% | 100% | P | P | P | P |   |
| b0777 | bioC | 810745 | 811500 | + | 755  | 30 | 30 | 30 | 30 | 30 | 100% | 100% | 100% | 100% | P | P | P | P | U |
| b0778 | bioD | 811493 | 812170 | + | 677  | 27 | 27 | 27 | 27 | 27 | 100% | 100% | 100% | 100% | P | P | P | P |   |
| b0779 | uvrB | 812749 | 814770 | + | 2021 | 81 | 80 | 80 | 80 | 80 | 99%  | 99%  | 99%  | 99%  | P | P | P | P |   |
| b0781 | moaA | 816267 | 817256 | + | 989  | 39 | 39 | 39 | 39 | 39 | 100% | 100% | 100% | 100% | P | P | P | P |   |
| b0782 | moaB | 817278 | 817790 | + | 512  | 21 | 21 | 21 | 21 | 21 | 100% | 100% | 100% | 100% | P | P | P | P |   |
| b0783 | moaC | 817793 | 818278 | + | 485  | 19 | 19 | 19 | 19 | 19 | 100% | 100% | 100% | 100% | P | P | P | P |   |
| b0784 | moaD | 818271 | 818516 | + | 245  | 10 | 10 | 10 | 10 | 10 | 100% | 100% | 100% | 100% | P | P | P | P |   |
| b0785 | moaE | 818518 | 818970 | + | 452  | 18 | 17 | 17 | 17 | 17 | 94%  | 94%  | 94%  | 94%  | P | P | P | P |   |
| b0786 | ybhL | 819107 | 819811 | + | 704  | 28 | 28 | 28 | 28 | 28 | 100% | 100% | 100% | 100% | P | P | P | P | U |
| b0787 | ybhM | 820016 | 820729 | + | 713  | 28 | 0  | 1  | 1  | 2  | 0%   | 4%   | 4%   | 7%   | A | P | P | P | U |
| b0791 | ybhQ | 823853 | 824263 | + | 410  | 16 | 12 | 12 | 15 | 15 | 75%  | 75%  | 94%  | 94%  | P | P | P | P | U |
| b0797 | rhIE | 830095 | 831459 | + | 1364 | 54 | 42 | 42 | 42 | 42 | 78%  | 78%  | 78%  | 78%  | P | P | P | P |   |
| b0799 | dinG | 832293 | 834443 | + | 2150 | 85 | 28 | 28 | 31 | 33 | 33%  | 33%  | 36%  | 39%  | P | P | P | P |   |
| b0800 | ybiB | 834471 | 835433 | + | 962  | 39 | 38 | 38 | 38 | 39 | 97%  | 97%  | 97%  | 100% | P | P | P | P | U |
| b0801 | ybiC | 835574 | 836659 | + | 1085 | 43 | 43 | 43 | 43 | 43 | 100% | 100% | 100% | 100% | P | P | P | P | U |
| b0807 | rlmF | 841555 | 842481 | + | 926  | 37 | 33 | 33 | 33 | 33 | 89%  | 89%  | 89%  | 89%  | P | P | P | P | U |
| b0814 | ompX | 849673 | 850188 | + | 515  | 20 | 20 | 20 | 20 | 20 | 100% | 100% | 100% | 100% | P | P | P | P |   |
| b0816 | yliL | 851894 | 852163 | + | 269  | 11 | 0  | 0  | 0  | 0  | 0%   | 0%   | 0%   | 0%   | A | A | A | A | U |
| b0817 | mntR | 852406 | 852873 | + | 467  | 19 | 19 | 19 | 19 | 19 | 100% | 100% | 100% | 100% | P | P | P | P |   |
| b0818 | ybiR | 852870 | 853988 | + | 1118 | 45 | 37 | 37 | 37 | 37 | 82%  | 82%  | 82%  | 82%  | P | P | P | P | U |
| b0820 | ybiT | 855186 | 856778 | + | 1592 | 64 | 62 | 62 | 62 | 62 | 97%  | 97%  | 97%  | 97%  | P | P | P | P | U |
| b0825 | fsaA | 862865 | 863527 | + | 662  | 27 | 9  | 11 | 12 | 16 | 33%  | 41%  | 44%  | 59%  | P | P | P | P |   |
| b0828 | iaaA | 865791 | 866756 | + | 965  | 39 | 39 | 39 | 39 | 39 | 100% | 100% | 100% | 100% | P | P | P | P |   |

|       |      |        |        |   |      |     |     |     |     |     |      |      |      |      |   |   |   |   |   |
|-------|------|--------|--------|---|------|-----|-----|-----|-----|-----|------|------|------|------|---|---|---|---|---|
| b0829 | gsiA | 866743 | 868614 | + | 1871 | 75  | 75  | 75  | 75  | 75  | 100% | 100% | 100% | 100% | P | P | P | P | U |
| b0830 | gsiB | 868634 | 870172 | + | 1538 | 61  | 60  | 60  | 60  | 61  | 98%  | 98%  | 98%  | 100% | P | P | P | P | U |
| b0831 | gsiC | 870190 | 871110 | + | 920  | 37  | 35  | 35  | 35  | 36  | 95%  | 95%  | 95%  | 97%  | P | P | P | P | U |
| b0832 | gsiD | 871113 | 872024 | + | 911  | 36  | 32  | 32  | 32  | 33  | 89%  | 89%  | 89%  | 92%  | P | P | P | P | U |
| b0833 | yliE | 872202 | 874550 | + | 2348 | 94  | 84  | 84  | 84  | 84  | 89%  | 89%  | 89%  | 89%  | P | P | P | P | U |
| b0834 | yliF | 874558 | 875886 | + | 1328 | 53  | 47  | 47  | 47  | 47  | 89%  | 89%  | 89%  | 89%  | P | P | P | P | U |
| b0836 | bssR | 877471 | 877854 | + | 383  | 16  | 7   | 16  | 16  | 16  | 44%  | 100% | 100% | 100% | P | P | P | P | U |
| b0837 | yliI | 877965 | 879080 | + | 1115 | 45  | 14  | 14  | 24  | 34  | 31%  | 31%  | 53%  | 76%  | P | P | P | P | U |
| b0839 | dacC | 879950 | 881152 | + | 1202 | 48  | 47  | 48  | 48  | 48  | 98%  | 100% | 100% | 100% | P | P | P | P |   |
| b0842 | cmr  | 882896 | 884128 | + | 1232 | 49  | 41  | 41  | 49  | 49  | 84%  | 84%  | 100% | 100% | P | P | P | P |   |
| b0846 | ybjK | 886646 | 887182 | + | 536  | 21  | 3   | 3   | 9   | 9   | 14%  | 14%  | 43%  | 43%  | P | P | P | P | U |
| b0848 | ybjM | 889312 | 889689 | + | 377  | 15  | 3   | 9   | 9   | 9   | 20%  | 60%  | 60%  | 60%  | P | P | P | P | U |
| b0850 | ybjC | 890136 | 890423 | + | 287  | 11  | 11  | 11  | 11  | 11  | 100% | 100% | 100% | 100% | P | P | P | P | U |
| b0851 | nfsA | 890407 | 891129 | + | 722  | 29  | 29  | 29  | 29  | 29  | 100% | 100% | 100% | 100% | P | P | P | P |   |
| b0852 | rimK | 891190 | 892092 | + | 902  | 36  | 32  | 32  | 32  | 32  | 89%  | 89%  | 89%  | 89%  | P | P | P | P |   |
| b0853 | ybjN | 892180 | 892656 | + | 476  | 19  | 18  | 18  | 18  | 18  | 95%  | 95%  | 95%  | 95%  | P | P | P | P | U |
| b0854 | potF | 893007 | 894119 | + | 1112 | 44  | 44  | 44  | 44  | 44  | 100% | 100% | 100% | 100% | P | P | P | P |   |
| b0855 | potG | 894214 | 895347 | + | 1133 | 45  | 45  | 45  | 45  | 45  | 100% | 100% | 100% | 100% | P | P | P | P |   |
| b0856 | potH | 895357 | 896310 | + | 953  | 39  | 29  | 29  | 29  | 37  | 74%  | 74%  | 74%  | 95%  | P | P | P | P |   |
| b0857 | potI | 896307 | 897152 | + | 845  | 34  | 26  | 27  | 28  | 31  | 76%  | 79%  | 82%  | 91%  | P | P | P | P |   |
| b0858 | ybjO | 897212 | 897700 | + | 488  | 19  | 16  | 16  | 16  | 16  | 84%  | 84%  | 84%  | 84%  | P | P | P | P | U |
| b0859 | rumB | 897741 | 898868 | + | 1127 | 45  | 27  | 27  | 27  | 27  | 60%  | 60%  | 60%  | 60%  | P | P | P | P |   |
| b0866 | ybjQ | 903816 | 904139 | + | 323  | 13  | 13  | 13  | 13  | 13  | 100% | 100% | 100% | 100% | P | P | P | P | U |
| b0867 | amiD | 904136 | 904966 | + | 830  | 33  | 32  | 32  | 33  | 33  | 97%  | 97%  | 100% | 100% | P | P | P | P | U |
| b0876 | ybjD | 915696 | 917354 | + | 1658 | 66  | 43  | 43  | 53  | 53  | 65%  | 65%  | 80%  | 80%  | P | P | P | P | U |
| b0878 | macA | 918458 | 919573 | + | 1115 | 45  | 45  | 45  | 45  | 45  | 100% | 100% | 100% | 100% | P | P | P | P |   |
| b0879 | macB | 919570 | 921516 | + | 1946 | 78  | 68  | 70  | 70  | 70  | 87%  | 90%  | 90%  | 90%  | P | P | P | P |   |
| b0881 | clpS | 922136 | 922456 | + | 320  | 12  | 12  | 12  | 12  | 12  | 100% | 100% | 100% | 100% | P | P | P | P |   |
| b0882 | clpA | 922487 | 924763 | + | 2276 | 90  | 90  | 90  | 90  | 90  | 100% | 100% | 100% | 100% | P | P | P | P |   |
| b0889 | lrp  | 931818 | 932312 | + | 494  | 20  | 20  | 20  | 20  | 20  | 100% | 100% | 100% | 100% | P | P | P | P |   |
| b0890 | ftsK | 932447 | 936436 | + | 3989 | 160 | 159 | 159 | 159 | 159 | 99%  | 99%  | 99%  | 99%  | P | P | P | P |   |
| b0891 | lolA | 936595 | 937206 | + | 611  | 24  | 24  | 24  | 24  | 24  | 100% | 100% | 100% | 100% | P | P | P | P |   |
| b0892 | rarA | 937217 | 938560 | + | 1343 | 54  | 51  | 51  | 51  | 52  | 94%  | 94%  | 94%  | 96%  | P | P | P | P |   |
| b0893 | serS | 938651 | 939943 | + | 1292 | 52  | 49  | 49  | 49  | 52  | 94%  | 94%  | 94%  | 100% | P | P | P | P |   |
| b0894 | dmsA | 940182 | 942626 | + | 2444 | 98  | 6   | 66  | 66  | 66  | 6%   | 67%  | 67%  | 67%  | P | P | P | P |   |
| b0895 | dmsB | 942637 | 943254 | + | 617  | 24  | 1   | 13  | 13  | 13  | 4%   | 54%  | 54%  | 54%  | P | P | P | P |   |
| b0896 | dmsC | 943256 | 944119 | + | 863  | 35  | 0   | 15  | 15  | 15  | 0%   | 43%  | 43%  | 43%  | A | P | P | P |   |
| b0898 | ycaD | 945094 | 946242 | + | 1148 | 46  | 42  | 42  | 42  | 42  | 91%  | 91%  | 91%  | 91%  | P | P | P | P | U |
| b0899 | ycaM | 946452 | 947882 | + | 1430 | 57  | 0   | 0   | 5   | 5   | 0%   | 0%   | 9%   | 9%   | A | A | P | P | U |
| b0901 | ycaK | 948891 | 949481 | + | 590  | 23  | 8   | 8   | 8   | 10  | 35%  | 35%  | 35%  | 43%  | P | P | P | P | U |
| b0906 | ycaP | 955985 | 956677 | + | 692  | 28  | 20  | 22  | 28  | 28  | 71%  | 79%  | 100% | 100% | P | P | P | P | U |
| b0907 | serC | 956876 | 957964 | + | 1088 | 44  | 44  | 44  | 44  | 44  | 100% | 100% | 100% | 100% | P | P | P | P |   |
| b0908 | aroA | 958035 | 959318 | + | 1283 | 52  | 52  | 52  | 52  | 52  | 100% | 100% | 100% | 100% | P | P | P | P |   |
| b0909 | ycaL | 959487 | 960251 | + | 764  | 30  | 0   | 0   | 11  | 11  | 0%   | 0%   | 37%  | 37%  | A | A | P | P | U |
| b0910 | cmk  | 960424 | 961107 | + | 683  | 27  | 27  | 27  | 27  | 27  | 100% | 100% | 100% | 100% | P | P | P | P |   |
| b0911 | rpsA | 961218 | 962891 | + | 1673 | 67  | 67  | 67  | 67  | 67  | 100% | 100% | 100% | 100% | P | P | P | P |   |

|       |      |         |         |   |      |     |     |     |     |     |      |      |      |      |   |   |   |   |   |
|-------|------|---------|---------|---|------|-----|-----|-----|-----|-----|------|------|------|------|---|---|---|---|---|
| b0912 | ihfB | 963051  | 963335  | + | 284  | 11  | 11  | 11  | 11  | 11  | 100% | 100% | 100% | 100% | P | P | P | P |   |
| b0913 | ycaI | 963543  | 965807  | + | 2264 | 90  | 0   | 0   | 11  | 11  | 0%   | 0%   | 12%  | 12%  | A | A | P | P | U |
| b0914 | msbA | 965844  | 967592  | + | 1748 | 70  | 69  | 69  | 69  | 69  | 99%  | 99%  | 99%  | 99%  | P | P | P | P |   |
| b0915 | lpxK | 967589  | 968575  | + | 986  | 39  | 33  | 33  | 33  | 33  | 85%  | 85%  | 85%  | 85%  | P | P | P | P |   |
| b0916 | ycaQ | 968612  | 969844  | + | 1232 | 50  | 13  | 13  | 14  | 14  | 26%  | 26%  | 28%  | 28%  | P | P | P | P | U |
| b0917 | ycaR | 969896  | 970078  | + | 182  | 7   | 7   | 7   | 7   | 7   | 100% | 100% | 100% | 100% | P | P | P | P | U |
| b0918 | kdsB | 970075  | 970821  | + | 746  | 30  | 27  | 27  | 27  | 27  | 90%  | 90%  | 90%  | 90%  | P | P | P | P |   |
| b0919 | ycbJ | 970975  | 971868  | + | 893  | 36  | 11  | 30  | 30  | 34  | 31%  | 83%  | 83%  | 94%  | P | P | P | P | U |
| b0921 | smtA | 972760  | 973545  | + | 785  | 32  | 32  | 32  | 32  | 32  | 100% | 100% | 100% | 100% | P | P | P | P | U |
| b0922 | mukF | 973542  | 974864  | + | 1322 | 53  | 52  | 52  | 52  | 52  | 98%  | 98%  | 98%  | 98%  | P | P | P | P |   |
| b0923 | mukE | 974872  | 975549  | + | 677  | 27  | 27  | 27  | 27  | 27  | 100% | 100% | 100% | 100% | P | P | P | P |   |
| b0924 | mukB | 975549  | 980009  | + | 4460 | 178 | 176 | 176 | 176 | 176 | 99%  | 99%  | 99%  | 99%  | P | P | P | P | U |
| b0925 | ycbB | 980270  | 982117  | + | 1847 | 74  | 68  | 68  | 74  | 74  | 92%  | 92%  | 100% | 100% | P | P | P | P | U |
| b0926 | ycbK | 982298  | 982846  | + | 548  | 22  | 22  | 22  | 22  | 22  | 100% | 100% | 100% | 100% | P | P | P | P | U |
| b0927 | ycbL | 982873  | 983520  | + | 647  | 26  | 26  | 26  | 26  | 26  | 100% | 100% | 100% | 100% | P | P | P | P | U |
| b0932 | pepN | 989845  | 992457  | + | 2612 | 104 | 103 | 103 | 103 | 103 | 99%  | 99%  | 99%  | 99%  | P | P | P | P |   |
| b0938 | ycbQ | 997091  | 997630  | + | 539  | 22  | 0   | 0   | 0   | 0   | 0%   | 0%   | 0%   | 0%   | A | A | A | A | U |
| b0939 | ycbR | 997713  | 998414  | + | 701  | 28  | 0   | 0   | 0   | 0   | 0%   | 0%   | 0%   | 0%   | A | A | A | A | U |
| b0940 | ycbS | 998439  | 1001039 | + | 2600 | 104 | 0   | 0   | 0   | 0   | 0%   | 0%   | 0%   | 0%   | A | A | A | A | U |
| b0941 | ycbT | 1001030 | 1002100 | + | 1070 | 43  | 0   | 0   | 5   | 5   | 0%   | 0%   | 12%  | 12%  | A | A | P | P | U |
| b0942 | ycbU | 1002112 | 1002654 | + | 542  | 22  | 0   | 0   | 2   | 2   | 0%   | 0%   | 9%   | 9%   | A | A | P | P | U |
| b0943 | ycbV | 1002662 | 1003177 | + | 515  | 21  | 0   | 5   | 5   | 5   | 0%   | 24%  | 24%  | 24%  | A | P | P | P | U |
| b0944 | ycbF | 1003170 | 1003880 | + | 710  | 28  | 0   | 5   | 5   | 5   | 0%   | 18%  | 18%  | 18%  | A | P | P | P | U |
| b0945 | pyrD | 1003991 | 1005001 | + | 1010 | 41  | 41  | 41  | 41  | 41  | 100% | 100% | 100% | 100% | P | P | P | P |   |
| b0946 | ycbW | 1005175 | 1005717 | + | 542  | 21  | 21  | 21  | 21  | 21  | 100% | 100% | 100% | 100% | P | P | P | P | U |
| b0948 | rlmL | 1007067 | 1009175 | + | 2108 | 85  | 85  | 85  | 85  | 85  | 100% | 100% | 100% | 100% | P | P | P | P | U |
| b0949 | uup  | 1009187 | 1011094 | + | 1907 | 77  | 77  | 77  | 77  | 77  | 100% | 100% | 100% | 100% | P | P | P | P | U |
| b0950 | pqiA | 1011224 | 1012477 | + | 1253 | 50  | 27  | 27  | 41  | 41  | 54%  | 54%  | 82%  | 82%  | P | P | P | P |   |
| b0951 | pqiB | 1012482 | 1014122 | + | 1640 | 66  | 63  | 63  | 63  | 63  | 95%  | 95%  | 95%  | 95%  | P | P | P | P |   |
| b0952 | ymbA | 1014119 | 1014682 | + | 563  | 22  | 17  | 17  | 17  | 17  | 77%  | 77%  | 77%  | 77%  | P | P | P | P | U |
| b0953 | rnf  | 1014938 | 1015105 | + | 167  | 7   | 7   | 7   | 7   | 7   | 100% | 100% | 100% | 100% | P | P | P | P |   |
| b0956 | ycbG | 1017708 | 1018160 | + | 452  | 18  | 16  | 18  | 18  | 18  | 89%  | 100% | 100% | 100% | P | P | P | P | U |
| b0959 | sxy  | 1020361 | 1020990 | + | 629  | 25  | 15  | 17  | 18  | 21  | 60%  | 68%  | 72%  | 84%  | P | P | P | P | U |
| b0962 | helD | 1023694 | 1025748 | + | 2054 | 82  | 78  | 78  | 78  | 79  | 95%  | 95%  | 95%  | 96%  | P | P | P | P |   |
| b0965 | yccU | 1027169 | 1027582 | + | 413  | 16  | 16  | 16  | 16  | 16  | 100% | 100% | 100% | 100% | P | P | P | P | U |
| b0968 | yccX | 1029287 | 1029565 | + | 278  | 11  | 8   | 10  | 10  | 10  | 73%  | 91%  | 91%  | 91%  | P | P | P | P | U |
| b0972 | hyaA | 1031362 | 1032480 | + | 1118 | 45  | 0   | 2   | 31  | 31  | 0%   | 4%   | 69%  | 69%  | A | P | P | P |   |
| b0973 | hyaB | 1032477 | 1034270 | + | 1793 | 72  | 0   | 0   | 19  | 19  | 0%   | 0%   | 26%  | 26%  | A | A | P | P |   |
| b0974 | hyaC | 1034289 | 1034996 | + | 707  | 28  | 0   | 0   | 10  | 10  | 0%   | 0%   | 36%  | 36%  | A | A | P | P |   |
| b0975 | hyaD | 1034993 | 1035580 | + | 587  | 23  | 0   | 0   | 12  | 12  | 0%   | 0%   | 52%  | 52%  | A | A | P | P |   |
| b0976 | hyaE | 1035577 | 1035975 | + | 398  | 16  | 0   | 0   | 3   | 4   | 0%   | 0%   | 19%  | 25%  | A | A | P | P |   |
| b0977 | hyaF | 1035972 | 1036829 | + | 857  | 34  | 0   | 0   | 2   | 2   | 0%   | 0%   | 6%   | 6%   | A | A | P | P |   |
| b0978 | appC | 1036963 | 1038507 | + | 1544 | 61  | 38  | 38  | 38  | 50  | 62%  | 62%  | 62%  | 82%  | P | P | P | P |   |
| b0979 | appB | 1038519 | 1039655 | + | 1136 | 45  | 15  | 15  | 15  | 22  | 33%  | 33%  | 33%  | 49%  | P | P | P | P |   |
| b4592 | yccB | 1039668 | 1039760 | + | 92   | 3   | 3   | 3   | 3   | 3   | 100% | 100% | 100% | 100% | P | P | P | P | U |
| b0980 | appA | 1039840 | 1041138 | + | 1298 | 52  | 27  | 28  | 28  | 34  | 52%  | 54%  | 54%  | 65%  | P | P | P | P |   |

|       |      |         |         |   |      |     |     |     |     |     |      |      |      |      |   |   |   |   |   |
|-------|------|---------|---------|---|------|-----|-----|-----|-----|-----|------|------|------|------|---|---|---|---|---|
| b4516 | insA | 1049056 | 1049331 | + | 275  | 11  | 11  | 11  | 11  | 11  | 100% | 100% | 100% | 100% | P | P | P | P |   |
| b0988 | insB | 1049250 | 1049753 | + | 503  | 20  | 11  | 14  | 14  | 14  | 55%  | 70%  | 70%  | 70%  | P | P | P | P |   |
| b0990 | cspG | 1050684 | 1050896 | + | 212  | 9   | 0   | 0   | 0   | 0   | 0%   | 0%   | 0%   | 0%   | A | A | A | A |   |
| b0991 | ymcE | 1051070 | 1051300 | + | 230  | 9   | 3   | 3   | 3   | 3   | 33%  | 33%  | 33%  | 33%  | P | P | P | P | U |
| b4517 | gnsA | 1051290 | 1051463 | + | 173  | 7   | 6   | 6   | 6   | 6   | 86%  | 86%  | 86%  | 86%  | P | P | P | P | U |
| b0994 | torT | 1055484 | 1056512 | + | 1028 | 42  | 0   | 2   | 14  | 14  | 0%   | 5%   | 33%  | 33%  | A | P | P | P |   |
| b0996 | torC | 1057307 | 1058479 | + | 1172 | 47  | 0   | 0   | 4   | 4   | 0%   | 0%   | 9%   | 9%   | A | A | P | P |   |
| b0997 | torA | 1058479 | 1061025 | + | 2546 | 102 | 0   | 1   | 8   | 8   | 0%   | 1%   | 8%   | 8%   | A | P | P | P |   |
| b0998 | torD | 1061022 | 1061621 | + | 599  | 24  | 0   | 0   | 1   | 1   | 0%   | 0%   | 4%   | 4%   | A | A | P | P |   |
| b1001 | yccE | 1063259 | 1064515 | + | 1256 | 51  | 0   | 0   | 0   | 0   | 0%   | 0%   | 0%   | 0%   | A | A | A | A | U |
| b1002 | agp  | 1064808 | 1066049 | + | 1241 | 50  | 39  | 39  | 50  | 50  | 78%  | 78%  | 100% | 100% | P | P | P | P |   |
| b4518 | ymdF | 1067304 | 1067477 | + | 173  | 7   | 7   | 7   | 7   | 7   | 100% | 100% | 100% | 100% | P | P | P | P | U |
| b1013 | rutR | 1073465 | 1074103 | + | 638  | 25  | 23  | 23  | 23  | 23  | 92%  | 92%  | 92%  | 92%  | P | P | P | P | U |
| b1015 | putP | 1078528 | 1080036 | + | 1508 | 60  | 60  | 60  | 60  | 60  | 100% | 100% | 100% | 100% | P | P | P | P |   |
| b4490 | efeU | 1080579 | 1081408 | + | 829  | 33  | 32  | 32  | 32  | 32  | 97%  | 97%  | 97%  | 97%  | P | P | P | P | U |
| b1018 | efeO | 1081466 | 1082593 | + | 1127 | 45  | 45  | 45  | 45  | 45  | 100% | 100% | 100% | 100% | P | P | P | P | U |
| b1019 | efeB | 1082599 | 1083870 | + | 1271 | 51  | 48  | 48  | 48  | 49  | 94%  | 94%  | 94%  | 96%  | P | P | P | P | U |
| b1020 | phoH | 1084215 | 1085279 | + | 1064 | 42  | 37  | 37  | 38  | 38  | 88%  | 88%  | 90%  | 90%  | P | P | P | P | U |
| b1025 | ycdT | 1092099 | 1093457 | + | 1358 | 54  | 4   | 5   | 6   | 11  | 7%   | 9%   | 11%  | 20%  | P | P | P | P | U |
| b1028 | ymdE | 1094728 | 1095069 | + | 341  | 14  | 0   | 0   | 0   | 0   | 0%   | 0%   | 0%   | 0%   | A | A | A | A | U |
| b1029 | ycdU | 1095066 | 1096052 | + | 986  | 39  | 0   | 0   | 0   | 0   | 0%   | 0%   | 0%   | 0%   | A | A | A | A | U |
| b1033 | ghrA | 1097109 | 1098047 | + | 938  | 38  | 38  | 38  | 38  | 38  | 100% | 100% | 100% | 100% | P | P | P | P |   |
| b1034 | ycdX | 1098102 | 1098839 | + | 737  | 30  | 30  | 30  | 30  | 30  | 100% | 100% | 100% | 100% | P | P | P | P | U |
| b1035 | ycdY | 1098863 | 1099417 | + | 554  | 22  | 22  | 22  | 22  | 22  | 100% | 100% | 100% | 100% | P | P | P | P | U |
| b1036 | ycdZ | 1099519 | 1100010 | + | 491  | 19  | 18  | 19  | 19  | 19  | 95%  | 100% | 100% | 100% | P | P | P | P | U |
| b1041 | csgB | 1103174 | 1103629 | + | 455  | 18  | 0   | 1   | 1   | 2   | 0%   | 6%   | 6%   | 11%  | A | P | P | P |   |
| b1042 | csgA | 1103670 | 1104125 | + | 455  | 18  | 7   | 13  | 13  | 13  | 39%  | 72%  | 72%  | 72%  | P | P | P | P |   |
| b1043 | csgC | 1104184 | 1104516 | + | 332  | 14  | 0   | 0   | 0   | 0   | 0%   | 0%   | 0%   | 0%   | A | A | A | A | U |
| b1044 | ymdA | 1104637 | 1104948 | + | 311  | 13  | 0   | 0   | 1   | 1   | 0%   | 0%   | 8%   | 8%   | A | A | P | P | U |
| b1045 | ymdB | 1105043 | 1105576 | + | 533  | 21  | 19  | 19  | 21  | 21  | 90%  | 90%  | 100% | 100% | P | P | P | P | U |
| b1046 | ymdC | 1105578 | 1106999 | + | 1421 | 57  | 27  | 27  | 31  | 33  | 47%  | 47%  | 54%  | 58%  | P | P | P | P | U |
| b1048 | mdoG | 1108558 | 1110093 | + | 1535 | 62  | 62  | 62  | 62  | 62  | 100% | 100% | 100% | 100% | P | P | P | P |   |
| b1049 | mdoH | 1110086 | 1112629 | + | 2543 | 102 | 102 | 102 | 102 | 102 | 100% | 100% | 100% | 100% | P | P | P | P |   |
| b1050 | yceK | 1112802 | 1113029 | + | 227  | 9   | 0   | 0   | 0   | 0   | 0%   | 0%   | 0%   | 0%   | A | A | A | A | U |
| b1055 | yceA | 1116030 | 1117082 | + | 1052 | 42  | 42  | 42  | 42  | 42  | 100% | 100% | 100% | 100% | P | P | P | P | U |
| b1066 | rimJ | 1124785 | 1125369 | + | 584  | 23  | 23  | 23  | 23  | 23  | 100% | 100% | 100% | 100% | P | P | P | P |   |
| b1067 | yceH | 1125380 | 1126027 | + | 647  | 26  | 26  | 26  | 26  | 26  | 100% | 100% | 100% | 100% | P | P | P | P | U |
| b1068 | yceM | 1126029 | 1126952 | + | 923  | 37  | 37  | 37  | 37  | 37  | 100% | 100% | 100% | 100% | P | P | P | P | U |
| b1069 | yceN | 1127062 | 1128597 | + | 1535 | 61  | 48  | 48  | 48  | 48  | 79%  | 79%  | 79%  | 79%  | P | P | P | P | U |
| b1073 | flgB | 1130241 | 1130657 | + | 416  | 17  | 0   | 0   | 0   | 0   | 0%   | 0%   | 0%   | 0%   | A | A | A | A |   |
| b1074 | flgC | 1130661 | 1131065 | + | 404  | 16  | 0   | 0   | 0   | 0   | 0%   | 0%   | 0%   | 0%   | A | A | A | A |   |
| b1075 | flgD | 1131077 | 1131772 | + | 695  | 27  | 0   | 0   | 0   | 0   | 0%   | 0%   | 0%   | 0%   | A | A | A | A |   |
| b1076 | flgE | 1131797 | 1133005 | + | 1208 | 49  | 0   | 0   | 0   | 0   | 0%   | 0%   | 0%   | 0%   | A | A | A | A |   |
| b1077 | flgF | 1133025 | 1133780 | + | 755  | 30  | 0   | 0   | 0   | 0   | 0%   | 0%   | 0%   | 0%   | A | A | A | A |   |
| b1078 | flgG | 1133952 | 1134734 | + | 782  | 31  | 0   | 0   | 0   | 0   | 0%   | 0%   | 0%   | 0%   | A | A | A | A |   |
| b1079 | flgH | 1134787 | 1135485 | + | 698  | 28  | 0   | 0   | 0   | 0   | 0%   | 0%   | 0%   | 0%   | A | A | A | A |   |

|         |       |         |         |   |      |    |    |    |    |    |      |      |      |      |   |   |   |   |   |
|---------|-------|---------|---------|---|------|----|----|----|----|----|------|------|------|------|---|---|---|---|---|
| b1080   | flgI  | 1135497 | 1136594 | + | 1097 | 44 | 0  | 0  | 0  | 0  | 0%   | 0%   | 0%   | 0%   | A | A | A | A | U |
| b1081   | flgJ  | 1136594 | 1137535 | + | 941  | 38 | 0  | 0  | 0  | 0  | 0%   | 0%   | 0%   | 0%   | A | A | A | A |   |
| b1082   | flgK  | 1137601 | 1139244 | + | 1643 | 66 | 4  | 19 | 23 | 23 | 6%   | 29%  | 35%  | 35%  | P | P | P | P |   |
| b1083   | flgL  | 1139256 | 1140209 | + | 953  | 38 | 6  | 17 | 22 | 22 | 16%  | 45%  | 58%  | 58%  | P | P | P | P |   |
| b1085   | yceQ  | 1143725 | 1144045 | + | 320  | 13 | 0  | 0  | 0  | 0  | 0%   | 0%   | 0%   | 0%   | A | A | A | A | U |
| b1086   | rluC  | 1144163 | 1145122 | + | 959  | 38 | 37 | 37 | 37 | 37 | 97%  | 97%  | 97%  | 97%  | P | P | P | P |   |
| b4418   | psrD  | 1145812 | 1145980 | + | 168  | 7  | 5  | 6  | 7  | 7  | 71%  | 86%  | 100% | 100% | P | P | P | P | U |
| b1088   | yceD  | 1146017 | 1146538 | + | 521  | 21 | 21 | 21 | 21 | 21 | 100% | 100% | 100% | 100% | P | P | P | P | U |
| b1089   | rpmF  | 1146590 | 1146763 | + | 173  | 7  | 7  | 7  | 7  | 7  | 100% | 100% | 100% | 100% | P | P | P | P |   |
| b1090   | plsX  | 1146844 | 1147914 | + | 1070 | 43 | 43 | 43 | 43 | 43 | 100% | 100% | 100% | 100% | P | P | P | P |   |
| b1091   | fabH  | 1147982 | 1148935 | + | 953  | 38 | 38 | 38 | 38 | 38 | 100% | 100% | 100% | 100% | P | P | P | P |   |
| b1092   | fabD  | 1148951 | 1149880 | + | 929  | 38 | 38 | 38 | 38 | 38 | 100% | 100% | 100% | 100% | P | P | P | P |   |
| b1093   | fabG  | 1149893 | 1150627 | + | 734  | 29 | 29 | 29 | 29 | 29 | 100% | 100% | 100% | 100% | P | P | P | P |   |
| b1094   | acpP  | 1150838 | 1151074 | + | 236  | 9  | 9  | 9  | 9  | 9  | 100% | 100% | 100% | 100% | P | P | P | P |   |
| b1095   | fabF  | 1151162 | 1152403 | + | 1241 | 49 | 48 | 48 | 48 | 48 | 98%  | 98%  | 98%  | 98%  | P | P | P | P |   |
| b1096   | pabC  | 1152523 | 1153332 | + | 809  | 33 | 26 | 29 | 29 | 30 | 79%  | 88%  | 88%  | 91%  | P | P | P | P |   |
| b1097   | yceG  | 1153335 | 1154357 | + | 1022 | 41 | 36 | 36 | 36 | 36 | 88%  | 88%  | 88%  | 88%  | P | P | P | P | U |
| b1098   | tmk   | 1154347 | 1154988 | + | 641  | 26 | 25 | 25 | 25 | 25 | 96%  | 96%  | 96%  | 96%  | P | P | P | P |   |
| b1099   | holB  | 1154985 | 1155989 | + | 1004 | 40 | 39 | 39 | 39 | 39 | 98%  | 98%  | 98%  | 98%  | P | P | P | P |   |
| b1100   | ycfH  | 1156000 | 1156797 | + | 797  | 32 | 31 | 31 | 32 | 32 | 97%  | 97%  | 100% | 100% | P | P | P | P | U |
| b1101   | ptsG  | 1157092 | 1158525 | + | 1433 | 57 | 57 | 57 | 57 | 57 | 100% | 100% | 100% | 100% | P | P | P | P |   |
| b1103   | hinT  | 1161108 | 1161467 | + | 359  | 14 | 14 | 14 | 14 | 14 | 100% | 100% | 100% | 100% | P | P | P | P |   |
| b1104   | ycfL  | 1161470 | 1161847 | + | 377  | 15 | 15 | 15 | 15 | 15 | 100% | 100% | 100% | 100% | P | P | P | P | U |
| b1105   | ycfM  | 1161861 | 1162502 | + | 641  | 25 | 25 | 25 | 25 | 25 | 100% | 100% | 100% | 100% | P | P | P | P | U |
| b1106   | thiK  | 1162483 | 1163307 | + | 824  | 33 | 32 | 32 | 32 | 32 | 97%  | 97%  | 97%  | 97%  | P | P | P | P |   |
| b1107   | nagZ  | 1163318 | 1164343 | + | 1025 | 41 | 41 | 41 | 41 | 41 | 100% | 100% | 100% | 100% | P | P | P | P |   |
| b1108   | ycfP  | 1164366 | 1164908 | + | 542  | 22 | 22 | 22 | 22 | 22 | 100% | 100% | 100% | 100% | P | P | P | P | U |
| b1109   | ndh   | 1165308 | 1166612 | + | 1304 | 52 | 52 | 52 | 52 | 52 | 100% | 100% | 100% | 100% | P | P | P | P |   |
| b1110   | ycfJ  | 1166822 | 1167361 | + | 539  | 22 | 3  | 19 | 19 | 19 | 14%  | 86%  | 86%  | 86%  | P | P | P | P | U |
| b1112   | bhsA  | 1168296 | 1168553 | + | 257  | 10 | 9  | 9  | 10 | 10 | 90%  | 90%  | 100% | 100% | P | P | P | P | U |
| b1116   | lolC  | 1174650 | 1175849 | + | 1199 | 48 | 47 | 47 | 47 | 47 | 98%  | 98%  | 98%  | 98%  | P | P | P | P |   |
| b1117   | lolD  | 1175842 | 1176543 | + | 701  | 28 | 28 | 28 | 28 | 28 | 100% | 100% | 100% | 100% | P | P | P | P |   |
| b1118   | lolE  | 1176543 | 1177787 | + | 1244 | 50 | 49 | 49 | 49 | 49 | 98%  | 98%  | 98%  | 98%  | P | P | P | P |   |
| b1119   | nagK  | 1177816 | 1178727 | + | 911  | 36 | 36 | 36 | 36 | 36 | 100% | 100% | 100% | 100% | P | P | P | P |   |
| b1120   | cobB  | 1178743 | 1179582 | + | 839  | 34 | 33 | 33 | 33 | 33 | 97%  | 97%  | 97%  | 97%  | P | P | P | P |   |
| b1127   | pepT  | 1185067 | 1186293 | + | 1226 | 49 | 46 | 47 | 47 | 48 | 94%  | 96%  | 96%  | 98%  | P | P | P | P |   |
| b1136   | icd   | 1194346 | 1195596 | + | 1250 | 50 | 50 | 50 | 50 | 50 | 100% | 100% | 100% | 100% | P | P | P | P |   |
| GO-8897 | C0293 | 1195937 | 1196009 | + | 72   | 3  | 0  | 0  | 0  | 0  | 0%   | 0%   | 0%   | 0%   | A | A | A | A |   |
| b1139   | lit   | 1197918 | 1198811 | + | 893  | 36 | 10 | 10 | 10 | 13 | 28%  | 28%  | 28%  | 36%  | P | P | P | P |   |
| b1143   | ymfI  | 1200720 | 1201061 | + | 341  | 14 | 13 | 13 | 13 | 13 | 93%  | 93%  | 93%  | 93%  | P | P | P | P | U |
| b1146   | ymfT  | 1202247 | 1202447 | + | 200  | 8  | 0  | 0  | 0  | 0  | 0%   | 0%   | 0%   | 0%   | A | A | A | A | U |
| b1147   | ymfL  | 1202491 | 1203048 | + | 557  | 22 | 0  | 0  | 0  | 0  | 0%   | 0%   | 0%   | 0%   | A | A | A | A | U |
| b1148   | ymfM  | 1203045 | 1203383 | + | 338  | 14 | 0  | 0  | 0  | 0  | 0%   | 0%   | 0%   | 0%   | A | A | A | A | U |
| b1149   | ymfN  | 1203393 | 1204760 | + | 1367 | 55 | 0  | 0  | 0  | 0  | 0%   | 0%   | 0%   | 0%   | A | A | A | A | U |
| b1150   | ymfR  | 1204772 | 1204954 | + | 182  | 8  | 0  | 0  | 0  | 0  | 0%   | 0%   | 0%   | 0%   | A | A | A | A | U |
| b1151   | ymfO  | 1204954 | 1205365 | + | 411  | 16 | 0  | 0  | 0  | 0  | 0%   | 0%   | 0%   | 0%   | A | A | A | A | U |

|         |       |         |         |   |      |     |    |    |    |    |      |      |      |      |   |   |   |   |   |
|---------|-------|---------|---------|---|------|-----|----|----|----|----|------|------|------|------|---|---|---|---|---|
| b1152   | ymfP  | 1205366 | 1206145 | + | 779  | 31  | 0  | 0  | 0  | 0  | 0%   | 0%   | 0%   | 0%   | A | A | A | A | U |
| b1153   | ymfQ  | 1206136 | 1206720 | + | 584  | 23  | 0  | 0  | 0  | 0  | 0%   | 0%   | 0%   | 0%   | A | A | A | A | U |
| b1154   | ycfK  | 1206724 | 1207353 | + | 629  | 25  | 0  | 0  | 0  | 0  | 0%   | 0%   | 0%   | 0%   | A | A | A | A | U |
| b1155   | ymfS  | 1207355 | 1207768 | + | 413  | 17  | 0  | 0  | 0  | 0  | 0%   | 0%   | 0%   | 0%   | A | A | A | A | U |
| b1158   | pinE  | 1208908 | 1209462 | + | 554  | 22  | 0  | 0  | 0  | 0  | 0%   | 0%   | 0%   | 0%   | A | A | A | A |   |
| b1159   | mcrA  | 1209569 | 1210402 | + | 833  | 33  | 0  | 0  | 0  | 0  | 0%   | 0%   | 0%   | 0%   | A | A | A | A |   |
| b4519   | icdC  | 1210636 | 1210800 | + | 164  | 7   | 5  | 5  | 5  | 5  | 71%  | 71%  | 71%  | 71%  | P | P | P | P | U |
| b1164   | ycgZ  | 1215012 | 1215248 | + | 236  | 10  | 10 | 10 | 10 | 10 | 100% | 100% | 100% | 100% | P | P | P | P | U |
| b1165   | ymgA  | 1215291 | 1215563 | + | 272  | 11  | 7  | 7  | 11 | 11 | 64%  | 64%  | 100% | 100% | P | P | P | P | U |
| b1166   | ariR  | 1215592 | 1215858 | + | 266  | 11  | 6  | 6  | 9  | 9  | 55%  | 55%  | 82%  | 82%  | P | P | P | P | U |
| b1167   | ymgC  | 1215971 | 1216219 | + | 248  | 10  | 0  | 1  | 6  | 6  | 0%   | 10%  | 60%  | 60%  | A | P | P | P | U |
| b1168   | ycgG  | 1216551 | 1218074 | + | 1523 | 61  | 0  | 0  | 8  | 8  | 0%   | 0%   | 13%  | 13%  | A | A | P | P | U |
| b4520   | ymgF  | 1218206 | 1218424 | + | 218  | 9   | 0  | 0  | 0  | 0  | 0%   | 0%   | 0%   | 0%   | A | A | A | A | U |
| b4491   | ycgH  | 1218824 | 1221471 | + | 2647 | 106 | 26 | 30 | 36 | 38 | 25%  | 28%  | 34%  | 36%  | P | P | P | P | U |
| b4594   | ymgJ  | 1222487 | 1222672 | + | 185  | 8   | 0  | 0  | 0  | 0  | 0%   | 0%   | 0%   | 0%   | A | A | A | A | U |
| b4521   | ycgI  | 1222787 | 1223130 | + | 343  | 14  | 0  | 5  | 10 | 10 | 0%   | 36%  | 71%  | 71%  | A | P | P | P | U |
| b1177   | ycgJ  | 1225823 | 1226191 | + | 368  | 14  | 13 | 13 | 13 | 13 | 93%  | 93%  | 93%  | 93%  | P | P | P | P | U |
| b1179   | ycgL  | 1226904 | 1227230 | + | 326  | 13  | 12 | 12 | 12 | 13 | 92%  | 92%  | 92%  | 100% | P | P | P | P | U |
| b1180   | ycgM  | 1227302 | 1227961 | + | 659  | 26  | 26 | 26 | 26 | 26 | 100% | 100% | 100% | 100% | P | P | P | P | U |
| b1181   | ycgN  | 1228038 | 1228499 | + | 461  | 19  | 17 | 17 | 19 | 19 | 89%  | 89%  | 100% | 100% | P | P | P | P | U |
| G0-8898 | C0299 | 1229852 | 1229930 | + | 78   | 3   | 0  | 0  | 1  | 1  | 0%   | 0%   | 33%  | 33%  | A | A | P | P |   |
| b1183   | umuD  | 1229990 | 1230409 | + | 419  | 17  | 1  | 1  | 5  | 5  | 6%   | 6%   | 29%  | 29%  | P | P | P | P |   |
| b1184   | umuC  | 1230409 | 1231677 | + | 1268 | 51  | 4  | 4  | 7  | 8  | 8%   | 8%   | 14%  | 16%  | P | P | P | P |   |
| b1187   | fadR  | 1234161 | 1234880 | + | 719  | 29  | 29 | 29 | 29 | 29 | 100% | 100% | 100% | 100% | P | P | P | P |   |
| b1189   | dadA  | 1236794 | 1238092 | + | 1298 | 52  | 51 | 51 | 51 | 51 | 98%  | 98%  | 98%  | 98%  | P | P | P | P |   |
| b1190   | dadX  | 1238102 | 1239172 | + | 1070 | 43  | 32 | 32 | 34 | 34 | 74%  | 74%  | 79%  | 79%  | P | P | P | P |   |
| b1193   | emtA  | 1242403 | 1243014 | + | 611  | 24  | 24 | 24 | 24 | 24 | 100% | 100% | 100% | 100% | P | P | P | P |   |
| b1195   | ymgE  | 1243951 | 1244205 | + | 254  | 10  | 6  | 9  | 10 | 10 | 60%  | 90%  | 100% | 100% | P | P | P | P | U |
| b1196   | ycgY  | 1244383 | 1244823 | + | 440  | 17  | 0  | 2  | 7  | 7  | 0%   | 12%  | 41%  | 41%  | A | P | P | P | U |
| b1201   | dhaR  | 1250289 | 1252208 | + | 1919 | 77  | 25 | 39 | 39 | 39 | 32%  | 51%  | 51%  | 51%  | P | P | P | P | U |
| b1205   | ychH  | 1258014 | 1258292 | + | 278  | 11  | 11 | 11 | 11 | 11 | 100% | 100% | 100% | 100% | P | P | P | P | U |
| b1210   | hemA  | 1262937 | 1264193 | + | 1256 | 50  | 50 | 50 | 50 | 50 | 100% | 100% | 100% | 100% | P | P | P | P |   |
| b1211   | prfA  | 1264235 | 1265317 | + | 1082 | 43  | 42 | 42 | 42 | 42 | 98%  | 98%  | 98%  | 98%  | P | P | P | P |   |
| b1212   | prmC  | 1265317 | 1266150 | + | 833  | 34  | 23 | 23 | 23 | 23 | 68%  | 68%  | 68%  | 68%  | P | P | P | P |   |
| b1213   | ychQ  | 1266147 | 1266539 | + | 392  | 16  | 8  | 8  | 8  | 8  | 50%  | 50%  | 50%  | 50%  | P | P | P | P | U |
| b1214   | ychA  | 1266543 | 1267352 | + | 809  | 33  | 33 | 33 | 33 | 33 | 100% | 100% | 100% | 100% | P | P | P | P | U |
| b1215   | kdsA  | 1267388 | 1268242 | + | 854  | 34  | 34 | 34 | 34 | 34 | 100% | 100% | 100% | 100% | P | P | P | P |   |
| b4420   | rdlA  | 1268546 | 1268612 | + | 66   | 3   | 2  | 2  | 2  | 2  | 67%  | 67%  | 67%  | 67%  | P | P | P | P |   |
| b4422   | rdlB  | 1269081 | 1269146 | + | 65   | 2   | 0  | 0  | 1  | 1  | 0%   | 0%   | 50%  | 50%  | A | A | P | P |   |
| b4424   | rdlC  | 1269616 | 1269683 | + | 67   | 3   | 2  | 2  | 2  | 2  | 67%  | 67%  | 67%  | 67%  | P | P | P | P |   |
| b1217   | chaB  | 1271342 | 1271572 | + | 230  | 9   | 8  | 9  | 9  | 9  | 89%  | 100% | 100% | 100% | P | P | P | P | U |
| b1218   | chaC  | 1271730 | 1272425 | + | 695  | 28  | 28 | 28 | 28 | 28 | 100% | 100% | 100% | 100% | P | P | P | P |   |
| b1220   | ychO  | 1273007 | 1274401 | + | 1394 | 56  | 31 | 31 | 31 | 36 | 55%  | 55%  | 55%  | 64%  | P | P | P | P | U |
| b1223   | narK  | 1277180 | 1278571 | + | 1391 | 55  | 0  | 0  | 18 | 18 | 0%   | 0%   | 33%  | 33%  | A | A | P | P |   |
| b1224   | narG  | 1279087 | 1282830 | + | 3743 | 150 | 0  | 0  | 0  | 50 | 0%   | 0%   | 0%   | 33%  | A | A | A | P |   |
| b1225   | narH  | 1282827 | 1284365 | + | 1538 | 61  | 0  | 0  | 5  | 5  | 0%   | 0%   | 8%   | 8%   | A | A | P | P |   |

|       |      |         |         |   |      |     |     |     |     |     |      |      |      |      |   |   |   |   |   |
|-------|------|---------|---------|---|------|-----|-----|-----|-----|-----|------|------|------|------|---|---|---|---|---|
| b1226 | narJ | 1284362 | 1285072 | + | 710  | 28  | 0   | 0   | 1   | 1   | 0%   | 0%   | 4%   | 4%   | A | A | P | P |   |
| b1227 | narI | 1285072 | 1285749 | + | 677  | 27  | 0   | 0   | 0   | 0   | 0%   | 0%   | 0%   | 0%   | A | A | A | A |   |
| b1228 | ychS | 1285932 | 1286207 | + | 275  | 11  | 0   | 0   | 0   | 0   | 0%   | 0%   | 0%   | 0%   | A | A | A | A | U |
| b1234 | rssA | 1288429 | 1289373 | + | 944  | 37  | 37  | 37  | 37  | 37  | 100% | 100% | 100% | 100% | P | P | P | P | U |
| b1235 | rssB | 1289465 | 1290478 | + | 1013 | 41  | 41  | 41  | 41  | 41  | 100% | 100% | 100% | 100% | P | P | P | P |   |
| b1236 | galU | 1290680 | 1291588 | + | 908  | 36  | 36  | 36  | 36  | 36  | 100% | 100% | 100% | 100% | P | P | P | P |   |
| b1238 | tdk  | 1292750 | 1293367 | + | 617  | 25  | 23  | 23  | 23  | 23  | 92%  | 92%  | 92%  | 92%  | P | P | P | P |   |
| b1242 | ychE | 1297821 | 1298468 | + | 647  | 26  | 0   | 4   | 4   | 4   | 0%   | 15%  | 15%  | 15%  | A | P | P | P | U |
| b1243 | oppA | 1299206 | 1300837 | + | 1631 | 65  | 65  | 65  | 65  | 65  | 100% | 100% | 100% | 100% | P | P | P | P |   |
| b1244 | oppB | 1300923 | 1301843 | + | 920  | 37  | 37  | 37  | 37  | 37  | 100% | 100% | 100% | 100% | P | P | P | P |   |
| b1245 | oppC | 1301858 | 1302766 | + | 908  | 36  | 36  | 36  | 36  | 36  | 100% | 100% | 100% | 100% | P | P | P | P |   |
| b1246 | oppD | 1302778 | 1303791 | + | 1013 | 40  | 40  | 40  | 40  | 40  | 100% | 100% | 100% | 100% | P | P | P | P |   |
| b1247 | oppF | 1303788 | 1304792 | + | 1004 | 40  | 38  | 38  | 38  | 38  | 95%  | 95%  | 95%  | 95%  | P | P | P | P |   |
| b4595 | yciY | 1306812 | 1306985 | + | 173  | 7   | 6   | 6   | 6   | 6   | 86%  | 86%  | 86%  | 86%  | P | P | P | P | U |
| b1252 | tonB | 1309113 | 1309832 | + | 719  | 29  | 29  | 29  | 29  | 29  | 100% | 100% | 100% | 100% | P | P | P | P |   |
| b1256 | ompW | 1312044 | 1312682 | + | 638  | 26  | 23  | 26  | 26  | 26  | 88%  | 100% | 100% | 100% | P | P | P | P |   |
| b1266 | trpH | 1321244 | 1322125 | + | 881  | 35  | 33  | 33  | 33  | 33  | 94%  | 94%  | 94%  | 94%  | P | P | P | P | U |
| b1267 | yciO | 1322122 | 1322742 | + | 620  | 25  | 25  | 25  | 25  | 25  | 100% | 100% | 100% | 100% | P | P | P | P | U |
| b1268 | yciQ | 1322770 | 1324665 | + | 1895 | 76  | 14  | 15  | 16  | 20  | 18%  | 20%  | 21%  | 26%  | P | P | P | P | U |
| b1269 | rluB | 1324876 | 1325751 | + | 875  | 35  | 35  | 35  | 35  | 35  | 100% | 100% | 100% | 100% | P | P | P | P |   |
| b1272 | sohB | 1327356 | 1328405 | + | 1049 | 42  | 41  | 41  | 41  | 41  | 98%  | 98%  | 98%  | 98%  | P | P | P | P | U |
| b1274 | topA | 1329072 | 1331669 | + | 2597 | 104 | 102 | 102 | 102 | 103 | 98%  | 98%  | 98%  | 99%  | P | P | P | P |   |
| b1275 | cysB | 1331879 | 1332853 | + | 974  | 39  | 35  | 35  | 35  | 37  | 90%  | 90%  | 90%  | 95%  | P | P | P | P |   |
| b4522 | ymiA | 1333184 | 1333312 | + | 128  | 5   | 5   | 5   | 5   | 5   | 100% | 100% | 100% | 100% | P | P | P | P | U |
| b4523 | yciX | 1333315 | 1333482 | + | 167  | 6   | 6   | 6   | 6   | 6   | 100% | 100% | 100% | 100% | P | P | P | P | U |
| b1276 | acnA | 1333855 | 1336530 | + | 2675 | 107 | 107 | 107 | 107 | 107 | 100% | 100% | 100% | 100% | P | P | P | P |   |
| b1278 | pgpB | 1337354 | 1338118 | + | 764  | 31  | 27  | 27  | 27  | 27  | 87%  | 87%  | 87%  | 87%  | P | P | P | P |   |
| b1279 | yciS | 1338267 | 1338575 | + | 308  | 12  | 12  | 12  | 12  | 12  | 100% | 100% | 100% | 100% | P | P | P | P | U |
| b1280 | yciM | 1338582 | 1339751 | + | 1169 | 47  | 44  | 46  | 46  | 46  | 94%  | 98%  | 98%  | 98%  | P | P | P | P | U |
| b1281 | pyrF | 1339945 | 1340682 | + | 737  | 29  | 29  | 29  | 29  | 29  | 100% | 100% | 100% | 100% | P | P | P | P |   |
| b1282 | yciH | 1340682 | 1341008 | + | 326  | 13  | 12  | 12  | 12  | 12  | 92%  | 92%  | 92%  | 92%  | P | P | P | P | U |
| b1298 | puuD | 1359144 | 1359908 | + | 764  | 30  | 30  | 30  | 30  | 30  | 100% | 100% | 100% | 100% | P | P | P | P |   |
| b1299 | puuR | 1359935 | 1360492 | + | 557  | 23  | 22  | 22  | 22  | 22  | 96%  | 96%  | 96%  | 96%  | P | P | P | P |   |
| b1300 | puuC | 1360767 | 1362254 | + | 1487 | 59  | 54  | 54  | 54  | 54  | 92%  | 92%  | 92%  | 92%  | P | P | P | P |   |
| b1301 | puuB | 1362256 | 1363536 | + | 1280 | 51  | 39  | 39  | 39  | 39  | 76%  | 76%  | 76%  | 76%  | P | P | P | P |   |
| b1302 | puuE | 1363574 | 1364839 | + | 1265 | 50  | 23  | 23  | 23  | 23  | 46%  | 46%  | 46%  | 46%  | P | P | P | P |   |
| b1304 | pspA | 1366103 | 1366771 | + | 668  | 27  | 27  | 27  | 27  | 27  | 100% | 100% | 100% | 100% | P | P | P | P |   |
| b1305 | pspB | 1366825 | 1367049 | + | 224  | 9   | 9   | 9   | 9   | 9   | 100% | 100% | 100% | 100% | P | P | P | P |   |
| b1306 | pspC | 1367049 | 1367408 | + | 359  | 14  | 11  | 14  | 14  | 14  | 79%  | 100% | 100% | 100% | P | P | P | P |   |
| b1307 | pspD | 1367417 | 1367638 | + | 221  | 8   | 7   | 8   | 8   | 8   | 88%  | 100% | 100% | 100% | P | P | P | P |   |
| b1308 | pspE | 1367713 | 1368027 | + | 314  | 13  | 11  | 11  | 11  | 11  | 85%  | 85%  | 85%  | 85%  | P | P | P | P |   |
| b1309 | ycjM | 1368240 | 1369919 | + | 1679 | 68  | 0   | 0   | 4   | 4   | 0%   | 0%   | 6%   | 6%   | A | A | P | P | U |
| b1310 | ycjN | 1369933 | 1371225 | + | 1292 | 52  | 0   | 0   | 1   | 1   | 0%   | 0%   | 2%   | 2%   | A | A | P | P | U |
| b1311 | ycjO | 1371246 | 1372127 | + | 881  | 35  | 0   | 0   | 1   | 1   | 0%   | 0%   | 3%   | 3%   | A | A | P | P | U |
| b1312 | ycjP | 1372114 | 1372956 | + | 842  | 34  | 0   | 0   | 1   | 1   | 0%   | 0%   | 3%   | 3%   | A | A | P | P | U |
| b1313 | ycjQ | 1372987 | 1374039 | + | 1052 | 42  | 0   | 0   | 3   | 4   | 0%   | 0%   | 7%   | 10%  | A | A | P | P | U |



|         |       |         |         |   |      |     |    |    |    |    |      |      |      |      |   |   |   |   |   |
|---------|-------|---------|---------|---|------|-----|----|----|----|----|------|------|------|------|---|---|---|---|---|
| b1314   | ycjR  | 1374058 | 1374846 | + | 788  | 32  | 0  | 0  | 1  | 1  | 0%   | 0%   | 3%   | 3%   | A | A | P | P | U |
| b1315   | ycjS  | 1374856 | 1375911 | + | 1055 | 42  | 0  | 0  | 1  | 3  | 0%   | 0%   | 2%   | 7%   | A | A | P | P | U |
| b1316   | ycjT  | 1375908 | 1378175 | + | 2267 | 91  | 0  | 0  | 5  | 5  | 0%   | 0%   | 5%   | 5%   | A | A | P | P | U |
| b1317   | ycjU  | 1378172 | 1378831 | + | 659  | 26  | 0  | 0  | 0  | 0  | 0%   | 0%   | 0%   | 0%   | A | A | A | A | U |
| b4524   | ycjV  | 1378845 | 1379926 | + | 1081 | 43  | 0  | 0  | 0  | 1  | 0%   | 0%   | 0%   | 2%   | A | A | A | P | U |
| b1319   | ompG  | 1379971 | 1380876 | + | 905  | 36  | 0  | 0  | 0  | 0  | 0%   | 0%   | 0%   | 0%   | A | A | A | A |   |
| b1321   | ycjX  | 1382141 | 1383538 | + | 1397 | 56  | 54 | 56 | 56 | 56 | 96%  | 100% | 100% | 100% | P | P | P | P | U |
| b1322   | ycjF  | 1383535 | 1384596 | + | 1061 | 43  | 30 | 43 | 43 | 43 | 70%  | 100% | 100% | 100% | P | P | P | P | U |
| b1323   | tyrR  | 1384744 | 1386285 | + | 1541 | 61  | 60 | 60 | 60 | 60 | 98%  | 98%  | 98%  | 98%  | P | P | P | P |   |
| b1325   | ycjG  | 1386954 | 1387919 | + | 965  | 39  | 28 | 29 | 33 | 33 | 72%  | 74%  | 85%  | 85%  | P | P | P | P |   |
| b1328   | ycjZ  | 1390015 | 1390914 | + | 899  | 36  | 24 | 24 | 24 | 24 | 67%  | 67%  | 67%  | 67%  | P | P | P | P | U |
| b1329   | mppA  | 1391251 | 1392864 | + | 1613 | 64  | 56 | 56 | 56 | 56 | 88%  | 88%  | 88%  | 88%  | P | P | P | P |   |
| b1331   | insH  | 1394100 | 1395116 | + | 1016 | 41  | 41 | 41 | 41 | 41 | 100% | 100% | 100% | 100% | P | P | P | P |   |
| b1332   | ynaJ  | 1395389 | 1395646 | + | 257  | 11  | 11 | 11 | 11 | 11 | 100% | 100% | 100% | 100% | P | P | P | P | U |
| b1339   | abgR  | 1402765 | 1403673 | + | 908  | 37  | 2  | 2  | 3  | 33 | 5%   | 5%   | 8%   | 89%  | P | P | P | P | U |
| b1340   | ydaL  | 1404003 | 1404566 | + | 563  | 22  | 21 | 22 | 22 | 22 | 95%  | 100% | 100% | 100% | P | P | P | P | U |
| b1342   | ydaN  | 1406074 | 1407057 | + | 983  | 39  | 35 | 36 | 37 | 37 | 90%  | 92%  | 95%  | 95%  | P | P | P | P | U |
| GO-8900 | C0343 | 1407387 | 1407461 | + | 74   | 3   | 3  | 3  | 3  | 3  | 100% | 100% | 100% | 100% | P | P | P | P |   |
| b1343   | dbpA  | 1407535 | 1408908 | + | 1373 | 55  | 38 | 38 | 38 | 38 | 69%  | 69%  | 69%  | 69%  | P | P | P | P |   |
| b1353   | sieB  | 1416695 | 1417183 | + | 488  | 19  | 0  | 0  | 0  | 0  | 0%   | 0%   | 0%   | 0%   | A | A | A | A |   |
| b1357   | ydaS  | 1418389 | 1418685 | + | 296  | 12  | 0  | 0  | 0  | 0  | 0%   | 0%   | 0%   | 0%   | A | A | A | A | U |
| b1358   | ydaT  | 1418708 | 1419130 | + | 422  | 17  | 0  | 0  | 0  | 0  | 0%   | 0%   | 0%   | 0%   | A | A | A | A | U |
| b1359   | ydaU  | 1419143 | 1420000 | + | 857  | 34  | 0  | 0  | 0  | 0  | 0%   | 0%   | 0%   | 0%   | A | A | A | A | U |
| b1360   | ydaV  | 1420007 | 1420753 | + | 746  | 30  | 0  | 0  | 0  | 0  | 0%   | 0%   | 0%   | 0%   | A | A | A | A | U |
| b1361   | ydaW  | 1420725 | 1421224 | + | 499  | 20  | 0  | 0  | 0  | 0  | 0%   | 0%   | 0%   | 0%   | A | A | A | A | U |
| b1362   | rzpR  | 1421225 | 1421668 | + | 443  | 18  | 0  | 0  | 0  | 0  | 0%   | 0%   | 0%   | 0%   | A | A | A | A | U |
| b4528   | rzoR  | 1421424 | 1421609 | + | 185  | 7   | 0  | 0  | 0  | 0  | 0%   | 0%   | 0%   | 0%   | A | A | A | A | U |
| b1363   | trkG  | 1421806 | 1423263 | + | 1457 | 59  | 10 | 10 | 11 | 14 | 17%  | 17%  | 19%  | 24%  | P | P | P | P |   |
| b1365   | ynaK  | 1423401 | 1423664 | + | 263  | 11  | 0  | 0  | 0  | 0  | 0%   | 0%   | 0%   | 0%   | A | A | A | A | U |
| b1366   | ydaY  | 1423654 | 1424106 | + | 452  | 18  | 0  | 0  | 0  | 0  | 0%   | 0%   | 0%   | 0%   | A | A | A | A | U |
| b1368   | ynaA  | 1424478 | 1425410 | + | 932  | 37  | 0  | 0  | 0  | 0  | 0%   | 0%   | 0%   | 0%   | A | A | A | A | U |
| b4570   | lomR  | 1425413 | 1425622 | + | 209  | 8   | 0  | 0  | 0  | 0  | 0%   | 0%   | 0%   | 0%   | A | A | A | A | U |
| b4570   | lomR  | 1426819 | 1427008 | + | 189  | 7   | 0  | 0  | 0  | 0  | 0%   | 0%   | 0%   | 0%   | A | A | A | A | U |
| b1372   | stfR  | 1427073 | 1430435 | + | 3362 | 134 | 0  | 0  | 17 | 17 | 0%   | 0%   | 13%  | 13%  | A | A | P | P | U |
| b1373   | tfaR  | 1430435 | 1431010 | + | 575  | 23  | 0  | 0  | 2  | 4  | 0%   | 0%   | 9%   | 17%  | A | A | P | P | U |
| b4427   | micC  | 1435145 | 1435253 | + | 108  | 4   | 0  | 0  | 0  | 1  | 0%   | 0%   | 0%   | 25%  | A | A | A | P |   |
| b4529   | ydbJ  | 1439082 | 1439348 | + | 266  | 11  | 11 | 11 | 11 | 11 | 100% | 100% | 100% | 100% | P | P | P | P | U |
| b1381   | ydbH  | 1441075 | 1443714 | + | 2639 | 106 | 54 | 54 | 57 | 57 | 51%  | 51%  | 54%  | 54%  | P | P | P | P | U |
| b1382   | ynbE  | 1443711 | 1443896 | + | 185  | 8   | 8  | 8  | 8  | 8  | 100% | 100% | 100% | 100% | P | P | P | P | U |
| b1383   | ydbL  | 1443904 | 1444230 | + | 326  | 13  | 13 | 13 | 13 | 13 | 100% | 100% | 100% | 100% | P | P | P | P | U |
| b1385   | feaB  | 1445543 | 1447042 | + | 1499 | 60  | 13 | 13 | 32 | 32 | 22%  | 22%  | 53%  | 53%  | P | P | P | P |   |
| b1388   | paaA  | 1451951 | 1452880 | + | 929  | 37  | 0  | 0  | 0  | 0  | 0%   | 0%   | 0%   | 0%   | A | A | A | A | U |
| b1389   | paaB  | 1452892 | 1453179 | + | 287  | 11  | 0  | 0  | 0  | 0  | 0%   | 0%   | 0%   | 0%   | A | A | A | A | U |
| b1390   | paaC  | 1453188 | 1453934 | + | 746  | 30  | 0  | 0  | 0  | 0  | 0%   | 0%   | 0%   | 0%   | A | A | A | A | U |
| b1391   | paaD  | 1453943 | 1454446 | + | 503  | 20  | 0  | 0  | 0  | 0  | 0%   | 0%   | 0%   | 0%   | A | A | A | A | U |
| b1392   | paaE  | 1454454 | 1455524 | + | 1070 | 43  | 0  | 0  | 0  | 0  | 0%   | 0%   | 0%   | 0%   | A | A | A | A | U |

|       |      |         |         |   |      |     |     |     |     |     |      |      |      |      |   |   |   |   |   |
|-------|------|---------|---------|---|------|-----|-----|-----|-----|-----|------|------|------|------|---|---|---|---|---|
| b1393 | paaF | 1455521 | 1456288 | + | 767  | 31  | 0   | 0   | 0   | 0   | 0%   | 0%   | 0%   | 0%   | A | A | A | A |   |
| b1394 | paaG | 1456288 | 1457076 | + | 788  | 32  | 0   | 0   | 0   | 0   | 0%   | 0%   | 0%   | 0%   | A | A | A | A |   |
| b1395 | paaH | 1457078 | 1458505 | + | 1427 | 57  | 0   | 0   | 0   | 0   | 0%   | 0%   | 0%   | 0%   | A | A | A | A |   |
| b1396 | paaI | 1458495 | 1458917 | + | 422  | 17  | 0   | 0   | 0   | 0   | 0%   | 0%   | 0%   | 0%   | A | A | A | A | U |
| b1397 | paaJ | 1458917 | 1460122 | + | 1205 | 48  | 7   | 7   | 13  | 13  | 15%  | 15%  | 27%  | 27%  | P | P | P | P | U |
| b1398 | paaK | 1460149 | 1461462 | + | 1313 | 52  | 4   | 4   | 5   | 5   | 8%   | 8%   | 10%  | 10%  | P | P | P | P |   |
| b1399 | paaX | 1461563 | 1462513 | + | 950  | 39  | 37  | 37  | 37  | 38  | 95%  | 95%  | 95%  | 97%  | P | P | P | P |   |
| b1400 | paaY | 1462495 | 1463085 | + | 590  | 23  | 20  | 20  | 23  | 23  | 87%  | 87%  | 100% | 100% | P | P | P | P | U |
| b4492 | ydbA | 1463416 | 1465928 | + | 2512 | 100 | 12  | 15  | 27  | 28  | 12%  | 15%  | 27%  | 28%  | P | P | P | P | U |
| b4492 | ydbA | 1467265 | 1467317 | + | 52   | 2   | 0   | 0   | 2   | 2   | 0%   | 0%   | 100% | 100% | A | A | P | P | U |
| b1404 | insI | 1467382 | 1468533 | + | 1151 | 46  | 44  | 44  | 44  | 44  | 96%  | 96%  | 96%  | 96%  | P | P | P | P |   |
| b4492 | ydbA | 1468541 | 1472037 | + | 3496 | 139 | 128 | 131 | 131 | 131 | 92%  | 94%  | 94%  | 94%  | P | P | P | P | U |
| b1406 | ydbC | 1472245 | 1473105 | + | 860  | 34  | 17  | 17  | 17  | 21  | 50%  | 50%  | 50%  | 62%  | P | P | P | P | U |
| b1407 | ydbD | 1473168 | 1475474 | + | 2306 | 92  | 0   | 0   | 0   | 0   | 0%   | 0%   | 0%   | 0%   | A | A | A | A | U |
| b1408 | ynbA | 1475645 | 1476250 | + | 605  | 25  | 0   | 0   | 0   | 0   | 0%   | 0%   | 0%   | 0%   | A | A | A | A | U |
| b1409 | ynbB | 1476250 | 1477146 | + | 896  | 35  | 0   | 0   | 0   | 0   | 0%   | 0%   | 0%   | 0%   | A | A | A | A | U |
| b1410 | ynbC | 1477162 | 1478919 | + | 1757 | 70  | 0   | 0   | 4   | 4   | 0%   | 0%   | 6%   | 6%   | A | A | P | P | U |
| b1411 | ynbD | 1478933 | 1480225 | + | 1292 | 52  | 4   | 7   | 9   | 9   | 8%   | 13%  | 17%  | 17%  | P | P | P | P | U |
| b1413 | hrpA | 1481085 | 1484987 | + | 3902 | 156 | 148 | 148 | 149 | 149 | 95%  | 95%  | 96%  | 96%  | P | P | P | P |   |
| b1414 | ydcF | 1485259 | 1486059 | + | 800  | 32  | 30  | 30  | 30  | 30  | 94%  | 94%  | 94%  | 94%  | P | P | P | P | U |
| b1415 | aldA | 1486256 | 1487695 | + | 1439 | 58  | 58  | 58  | 58  | 58  | 100% | 100% | 100% | 100% | P | P | P | P |   |
| b1418 | cybB | 1488926 | 1489456 | + | 530  | 21  | 21  | 21  | 21  | 21  | 100% | 100% | 100% | 100% | P | P | P | P |   |
| b1419 | ydcA | 1489701 | 1489874 | + | 173  | 7   | 6   | 6   | 6   | 6   | 86%  | 86%  | 86%  | 86%  | P | P | P | P | U |
| b4429 | sokB | 1490143 | 1490198 | + | 55   | 2   | 0   | 0   | 0   | 0   | 0%   | 0%   | 0%   | 0%   | A | A | A | A |   |
| b1421 | trg  | 1490494 | 1492134 | + | 1640 | 65  | 5   | 5   | 10  | 10  | 8%   | 8%   | 15%  | 15%  | P | P | P | P |   |
| b1423 | ydcJ | 1493312 | 1494655 | + | 1343 | 54  | 8   | 8   | 35  | 35  | 15%  | 15%  | 65%  | 65%  | P | P | P | P | U |
| b1424 | mdoD | 1494880 | 1496535 | + | 1655 | 66  | 58  | 58  | 58  | 59  | 88%  | 88%  | 88%  | 89%  | P | P | P | P |   |
| b1426 | ydcH | 1496675 | 1496899 | + | 224  | 9   | 2   | 4   | 9   | 9   | 22%  | 44%  | 100% | 100% | P | P | P | P | U |
| b1427 | rimL | 1496962 | 1497501 | + | 539  | 21  | 15  | 15  | 15  | 18  | 71%  | 71%  | 71%  | 86%  | P | P | P | P |   |
| b1429 | tehA | 1498597 | 1499589 | + | 992  | 40  | 25  | 25  | 26  | 30  | 63%  | 63%  | 65%  | 75%  | P | P | P | P |   |
| b1430 | tehB | 1499586 | 1500179 | + | 593  | 24  | 24  | 24  | 24  | 24  | 100% | 100% | 100% | 100% | P | P | P | P | U |
| b1431 | ydcL | 1500481 | 1501149 | + | 668  | 26  | 24  | 24  | 26  | 26  | 92%  | 92%  | 100% | 100% | P | P | P | P | U |
| b1432 | ydcM | 1501681 | 1502889 | + | 1208 | 48  | 33  | 33  | 33  | 33  | 69%  | 69%  | 69%  | 69%  | P | P | P | P | U |
| b1434 | ydcN | 1504196 | 1504732 | + | 536  | 22  | 13  | 13  | 14  | 14  | 59%  | 59%  | 64%  | 64%  | P | P | P | P | U |
| b1435 | ydcP | 1504805 | 1506766 | + | 1961 | 79  | 73  | 73  | 74  | 74  | 92%  | 92%  | 94%  | 94%  | P | P | P | P | U |
| b4532 | yncN | 1507310 | 1507486 | + | 176  | 7   | 7   | 7   | 7   | 7   | 100% | 100% | 100% | 100% | P | P | P | P | U |
| b1438 | ydcQ | 1507532 | 1507948 | + | 416  | 17  | 15  | 15  | 17  | 17  | 88%  | 88%  | 100% | 100% | P | P | P | P | U |
| b1439 | ydcR | 1508027 | 1509433 | + | 1406 | 56  | 34  | 34  | 34  | 35  | 61%  | 61%  | 61%  | 63%  | P | P | P | P | U |
| b1440 | ydcS | 1509678 | 1510823 | + | 1145 | 45  | 10  | 12  | 45  | 45  | 22%  | 27%  | 100% | 100% | P | P | P | P | U |
| b1441 | ydcT | 1510841 | 1511854 | + | 1013 | 41  | 3   | 4   | 38  | 41  | 7%   | 10%  | 93%  | 100% | P | P | P | P | U |
| b1442 | ydcU | 1511855 | 1512796 | + | 941  | 37  | 1   | 1   | 19  | 35  | 3%   | 3%   | 51%  | 95%  | P | P | P | P | U |
| b1443 | ydcV | 1512786 | 1513580 | + | 794  | 32  | 5   | 5   | 7   | 31  | 16%  | 16%  | 22%  | 97%  | P | P | P | P | U |
| b1444 | ydcW | 1513602 | 1515026 | + | 1424 | 57  | 31  | 31  | 31  | 57  | 54%  | 54%  | 54%  | 100% | P | P | P | P |   |
| b1445 | ydcX | 1515413 | 1515586 | + | 173  | 7   | 6   | 6   | 6   | 6   | 86%  | 86%  | 86%  | 86%  | P | P | P | P | U |
| b1446 | ydcY | 1515672 | 1515905 | + | 233  | 10  | 10  | 10  | 10  | 10  | 100% | 100% | 100% | 100% | P | P | P | P | U |
| b1449 | yncB | 1517027 | 1518088 | + | 1061 | 42  | 42  | 42  | 42  | 42  | 100% | 100% | 100% | 100% | P | P | P | P | U |

|         |       |         |         |   |      |     |    |    |    |    |      |      |      |      |   |   |   |   |   |
|---------|-------|---------|---------|---|------|-----|----|----|----|----|------|------|------|------|---|---|---|---|---|
| b1450   | yncC  | 1518286 | 1518951 | + | 665  | 27  | 11 | 13 | 13 | 16 | 41%  | 48%  | 48%  | 59%  | P | P | P | P | U |
| b1452   | yncE  | 1521331 | 1522392 | + | 1061 | 42  | 42 | 42 | 42 | 42 | 100% | 100% | 100% | 100% | P | P | P | P | U |
| b1454   | yncG  | 1524271 | 1524888 | + | 617  | 25  | 0  | 1  | 1  | 13 | 0%   | 4%   | 4%   | 52%  | A | P | P | P | U |
| b1455   | yncH  | 1524964 | 1525176 | + | 212  | 9   | 0  | 0  | 0  | 0  | 0%   | 0%   | 0%   | 0%   | A | A | A | A | U |
| b1456   | rhsE  | 1525926 | 1527962 | + | 2036 | 81  | 9  | 9  | 12 | 12 | 11%  | 11%  | 15%  | 15%  | P | P | P | P | U |
| b1457   | ydcD  | 1527946 | 1528428 | + | 482  | 19  | 1  | 2  | 2  | 2  | 5%   | 11%  | 11%  | 11%  | P | P | P | P | U |
| b1459   | yncI  | 1528610 | 1529663 | + | 1053 | 42  | 0  | 0  | 0  | 0  | 0%   | 0%   | 0%   | 0%   | A | A | A | A | U |
| b1460   | ydcC  | 1529840 | 1530976 | + | 1136 | 45  | 0  | 1  | 1  | 1  | 0%   | 2%   | 2%   | 2%   | A | P | P | P | U |
| b1461   | pptA  | 1531076 | 1531309 | + | 233  | 10  | 10 | 10 | 10 | 10 | 100% | 100% | 100% | 100% | P | P | P | P |   |
| b1463   | nhoA  | 1532048 | 1532893 | + | 845  | 34  | 15 | 15 | 18 | 29 | 44%  | 44%  | 53%  | 85%  | P | P | P | P |   |
| b1474   | fdnG  | 1545425 | 1548472 | + | 3047 | 122 | 0  | 9  | 16 | 18 | 0%   | 7%   | 13%  | 15%  | A | P | P | P |   |
| b1475   | fdnH  | 1548485 | 1549369 | + | 884  | 36  | 0  | 0  | 0  | 0  | 0%   | 0%   | 0%   | 0%   | A | A | A | A |   |
| b1476   | fdnI  | 1549362 | 1550015 | + | 653  | 26  | 0  | 0  | 0  | 0  | 0%   | 0%   | 0%   | 0%   | A | A | A | A |   |
| G0-8902 | C0362 | 1550025 | 1550410 | + | 385  | 15  | 0  | 0  | 0  | 0  | 0%   | 0%   | 0%   | 0%   | A | A | A | A |   |
| b1482   | osmC  | 1554649 | 1555080 | + | 431  | 17  | 17 | 17 | 17 | 17 | 100% | 100% | 100% | 100% | P | P | P | P |   |
| b1513   | lsrA  | 1599514 | 1601049 | + | 1535 | 61  | 0  | 0  | 0  | 0  | 0%   | 0%   | 0%   | 0%   | A | A | A | A |   |
| b1514   | lsrC  | 1601043 | 1602071 | + | 1028 | 41  | 0  | 0  | 2  | 2  | 0%   | 0%   | 5%   | 5%   | A | A | P | P |   |
| b1515   | lsrD  | 1602071 | 1603063 | + | 992  | 40  | 0  | 0  | 4  | 5  | 0%   | 0%   | 10%  | 13%  | A | A | P | P |   |
| b1516   | lsrB  | 1603075 | 1604097 | + | 1022 | 41  | 2  | 2  | 5  | 6  | 5%   | 5%   | 12%  | 15%  | P | P | P | P |   |
| b1517   | lsrF  | 1604124 | 1604999 | + | 875  | 35  | 6  | 8  | 8  | 12 | 17%  | 23%  | 23%  | 34%  | P | P | P | P |   |
| b1518   | lsrG  | 1605023 | 1605313 | + | 290  | 12  | 1  | 2  | 2  | 2  | 8%   | 17%  | 17%  | 17%  | P | P | P | P |   |
| b1519   | tam   | 1605370 | 1606128 | + | 758  | 30  | 24 | 25 | 26 | 29 | 80%  | 83%  | 87%  | 97%  | P | P | P | P |   |
| b1526   | yneJ  | 1612828 | 1613709 | + | 881  | 35  | 14 | 14 | 16 | 16 | 40%  | 40%  | 46%  | 46%  | P | P | P | P | U |
| b1527   | yneK  | 1613787 | 1614902 | + | 1115 | 45  | 0  | 0  | 0  | 0  | 0%   | 0%   | 0%   | 0%   | A | A | A | A | U |
| b1528   | ydeA  | 1615052 | 1616242 | + | 1190 | 48  | 42 | 42 | 42 | 44 | 88%  | 88%  | 88%  | 92%  | P | P | P | P | U |
| b1530   | marR  | 1617144 | 1617578 | + | 434  | 17  | 13 | 13 | 13 | 13 | 76%  | 76%  | 76%  | 76%  | P | P | P | P |   |
| b1531   | marA  | 1617598 | 1617981 | + | 383  | 15  | 15 | 15 | 15 | 15 | 100% | 100% | 100% | 100% | P | P | P | P |   |
| b1532   | marB  | 1618013 | 1618231 | + | 218  | 8   | 0  | 2  | 2  | 2  | 0%   | 25%  | 25%  | 25%  | A | P | P | P | U |
| b1534   | ydeE  | 1619356 | 1620543 | + | 1187 | 48  | 0  | 0  | 4  | 6  | 0%   | 0%   | 8%   | 13%  | A | A | P | P | U |
| b4599   | yneM  | 1620670 | 1620765 | + | 95   | 4   | 4  | 4  | 4  | 4  | 100% | 100% | 100% | 100% | P | P | P | P | U |
| b1537   | ydeJ  | 1622797 | 1623315 | + | 518  | 21  | 0  | 3  | 6  | 6  | 0%   | 14%  | 29%  | 29%  | A | P | P | P | U |
| b1539   | ydfG  | 1625541 | 1626287 | + | 746  | 30  | 30 | 30 | 30 | 30 | 100% | 100% | 100% | 100% | P | P | P | P |   |
| b1540   | ydfH  | 1626376 | 1627062 | + | 686  | 28  | 26 | 26 | 26 | 26 | 93%  | 93%  | 93%  | 93%  | P | P | P | P | U |
| b1541   | ydfZ  | 1627239 | 1627442 | + | 203  | 8   | 7  | 8  | 8  | 8  | 88%  | 100% | 100% | 100% | P | P | P | P | U |
| b1544   | ydfK  | 1631063 | 1631329 | + | 266  | 10  | 0  | 2  | 2  | 2  | 0%   | 20%  | 20%  | 20%  | A | P | P | P | U |
| b1545   | pinQ  | 1631646 | 1632236 | + | 590  | 23  | 0  | 0  | 0  | 0  | 0%   | 0%   | 0%   | 0%   | A | A | A | A | U |
| b4533   | ynfO  | 1634780 | 1635013 | + | 233  | 9   | 0  | 0  | 0  | 0  | 0%   | 0%   | 0%   | 0%   | A | A | A | A | U |
| b1549   | ydfO  | 1635071 | 1635481 | + | 410  | 17  | 0  | 0  | 0  | 0  | 0%   | 0%   | 0%   | 0%   | A | A | A | A | U |
| b1558   | cspF  | 1639879 | 1640091 | + | 212  | 9   | 0  | 0  | 0  | 0  | 0%   | 0%   | 0%   | 0%   | A | A | A | A |   |
| b1565   | ydfV  | 1643921 | 1644226 | + | 305  | 12  | 0  | 5  | 5  | 5  | 0%   | 42%  | 42%  | 42%  | A | P | P | P | U |
| b1566   | flxA  | 1644429 | 1644761 | + | 332  | 13  | 0  | 11 | 11 | 11 | 0%   | 85%  | 85%  | 85%  | A | P | P | P | U |
| b1570   | dicA  | 1645958 | 1646365 | + | 407  | 17  | 13 | 13 | 13 | 13 | 76%  | 76%  | 76%  | 76%  | P | P | P | P | U |
| b1571   | ydfA  | 1646532 | 1646687 | + | 155  | 6   | 0  | 2  | 3  | 3  | 0%   | 33%  | 50%  | 50%  | A | P | P | P | U |
| b1572   | ydfB  | 1646689 | 1646817 | + | 128  | 6   | 0  | 0  | 0  | 0  | 0%   | 0%   | 0%   | 0%   | A | A | A | A | U |
| b1573   | rzpQ  | 1646910 | 1647005 | + | 95   | 4   | 0  | 0  | 0  | 0  | 0%   | 0%   | 0%   | 0%   | A | A | A | A | U |
| b1574   | dicF  | 1647406 | 1647458 | + | 52   | 2   | 0  | 0  | 1  | 1  | 0%   | 0%   | 50%  | 50%  | A | A | P | P |   |

|       |      |         |         |   |      |    |    |    |    |    |      |      |      |      |   |   |   |   |   |
|-------|------|---------|---------|---|------|----|----|----|----|----|------|------|------|------|---|---|---|---|---|
| b1575 | dicB | 1647633 | 1647821 | + | 188  | 8  | 0  | 0  | 0  | 0  | 0%   | 0%   | 0%   | 0%   | A | A | A | A |   |
| b1576 | ydfD | 1647818 | 1648009 | + | 191  | 7  | 0  | 0  | 0  | 0  | 0%   | 0%   | 0%   | 0%   | A | A | A | A | U |
| b1577 | ydfE | 1648102 | 1648866 | + | 764  | 31 | 0  | 0  | 0  | 0  | 0%   | 0%   | 0%   | 0%   | A | A | A | A | U |
| b1578 | insD | 1648869 | 1649561 | + | 692  | 27 | 27 | 27 | 27 | 27 | 100% | 100% | 100% | 100% | P | P | P | P | U |
| b1579 | intQ | 1649575 | 1650732 | + | 1157 | 46 | 0  | 3  | 3  | 3  | 0%   | 7%   | 7%   | 7%   | A | P | P | P | U |
| b1583 | ynfB | 1653832 | 1654173 | + | 341  | 14 | 14 | 14 | 14 | 14 | 100% | 100% | 100% | 100% | P | P | P | P | U |
| b1584 | speG | 1654208 | 1654768 | + | 560  | 22 | 22 | 22 | 22 | 22 | 100% | 100% | 100% | 100% | P | P | P | P |   |
| b1586 | ynfD | 1655589 | 1655894 | + | 305  | 12 | 10 | 10 | 11 | 11 | 83%  | 83%  | 92%  | 92%  | P | P | P | P | U |
| b1587 | ynfE | 1656093 | 1658519 | + | 2426 | 97 | 5  | 29 | 41 | 50 | 5%   | 30%  | 42%  | 52%  | P | P | P | P |   |
| b1588 | ynfF | 1658580 | 1661003 | + | 2423 | 97 | 27 | 27 | 28 | 30 | 28%  | 28%  | 29%  | 31%  | P | P | P | P |   |
| b1589 | ynfG | 1661014 | 1661631 | + | 617  | 25 | 8  | 8  | 9  | 9  | 32%  | 32%  | 36%  | 36%  | P | P | P | P |   |
| b1590 | ynfH | 1661633 | 1662487 | + | 854  | 34 | 13 | 14 | 16 | 17 | 38%  | 41%  | 47%  | 50%  | P | P | P | P |   |
| b1591 | dmsD | 1662530 | 1663144 | + | 614  | 24 | 21 | 21 | 21 | 22 | 88%  | 88%  | 88%  | 92%  | P | P | P | P |   |
| b1592 | clcB | 1663339 | 1664595 | + | 1256 | 51 | 2  | 2  | 3  | 3  | 4%   | 4%   | 6%   | 6%   | P | P | P | P | U |
| b1596 | ynfM | 1667723 | 1668976 | + | 1253 | 50 | 11 | 11 | 11 | 47 | 22%  | 22%  | 22%  | 94%  | P | P | P | P | U |
| b1597 | asr  | 1669400 | 1669708 | + | 308  | 12 | 6  | 6  | 7  | 11 | 50%  | 50%  | 58%  | 92%  | P | P | P | P |   |
| b4601 | ydgU | 1669801 | 1669884 | + | 83   | 3  | 0  | 0  | 0  | 0  | 0%   | 0%   | 0%   | 0%   | A | A | A | A | U |
| b1598 | ydgD | 1669984 | 1670805 | + | 821  | 33 | 27 | 27 | 33 | 33 | 82%  | 82%  | 100% | 100% | P | P | P | P | U |
| b1601 | tqsA | 1671937 | 1672971 | + | 1034 | 42 | 3  | 27 | 27 | 27 | 7%   | 64%  | 64%  | 64%  | P | P | P | P | U |
| b1604 | ydgH | 1676451 | 1677395 | + | 944  | 38 | 36 | 36 | 36 | 36 | 95%  | 95%  | 95%  | 95%  | P | P | P | P | U |
| b1605 | ydgI | 1677581 | 1678963 | + | 1382 | 55 | 4  | 7  | 8  | 10 | 7%   | 13%  | 15%  | 18%  | P | P | P | P | U |
| b1606 | folM | 1679000 | 1679722 | + | 722  | 29 | 20 | 20 | 20 | 24 | 69%  | 69%  | 69%  | 83%  | P | P | P | P |   |
| b1608 | rstA | 1680183 | 1680902 | + | 719  | 29 | 29 | 29 | 29 | 29 | 100% | 100% | 100% | 100% | P | P | P | P |   |
| b1609 | rstB | 1680906 | 1682207 | + | 1301 | 52 | 44 | 44 | 44 | 51 | 85%  | 85%  | 85%  | 98%  | P | P | P | P |   |
| b1610 | tus  | 1682283 | 1683212 | + | 929  | 37 | 33 | 33 | 37 | 37 | 89%  | 89%  | 100% | 100% | P | P | P | P |   |
| b1613 | manA | 1686600 | 1687775 | + | 1175 | 47 | 45 | 45 | 45 | 45 | 96%  | 96%  | 96%  | 96%  | P | P | P | P |   |
| b1614 | ydgA | 1687876 | 1689384 | + | 1508 | 60 | 60 | 60 | 60 | 60 | 100% | 100% | 100% | 100% | P | P | P | P | U |
| b1621 | malX | 1697379 | 1698971 | + | 1592 | 64 | 3  | 38 | 38 | 38 | 5%   | 59%  | 59%  | 59%  | P | P | P | P |   |
| b1622 | malY | 1698981 | 1700153 | + | 1172 | 47 | 35 | 35 | 35 | 35 | 74%  | 74%  | 74%  | 74%  | P | P | P | P |   |
| b1623 | add  | 1700257 | 1701258 | + | 1001 | 40 | 30 | 30 | 30 | 30 | 75%  | 75%  | 75%  | 75%  | P | P | P | P |   |
| b4409 | blr  | 1702575 | 1702700 | + | 125  | 5  | 5  | 5  | 5  | 5  | 100% | 100% | 100% | 100% | P | P | P | P |   |
| b1625 | cnu  | 1702973 | 1703188 | + | 215  | 8  | 7  | 7  | 7  | 7  | 88%  | 88%  | 88%  | 88%  | P | P | P | P | U |
| b1626 | ydgK | 1703274 | 1703714 | + | 440  | 17 | 15 | 15 | 15 | 15 | 88%  | 88%  | 88%  | 88%  | P | P | P | P | U |
| b1627 | rsxA | 1703791 | 1704372 | + | 581  | 24 | 22 | 22 | 22 | 22 | 92%  | 92%  | 92%  | 92%  | P | P | P | P | U |
| b1628 | rsxB | 1704372 | 1704950 | + | 578  | 23 | 23 | 23 | 23 | 23 | 100% | 100% | 100% | 100% | P | P | P | P | U |
| b1629 | rsxC | 1704943 | 1707165 | + | 2222 | 89 | 88 | 88 | 88 | 88 | 99%  | 99%  | 99%  | 99%  | P | P | P | P | U |
| b1630 | rsxD | 1707166 | 1708224 | + | 1058 | 43 | 42 | 42 | 42 | 42 | 98%  | 98%  | 98%  | 98%  | P | P | P | P | U |
| b1631 | rsxG | 1708228 | 1708848 | + | 620  | 25 | 24 | 24 | 24 | 24 | 96%  | 96%  | 96%  | 96%  | P | P | P | P | U |
| b1632 | rsxE | 1708852 | 1709547 | + | 695  | 28 | 25 | 25 | 25 | 25 | 89%  | 89%  | 89%  | 89%  | P | P | P | P | U |
| b1633 | nth  | 1709547 | 1710182 | + | 635  | 25 | 22 | 22 | 22 | 22 | 88%  | 88%  | 88%  | 88%  | P | P | P | P |   |
| b1634 | tppB | 1710793 | 1712295 | + | 1502 | 60 | 8  | 16 | 16 | 16 | 13%  | 27%  | 27%  | 27%  | P | P | P | P | U |
| b1635 | gst  | 1712401 | 1713006 | + | 605  | 24 | 24 | 24 | 24 | 24 | 100% | 100% | 100% | 100% | P | P | P | P |   |
| b1641 | slyB | 1717900 | 1718367 | + | 467  | 18 | 18 | 18 | 18 | 18 | 100% | 100% | 100% | 100% | P | P | P | P |   |
| b1643 | ydhI | 1719049 | 1719285 | + | 236  | 9  | 2  | 4  | 4  | 4  | 22%  | 44%  | 44%  | 44%  | P | P | P | P | U |
| b1644 | ydhJ | 1719288 | 1720145 | + | 857  | 34 | 3  | 3  | 3  | 3  | 9%   | 9%   | 9%   | 9%   | P | P | P | P |   |
| b1645 | ydhK | 1720145 | 1722157 | + | 2012 | 81 | 3  | 3  | 7  | 7  | 4%   | 4%   | 9%   | 9%   | P | P | P | P | U |

|       |      |         |         |   |      |     |    |    |    |    |      |      |      |      |   |   |   |   |   |
|-------|------|---------|---------|---|------|-----|----|----|----|----|------|------|------|------|---|---|---|---|---|
| b1649 | ydhM | 1724047 | 1724646 | + | 599  | 24  | 9  | 9  | 9  | 10 | 38%  | 38%  | 38%  | 42%  | P | P | P | P | U |
| b1650 | nemA | 1724683 | 1725780 | + | 1097 | 44  | 35 | 35 | 35 | 35 | 80%  | 80%  | 80%  | 80%  | P | P | P | P |   |
| b1651 | gloA | 1725861 | 1726268 | + | 407  | 16  | 16 | 16 | 16 | 16 | 100% | 100% | 100% | 100% | P | P | P | P |   |
| b1652 | rnt  | 1726371 | 1727018 | + | 647  | 26  | 24 | 24 | 24 | 25 | 92%  | 92%  | 92%  | 96%  | P | P | P | P |   |
| b1653 | lhr  | 1727111 | 1731727 | + | 4616 | 185 | 48 | 48 | 50 | 62 | 26%  | 26%  | 27%  | 34%  | P | P | P | P | U |
| b1655 | ydhO | 1732459 | 1733274 | + | 815  | 33  | 31 | 31 | 31 | 31 | 94%  | 94%  | 94%  | 94%  | P | P | P | P | U |
| b1656 | sodB | 1733402 | 1733983 | + | 581  | 23  | 23 | 23 | 23 | 23 | 100% | 100% | 100% | 100% | P | P | P | P |   |
| b1658 | purR | 1735868 | 1736893 | + | 1025 | 41  | 41 | 41 | 41 | 41 | 100% | 100% | 100% | 100% | P | P | P | P |   |
| b1660 | ydhC | 1737935 | 1739146 | + | 1211 | 49  | 16 | 16 | 16 | 17 | 33%  | 33%  | 33%  | 35%  | P | P | P | P | U |
| b1661 | cfa  | 1739437 | 1740585 | + | 1148 | 46  | 45 | 45 | 45 | 46 | 98%  | 98%  | 98%  | 100% | P | P | P | P |   |
| b1663 | mdtK | 1741481 | 1742854 | + | 1373 | 55  | 51 | 52 | 52 | 52 | 93%  | 95%  | 95%  | 95%  | P | P | P | P |   |
| b1665 | valV | 1744459 | 1744535 | + | 76   | 3   | 3  | 3  | 3  | 3  | 100% | 100% | 100% | 100% | P | P | P | P |   |
| b1666 | valW | 1744540 | 1744616 | + | 76   | 4   | 3  | 3  | 3  | 3  | 75%  | 75%  | 75%  | 75%  | P | P | P | P |   |
| b1667 | ydhR | 1744724 | 1745029 | + | 305  | 12  | 11 | 11 | 11 | 11 | 92%  | 92%  | 92%  | 92%  | P | P | P | P | U |
| b1668 | ydhS | 1745155 | 1746759 | + | 1604 | 64  | 47 | 47 | 52 | 55 | 73%  | 73%  | 81%  | 86%  | P | P | P | P | U |
| b1676 | pykF | 1753722 | 1755134 | + | 1412 | 56  | 56 | 56 | 56 | 56 | 100% | 100% | 100% | 100% | P | P | P | P |   |
| b1677 | lpp  | 1755445 | 1755681 | + | 236  | 9   | 9  | 9  | 9  | 9  | 100% | 100% | 100% | 100% | P | P | P | P |   |
| b1688 | ydiK | 1767098 | 1768210 | + | 1112 | 44  | 38 | 38 | 40 | 40 | 86%  | 86%  | 91%  | 91%  | P | P | P | P | U |
| b4431 | rprA | 1768396 | 1768501 | + | 105  | 4   | 0  | 0  | 0  | 0  | 0%   | 0%   | 0%   | 0%   | A | A | A | A |   |
| b1689 | ydiL | 1768639 | 1768995 | + | 356  | 15  | 0  | 0  | 3  | 3  | 0%   | 0%   | 20%  | 20%  | A | A | P | P | U |
| b1690 | ydiM | 1769095 | 1770309 | + | 1214 | 49  | 0  | 0  | 1  | 1  | 0%   | 0%   | 2%   | 2%   | A | A | P | P | U |
| b1691 | ydiN | 1770530 | 1771801 | + | 1271 | 51  | 0  | 0  | 2  | 2  | 0%   | 0%   | 4%   | 4%   | A | A | P | P | U |
| b1692 | ydiB | 1771813 | 1772679 | + | 866  | 35  | 3  | 3  | 4  | 4  | 9%   | 9%   | 11%  | 11%  | P | P | P | P |   |
| b1693 | aroD | 1772710 | 1773468 | + | 758  | 30  | 29 | 29 | 29 | 29 | 97%  | 97%  | 97%  | 97%  | P | P | P | P |   |
| b1694 | ydiF | 1773611 | 1775206 | + | 1595 | 64  | 0  | 0  | 5  | 5  | 0%   | 0%   | 8%   | 8%   | A | A | P | P | U |
| b1695 | ydiO | 1775220 | 1776371 | + | 1151 | 47  | 0  | 0  | 1  | 1  | 0%   | 0%   | 2%   | 2%   | A | A | P | P | U |
| b1697 | ydiQ | 1777641 | 1778405 | + | 764  | 31  | 0  | 0  | 3  | 3  | 0%   | 0%   | 10%  | 10%  | A | A | P | P | U |
| b1698 | ydiR | 1778425 | 1779363 | + | 938  | 37  | 0  | 0  | 7  | 7  | 0%   | 0%   | 19%  | 19%  | A | A | P | P | U |
| b1699 | ydiS | 1779419 | 1780708 | + | 1289 | 52  | 0  | 0  | 2  | 2  | 0%   | 0%   | 4%   | 4%   | A | A | P | P | U |
| b1700 | ydiT | 1780705 | 1780998 | + | 293  | 12  | 0  | 0  | 0  | 0  | 0%   | 0%   | 0%   | 0%   | A | A | A | A | U |
| b1701 | fadK | 1781055 | 1782701 | + | 1646 | 66  | 0  | 0  | 3  | 3  | 0%   | 0%   | 5%   | 5%   | A | A | P | P |   |
| b1703 | ydiA | 1785469 | 1786302 | + | 833  | 34  | 34 | 34 | 34 | 34 | 100% | 100% | 100% | 100% | P | P | P | P | U |
| b1704 | aroH | 1786459 | 1787505 | + | 1046 | 42  | 41 | 41 | 41 | 41 | 98%  | 98%  | 98%  | 98%  | P | P | P | P |   |
| b1705 | ydiE | 1787637 | 1787828 | + | 191  | 8   | 1  | 1  | 1  | 4  | 13%  | 13%  | 13%  | 50%  | P | P | P | P | U |
| b4494 | arpB | 1801118 | 1803017 | + | 1899 | 76  | 0  | 0  | 0  | 0  | 0%   | 0%   | 0%   | 0%   | A | A | A | A | U |
| b4535 | yniD | 1803189 | 1803296 | + | 107  | 4   | 3  | 3  | 3  | 3  | 75%  | 75%  | 75%  | 75%  | P | P | P | P | U |
| b1723 | pfkB | 1804394 | 1805323 | + | 929  | 38  | 38 | 38 | 38 | 38 | 100% | 100% | 100% | 100% | P | P | P | P |   |
| b1724 | ydiZ | 1805424 | 1805714 | + | 290  | 11  | 10 | 10 | 10 | 11 | 91%  | 91%  | 91%  | 100% | P | P | P | P | U |
| b1725 | yniA | 1805820 | 1806680 | + | 860  | 35  | 34 | 34 | 35 | 35 | 97%  | 97%  | 100% | 100% | P | P | P | P | U |
| b1727 | yniC | 1807404 | 1808072 | + | 668  | 27  | 26 | 26 | 26 | 26 | 96%  | 96%  | 96%  | 96%  | P | P | P | P | U |
| b1728 | ydjM | 1808223 | 1808825 | + | 602  | 24  | 0  | 1  | 9  | 10 | 0%   | 4%   | 38%  | 42%  | A | P | P | P | U |
| b1729 | ydjN | 1808958 | 1810349 | + | 1391 | 56  | 56 | 56 | 56 | 56 | 100% | 100% | 100% | 100% | P | P | P | P | U |
| b1732 | katE | 1811891 | 1814152 | + | 2261 | 90  | 89 | 89 | 89 | 90 | 99%  | 99%  | 99%  | 100% | P | P | P | P |   |
| b1740 | nadE | 1820482 | 1821309 | + | 827  | 33  | 33 | 33 | 33 | 33 | 100% | 100% | 100% | 100% | P | P | P | P |   |
| b1741 | cho  | 1821539 | 1822426 | + | 887  | 35  | 24 | 24 | 24 | 24 | 69%  | 69%  | 69%  | 69%  | P | P | P | P |   |
| b1749 | xthA | 1830452 | 1831258 | + | 806  | 32  | 31 | 31 | 31 | 31 | 97%  | 97%  | 97%  | 97%  | P | P | P | P |   |

|       |      |         |         |   |      |     |    |    |    |    |      |      |      |      |   |   |   |   |   |
|-------|------|---------|---------|---|------|-----|----|----|----|----|------|------|------|------|---|---|---|---|---|
| b1750 | ydjX | 1831425 | 1832135 | + | 710  | 29  | 0  | 0  | 0  | 26 | 0%   | 0%   | 0%   | 90%  | A | A | A | P | U |
| b1751 | ydjY | 1832140 | 1832817 | + | 677  | 27  | 1  | 12 | 12 | 20 | 4%   | 44%  | 44%  | 74%  | P | P | P | P | U |
| b1752 | ydjZ | 1832832 | 1833539 | + | 707  | 29  | 2  | 7  | 9  | 12 | 7%   | 24%  | 31%  | 41%  | P | P | P | P | U |
| b1753 | ynjA | 1833539 | 1834087 | + | 548  | 22  | 13 | 13 | 13 | 16 | 59%  | 59%  | 59%  | 73%  | P | P | P | P | U |
| b1754 | ynjB | 1834097 | 1835263 | + | 1166 | 47  | 20 | 20 | 20 | 23 | 43%  | 43%  | 43%  | 49%  | P | P | P | P | U |
| b1755 | ynjC | 1835236 | 1836771 | + | 1535 | 61  | 4  | 4  | 10 | 10 | 7%   | 7%   | 16%  | 16%  | P | P | P | P |   |
| b1756 | ynjD | 1836771 | 1837424 | + | 653  | 26  | 4  | 4  | 4  | 5  | 15%  | 15%  | 15%  | 19%  | P | P | P | P | U |
| b1757 | ynjE | 1837491 | 1838798 | + | 1307 | 52  | 27 | 27 | 28 | 43 | 52%  | 52%  | 54%  | 83%  | P | P | P | P | U |
| b1759 | nudG | 1839514 | 1839921 | + | 407  | 16  | 9  | 9  | 9  | 9  | 56%  | 56%  | 56%  | 56%  | P | P | P | P |   |
| b1761 | gdhA | 1840395 | 1841738 | + | 1343 | 54  | 54 | 54 | 54 | 54 | 100% | 100% | 100% | 100% | P | P | P | P |   |
| b1766 | sppA | 1846861 | 1848717 | + | 1856 | 74  | 71 | 71 | 71 | 71 | 96%  | 96%  | 96%  | 96%  | P | P | P | P |   |
| b1767 | ansA | 1848884 | 1849900 | + | 1016 | 41  | 41 | 41 | 41 | 41 | 100% | 100% | 100% | 100% | P | P | P | P |   |
| b1768 | pncA | 1849911 | 1850552 | + | 641  | 25  | 25 | 25 | 25 | 25 | 100% | 100% | 100% | 100% | P | P | P | P |   |
| b1779 | gapA | 1860795 | 1861790 | + | 995  | 40  | 40 | 40 | 40 | 40 | 100% | 100% | 100% | 100% | P | P | P | P |   |
| b1780 | yeaD | 1861874 | 1862758 | + | 884  | 35  | 34 | 34 | 34 | 34 | 97%  | 97%  | 97%  | 97%  | P | P | P | P | U |
| b1783 | yeaG | 1864932 | 1866866 | + | 1934 | 77  | 77 | 77 | 77 | 77 | 100% | 100% | 100% | 100% | P | P | P | P | U |
| b1784 | yeaH | 1866979 | 1868262 | + | 1283 | 51  | 35 | 35 | 51 | 51 | 69%  | 69%  | 100% | 100% | P | P | P | P | U |
| b1785 | yeaI | 1868409 | 1869884 | + | 1475 | 59  | 0  | 0  | 15 | 15 | 0%   | 0%   | 25%  | 25%  | A | A | P | P | U |
| b1786 | yeaJ | 1870065 | 1871555 | + | 1490 | 60  | 9  | 21 | 21 | 21 | 15%  | 35%  | 35%  | 35%  | P | P | P | P | U |
| b1787 | yeaK | 1871598 | 1872101 | + | 503  | 20  | 20 | 20 | 20 | 20 | 100% | 100% | 100% | 100% | P | P | P | P | U |
| b1789 | yeaL | 1872376 | 1872822 | + | 446  | 18  | 6  | 6  | 6  | 6  | 33%  | 33%  | 33%  | 33%  | P | P | P | P | U |
| b1791 | yeaN | 1873697 | 1874878 | + | 1181 | 47  | 0  | 1  | 1  | 1  | 0%   | 2%   | 2%   | 2%   | A | P | P | P | U |
| b1792 | yeaO | 1874933 | 1875280 | + | 347  | 14  | 12 | 12 | 13 | 13 | 86%  | 86%  | 93%  | 93%  | P | P | P | P | U |
| b1794 | yeaP | 1875739 | 1876764 | + | 1025 | 41  | 40 | 40 | 40 | 40 | 98%  | 98%  | 98%  | 98%  | P | P | P | P | U |
| b1800 | yeaU | 1879936 | 1881021 | + | 1085 | 44  | 7  | 7  | 7  | 7  | 16%  | 16%  | 16%  | 16%  | P | P | P | P | U |
| b1801 | yeaV | 1881212 | 1882657 | + | 1445 | 58  | 2  | 2  | 2  | 2  | 3%   | 3%   | 3%   | 3%   | P | P | P | P | U |
| b1802 | yeaW | 1882689 | 1883813 | + | 1124 | 45  | 0  | 0  | 0  | 0  | 0%   | 0%   | 0%   | 0%   | A | A | A | A | U |
| b1803 | yeaX | 1883869 | 1884834 | + | 965  | 38  | 0  | 0  | 0  | 0  | 0%   | 0%   | 0%   | 0%   | A | A | A | A | U |
| b1809 | yoaB | 1891391 | 1891735 | + | 344  | 14  | 14 | 14 | 14 | 14 | 100% | 100% | 100% | 100% | P | P | P | P | U |
| b1810 | yoaC | 1892097 | 1892456 | + | 359  | 14  | 12 | 12 | 14 | 14 | 86%  | 86%  | 100% | 100% | P | P | P | P | U |
| b1812 | pabB | 1892829 | 1894190 | + | 1361 | 54  | 52 | 52 | 52 | 52 | 96%  | 96%  | 96%  | 96%  | P | P | P | P |   |
| b1813 | nudL | 1894194 | 1894772 | + | 578  | 24  | 21 | 21 | 21 | 21 | 88%  | 88%  | 88%  | 88%  | P | P | P | P | U |
| b1814 | sdaA | 1894956 | 1896320 | + | 1364 | 55  | 33 | 55 | 55 | 55 | 60%  | 100% | 100% | 100% | P | P | P | P |   |
| b1815 | yoaD | 1896451 | 1898049 | + | 1598 | 64  | 0  | 0  | 6  | 15 | 0%   | 0%   | 9%   | 23%  | A | A | P | P | U |
| b1817 | manX | 1900072 | 1901043 | + | 971  | 38  | 38 | 38 | 38 | 38 | 100% | 100% | 100% | 100% | P | P | P | P |   |
| b1818 | manY | 1901106 | 1901906 | + | 800  | 32  | 32 | 32 | 32 | 32 | 100% | 100% | 100% | 100% | P | P | P | P |   |
| b1819 | manZ | 1901910 | 1902770 | + | 860  | 35  | 35 | 35 | 35 | 35 | 100% | 100% | 100% | 100% | P | P | P | P |   |
| b1820 | yobD | 1902825 | 1903283 | + | 458  | 18  | 6  | 6  | 6  | 6  | 33%  | 33%  | 33%  | 33%  | P | P | P | P | U |
| b1821 | yebN | 1903712 | 1904278 | + | 566  | 23  | 0  | 5  | 5  | 5  | 0%   | 22%  | 22%  | 22%  | A | P | P | P | U |
| b4536 | yobH | 1906949 | 1907188 | + | 239  | 9   | 5  | 5  | 5  | 5  | 56%  | 56%  | 56%  | 56%  | P | P | P | P | U |
| b1828 | yebQ | 1908300 | 1909673 | + | 1373 | 55  | 0  | 0  | 0  | 0  | 0%   | 0%   | 0%   | 0%   | A | A | A | A | U |
| b1833 | yebS | 1914282 | 1915565 | + | 1283 | 51  | 19 | 21 | 21 | 26 | 37%  | 41%  | 41%  | 51%  | P | P | P | P | U |
| b1834 | yebT | 1915534 | 1918167 | + | 2633 | 105 | 83 | 83 | 83 | 87 | 79%  | 79%  | 79%  | 83%  | P | P | P | P | U |
| b1835 | rsmF | 1918247 | 1919686 | + | 1439 | 57  | 45 | 45 | 45 | 45 | 79%  | 79%  | 79%  | 79%  | P | P | P | P | U |
| b1836 | yebV | 1919804 | 1920040 | + | 236  | 9   | 8  | 8  | 9  | 9  | 89%  | 89%  | 100% | 100% | P | P | P | P | U |
| b1837 | yebW | 1920145 | 1920336 | + | 191  | 8   | 7  | 7  | 8  | 8  | 88%  | 88%  | 100% | 100% | P | P | P | P | U |

|         |       |         |         |   |      |    |    |    |    |    |      |      |      |      |   |   |   |   |   |
|---------|-------|---------|---------|---|------|----|----|----|----|----|------|------|------|------|---|---|---|---|---|
| b4432   | ryeA  | 1921090 | 1921338 | + | 248  | 10 | 9  | 9  | 9  | 9  | 90%  | 90%  | 90%  | 90%  | P | P | P | P | U |
| b1842   | holE  | 1923132 | 1923362 | + | 230  | 9  | 9  | 9  | 9  | 9  | 100% | 100% | 100% | 100% | P | P | P | P |   |
| b1843   | yobB  | 1923464 | 1924120 | + | 656  | 26 | 20 | 20 | 20 | 20 | 77%  | 77%  | 77%  | 77%  | P | P | P | P | U |
| b1844   | exoX  | 1924144 | 1924806 | + | 662  | 27 | 22 | 22 | 22 | 23 | 81%  | 81%  | 81%  | 85%  | P | P | P | P |   |
| b1849   | purT  | 1928905 | 1930083 | + | 1178 | 47 | 47 | 47 | 47 | 47 | 100% | 100% | 100% | 100% | P | P | P | P |   |
| b1853   | yebK  | 1934676 | 1935545 | + | 869  | 34 | 34 | 34 | 34 | 34 | 100% | 100% | 100% | 100% | P | P | P | P | U |
| b1854   | pykA  | 1935673 | 1937115 | + | 1442 | 58 | 58 | 58 | 58 | 58 | 100% | 100% | 100% | 100% | P | P | P | P |   |
| b1858   | znuC  | 1940686 | 1941441 | + | 755  | 30 | 30 | 30 | 30 | 30 | 100% | 100% | 100% | 100% | P | P | P | P |   |
| b1859   | znuB  | 1941438 | 1942223 | + | 785  | 31 | 31 | 31 | 31 | 31 | 100% | 100% | 100% | 100% | P | P | P | P |   |
| b1862   | yebB  | 1944275 | 1944877 | + | 602  | 24 | 0  | 0  | 0  | 0  | 0%   | 0%   | 0%   | 0%   | A | A | A | A | U |
| b1867   | yecD  | 1948856 | 1949422 | + | 566  | 22 | 21 | 21 | 21 | 22 | 95%  | 95%  | 95%  | 100% | P | P | P | P | U |
| b1868   | yecE  | 1949419 | 1950237 | + | 818  | 33 | 23 | 23 | 23 | 23 | 70%  | 70%  | 70%  | 70%  | P | P | P | P | U |
| b1869   | yecN  | 1950290 | 1950685 | + | 395  | 16 | 16 | 16 | 16 | 16 | 100% | 100% | 100% | 100% | P | P | P | P | U |
| b1870   | cmoA  | 1950726 | 1951469 | + | 743  | 29 | 29 | 29 | 29 | 29 | 100% | 100% | 100% | 100% | P | P | P | P | U |
| b1871   | cmoB  | 1951466 | 1952437 | + | 971  | 39 | 37 | 37 | 37 | 37 | 95%  | 95%  | 95%  | 95%  | P | P | P | P | U |
| b1876   | argS  | 1958086 | 1959819 | + | 1733 | 69 | 69 | 69 | 69 | 69 | 100% | 100% | 100% | 100% | P | P | P | P |   |
| b1877   | yecT  | 1959996 | 1960484 | + | 488  | 20 | 0  | 0  | 0  | 0  | 0%   | 0%   | 0%   | 0%   | A | A | A | A | U |
| GO-8903 | C0465 | 1970763 | 1970840 | + | 77   | 3  | 0  | 0  | 0  | 0  | 0%   | 0%   | 0%   | 0%   | A | A | A | A |   |
| b1895   | uspC  | 1977777 | 1978205 | + | 428  | 17 | 7  | 12 | 12 | 12 | 41%  | 71%  | 71%  | 71%  | P | P | P | P |   |
| b1902   | ftnB  | 1984949 | 1985452 | + | 503  | 21 | 18 | 19 | 19 | 19 | 86%  | 90%  | 90%  | 90%  | P | P | P | P | U |
| b1904   | yecR  | 1986246 | 1986569 | + | 323  | 13 | 0  | 0  | 0  | 0  | 0%   | 0%   | 0%   | 0%   | A | A | A | A | U |
| b1905   | ftnA  | 1986740 | 1987237 | + | 497  | 20 | 20 | 20 | 20 | 20 | 100% | 100% | 100% | 100% | P | P | P | P |   |
| b1907   | tyrP  | 1987705 | 1988916 | + | 1211 | 48 | 36 | 36 | 41 | 41 | 75%  | 75%  | 85%  | 85%  | P | P | P | P |   |
| b1915   | yecF  | 1993842 | 1994066 | + | 224  | 9  | 7  | 7  | 7  | 7  | 78%  | 78%  | 78%  | 78%  | P | P | P | P | U |
| b1924   | fliD  | 2001896 | 2003302 | + | 1406 | 57 | 2  | 2  | 2  | 2  | 4%   | 4%   | 4%   | 4%   | P | P | P | P |   |
| b1925   | fliS  | 2003327 | 2003737 | + | 410  | 16 | 0  | 0  | 0  | 0  | 0%   | 0%   | 0%   | 0%   | A | A | A | A |   |
| b1926   | fliT  | 2003737 | 2004102 | + | 365  | 15 | 0  | 0  | 0  | 0  | 0%   | 0%   | 0%   | 0%   | A | A | A | A | U |
| b1927   | amyA  | 2004180 | 2005667 | + | 1487 | 59 | 59 | 59 | 59 | 59 | 100% | 100% | 100% | 100% | P | P | P | P |   |
| b1929   | yedE  | 2006301 | 2007506 | + | 1205 | 48 | 48 | 48 | 48 | 48 | 100% | 100% | 100% | 100% | P | P | P | P | U |
| b1930   | yedF  | 2007503 | 2007736 | + | 233  | 9  | 9  | 9  | 9  | 9  | 100% | 100% | 100% | 100% | P | P | P | P | U |
| b1931   | yedK  | 2007845 | 2008513 | + | 668  | 27 | 4  | 6  | 24 | 24 | 15%  | 22%  | 89%  | 89%  | P | P | P | P | U |
| b1932   | yedL  | 2008624 | 2009103 | + | 479  | 19 | 5  | 5  | 7  | 19 | 26%  | 26%  | 37%  | 100% | P | P | P | P | U |
| b1936   | intG  | 2010526 | 2010687 | + | 161  | 6  | 0  | 0  | 0  | 0  | 0%   | 0%   | 0%   | 0%   | A | A | A | A | U |
| b1938   | fliF  | 2011253 | 2012911 | + | 1658 | 66 | 0  | 0  | 3  | 3  | 0%   | 0%   | 5%   | 5%   | A | A | P | P |   |
| b1939   | fliG  | 2012904 | 2013899 | + | 995  | 40 | 0  | 0  | 2  | 2  | 0%   | 0%   | 5%   | 5%   | A | A | P | P |   |
| b1940   | fliH  | 2013892 | 2014578 | + | 686  | 28 | 0  | 0  | 0  | 0  | 0%   | 0%   | 0%   | 0%   | A | A | A | A |   |
| b1941   | fliI  | 2014578 | 2015951 | + | 1373 | 55 | 0  | 0  | 1  | 1  | 0%   | 0%   | 2%   | 2%   | A | A | P | P |   |
| b1942   | fliJ  | 2015970 | 2016413 | + | 443  | 18 | 0  | 0  | 0  | 0  | 0%   | 0%   | 0%   | 0%   | A | A | A | A |   |
| b1943   | fliK  | 2016410 | 2017537 | + | 1127 | 45 | 0  | 5  | 6  | 6  | 0%   | 11%  | 13%  | 13%  | A | P | P | P |   |
| b1944   | fliL  | 2017642 | 2018106 | + | 464  | 19 | 0  | 0  | 1  | 1  | 0%   | 0%   | 5%   | 5%   | A | A | P | P |   |
| b1945   | fliM  | 2018111 | 2019115 | + | 1004 | 40 | 0  | 0  | 4  | 4  | 0%   | 0%   | 10%  | 10%  | A | A | P | P |   |
| b1946   | fliN  | 2019112 | 2019525 | + | 413  | 17 | 0  | 0  | 0  | 0  | 0%   | 0%   | 0%   | 0%   | A | A | A | A |   |
| b1947   | fliO  | 2019528 | 2019893 | + | 365  | 14 | 0  | 0  | 0  | 0  | 0%   | 0%   | 0%   | 0%   | A | A | A | A |   |
| b1948   | fliP  | 2019893 | 2020630 | + | 737  | 30 | 0  | 0  | 0  | 0  | 0%   | 0%   | 0%   | 0%   | A | A | A | A |   |
| b1949   | fliQ  | 2020640 | 2020909 | + | 269  | 11 | 0  | 0  | 0  | 0  | 0%   | 0%   | 0%   | 0%   | A | A | A | A |   |
| b1950   | fliR  | 2020917 | 2021702 | + | 785  | 32 | 0  | 0  | 0  | 0  | 0%   | 0%   | 0%   | 0%   | A | A | A | A |   |

|       |      |         |         |   |      |     |     |     |     |     |      |      |      |      |   |   |   |   |   |
|-------|------|---------|---------|---|------|-----|-----|-----|-----|-----|------|------|------|------|---|---|---|---|---|
| b1951 | rcsA | 2021992 | 2022615 | + | 623  | 25  | 0   | 0   | 0   | 0   | 0%   | 0%   | 0%   | 0%   | A | A | A | A |   |
| b1953 | yodD | 2023010 | 2023237 | + | 227  | 9   | 8   | 9   | 9   | 9   | 89%  | 100% | 100% | 100% | P | P | P | P | U |
| b1955 | yedP | 2023535 | 2024350 | + | 815  | 32  | 25  | 27  | 32  | 32  | 78%  | 84%  | 100% | 100% | P | P | P | P | U |
| b1959 | yedA | 2027563 | 2028483 | + | 920  | 37  | 0   | 0   | 0   | 0   | 0%   | 0%   | 0%   | 0%   | A | A | A | A | U |
| b4603 | rseX | 2031673 | 2031763 | + | 90   | 4   | 0   | 0   | 0   | 0   | 0%   | 0%   | 0%   | 0%   | A | A | A | A |   |
| b4496 | yedS | 2032075 | 2033267 | + | 1192 | 48  | 0   | 2   | 41  | 42  | 0%   | 4%   | 85%  | 88%  | A | P | P | P | U |
| b1967 | hchA | 2033859 | 2034710 | + | 851  | 34  | 33  | 34  | 34  | 34  | 97%  | 100% | 100% | 100% | P | P | P | P |   |
| b1970 | yedX | 2036980 | 2037393 | + | 413  | 16  | 9   | 9   | 9   | 10  | 56%  | 56%  | 56%  | 63%  | P | P | P | P | U |
| b1971 | yedY | 2037502 | 2038506 | + | 1004 | 41  | 28  | 29  | 38  | 38  | 68%  | 71%  | 93%  | 93%  | P | P | P | P | U |
| b1972 | yedZ | 2038507 | 2039142 | + | 635  | 25  | 10  | 10  | 18  | 18  | 40%  | 40%  | 72%  | 72%  | P | P | P | P | U |
| b1973 | yodA | 2039399 | 2040049 | + | 650  | 26  | 26  | 26  | 26  | 26  | 100% | 100% | 100% | 100% | P | P | P | P | U |
| b1974 | yodB | 2040392 | 2040922 | + | 530  | 21  | 0   | 0   | 3   | 18  | 0%   | 0%   | 14%  | 86%  | A | A | P | P | U |
| b1976 | mtfA | 2041675 | 2042472 | + | 797  | 32  | 32  | 32  | 32  | 32  | 100% | 100% | 100% | 100% | P | P | P | P | U |
| b1977 | asnT | 2042573 | 2042648 | + | 75   | 3   | 3   | 3   | 3   | 3   | 100% | 100% | 100% | 100% | P | P | P | P |   |
| b1978 | yeeJ | 2042962 | 2050038 | + | 7076 | 283 | 30  | 46  | 55  | 56  | 11%  | 16%  | 19%  | 20%  | P | P | P | P |   |
| b1981 | shiA | 2051667 | 2052983 | + | 1316 | 52  | 51  | 51  | 51  | 51  | 98%  | 98%  | 98%  | 98%  | P | P | P | P |   |
| b1982 | amn  | 2053085 | 2054539 | + | 1454 | 59  | 58  | 58  | 58  | 58  | 98%  | 98%  | 98%  | 98%  | P | P | P | P |   |
| b1983 | yeeN | 2054882 | 2055598 | + | 716  | 29  | 24  | 24  | 24  | 24  | 83%  | 83%  | 83%  | 83%  | P | P | P | P | U |
| b1986 | asnU | 2057875 | 2057950 | + | 75   | 3   | 3   | 3   | 3   | 3   | 100% | 100% | 100% | 100% | P | P | P | P |   |
| b1989 | asnV | 2060284 | 2060359 | + | 75   | 4   | 4   | 4   | 4   | 4   | 100% | 100% | 100% | 100% | P | P | P | P |   |
| b4582 | yoeA | 2066659 | 2066962 | + | 303  | 13  | 2   | 2   | 2   | 13  | 15%  | 15%  | 15%  | 100% | P | P | P | P | U |
| b4582 | yoeA | 2068294 | 2068498 | + | 204  | 8   | 3   | 3   | 8   | 8   | 38%  | 38%  | 100% | 100% | P | P | P | P | U |
| b1999 | yeeP | 2068684 | 2069235 | + | 551  | 23  | 3   | 3   | 6   | 6   | 13%  | 13%  | 26%  | 26%  | P | P | P | P | U |
| b4435 | isrC | 2069339 | 2069542 | + | 203  | 8   | 2   | 2   | 3   | 3   | 25%  | 25%  | 38%  | 38%  | P | P | P | P | U |
| b2000 | flu  | 2069563 | 2072682 | + | 3119 | 124 | 118 | 118 | 118 | 118 | 95%  | 95%  | 95%  | 95%  | P | P | P | P |   |
| b2001 | yeeR | 2072803 | 2074335 | + | 1532 | 61  | 3   | 3   | 3   | 3   | 5%   | 5%   | 5%   | 5%   | P | P | P | P | U |
| b2002 | yeeS | 2074332 | 2074778 | + | 446  | 18  | 0   | 0   | 0   | 0   | 0%   | 0%   | 0%   | 0%   | A | A | A | A | U |
| b2003 | yeeT | 2074841 | 2075062 | + | 221  | 9   | 0   | 0   | 0   | 0   | 0%   | 0%   | 0%   | 0%   | A | A | A | A | U |
| b2004 | yeeU | 2075136 | 2075504 | + | 368  | 15  | 0   | 0   | 0   | 0   | 0%   | 0%   | 0%   | 0%   | A | A | A | A |   |
| b2005 | yeeV | 2075593 | 2075967 | + | 374  | 15  | 0   | 0   | 0   | 0   | 0%   | 0%   | 0%   | 0%   | A | A | A | A |   |
| b2006 | yeeW | 2075964 | 2076131 | + | 167  | 6   | 2   | 2   | 2   | 2   | 33%  | 33%  | 33%  | 33%  | P | P | P | P | U |
| b4538 | yoeF | 2076770 | 2076955 | + | 185  | 7   | 0   | 0   | 0   | 0   | 0%   | 0%   | 0%   | 0%   | A | A | A | A | U |
| b2011 | sbcB | 2080780 | 2082207 | + | 1427 | 57  | 56  | 56  | 56  | 56  | 98%  | 98%  | 98%  | 98%  | P | P | P | P |   |
| b2018 | hisL | 2088020 | 2088070 | + | 50   | 2   | 2   | 2   | 2   | 2   | 100% | 100% | 100% | 100% | P | P | P | P |   |
| b2019 | hisG | 2088216 | 2089115 | + | 899  | 36  | 36  | 36  | 36  | 36  | 100% | 100% | 100% | 100% | P | P | P | P |   |
| b2020 | hisD | 2089121 | 2090425 | + | 1304 | 52  | 52  | 52  | 52  | 52  | 100% | 100% | 100% | 100% | P | P | P | P |   |
| b2021 | hisC | 2090422 | 2091492 | + | 1070 | 43  | 43  | 43  | 43  | 43  | 100% | 100% | 100% | 100% | P | P | P | P |   |
| b2022 | hisB | 2091492 | 2092559 | + | 1067 | 42  | 42  | 42  | 42  | 42  | 100% | 100% | 100% | 100% | P | P | P | P |   |
| b2023 | hisH | 2092559 | 2093149 | + | 590  | 24  | 24  | 24  | 24  | 24  | 100% | 100% | 100% | 100% | P | P | P | P |   |
| b2024 | hisA | 2093149 | 2093886 | + | 737  | 30  | 30  | 30  | 30  | 30  | 100% | 100% | 100% | 100% | P | P | P | P |   |
| b2025 | hisF | 2093868 | 2094644 | + | 776  | 31  | 31  | 31  | 31  | 31  | 100% | 100% | 100% | 100% | P | P | P | P |   |
| b2026 | hisI | 2094638 | 2095249 | + | 611  | 24  | 24  | 24  | 24  | 24  | 100% | 100% | 100% | 100% | P | P | P | P |   |
| b2063 | yegH | 2135926 | 2137509 | + | 1583 | 63  | 57  | 57  | 60  | 60  | 90%  | 90%  | 95%  | 95%  | P | P | P | P | U |
| b2067 | yegE | 2141290 | 2144607 | + | 3317 | 133 | 62  | 62  | 66  | 84  | 47%  | 47%  | 50%  | 63%  | P | P | P | P | U |
| b2069 | yegD | 2145698 | 2147050 | + | 1352 | 54  | 23  | 23  | 25  | 25  | 43%  | 43%  | 46%  | 46%  | P | P | P | P | U |
| b2071 | yegJ | 2149209 | 2149670 | + | 461  | 19  | 0   | 0   | 0   | 0   | 0%   | 0%   | 0%   | 0%   | A | A | A | A | U |



|       |      |         |         |   |      |     |    |    |    |    |      |      |      |      |   |   |   |   |   |
|-------|------|---------|---------|---|------|-----|----|----|----|----|------|------|------|------|---|---|---|---|---|
| b4436 | ryeC | 2151333 | 2151475 | + | 142  | 6   | 1  | 1  | 2  | 2  | 17%  | 17%  | 33%  | 33%  | P | P | P | P | U |
| b4437 | ryeD | 2151668 | 2151803 | + | 135  | 5   | 4  | 4  | 4  | 4  | 80%  | 80%  | 80%  | 80%  | P | P | P | P | U |
| b2074 | mdtA | 2152040 | 2153287 | + | 1247 | 50  | 33 | 33 | 33 | 34 | 66%  | 66%  | 66%  | 68%  | P | P | P | P |   |
| b2075 | mdtB | 2153287 | 2156409 | + | 3122 | 125 | 9  | 9  | 10 | 13 | 7%   | 7%   | 8%   | 10%  | P | P | P | P |   |
| b2076 | mdtC | 2156410 | 2159487 | + | 3077 | 123 | 8  | 8  | 9  | 10 | 7%   | 7%   | 7%   | 8%   | P | P | P | P |   |
| b2077 | mdtD | 2159488 | 2160903 | + | 1415 | 57  | 3  | 4  | 10 | 11 | 5%   | 7%   | 18%  | 19%  | P | P | P | P |   |
| b2078 | baeS | 2160900 | 2162303 | + | 1403 | 56  | 4  | 4  | 4  | 5  | 7%   | 7%   | 7%   | 9%   | P | P | P | P |   |
| b2079 | baeR | 2162300 | 2163022 | + | 722  | 29  | 28 | 28 | 28 | 28 | 97%  | 97%  | 97%  | 97%  | P | P | P | P |   |
| b2080 | yegP | 2163213 | 2163545 | + | 332  | 14  | 14 | 14 | 14 | 14 | 100% | 100% | 100% | 100% | P | P | P | P | U |
| b2081 | yegQ | 2163692 | 2165053 | + | 1361 | 54  | 53 | 53 | 53 | 53 | 98%  | 98%  | 98%  | 98%  | P | P | P | P | U |
| b4438 | ryeE | 2165136 | 2165221 | + | 85   | 4   | 2  | 2  | 2  | 2  | 50%  | 50%  | 50%  | 50%  | P | P | P | P | U |
| b2086 | yegS | 2166736 | 2167635 | + | 899  | 36  | 31 | 31 | 33 | 34 | 86%  | 86%  | 92%  | 94%  | P | P | P | P |   |
| b2088 | insE | 2168251 | 2168559 | + | 308  | 12  | 12 | 12 | 12 | 12 | 100% | 100% | 100% | 100% | P | P | P | P |   |
| b2089 | insF | 2168556 | 2169422 | + | 866  | 35  | 32 | 32 | 32 | 32 | 91%  | 91%  | 91%  | 91%  | P | P | P | P |   |
| b2098 | yegT | 2176843 | 2178120 | + | 1277 | 51  | 3  | 3  | 3  | 3  | 6%   | 6%   | 6%   | 6%   | P | P | P | P | U |
| b2099 | yegU | 2178117 | 2179121 | + | 1004 | 40  | 7  | 7  | 7  | 7  | 18%  | 18%  | 18%  | 18%  | P | P | P | P | U |
| b2100 | yegV | 2179118 | 2180083 | + | 965  | 38  | 2  | 2  | 2  | 2  | 5%   | 5%   | 5%   | 5%   | P | P | P | P | U |
| b2106 | rcnA | 2183939 | 2184763 | + | 824  | 33  | 7  | 7  | 7  | 9  | 21%  | 21%  | 21%  | 27%  | P | P | P | P |   |
| b2107 | yohN | 2184982 | 2185320 | + | 338  | 14  | 12 | 12 | 12 | 12 | 86%  | 86%  | 86%  | 86%  | P | P | P | P | U |
| b2114 | metG | 2192322 | 2194355 | + | 2033 | 81  | 81 | 81 | 81 | 81 | 100% | 100% | 100% | 100% | P | P | P | P |   |
| b4499 | yehH | 2194496 | 2198291 | + | 3795 | 152 | 0  | 1  | 1  | 1  | 0%   | 1%   | 1%   | 1%   | A | P | P | P | U |
| b2118 | yehI | 2198301 | 2201933 | + | 3632 | 145 | 0  | 0  | 0  | 0  | 0%   | 0%   | 0%   | 0%   | A | A | A | A | U |
| b4541 | yehK | 2201994 | 2202311 | + | 317  | 12  | 0  | 0  | 0  | 0  | 0%   | 0%   | 0%   | 0%   | A | A | A | A | U |
| b2119 | yehL | 2202618 | 2203706 | + | 1088 | 43  | 0  | 0  | 0  | 0  | 0%   | 0%   | 0%   | 0%   | A | A | A | A | U |
| b2120 | yehM | 2203717 | 2205996 | + | 2279 | 91  | 0  | 0  | 0  | 0  | 0%   | 0%   | 0%   | 0%   | A | A | A | A | U |
| b2121 | yehP | 2205989 | 2207125 | + | 1136 | 46  | 0  | 0  | 0  | 0  | 0%   | 0%   | 0%   | 0%   | A | A | A | A | U |
| b2122 | yehQ | 2207122 | 2209122 | + | 2000 | 80  | 0  | 0  | 0  | 0  | 0%   | 0%   | 0%   | 0%   | A | A | A | A | U |
| b2123 | yehR | 2209247 | 2209708 | + | 461  | 18  | 0  | 0  | 0  | 0  | 0%   | 0%   | 0%   | 0%   | A | A | A | A | U |
| b2127 | mlrA | 2212888 | 2213619 | + | 731  | 30  | 23 | 23 | 24 | 26 | 77%  | 77%  | 80%  | 87%  | P | P | P | P |   |
| b4542 | yohO | 2213679 | 2213786 | + | 107  | 4   | 4  | 4  | 4  | 4  | 100% | 100% | 100% | 100% | P | P | P | P | U |
| b2133 | dld  | 2220207 | 2221922 | + | 1715 | 69  | 69 | 69 | 69 | 69 | 100% | 100% | 100% | 100% | P | P | P | P |   |
| b2136 | yohD | 2223823 | 2224401 | + | 578  | 23  | 23 | 23 | 23 | 23 | 100% | 100% | 100% | 100% | P | P | P | P | U |
| b2141 | yohJ | 2228646 | 2229044 | + | 398  | 16  | 5  | 11 | 12 | 12 | 31%  | 69%  | 75%  | 75%  | P | P | P | P | U |
| b2142 | yohK | 2229041 | 2229736 | + | 695  | 28  | 7  | 15 | 24 | 24 | 25%  | 54%  | 86%  | 86%  | P | P | P | P | U |
| b2143 | cdd  | 2229866 | 2230750 | + | 884  | 36  | 25 | 28 | 30 | 31 | 69%  | 78%  | 83%  | 86%  | P | P | P | P |   |
| b2144 | sanA | 2230900 | 2231619 | + | 719  | 29  | 21 | 22 | 22 | 22 | 72%  | 76%  | 76%  | 76%  | P | P | P | P | U |
| b2145 | yeiS | 2231622 | 2231861 | + | 239  | 9   | 6  | 6  | 6  | 6  | 67%  | 67%  | 67%  | 67%  | P | P | P | P | U |
| b2146 | yeiT | 2232055 | 2233293 | + | 1238 | 50  | 2  | 19 | 19 | 19 | 4%   | 38%  | 38%  | 38%  | P | P | P | P | U |
| b2147 | yeiA | 2233287 | 2234522 | + | 1235 | 50  | 7  | 21 | 21 | 21 | 14%  | 42%  | 42%  | 42%  | P | P | P | P | U |
| b2154 | yeiG | 2241932 | 2242768 | + | 836  | 33  | 30 | 30 | 30 | 30 | 91%  | 91%  | 91%  | 91%  | P | P | P | P | U |
| b2158 | yeiH | 2247739 | 2248788 | + | 1049 | 42  | 15 | 15 | 15 | 15 | 36%  | 36%  | 36%  | 36%  | P | P | P | P | U |
| b2159 | nfo  | 2248862 | 2249719 | + | 857  | 34  | 33 | 33 | 33 | 33 | 97%  | 97%  | 97%  | 97%  | P | P | P | P |   |
| b2160 | yeiI | 2249722 | 2250810 | + | 1088 | 43  | 31 | 31 | 31 | 31 | 72%  | 72%  | 72%  | 72%  | P | P | P | P | U |
| b2163 | yeiL | 2253377 | 2254036 | + | 659  | 26  | 0  | 0  | 0  | 0  | 0%   | 0%   | 0%   | 0%   | A | A | A | A |   |
| b2170 | setB | 2261885 | 2263066 | + | 1181 | 47  | 4  | 4  | 4  | 4  | 9%   | 9%   | 9%   | 9%   | P | P | P | P |   |
| b2171 | yeiP | 2263472 | 2264044 | + | 572  | 22  | 22 | 22 | 22 | 22 | 100% | 100% | 100% | 100% | P | P | P | P | U |

|       |      |         |         |   |      |     |     |     |     |     |      |      |      |      |   |   |   |   |   |
|-------|------|---------|---------|---|------|-----|-----|-----|-----|-----|------|------|------|------|---|---|---|---|---|
| b2172 | yeiQ | 2264267 | 2265733 | + | 1466 | 59  | 18  | 18  | 30  | 30  | 31%  | 31%  | 51%  | 51%  | P | P | P | P | U |
| b2173 | yeiR | 2265851 | 2266837 | + | 986  | 39  | 34  | 34  | 34  | 34  | 87%  | 87%  | 87%  | 87%  | P | P | P | P | U |
| b2174 | lpxT | 2266876 | 2267589 | + | 713  | 28  | 22  | 22  | 22  | 22  | 79%  | 79%  | 79%  | 79%  | P | P | P | P | U |
| b2175 | spr  | 2268001 | 2268567 | + | 566  | 22  | 22  | 22  | 22  | 22  | 100% | 100% | 100% | 100% | P | P | P | P | U |
| b2176 | rtn  | 2268748 | 2270304 | + | 1556 | 62  | 33  | 33  | 33  | 33  | 53%  | 53%  | 53%  | 53%  | P | P | P | P | U |
| b2177 | yejA | 2270386 | 2272200 | + | 1814 | 73  | 45  | 45  | 46  | 50  | 62%  | 62%  | 63%  | 68%  | P | P | P | P | U |
| b2178 | yejB | 2272201 | 2273295 | + | 1094 | 43  | 4   | 4   | 4   | 6   | 9%   | 9%   | 9%   | 14%  | P | P | P | P | U |
| b2179 | yejE | 2273295 | 2274320 | + | 1025 | 41  | 9   | 9   | 9   | 12  | 22%  | 22%  | 22%  | 29%  | P | P | P | P | U |
| b2180 | yejF | 2274322 | 2275911 | + | 1589 | 63  | 41  | 41  | 41  | 42  | 65%  | 65%  | 65%  | 67%  | P | P | P | P | U |
| b2184 | yejH | 2278654 | 2280414 | + | 1760 | 70  | 41  | 41  | 41  | 41  | 59%  | 59%  | 59%  | 59%  | P | P | P | P | U |
| b2185 | rply | 2280539 | 2280823 | + | 284  | 12  | 12  | 12  | 12  | 12  | 100% | 100% | 100% | 100% | P | P | P | P | U |
| b2187 | yejL | 2282151 | 2282378 | + | 227  | 9   | 9   | 9   | 9   | 9   | 100% | 100% | 100% | 100% | P | P | P | P | U |
| b2188 | yejM | 2282398 | 2284158 | + | 1760 | 70  | 64  | 64  | 64  | 64  | 91%  | 91%  | 91%  | 91%  | P | P | P | P | U |
| b2189 | proL | 2284233 | 2284309 | + | 76   | 3   | 3   | 3   | 3   | 3   | 100% | 100% | 100% | 100% | P | P | P | P | U |
| b2193 | narP | 2288522 | 2289169 | + | 647  | 26  | 25  | 26  | 26  | 26  | 96%  | 100% | 100% | 100% | P | P | P | P | U |
| b4604 | yojO | 2301628 | 2301792 | + | 164  | 7   | 0   | 0   | 2   | 2   | 0%   | 0%   | 29%  | 29%  | A | A | P | P | U |
| b2209 | eco  | 2301927 | 2302415 | + | 488  | 20  | 15  | 17  | 18  | 18  | 75%  | 85%  | 90%  | 90%  | P | P | P | P | U |
| b4439 | micF | 2311106 | 2311198 | + | 92   | 3   | 2   | 2   | 3   | 3   | 67%  | 67%  | 100% | 100% | P | P | P | P | U |
| b2216 | rdsD | 2311510 | 2314182 | + | 2672 | 107 | 106 | 106 | 106 | 106 | 99%  | 99%  | 99%  | 99%  | P | P | P | P | U |
| b2217 | rdsB | 2314199 | 2314849 | + | 650  | 26  | 26  | 26  | 26  | 26  | 100% | 100% | 100% | 100% | P | P | P | P | U |
| b2219 | atoS | 2318065 | 2319891 | + | 1826 | 73  | 0   | 0   | 29  | 29  | 0%   | 0%   | 40%  | 40%  | A | A | P | P | U |
| b2220 | atoC | 2319888 | 2321273 | + | 1385 | 55  | 0   | 0   | 2   | 2   | 0%   | 0%   | 4%   | 4%   | A | A | P | P | U |
| b2221 | atoD | 2321469 | 2322131 | + | 662  | 27  | 0   | 0   | 1   | 1   | 0%   | 0%   | 4%   | 4%   | A | A | P | P | U |
| b2222 | atoA | 2322131 | 2322781 | + | 650  | 26  | 0   | 0   | 3   | 3   | 0%   | 0%   | 12%  | 12%  | A | A | P | P | U |
| b2223 | atoE | 2322778 | 2324100 | + | 1322 | 53  | 0   | 0   | 0   | 0   | 0%   | 0%   | 0%   | 0%   | A | A | A | A | U |
| b2224 | atoB | 2324131 | 2325315 | + | 1184 | 47  | 0   | 0   | 0   | 0   | 0%   | 0%   | 0%   | 0%   | A | A | A | A | U |
| b2232 | ubiG | 2337589 | 2338311 | + | 722  | 29  | 29  | 29  | 29  | 29  | 100% | 100% | 100% | 100% | P | P | P | P | U |
| b2234 | nrdA | 2342887 | 2345172 | + | 2285 | 91  | 91  | 91  | 91  | 91  | 100% | 100% | 100% | 100% | P | P | P | P | U |
| b2235 | nrdB | 2345406 | 2346536 | + | 1130 | 45  | 45  | 45  | 45  | 45  | 100% | 100% | 100% | 100% | P | P | P | P | U |
| b2236 | yfaE | 2346536 | 2346790 | + | 254  | 10  | 7   | 7   | 7   | 7   | 70%  | 70%  | 70%  | 70%  | P | P | P | P | U |
| b2238 | yfaH | 2347673 | 2347915 | + | 242  | 10  | 0   | 0   | 0   | 0   | 0%   | 0%   | 0%   | 0%   | A | A | A | A | U |
| b2241 | glpA | 2350669 | 2352297 | + | 1628 | 65  | 0   | 0   | 6   | 6   | 0%   | 0%   | 9%   | 9%   | A | A | P | P | U |
| b2242 | glpB | 2352287 | 2353546 | + | 1259 | 50  | 0   | 0   | 4   | 4   | 0%   | 0%   | 8%   | 8%   | A | A | P | P | U |
| b2243 | glpC | 2353543 | 2354733 | + | 1190 | 48  | 0   | 0   | 1   | 1   | 0%   | 0%   | 2%   | 2%   | A | A | P | P | U |
| b2244 | yfaD | 2354926 | 2355825 | + | 899  | 36  | 9   | 9   | 9   | 9   | 25%  | 25%  | 25%  | 25%  | P | P | P | P | U |
| b4543 | ypaA | 2355838 | 2356023 | + | 185  | 7   | 7   | 7   | 7   | 7   | 100% | 100% | 100% | 100% | P | P | P | P | U |
| b2251 | nudI | 2362576 | 2363001 | + | 425  | 17  | 5   | 5   | 5   | 7   | 29%  | 29%  | 29%  | 41%  | P | P | P | P | U |
| b2253 | arnB | 2363950 | 2365089 | + | 1139 | 46  | 24  | 24  | 24  | 39  | 52%  | 52%  | 52%  | 85%  | P | P | P | P | U |
| b2254 | arnC | 2365093 | 2366061 | + | 968  | 39  | 7   | 7   | 7   | 34  | 18%  | 18%  | 18%  | 87%  | P | P | P | P | U |
| b2255 | arnA | 2366061 | 2368043 | + | 1982 | 79  | 14  | 14  | 14  | 30  | 18%  | 18%  | 18%  | 38%  | P | P | P | P | U |
| b2256 | arnD | 2368040 | 2368930 | + | 890  | 36  | 1   | 1   | 1   | 2   | 3%   | 3%   | 3%   | 6%   | P | P | P | P | U |
| b2257 | arnT | 2368930 | 2370582 | + | 1652 | 66  | 5   | 6   | 16  | 17  | 8%   | 9%   | 24%  | 26%  | P | P | P | P | U |
| b4544 | arnE | 2370579 | 2370914 | + | 335  | 14  | 1   | 1   | 13  | 13  | 7%   | 7%   | 93%  | 93%  | P | P | P | P | U |
| b2258 | arnF | 2370914 | 2371300 | + | 386  | 15  | 1   | 1   | 6   | 6   | 7%   | 7%   | 40%  | 40%  | P | P | P | P | U |
| b2268 | rbn  | 2379630 | 2380547 | + | 917  | 36  | 24  | 24  | 24  | 25  | 67%  | 67%  | 67%  | 69%  | P | P | P | P | U |
| b2269 | elaD | 2380735 | 2381946 | + | 1211 | 48  | 0   | 0   | 0   | 0   | 0%   | 0%   | 0%   | 0%   | A | A | A | A | U |

|       |      |         |         |   |      |     |    |    |    |    |      |      |      |      |   |   |   |   |   |
|-------|------|---------|---------|---|------|-----|----|----|----|----|------|------|------|------|---|---|---|---|---|
| b2271 | yfbL | 2383882 | 2384853 | + | 971  | 38  | 0  | 0  | 0  | 0  | 0%   | 0%   | 0%   | 0%   | A | A | A | A | U |
| b2272 | yfbM | 2384956 | 2385459 | + | 503  | 20  | 0  | 0  | 0  | 0  | 0%   | 0%   | 0%   | 0%   | A | A | A | A | U |
| b2274 | yfbO | 2386603 | 2387079 | + | 476  | 19  | 0  | 1  | 3  | 3  | 0%   | 5%   | 16%  | 16%  | A | P | P | P | U |
| b2275 | yfbP | 2387135 | 2387986 | + | 851  | 34  | 0  | 5  | 7  | 7  | 0%   | 15%  | 21%  | 21%  | A | P | P | P | U |
| b2290 | yfbQ | 2405583 | 2406800 | + | 1217 | 49  | 42 | 42 | 42 | 42 | 86%  | 86%  | 86%  | 86%  | P | P | P | P | U |
| b2291 | yfbR | 2406884 | 2407483 | + | 599  | 24  | 16 | 16 | 16 | 17 | 67%  | 67%  | 67%  | 71%  | P | P | P | P | U |
| b2296 | ackA | 2411492 | 2412694 | + | 1202 | 48  | 48 | 48 | 48 | 48 | 100% | 100% | 100% | 100% | P | P | P | P | U |
| b2297 | pta  | 2412769 | 2414913 | + | 2144 | 86  | 85 | 85 | 85 | 85 | 99%  | 99%  | 99%  | 99%  | P | P | P | P | U |
| b2298 | yfcC | 2415103 | 2416623 | + | 1520 | 61  | 0  | 10 | 10 | 11 | 0%   | 16%  | 16%  | 18%  | A | P | P | P | U |
| b2302 | yfcG | 2418643 | 2419290 | + | 647  | 26  | 17 | 20 | 25 | 25 | 65%  | 77%  | 96%  | 96%  | P | P | P | P | U |
| b2303 | folX | 2419347 | 2419709 | + | 362  | 15  | 15 | 15 | 15 | 15 | 100% | 100% | 100% | 100% | P | P | P | P | U |
| b2304 | yfcH | 2419730 | 2420623 | + | 893  | 36  | 36 | 36 | 36 | 36 | 100% | 100% | 100% | 100% | P | P | P | P | U |
| b2321 | flk  | 2435972 | 2436967 | + | 995  | 40  | 35 | 35 | 35 | 35 | 88%  | 88%  | 88%  | 88%  | P | P | P | P | U |
| b2324 | mnmC | 2439786 | 2441792 | + | 2006 | 80  | 56 | 56 | 57 | 57 | 70%  | 70%  | 71%  | 71%  | P | P | P | P | U |
| b2331 | yfcN | 2446628 | 2447179 | + | 551  | 22  | 22 | 22 | 22 | 22 | 100% | 100% | 100% | 100% | P | P | P | P | U |
| b2344 | fadL | 2459328 | 2460668 | + | 1340 | 53  | 47 | 47 | 49 | 49 | 89%  | 89%  | 92%  | 92%  | P | P | P | P | U |
| b2345 | yfdF | 2461034 | 2462092 | + | 1058 | 42  | 0  | 0  | 0  | 0  | 0%   | 0%   | 0%   | 0%   | A | A | A | A | U |
| b2347 | yfdC | 2463323 | 2464255 | + | 932  | 38  | 15 | 17 | 28 | 36 | 39%  | 45%  | 74%  | 95%  | P | P | P | P | U |
| b2348 | argW | 2464331 | 2464405 | + | 74   | 3   | 3  | 3  | 3  | 3  | 100% | 100% | 100% | 100% | P | P | P | P | U |
| b2349 | intS | 2464567 | 2465724 | + | 1157 | 46  | 37 | 37 | 37 | 37 | 80%  | 80%  | 80%  | 80%  | P | P | P | P | U |
| b2350 | yfdG | 2465877 | 2466239 | + | 362  | 15  | 15 | 15 | 15 | 15 | 100% | 100% | 100% | 100% | P | P | P | P | U |
| b2351 | yfdH | 2466236 | 2467156 | + | 920  | 37  | 37 | 37 | 37 | 37 | 100% | 100% | 100% | 100% | P | P | P | P | U |
| b2352 | yfdI | 2467153 | 2468484 | + | 1331 | 54  | 39 | 39 | 39 | 40 | 72%  | 72%  | 72%  | 74%  | P | P | P | P | U |
| b2353 | tfaS | 2468837 | 2469127 | + | 290  | 11  | 4  | 5  | 11 | 11 | 36%  | 45%  | 100% | 100% | P | P | P | P | U |
| b2359 | yfdP | 2471626 | 2471988 | + | 362  | 15  | 0  | 0  | 0  | 0  | 0%   | 0%   | 0%   | 0%   | A | A | A | A | U |
| b2360 | yfdQ | 2472054 | 2472878 | + | 824  | 33  | 0  | 0  | 0  | 0  | 0%   | 0%   | 0%   | 0%   | A | A | A | A | U |
| b2361 | yfdR | 2473006 | 2473542 | + | 536  | 21  | 0  | 0  | 0  | 0  | 0%   | 0%   | 0%   | 0%   | A | A | A | A | U |
| b2362 | yfdS | 2473533 | 2473895 | + | 362  | 14  | 0  | 2  | 2  | 2  | 0%   | 14%  | 14%  | 14%  | A | P | P | P | U |
| b2363 | yfdT | 2473895 | 2474200 | + | 305  | 12  | 0  | 5  | 5  | 5  | 0%   | 42%  | 42%  | 42%  | A | P | P | P | U |
| b4545 | ypdJ | 2474203 | 2474253 | + | 50   | 3   | 0  | 0  | 0  | 0  | 0%   | 0%   | 0%   | 0%   | A | A | A | A | U |
| b4501 | torI | 2474332 | 2474532 | + | 200  | 8   | 5  | 7  | 7  | 7  | 63%  | 88%  | 88%  | 88%  | P | P | P | P | U |
| b4643 | pawZ | 2474606 | 2474620 | + | 14   | 0   | 0  | 0  | 0  | 0  | 0%   | 0%   | 0%   | 0%   | A | A | A | A | U |
| b2365 | dsdX | 2475869 | 2477206 | + | 1337 | 54  | 2  | 3  | 5  | 5  | 4%   | 6%   | 9%   | 9%   | P | P | P | P | U |
| b2366 | dsdA | 2477224 | 2478552 | + | 1328 | 53  | 20 | 21 | 21 | 24 | 38%  | 40%  | 40%  | 45%  | P | P | P | P | U |
| b2369 | evgA | 2481777 | 2482391 | + | 614  | 25  | 24 | 24 | 25 | 25 | 96%  | 96%  | 100% | 100% | P | P | P | P | U |
| b2370 | evgS | 2482396 | 2485989 | + | 3593 | 144 | 54 | 54 | 54 | 56 | 38%  | 38%  | 38%  | 39%  | P | P | P | P | U |
| b2376 | ypdI | 2492720 | 2492995 | + | 275  | 11  | 0  | 0  | 0  | 0  | 0%   | 0%   | 0%   | 0%   | A | A | A | A | U |
| b2378 | lpxP | 2493667 | 2494587 | + | 920  | 37  | 1  | 4  | 4  | 5  | 3%   | 11%  | 11%  | 14%  | P | P | P | P | U |
| b2380 | ypdA | 2496693 | 2498390 | + | 1697 | 68  | 19 | 20 | 21 | 21 | 28%  | 29%  | 31%  | 31%  | P | P | P | P | U |
| b2381 | ypdB | 2498405 | 2499139 | + | 734  | 29  | 27 | 27 | 29 | 29 | 93%  | 93%  | 100% | 100% | P | P | P | P | U |
| b2382 | ypdC | 2499152 | 2500009 | + | 857  | 35  | 5  | 6  | 9  | 10 | 14%  | 17%  | 26%  | 29%  | P | P | P | P | U |
| b2389 | yfeO | 2507652 | 2508908 | + | 1256 | 51  | 2  | 2  | 5  | 9  | 4%   | 4%   | 10%  | 18%  | P | P | P | P | U |
| b2390 | ypeC | 2509023 | 2509349 | + | 326  | 13  | 5  | 7  | 7  | 9  | 38%  | 54%  | 54%  | 69%  | P | P | P | P | U |
| b2393 | nupC | 2511064 | 2512266 | + | 1202 | 48  | 47 | 47 | 47 | 47 | 98%  | 98%  | 98%  | 98%  | P | P | P | P | U |
| b2394 | insL | 2512353 | 2513465 | + | 1112 | 45  | 45 | 45 | 45 | 45 | 100% | 100% | 100% | 100% | P | P | P | P | U |
| b2398 | yfeC | 2516489 | 2516833 | + | 344  | 14  | 14 | 14 | 14 | 14 | 100% | 100% | 100% | 100% | P | P | P | P | U |

|       |      |         |         |   |      |     |    |    |    |    |      |      |      |      |   |   |   |   |   |
|-------|------|---------|---------|---|------|-----|----|----|----|----|------|------|------|------|---|---|---|---|---|
| b2399 | yfeD | 2516856 | 2517227 | + | 371  | 14  | 12 | 13 | 14 | 14 | 86%  | 93%  | 100% | 100% | P | P | P | P | U |
| b2401 | valU | 2518953 | 2519028 | + | 75   | 3   | 3  | 3  | 3  | 3  | 100% | 100% | 100% | 100% | P | P | P | P |   |
| b2402 | valX | 2519073 | 2519148 | + | 75   | 3   | 3  | 3  | 3  | 3  | 100% | 100% | 100% | 100% | P | P | P | P |   |
| b2403 | valY | 2519195 | 2519270 | + | 75   | 3   | 3  | 3  | 3  | 3  | 100% | 100% | 100% | 100% | P | P | P | P |   |
| b2404 | lysV | 2519275 | 2519350 | + | 75   | 3   | 3  | 3  | 3  | 3  | 100% | 100% | 100% | 100% | P | P | P | P |   |
| b2408 | yfeN | 2523149 | 2523913 | + | 764  | 31  | 5  | 7  | 13 | 14 | 16%  | 23%  | 42%  | 45%  | P | P | P | P | U |
| b2410 | yfeH | 2524968 | 2525966 | + | 998  | 40  | 35 | 35 | 36 | 36 | 88%  | 88%  | 90%  | 90%  | P | P | P | P | U |
| b2413 | cysZ | 2529485 | 2530246 | + | 761  | 30  | 26 | 26 | 26 | 26 | 87%  | 87%  | 87%  | 87%  | P | P | P | P | U |
| b2414 | cysK | 2530431 | 2531402 | + | 971  | 39  | 39 | 39 | 39 | 39 | 100% | 100% | 100% | 100% | P | P | P | P |   |
| b2415 | ptsH | 2531786 | 2532043 | + | 257  | 10  | 10 | 10 | 10 | 10 | 100% | 100% | 100% | 100% | P | P | P | P |   |
| b2416 | ptsI | 2532088 | 2533815 | + | 1727 | 69  | 69 | 69 | 69 | 69 | 100% | 100% | 100% | 100% | P | P | P | P |   |
| b2417 | crr  | 2533856 | 2534365 | + | 509  | 21  | 21 | 21 | 21 | 21 | 100% | 100% | 100% | 100% | P | P | P | P |   |
| b2419 | yfeK | 2535364 | 2535738 | + | 374  | 15  | 9  | 9  | 9  | 13 | 60%  | 60%  | 60%  | 87%  | P | P | P | P | U |
| b2420 | yfeS | 2535771 | 2536505 | + | 734  | 29  | 5  | 5  | 6  | 14 | 17%  | 17%  | 21%  | 48%  | P | P | P | P | U |
| b2428 | murQ | 2543795 | 2544691 | + | 896  | 36  | 16 | 16 | 16 | 17 | 44%  | 44%  | 44%  | 47%  | P | P | P | P | U |
| b2429 | murP | 2544695 | 2546119 | + | 1424 | 57  | 4  | 4  | 4  | 4  | 7%   | 7%   | 7%   | 7%   | P | P | P | P | U |
| b2430 | yfeW | 2546124 | 2547428 | + | 1304 | 52  | 3  | 7  | 7  | 7  | 6%   | 13%  | 13%  | 13%  | P | P | P | P | U |
| b2435 | amiA | 2550374 | 2551243 | + | 869  | 35  | 35 | 35 | 35 | 35 | 100% | 100% | 100% | 100% | P | P | P | P |   |
| b2436 | hemF | 2551247 | 2552146 | + | 899  | 36  | 32 | 32 | 32 | 32 | 89%  | 89%  | 89%  | 89%  | P | P | P | P |   |
| b2442 | intZ | 2556880 | 2558088 | + | 1208 | 49  | 43 | 43 | 43 | 43 | 88%  | 88%  | 88%  | 88%  | P | P | P | P | U |
| b2443 | yffL | 2558279 | 2558920 | + | 641  | 26  | 15 | 16 | 17 | 17 | 58%  | 62%  | 65%  | 65%  | P | P | P | P | U |
| b2444 | yffM | 2559390 | 2559635 | + | 245  | 9   | 0  | 0  | 0  | 0  | 0%   | 0%   | 0%   | 0%   | A | A | A | A | U |
| b2445 | yffN | 2559647 | 2560015 | + | 368  | 15  | 0  | 0  | 0  | 0  | 0%   | 0%   | 0%   | 0%   | A | A | A | A | U |
| b2446 | yffO | 2560133 | 2560549 | + | 416  | 17  | 3  | 13 | 13 | 13 | 18%  | 76%  | 76%  | 76%  | P | P | P | P | U |
| b2447 | yffP | 2560546 | 2561139 | + | 593  | 24  | 0  | 7  | 7  | 7  | 0%   | 29%  | 29%  | 29%  | A | P | P | P | U |
| b2448 | yffQ | 2561614 | 2561991 | + | 377  | 15  | 2  | 5  | 5  | 5  | 13%  | 33%  | 33%  | 33%  | P | P | P | P | U |
| b2449 | yffR | 2562002 | 2562394 | + | 392  | 16  | 15 | 15 | 15 | 16 | 94%  | 94%  | 94%  | 100% | P | P | P | P | U |
| b2450 | yffS | 2562545 | 2563354 | + | 809  | 32  | 29 | 30 | 30 | 30 | 91%  | 94%  | 94%  | 94%  | P | P | P | P | U |
| b2464 | talA | 2576688 | 2577638 | + | 950  | 38  | 38 | 38 | 38 | 38 | 100% | 100% | 100% | 100% | P | P | P | P |   |
| b2465 | tkkB | 2577658 | 2579661 | + | 2003 | 80  | 80 | 80 | 80 | 80 | 100% | 100% | 100% | 100% | P | P | P | P |   |
| b2469 | narQ | 2583753 | 2585453 | + | 1700 | 68  | 15 | 30 | 30 | 31 | 22%  | 44%  | 44%  | 46%  | P | P | P | P |   |
| b2470 | acrD | 2585617 | 2588730 | + | 3113 | 124 | 4  | 14 | 14 | 15 | 3%   | 11%  | 11%  | 12%  | P | P | P | P |   |
| b2471 | yffB | 2589269 | 2589625 | + | 356  | 14  | 14 | 14 | 14 | 14 | 100% | 100% | 100% | 100% | P | P | P | P | U |
| b2472 | dapE | 2589629 | 2590756 | + | 1127 | 45  | 44 | 44 | 45 | 45 | 98%  | 98%  | 100% | 100% | P | P | P | P |   |
| b4547 | ypfN | 2590784 | 2590984 | + | 200  | 8   | 8  | 8  | 8  | 8  | 100% | 100% | 100% | 100% | P | P | P | P | U |
| b2479 | gcvR | 2597928 | 2598500 | + | 572  | 23  | 23 | 23 | 23 | 23 | 100% | 100% | 100% | 100% | P | P | P | P |   |
| b2480 | bcp  | 2598500 | 2598970 | + | 470  | 19  | 19 | 19 | 19 | 19 | 100% | 100% | 100% | 100% | P | P | P | P |   |
| b2481 | hyfA | 2599223 | 2599840 | + | 617  | 25  | 0  | 0  | 3  | 3  | 0%   | 0%   | 12%  | 12%  | A | A | P | P |   |
| b2482 | hyfB | 2599840 | 2601858 | + | 2018 | 80  | 0  | 0  | 0  | 0  | 0%   | 0%   | 0%   | 0%   | A | A | A | A |   |
| b2483 | hyfC | 2601869 | 2602816 | + | 947  | 38  | 0  | 0  | 0  | 0  | 0%   | 0%   | 0%   | 0%   | A | A | A | A |   |
| b2484 | hyfD | 2602833 | 2604272 | + | 1439 | 58  | 0  | 0  | 0  | 0  | 0%   | 0%   | 0%   | 0%   | A | A | A | A |   |
| b2485 | hyfE | 2604284 | 2604934 | + | 650  | 26  | 0  | 0  | 0  | 0  | 0%   | 0%   | 0%   | 0%   | A | A | A | A |   |
| b2486 | hyfF | 2604939 | 2606519 | + | 1580 | 64  | 0  | 1  | 5  | 5  | 0%   | 2%   | 8%   | 8%   | A | P | P | P |   |
| b2487 | hyfG | 2606509 | 2608176 | + | 1667 | 67  | 0  | 0  | 5  | 5  | 0%   | 0%   | 7%   | 7%   | A | A | P | P |   |
| b2488 | hyfH | 2608186 | 2608731 | + | 545  | 22  | 0  | 0  | 0  | 0  | 0%   | 0%   | 0%   | 0%   | A | A | A | A |   |
| b2489 | hyfI | 2608728 | 2609486 | + | 758  | 30  | 0  | 0  | 2  | 2  | 0%   | 0%   | 7%   | 7%   | A | A | P | P |   |

|         |       |         |         |   |      |     |    |    |    |    |      |      |      |      |   |   |   |   |   |
|---------|-------|---------|---------|---|------|-----|----|----|----|----|------|------|------|------|---|---|---|---|---|
| b2490   | hyfJ  | 2609479 | 2609892 | + | 413  | 17  | 0  | 1  | 2  | 2  | 0%   | 6%   | 12%  | 12%  | A | P | P | P | U |
| b2491   | hyfR  | 2609922 | 2611934 | + | 2012 | 80  | 0  | 0  | 2  | 2  | 0%   | 0%   | 3%   | 3%   | A | A | P | P |   |
| b2492   | focB  | 2611956 | 2612804 | + | 848  | 34  | 0  | 5  | 5  | 5  | 0%   | 15%  | 15%  | 15%  | A | P | P | P | U |
| b2494   | yfgC  | 2614116 | 2615579 | + | 1463 | 58  | 57 | 57 | 57 | 57 | 98%  | 98%  | 98%  | 98%  | P | P | P | P | U |
| b2495   | yfgD  | 2615600 | 2615959 | + | 359  | 14  | 14 | 14 | 14 | 14 | 100% | 100% | 100% | 100% | P | P | P | P | U |
| b2499   | purM  | 2619219 | 2620256 | + | 1037 | 41  | 41 | 41 | 41 | 41 | 100% | 100% | 100% | 100% | P | P | P | P |   |
| b2500   | purN  | 2620256 | 2620894 | + | 638  | 26  | 26 | 26 | 26 | 26 | 100% | 100% | 100% | 100% | P | P | P | P |   |
| b2501   | ppk   | 2621066 | 2623132 | + | 2066 | 83  | 83 | 83 | 83 | 83 | 100% | 100% | 100% | 100% | P | P | P | P |   |
| b2502   | ppx   | 2623137 | 2624678 | + | 1541 | 62  | 61 | 61 | 61 | 61 | 98%  | 98%  | 98%  | 98%  | P | P | P | P |   |
| b2504   | yfgG  | 2627312 | 2627503 | + | 191  | 8   | 8  | 8  | 8  | 8  | 100% | 100% | 100% | 100% | P | P | P | P | U |
| b2505   | yfgH  | 2627814 | 2628332 | + | 518  | 21  | 0  | 0  | 2  | 2  | 0%   | 0%   | 10%  | 10%  | A | A | P | P | U |
| b2506   | yfgI  | 2628348 | 2628887 | + | 539  | 22  | 0  | 5  | 19 | 19 | 0%   | 23%  | 86%  | 86%  | A | P | P | P | U |
| b2509   | xseA  | 2632254 | 2633624 | + | 1370 | 54  | 52 | 52 | 52 | 52 | 96%  | 96%  | 96%  | 96%  | P | P | P | P |   |
| b2521   | sseA  | 2650516 | 2651361 | + | 845  | 34  | 33 | 33 | 33 | 34 | 97%  | 97%  | 97%  | 100% | P | P | P | P |   |
| G0-8908 | IS128 | 2651537 | 2651745 | + | 208  | 7   | 0  | 0  | 0  | 0  | 0%   | 0%   | 0%   | 0%   | A | A | A | A |   |
| b4440   | ryfA  | 2651877 | 2652180 | + | 303  | 12  | 11 | 11 | 11 | 11 | 92%  | 92%  | 92%  | 92%  | P | P | P | P | U |
| b2533   | suhB  | 2661464 | 2662267 | + | 803  | 32  | 28 | 28 | 28 | 28 | 88%  | 88%  | 88%  | 88%  | P | P | P | P |   |
| b2534   | yfhR  | 2662385 | 2663266 | + | 881  | 35  | 0  | 0  | 0  | 0  | 0%   | 0%   | 0%   | 0%   | A | A | A | A | U |
| b2535   | csiE  | 2663457 | 2664737 | + | 1280 | 51  | 15 | 15 | 51 | 51 | 29%  | 29%  | 100% | 100% | P | P | P | P | U |
| b2538   | hcaE  | 2667054 | 2668415 | + | 1361 | 54  | 24 | 24 | 24 | 24 | 44%  | 44%  | 44%  | 44%  | P | P | P | P |   |
| b2539   | hcaF  | 2668412 | 2668930 | + | 518  | 21  | 0  | 0  | 0  | 0  | 0%   | 0%   | 0%   | 0%   | A | A | A | A |   |
| b2540   | hcaC  | 2668930 | 2669250 | + | 320  | 12  | 2  | 3  | 3  | 3  | 17%  | 25%  | 25%  | 25%  | P | P | P | P | U |
| b2541   | hcaB  | 2669247 | 2670059 | + | 812  | 33  | 1  | 2  | 2  | 2  | 3%   | 6%   | 6%   | 6%   | P | P | P | P |   |
| b2542   | hcaD  | 2670069 | 2671271 | + | 1202 | 48  | 3  | 3  | 6  | 6  | 6%   | 6%   | 13%  | 13%  | P | P | P | P |   |
| b2543   | yphA  | 2671368 | 2671790 | + | 422  | 17  | 17 | 17 | 17 | 17 | 100% | 100% | 100% | 100% | P | P | P | P | U |
| b2550   | yphH  | 2680885 | 2682078 | + | 1193 | 48  | 11 | 31 | 31 | 32 | 23%  | 65%  | 65%  | 67%  | P | P | P | P | U |
| b2552   | hmp   | 2683857 | 2685047 | + | 1190 | 47  | 33 | 33 | 44 | 44 | 70%  | 70%  | 94%  | 94%  | P | P | P | P |   |
| b2558   | yfhD  | 2693823 | 2695379 | + | 1556 | 63  | 18 | 18 | 20 | 20 | 29%  | 29%  | 32%  | 32%  | P | P | P | P | U |
| b2561   | yfhH  | 2696781 | 2697629 | + | 848  | 34  | 20 | 27 | 27 | 27 | 59%  | 79%  | 79%  | 79%  | P | P | P | P | U |
| b2562   | yfhL  | 2697685 | 2697945 | + | 260  | 10  | 10 | 10 | 10 | 10 | 100% | 100% | 100% | 100% | P | P | P | P | U |
| b4608   | ryfC  | 2698542 | 2698618 | + | 76   | 1   | 0  | 0  | 0  | 0  | 0%   | 0%   | 0%   | 0%   | A | A | A | A | U |
| b2574   | nadB  | 2708442 | 2710064 | + | 1622 | 65  | 64 | 64 | 64 | 65 | 98%  | 98%  | 98%  | 100% | P | P | P | P |   |
| b2576   | srmB  | 2710918 | 2712252 | + | 1334 | 53  | 53 | 53 | 53 | 53 | 100% | 100% | 100% | 100% | P | P | P | P |   |
| b2578   | eamB  | 2713445 | 2714032 | + | 587  | 23  | 1  | 2  | 2  | 2  | 4%   | 9%   | 9%   | 9%   | P | P | P | P |   |
| b2580   | ung   | 2714776 | 2715465 | + | 689  | 28  | 28 | 28 | 28 | 28 | 100% | 100% | 100% | 100% | P | P | P | P |   |
| b2582   | trxC  | 2716757 | 2717176 | + | 419  | 17  | 17 | 17 | 17 | 17 | 100% | 100% | 100% | 100% | P | P | P | P |   |
| b2583   | yfiP  | 2717245 | 2717943 | + | 698  | 28  | 12 | 12 | 12 | 12 | 43%  | 43%  | 43%  | 43%  | P | P | P | P | U |
| b2584   | yfiQ  | 2717975 | 2720635 | + | 2660 | 106 | 69 | 69 | 94 | 94 | 65%  | 65%  | 89%  | 89%  | P | P | P | P | U |
| b2585   | pssA  | 2720749 | 2722104 | + | 1355 | 54  | 54 | 54 | 54 | 54 | 100% | 100% | 100% | 100% | P | P | P | P |   |
| b2586   | yfiM  | 2722150 | 2722473 | + | 323  | 13  | 0  | 0  | 0  | 0  | 0%   | 0%   | 0%   | 0%   | A | A | A | A | U |
| b2595   | bamD  | 2734168 | 2734905 | + | 737  | 30  | 30 | 30 | 30 | 30 | 100% | 100% | 100% | 100% | P | P | P | P | U |
| b2597   | raiA  | 2735176 | 2735517 | + | 341  | 13  | 13 | 13 | 13 | 13 | 100% | 100% | 100% | 100% | P | P | P | P |   |
| b2598   | pheL  | 2735621 | 2735668 | + | 47   | 1   | 1  | 1  | 1  | 1  | 100% | 100% | 100% | 100% | P | P | P | P |   |
| b2599   | pheA  | 2735767 | 2736927 | + | 1160 | 47  | 43 | 43 | 43 | 43 | 91%  | 91%  | 91%  | 91%  | P | P | P | P |   |
| b2602   | yfiL  | 2739382 | 2739747 | + | 365  | 15  | 0  | 10 | 15 | 15 | 0%   | 67%  | 100% | 100% | A | P | P | P | U |
| b2603   | yfiR  | 2739897 | 2740415 | + | 518  | 20  | 11 | 11 | 14 | 15 | 55%  | 55%  | 70%  | 75%  | P | P | P | P | U |

|       |      |         |         |   |      |    |    |    |    |    |      |      |      |      |   |   |   |   |   |
|-------|------|---------|---------|---|------|----|----|----|----|----|------|------|------|------|---|---|---|---|---|
| b2604 | yfiN | 2740405 | 2741631 | + | 1226 | 49 | 13 | 13 | 13 | 13 | 27%  | 27%  | 27%  | 27%  | P | P | P | P | U |
| b2605 | yfiB | 2741647 | 2742129 | + | 482  | 19 | 18 | 18 | 18 | 18 | 95%  | 95%  | 95%  | 95%  | P | P | P | P | U |
| b2611 | ypjD | 2745984 | 2746775 | + | 791  | 32 | 32 | 32 | 32 | 32 | 100% | 100% | 100% | 100% | P | P | P | P | U |
| b4461 | yfjD | 2746796 | 2748082 | + | 1286 | 51 | 43 | 43 | 43 | 44 | 84%  | 84%  | 84%  | 86%  | P | P | P | P | U |
| b2615 | nadK | 2748853 | 2749731 | + | 878  | 35 | 32 | 32 | 32 | 32 | 91%  | 91%  | 91%  | 91%  | P | P | P | P |   |
| b2616 | recN | 2749817 | 2751478 | + | 1661 | 67 | 58 | 58 | 58 | 59 | 87%  | 87%  | 87%  | 88%  | P | P | P | P |   |
| b2617 | smpA | 2751627 | 2751968 | + | 341  | 13 | 13 | 13 | 13 | 13 | 100% | 100% | 100% | 100% | P | P | P | P |   |
| b2620 | smpB | 2752918 | 2753400 | + | 482  | 20 | 20 | 20 | 20 | 20 | 100% | 100% | 100% | 100% | P | P | P | P |   |
| b2621 | ssrA | 2753615 | 2753977 | + | 362  | 15 | 15 | 15 | 15 | 15 | 100% | 100% | 100% | 100% | P | P | P | P |   |
| b2622 | intA | 2754181 | 2755422 | + | 1241 | 50 | 48 | 48 | 48 | 48 | 96%  | 96%  | 96%  | 96%  | P | P | P | P |   |
| b2624 | alpA | 2756666 | 2756878 | + | 212  | 9  | 0  | 0  | 0  | 0  | 0%   | 0%   | 0%   | 0%   | A | A | A | A |   |
| b2625 | yfjI | 2757007 | 2758416 | + | 1409 | 56 | 5  | 5  | 7  | 8  | 9%   | 9%   | 13%  | 14%  | P | P | P | P | U |
| b2626 | yfjJ | 2758569 | 2759195 | + | 626  | 25 | 0  | 0  | 0  | 0  | 0%   | 0%   | 0%   | 0%   | A | A | A | A | U |
| b2630 | rnlA | 2763940 | 2765013 | + | 1073 | 43 | 43 | 43 | 43 | 43 | 100% | 100% | 100% | 100% | P | P | P | P |   |
| b2631 | yfjO | 2765006 | 2765377 | + | 371  | 15 | 12 | 13 | 13 | 13 | 80%  | 87%  | 87%  | 87%  | P | P | P | P | U |
| b2632 | yfjP | 2765732 | 2766595 | + | 863  | 35 | 0  | 3  | 7  | 7  | 0%   | 9%   | 20%  | 20%  | A | P | P | P | U |
| b2633 | yfjQ | 2766687 | 2767508 | + | 821  | 33 | 0  | 0  | 0  | 0  | 0%   | 0%   | 0%   | 0%   | A | A | A | A | U |
| b2634 | yfjR | 2767725 | 2768426 | + | 701  | 28 | 0  | 0  | 0  | 0  | 0%   | 0%   | 0%   | 0%   | A | A | A | A | U |
| b2635 | ypjK | 2768467 | 2768703 | + | 236  | 10 | 0  | 0  | 0  | 0  | 0%   | 0%   | 0%   | 0%   | A | A | A | A | U |
| b2636 | yfjS | 2768703 | 2769146 | + | 443  | 18 | 0  | 0  | 0  | 0  | 0%   | 0%   | 0%   | 0%   | A | A | A | A | U |
| b2637 | yfjT | 2769170 | 2769637 | + | 467  | 18 | 0  | 0  | 0  | 0  | 0%   | 0%   | 0%   | 0%   | A | A | A | A | U |
| b2642 | yfjW | 2771340 | 2773043 | + | 1703 | 69 | 11 | 11 | 11 | 12 | 16%  | 16%  | 16%  | 17%  | P | P | P | P | U |
| b4644 | ypjI | 2773567 | 2773838 | + | 271  | 11 | 0  | 0  | 2  | 3  | 0%   | 0%   | 18%  | 27%  | A | A | P | P | U |
| b2643 | yfjX | 2773941 | 2774399 | + | 458  | 19 | 0  | 0  | 0  | 0  | 0%   | 0%   | 0%   | 0%   | A | A | A | A | U |
| b2644 | yfjY | 2774408 | 2774890 | + | 482  | 19 | 0  | 0  | 0  | 0  | 0%   | 0%   | 0%   | 0%   | A | A | A | A | U |
| b4548 | ypjJ | 2774899 | 2775099 | + | 200  | 8  | 0  | 0  | 0  | 0  | 0%   | 0%   | 0%   | 0%   | A | A | A | A | U |
| b2645 | yfjZ | 2775137 | 2775454 | + | 317  | 13 | 0  | 0  | 0  | 0  | 0%   | 0%   | 0%   | 0%   | A | A | A | A |   |
| b2646 | ypjF | 2775475 | 2775804 | + | 329  | 13 | 0  | 1  | 1  | 1  | 0%   | 8%   | 8%   | 8%   | A | P | P | P |   |
| b4645 | psaA | 2775994 | 2776007 | + | 13   | 0  | 0  | 0  | 0  | 0  | 0%   | 0%   | 0%   | 0%   | A | A | A | A | U |
| b4462 | ygaQ | 2784419 | 2786671 | + | 2252 | 90 | 0  | 0  | 0  | 0  | 0%   | 0%   | 0%   | 0%   | A | A | A | A | U |
| b2659 | csiD | 2787007 | 2787984 | + | 977  | 39 | 25 | 25 | 38 | 38 | 64%  | 64%  | 97%  | 97%  | P | P | P | P | U |
| b2660 | ygaF | 2788004 | 2789272 | + | 1268 | 50 | 25 | 25 | 41 | 42 | 50%  | 50%  | 82%  | 84%  | P | P | P | P | U |
| b2661 | gabD | 2789295 | 2790743 | + | 1448 | 58 | 48 | 48 | 51 | 58 | 83%  | 83%  | 88%  | 100% | P | P | P | P |   |
| b2662 | gabT | 2790757 | 2792037 | + | 1280 | 51 | 46 | 46 | 46 | 51 | 90%  | 90%  | 90%  | 100% | P | P | P | P |   |
| b2663 | gabP | 2792275 | 2793675 | + | 1400 | 56 | 3  | 3  | 3  | 55 | 5%   | 5%   | 5%   | 98%  | P | P | P | P |   |
| b2664 | csiR | 2793696 | 2794358 | + | 662  | 27 | 23 | 25 | 25 | 26 | 85%  | 93%  | 93%  | 96%  | P | P | P | P |   |
| b2667 | ygaV | 2795233 | 2795532 | + | 299  | 12 | 1  | 6  | 6  | 6  | 8%   | 50%  | 50%  | 50%  | P | P | P | P | U |
| b2668 | ygaP | 2795542 | 2796066 | + | 524  | 21 | 3  | 7  | 7  | 8  | 14%  | 33%  | 33%  | 38%  | P | P | P | P | U |
| b2670 | ygaW | 2797186 | 2797635 | + | 449  | 18 | 0  | 16 | 16 | 16 | 0%   | 89%  | 89%  | 89%  | A | P | P | P | U |
| b2672 | ygaM | 2798156 | 2798497 | + | 341  | 13 | 13 | 13 | 13 | 13 | 100% | 100% | 100% | 100% | P | P | P | P | U |
| b2673 | nrdH | 2798745 | 2798990 | + | 245  | 10 | 10 | 10 | 10 | 10 | 100% | 100% | 100% | 100% | P | P | P | P |   |
| b2674 | nrdI | 2798987 | 2799397 | + | 410  | 16 | 15 | 15 | 16 | 16 | 94%  | 94%  | 100% | 100% | P | P | P | P |   |
| b2675 | nrdE | 2799370 | 2801514 | + | 2144 | 86 | 47 | 47 | 60 | 86 | 55%  | 55%  | 70%  | 100% | P | P | P | P |   |
| b2676 | nrdF | 2801524 | 2802483 | + | 959  | 39 | 9  | 9  | 10 | 34 | 23%  | 23%  | 26%  | 87%  | P | P | P | P |   |
| b2677 | proV | 2802837 | 2804039 | + | 1202 | 48 | 44 | 44 | 44 | 44 | 92%  | 92%  | 92%  | 92%  | P | P | P | P |   |
| b2678 | proW | 2804032 | 2805096 | + | 1064 | 42 | 39 | 39 | 39 | 39 | 93%  | 93%  | 93%  | 93%  | P | P | P | P |   |

|         |       |         |         |   |      |     |    |    |    |    |      |      |      |      |   |   |   |   |   |
|---------|-------|---------|---------|---|------|-----|----|----|----|----|------|------|------|------|---|---|---|---|---|
| b2679   | proX  | 2805154 | 2806146 | + | 992  | 39  | 34 | 34 | 34 | 34 | 87%  | 87%  | 87%  | 87%  | P | P | P | P |   |
| b2681   | ygaY  | 2806338 | 2807515 | + | 1177 | 47  | 0  | 0  | 0  | 0  | 0%   | 0%   | 0%   | 0%   | A | A | A | A | U |
| b2682   | ygaZ  | 2807639 | 2808376 | + | 737  | 29  | 29 | 29 | 29 | 29 | 100% | 100% | 100% | 100% | P | P | P | P | U |
| b2683   | ygaH  | 2808366 | 2808701 | + | 335  | 13  | 13 | 13 | 13 | 13 | 100% | 100% | 100% | 100% | P | P | P | P | U |
| b2684   | mprA  | 2808792 | 2809322 | + | 530  | 21  | 21 | 21 | 21 | 21 | 100% | 100% | 100% | 100% | P | P | P | P |   |
| b2685   | emrA  | 2809449 | 2810621 | + | 1172 | 47  | 47 | 47 | 47 | 47 | 100% | 100% | 100% | 100% | P | P | P | P |   |
| b2686   | emrB  | 2810638 | 2812176 | + | 1538 | 61  | 51 | 52 | 55 | 55 | 84%  | 85%  | 90%  | 90%  | P | P | P | P |   |
| b4442   | micA  | 2812824 | 2812901 | + | 77   | 3   | 0  | 0  | 2  | 2  | 0%   | 0%   | 67%  | 67%  | A | A | P | P |   |
| b2702   | srlA  | 2823854 | 2824417 | + | 563  | 23  | 0  | 1  | 1  | 1  | 0%   | 4%   | 4%   | 4%   | A | P | P | P |   |
| b2703   | srlE  | 2824414 | 2825373 | + | 959  | 38  | 0  | 1  | 2  | 2  | 0%   | 3%   | 5%   | 5%   | A | P | P | P |   |
| b2704   | srlB  | 2825384 | 2825755 | + | 371  | 14  | 0  | 0  | 0  | 0  | 0%   | 0%   | 0%   | 0%   | A | A | A | A |   |
| b2705   | srlD  | 2825759 | 2826538 | + | 779  | 31  | 5  | 5  | 6  | 6  | 16%  | 16%  | 19%  | 19%  | P | P | P | P |   |
| b2706   | gutM  | 2826643 | 2827002 | + | 359  | 14  | 0  | 0  | 1  | 1  | 0%   | 0%   | 7%   | 7%   | A | A | P | P |   |
| b2707   | srlR  | 2827069 | 2827842 | + | 773  | 31  | 30 | 30 | 30 | 30 | 97%  | 97%  | 97%  | 97%  | P | P | P | P |   |
| b2708   | gutQ  | 2827835 | 2828800 | + | 965  | 38  | 33 | 33 | 33 | 33 | 87%  | 87%  | 87%  | 87%  | P | P | P | P | U |
| b2710   | norV  | 2830498 | 2831937 | + | 1439 | 58  | 0  | 5  | 5  | 5  | 0%   | 9%   | 9%   | 9%   | A | P | P | P |   |
| b2711   | norW  | 2831934 | 2833067 | + | 1133 | 45  | 0  | 0  | 0  | 0  | 0%   | 0%   | 0%   | 0%   | A | A | A | A |   |
| GO-8911 | C0664 | 2833077 | 2833189 | + | 112  | 5   | 0  | 0  | 0  | 0  | 0%   | 0%   | 0%   | 0%   | A | A | A | A |   |
| b2715   | ascF  | 2837546 | 2839003 | + | 1457 | 58  | 6  | 6  | 12 | 12 | 10%  | 10%  | 21%  | 21%  | P | P | P | P |   |
| b2716   | ascB  | 2839012 | 2840436 | + | 1424 | 57  | 11 | 17 | 27 | 27 | 19%  | 30%  | 47%  | 47%  | P | P | P | P |   |
| b2726   | hypA  | 2848669 | 2849019 | + | 350  | 14  | 4  | 5  | 5  | 10 | 29%  | 36%  | 36%  | 71%  | P | P | P | P |   |
| b2727   | hypB  | 2849023 | 2849895 | + | 872  | 35  | 19 | 20 | 20 | 26 | 54%  | 57%  | 57%  | 74%  | P | P | P | P |   |
| b2728   | hypC  | 2849886 | 2850158 | + | 272  | 11  | 5  | 5  | 5  | 8  | 45%  | 45%  | 45%  | 73%  | P | P | P | P |   |
| b2729   | hypD  | 2850158 | 2851279 | + | 1121 | 44  | 25 | 25 | 26 | 32 | 57%  | 57%  | 59%  | 73%  | P | P | P | P |   |
| b2730   | hypE  | 2851318 | 2852286 | + | 968  | 39  | 23 | 28 | 33 | 34 | 59%  | 72%  | 85%  | 87%  | P | P | P | P |   |
| b2731   | fhIA  | 2852360 | 2854438 | + | 2078 | 83  | 24 | 25 | 27 | 37 | 29%  | 30%  | 33%  | 45%  | P | P | P | P |   |
| b2733   | mutS  | 2855115 | 2857676 | + | 2561 | 102 | 90 | 90 | 90 | 90 | 88%  | 88%  | 88%  | 88%  | P | P | P | P |   |
| b2734   | pphB  | 2857782 | 2858438 | + | 656  | 27  | 0  | 0  | 0  | 0  | 0%   | 0%   | 0%   | 0%   | A | A | A | A |   |
| b2736   | ygbJ  | 2859452 | 2860360 | + | 908  | 37  | 1  | 2  | 37 | 37 | 3%   | 5%   | 100% | 100% | P | P | P | P | U |
| b2737   | ygbK  | 2860357 | 2861523 | + | 1166 | 47  | 1  | 1  | 46 | 46 | 2%   | 2%   | 98%  | 98%  | P | P | P | P | U |
| b2738   | ygbL  | 2861615 | 2862253 | + | 638  | 25  | 1  | 1  | 15 | 15 | 4%   | 4%   | 60%  | 60%  | P | P | P | P | U |
| b2739   | ygbM  | 2862258 | 2863034 | + | 776  | 31  | 1  | 1  | 18 | 18 | 3%   | 3%   | 58%  | 58%  | P | P | P | P | U |
| b2740   | ygbN  | 2863123 | 2864487 | + | 1364 | 55  | 1  | 1  | 4  | 4  | 2%   | 2%   | 7%   | 7%   | P | P | P | P | U |
| b2753   | iap   | 2874603 | 2875640 | + | 1037 | 42  | 33 | 33 | 33 | 34 | 79%  | 79%  | 79%  | 81%  | P | P | P | P |   |
| b2765   | sscR  | 2890236 | 2890601 | + | 365  | 14  | 13 | 13 | 13 | 13 | 93%  | 93%  | 93%  | 93%  | P | P | P | P |   |
| b2766   | ygcN  | 2890679 | 2891950 | + | 1271 | 50  | 3  | 4  | 4  | 4  | 6%   | 8%   | 8%   | 8%   | P | P | P | P | U |
| b2767   | ygcO  | 2891941 | 2892201 | + | 260  | 10  | 0  | 0  | 0  | 0  | 0%   | 0%   | 0%   | 0%   | A | A | A | A | U |
| b2768   | ygcP  | 2892218 | 2892793 | + | 575  | 23  | 0  | 1  | 1  | 1  | 0%   | 4%   | 4%   | 4%   | A | P | P | P | U |
| b2775   | yqcE  | 2898614 | 2899891 | + | 1277 | 51  | 0  | 0  | 0  | 0  | 0%   | 0%   | 0%   | 0%   | A | A | A | A | U |
| b2776   | ygcE  | 2899918 | 2901396 | + | 1478 | 59  | 0  | 3  | 5  | 5  | 0%   | 5%   | 8%   | 8%   | A | P | P | P | U |
| b2778   | ygcG  | 2903733 | 2904605 | + | 872  | 35  | 0  | 0  | 0  | 0  | 0%   | 0%   | 0%   | 0%   | A | A | A | A | U |
| b2786   | barA  | 2913079 | 2915835 | + | 2756 | 110 | 82 | 82 | 82 | 83 | 75%  | 75%  | 75%  | 75%  | P | P | P | P |   |
| b2794   | queF  | 2923370 | 2924218 | + | 848  | 34  | 33 | 33 | 33 | 33 | 97%  | 97%  | 97%  | 97%  | P | P | P | P |   |
| b2795   | ygdH  | 2924330 | 2925694 | + | 1364 | 55  | 54 | 54 | 55 | 55 | 98%  | 98%  | 100% | 100% | P | P | P | P | U |
| b2796   | sdaC  | 2926251 | 2927540 | + | 1289 | 52  | 50 | 51 | 51 | 51 | 96%  | 98%  | 98%  | 98%  | P | P | P | P | U |
| b2797   | sdaB  | 2927598 | 2928965 | + | 1367 | 55  | 26 | 26 | 26 | 26 | 47%  | 47%  | 47%  | 47%  | P | P | P | P |   |

|       |      |         |         |   |      |     |    |    |    |    |      |      |      |      |   |   |   |   |   |
|-------|------|---------|---------|---|------|-----|----|----|----|----|------|------|------|------|---|---|---|---|---|
| b2798 | ygdG | 2928987 | 2929832 | + | 845  | 34  | 18 | 18 | 18 | 18 | 53%  | 53%  | 53%  | 53%  | P | P | P | P |   |
| b2801 | fucP | 2932257 | 2933573 | + | 1316 | 53  | 0  | 1  | 3  | 3  | 0%   | 2%   | 6%   | 6%   | A | P | P | P |   |
| b2802 | fucI | 2933606 | 2935381 | + | 1775 | 71  | 0  | 1  | 4  | 4  | 0%   | 1%   | 6%   | 6%   | A | P | P | P |   |
| b2803 | fucK | 2935460 | 2936908 | + | 1448 | 58  | 13 | 13 | 15 | 16 | 22%  | 22%  | 26%  | 28%  | P | P | P | P |   |
| b2804 | fucU | 2936910 | 2937332 | + | 422  | 17  | 16 | 16 | 16 | 16 | 94%  | 94%  | 94%  | 94%  | P | P | P | P |   |
| b2805 | fucR | 2937390 | 2938121 | + | 731  | 29  | 26 | 26 | 26 | 26 | 90%  | 90%  | 90%  | 90%  | P | P | P | P |   |
| b4443 | gcvB | 2940718 | 2940923 | + | 205  | 9   | 3  | 5  | 5  | 5  | 33%  | 56%  | 56%  | 56%  | P | P | P | P |   |
| b2810 | csdA | 2941359 | 2942564 | + | 1205 | 48  | 48 | 48 | 48 | 48 | 100% | 100% | 100% | 100% | P | P | P | P |   |
| b2811 | csdE | 2942564 | 2943007 | + | 443  | 18  | 17 | 17 | 18 | 18 | 94%  | 94%  | 100% | 100% | P | P | P | P | U |
| b2814 | metZ | 2945409 | 2945485 | + | 76   | 3   | 3  | 3  | 3  | 3  | 100% | 100% | 100% | 100% | P | P | P | P |   |
| b2815 | metW | 2945519 | 2945595 | + | 76   | 3   | 3  | 3  | 3  | 3  | 100% | 100% | 100% | 100% | P | P | P | P |   |
| b2816 | metV | 2945629 | 2945705 | + | 76   | 3   | 3  | 3  | 3  | 3  | 100% | 100% | 100% | 100% | P | P | P | P |   |
| b2818 | argA | 2947264 | 2948595 | + | 1331 | 53  | 53 | 53 | 53 | 53 | 100% | 100% | 100% | 100% | P | P | P | P |   |
| b2831 | mutH | 2967684 | 2968373 | + | 689  | 27  | 10 | 11 | 12 | 12 | 37%  | 41%  | 44%  | 44%  | P | P | P | P |   |
| b2832 | ygdQ | 2968442 | 2969155 | + | 713  | 29  | 14 | 14 | 14 | 14 | 48%  | 48%  | 48%  | 48%  | P | P | P | P | U |
| b2833 | ygdR | 2969293 | 2969511 | + | 218  | 9   | 7  | 9  | 9  | 9  | 78%  | 100% | 100% | 100% | P | P | P | P | U |
| b2834 | tas  | 2969619 | 2970659 | + | 1040 | 42  | 42 | 42 | 42 | 42 | 100% | 100% | 100% | 100% | P | P | P | P | U |
| b2837 | galR | 2974621 | 2975652 | + | 1031 | 41  | 33 | 34 | 34 | 36 | 80%  | 83%  | 83%  | 88%  | P | P | P | P |   |
| b2839 | lysR | 2977043 | 2977978 | + | 935  | 38  | 12 | 12 | 12 | 12 | 32%  | 32%  | 32%  | 32%  | P | P | P | P |   |
| b2845 | yqeG | 2983869 | 2985098 | + | 1229 | 49  | 0  | 0  | 0  | 0  | 0%   | 0%   | 0%   | 0%   | A | A | A | A | U |
| b2846 | yqeH | 2985558 | 2986190 | + | 632  | 25  | 0  | 0  | 0  | 0  | 0%   | 0%   | 0%   | 0%   | A | A | A | A | U |
| b2847 | yqeI | 2986524 | 2987333 | + | 809  | 33  | 0  | 0  | 0  | 0  | 0%   | 0%   | 0%   | 0%   | A | A | A | A | U |
| b2848 | yqeJ | 2987326 | 2987808 | + | 482  | 20  | 0  | 0  | 0  | 0  | 0%   | 0%   | 0%   | 0%   | A | A | A | A | U |
| b2850 | ygeF | 2988576 | 2989065 | + | 489  | 19  | 0  | 0  | 0  | 0  | 0%   | 0%   | 0%   | 0%   | A | A | A | A | U |
| b2851 | ygeG | 2989290 | 2989781 | + | 491  | 20  | 0  | 0  | 0  | 0  | 0%   | 0%   | 0%   | 0%   | A | A | A | A | U |
| b2852 | ygeH | 2990116 | 2991492 | + | 1376 | 55  | 0  | 0  | 0  | 0  | 0%   | 0%   | 0%   | 0%   | A | A | A | A | U |
| b2853 | ygeI | 2991660 | 2991878 | + | 218  | 9   | 0  | 0  | 0  | 0  | 0%   | 0%   | 0%   | 0%   | A | A | A | A | U |
| b2854 | pbl  | 2991961 | 2992463 | + | 502  | 20  | 0  | 0  | 0  | 0  | 0%   | 0%   | 0%   | 0%   | A | A | A | A | U |
| b2866 | xdhA | 2998367 | 3000625 | + | 2258 | 91  | 3  | 3  | 17 | 24 | 3%   | 3%   | 19%  | 26%  | P | P | P | P |   |
| b2867 | xdhB | 3000636 | 3001514 | + | 878  | 35  | 2  | 2  | 3  | 3  | 6%   | 6%   | 9%   | 9%   | P | P | P | P |   |
| b2868 | xdhC | 3001511 | 3001990 | + | 479  | 19  | 1  | 1  | 3  | 4  | 5%   | 5%   | 16%  | 21%  | P | P | P | P |   |
| b2870 | ygeW | 3004284 | 3005474 | + | 1190 | 47  | 0  | 0  | 0  | 0  | 0%   | 0%   | 0%   | 0%   | A | A | A | A | U |
| b2871 | ygeX | 3005532 | 3006728 | + | 1196 | 47  | 0  | 0  | 3  | 3  | 0%   | 0%   | 6%   | 6%   | A | A | P | P |   |
| b2872 | ygeY | 3006786 | 3007997 | + | 1211 | 48  | 0  | 0  | 1  | 1  | 0%   | 0%   | 2%   | 2%   | A | A | P | P | U |
| b2873 | hyuA | 3008050 | 3009435 | + | 1385 | 56  | 0  | 0  | 3  | 3  | 0%   | 0%   | 5%   | 5%   | A | A | P | P |   |
| b2874 | yqeA | 3009483 | 3010415 | + | 932  | 37  | 0  | 0  | 2  | 2  | 0%   | 0%   | 5%   | 5%   | A | A | P | P | U |
| b2877 | ygfJ | 3013182 | 3013760 | + | 578  | 23  | 0  | 7  | 18 | 18 | 0%   | 30%  | 78%  | 78%  | A | P | P | P | U |
| b2878 | ygfK | 3014082 | 3017180 | + | 3098 | 124 | 0  | 0  | 4  | 4  | 0%   | 0%   | 3%   | 3%   | A | A | P | P | U |
| b2879 | ssnA | 3017183 | 3018511 | + | 1328 | 53  | 0  | 0  | 2  | 2  | 0%   | 0%   | 4%   | 4%   | A | A | P | P | U |
| b2880 | ygfM | 3018562 | 3019341 | + | 779  | 31  | 0  | 0  | 0  | 0  | 0%   | 0%   | 0%   | 0%   | A | A | A | A | U |
| b2881 | xdhD | 3019338 | 3022208 | + | 2870 | 115 | 0  | 0  | 14 | 14 | 0%   | 0%   | 12%  | 12%  | A | A | P | P | U |
| b2882 | ygfO | 3022373 | 3023773 | + | 1400 | 56  | 0  | 0  | 1  | 3  | 0%   | 0%   | 2%   | 5%   | A | A | P | P | U |
| b2883 | guaD | 3023788 | 3025107 | + | 1319 | 53  | 16 | 16 | 16 | 52 | 30%  | 30%  | 30%  | 98%  | P | P | P | P |   |
| b4464 | ygfQ | 3025143 | 3026510 | + | 1367 | 54  | 3  | 3  | 7  | 47 | 6%   | 6%   | 13%  | 87%  | P | P | P | P | U |
| b2888 | ygfU | 3029389 | 3030837 | + | 1448 | 58  | 0  | 0  | 0  | 0  | 0%   | 0%   | 0%   | 0%   | A | A | A | A | U |
| b2889 | idi  | 3031087 | 3031635 | + | 548  | 22  | 7  | 14 | 19 | 19 | 32%  | 64%  | 86%  | 86%  | P | P | P | P |   |



|         |       |         |         |   |      |    |    |    |    |    |      |      |      |      |   |   |   |   |   |
|---------|-------|---------|---------|---|------|----|----|----|----|----|------|------|------|------|---|---|---|---|---|
| b2895   | fldB  | 3037877 | 3038398 | + | 521  | 21 | 21 | 21 | 21 | 21 | 100% | 100% | 100% | 100% | P | P | P | P |   |
| b2898   | ygfZ  | 3039335 | 3040315 | + | 980  | 39 | 39 | 39 | 39 | 39 | 100% | 100% | 100% | 100% | P | P | P | P | U |
| b2901   | bglA  | 3041684 | 3043123 | + | 1439 | 57 | 57 | 57 | 57 | 57 | 100% | 100% | 100% | 100% | P | P | P | P |   |
| b2910   | zapA  | 3053634 | 3053963 | + | 329  | 13 | 13 | 13 | 13 | 13 | 100% | 100% | 100% | 100% | P | P | P | P |   |
| b2911   | ssrS  | 3054005 | 3054187 | + | 182  | 7  | 7  | 7  | 7  | 7  | 100% | 100% | 100% | 100% | P | P | P | P |   |
| b2912   | ygfA  | 3054263 | 3054811 | + | 548  | 22 | 11 | 11 | 11 | 11 | 50%  | 50%  | 50%  | 50%  | P | P | P | P | U |
| b4446   | rygC  | 3054871 | 3055010 | + | 139  | 6  | 4  | 4  | 4  | 4  | 67%  | 67%  | 67%  | 67%  | P | P | P | P | U |
| b2916   | argP  | 3057775 | 3058668 | + | 893  | 36 | 29 | 29 | 29 | 30 | 81%  | 81%  | 81%  | 83%  | P | P | P | P |   |
| b2917   | scpA  | 3058872 | 3061016 | + | 2144 | 86 | 0  | 0  | 0  | 0  | 0%   | 0%   | 0%   | 0%   | A | A | A | A |   |
| b2918   | argK  | 3061009 | 3062004 | + | 995  | 39 | 0  | 0  | 0  | 0  | 0%   | 0%   | 0%   | 0%   | A | A | A | A |   |
| b2919   | scpB  | 3062015 | 3062800 | + | 785  | 31 | 0  | 0  | 0  | 0  | 0%   | 0%   | 0%   | 0%   | A | A | A | A |   |
| b2920   | scpC  | 3062824 | 3064302 | + | 1478 | 59 | 0  | 0  | 0  | 0  | 0%   | 0%   | 0%   | 0%   | A | A | A | A |   |
| b2936   | yggG  | 3079935 | 3080693 | + | 758  | 30 | 29 | 29 | 29 | 29 | 97%  | 97%  | 97%  | 97%  | P | P | P | P | U |
| b2940   | yqgC  | 3084209 | 3084424 | + | 215  | 9  | 0  | 0  | 0  | 0  | 0%   | 0%   | 0%   | 0%   | A | A | A | A | U |
| b2942   | metK  | 3084728 | 3085882 | + | 1154 | 46 | 46 | 46 | 46 | 46 | 100% | 100% | 100% | 100% | P | P | P | P |   |
| b2943   | galP  | 3086306 | 3087700 | + | 1394 | 56 | 50 | 50 | 50 | 50 | 89%  | 89%  | 89%  | 89%  | P | P | P | P |   |
| b2944   | yggI  | 3087777 | 3088274 | + | 497  | 20 | 10 | 10 | 11 | 11 | 50%  | 50%  | 55%  | 55%  | P | P | P | P | U |
| b2945   | endA  | 3088369 | 3089076 | + | 707  | 29 | 0  | 0  | 14 | 14 | 0%   | 0%   | 48%  | 48%  | A | A | P | P |   |
| b2946   | rsmE  | 3089156 | 3089887 | + | 731  | 29 | 29 | 29 | 29 | 29 | 100% | 100% | 100% | 100% | P | P | P | P | U |
| b2947   | gshB  | 3089900 | 3090850 | + | 950  | 38 | 38 | 38 | 38 | 38 | 100% | 100% | 100% | 100% | P | P | P | P |   |
| b2948   | yqgE  | 3090959 | 3091522 | + | 563  | 22 | 22 | 22 | 22 | 22 | 100% | 100% | 100% | 100% | P | P | P | P | U |
| b2949   | yqgF  | 3091522 | 3091938 | + | 416  | 17 | 16 | 16 | 16 | 16 | 94%  | 94%  | 94%  | 94%  | P | P | P | P | U |
| b2951   | yggS  | 3093120 | 3093824 | + | 704  | 29 | 29 | 29 | 29 | 29 | 100% | 100% | 100% | 100% | P | P | P | P | U |
| b2952   | yggT  | 3093842 | 3094408 | + | 566  | 23 | 23 | 23 | 23 | 23 | 100% | 100% | 100% | 100% | P | P | P | P | U |
| b2953   | yggU  | 3094405 | 3094695 | + | 290  | 11 | 11 | 11 | 11 | 11 | 100% | 100% | 100% | 100% | P | P | P | P | U |
| b2954   | rdgB  | 3094703 | 3095296 | + | 593  | 23 | 23 | 23 | 23 | 23 | 100% | 100% | 100% | 100% | P | P | P | P |   |
| b2955   | yggW  | 3095289 | 3096425 | + | 1136 | 46 | 45 | 46 | 46 | 46 | 98%  | 100% | 100% | 100% | P | P | P | P | U |
| b2961   | mutY  | 3101035 | 3102087 | + | 1052 | 42 | 42 | 42 | 42 | 42 | 100% | 100% | 100% | 100% | P | P | P | P |   |
| b2962   | yggX  | 3102115 | 3102390 | + | 275  | 11 | 11 | 11 | 11 | 11 | 100% | 100% | 100% | 100% | P | P | P | P |   |
| b2963   | mltC  | 3102455 | 3103534 | + | 1079 | 43 | 41 | 41 | 41 | 41 | 95%  | 95%  | 95%  | 95%  | P | P | P | P |   |
| b2964   | nupG  | 3103736 | 3104992 | + | 1256 | 50 | 12 | 13 | 13 | 13 | 24%  | 26%  | 26%  | 26%  | P | P | P | P |   |
| b2966   | yqgA  | 3107575 | 3108282 | + | 707  | 28 | 0  | 2  | 8  | 8  | 0%   | 7%   | 29%  | 29%  | A | P | P | P | U |
| b2967   | pheV  | 3108388 | 3108463 | + | 75   | 4  | 3  | 3  | 3  | 3  | 75%  | 75%  | 75%  | 75%  | P | P | P | P |   |
| G0-8912 | C0719 | 3119380 | 3119601 | + | 221  | 9  | 3  | 8  | 8  | 8  | 33%  | 89%  | 89%  | 89%  | P | P | P | P |   |
| b2980   | glcC  | 3126294 | 3127058 | + | 764  | 30 | 28 | 28 | 28 | 28 | 93%  | 93%  | 93%  | 93%  | P | P | P | P |   |
| b2982   | insH  | 3128200 | 3129216 | + | 1016 | 41 | 41 | 41 | 41 | 41 | 100% | 100% | 100% | 100% | P | P | P | P |   |
| b2986   | yghT  | 3132153 | 3132845 | + | 692  | 28 | 0  | 0  | 0  | 0  | 0%   | 0%   | 0%   | 0%   | A | A | A | A | U |
| b2989   | yghU  | 3136749 | 3137615 | + | 866  | 35 | 35 | 35 | 35 | 35 | 100% | 100% | 100% | 100% | P | P | P | P | U |
| b3001   | yghZ  | 3145919 | 3146959 | + | 1040 | 41 | 23 | 23 | 38 | 38 | 56%  | 56%  | 93%  | 93%  | P | P | P | P |   |
| b3003   | yghA  | 3147684 | 3148568 | + | 884  | 36 | 32 | 32 | 32 | 35 | 89%  | 89%  | 89%  | 97%  | P | P | P | P | U |
| b3008   | metC  | 3150258 | 3151445 | + | 1187 | 48 | 48 | 48 | 48 | 48 | 100% | 100% | 100% | 100% | P | P | P | P |   |
| b3009   | yghB  | 3151585 | 3152244 | + | 659  | 27 | 25 | 25 | 26 | 26 | 93%  | 93%  | 96%  | 96%  | P | P | P | P | U |
| b3011   | yqhD  | 3153377 | 3154540 | + | 1163 | 46 | 46 | 46 | 46 | 46 | 100% | 100% | 100% | 100% | P | P | P | P |   |
| b3012   | dkgA  | 3154645 | 3155472 | + | 827  | 34 | 33 | 33 | 33 | 34 | 97%  | 97%  | 97%  | 100% | P | P | P | P |   |
| b3013   | yqhG  | 3155672 | 3156598 | + | 926  | 38 | 0  | 0  | 0  | 0  | 0%   | 0%   | 0%   | 0%   | A | A | A | A | U |
| b3014   | yqhH  | 3156649 | 3156906 | + | 257  | 10 | 0  | 1  | 1  | 1  | 0%   | 10%  | 10%  | 10%  | A | P | P | P | U |

|       |      |         |         |   |      |     |    |    |    |    |      |      |      |      |   |   |   |   |   |
|-------|------|---------|---------|---|------|-----|----|----|----|----|------|------|------|------|---|---|---|---|---|
| b3025 | qseB | 3167850 | 3168509 | + | 659  | 26  | 11 | 11 | 12 | 16 | 42%  | 42%  | 46%  | 62%  | P | P | P | P |   |
| b3026 | qseC | 3168506 | 3169855 | + | 1349 | 54  | 9  | 9  | 14 | 15 | 17%  | 17%  | 26%  | 28%  | P | P | P | P |   |
| b3028 | mdaB | 3170552 | 3171133 | + | 581  | 24  | 24 | 24 | 24 | 24 | 100% | 100% | 100% | 100% | P | P | P | P |   |
| b3029 | ygiN | 3171164 | 3171478 | + | 314  | 13  | 12 | 12 | 13 | 13 | 92%  | 92%  | 100% | 100% | P | P | P | P |   |
| b3035 | tolC | 3176137 | 3177618 | + | 1481 | 59  | 59 | 59 | 59 | 59 | 100% | 100% | 100% | 100% | P | P | P | P |   |
| b3037 | ygiB | 3177766 | 3178437 | + | 671  | 27  | 27 | 27 | 27 | 27 | 100% | 100% | 100% | 100% | P | P | P | P | U |
| b3038 | ygiC | 3178443 | 3179603 | + | 1160 | 47  | 45 | 45 | 45 | 45 | 96%  | 96%  | 96%  | 96%  | P | P | P | P | U |
| b3040 | zupT | 3180572 | 3181345 | + | 773  | 31  | 31 | 31 | 31 | 31 | 100% | 100% | 100% | 100% | P | P | P | P |   |
| b3042 | yqiC | 3182862 | 3183152 | + | 290  | 12  | 11 | 11 | 11 | 11 | 92%  | 92%  | 92%  | 92%  | P | P | P | P | U |
| b3043 | ygiL | 3183436 | 3183987 | + | 551  | 22  | 0  | 0  | 0  | 0  | 0%   | 0%   | 0%   | 0%   | A | A | A | A | U |
| b3046 | yqiG | 3184083 | 3184111 | + | 28   | 1   | 0  | 0  | 0  | 0  | 0%   | 0%   | 0%   | 0%   | A | A | A | A | U |
| b3044 | insC | 3184209 | 3184574 | + | 365  | 14  | 14 | 14 | 14 | 14 | 100% | 100% | 100% | 100% | P | P | P | P |   |
| b3045 | insD | 3184532 | 3185437 | + | 905  | 36  | 36 | 36 | 36 | 36 | 100% | 100% | 100% | 100% | P | P | P | P |   |
| b3046 | yqiG | 3185443 | 3187887 | + | 2444 | 98  | 0  | 1  | 1  | 1  | 0%   | 1%   | 1%   | 1%   | A | P | P | P | U |
| b3047 | yqiH | 3187903 | 3188652 | + | 749  | 30  | 0  | 0  | 0  | 0  | 0%   | 0%   | 0%   | 0%   | A | A | A | A | U |
| b3048 | yqiI | 3188654 | 3189718 | + | 1064 | 42  | 0  | 0  | 0  | 0  | 0%   | 0%   | 0%   | 0%   | A | A | A | A | U |
| b3050 | yqiJ | 3190230 | 3190859 | + | 629  | 25  | 0  | 0  | 0  | 0  | 0%   | 0%   | 0%   | 0%   | A | A | A | A | U |
| b3051 | yqiK | 3190886 | 3192547 | + | 1661 | 66  | 0  | 0  | 0  | 0  | 0%   | 0%   | 0%   | 0%   | A | A | A | A | U |
| b3055 | htrG | 3199229 | 3199849 | + | 620  | 24  | 24 | 24 | 24 | 24 | 100% | 100% | 100% | 100% | P | P | P | P | U |
| b3056 | cca  | 3199913 | 3201151 | + | 1238 | 49  | 48 | 48 | 48 | 48 | 98%  | 98%  | 98%  | 98%  | P | P | P | P |   |
| b3059 | ygiH | 3202716 | 3203333 | + | 617  | 25  | 24 | 24 | 24 | 24 | 96%  | 96%  | 96%  | 96%  | P | P | P | P | U |
| b3061 | ttdA | 3204485 | 3205396 | + | 911  | 36  | 0  | 0  | 0  | 0  | 0%   | 0%   | 0%   | 0%   | A | A | A | A |   |
| b3062 | ttdB | 3205393 | 3205998 | + | 605  | 24  | 0  | 0  | 0  | 0  | 0%   | 0%   | 0%   | 0%   | A | A | A | A |   |
| b3063 | ttdT | 3206046 | 3207509 | + | 1463 | 59  | 0  | 0  | 0  | 0  | 0%   | 0%   | 0%   | 0%   | A | A | A | A | U |
| b3065 | rpsU | 3208803 | 3209018 | + | 215  | 8   | 8  | 8  | 8  | 8  | 100% | 100% | 100% | 100% | P | P | P | P |   |
| b3066 | dnaG | 3209129 | 3210874 | + | 1745 | 69  | 69 | 69 | 69 | 69 | 100% | 100% | 100% | 100% | P | P | P | P |   |
| b3067 | rpoD | 3211069 | 3212910 | + | 1841 | 74  | 74 | 74 | 74 | 74 | 100% | 100% | 100% | 100% | P | P | P | P |   |
| b3069 | ileX | 3213620 | 3213695 | + | 75   | 3   | 2  | 2  | 2  | 2  | 67%  | 67%  | 67%  | 67%  | P | P | P | P |   |
| b3071 | yqjI | 3214801 | 3215424 | + | 623  | 25  | 24 | 25 | 25 | 25 | 96%  | 100% | 100% | 100% | P | P | P | P | U |
| b3073 | ygjG | 3217516 | 3218895 | + | 1379 | 55  | 55 | 55 | 55 | 55 | 100% | 100% | 100% | 100% | P | P | P | P |   |
| b3075 | ebgR | 3219488 | 3220471 | + | 983  | 39  | 25 | 25 | 25 | 25 | 64%  | 64%  | 64%  | 64%  | P | P | P | P |   |
| b3076 | ebgA | 3220655 | 3223747 | + | 3092 | 123 | 0  | 0  | 0  | 0  | 0%   | 0%   | 0%   | 0%   | A | A | A | A |   |
| b3077 | ebgC | 3223744 | 3224193 | + | 449  | 18  | 0  | 0  | 0  | 0  | 0%   | 0%   | 0%   | 0%   | A | A | A | A |   |
| b3078 | ygjI | 3224256 | 3225689 | + | 1433 | 57  | 0  | 0  | 0  | 0  | 0%   | 0%   | 0%   | 0%   | A | A | A | A | U |
| b3079 | ygjJ | 3225823 | 3226893 | + | 1070 | 43  | 0  | 0  | 0  | 0  | 0%   | 0%   | 0%   | 0%   | A | A | A | A | U |
| b3080 | ygjK | 3226910 | 3229261 | + | 2351 | 94  | 0  | 0  | 6  | 6  | 0%   | 0%   | 6%   | 6%   | A | A | P | P | U |
| b3081 | fadH | 3229687 | 3231705 | + | 2018 | 81  | 5  | 5  | 37 | 37 | 6%   | 6%   | 46%  | 46%  | P | P | P | P |   |
| b3085 | ygjP | 3233982 | 3234485 | + | 503  | 20  | 11 | 11 | 11 | 12 | 55%  | 55%  | 55%  | 60%  | P | P | P | P | U |
| b3086 | ygjQ | 3234562 | 3235254 | + | 692  | 28  | 0  | 0  | 0  | 0  | 0%   | 0%   | 0%   | 0%   | A | A | A | A | U |
| b3087 | ygjR | 3235333 | 3236319 | + | 986  | 39  | 32 | 32 | 38 | 38 | 82%  | 82%  | 97%  | 97%  | P | P | P | P | U |
| b4448 | psrN | 3236396 | 3236583 | + | 187  | 8   | 6  | 6  | 7  | 7  | 75%  | 75%  | 88%  | 88%  | P | P | P | P | U |
| b3088 | alx  | 3236602 | 3237567 | + | 965  | 39  | 0  | 1  | 1  | 1  | 0%   | 3%   | 3%   | 3%   | A | P | P | P | U |
| b3089 | sstT | 3237966 | 3239210 | + | 1244 | 50  | 46 | 46 | 46 | 46 | 92%  | 92%  | 92%  | 92%  | P | P | P | P |   |
| b3093 | exuT | 3243126 | 3244544 | + | 1418 | 56  | 0  | 14 | 34 | 34 | 0%   | 25%  | 61%  | 61%  | A | P | P | P |   |
| b3094 | exuR | 3244674 | 3245450 | + | 776  | 31  | 30 | 30 | 30 | 30 | 97%  | 97%  | 97%  | 97%  | P | P | P | P |   |
| b3095 | yqjA | 3245795 | 3246457 | + | 662  | 27  | 26 | 27 | 27 | 27 | 96%  | 100% | 100% | 100% | P | P | P | P | U |

|       |      |         |         |   |      |     |    |    |    |    |      |      |      |      |   |   |   |   |   |
|-------|------|---------|---------|---|------|-----|----|----|----|----|------|------|------|------|---|---|---|---|---|
| b3096 | yqjB | 3246461 | 3246844 | + | 383  | 15  | 13 | 13 | 13 | 13 | 87%  | 87%  | 87%  | 87%  | P | P | P | P | U |
| b3097 | yqjC | 3246991 | 3247359 | + | 368  | 15  | 15 | 15 | 15 | 15 | 100% | 100% | 100% | 100% | P | P | P | P | U |
| b3098 | yqjD | 3247397 | 3247702 | + | 305  | 13  | 13 | 13 | 13 | 13 | 100% | 100% | 100% | 100% | P | P | P | P | U |
| b3099 | yqjE | 3247705 | 3248109 | + | 404  | 16  | 16 | 16 | 16 | 16 | 100% | 100% | 100% | 100% | P | P | P | P | U |
| b3100 | yqjK | 3248099 | 3248398 | + | 299  | 12  | 11 | 12 | 12 | 12 | 92%  | 100% | 100% | 100% | P | P | P | P | U |
| b3101 | yqjF | 3248584 | 3248976 | + | 392  | 16  | 0  | 5  | 6  | 6  | 0%   | 31%  | 38%  | 38%  | A | P | P | P | U |
| b3102 | yqjG | 3249046 | 3250032 | + | 986  | 40  | 26 | 26 | 26 | 32 | 65%  | 65%  | 65%  | 80%  | P | P | P | P | U |
| b3103 | yhaH | 3250326 | 3250691 | + | 365  | 14  | 13 | 13 | 13 | 13 | 93%  | 93%  | 93%  | 93%  | P | P | P | P | U |
| b3104 | yhaI | 3250933 | 3251289 | + | 356  | 14  | 0  | 0  | 0  | 0  | 0%   | 0%   | 0%   | 0%   | A | A | A | A | U |
| b3106 | yhaK | 3252341 | 3253042 | + | 701  | 28  | 0  | 0  | 0  | 2  | 0%   | 0%   | 0%   | 7%   | A | A | A | P | U |
| b3107 | yhaL | 3253065 | 3253229 | + | 164  | 7   | 7  | 7  | 7  | 7  | 100% | 100% | 100% | 100% | P | P | P | P | U |
| b3119 | tdcR | 3265402 | 3265620 | + | 218  | 8   | 0  | 0  | 0  | 0  | 0%   | 0%   | 0%   | 0%   | A | A | A | A | U |
| b3120 | yhaB | 3265876 | 3266415 | + | 539  | 22  | 0  | 0  | 0  | 0  | 0%   | 0%   | 0%   | 0%   | A | A | A | A | U |
| b3121 | yhaC | 3266437 | 3267624 | + | 1187 | 47  | 0  | 0  | 0  | 0  | 0%   | 0%   | 0%   | 0%   | A | A | A | A | U |
| b3128 | garD | 3273304 | 3274875 | + | 1571 | 63  | 6  | 35 | 43 | 43 | 10%  | 56%  | 68%  | 68%  | P | P | P | P | U |
| b3129 | sohA | 3275024 | 3275359 | + | 335  | 13  | 13 | 13 | 13 | 13 | 100% | 100% | 100% | 100% | P | P | P | P | U |
| b3130 | yhaV | 3275359 | 3275823 | + | 464  | 19  | 17 | 17 | 19 | 19 | 89%  | 89%  | 100% | 100% | P | P | P | P | U |
| b3132 | kbaZ | 3276936 | 3278216 | + | 1280 | 51  | 0  | 0  | 0  | 0  | 0%   | 0%   | 0%   | 0%   | A | A | A | A | U |
| b3133 | agaV | 3278239 | 3278712 | + | 473  | 19  | 0  | 0  | 0  | 0  | 0%   | 0%   | 0%   | 0%   | A | A | A | A | U |
| b3134 | agaW | 3278723 | 3279097 | + | 374  | 15  | 0  | 0  | 0  | 0  | 0%   | 0%   | 0%   | 0%   | A | A | A | A | U |
| b3135 | agaA | 3279093 | 3279647 | + | 554  | 23  | 0  | 0  | 2  | 2  | 0%   | 0%   | 9%   | 9%   | A | A | P | P | U |
| b3136 | agaS | 3279998 | 3281152 | + | 1154 | 46  | 0  | 0  | 2  | 2  | 0%   | 0%   | 4%   | 4%   | A | A | P | P | U |
| b3137 | kbaY | 3281165 | 3282025 | + | 860  | 35  | 0  | 0  | 2  | 2  | 0%   | 0%   | 6%   | 6%   | A | A | P | P | U |
| b3138 | agaB | 3282192 | 3282668 | + | 476  | 19  | 0  | 0  | 1  | 1  | 0%   | 0%   | 5%   | 5%   | A | A | P | P | U |
| b3139 | agaC | 3282707 | 3283510 | + | 803  | 32  | 0  | 0  | 1  | 1  | 0%   | 0%   | 3%   | 3%   | A | A | P | P | U |
| b3140 | agaD | 3283500 | 3284291 | + | 791  | 31  | 0  | 0  | 2  | 2  | 0%   | 0%   | 6%   | 6%   | A | A | P | P | U |
| b3141 | agaI | 3284292 | 3285047 | + | 755  | 31  | 0  | 0  | 1  | 1  | 0%   | 0%   | 3%   | 3%   | A | A | P | P | U |
| b3142 | yraH | 3285448 | 3286032 | + | 584  | 23  | 0  | 0  | 0  | 0  | 0%   | 0%   | 0%   | 0%   | A | A | A | A | U |
| b3143 | yraI | 3286112 | 3286807 | + | 695  | 28  | 0  | 0  | 0  | 0  | 0%   | 0%   | 0%   | 0%   | A | A | A | A | U |
| b3144 | yraJ | 3286836 | 3289352 | + | 2516 | 101 | 0  | 1  | 6  | 6  | 0%   | 1%   | 6%   | 6%   | A | P | P | P | U |
| b3145 | yraK | 3289363 | 3290454 | + | 1091 | 44  | 0  | 0  | 3  | 3  | 0%   | 0%   | 7%   | 7%   | A | A | P | P | U |
| b3147 | yraM | 3291422 | 3293458 | + | 2036 | 81  | 81 | 81 | 81 | 81 | 100% | 100% | 100% | 100% | P | P | P | P | U |
| b3148 | yraN | 3293416 | 3293811 | + | 395  | 16  | 16 | 16 | 16 | 16 | 100% | 100% | 100% | 100% | P | P | P | P | U |
| b3149 | diaA | 3293831 | 3294421 | + | 590  | 24  | 24 | 24 | 24 | 24 | 100% | 100% | 100% | 100% | P | P | P | P | U |
| b3150 | yraP | 3294431 | 3295006 | + | 575  | 23  | 23 | 23 | 23 | 23 | 100% | 100% | 100% | 100% | P | P | P | P | U |
| b3153 | yhbO | 3296996 | 3297514 | + | 518  | 21  | 13 | 13 | 14 | 17 | 62%  | 62%  | 67%  | 81%  | P | P | P | P | U |
| b3155 | yhbQ | 3297988 | 3298290 | + | 302  | 12  | 7  | 7  | 7  | 7  | 58%  | 58%  | 58%  | 58%  | P | P | P | P | U |
| b3158 | yhbU | 3299507 | 3300502 | + | 995  | 40  | 0  | 18 | 18 | 30 | 0%   | 45%  | 45%  | 75%  | A | P | P | P | U |
| b3159 | yhbV | 3300511 | 3301389 | + | 878  | 35  | 0  | 12 | 12 | 12 | 0%   | 34%  | 34%  | 34%  | A | P | P | P | U |
| b3160 | yhbW | 3301470 | 3302477 | + | 1007 | 41  | 38 | 38 | 38 | 38 | 93%  | 93%  | 93%  | 93%  | P | P | P | P | U |
| b4449 | psrO | 3309247 | 3309420 | + | 173  | 6   | 0  | 0  | 0  | 0  | 0%   | 0%   | 0%   | 0%   | A | A | A | A | U |
| b3172 | argG | 3316659 | 3318002 | + | 1343 | 54  | 52 | 52 | 52 | 52 | 96%  | 96%  | 96%  | 96%  | P | P | P | P | U |
| b3180 | yhbY | 3325812 | 3326105 | + | 293  | 12  | 12 | 12 | 12 | 12 | 100% | 100% | 100% | 100% | P | P | P | P | U |
| b3182 | dacB | 3326985 | 3328418 | + | 1433 | 57  | 51 | 51 | 51 | 51 | 89%  | 89%  | 89%  | 89%  | P | P | P | P | U |
| b3187 | ispB | 3331732 | 3332703 | + | 971  | 39  | 39 | 39 | 39 | 39 | 100% | 100% | 100% | 100% | P | P | P | P | U |
| b3188 | sfsB | 3332931 | 3333209 | + | 278  | 11  | 0  | 2  | 2  | 2  | 0%   | 18%  | 18%  | 18%  | A | P | P | P | U |

|       |      |         |         |   |      |     |     |     |     |     |      |      |      |      |   |   |   |   |   |
|-------|------|---------|---------|---|------|-----|-----|-----|-----|-----|------|------|------|------|---|---|---|---|---|
| b3196 | yrbG | 3338297 | 3339274 | + | 977  | 40  | 31  | 32  | 32  | 32  | 78%  | 80%  | 80%  | 80%  | P | P | P | P | U |
| b3197 | kdsD | 3339288 | 3340274 | + | 986  | 40  | 40  | 40  | 40  | 40  | 100% | 100% | 100% | 100% | P | P | P | P |   |
| b3198 | kdsC | 3340295 | 3340861 | + | 566  | 23  | 23  | 23  | 23  | 23  | 100% | 100% | 100% | 100% | P | P | P | P |   |
| b3199 | yrbK | 3340858 | 3341433 | + | 575  | 23  | 23  | 23  | 23  | 23  | 100% | 100% | 100% | 100% | P | P | P | P | U |
| b3200 | lptA | 3341402 | 3341959 | + | 557  | 22  | 22  | 22  | 22  | 22  | 100% | 100% | 100% | 100% | P | P | P | P | U |
| b3201 | lptB | 3341966 | 3342691 | + | 725  | 29  | 29  | 29  | 29  | 29  | 100% | 100% | 100% | 100% | P | P | P | P | U |
| b3202 | rpoN | 3342739 | 3344172 | + | 1433 | 58  | 58  | 58  | 58  | 58  | 100% | 100% | 100% | 100% | P | P | P | P |   |
| b3203 | hpf  | 3344195 | 3344482 | + | 287  | 12  | 12  | 12  | 12  | 12  | 100% | 100% | 100% | 100% | P | P | P | P | U |
| b3204 | ptsN | 3344600 | 3345091 | + | 491  | 19  | 19  | 19  | 19  | 19  | 100% | 100% | 100% | 100% | P | P | P | P |   |
| b3205 | yhbJ | 3345137 | 3345991 | + | 854  | 34  | 34  | 34  | 34  | 34  | 100% | 100% | 100% | 100% | P | P | P | P | U |
| b3206 | npr  | 3345988 | 3346260 | + | 272  | 11  | 9   | 9   | 9   | 9   | 82%  | 82%  | 82%  | 82%  | P | P | P | P |   |
| b3207 | yrbL | 3346474 | 3347106 | + | 632  | 25  | 25  | 25  | 25  | 25  | 100% | 100% | 100% | 100% | P | P | P | P | U |
| b4450 | ryhA | 3348599 | 3348706 | + | 107  | 5   | 4   | 4   | 5   | 5   | 80%  | 80%  | 100% | 100% | P | P | P | P | U |
| b3212 | gltB | 3352654 | 3357207 | + | 4553 | 183 | 183 | 183 | 183 | 183 | 100% | 100% | 100% | 100% | P | P | P | P |   |
| b3213 | gltD | 3357220 | 3358638 | + | 1418 | 57  | 57  | 57  | 57  | 57  | 100% | 100% | 100% | 100% | P | P | P | P |   |
| b3214 | gltF | 3359198 | 3359962 | + | 764  | 31  | 23  | 23  | 23  | 23  | 74%  | 74%  | 74%  | 74%  | P | P | P | P |   |
| b3215 | yhcA | 3360134 | 3360808 | + | 674  | 27  | 0   | 0   | 0   | 0   | 0%   | 0%   | 0%   | 0%   | A | A | A | A | U |
| b3216 | yhcD | 3360829 | 3363210 | + | 2381 | 96  | 0   | 0   | 8   | 13  | 0%   | 0%   | 8%   | 14%  | A | A | P | P | U |
| b4569 | yhcE | 3363207 | 3363573 | + | 366  | 14  | 0   | 0   | 0   | 0   | 0%   | 0%   | 0%   | 0%   | A | A | A | A | U |
| b4569 | yhcE | 3364773 | 3364951 | + | 178  | 7   | 0   | 0   | 0   | 0   | 0%   | 0%   | 0%   | 0%   | A | A | A | A | U |
| b3219 | yhcF | 3364948 | 3365664 | + | 716  | 29  | 11  | 12  | 17  | 21  | 38%  | 41%  | 59%  | 72%  | P | P | P | P | U |
| b3220 | yhcG | 3365849 | 3366976 | + | 1127 | 45  | 1   | 1   | 1   | 1   | 2%   | 2%   | 2%   | 2%   | P | P | P | P | U |
| b3227 | dcuD | 3372891 | 3374258 | + | 1367 | 54  | 0   | 0   | 0   | 0   | 0%   | 0%   | 0%   | 0%   | A | A | A | A | U |
| b3233 | yhcB | 3378213 | 3378611 | + | 398  | 16  | 15  | 15  | 15  | 15  | 94%  | 94%  | 94%  | 94%  | P | P | P | P | U |
| b3234 | degQ | 3378765 | 3380132 | + | 1367 | 54  | 53  | 53  | 53  | 53  | 98%  | 98%  | 98%  | 98%  | P | P | P | P |   |
| b3235 | degS | 3380222 | 3381289 | + | 1067 | 43  | 42  | 42  | 42  | 42  | 98%  | 98%  | 98%  | 98%  | P | P | P | P |   |
| b3237 | argR | 3382725 | 3383195 | + | 470  | 19  | 18  | 18  | 18  | 18  | 95%  | 95%  | 95%  | 95%  | P | P | P | P |   |
| b3238 | yhcN | 3383560 | 3383823 | + | 263  | 10  | 2   | 9   | 9   | 9   | 20%  | 90%  | 90%  | 90%  | P | P | P | P | U |
| b3243 | aaeR | 3387542 | 3388471 | + | 929  | 37  | 35  | 35  | 35  | 35  | 95%  | 95%  | 95%  | 95%  | P | P | P | P | U |
| b3253 | yhdH | 3401506 | 3402480 | + | 974  | 39  | 39  | 39  | 39  | 39  | 100% | 100% | 100% | 100% | P | P | P | P | U |
| b4646 | yrdE | 3402666 | 3403053 | + | 387  | 16  | 0   | 3   | 3   | 3   | 0%   | 19%  | 19%  | 19%  | A | P | P | P | U |
| b3255 | accB | 3403458 | 3403928 | + | 470  | 19  | 19  | 19  | 19  | 19  | 100% | 100% | 100% | 100% | P | P | P | P |   |
| b3256 | accC | 3403939 | 3405288 | + | 1349 | 54  | 54  | 54  | 54  | 54  | 100% | 100% | 100% | 100% | P | P | P | P |   |
| b3257 | yhdT | 3405397 | 3405639 | + | 242  | 10  | 7   | 7   | 8   | 8   | 70%  | 70%  | 80%  | 80%  | P | P | P | P | U |
| b3258 | panF | 3405629 | 3407080 | + | 1451 | 58  | 35  | 37  | 39  | 39  | 60%  | 64%  | 67%  | 67%  | P | P | P | P |   |
| b3259 | prmA | 3407092 | 3407973 | + | 881  | 35  | 34  | 34  | 34  | 34  | 97%  | 97%  | 97%  | 97%  | P | P | P | P |   |
| b3260 | dusB | 3408302 | 3409267 | + | 965  | 39  | 39  | 39  | 39  | 39  | 100% | 100% | 100% | 100% | P | P | P | P |   |
| b3261 | fis  | 3409293 | 3409589 | + | 296  | 12  | 12  | 12  | 12  | 12  | 100% | 100% | 100% | 100% | P | P | P | P |   |
| b3262 | yhdJ | 3409675 | 3410559 | + | 884  | 36  | 0   | 0   | 0   | 0   | 0%   | 0%   | 0%   | 0%   | A | A | A | A | U |
| b3263 | yhdU | 3410643 | 3410822 | + | 179  | 7   | 4   | 4   | 4   | 4   | 57%  | 57%  | 57%  | 57%  | P | P | P | P | U |
| b3265 | acrE | 3411886 | 3413043 | + | 1157 | 46  | 0   | 0   | 0   | 0   | 0%   | 0%   | 0%   | 0%   | A | A | A | A |   |
| b3266 | acrF | 3413055 | 3416159 | + | 3104 | 125 | 0   | 0   | 5   | 5   | 0%   | 0%   | 4%   | 4%   | A | A | P | P |   |
| b3267 | yhdV | 3416412 | 3416633 | + | 221  | 9   | 0   | 0   | 0   | 5   | 0%   | 0%   | 0%   | 56%  | A | A | A | P | U |
| b3268 | yhdW | 3417064 | 3418088 | + | 1024 | 41  | 6   | 6   | 12  | 40  | 15%  | 15%  | 29%  | 98%  | P | P | P | P | U |
| b3269 | yhdX | 3418156 | 3419337 | + | 1181 | 48  | 0   | 0   | 0   | 8   | 0%   | 0%   | 0%   | 17%  | A | A | A | P | U |
| b3270 | yhdY | 3419347 | 3420450 | + | 1103 | 44  | 0   | 0   | 0   | 17  | 0%   | 0%   | 0%   | 39%  | A | A | A | P | U |

|       |      |         |         |   |      |     |     |     |     |     |      |      |      |      |   |   |   |   |   |
|-------|------|---------|---------|---|------|-----|-----|-----|-----|-----|------|------|------|------|---|---|---|---|---|
| b3271 | yhdZ | 3420458 | 3421216 | + | 758  | 30  | 2   | 8   | 8   | 27  | 7%   | 27%  | 27%  | 90%  | P | P | P | P | U |
| b3279 | yrdA | 3427258 | 3427812 | + | 554  | 22  | 22  | 22  | 22  | 22  | 100% | 100% | 100% | 100% | P | P | P | P | U |
| b3287 | def  | 3431712 | 3432221 | + | 509  | 20  | 20  | 20  | 20  | 20  | 100% | 100% | 100% | 100% | P | P | P | P |   |
| b3288 | fmt  | 3432236 | 3433183 | + | 947  | 38  | 38  | 38  | 38  | 38  | 100% | 100% | 100% | 100% | P | P | P | P |   |
| b3289 | rsmB | 3433229 | 3434518 | + | 1289 | 52  | 51  | 51  | 51  | 52  | 98%  | 98%  | 98%  | 100% | P | P | P | P |   |
| b3290 | trkA | 3434540 | 3435916 | + | 1376 | 55  | 53  | 53  | 54  | 54  | 96%  | 96%  | 98%  | 98%  | P | P | P | P |   |
| b3291 | mscL | 3436046 | 3436456 | + | 410  | 16  | 16  | 16  | 16  | 16  | 100% | 100% | 100% | 100% | P | P | P | P |   |
| b3324 | gspC | 3453600 | 3454415 | + | 815  | 32  | 0   | 0   | 0   | 13  | 0%   | 0%   | 0%   | 41%  | A | A | A | P |   |
| b3325 | gspD | 3454399 | 3456351 | + | 1952 | 78  | 0   | 0   | 2   | 24  | 0%   | 0%   | 3%   | 31%  | A | A | P | P |   |
| b3326 | gspE | 3456361 | 3457842 | + | 1481 | 59  | 0   | 0   | 3   | 10  | 0%   | 0%   | 5%   | 17%  | A | A | P | P |   |
| b3327 | gspF | 3457839 | 3459035 | + | 1196 | 48  | 0   | 0   | 0   | 0   | 0%   | 0%   | 0%   | 0%   | A | A | A | A |   |
| b3328 | gspG | 3459045 | 3459482 | + | 437  | 18  | 0   | 0   | 2   | 2   | 0%   | 0%   | 11%  | 11%  | A | A | P | P |   |
| b3329 | gspH | 3459490 | 3459999 | + | 509  | 21  | 0   | 0   | 2   | 2   | 0%   | 0%   | 10%  | 10%  | A | A | P | P | U |
| b3330 | gspI | 3459996 | 3460373 | + | 377  | 16  | 0   | 0   | 1   | 1   | 0%   | 0%   | 6%   | 6%   | A | A | P | P |   |
| b3331 | gspJ | 3460366 | 3460953 | + | 587  | 24  | 0   | 0   | 1   | 3   | 0%   | 0%   | 4%   | 13%  | A | A | P | P | U |
| b3332 | gspK | 3460946 | 3461929 | + | 983  | 40  | 0   | 0   | 3   | 3   | 0%   | 0%   | 8%   | 8%   | A | A | P | P |   |
| b3333 | gspL | 3461944 | 3463107 | + | 1163 | 47  | 0   | 0   | 2   | 2   | 0%   | 0%   | 4%   | 4%   | A | A | P | P |   |
| b3334 | gspM | 3463104 | 3463565 | + | 461  | 18  | 0   | 0   | 0   | 0   | 0%   | 0%   | 0%   | 0%   | A | A | A | A |   |
| b3335 | gspO | 3463565 | 3464242 | + | 677  | 27  | 0   | 0   | 2   | 2   | 0%   | 0%   | 7%   | 7%   | A | A | P | P |   |
| b3348 | slyX | 3475662 | 3475880 | + | 218  | 9   | 9   | 9   | 9   | 9   | 100% | 100% | 100% | 100% | P | P | P | P | U |
| b3352 | yheS | 3479311 | 3481224 | + | 1913 | 77  | 77  | 77  | 77  | 77  | 100% | 100% | 100% | 100% | P | P | P | P | U |
| b3353 | yheT | 3481224 | 3482246 | + | 1022 | 41  | 40  | 40  | 40  | 40  | 98%  | 98%  | 98%  | 98%  | P | P | P | P | U |
| b3354 | yheU | 3482240 | 3482458 | + | 218  | 9   | 9   | 9   | 9   | 9   | 100% | 100% | 100% | 100% | P | P | P | P | U |
| b3355 | prkB | 3482512 | 3483381 | + | 869  | 35  | 33  | 33  | 33  | 33  | 94%  | 94%  | 94%  | 94%  | P | P | P | P | U |
| b3357 | crp  | 3484142 | 3484774 | + | 632  | 26  | 26  | 26  | 26  | 26  | 100% | 100% | 100% | 100% | P | P | P | P |   |
| b3358 | yhfK | 3484813 | 3486915 | + | 2102 | 84  | 61  | 61  | 61  | 61  | 73%  | 73%  | 73%  | 73%  | P | P | P | P | U |
| b3364 | tsgA | 3490590 | 3491771 | + | 1181 | 47  | 33  | 33  | 33  | 33  | 70%  | 70%  | 70%  | 70%  | P | P | P | P | U |
| b3365 | nirB | 3492033 | 3494576 | + | 2543 | 102 | 0   | 94  | 94  | 100 | 0%   | 92%  | 92%  | 98%  | A | P | P | P |   |
| b3366 | nirD | 3494573 | 3494899 | + | 326  | 14  | 0   | 12  | 12  | 12  | 0%   | 86%  | 86%  | 86%  | A | P | P | P |   |
| b3367 | nirC | 3495025 | 3495831 | + | 806  | 32  | 1   | 14  | 15  | 15  | 3%   | 44%  | 47%  | 47%  | P | P | P | P |   |
| b3368 | cysG | 3495850 | 3497223 | + | 1373 | 55  | 46  | 46  | 46  | 47  | 84%  | 84%  | 84%  | 85%  | P | P | P | P |   |
| b3369 | yhfL | 3497470 | 3497637 | + | 167  | 7   | 0   | 0   | 2   | 2   | 0%   | 0%   | 29%  | 29%  | A | A | P | P | U |
| b3370 | frlA | 3497932 | 3499269 | + | 1337 | 54  | 0   | 0   | 2   | 2   | 0%   | 0%   | 4%   | 4%   | A | A | P | P | U |
| b3371 | frlB | 3499290 | 3500312 | + | 1022 | 41  | 0   | 0   | 2   | 2   | 0%   | 0%   | 5%   | 5%   | A | A | P | P |   |
| b4474 | frlC | 3500362 | 3501192 | + | 830  | 33  | 0   | 1   | 2   | 2   | 0%   | 3%   | 6%   | 6%   | A | P | P | P | U |
| b3374 | frlD | 3501189 | 3501974 | + | 785  | 31  | 0   | 1   | 2   | 2   | 0%   | 3%   | 6%   | 6%   | A | P | P | P |   |
| b3375 | frlR | 3502074 | 3502805 | + | 731  | 29  | 27  | 27  | 27  | 28  | 93%  | 93%  | 93%  | 97%  | P | P | P | P | U |
| b3396 | mrcA | 3520893 | 3523445 | + | 2552 | 102 | 101 | 101 | 101 | 101 | 99%  | 99%  | 99%  | 99%  | P | P | P | P |   |
| b3398 | yrff | 3524491 | 3526626 | + | 2135 | 85  | 71  | 71  | 71  | 71  | 84%  | 84%  | 84%  | 84%  | P | P | P | P | U |
| b3399 | yrfG | 3526691 | 3527359 | + | 668  | 26  | 26  | 26  | 26  | 26  | 100% | 100% | 100% | 100% | P | P | P | P | U |
| b3400 | hslR | 3527370 | 3527771 | + | 401  | 16  | 16  | 16  | 16  | 16  | 100% | 100% | 100% | 100% | P | P | P | P |   |
| b3401 | hslO | 3527796 | 3528674 | + | 878  | 35  | 34  | 35  | 35  | 35  | 97%  | 100% | 100% | 100% | P | P | P | P |   |
| b3403 | pck  | 3530840 | 3532462 | + | 1622 | 64  | 60  | 60  | 61  | 61  | 94%  | 94%  | 95%  | 95%  | P | P | P | P |   |
| b3406 | greB | 3534834 | 3535310 | + | 476  | 19  | 18  | 19  | 19  | 19  | 95%  | 100% | 100% | 100% | P | P | P | P |   |
| b3407 | yhgF | 3535407 | 3537728 | + | 2321 | 93  | 93  | 93  | 93  | 93  | 100% | 100% | 100% | 100% | P | P | P | P | U |
| b3408 | feoA | 3538185 | 3538412 | + | 227  | 9   | 9   | 9   | 9   | 9   | 100% | 100% | 100% | 100% | P | P | P | P |   |

|       |      |         |         |   |      |     |     |     |     |     |      |      |      |      |   |   |   |   |   |
|-------|------|---------|---------|---|------|-----|-----|-----|-----|-----|------|------|------|------|---|---|---|---|---|
| b3409 | feoB | 3538429 | 3540750 | + | 2321 | 93  | 88  | 88  | 88  | 92  | 95%  | 95%  | 95%  | 99%  | P | P | P | P |   |
| b3410 | feoC | 3540750 | 3540986 | + | 236  | 9   | 5   | 5   | 5   | 7   | 56%  | 56%  | 56%  | 78%  | P | P | P | P | U |
| b3411 | yhgA | 3541189 | 3542067 | + | 878  | 35  | 7   | 8   | 8   | 8   | 20%  | 23%  | 23%  | 23%  | P | P | P | P | U |
| b3413 | gntX | 3542904 | 3543587 | + | 683  | 27  | 15  | 15  | 15  | 15  | 56%  | 56%  | 56%  | 56%  | P | P | P | P |   |
| b3414 | gntY | 3543646 | 3544221 | + | 575  | 23  | 23  | 23  | 23  | 23  | 100% | 100% | 100% | 100% | P | P | P | P | U |
| b3415 | gntT | 3544581 | 3545897 | + | 1316 | 53  | 6   | 37  | 37  | 37  | 11%  | 70%  | 70%  | 70%  | P | P | P | P |   |
| b3418 | malT | 3551107 | 3553812 | + | 2705 | 108 | 108 | 108 | 108 | 108 | 100% | 100% | 100% | 100% | P | P | P | P | U |
| b3422 | rtcR | 3556290 | 3557888 | + | 1598 | 63  | 0   | 1   | 10  | 10  | 0%   | 2%   | 16%  | 16%  | A | P | P | P |   |
| b3426 | glpD | 3560036 | 3561541 | + | 1505 | 61  | 11  | 20  | 60  | 60  | 18%  | 33%  | 98%  | 98%  | P | P | P | P |   |
| b3434 | yhgN | 3573094 | 3573687 | + | 593  | 24  | 6   | 12  | 12  | 12  | 25%  | 50%  | 50%  | 50%  | P | P | P | P | U |
| b3441 | yhhY | 3579161 | 3579649 | + | 488  | 20  | 11  | 11  | 11  | 12  | 55%  | 55%  | 55%  | 60%  | P | P | P | P | U |
| b3442 | yhhZ | 3579886 | 3581064 | + | 1178 | 46  | 0   | 0   | 0   | 0   | 0%   | 0%   | 0%   | 0%   | A | A | A | A | U |
| b3443 | yrhA | 3581061 | 3581441 | + | 380  | 15  | 0   | 0   | 1   | 1   | 0%   | 0%   | 7%   | 7%   | A | A | P | P | U |
| b3444 | insA | 3581506 | 3581781 | + | 275  | 11  | 10  | 10  | 10  | 10  | 91%  | 91%  | 91%  | 91%  | P | P | P | P |   |
| b3445 | insB | 3581700 | 3582203 | + | 503  | 20  | 11  | 14  | 14  | 14  | 55%  | 70%  | 70%  | 70%  | P | P | P | P |   |
| b3443 | yrhA | 3582219 | 3582332 | + | 113  | 5   | 0   | 0   | 0   | 0   | 0%   | 0%   | 0%   | 0%   | A | A | A | A | U |
| b4612 | yrhD | 3582427 | 3582582 | + | 155  | 6   | 0   | 0   | 0   | 0   | 0%   | 0%   | 0%   | 0%   | A | A | A | A | U |
| b3446 | yrhB | 3582782 | 3583066 | + | 284  | 11  | 0   | 0   | 0   | 10  | 0%   | 0%   | 0%   | 91%  | A | A | A | P | U |
| b3448 | yhhA | 3584966 | 3585406 | + | 440  | 18  | 15  | 16  | 18  | 18  | 83%  | 89%  | 100% | 100% | P | P | P | P | U |
| b3459 | yhhK | 3596007 | 3596390 | + | 383  | 15  | 10  | 10  | 10  | 10  | 67%  | 67%  | 67%  | 67%  | P | P | P | P | U |
| b3465 | rsmD | 3602416 | 3603012 | + | 596  | 24  | 24  | 24  | 24  | 24  | 100% | 100% | 100% | 100% | P | P | P | P | U |
| b3466 | yhhL | 3603002 | 3603271 | + | 269  | 10  | 6   | 6   | 6   | 7   | 60%  | 60%  | 60%  | 70%  | P | P | P | P | U |
| b3468 | yhhN | 3603774 | 3604400 | + | 626  | 26  | 24  | 24  | 24  | 24  | 92%  | 92%  | 92%  | 92%  | P | P | P | P | U |
| b3469 | zntA | 3604474 | 3606672 | + | 2198 | 88  | 11  | 18  | 23  | 23  | 13%  | 20%  | 26%  | 26%  | P | P | P | P |   |
| b3471 | yhhQ | 3607240 | 3607905 | + | 665  | 27  | 19  | 19  | 19  | 19  | 70%  | 70%  | 70%  | 70%  | P | P | P | P | U |
| b3472 | dcrB | 3607978 | 3608535 | + | 557  | 22  | 21  | 21  | 21  | 21  | 95%  | 95%  | 95%  | 95%  | P | P | P | P |   |
| b3474 | yhhT | 3609888 | 3610937 | + | 1049 | 42  | 15  | 15  | 29  | 31  | 36%  | 36%  | 69%  | 74%  | P | P | P | P | U |
| b3475 | acpT | 3610992 | 3611579 | + | 587  | 24  | 23  | 23  | 23  | 23  | 96%  | 96%  | 96%  | 96%  | P | P | P | P |   |
| b3476 | nikA | 3611690 | 3613264 | + | 1574 | 63  | 0   | 4   | 6   | 6   | 0%   | 6%   | 10%  | 10%  | A | P | P | P |   |
| b3477 | nikB | 3613264 | 3614208 | + | 944  | 38  | 0   | 0   | 1   | 1   | 0%   | 0%   | 3%   | 3%   | A | A | P | P |   |
| b3478 | nikC | 3614205 | 3615038 | + | 833  | 33  | 0   | 0   | 1   | 1   | 0%   | 0%   | 3%   | 3%   | A | A | P | P |   |
| b3479 | nikD | 3615038 | 3615802 | + | 764  | 31  | 0   | 1   | 1   | 1   | 0%   | 3%   | 3%   | 3%   | A | P | P | P |   |
| b3480 | nikE | 3615799 | 3616605 | + | 806  | 33  | 2   | 3   | 3   | 3   | 6%   | 9%   | 9%   | 9%   | P | P | P | P |   |
| b3481 | nikR | 3616611 | 3617012 | + | 401  | 16  | 8   | 8   | 8   | 8   | 50%  | 50%  | 50%  | 50%  | P | P | P | P |   |
| b3482 | rhsB | 3617215 | 3621450 | + | 4235 | 170 | 50  | 54  | 69  | 69  | 29%  | 32%  | 41%  | 41%  | P | P | P | P |   |
| b3483 | yhhH | 3621422 | 3621805 | + | 383  | 16  | 0   | 1   | 1   | 1   | 0%   | 6%   | 6%   | 6%   | A | P | P | P | U |
| b4552 | yrhC | 3621910 | 3622260 | + | 350  | 14  | 0   | 7   | 7   | 7   | 0%   | 50%  | 50%  | 50%  | A | P | P | P | U |
| b3484 | yhhI | 3622401 | 3623537 | + | 1136 | 45  | 0   | 0   | 4   | 4   | 0%   | 0%   | 9%   | 9%   | A | A | P | P | U |
| b3491 | yhiM | 3632822 | 3633916 | + | 1094 | 44  | 0   | 0   | 0   | 11  | 0%   | 0%   | 0%   | 25%  | A | A | A | P | U |
| b3493 | pitA | 3635665 | 3637164 | + | 1499 | 60  | 60  | 60  | 60  | 60  | 100% | 100% | 100% | 100% | P | P | P | P |   |
| b3495 | uspA | 3638134 | 3638568 | + | 434  | 17  | 17  | 17  | 17  | 17  | 100% | 100% | 100% | 100% | P | P | P | P |   |
| b3496 | yhiP | 3638885 | 3640354 | + | 1469 | 59  | 10  | 11  | 48  | 49  | 17%  | 19%  | 81%  | 83%  | P | P | P | P | U |
| b3499 | yhiR | 3643408 | 3644250 | + | 842  | 34  | 34  | 34  | 34  | 34  | 100% | 100% | 100% | 100% | P | P | P | P | U |
| b3500 | gor  | 3644322 | 3645674 | + | 1352 | 55  | 55  | 55  | 55  | 55  | 100% | 100% | 100% | 100% | P | P | P | P |   |
| b3501 | arsR | 3646551 | 3646904 | + | 353  | 14  | 0   | 11  | 11  | 11  | 0%   | 79%  | 79%  | 79%  | A | P | P | P |   |
| b3502 | arsB | 3646958 | 3648247 | + | 1289 | 52  | 1   | 10  | 13  | 13  | 2%   | 19%  | 25%  | 25%  | P | P | P | P |   |

|       |      |         |         |   |      |     |    |    |    |    |      |      |      |      |   |   |   |   |   |
|-------|------|---------|---------|---|------|-----|----|----|----|----|------|------|------|------|---|---|---|---|---|
| b3503 | arsC | 3648260 | 3648685 | + | 425  | 18  | 10 | 11 | 11 | 11 | 56%  | 61%  | 61%  | 61%  | P | P | P | P |   |
| b3504 | yhiS | 3649314 | 3650054 | + | 740  | 29  | 0  | 0  | 0  | 0  | 0%   | 0%   | 0%   | 0%   | A | A | A | A | U |
| b3504 | yhiS | 3651254 | 3651736 | + | 482  | 20  | 0  | 0  | 0  | 0  | 0%   | 0%   | 0%   | 0%   | A | A | A | A | U |
| b3506 | slp  | 3651984 | 3652550 | + | 566  | 23  | 23 | 23 | 23 | 23 | 100% | 100% | 100% | 100% | P | P | P | P |   |
| b3507 | dctR | 3652706 | 3653236 | + | 530  | 22  | 1  | 1  | 1  | 2  | 5%   | 5%   | 5%   | 9%   | P | P | P | P | U |
| b3511 | hdeD | 3655018 | 3655590 | + | 572  | 23  | 23 | 23 | 23 | 23 | 100% | 100% | 100% | 100% | P | P | P | P |   |
| b3512 | gadE | 3656389 | 3656916 | + | 527  | 21  | 20 | 20 | 20 | 21 | 95%  | 95%  | 95%  | 100% | P | P | P | P |   |
| b3513 | mdtE | 3657255 | 3658412 | + | 1157 | 47  | 41 | 41 | 41 | 43 | 87%  | 87%  | 87%  | 91%  | P | P | P | P |   |
| b3514 | mdtF | 3658437 | 3661550 | + | 3113 | 124 | 65 | 65 | 66 | 79 | 52%  | 52%  | 53%  | 64%  | P | P | P | P |   |
| b4452 | gadY | 3662887 | 3662991 | + | 104  | 4   | 2  | 2  | 2  | 2  | 50%  | 50%  | 50%  | 50%  | P | P | P | P |   |
| b3519 | treF | 3667615 | 3669264 | + | 1649 | 66  | 49 | 49 | 64 | 64 | 74%  | 74%  | 97%  | 97%  | P | P | P | P |   |
| b3521 | yhjC | 3670437 | 3671336 | + | 899  | 36  | 22 | 25 | 25 | 25 | 61%  | 69%  | 69%  | 69%  | P | P | P | P | U |
| b3522 | yhjD | 3671385 | 3672398 | + | 1013 | 41  | 38 | 38 | 40 | 40 | 93%  | 93%  | 98%  | 98%  | P | P | P | P | U |
| b3523 | yhjE | 3672809 | 3674131 | + | 1322 | 53  | 53 | 53 | 53 | 53 | 100% | 100% | 100% | 100% | P | P | P | P | U |
| b3526 | kdgK | 3677442 | 3678371 | + | 929  | 37  | 35 | 35 | 35 | 35 | 95%  | 95%  | 95%  | 95%  | P | P | P | P |   |
| b3536 | bcsE | 3694481 | 3696052 | + | 1571 | 63  | 62 | 62 | 62 | 63 | 98%  | 98%  | 98%  | 100% | P | P | P | P | U |
| b3537 | bcsF | 3696049 | 3696240 | + | 191  | 7   | 7  | 7  | 7  | 7  | 100% | 100% | 100% | 100% | P | P | P | P | U |
| b3538 | bcsG | 3696237 | 3697916 | + | 1679 | 68  | 64 | 64 | 64 | 65 | 94%  | 94%  | 94%  | 96%  | P | P | P | P | U |
| b4454 | rdlD | 3698159 | 3698222 | + | 63   | 3   | 0  | 0  | 0  | 0  | 0%   | 0%   | 0%   | 0%   | A | A | A | A |   |
| b3539 | yhjV | 3698586 | 3699857 | + | 1271 | 51  | 9  | 9  | 9  | 9  | 18%  | 18%  | 18%  | 18%  | P | P | P | P | U |
| b3549 | tag  | 3711115 | 3711678 | + | 563  | 23  | 23 | 23 | 23 | 23 | 100% | 100% | 100% | 100% | P | P | P | P |   |
| b3550 | yiaC | 3711675 | 3712115 | + | 440  | 17  | 15 | 15 | 16 | 16 | 88%  | 88%  | 94%  | 94%  | P | P | P | P | U |
| b3552 | yiaD | 3714570 | 3715229 | + | 659  | 26  | 23 | 23 | 23 | 23 | 88%  | 88%  | 88%  | 88%  | P | P | P | P | U |
| b3553 | ghrB | 3715333 | 3716307 | + | 974  | 39  | 38 | 38 | 38 | 38 | 97%  | 97%  | 97%  | 97%  | P | P | P | P |   |
| b3555 | yiaG | 3717501 | 3717791 | + | 290  | 11  | 10 | 11 | 11 | 11 | 91%  | 100% | 100% | 100% | P | P | P | P | U |
| b3556 | cspA | 3718072 | 3718284 | + | 212  | 8   | 7  | 7  | 7  | 7  | 88%  | 88%  | 88%  | 88%  | P | P | P | P |   |
| b3557 | insJ | 3718703 | 3719224 | + | 521  | 21  | 0  | 0  | 0  | 0  | 0%   | 0%   | 0%   | 0%   | A | A | A | A |   |
| b3558 | insK | 3719221 | 3720072 | + | 851  | 34  | 0  | 3  | 3  | 3  | 0%   | 9%   | 9%   | 9%   | A | P | P | P | U |
| b4614 | sokA | 3720099 | 3720128 | + | 29   | 1   | 0  | 0  | 0  | 0  | 0%   | 0%   | 0%   | 0%   | A | A | A | A |   |
| b3561 | wecH | 3723910 | 3724905 | + | 995  | 40  | 0  | 0  | 10 | 10 | 0%   | 0%   | 25%  | 25%  | A | A | P | P | U |
| b3566 | xylF | 3729154 | 3730146 | + | 992  | 40  | 0  | 0  | 0  | 0  | 0%   | 0%   | 0%   | 0%   | A | A | A | A |   |
| b3567 | xylG | 3730224 | 3731765 | + | 1541 | 61  | 0  | 0  | 0  | 0  | 0%   | 0%   | 0%   | 0%   | A | A | A | A |   |
| b3568 | xylH | 3731743 | 3732924 | + | 1181 | 48  | 2  | 11 | 13 | 13 | 4%   | 23%  | 27%  | 27%  | P | P | P | P |   |
| b3569 | xylR | 3733002 | 3734180 | + | 1178 | 47  | 21 | 21 | 21 | 21 | 45%  | 45%  | 45%  | 45%  | P | P | P | P |   |
| b3571 | malS | 3735520 | 3737550 | + | 2030 | 81  | 6  | 7  | 14 | 14 | 7%   | 9%   | 17%  | 17%  | P | P | P | P |   |
| b3572 | avtA | 3737728 | 3738981 | + | 1253 | 50  | 50 | 50 | 50 | 50 | 100% | 100% | 100% | 100% | P | P | P | P |   |
| b3575 | yiaK | 3740756 | 3741754 | + | 998  | 40  | 0  | 0  | 4  | 4  | 0%   | 0%   | 10%  | 10%  | A | A | P | P |   |
| b3576 | yiaL | 3741766 | 3742233 | + | 467  | 19  | 0  | 0  | 0  | 0  | 0%   | 0%   | 0%   | 0%   | A | A | A | A | U |
| b3577 | yiaM | 3742351 | 3742824 | + | 473  | 19  | 0  | 0  | 0  | 0  | 0%   | 0%   | 0%   | 0%   | A | A | A | A | U |
| b3578 | yiaN | 3742827 | 3744104 | + | 1277 | 51  | 0  | 0  | 0  | 0  | 0%   | 0%   | 0%   | 0%   | A | A | A | A | U |
| b3579 | yiaO | 3744117 | 3745103 | + | 986  | 40  | 0  | 0  | 0  | 0  | 0%   | 0%   | 0%   | 0%   | A | A | A | A | U |
| b3580 | lyx  | 3745107 | 3746603 | + | 1496 | 60  | 0  | 0  | 0  | 0  | 0%   | 0%   | 0%   | 0%   | A | A | A | A |   |
| b3581 | sgbH | 3746600 | 3747262 | + | 662  | 27  | 0  | 0  | 0  | 0  | 0%   | 0%   | 0%   | 0%   | A | A | A | A |   |
| b3582 | sgbU | 3747255 | 3748115 | + | 860  | 34  | 0  | 2  | 2  | 2  | 0%   | 6%   | 6%   | 6%   | A | P | P | P | U |
| b3583 | sgbE | 3748109 | 3748804 | + | 695  | 28  | 0  | 2  | 2  | 2  | 0%   | 7%   | 7%   | 7%   | A | P | P | P |   |
| b4649 | ysaD | 3748941 | 3749132 | + | 191  | 8   | 0  | 0  | 0  | 0  | 0%   | 0%   | 0%   | 0%   | A | A | A | A | U |

|       |      |         |         |   |      |     |    |    |    |    |      |      |      |      |   |   |   |   |   |
|-------|------|---------|---------|---|------|-----|----|----|----|----|------|------|------|------|---|---|---|---|---|
| b3585 | yiaU | 3750015 | 3750989 | + | 974  | 39  | 0  | 3  | 9  | 10 | 0%   | 8%   | 23%  | 26%  | A | P | P | P | U |
| b3593 | rhsA | 3760206 | 3764339 | + | 4133 | 165 | 47 | 59 | 74 | 75 | 28%  | 36%  | 45%  | 45%  | P | P | P | P | U |
| b3594 | yibA | 3764360 | 3765202 | + | 842  | 34  | 6  | 28 | 28 | 28 | 18%  | 82%  | 82%  | 82%  | P | P | P | P | U |
| b3595 | yibJ | 3765244 | 3766188 | + | 944  | 38  | 8  | 21 | 21 | 21 | 21%  | 55%  | 55%  | 55%  | P | P | P | P | U |
| b3596 | yibG | 3766200 | 3766661 | + | 461  | 19  | 0  | 9  | 9  | 9  | 0%   | 47%  | 47%  | 47%  | A | P | P | P | U |
| b4650 | yibS | 3766662 | 3766913 | + | 251  | 10  | 0  | 3  | 3  | 3  | 0%   | 30%  | 30%  | 30%  | A | P | P | P | U |
| b4651 | yibW | 3766915 | 3767279 | + | 364  | 15  | 0  | 5  | 5  | 6  | 0%   | 33%  | 33%  | 40%  | A | P | P | P | U |
| b4615 | yibV | 3767368 | 3767703 | + | 335  | 14  | 0  | 0  | 0  | 0  | 0%   | 0%   | 0%   | 0%   | A | A | A | A | U |
| b4652 | yibU | 3767971 | 3768169 | + | 198  | 8   | 0  | 0  | 0  | 0  | 0%   | 0%   | 0%   | 0%   | A | A | A | A | U |
| b3599 | mtlA | 3770304 | 3772217 | + | 1913 | 76  | 73 | 73 | 73 | 73 | 96%  | 96%  | 96%  | 96%  | P | P | P | P |   |
| b3600 | mtlD | 3772447 | 3773595 | + | 1148 | 46  | 46 | 46 | 46 | 46 | 100% | 100% | 100% | 100% | P | P | P | P |   |
| b3601 | mtlR | 3773595 | 3774182 | + | 587  | 24  | 16 | 16 | 16 | 16 | 67%  | 67%  | 67%  | 67%  | P | P | P | P |   |
| b3602 | yibL | 3774688 | 3775050 | + | 362  | 14  | 14 | 14 | 14 | 14 | 100% | 100% | 100% | 100% | P | P | P | P | U |
| b3603 | lldP | 3775422 | 3777077 | + | 1655 | 67  | 44 | 44 | 45 | 45 | 66%  | 66%  | 67%  | 67%  | P | P | P | P |   |
| b3604 | lldR | 3777077 | 3777853 | + | 776  | 32  | 27 | 27 | 27 | 27 | 84%  | 84%  | 84%  | 84%  | P | P | P | P |   |
| b3605 | lldD | 3777850 | 3779040 | + | 1190 | 48  | 48 | 48 | 48 | 48 | 100% | 100% | 100% | 100% | P | P | P | P |   |
| b3606 | yibK | 3779238 | 3779711 | + | 473  | 19  | 15 | 15 | 17 | 17 | 79%  | 79%  | 89%  | 89%  | P | P | P | P | U |
| b3612 | gpmM | 3783283 | 3784827 | + | 1544 | 62  | 62 | 62 | 62 | 62 | 100% | 100% | 100% | 100% | P | P | P | P |   |
| b3613 | envC | 3784861 | 3786120 | + | 1259 | 50  | 49 | 49 | 49 | 49 | 98%  | 98%  | 98%  | 98%  | P | P | P | P |   |
| b3614 | yibQ | 3786124 | 3787083 | + | 959  | 39  | 34 | 34 | 34 | 34 | 87%  | 87%  | 87%  | 87%  | P | P | P | P | U |
| b3619 | rfaD | 3792010 | 3792942 | + | 932  | 37  | 37 | 37 | 37 | 37 | 100% | 100% | 100% | 100% | P | P | P | P |   |
| b3620 | rfaF | 3792952 | 3793998 | + | 1046 | 42  | 42 | 42 | 42 | 42 | 100% | 100% | 100% | 100% | P | P | P | P |   |
| b3621 | rfaC | 3794002 | 3794961 | + | 959  | 39  | 39 | 39 | 39 | 39 | 100% | 100% | 100% | 100% | P | P | P | P |   |
| b3622 | rfaL | 3794971 | 3796230 | + | 1259 | 51  | 41 | 41 | 41 | 41 | 80%  | 80%  | 80%  | 80%  | P | P | P | P |   |
| b3633 | waaA | 3806563 | 3807840 | + | 1277 | 51  | 50 | 50 | 50 | 50 | 98%  | 98%  | 98%  | 98%  | P | P | P | P |   |
| b3634 | coaD | 3807848 | 3808327 | + | 479  | 19  | 17 | 17 | 17 | 17 | 89%  | 89%  | 89%  | 89%  | P | P | P | P |   |
| b3639 | dfp  | 3810754 | 3811974 | + | 1220 | 49  | 49 | 49 | 49 | 49 | 100% | 100% | 100% | 100% | P | P | P | P |   |
| b3640 | dut  | 3811955 | 3812410 | + | 455  | 19  | 19 | 19 | 19 | 19 | 100% | 100% | 100% | 100% | P | P | P | P |   |
| b3641 | slmA | 3812517 | 3813113 | + | 596  | 24  | 23 | 23 | 23 | 23 | 96%  | 96%  | 96%  | 96%  | P | P | P | P |   |
| b3644 | yicC | 3814699 | 3815562 | + | 863  | 35  | 35 | 35 | 35 | 35 | 100% | 100% | 100% | 100% | P | P | P | P | U |
| b3645 | dinD | 3815783 | 3816607 | + | 824  | 33  | 0  | 0  | 0  | 0  | 0%   | 0%   | 0%   | 0%   | A | A | A | A |   |
| b3646 | yicG | 3816897 | 3817514 | + | 617  | 25  | 0  | 0  | 0  | 0  | 0%   | 0%   | 0%   | 0%   | A | A | A | A | U |
| b3648 | gmk  | 3819451 | 3820074 | + | 623  | 25  | 25 | 25 | 25 | 25 | 100% | 100% | 100% | 100% | P | P | P | P |   |
| b3649 | rpoZ | 3820129 | 3820404 | + | 275  | 11  | 11 | 11 | 11 | 11 | 100% | 100% | 100% | 100% | P | P | P | P |   |
| b3650 | spoT | 3820423 | 3822531 | + | 2108 | 85  | 85 | 85 | 85 | 85 | 100% | 100% | 100% | 100% | P | P | P | P |   |
| b3651 | trmH | 3822538 | 3823227 | + | 689  | 27  | 27 | 27 | 27 | 27 | 100% | 100% | 100% | 100% | P | P | P | P |   |
| b3652 | recG | 3823233 | 3825314 | + | 2081 | 83  | 75 | 75 | 75 | 75 | 90%  | 90%  | 90%  | 90%  | P | P | P | P |   |
| b3654 | yicE | 3826968 | 3828359 | + | 1391 | 56  | 55 | 55 | 55 | 55 | 98%  | 98%  | 98%  | 98%  | P | P | P | P | U |
| b3655 | yicH | 3828480 | 3830189 | + | 1709 | 69  | 66 | 66 | 66 | 66 | 96%  | 96%  | 96%  | 96%  | P | P | P | P | U |
| b3658 | selC | 3834245 | 3834339 | + | 94   | 4   | 4  | 4  | 4  | 4  | 100% | 100% | 100% | 100% | P | P | P | P |   |
| b4653 | yicT | 3834448 | 3834579 | + | 131  | 5   | 0  | 0  | 0  | 0  | 0%   | 0%   | 0%   | 0%   | A | A | A | A | U |
| b3659 | setC | 3834976 | 3836160 | + | 1184 | 48  | 0  | 0  | 0  | 0  | 0%   | 0%   | 0%   | 0%   | A | A | A | A | U |
| b3660 | yicL | 3836271 | 3837194 | + | 923  | 37  | 27 | 27 | 27 | 29 | 73%  | 73%  | 73%  | 78%  | P | P | P | P | U |
| b4555 | yicS | 3838238 | 3838531 | + | 293  | 12  | 0  | 5  | 5  | 5  | 0%   | 42%  | 42%  | 42%  | A | P | P | P | U |
| b3665 | ade  | 3841987 | 3843753 | + | 1766 | 70  | 16 | 16 | 25 | 25 | 23%  | 23%  | 36%  | 36%  | P | P | P | P |   |
| b4617 | tisA | 3851466 | 3851579 | + | 113  | 4   | 4  | 4  | 4  | 4  | 100% | 100% | 100% | 100% | P | P | P | P | U |



|       |      |         |         |   |      |     |     |     |     |     |      |      |      |      |   |   |   |   |   |
|-------|------|---------|---------|---|------|-----|-----|-----|-----|-----|------|------|------|------|---|---|---|---|---|
| b4618 | tisB | 3851576 | 3851665 | + | 89   | 4   | 4   | 4   | 4   | 4   | 100% | 100% | 100% | 100% | P | P | P | P |   |
| b3673 | emrD | 3851945 | 3853129 | + | 1184 | 47  | 0   | 3   | 5   | 5   | 0%   | 6%   | 11%  | 11%  | A | P | P | P |   |
| b3677 | yidI | 3854438 | 3854887 | + | 449  | 18  | 6   | 6   | 6   | 6   | 33%  | 33%  | 33%  | 33%  | P | P | P | P | U |
| b3680 | yidL | 3858276 | 3859199 | + | 923  | 37  | 0   | 1   | 1   | 1   | 0%   | 3%   | 3%   | 3%   | A | P | P | P | U |
| b3684 | yidP | 3861922 | 3862638 | + | 716  | 29  | 0   | 0   | 0   | 0   | 0%   | 0%   | 0%   | 0%   | A | A | A | A | U |
| b3688 | yidQ | 3865751 | 3866083 | + | 332  | 14  | 14  | 14  | 14  | 14  | 100% | 100% | 100% | 100% | P | P | P | P | U |
| b3690 | cbrA | 3867400 | 3868464 | + | 1064 | 43  | 0   | 0   | 0   | 0   | 0%   | 0%   | 0%   | 0%   | A | A | A | A | U |
| b3696 | yidX | 3873461 | 3874117 | + | 656  | 26  | 6   | 6   | 17  | 17  | 23%  | 23%  | 65%  | 65%  | P | P | P | P | U |
| b3703 | rpmH | 3882359 | 3882499 | + | 140  | 6   | 6   | 6   | 6   | 6   | 100% | 100% | 100% | 100% | P | P | P | P |   |
| b3704 | rnpA | 3882516 | 3882875 | + | 359  | 15  | 15  | 15  | 15  | 15  | 100% | 100% | 100% | 100% | P | P | P | P |   |
| b4557 | yidD | 3882839 | 3883096 | + | 257  | 11  | 11  | 11  | 11  | 11  | 100% | 100% | 100% | 100% | P | P | P | P | U |
| b3705 | yidC | 3883099 | 3884745 | + | 1646 | 65  | 63  | 63  | 63  | 63  | 97%  | 97%  | 97%  | 97%  | P | P | P | P |   |
| b3706 | mnmE | 3884851 | 3886215 | + | 1364 | 54  | 53  | 53  | 53  | 53  | 98%  | 98%  | 98%  | 98%  | P | P | P | P |   |
| b3707 | tnaC | 3886458 | 3886532 | + | 74   | 3   | 2   | 2   | 2   | 2   | 67%  | 67%  | 67%  | 67%  | P | P | P | P |   |
| b3708 | tnaA | 3886753 | 3888168 | + | 1415 | 56  | 0   | 2   | 5   | 5   | 0%   | 4%   | 9%   | 9%   | A | P | P | P |   |
| b3709 | tnaB | 3888259 | 3889506 | + | 1247 | 50  | 0   | 0   | 0   | 0   | 0%   | 0%   | 0%   | 0%   | A | A | A | A |   |
| b3710 | mdtL | 3889638 | 3890813 | + | 1175 | 47  | 3   | 3   | 3   | 3   | 6%   | 6%   | 6%   | 6%   | P | P | P | P |   |
| b3711 | yidZ | 3890788 | 3891747 | + | 959  | 39  | 21  | 21  | 21  | 21  | 54%  | 54%  | 54%  | 54%  | P | P | P | P | U |
| b3712 | yieE | 3891892 | 3892653 | + | 761  | 31  | 24  | 24  | 24  | 29  | 77%  | 77%  | 77%  | 94%  | P | P | P | P | U |
| b3713 | yieF | 3892675 | 3893241 | + | 566  | 22  | 21  | 21  | 21  | 22  | 95%  | 95%  | 95%  | 100% | P | P | P | P |   |
| b3715 | yieH | 3894797 | 3895462 | + | 665  | 27  | 25  | 25  | 25  | 25  | 93%  | 93%  | 93%  | 93%  | P | P | P | P | U |
| b3716 | cbrB | 3895529 | 3895996 | + | 467  | 18  | 1   | 2   | 3   | 3   | 6%   | 11%  | 17%  | 17%  | P | P | P | P | U |
| b3717 | cbrC | 3896045 | 3896632 | + | 587  | 24  | 7   | 12  | 13  | 14  | 29%  | 50%  | 54%  | 58%  | P | P | P | P | U |
| b3744 | asnA | 3925178 | 3926170 | + | 992  | 40  | 35  | 35  | 35  | 35  | 88%  | 88%  | 88%  | 88%  | P | P | P | P |   |
| b3747 | kup  | 3929339 | 3931207 | + | 1868 | 75  | 61  | 61  | 61  | 61  | 81%  | 81%  | 81%  | 81%  | P | P | P | P |   |
| b3748 | rbsD | 3931374 | 3931793 | + | 419  | 17  | 16  | 16  | 16  | 16  | 94%  | 94%  | 94%  | 94%  | P | P | P | P | U |
| b3749 | rbsA | 3931801 | 3933306 | + | 1505 | 60  | 54  | 54  | 54  | 54  | 90%  | 90%  | 90%  | 90%  | P | P | P | P |   |
| b3750 | rbsC | 3933311 | 3934276 | + | 965  | 38  | 31  | 31  | 31  | 31  | 82%  | 82%  | 82%  | 82%  | P | P | P | P |   |
| b3751 | rbsB | 3934301 | 3935191 | + | 890  | 36  | 36  | 36  | 36  | 36  | 100% | 100% | 100% | 100% | P | P | P | P |   |
| b3752 | rbsK | 3935317 | 3936246 | + | 929  | 37  | 37  | 37  | 37  | 37  | 100% | 100% | 100% | 100% | P | P | P | P |   |
| b3753 | rbsR | 3936250 | 3937242 | + | 992  | 40  | 13  | 13  | 14  | 14  | 33%  | 33%  | 35%  | 35%  | P | P | P | P |   |
| b3756 | rrsC | 3939831 | 3941372 | + | 1541 | 62  | 62  | 62  | 62  | 62  | 100% | 100% | 100% | 100% | P | P | P | P |   |
| b3757 | gltU | 3941458 | 3941533 | + | 75   | 3   | 3   | 3   | 3   | 3   | 100% | 100% | 100% | 100% | P | P | P | P |   |
| b3758 | rrlC | 3941727 | 3944630 | + | 2903 | 116 | 116 | 116 | 116 | 116 | 100% | 100% | 100% | 100% | P | P | P | P |   |
| b3759 | rrfC | 3944723 | 3944842 | + | 119  | 5   | 5   | 5   | 5   | 5   | 100% | 100% | 100% | 100% | P | P | P | P |   |
| b3760 | aspT | 3944895 | 3944971 | + | 76   | 3   | 3   | 3   | 3   | 3   | 100% | 100% | 100% | 100% | P | P | P | P |   |
| b3761 | trpT | 3944980 | 3945055 | + | 75   | 3   | 3   | 3   | 3   | 3   | 100% | 100% | 100% | 100% | P | P | P | P |   |
| b3764 | yifE | 3946109 | 3946447 | + | 338  | 14  | 14  | 14  | 14  | 14  | 100% | 100% | 100% | 100% | P | P | P | P | U |
| b3766 | ilvL | 3948345 | 3948443 | + | 98   | 4   | 4   | 4   | 4   | 4   | 100% | 100% | 100% | 100% | P | P | P | P |   |
| b4488 | ilvG | 3948583 | 3950227 | + | 1644 | 65  | 65  | 65  | 65  | 65  | 100% | 100% | 100% | 100% | P | P | P | P | U |
| b3769 | ilvM | 3950224 | 3950487 | + | 263  | 11  | 11  | 11  | 11  | 11  | 100% | 100% | 100% | 100% | P | P | P | P |   |
| b3770 | ilvE | 3950507 | 3951436 | + | 929  | 38  | 38  | 38  | 38  | 38  | 100% | 100% | 100% | 100% | P | P | P | P |   |
| b3771 | ilvD | 3951501 | 3953351 | + | 1850 | 74  | 74  | 74  | 74  | 74  | 100% | 100% | 100% | 100% | P | P | P | P |   |
| b3772 | ilvA | 3953354 | 3954898 | + | 1544 | 62  | 61  | 61  | 61  | 61  | 98%  | 98%  | 98%  | 98%  | P | P | P | P |   |
| b3774 | ilvC | 3955993 | 3957468 | + | 1475 | 59  | 59  | 59  | 59  | 59  | 100% | 100% | 100% | 100% | P | P | P | P |   |
| b3778 | rep  | 3958700 | 3960721 | + | 2021 | 81  | 78  | 78  | 78  | 78  | 96%  | 96%  | 96%  | 96%  | P | P | P | P |   |

|       |      |         |         |   |      |     |     |     |     |     |      |      |      |      |   |   |   |   |
|-------|------|---------|---------|---|------|-----|-----|-----|-----|-----|------|------|------|------|---|---|---|---|
| b3781 | trxA | 3963784 | 3964113 | + | 329  | 14  | 14  | 14  | 14  | 14  | 100% | 100% | 100% | 100% | P | P | P | P |
| b3783 | rho  | 3964440 | 3965699 | + | 1259 | 50  | 48  | 48  | 48  | 48  | 96%  | 96%  | 96%  | 96%  | P | P | P | P |
| b3784 | rfe  | 3965939 | 3967042 | + | 1103 | 44  | 44  | 44  | 44  | 44  | 100% | 100% | 100% | 100% | P | P | P | P |
| b3785 | wzzE | 3967054 | 3968100 | + | 1046 | 42  | 42  | 42  | 42  | 42  | 100% | 100% | 100% | 100% | P | P | P | P |
| b3786 | rffE | 3968156 | 3969286 | + | 1130 | 45  | 44  | 44  | 44  | 44  | 98%  | 98%  | 98%  | 98%  | P | P | P | P |
| b3787 | rffD | 3969283 | 3970545 | + | 1262 | 51  | 51  | 51  | 51  | 51  | 100% | 100% | 100% | 100% | P | P | P | P |
| b3788 | rffG | 3970545 | 3971612 | + | 1067 | 43  | 43  | 43  | 43  | 43  | 100% | 100% | 100% | 100% | P | P | P | P |
| b3789 | rffH | 3971631 | 3972512 | + | 881  | 36  | 36  | 36  | 36  | 36  | 100% | 100% | 100% | 100% | P | P | P | P |
| b3790 | rffC | 3972490 | 3973164 | + | 674  | 27  | 27  | 27  | 27  | 27  | 100% | 100% | 100% | 100% | P | P | P | P |
| b3791 | rffA | 3973169 | 3974299 | + | 1130 | 45  | 43  | 43  | 43  | 43  | 96%  | 96%  | 96%  | 96%  | P | P | P | P |
| b3792 | wzzE | 3974301 | 3975551 | + | 1250 | 50  | 44  | 44  | 44  | 44  | 88%  | 88%  | 88%  | 88%  | P | P | P | P |
| b4481 | rffT | 3975548 | 3976627 | + | 1079 | 43  | 33  | 33  | 33  | 34  | 77%  | 77%  | 77%  | 79%  | P | P | P | P |
| b3793 | wzyE | 3976624 | 3977976 | + | 1352 | 54  | 29  | 29  | 29  | 29  | 54%  | 54%  | 54%  | 54%  | P | P | P | P |
| b3794 | rffM | 3977979 | 3978719 | + | 740  | 30  | 23  | 23  | 23  | 23  | 77%  | 77%  | 77%  | 77%  | P | P | P | P |
| b3795 | yifK | 3978910 | 3980295 | + | 1385 | 56  | 56  | 56  | 56  | 56  | 100% | 100% | 100% | 100% | P | P | P | P |
| b3796 | argX | 3980398 | 3980474 | + | 76   | 3   | 3   | 3   | 3   | 3   | 100% | 100% | 100% | 100% | P | P | P | P |
| b3797 | hisR | 3980532 | 3980608 | + | 76   | 3   | 3   | 3   | 3   | 3   | 100% | 100% | 100% | 100% | P | P | P | P |
| b3798 | leuT | 3980629 | 3980715 | + | 86   | 4   | 4   | 4   | 4   | 4   | 100% | 100% | 100% | 100% | P | P | P | P |
| b3799 | proM | 3980758 | 3980834 | + | 76   | 3   | 3   | 3   | 3   | 3   | 100% | 100% | 100% | 100% | P | P | P | P |
| b3800 | aslB | 3980981 | 3982216 | + | 1235 | 50  | 0   | 0   | 2   | 2   | 0%   | 0%   | 4%   | 4%   | A | A | P | P |
| b4456 | glmZ | 3984455 | 3984626 | + | 171  | 7   | 7   | 7   | 7   | 7   | 100% | 100% | 100% | 100% | P | P | P | P |
| b3806 | cyaA | 3989176 | 3991722 | + | 2546 | 102 | 102 | 102 | 102 | 102 | 100% | 100% | 100% | 100% | P | P | P | P |
| b4558 | yifL | 3992545 | 3992748 | + | 203  | 8   | 8   | 8   | 8   | 8   | 100% | 100% | 100% | 100% | P | P | P | P |
| b3809 | dapF | 3992785 | 3993609 | + | 824  | 33  | 33  | 33  | 33  | 33  | 100% | 100% | 100% | 100% | P | P | P | P |
| b3810 | yigA | 3993606 | 3994313 | + | 707  | 28  | 28  | 28  | 28  | 28  | 100% | 100% | 100% | 100% | P | P | P | P |
| b3811 | xerC | 3994310 | 3995206 | + | 896  | 36  | 35  | 35  | 35  | 35  | 97%  | 97%  | 97%  | 97%  | P | P | P | P |
| b3812 | yigB | 3995206 | 3995922 | + | 716  | 29  | 28  | 28  | 28  | 28  | 97%  | 97%  | 97%  | 97%  | P | P | P | P |
| b3813 | uvrD | 3996006 | 3998168 | + | 2162 | 87  | 82  | 82  | 82  | 82  | 94%  | 94%  | 94%  | 94%  | P | P | P | P |
| b3816 | corA | 3999449 | 4000399 | + | 950  | 38  | 37  | 37  | 37  | 37  | 97%  | 97%  | 97%  | 97%  | P | P | P | P |
| b3821 | pldA | 4002885 | 4003754 | + | 869  | 35  | 33  | 33  | 33  | 33  | 94%  | 94%  | 94%  | 94%  | P | P | P | P |
| b3822 | recQ | 4003887 | 4005716 | + | 1829 | 74  | 69  | 69  | 69  | 69  | 93%  | 93%  | 93%  | 93%  | P | P | P | P |
| b3823 | rhtC | 4005780 | 4006400 | + | 620  | 25  | 22  | 22  | 22  | 23  | 88%  | 88%  | 88%  | 92%  | P | P | P | P |
| b3825 | pldB | 4007193 | 4008215 | + | 1022 | 41  | 40  | 40  | 40  | 40  | 98%  | 98%  | 98%  | 98%  | P | P | P | P |
| b3826 | yigL | 4008223 | 4009023 | + | 800  | 32  | 28  | 28  | 28  | 28  | 88%  | 88%  | 88%  | 88%  | P | P | P | P |
| b3827 | yigM | 4009099 | 4009998 | + | 899  | 36  | 13  | 13  | 13  | 13  | 36%  | 36%  | 36%  | 36%  | P | P | P | P |
| b3829 | metE | 4011076 | 4013337 | + | 2261 | 90  | 90  | 90  | 90  | 90  | 100% | 100% | 100% | 100% | P | P | P | P |
| b3831 | udp  | 4014454 | 4015215 | + | 761  | 31  | 30  | 31  | 31  | 31  | 97%  | 100% | 100% | 100% | P | P | P | P |
| b3832 | rmuC | 4015356 | 4016783 | + | 1427 | 57  | 27  | 29  | 29  | 29  | 47%  | 51%  | 51%  | 51%  | P | P | P | P |
| b3833 | ubiE | 4016878 | 4017633 | + | 755  | 30  | 30  | 30  | 30  | 30  | 100% | 100% | 100% | 100% | P | P | P | P |
| b3834 | yigP | 4017647 | 4018252 | + | 605  | 24  | 24  | 24  | 24  | 24  | 100% | 100% | 100% | 100% | P | P | P | P |
| b3835 | ubiB | 4018249 | 4019889 | + | 1640 | 65  | 62  | 62  | 62  | 62  | 95%  | 95%  | 95%  | 95%  | P | P | P | P |
| b3836 | tatA | 4019968 | 4020237 | + | 269  | 10  | 10  | 10  | 10  | 10  | 100% | 100% | 100% | 100% | P | P | P | P |
| b3838 | tatB | 4020241 | 4020756 | + | 515  | 20  | 20  | 20  | 20  | 20  | 100% | 100% | 100% | 100% | P | P | P | P |
| b3839 | tatC | 4020759 | 4021535 | + | 776  | 31  | 31  | 31  | 31  | 31  | 100% | 100% | 100% | 100% | P | P | P | P |
| b4483 | tatD | 4021577 | 4022359 | + | 782  | 31  | 27  | 27  | 27  | 27  | 87%  | 87%  | 87%  | 87%  | P | P | P | P |
| b3843 | ubiD | 4023011 | 4024504 | + | 1493 | 60  | 60  | 60  | 60  | 60  | 100% | 100% | 100% | 100% | P | P | P | P |

|       |      |         |         |   |      |     |     |     |     |     |      |      |      |      |   |   |   |   |   |
|-------|------|---------|---------|---|------|-----|-----|-----|-----|-----|------|------|------|------|---|---|---|---|---|
| b3844 | fre  | 4024550 | 4025251 | + | 701  | 28  | 28  | 28  | 28  | 28  | 100% | 100% | 100% | 100% | P | P | P | P |   |
| b3847 | pepQ | 4029184 | 4030515 | + | 1331 | 53  | 53  | 53  | 53  | 53  | 100% | 100% | 100% | 100% | P | P | P | P |   |
| b3848 | yigZ | 4030515 | 4031129 | + | 614  | 25  | 25  | 25  | 25  | 25  | 100% | 100% | 100% | 100% | P | P | P | P | U |
| b3849 | trkH | 4031168 | 4032619 | + | 1451 | 58  | 54  | 54  | 55  | 55  | 93%  | 93%  | 95%  | 95%  | P | P | P | P |   |
| b3850 | hemG | 4032631 | 4033176 | + | 545  | 22  | 22  | 22  | 22  | 22  | 100% | 100% | 100% | 100% | P | P | P | P |   |
| b3851 | rrsA | 4033554 | 4035095 | + | 1541 | 62  | 62  | 62  | 62  | 62  | 100% | 100% | 100% | 100% | P | P | P | P |   |
| b3852 | ileT | 4035164 | 4035240 | + | 76   | 3   | 3   | 3   | 3   | 3   | 100% | 100% | 100% | 100% | P | P | P | P |   |
| b3853 | alaT | 4035283 | 4035358 | + | 75   | 3   | 3   | 3   | 3   | 3   | 100% | 100% | 100% | 100% | P | P | P | P |   |
| b3854 | rrlA | 4035542 | 4038446 | + | 2904 | 117 | 117 | 117 | 117 | 117 | 100% | 100% | 100% | 100% | P | P | P | P |   |
| b3855 | rrfA | 4038540 | 4038659 | + | 119  | 5   | 5   | 5   | 5   | 5   | 100% | 100% | 100% | 100% | P | P | P | P |   |
| b3858 | yihD | 4040092 | 4040361 | + | 269  | 11  | 11  | 11  | 11  | 11  | 100% | 100% | 100% | 100% | P | P | P | P | U |
| b3859 | rdoA | 4040438 | 4041424 | + | 986  | 39  | 39  | 39  | 39  | 39  | 100% | 100% | 100% | 100% | P | P | P | P |   |
| b3860 | dsbA | 4041441 | 4042067 | + | 626  | 25  | 25  | 25  | 25  | 25  | 100% | 100% | 100% | 100% | P | P | P | P |   |
| b3861 | yihF | 4042222 | 4043652 | + | 1430 | 57  | 0   | 0   | 1   | 1   | 0%   | 0%   | 2%   | 2%   | A | A | P | P | U |
| b3863 | polA | 4044989 | 4047775 | + | 2786 | 111 | 111 | 111 | 111 | 111 | 100% | 100% | 100% | 100% | P | P | P | P |   |
| b3864 | spf  | 4047922 | 4048030 | + | 108  | 4   | 4   | 4   | 4   | 4   | 100% | 100% | 100% | 100% | P | P | P | P |   |
| b4457 | csrC | 4049059 | 4049303 | + | 244  | 9   | 8   | 8   | 8   | 8   | 89%  | 89%  | 89%  | 89%  | P | P | P | P |   |
| b3866 | yihI | 4049370 | 4049879 | + | 509  | 20  | 20  | 20  | 20  | 20  | 100% | 100% | 100% | 100% | P | P | P | P | U |
| b3867 | hemN | 4050068 | 4051441 | + | 1373 | 55  | 52  | 52  | 52  | 52  | 95%  | 95%  | 95%  | 95%  | P | P | P | P |   |
| b3871 | typA | 4056430 | 4058253 | + | 1823 | 73  | 73  | 73  | 73  | 73  | 100% | 100% | 100% | 100% | P | P | P | P |   |
| b3872 | yihL | 4058470 | 4059180 | + | 710  | 28  | 0   | 0   | 0   | 1   | 0%   | 0%   | 0%   | 4%   | A | A | A | P | U |
| b3873 | yihM | 4059188 | 4060168 | + | 980  | 39  | 0   | 0   | 0   | 0   | 0%   | 0%   | 0%   | 0%   | A | A | A | A | U |
| b3874 | yihN | 4060270 | 4061535 | + | 1265 | 51  | 0   | 0   | 4   | 4   | 0%   | 0%   | 8%   | 8%   | A | A | P | P | U |
| b3883 | yihV | 4071762 | 4072658 | + | 896  | 36  | 0   | 14  | 24  | 24  | 0%   | 39%  | 67%  | 67%  | A | P | P | P | U |
| b3884 | yihW | 4072692 | 4073477 | + | 785  | 31  | 31  | 31  | 31  | 31  | 100% | 100% | 100% | 100% | P | P | P | P | U |
| b3885 | yihX | 4073576 | 4074175 | + | 599  | 24  | 24  | 24  | 24  | 24  | 100% | 100% | 100% | 100% | P | P | P | P | U |
| b3886 | yihY | 4074169 | 4075041 | + | 872  | 35  | 31  | 31  | 32  | 32  | 89%  | 89%  | 91%  | 91%  | P | P | P | P | U |
| b3887 | dtd  | 4075038 | 4075475 | + | 437  | 17  | 17  | 17  | 17  | 17  | 100% | 100% | 100% | 100% | P | P | P | P |   |
| b3888 | yiiD | 4075472 | 4076461 | + | 989  | 40  | 40  | 40  | 40  | 40  | 100% | 100% | 100% | 100% | P | P | P | P | U |
| b3889 | yiiE | 4077320 | 4077532 | + | 212  | 8   | 0   | 0   | 0   | 0   | 0%   | 0%   | 0%   | 0%   | A | A | A | A | U |
| b3890 | yiiF | 4077774 | 4077992 | + | 218  | 9   | 0   | 1   | 1   | 1   | 0%   | 11%  | 11%  | 11%  | A | P | P | P | U |
| b3895 | fdhD | 4084039 | 4084872 | + | 833  | 33  | 26  | 26  | 27  | 27  | 79%  | 79%  | 82%  | 82%  | P | P | P | P |   |
| b3896 | yiiG | 4085025 | 4086080 | + | 1055 | 42  | 0   | 0   | 0   | 0   | 0%   | 0%   | 0%   | 0%   | A | A | A | A | U |
| b3905 | rhaS | 4095759 | 4096595 | + | 836  | 34  | 0   | 0   | 4   | 4   | 0%   | 0%   | 12%  | 12%  | A | A | P | P |   |
| b3906 | rhaR | 4096669 | 4097517 | + | 848  | 34  | 0   | 0   | 0   | 0   | 0%   | 0%   | 0%   | 0%   | A | A | A | A |   |
| b3908 | sodA | 4098833 | 4099453 | + | 620  | 25  | 25  | 25  | 25  | 25  | 100% | 100% | 100% | 100% | P | P | P | P |   |
| b3909 | kdgT | 4099713 | 4100696 | + | 983  | 40  | 3   | 13  | 14  | 14  | 8%   | 33%  | 35%  | 35%  | P | P | P | P |   |
| b3910 | yiiM | 4100845 | 4101519 | + | 674  | 27  | 26  | 26  | 27  | 27  | 96%  | 96%  | 100% | 100% | P | P | P | P | U |
| b4484 | cpxP | 4103843 | 4104343 | + | 500  | 20  | 20  | 20  | 20  | 20  | 100% | 100% | 100% | 100% | P | P | P | P |   |
| b3915 | fieF | 4104492 | 4105394 | + | 902  | 36  | 36  | 36  | 36  | 36  | 100% | 100% | 100% | 100% | P | P | P | P |   |
| b3916 | pfkA | 4105575 | 4106537 | + | 962  | 38  | 38  | 38  | 38  | 38  | 100% | 100% | 100% | 100% | P | P | P | P |   |
| b3917 | sbp  | 4106857 | 4107846 | + | 989  | 40  | 38  | 38  | 38  | 38  | 95%  | 95%  | 95%  | 95%  | P | P | P | P |   |
| b3918 | cdh  | 4107953 | 4108708 | + | 755  | 30  | 24  | 24  | 24  | 24  | 80%  | 80%  | 80%  | 80%  | P | P | P | P |   |
| b3921 | yiiR | 4110338 | 4110778 | + | 440  | 18  | 13  | 13  | 16  | 17  | 72%  | 72%  | 89%  | 94%  | P | P | P | P | U |
| b3922 | yiiS | 4110990 | 4111289 | + | 299  | 12  | 12  | 12  | 12  | 12  | 100% | 100% | 100% | 100% | P | P | P | P | U |
| b3923 | uspD | 4111316 | 4111744 | + | 428  | 17  | 17  | 17  | 17  | 17  | 100% | 100% | 100% | 100% | P | P | P | P |   |

|       |      |         |         |   |      |     |     |     |     |     |      |      |      |      |   |   |   |   |   |
|-------|------|---------|---------|---|------|-----|-----|-----|-----|-----|------|------|------|------|---|---|---|---|---|
| b3928 | yiiU | 4116538 | 4116783 | + | 245  | 10  | 10  | 10  | 10  | 10  | 100% | 100% | 100% | 100% | P | P | P | P | U |
| b3936 | rpmE | 4125036 | 4125248 | + | 212  | 9   | 9   | 9   | 9   | 9   | 100% | 100% | 100% | 100% | P | P | P | P |   |
| b3939 | metB | 4126695 | 4127855 | + | 1160 | 47  | 47  | 47  | 47  | 47  | 100% | 100% | 100% | 100% | P | P | P | P |   |
| b3940 | metL | 4127858 | 4130290 | + | 2432 | 97  | 93  | 94  | 94  | 94  | 96%  | 97%  | 97%  | 97%  | P | P | P | P |   |
| b3941 | metF | 4130639 | 4131529 | + | 890  | 36  | 36  | 36  | 36  | 36  | 100% | 100% | 100% | 100% | P | P | P | P |   |
| b3942 | katG | 4131858 | 4134038 | + | 2180 | 87  | 87  | 87  | 87  | 87  | 100% | 100% | 100% | 100% | P | P | P | P |   |
| b3943 | yijE | 4134131 | 4135036 | + | 905  | 36  | 4   | 5   | 5   | 5   | 11%  | 14%  | 14%  | 14%  | P | P | P | P | U |
| b3949 | frwC | 4140553 | 4141632 | + | 1079 | 43  | 0   | 0   | 1   | 1   | 0%   | 0%   | 2%   | 2%   | A | A | P | P | U |
| b3950 | frwB | 4141647 | 4141967 | + | 320  | 13  | 0   | 3   | 3   | 3   | 0%   | 23%  | 23%  | 23%  | A | P | P | P | U |
| b3951 | pflD | 4142018 | 4144315 | + | 2297 | 92  | 0   | 0   | 6   | 6   | 0%   | 0%   | 7%   | 7%   | A | A | P | P | U |
| b3952 | pflC | 4144281 | 4145159 | + | 878  | 35  | 0   | 0   | 2   | 2   | 0%   | 0%   | 6%   | 6%   | A | A | P | P |   |
| b3953 | frwD | 4145161 | 4145502 | + | 341  | 14  | 0   | 0   | 2   | 2   | 0%   | 0%   | 14%  | 14%  | A | A | P | P | U |
| b3958 | argC | 4153024 | 4154028 | + | 1004 | 40  | 40  | 40  | 40  | 40  | 100% | 100% | 100% | 100% | P | P | P | P |   |
| b3959 | argB | 4154036 | 4154812 | + | 776  | 31  | 31  | 31  | 31  | 31  | 100% | 100% | 100% | 100% | P | P | P | P |   |
| b3960 | argH | 4154873 | 4156246 | + | 1373 | 55  | 55  | 55  | 55  | 55  | 100% | 100% | 100% | 100% | P | P | P | P |   |
| b3961 | oxyR | 4156513 | 4157430 | + | 917  | 36  | 33  | 33  | 33  | 33  | 92%  | 92%  | 92%  | 92%  | P | P | P | P |   |
| b3963 | fabR | 4159147 | 4159794 | + | 647  | 26  | 26  | 26  | 26  | 26  | 100% | 100% | 100% | 100% | P | P | P | P |   |
| b3964 | yijD | 4159794 | 4160153 | + | 359  | 14  | 14  | 14  | 14  | 14  | 100% | 100% | 100% | 100% | P | P | P | P | U |
| b3966 | btuB | 4161662 | 4163506 | + | 1844 | 73  | 71  | 71  | 71  | 71  | 97%  | 97%  | 97%  | 97%  | P | P | P | P |   |
| b3967 | murI | 4163451 | 4164308 | + | 857  | 34  | 33  | 33  | 33  | 33  | 97%  | 97%  | 97%  | 97%  | P | P | P | P |   |
| b3968 | rrsB | 4164682 | 4166223 | + | 1541 | 62  | 62  | 62  | 62  | 62  | 100% | 100% | 100% | 100% | P | P | P | P |   |
| b3969 | gltT | 4166395 | 4166470 | + | 75   | 3   | 3   | 3   | 3   | 3   | 100% | 100% | 100% | 100% | P | P | P | P |   |
| b3970 | rrlB | 4166664 | 4169567 | + | 2903 | 116 | 116 | 116 | 116 | 116 | 100% | 100% | 100% | 100% | P | P | P | P |   |
| b3971 | rrfB | 4169660 | 4169779 | + | 119  | 5   | 5   | 5   | 5   | 5   | 100% | 100% | 100% | 100% | P | P | P | P |   |
| b3972 | murB | 4170080 | 4171108 | + | 1028 | 41  | 41  | 41  | 41  | 41  | 100% | 100% | 100% | 100% | P | P | P | P |   |
| b3973 | birA | 4171105 | 4172070 | + | 965  | 39  | 31  | 31  | 32  | 32  | 79%  | 79%  | 82%  | 82%  | P | P | P | P |   |
| b3976 | thrU | 4173411 | 4173486 | + | 75   | 3   | 3   | 3   | 3   | 3   | 100% | 100% | 100% | 100% | P | P | P | P |   |
| b3977 | tyrU | 4173495 | 4173579 | + | 84   | 3   | 3   | 3   | 3   | 3   | 100% | 100% | 100% | 100% | P | P | P | P |   |
| b3978 | glyT | 4173696 | 4173770 | + | 74   | 3   | 3   | 3   | 3   | 3   | 100% | 100% | 100% | 100% | P | P | P | P |   |
| b3979 | thrT | 4173777 | 4173852 | + | 75   | 3   | 3   | 3   | 3   | 3   | 100% | 100% | 100% | 100% | P | P | P | P |   |
| b3980 | tufB | 4173967 | 4175151 | + | 1184 | 47  | 47  | 47  | 47  | 47  | 100% | 100% | 100% | 100% | P | P | P | P |   |
| b3981 | secE | 4175381 | 4175764 | + | 383  | 16  | 16  | 16  | 16  | 16  | 100% | 100% | 100% | 100% | P | P | P | P |   |
| b3982 | nusG | 4175766 | 4176311 | + | 545  | 22  | 22  | 22  | 22  | 22  | 100% | 100% | 100% | 100% | P | P | P | P |   |
| b3983 | rplK | 4176470 | 4176898 | + | 428  | 17  | 17  | 17  | 17  | 17  | 100% | 100% | 100% | 100% | P | P | P | P |   |
| b3984 | rplA | 4176902 | 4177606 | + | 704  | 28  | 28  | 28  | 28  | 28  | 100% | 100% | 100% | 100% | P | P | P | P |   |
| b3985 | rplJ | 4178019 | 4178516 | + | 497  | 20  | 20  | 20  | 20  | 20  | 100% | 100% | 100% | 100% | P | P | P | P |   |
| b3986 | rplL | 4178583 | 4178948 | + | 365  | 15  | 15  | 15  | 15  | 15  | 100% | 100% | 100% | 100% | P | P | P | P |   |
| b3987 | rpoB | 4179268 | 4183296 | + | 4028 | 161 | 161 | 161 | 161 | 161 | 100% | 100% | 100% | 100% | P | P | P | P |   |
| b3988 | rpoC | 4183373 | 4187596 | + | 4223 | 169 | 168 | 168 | 168 | 168 | 99%  | 99%  | 99%  | 99%  | P | P | P | P |   |
| b3989 | yjaZ | 4187809 | 4188348 | + | 539  | 21  | 0   | 0   | 0   | 0   | 0%   | 0%   | 0%   | 0%   | A | A | A | A |   |
| b3996 | nudC | 4194926 | 4195699 | + | 773  | 31  | 31  | 31  | 31  | 31  | 100% | 100% | 100% | 100% | P | P | P | P |   |
| b3997 | hemE | 4195739 | 4196803 | + | 1064 | 43  | 43  | 43  | 43  | 43  | 100% | 100% | 100% | 100% | P | P | P | P |   |
| b3998 | nfi  | 4196813 | 4197484 | + | 671  | 27  | 26  | 26  | 26  | 26  | 96%  | 96%  | 96%  | 96%  | P | P | P | P |   |
| b3999 | yjaG | 4197527 | 4198117 | + | 590  | 23  | 23  | 23  | 23  | 23  | 100% | 100% | 100% | 100% | P | P | P | P | U |
| b4000 | hupA | 4198304 | 4198576 | + | 272  | 11  | 11  | 11  | 11  | 11  | 100% | 100% | 100% | 100% | P | P | P | P |   |
| b4001 | yjaH | 4198589 | 4199284 | + | 695  | 28  | 18  | 18  | 18  | 18  | 64%  | 64%  | 64%  | 64%  | P | P | P | P | U |

|       |      |         |         |   |      |     |     |     |     |     |      |      |      |      |   |   |   |   |   |
|-------|------|---------|---------|---|------|-----|-----|-----|-----|-----|------|------|------|------|---|---|---|---|---|
| b4003 | zraS | 4199949 | 4201346 | + | 1397 | 56  | 7   | 13  | 13  | 13  | 13%  | 23%  | 23%  | 23%  | P | P | P | P |   |
| b4004 | zraR | 4201343 | 4202668 | + | 1325 | 53  | 33  | 33  | 33  | 33  | 62%  | 62%  | 62%  | 62%  | P | P | P | P |   |
| b4007 | rrsE | 4206170 | 4207711 | + | 1541 | 62  | 62  | 62  | 62  | 62  | 100% | 100% | 100% | 100% | P | P | P | P |   |
| b4008 | gltV | 4207797 | 4207872 | + | 75   | 3   | 3   | 3   | 3   | 3   | 100% | 100% | 100% | 100% | P | P | P | P |   |
| b4009 | rrlE | 4208066 | 4210969 | + | 2903 | 116 | 116 | 116 | 116 | 116 | 100% | 100% | 100% | 100% | P | P | P | P |   |
| b4010 | rrfE | 4211063 | 4211182 | + | 119  | 5   | 5   | 5   | 5   | 5   | 100% | 100% | 100% | 100% | P | P | P | P |   |
| b4011 | yjaA | 4211257 | 4211640 | + | 383  | 15  | 0   | 0   | 0   | 0   | 0%   | 0%   | 0%   | 0%   | A | A | A | A | U |
| b4013 | metA | 4212303 | 4213232 | + | 929  | 37  | 37  | 37  | 37  | 37  | 100% | 100% | 100% | 100% | P | P | P | P |   |
| b4014 | aceB | 4213501 | 4215102 | + | 1601 | 65  | 65  | 65  | 65  | 65  | 100% | 100% | 100% | 100% | P | P | P | P |   |
| b4015 | aceA | 4215132 | 4216436 | + | 1304 | 52  | 52  | 52  | 52  | 52  | 100% | 100% | 100% | 100% | P | P | P | P |   |
| b4016 | aceK | 4216619 | 4218355 | + | 1736 | 70  | 68  | 68  | 68  | 68  | 97%  | 97%  | 97%  | 97%  | P | P | P | P |   |
| b4019 | metH | 4221851 | 4225534 | + | 3683 | 148 | 147 | 147 | 147 | 147 | 99%  | 99%  | 99%  | 99%  | P | P | P | P |   |
| b4020 | yjbB | 4225754 | 4227385 | + | 1631 | 66  | 42  | 42  | 43  | 43  | 64%  | 64%  | 65%  | 65%  | P | P | P | P | U |
| b4022 | rluF | 4228377 | 4229249 | + | 872  | 35  | 32  | 32  | 32  | 32  | 91%  | 91%  | 91%  | 91%  | P | P | P | P |   |
| b4025 | pgi  | 4231781 | 4233430 | + | 1649 | 66  | 66  | 66  | 66  | 66  | 100% | 100% | 100% | 100% | P | P | P | P |   |
| b4026 | yjbE | 4233929 | 4234171 | + | 242  | 10  | 3   | 3   | 3   | 3   | 30%  | 30%  | 30%  | 30%  | P | P | P | P | U |
| b4027 | yjbF | 4234285 | 4234923 | + | 638  | 25  | 0   | 0   | 0   | 0   | 0%   | 0%   | 0%   | 0%   | A | A | A | A | U |
| b4028 | yjbG | 4234920 | 4235657 | + | 737  | 29  | 0   | 0   | 0   | 0   | 0%   | 0%   | 0%   | 0%   | A | A | A | A | U |
| b4029 | yjbH | 4235657 | 4237753 | + | 2096 | 84  | 10  | 11  | 13  | 13  | 12%  | 13%  | 15%  | 15%  | P | P | P | P | U |
| b4030 | psiE | 4238348 | 4238758 | + | 410  | 17  | 7   | 11  | 11  | 17  | 41%  | 65%  | 65%  | 100% | P | P | P | P | U |
| b4035 | malK | 4244807 | 4245922 | + | 1115 | 45  | 20  | 20  | 20  | 20  | 44%  | 44%  | 44%  | 44%  | P | P | P | P |   |
| b4036 | lamB | 4245994 | 4247334 | + | 1340 | 54  | 45  | 45  | 45  | 45  | 83%  | 83%  | 83%  | 83%  | P | P | P | P |   |
| b4037 | malM | 4247577 | 4248497 | + | 920  | 37  | 21  | 25  | 30  | 30  | 57%  | 68%  | 81%  | 81%  | P | P | P | P |   |
| b4038 | yjbI | 4248726 | 4250306 | + | 1580 | 63  | 0   | 0   | 0   | 0   | 0%   | 0%   | 0%   | 0%   | A | A | A | A | U |
| b4039 | ubiC | 4250529 | 4251026 | + | 497  | 20  | 20  | 20  | 20  | 20  | 100% | 100% | 100% | 100% | P | P | P | P |   |
| b4040 | ubiA | 4251039 | 4251911 | + | 872  | 35  | 33  | 33  | 33  | 33  | 94%  | 94%  | 94%  | 94%  | P | P | P | P |   |
| b4042 | dgkA | 4254660 | 4255028 | + | 368  | 15  | 15  | 15  | 15  | 15  | 100% | 100% | 100% | 100% | P | P | P | P |   |
| b4043 | lexA | 4255138 | 4255746 | + | 608  | 25  | 22  | 22  | 22  | 22  | 88%  | 88%  | 88%  | 88%  | P | P | P | P |   |
| b4044 | dinF | 4255765 | 4257144 | + | 1379 | 56  | 14  | 15  | 16  | 16  | 25%  | 27%  | 29%  | 29%  | P | P | P | P |   |
| b4045 | yjbJ | 4257260 | 4257469 | + | 209  | 9   | 5   | 8   | 8   | 8   | 56%  | 89%  | 89%  | 89%  | P | P | P | P | U |
| b4047 | yjbL | 4258344 | 4258598 | + | 254  | 10  | 0   | 0   | 0   | 0   | 0%   | 0%   | 0%   | 0%   | A | A | A | A | U |
| b4048 | yjbM | 4258622 | 4259329 | + | 707  | 28  | 0   | 0   | 0   | 0   | 0%   | 0%   | 0%   | 0%   | A | A | A | A | U |
| b4049 | dusA | 4259737 | 4260729 | + | 992  | 40  | 39  | 39  | 39  | 39  | 98%  | 98%  | 98%  | 98%  | P | P | P | P |   |
| b4050 | pspG | 4260863 | 4261105 | + | 242  | 10  | 0   | 4   | 5   | 5   | 0%   | 40%  | 50%  | 50%  | A | P | P | P |   |
| b4052 | dnaB | 4262337 | 4263752 | + | 1415 | 57  | 57  | 57  | 57  | 57  | 100% | 100% | 100% | 100% | P | P | P | P |   |
| b4053 | alr  | 4263805 | 4264884 | + | 1079 | 43  | 36  | 36  | 36  | 36  | 84%  | 84%  | 84%  | 84%  | P | P | P | P |   |
| b4054 | tyrB | 4265137 | 4266330 | + | 1193 | 48  | 48  | 48  | 48  | 48  | 100% | 100% | 100% | 100% | P | P | P | P |   |
| b4055 | aphA | 4267437 | 4268150 | + | 713  | 29  | 5   | 5   | 7   | 7   | 17%  | 17%  | 24%  | 24%  | P | P | P | P |   |
| b4056 | yjbQ | 4268261 | 4268677 | + | 416  | 17  | 17  | 17  | 17  | 17  | 100% | 100% | 100% | 100% | P | P | P | P | U |
| b4057 | yjbR | 4268681 | 4269037 | + | 356  | 14  | 12  | 12  | 12  | 12  | 86%  | 86%  | 86%  | 86%  | P | P | P | P | U |
| b4059 | ssb  | 4272148 | 4272684 | + | 536  | 21  | 19  | 19  | 19  | 19  | 90%  | 90%  | 90%  | 90%  | P | P | P | P |   |
| b4061 | yjcC | 4273494 | 4275080 | + | 1586 | 63  | 0   | 0   | 53  | 53  | 0%   | 0%   | 84%  | 84%  | A | A | P | P | U |
| b4063 | soxR | 4275492 | 4275956 | + | 464  | 19  | 0   | 17  | 17  | 17  | 0%   | 89%  | 89%  | 89%  | A | P | P | P |   |
| b4064 | yjcD | 4276502 | 4277851 | + | 1349 | 54  | 53  | 53  | 53  | 53  | 98%  | 98%  | 98%  | 98%  | P | P | P | P | U |
| b4065 | yjcE | 4278003 | 4279652 | + | 1649 | 66  | 57  | 57  | 57  | 57  | 86%  | 86%  | 86%  | 86%  | P | P | P | P | U |
| b4070 | nrfA | 4285787 | 4287223 | + | 1436 | 58  | 0   | 0   | 3   | 7   | 0%   | 0%   | 5%   | 12%  | A | A | P | P |   |

|       |      |         |         |   |      |    |    |    |    |    |      |      |      |      |   |   |   |   |   |
|-------|------|---------|---------|---|------|----|----|----|----|----|------|------|------|------|---|---|---|---|---|
| b4071 | nrfB | 4287268 | 4287834 | + | 566  | 23 | 0  | 0  | 0  | 0  | 0%   | 0%   | 0%   | 0%   | A | A | A | A |   |
| b4072 | nrfC | 4287831 | 4288502 | + | 671  | 27 | 0  | 0  | 0  | 0  | 0%   | 0%   | 0%   | 0%   | A | A | A | A |   |
| b4073 | nrfD | 4288499 | 4289455 | + | 956  | 38 | 0  | 0  | 0  | 0  | 0%   | 0%   | 0%   | 0%   | A | A | A | A |   |
| b4074 | nrfE | 4289535 | 4291193 | + | 1658 | 67 | 0  | 0  | 0  | 0  | 0%   | 0%   | 0%   | 0%   | A | A | A | A |   |
| b4075 | nrfF | 4291186 | 4291569 | + | 383  | 16 | 0  | 0  | 0  | 0  | 0%   | 0%   | 0%   | 0%   | A | A | A | A |   |
| b4076 | nrfG | 4291566 | 4292162 | + | 596  | 24 | 0  | 0  | 0  | 0  | 0%   | 0%   | 0%   | 0%   | A | A | A | A |   |
| b4077 | gltP | 4292504 | 4293817 | + | 1313 | 52 | 52 | 52 | 52 | 52 | 100% | 100% | 100% | 100% | P | P | P | P |   |
| b4090 | rpiB | 4311373 | 4311822 | + | 449  | 18 | 12 | 14 | 14 | 15 | 67%  | 78%  | 78%  | 83%  | P | P | P | P |   |
| b4487 | yjdP | 4311891 | 4312220 | + | 329  | 14 | 12 | 13 | 13 | 13 | 86%  | 93%  | 93%  | 93%  | P | P | P | P | U |
| b4109 | yjdA | 4325158 | 4327386 | + | 2228 | 89 | 15 | 20 | 20 | 20 | 17%  | 22%  | 22%  | 22%  | P | P | P | P | U |
| b4110 | yjcZ | 4327383 | 4328261 | + | 878  | 35 | 0  | 2  | 2  | 2  | 0%   | 6%   | 6%   | 6%   | A | P | P | P | U |
| b4111 | proP | 4328525 | 4330027 | + | 1502 | 60 | 60 | 60 | 60 | 60 | 100% | 100% | 100% | 100% | P | P | P | P |   |
| b4119 | melA | 4339934 | 4341289 | + | 1355 | 54 | 0  | 9  | 38 | 38 | 0%   | 17%  | 70%  | 70%  | A | P | P | P |   |
| b4120 | melB | 4341404 | 4342813 | + | 1409 | 56 | 0  | 4  | 20 | 20 | 0%   | 7%   | 36%  | 36%  | A | P | P | P |   |
| b4126 | yjdI | 4349866 | 4350096 | + | 230  | 9  | 9  | 9  | 9  | 9  | 100% | 100% | 100% | 100% | P | P | P | P | U |
| b4127 | yjdJ | 4350108 | 4350380 | + | 272  | 11 | 11 | 11 | 11 | 11 | 100% | 100% | 100% | 100% | P | P | P | P | U |
| b4128 | yjdK | 4350607 | 4350903 | + | 296  | 12 | 0  | 2  | 2  | 2  | 0%   | 17%  | 17%  | 17%  | A | P | P | P | U |
| b4559 | yjdO | 4350931 | 4351104 | + | 173  | 7  | 0  | 0  | 0  | 0  | 0%   | 0%   | 0%   | 0%   | A | A | A | A | U |
| b4140 | fxsA | 4366687 | 4367163 | + | 476  | 19 | 18 | 19 | 19 | 19 | 95%  | 100% | 100% | 100% | P | P | P | P |   |
| b4142 | groS | 4368711 | 4369004 | + | 293  | 12 | 12 | 12 | 12 | 12 | 100% | 100% | 100% | 100% | P | P | P | P |   |
| b4143 | groL | 4369048 | 4370694 | + | 1646 | 66 | 66 | 66 | 66 | 66 | 100% | 100% | 100% | 100% | P | P | P | P |   |
| b4144 | yjeI | 4370832 | 4371185 | + | 353  | 14 | 14 | 14 | 14 | 14 | 100% | 100% | 100% | 100% | P | P | P | P | U |
| b4147 | efp  | 4373722 | 4374288 | + | 566  | 23 | 23 | 23 | 23 | 23 | 100% | 100% | 100% | 100% | P | P | P | P |   |
| b4410 | ecnA | 4374340 | 4374465 | + | 125  | 5  | 5  | 5  | 5  | 5  | 100% | 100% | 100% | 100% | P | P | P | P |   |
| b4411 | ecnB | 4374576 | 4374722 | + | 146  | 5  | 5  | 5  | 5  | 5  | 100% | 100% | 100% | 100% | P | P | P | P |   |
| b4148 | sugE | 4374898 | 4375215 | + | 317  | 13 | 11 | 12 | 12 | 12 | 85%  | 92%  | 92%  | 92%  | P | P | P | P |   |
| b4155 | poxA | 4380666 | 4381643 | + | 977  | 39 | 28 | 30 | 33 | 33 | 72%  | 77%  | 85%  | 85%  | P | P | P | P | U |
| b4156 | yjeM | 4381862 | 4383364 | + | 1502 | 60 | 3  | 5  | 5  | 5  | 5%   | 8%   | 8%   | 8%   | P | P | P | P | U |
| b4157 | yjeN | 4383416 | 4383730 | + | 314  | 13 | 0  | 1  | 2  | 2  | 0%   | 8%   | 15%  | 15%  | A | P | P | P | U |
| b4158 | yjeO | 4383727 | 4384041 | + | 314  | 12 | 0  | 0  | 0  | 0  | 0%   | 0%   | 0%   | 0%   | A | A | A | A | U |
| b4162 | orn  | 4389627 | 4390172 | + | 545  | 21 | 21 | 21 | 21 | 21 | 100% | 100% | 100% | 100% | P | P | P | P |   |
| b4163 | glyV | 4390383 | 4390458 | + | 75   | 3  | 3  | 3  | 3  | 3  | 100% | 100% | 100% | 100% | P | P | P | P |   |
| b4164 | glyX | 4390495 | 4390570 | + | 75   | 3  | 3  | 3  | 3  | 3  | 100% | 100% | 100% | 100% | P | P | P | P |   |
| b4165 | glyY | 4390606 | 4390681 | + | 75   | 3  | 3  | 3  | 3  | 3  | 100% | 100% | 100% | 100% | P | P | P | P |   |
| b4167 | yjeF | 4392089 | 4393636 | + | 1547 | 62 | 62 | 62 | 62 | 62 | 100% | 100% | 100% | 100% | P | P | P | P | U |
| b4168 | yjeE | 4393608 | 4394069 | + | 461  | 18 | 18 | 18 | 18 | 18 | 100% | 100% | 100% | 100% | P | P | P | P |   |
| b4169 | amiB | 4394088 | 4395425 | + | 1337 | 53 | 53 | 53 | 53 | 53 | 100% | 100% | 100% | 100% | P | P | P | P |   |
| b4170 | mutL | 4395435 | 4397282 | + | 1847 | 74 | 70 | 70 | 70 | 71 | 95%  | 95%  | 95%  | 96%  | P | P | P | P |   |
| b4171 | miaA | 4397275 | 4398225 | + | 950  | 38 | 38 | 38 | 38 | 38 | 100% | 100% | 100% | 100% | P | P | P | P |   |
| b4172 | hfq  | 4398311 | 4398619 | + | 308  | 12 | 12 | 12 | 12 | 12 | 100% | 100% | 100% | 100% | P | P | P | P |   |
| b4173 | hflX | 4398695 | 4399975 | + | 1280 | 51 | 51 | 51 | 51 | 51 | 100% | 100% | 100% | 100% | P | P | P | P | U |
| b4174 | hflK | 4400061 | 4401320 | + | 1259 | 50 | 50 | 50 | 50 | 50 | 100% | 100% | 100% | 100% | P | P | P | P |   |
| b4175 | hflC | 4401323 | 4402327 | + | 1004 | 40 | 40 | 40 | 40 | 40 | 100% | 100% | 100% | 100% | P | P | P | P |   |
| b4176 | yjeT | 4402409 | 4402606 | + | 197  | 7  | 3  | 3  | 3  | 3  | 43%  | 43%  | 43%  | 43%  | P | P | P | P | U |
| b4177 | purA | 4402710 | 4404008 | + | 1298 | 52 | 52 | 52 | 52 | 52 | 100% | 100% | 100% | 100% | P | P | P | P |   |
| b4178 | nsrR | 4404213 | 4404638 | + | 425  | 17 | 17 | 17 | 17 | 17 | 100% | 100% | 100% | 100% | P | P | P | P | U |

|       |      |         |         |   |      |     |     |     |     |     |      |      |      |      |   |   |   |   |   |
|-------|------|---------|---------|---|------|-----|-----|-----|-----|-----|------|------|------|------|---|---|---|---|---|
| b4179 | rnr  | 4404677 | 4407118 | + | 2441 | 98  | 98  | 98  | 98  | 98  | 100% | 100% | 100% | 100% | P | P | P | P |   |
| b4180 | rlmB | 4407298 | 4408029 | + | 731  | 29  | 24  | 24  | 24  | 24  | 83%  | 83%  | 83%  | 83%  | P | P | P | P |   |
| b4181 | yjfI | 4408156 | 4408557 | + | 401  | 16  | 0   | 0   | 0   | 0   | 0%   | 0%   | 0%   | 0%   | A | A | A | A | U |
| b4182 | yjfJ | 4408576 | 4409274 | + | 698  | 28  | 0   | 0   | 0   | 0   | 0%   | 0%   | 0%   | 0%   | A | A | A | A | U |
| b4183 | yjfK | 4409325 | 4409984 | + | 659  | 26  | 0   | 0   | 0   | 0   | 0%   | 0%   | 0%   | 0%   | A | A | A | A | U |
| b4184 | yjfL | 4410002 | 4410400 | + | 398  | 16  | 0   | 0   | 0   | 0   | 0%   | 0%   | 0%   | 0%   | A | A | A | A | U |
| b4185 | yjfM | 4410410 | 4411048 | + | 638  | 26  | 0   | 0   | 0   | 0   | 0%   | 0%   | 0%   | 0%   | A | A | A | A | U |
| b4186 | yjfC | 4411051 | 4412214 | + | 1163 | 46  | 0   | 0   | 0   | 0   | 0%   | 0%   | 0%   | 0%   | A | A | A | A | U |
| b4187 | aidB | 4412298 | 4413923 | + | 1625 | 65  | 57  | 57  | 63  | 65  | 88%  | 88%  | 97%  | 100% | P | P | P | P |   |
| b4190 | yjfP | 4414975 | 4415724 | + | 749  | 30  | 18  | 20  | 20  | 22  | 60%  | 67%  | 67%  | 73%  | P | P | P | P | U |
| b4193 | ulaA | 4418003 | 4419400 | + | 1397 | 56  | 0   | 0   | 0   | 0   | 0%   | 0%   | 0%   | 0%   | A | A | A | A |   |
| b4194 | ulaB | 4419416 | 4419721 | + | 305  | 13  | 0   | 3   | 3   | 3   | 0%   | 23%  | 23%  | 23%  | A | P | P | P |   |
| b4195 | ulaC | 4419731 | 4420195 | + | 464  | 19  | 1   | 1   | 2   | 2   | 5%   | 5%   | 11%  | 11%  | P | P | P | P |   |
| b4196 | ulaD | 4420209 | 4420859 | + | 650  | 26  | 3   | 3   | 5   | 5   | 12%  | 12%  | 19%  | 19%  | P | P | P | P |   |
| b4197 | ulaE | 4420869 | 4421723 | + | 854  | 35  | 4   | 5   | 6   | 6   | 11%  | 14%  | 17%  | 17%  | P | P | P | P |   |
| b4198 | ulaF | 4421723 | 4422409 | + | 686  | 27  | 1   | 1   | 1   | 1   | 4%   | 4%   | 4%   | 4%   | P | P | P | P |   |
| b4200 | rpsF | 4423141 | 4423536 | + | 395  | 16  | 16  | 16  | 16  | 16  | 100% | 100% | 100% | 100% | P | P | P | P |   |
| b4201 | priB | 4423543 | 4423857 | + | 314  | 13  | 13  | 13  | 13  | 13  | 100% | 100% | 100% | 100% | P | P | P | P |   |
| b4202 | rpsR | 4423862 | 4424089 | + | 227  | 9   | 9   | 9   | 9   | 9   | 100% | 100% | 100% | 100% | P | P | P | P |   |
| b4203 | rplI | 4424131 | 4424580 | + | 449  | 18  | 18  | 18  | 18  | 18  | 100% | 100% | 100% | 100% | P | P | P | P |   |
| b4205 | ytfA | 4425717 | 4426118 | + | 401  | 16  | 0   | 0   | 0   | 0   | 0%   | 0%   | 0%   | 0%   | A | A | A | A | U |
| b4207 | fkIB | 4426958 | 4427578 | + | 620  | 25  | 25  | 25  | 25  | 25  | 100% | 100% | 100% | 100% | P | P | P | P |   |
| b4208 | cycA | 4427887 | 4429299 | + | 1412 | 57  | 57  | 57  | 57  | 57  | 100% | 100% | 100% | 100% | P | P | P | P |   |
| b4212 | ytfH | 4432136 | 4432516 | + | 380  | 15  | 4   | 12  | 15  | 15  | 27%  | 80%  | 100% | 100% | P | P | P | P | U |
| b4214 | cysQ | 4434778 | 4435518 | + | 740  | 29  | 26  | 28  | 29  | 29  | 90%  | 97%  | 100% | 100% | P | P | P | P |   |
| b4215 | ytfI | 4435730 | 4436668 | + | 938  | 37  | 0   | 0   | 0   | 0   | 0%   | 0%   | 0%   | 0%   | A | A | A | A | U |
| b4217 | ytfK | 4437610 | 4437816 | + | 206  | 8   | 6   | 6   | 7   | 7   | 75%  | 75%  | 88%  | 88%  | P | P | P | P | U |
| b4220 | ytfM | 4440405 | 4442138 | + | 1733 | 69  | 66  | 66  | 66  | 66  | 96%  | 96%  | 96%  | 96%  | P | P | P | P | U |
| b4221 | ytfN | 4442135 | 4445914 | + | 3779 | 151 | 147 | 147 | 147 | 147 | 97%  | 97%  | 97%  | 97%  | P | P | P | P | U |
| b4222 | ytfP | 4445917 | 4446258 | + | 341  | 14  | 14  | 14  | 14  | 14  | 100% | 100% | 100% | 100% | P | P | P | P | U |
| b4224 | chpS | 4446470 | 4446721 | + | 251  | 10  | 10  | 10  | 10  | 10  | 100% | 100% | 100% | 100% | P | P | P | P |   |
| b4225 | chpB | 4446715 | 4447065 | + | 350  | 14  | 14  | 14  | 14  | 14  | 100% | 100% | 100% | 100% | P | P | P | P |   |
| b4227 | ytfQ | 4447985 | 4448941 | + | 956  | 38  | 15  | 16  | 38  | 38  | 39%  | 42%  | 100% | 100% | P | P | P | P | U |
| b4485 | ytfR | 4449081 | 4450583 | + | 1502 | 60  | 1   | 1   | 57  | 57  | 2%   | 2%   | 95%  | 95%  | P | P | P | P | U |
| b4230 | ytfT | 4450594 | 4451619 | + | 1025 | 41  | 0   | 0   | 37  | 37  | 0%   | 0%   | 90%  | 90%  | A | A | P | P | U |
| b4231 | yjfF | 4451606 | 4452601 | + | 995  | 40  | 0   | 0   | 30  | 30  | 0%   | 0%   | 75%  | 75%  | A | A | P | P | U |
| b4233 | mpl  | 4453808 | 4455181 | + | 1373 | 55  | 55  | 55  | 55  | 55  | 100% | 100% | 100% | 100% | P | P | P | P |   |
| b4235 | pmbA | 4455982 | 4457334 | + | 1352 | 54  | 54  | 54  | 54  | 54  | 100% | 100% | 100% | 100% | P | P | P | P | U |
| b4236 | cybC | 4457513 | 4457878 | + | 365  | 15  | 12  | 12  | 14  | 14  | 80%  | 80%  | 93%  | 93%  | P | P | P | P | U |
| b4242 | mgtA | 4465648 | 4468344 | + | 2696 | 108 | 100 | 103 | 103 | 105 | 93%  | 95%  | 95%  | 97%  | P | P | P | P |   |
| b4251 | yjgJ | 4472147 | 4472740 | + | 593  | 24  | 19  | 22  | 22  | 22  | 79%  | 92%  | 92%  | 92%  | P | P | P | P | U |
| b4252 | yjgK | 4472885 | 4473337 | + | 452  | 19  | 16  | 17  | 17  | 17  | 84%  | 89%  | 89%  | 89%  | P | P | P | P | U |
| b4253 | yjgL | 4473460 | 4475274 | + | 1814 | 73  | 0   | 1   | 3   | 3   | 0%   | 1%   | 4%   | 4%   | A | P | P | P | U |
| b4255 | rraB | 4476496 | 4476912 | + | 416  | 17  | 17  | 17  | 17  | 17  | 100% | 100% | 100% | 100% | P | P | P | P | U |
| b4257 | yjgN | 4477753 | 4478949 | + | 1196 | 48  | 0   | 0   | 0   | 0   | 0%   | 0%   | 0%   | 0%   | A | A | A | A | U |
| b4261 | yjgP | 4484241 | 4485341 | + | 1100 | 44  | 44  | 44  | 44  | 44  | 100% | 100% | 100% | 100% | P | P | P | P | U |

|       |      |         |         |   |      |     |    |    |    |    |      |      |      |      |   |   |   |   |   |
|-------|------|---------|---------|---|------|-----|----|----|----|----|------|------|------|------|---|---|---|---|---|
| b4262 | yjqQ | 4485341 | 4486423 | + | 1082 | 43  | 40 | 40 | 40 | 40 | 93%  | 93%  | 93%  | 93%  | P | P | P | P | U |
| b4268 | idnK | 4492646 | 4493209 | + | 563  | 22  | 0  | 4  | 4  | 4  | 0%   | 18%  | 18%  | 18%  | A | P | P | P |   |
| b4270 | leuX | 4494428 | 4494512 | + | 84   | 3   | 3  | 3  | 3  | 3  | 100% | 100% | 100% | 100% | P | P | P | P |   |
| b4271 | intB | 4494698 | 4495963 | + | 1265 | 51  | 30 | 31 | 31 | 36 | 59%  | 61%  | 61%  | 71%  | P | P | P | P | U |
| b4272 | insC | 4496295 | 4496660 | + | 365  | 14  | 14 | 14 | 14 | 14 | 100% | 100% | 100% | 100% | P | P | P | P |   |
| b4273 | insD | 4496618 | 4497523 | + | 905  | 36  | 36 | 36 | 36 | 36 | 100% | 100% | 100% | 100% | P | P | P | P |   |
| b4277 | yjgZ | 4499283 | 4499612 | + | 329  | 13  | 0  | 0  | 0  | 0  | 0%   | 0%   | 0%   | 0%   | A | A | A | A | U |
| b4279 | yjhB | 4502081 | 4503298 | + | 1217 | 49  | 0  | 0  | 0  | 3  | 0%   | 0%   | 0%   | 6%   | A | A | A | P | U |
| b4280 | yjhC | 4503310 | 4504428 | + | 1118 | 45  | 0  | 0  | 0  | 19 | 0%   | 0%   | 0%   | 42%  | A | A | A | P | U |
| b4655 | ythA | 4504471 | 4504596 | + | 125  | 5   | 0  | 0  | 0  | 0  | 0%   | 0%   | 0%   | 0%   | A | A | A | A |   |
| b4282 | yjhE | 4504884 | 4505132 | + | 248  | 10  | 2  | 2  | 3  | 3  | 20%  | 20%  | 30%  | 30%  | P | P | P | P | U |
| b4623 | insO | 4505220 | 4505474 | + | 254  | 10  | 4  | 6  | 6  | 6  | 40%  | 60%  | 60%  | 60%  | P | P | P | P | U |
| b4623 | insO | 4507032 | 4507816 | + | 784  | 32  | 0  | 0  | 3  | 4  | 0%   | 0%   | 9%   | 13%  | A | A | P | P | U |
| b4286 | yjhV | 4507827 | 4508156 | + | 329  | 13  | 0  | 0  | 1  | 1  | 0%   | 0%   | 8%   | 8%   | A | A | P | P | U |
| b4294 | insA | 4516550 | 4516825 | + | 275  | 11  | 9  | 9  | 9  | 9  | 82%  | 82%  | 82%  | 82%  | P | P | P | P |   |
| b4576 | insB | 4516744 | 4517247 | + | 503  | 21  | 5  | 5  | 6  | 7  | 24%  | 24%  | 29%  | 33%  | P | P | P | P | U |
| b4624 | ryjB | 4526000 | 4526089 | + | 89   | 3   | 2  | 2  | 2  | 2  | 67%  | 67%  | 67%  | 67%  | P | P | P | P | U |
| b4308 | yjhR | 4532814 | 4534054 | + | 1240 | 50  | 0  | 3  | 3  | 3  | 0%   | 6%   | 6%   | 6%   | A | P | P | P | U |
| b4312 | fimB | 4538980 | 4539582 | + | 602  | 24  | 22 | 22 | 22 | 22 | 92%  | 92%  | 92%  | 92%  | P | P | P | P |   |
| b4313 | fimE | 4540060 | 4540656 | + | 596  | 24  | 5  | 10 | 10 | 10 | 21%  | 42%  | 42%  | 42%  | P | P | P | P |   |
| b4314 | fimA | 4541138 | 4541686 | + | 548  | 22  | 22 | 22 | 22 | 22 | 100% | 100% | 100% | 100% | P | P | P | P |   |
| b4315 | fimI | 4541751 | 4542290 | + | 539  | 21  | 21 | 21 | 21 | 21 | 100% | 100% | 100% | 100% | P | P | P | P |   |
| b4316 | fimC | 4542327 | 4543052 | + | 725  | 29  | 27 | 27 | 27 | 27 | 93%  | 93%  | 93%  | 93%  | P | P | P | P |   |
| b4317 | fimD | 4543119 | 4545755 | + | 2636 | 106 | 34 | 35 | 36 | 36 | 32%  | 33%  | 34%  | 34%  | P | P | P | P |   |
| b4318 | fimF | 4545765 | 4546295 | + | 530  | 21  | 12 | 12 | 12 | 12 | 57%  | 57%  | 57%  | 57%  | P | P | P | P |   |
| b4319 | fimG | 4546308 | 4546811 | + | 503  | 20  | 7  | 7  | 7  | 7  | 35%  | 35%  | 35%  | 35%  | P | P | P | P |   |
| b4320 | fimH | 4546831 | 4547733 | + | 902  | 36  | 20 | 20 | 22 | 22 | 56%  | 56%  | 61%  | 61%  | P | P | P | P |   |
| b4322 | uxuA | 4549659 | 4550843 | + | 1184 | 47  | 25 | 45 | 45 | 45 | 53%  | 96%  | 96%  | 96%  | P | P | P | P |   |
| b4323 | uxuB | 4550924 | 4552384 | + | 1460 | 58  | 12 | 51 | 51 | 51 | 21%  | 88%  | 88%  | 88%  | P | P | P | P |   |
| b4324 | uxuR | 4552599 | 4553372 | + | 773  | 31  | 25 | 26 | 26 | 26 | 81%  | 84%  | 84%  | 84%  | P | P | P | P |   |
| b4326 | yjiD | 4555016 | 4555408 | + | 392  | 16  | 6  | 6  | 6  | 11 | 38%  | 38%  | 38%  | 69%  | P | P | P | P |   |
| b4331 | kptA | 4558953 | 4559507 | + | 554  | 22  | 5  | 5  | 5  | 6  | 23%  | 23%  | 23%  | 27%  | P | P | P | P |   |
| b4339 | yjiP | 4567021 | 4567941 | + | 920  | 37  | 11 | 14 | 14 | 14 | 30%  | 38%  | 38%  | 38%  | P | P | P | P | U |
| b4341 | yjiS | 4569774 | 4569938 | + | 164  | 7   | 0  | 0  | 1  | 1  | 0%   | 0%   | 14%  | 14%  | A | A | P | P | U |
| b4342 | yjiT | 4570437 | 4571939 | + | 1502 | 60  | 54 | 54 | 54 | 54 | 90%  | 90%  | 90%  | 90%  | P | P | P | P | U |
| b4486 | yjiV | 4571942 | 4574878 | + | 2936 | 118 | 44 | 60 | 61 | 62 | 37%  | 51%  | 52%  | 53%  | P | P | P | P | U |
| b4625 | symR | 4577858 | 4577934 | + | 76   | 3   | 2  | 2  | 2  | 2  | 67%  | 67%  | 67%  | 67%  | P | P | P | P |   |
| b4351 | mrr  | 4584972 | 4585886 | + | 914  | 37  | 36 | 36 | 36 | 36 | 97%  | 97%  | 97%  | 97%  | P | P | P | P |   |
| b4355 | tsr  | 4589680 | 4591335 | + | 1655 | 66  | 6  | 20 | 27 | 27 | 9%   | 30%  | 41%  | 41%  | P | P | P | P |   |
| b4358 | yjjN | 4594022 | 4595035 | + | 1013 | 41  | 0  | 4  | 7  | 7  | 0%   | 10%  | 17%  | 17%  | A | P | P | P | U |
| b4365 | yjjQ | 4601500 | 4602225 | + | 725  | 29  | 0  | 0  | 0  | 0  | 0%   | 0%   | 0%   | 0%   | A | A | A | A | U |
| b4366 | bglJ | 4602333 | 4602860 | + | 527  | 21  | 0  | 0  | 0  | 0  | 0%   | 0%   | 0%   | 0%   | A | A | A | A |   |
| b4567 | yjjZ | 4603827 | 4604063 | + | 236  | 9   | 0  | 0  | 9  | 9  | 0%   | 0%   | 100% | 100% | A | A | P | P | U |
| b4372 | holD | 4605826 | 4606239 | + | 413  | 16  | 16 | 16 | 16 | 16 | 100% | 100% | 100% | 100% | P | P | P | P |   |
| b4373 | rimI | 4606208 | 4606654 | + | 446  | 18  | 18 | 18 | 18 | 18 | 100% | 100% | 100% | 100% | P | P | P | P |   |
| b4374 | yjjG | 4606669 | 4607346 | + | 677  | 27  | 26 | 26 | 26 | 26 | 96%  | 96%  | 96%  | 96%  | P | P | P | P |   |



|       |      |         |         |   |      |     |     |     |     |     |      |      |      |      |   |   |   |   |   |
|-------|------|---------|---------|---|------|-----|-----|-----|-----|-----|------|------|------|------|---|---|---|---|---|
| b4375 | prfC | 4607437 | 4609026 | + | 1589 | 64  | 63  | 63  | 63  | 63  | 98%  | 98%  | 98%  | 98%  | P | P | P | P |   |
| b4376 | osmY | 4609419 | 4610024 | + | 605  | 25  | 25  | 25  | 25  | 25  | 100% | 100% | 100% | 100% | P | P | P | P |   |
| b4568 | ytjA | 4610151 | 4610312 | + | 161  | 6   | 6   | 6   | 6   | 6   | 100% | 100% | 100% | 100% | P | P | P | P | U |
| b4377 | yjjU | 4610434 | 4611507 | + | 1073 | 43  | 43  | 43  | 43  | 43  | 100% | 100% | 100% | 100% | P | P | P | P | U |
| b4378 | yjjV | 4611504 | 4612283 | + | 779  | 31  | 23  | 23  | 23  | 23  | 74%  | 74%  | 74%  | 74%  | P | P | P | P | U |
| b4381 | deoC | 4615346 | 4616125 | + | 779  | 32  | 31  | 31  | 32  | 32  | 97%  | 97%  | 100% | 100% | P | P | P | P |   |
| b4382 | deoA | 4616252 | 4617574 | + | 1322 | 53  | 50  | 50  | 50  | 51  | 94%  | 94%  | 94%  | 96%  | P | P | P | P |   |
| b4383 | deoB | 4617626 | 4618849 | + | 1223 | 49  | 49  | 49  | 49  | 49  | 100% | 100% | 100% | 100% | P | P | P | P |   |
| b4384 | deoD | 4618906 | 4619625 | + | 719  | 29  | 27  | 27  | 27  | 28  | 93%  | 93%  | 93%  | 97%  | P | P | P | P |   |
| b4385 | yjjJ | 4619792 | 4621123 | + | 1331 | 53  | 38  | 42  | 42  | 42  | 72%  | 79%  | 79%  | 79%  | P | P | P | P | U |
| b4388 | serB | 4622918 | 4623886 | + | 968  | 39  | 39  | 39  | 39  | 39  | 100% | 100% | 100% | 100% | P | P | P | P |   |
| b4389 | radA | 4623935 | 4625317 | + | 1382 | 55  | 55  | 55  | 55  | 55  | 100% | 100% | 100% | 100% | P | P | P | P | U |
| b4390 | nadR | 4625338 | 4626570 | + | 1232 | 49  | 48  | 48  | 49  | 49  | 98%  | 98%  | 100% | 100% | P | P | P | P |   |
| b4392 | slt  | 4628756 | 4630693 | + | 1937 | 77  | 76  | 76  | 76  | 77  | 99%  | 99%  | 99%  | 100% | P | P | P | P |   |
| b4393 | trpR | 4630783 | 4631109 | + | 326  | 13  | 13  | 13  | 13  | 13  | 100% | 100% | 100% | 100% | P | P | P | P |   |
| b4395 | ytjC | 4631820 | 4632467 | + | 647  | 26  | 26  | 26  | 26  | 26  | 100% | 100% | 100% | 100% | P | P | P | P |   |
| b4397 | creA | 4633544 | 4634017 | + | 473  | 19  | 19  | 19  | 19  | 19  | 100% | 100% | 100% | 100% | P | P | P | P | U |
| b4398 | creB | 4634030 | 4634719 | + | 689  | 27  | 26  | 26  | 26  | 26  | 96%  | 96%  | 96%  | 96%  | P | P | P | P |   |
| b4399 | creC | 4634719 | 4636143 | + | 1424 | 57  | 29  | 30  | 30  | 30  | 51%  | 53%  | 53%  | 53%  | P | P | P | P |   |
| b4400 | creD | 4636201 | 4637553 | + | 1352 | 54  | 5   | 8   | 8   | 8   | 9%   | 15%  | 15%  | 15%  | P | P | P | P |   |
| b4402 | yjjY | 4638425 | 4638565 | + | 140  | 5   | 0   | 1   | 1   | 2   | 0%   | 20%  | 20%  | 40%  | A | P | P | P | U |
| b4403 | yjtD | 4638965 | 4639651 | + | 686  | 28  | 25  | 25  | 25  | 25  | 89%  | 89%  | 89%  | 89%  | P | P | P | P | U |
| b0006 | yaaA | 5683    | 6459    | - | 776  | 31  | 28  | 28  | 28  | 28  | 90%  | 90%  | 90%  | 90%  | P | P | P | P | U |
| b0007 | yaaJ | 6529    | 7959    | - | 1430 | 57  | 0   | 7   | 9   | 22  | 0%   | 12%  | 16%  | 39%  | A | P | P | P | U |
| b0010 | yaaH | 9928    | 10494   | - | 566  | 22  | 7   | 10  | 10  | 10  | 32%  | 45%  | 45%  | 45%  | P | P | P | P | U |
| b0011 | yaaW | 10643   | 11356   | - | 713  | 29  | 0   | 0   | 12  | 12  | 0%   | 0%   | 41%  | 41%  | A | A | P | P | U |
| b0013 | yaaI | 11382   | 11786   | - | 404  | 16  | 0   | 0   | 0   | 0   | 0%   | 0%   | 0%   | 0%   | A | A | A | A | U |
| b0018 | mokC | 16751   | 16960   | - | 209  | 9   | 1   | 1   | 7   | 7   | 11%  | 11%  | 78%  | 78%  | P | P | P | P |   |
| b4412 | hokC | 16751   | 16903   | - | 152  | 7   | 1   | 1   | 6   | 6   | 14%  | 14%  | 86%  | 86%  | P | P | P | P |   |
| b0021 | insB | 19811   | 20314   | - | 503  | 20  | 15  | 16  | 16  | 16  | 75%  | 80%  | 80%  | 80%  | P | P | P | P |   |
| b0022 | insA | 20233   | 20508   | - | 275  | 11  | 11  | 11  | 11  | 11  | 100% | 100% | 100% | 100% | P | P | P | P |   |
| b0023 | rpsT | 20815   | 21078   | - | 263  | 11  | 11  | 11  | 11  | 11  | 100% | 100% | 100% | 100% | P | P | P | P |   |
| b0035 | caiE | 34781   | 35371   | - | 590  | 24  | 1   | 4   | 4   | 4   | 4%   | 17%  | 17%  | 17%  | P | P | P | P | U |
| b0036 | caiD | 35377   | 36270   | - | 893  | 36  | 1   | 1   | 3   | 3   | 3%   | 3%   | 8%   | 8%   | P | P | P | P |   |
| b0037 | caiC | 36271   | 37839   | - | 1568 | 63  | 4   | 4   | 5   | 5   | 6%   | 6%   | 8%   | 8%   | P | P | P | P | U |
| b0038 | caiB | 37898   | 39115   | - | 1217 | 49  | 0   | 0   | 12  | 12  | 0%   | 0%   | 24%  | 24%  | A | A | P | P |   |
| b0039 | caiA | 39244   | 40386   | - | 1142 | 46  | 12  | 12  | 18  | 18  | 26%  | 26%  | 39%  | 39%  | P | P | P | P |   |
| b0040 | caiT | 40417   | 41931   | - | 1514 | 60  | 0   | 0   | 0   | 0   | 0%   | 0%   | 0%   | 0%   | A | A | A | A | U |
| b0049 | apaH | 50380   | 51222   | - | 842  | 34  | 34  | 34  | 34  | 34  | 100% | 100% | 100% | 100% | P | P | P | P |   |
| b0050 | apaG | 51229   | 51606   | - | 377  | 15  | 15  | 15  | 15  | 15  | 100% | 100% | 100% | 100% | P | P | P | P |   |
| b0051 | ksgA | 51609   | 52430   | - | 821  | 33  | 33  | 33  | 33  | 33  | 100% | 100% | 100% | 100% | P | P | P | P |   |
| b0052 | pdxA | 52427   | 53416   | - | 989  | 40  | 40  | 40  | 40  | 40  | 100% | 100% | 100% | 100% | P | P | P | P |   |
| b0053 | surA | 53416   | 54702   | - | 1286 | 51  | 51  | 51  | 51  | 51  | 100% | 100% | 100% | 100% | P | P | P | P |   |
| b0054 | imp  | 54755   | 57109   | - | 2354 | 95  | 95  | 95  | 95  | 95  | 100% | 100% | 100% | 100% | P | P | P | P |   |
| b0058 | rluA | 59687   | 60346   | - | 659  | 26  | 23  | 23  | 25  | 25  | 88%  | 88%  | 96%  | 96%  | P | P | P | P |   |
| b0059 | hepA | 60358   | 63264   | - | 2906 | 117 | 115 | 117 | 117 | 117 | 98%  | 100% | 100% | 100% | P | P | P | P |   |

|         |      |        |        |   |      |     |    |    |    |    |      |      |      |      |   |   |   |   |   |
|---------|------|--------|--------|---|------|-----|----|----|----|----|------|------|------|------|---|---|---|---|---|
| b0060   | polB | 63429  | 65780  | - | 2351 | 94  | 46 | 50 | 51 | 54 | 49%  | 53%  | 54%  | 57%  | P | P | P | P |   |
| b0061   | araD | 65855  | 66550  | - | 695  | 28  | 0  | 0  | 1  | 1  | 0%   | 0%   | 4%   | 4%   | A | A | P | P |   |
| b0062   | araA | 66835  | 68337  | - | 1502 | 60  | 0  | 0  | 27 | 27 | 0%   | 0%   | 45%  | 45%  | A | A | P | P |   |
| b0063   | araB | 68348  | 70048  | - | 1700 | 68  | 0  | 0  | 33 | 33 | 0%   | 0%   | 49%  | 49%  | A | A | P | P |   |
| b0066   | thiQ | 72229  | 72927  | - | 698  | 28  | 25 | 25 | 25 | 25 | 89%  | 89%  | 89%  | 89%  | P | P | P | P |   |
| b0067   | thiP | 72911  | 74521  | - | 1610 | 64  | 61 | 61 | 61 | 61 | 95%  | 95%  | 95%  | 95%  | P | P | P | P |   |
| b0068   | tbpA | 74497  | 75480  | - | 983  | 39  | 38 | 38 | 38 | 38 | 97%  | 97%  | 97%  | 97%  | P | P | P | P |   |
| GO-9381 | sroA | 75516  | 75608  | - | 92   | 3   | 3  | 3  | 3  | 3  | 100% | 100% | 100% | 100% | P | P | P | P |   |
| b0069   | sgrR | 75644  | 77299  | - | 1655 | 66  | 48 | 48 | 48 | 48 | 73%  | 73%  | 73%  | 73%  | P | P | P | P |   |
| b0071   | leuD | 78848  | 79453  | - | 605  | 24  | 24 | 24 | 24 | 24 | 100% | 100% | 100% | 100% | P | P | P | P |   |
| b0072   | leuC | 79464  | 80864  | - | 1400 | 56  | 56 | 56 | 56 | 56 | 100% | 100% | 100% | 100% | P | P | P | P |   |
| b0073   | leuB | 80867  | 81958  | - | 1091 | 43  | 43 | 43 | 43 | 43 | 100% | 100% | 100% | 100% | P | P | P | P |   |
| b0074   | leuA | 81958  | 83529  | - | 1571 | 63  | 63 | 63 | 63 | 63 | 100% | 100% | 100% | 100% | P | P | P | P |   |
| b0075   | leuL | 83622  | 83708  | - | 86   | 3   | 3  | 3  | 3  | 3  | 100% | 100% | 100% | 100% | P | P | P | P |   |
| b0101   | yacG | 111649 | 111846 | - | 197  | 8   | 8  | 8  | 8  | 8  | 100% | 100% | 100% | 100% | P | P | P | P | U |
| b0102   | yacF | 111856 | 112599 | - | 743  | 30  | 30 | 30 | 30 | 30 | 100% | 100% | 100% | 100% | P | P | P | P | U |
| b0103   | coaE | 112599 | 113219 | - | 620  | 25  | 24 | 24 | 24 | 24 | 96%  | 96%  | 96%  | 96%  | P | P | P | P |   |
| b0106   | hofC | 114522 | 115724 | - | 1202 | 48  | 0  | 0  | 4  | 4  | 0%   | 0%   | 8%   | 8%   | A | A | P | P |   |
| b0107   | hofB | 115714 | 117099 | - | 1385 | 55  | 4  | 5  | 5  | 5  | 7%   | 9%   | 9%   | 9%   | P | P | P | P | U |
| b0108   | ppdD | 117109 | 117549 | - | 440  | 18  | 0  | 0  | 0  | 0  | 0%   | 0%   | 0%   | 0%   | A | A | A | A | U |
| b0109   | nadC | 117752 | 118645 | - | 893  | 36  | 34 | 34 | 34 | 34 | 94%  | 94%  | 94%  | 94%  | P | P | P | P |   |
| b0112   | aroP | 120178 | 121551 | - | 1373 | 55  | 55 | 55 | 55 | 55 | 100% | 100% | 100% | 100% | P | P | P | P |   |
| GO-8894 | tp2  | 122697 | 122857 | - | 160  | 6   | 0  | 0  | 0  | 0  | 0%   | 0%   | 0%   | 0%   | A | A | A | A |   |
| b0117   | yacH | 129407 | 131260 | - | 1853 | 74  | 0  | 0  | 5  | 5  | 0%   | 0%   | 7%   | 7%   | A | A | P | P | U |
| b0120   | speD | 134788 | 135582 | - | 794  | 32  | 32 | 32 | 32 | 32 | 100% | 100% | 100% | 100% | P | P | P | P |   |
| b0121   | speE | 135598 | 136464 | - | 866  | 34  | 34 | 34 | 34 | 34 | 100% | 100% | 100% | 100% | P | P | P | P |   |
| b0122   | yacC | 136570 | 136917 | - | 347  | 14  | 13 | 13 | 13 | 13 | 93%  | 93%  | 93%  | 93%  | P | P | P | P | U |
| b0124   | gcd  | 138835 | 141225 | - | 2390 | 96  | 94 | 94 | 95 | 95 | 98%  | 98%  | 99%  | 99%  | P | P | P | P |   |
| b0126   | can  | 142008 | 142670 | - | 662  | 26  | 26 | 26 | 26 | 26 | 100% | 100% | 100% | 100% | P | P | P | P |   |
| b0131   | panD | 146314 | 146694 | - | 380  | 15  | 15 | 15 | 15 | 15 | 100% | 100% | 100% | 100% | P | P | P | P |   |
| b0133   | panC | 147944 | 148795 | - | 851  | 34  | 33 | 33 | 33 | 33 | 97%  | 97%  | 97%  | 97%  | P | P | P | P |   |
| b0134   | panB | 148807 | 149601 | - | 794  | 32  | 32 | 32 | 32 | 32 | 100% | 100% | 100% | 100% | P | P | P | P |   |
| b0135   | yadC | 149715 | 150953 | - | 1238 | 50  | 0  | 1  | 2  | 2  | 0%   | 2%   | 4%   | 4%   | A | P | P | P | U |
| b0136   | yadK | 151003 | 151599 | - | 596  | 23  | 0  | 0  | 0  | 0  | 0%   | 0%   | 0%   | 0%   | A | A | A | A | U |
| b0137   | yadL | 151626 | 152231 | - | 605  | 25  | 0  | 4  | 4  | 4  | 0%   | 16%  | 16%  | 16%  | A | P | P | P | U |
| b0138   | yadM | 152243 | 152812 | - | 569  | 23  | 0  | 1  | 1  | 1  | 0%   | 4%   | 4%   | 4%   | A | P | P | P | U |
| b0139   | htrE | 152829 | 155426 | - | 2597 | 104 | 0  | 1  | 1  | 1  | 0%   | 1%   | 1%   | 1%   | A | P | P | P | U |
| b0140   | ecpD | 155461 | 156201 | - | 740  | 30  | 0  | 0  | 0  | 0  | 0%   | 0%   | 0%   | 0%   | A | A | A | A | U |
| b0141   | yadN | 156299 | 156883 | - | 584  | 24  | 0  | 0  | 0  | 0  | 0%   | 0%   | 0%   | 0%   | A | A | A | A | U |
| b0142   | folK | 157253 | 157732 | - | 479  | 19  | 16 | 16 | 16 | 16 | 84%  | 84%  | 84%  | 84%  | P | P | P | P |   |
| b0143   | pcnB | 157729 | 159126 | - | 1397 | 56  | 56 | 56 | 56 | 56 | 100% | 100% | 100% | 100% | P | P | P | P |   |
| b0144   | yadB | 159186 | 160082 | - | 896  | 36  | 24 | 24 | 24 | 24 | 67%  | 67%  | 67%  | 67%  | P | P | P | P |   |
| b0145   | dksA | 160149 | 160604 | - | 455  | 19  | 19 | 19 | 19 | 19 | 100% | 100% | 100% | 100% | P | P | P | P |   |
| b0146   | sfsA | 160782 | 161486 | - | 704  | 28  | 26 | 27 | 27 | 27 | 93%  | 96%  | 96%  | 96%  | P | P | P | P | U |
| b0147   | ligT | 161501 | 162031 | - | 530  | 22  | 19 | 19 | 19 | 19 | 86%  | 86%  | 86%  | 86%  | P | P | P | P |   |
| b0154   | hemL | 173602 | 174882 | - | 1280 | 51  | 51 | 51 | 51 | 51 | 100% | 100% | 100% | 100% | P | P | P | P |   |

|       |      |        |        |   |      |     |     |     |     |     |      |      |      |      |   |   |   |   |   |
|-------|------|--------|--------|---|------|-----|-----|-----|-----|-----|------|------|------|------|---|---|---|---|---|
| b0157 | yadS | 177001 | 177624 | - | 623  | 25  | 17  | 17  | 17  | 17  | 68%  | 68%  | 68%  | 68%  | P | P | P | P | U |
| b0158 | btuF | 177662 | 178462 | - | 800  | 32  | 25  | 25  | 25  | 25  | 78%  | 78%  | 78%  | 78%  | P | P | P | P |   |
| b0159 | mtn  | 178455 | 179153 | - | 698  | 28  | 28  | 28  | 28  | 28  | 100% | 100% | 100% | 100% | P | P | P | P |   |
| b0163 | yaeH | 183709 | 184095 | - | 386  | 15  | 15  | 15  | 15  | 15  | 100% | 100% | 100% | 100% | P | P | P | P | U |
| b0164 | yaeI | 184257 | 185069 | - | 812  | 33  | 5   | 5   | 5   | 5   | 15%  | 15%  | 15%  | 15%  | P | P | P | P | U |
| b0166 | dapD | 185123 | 185947 | - | 824  | 33  | 33  | 33  | 33  | 33  | 100% | 100% | 100% | 100% | P | P | P | P |   |
| b0167 | glnD | 185978 | 188650 | - | 2672 | 107 | 105 | 105 | 105 | 106 | 98%  | 98%  | 98%  | 99%  | P | P | P | P |   |
| b0168 | map  | 188712 | 189506 | - | 794  | 31  | 31  | 31  | 31  | 31  | 100% | 100% | 100% | 100% | P | P | P | P |   |
| b0189 | rof  | 213678 | 213932 | - | 254  | 11  | 11  | 11  | 11  | 11  | 100% | 100% | 100% | 100% | P | P | P | P |   |
| b4406 | yaeP | 213925 | 214125 | - | 200  | 8   | 8   | 8   | 8   | 8   | 100% | 100% | 100% | 100% | P | P | P | P | U |
| b0193 | yaeF | 216179 | 217003 | - | 824  | 33  | 0   | 0   | 0   | 0   | 0%   | 0%   | 0%   | 0%   | A | A | A | A | U |
| b0194 | proS | 217057 | 218775 | - | 1718 | 69  | 65  | 65  | 65  | 65  | 94%  | 94%  | 94%  | 94%  | P | P | P | P |   |
| b0195 | yaeB | 218887 | 219594 | - | 707  | 28  | 24  | 24  | 24  | 24  | 86%  | 86%  | 86%  | 86%  | P | P | P | P | U |
| b0196 | rscF | 219591 | 219995 | - | 404  | 16  | 16  | 16  | 16  | 16  | 100% | 100% | 100% | 100% | P | P | P | P | U |
| b0197 | metQ | 220113 | 220928 | - | 815  | 32  | 32  | 32  | 32  | 32  | 100% | 100% | 100% | 100% | P | P | P | P |   |
| b0198 | metI | 220968 | 221621 | - | 653  | 26  | 26  | 26  | 26  | 26  | 100% | 100% | 100% | 100% | P | P | P | P |   |
| b0199 | metN | 221614 | 222645 | - | 1031 | 41  | 41  | 41  | 41  | 41  | 100% | 100% | 100% | 100% | P | P | P | P |   |
| b0208 | yafC | 229967 | 230881 | - | 914  | 36  | 29  | 30  | 30  | 30  | 81%  | 83%  | 83%  | 83%  | P | P | P | P | U |
| b0211 | mltD | 232597 | 233955 | - | 1358 | 54  | 54  | 54  | 54  | 54  | 100% | 100% | 100% | 100% | P | P | P | P | U |
| b0212 | gloB | 234027 | 234782 | - | 755  | 30  | 24  | 26  | 26  | 27  | 80%  | 87%  | 87%  | 90%  | P | P | P | P | U |
| b0214 | rnhA | 235535 | 236002 | - | 467  | 19  | 17  | 17  | 17  | 17  | 89%  | 89%  | 89%  | 89%  | P | P | P | P |   |
| b4586 | ykfM | 238257 | 238736 | - | 479  | 19  | 0   | 0   | 0   | 0   | 0%   | 0%   | 0%   | 0%   | A | A | A | A | U |
| b0218 | yafU | 238746 | 239102 | - | 356  | 14  | 0   | 0   | 0   | 0   | 0%   | 0%   | 0%   | 0%   | A | A | A | A | U |
| b0219 | yafV | 239419 | 240189 | - | 770  | 31  | 20  | 23  | 23  | 26  | 65%  | 74%  | 74%  | 84%  | P | P | P | P | U |
| b0221 | fadE | 240859 | 243303 | - | 2444 | 98  | 68  | 68  | 98  | 98  | 69%  | 69%  | 100% | 100% | P | P | P | P |   |
| b0224 | yafK | 245065 | 245805 | - | 740  | 29  | 29  | 29  | 29  | 29  | 100% | 100% | 100% | 100% | P | P | P | P | U |
| b0225 | yafQ | 245961 | 246239 | - | 278  | 12  | 11  | 11  | 12  | 12  | 92%  | 92%  | 100% | 100% | P | P | P | P | U |
| b0226 | dinJ | 246242 | 246502 | - | 260  | 10  | 10  | 10  | 10  | 10  | 100% | 100% | 100% | 100% | P | P | P | P | U |
| b0229 | lfhA | 248358 | 250070 | - | 1712 | 69  | 0   | 3   | 18  | 18  | 0%   | 4%   | 26%  | 26%  | A | P | P | P | U |
| b0237 | pepD | 254259 | 255716 | - | 1457 | 59  | 59  | 59  | 59  | 59  | 100% | 100% | 100% | 100% | P | P | P | P |   |
| b0241 | phoE | 258269 | 259324 | - | 1055 | 42  | 0   | 1   | 1   | 1   | 0%   | 2%   | 2%   | 2%   | A | P | P | P |   |
| b4626 | ykfN | 262374 | 262436 | - | 62   | 2   | 0   | 0   | 0   | 0   | 0%   | 0%   | 0%   | 0%   | A | A | A | A | U |
| b0245 | ykfI | 262552 | 262893 | - | 341  | 14  | 0   | 0   | 0   | 0   | 0%   | 0%   | 0%   | 0%   | A | A | A | A |   |
| b0246 | yafW | 262914 | 263231 | - | 317  | 13  | 0   | 0   | 1   | 1   | 0%   | 0%   | 8%   | 8%   | A | A | P | P |   |
| b4504 | ykfH | 263250 | 263471 | - | 221  | 9   | 0   | 0   | 0   | 0   | 0%   | 0%   | 0%   | 0%   | A | A | A | A | U |
| b0247 | ykfG | 263480 | 263956 | - | 476  | 19  | 0   | 0   | 1   | 1   | 0%   | 0%   | 5%   | 5%   | A | A | P | P | U |
| b0248 | yafX | 263972 | 264430 | - | 458  | 18  | 0   | 0   | 0   | 0   | 0%   | 0%   | 0%   | 0%   | A | A | A | A | U |
| b0249 | ykfF | 264528 | 264767 | - | 239  | 10  | 0   | 0   | 0   | 0   | 0%   | 0%   | 0%   | 0%   | A | A | A | A | U |
| b0250 | ykfB | 264844 | 265311 | - | 467  | 18  | 11  | 12  | 17  | 17  | 61%  | 67%  | 94%  | 94%  | P | P | P | P | U |
| b0251 | yafY | 265334 | 265777 | - | 443  | 18  | 3   | 3   | 3   | 3   | 17%  | 17%  | 17%  | 17%  | P | P | P | P | U |
| b4627 | ykfL | 265777 | 265998 | - | 221  | 9   | 0   | 0   | 0   | 0   | 0%   | 0%   | 0%   | 0%   | A | A | A | A | U |
| b4628 | ykfK | 266000 | 266191 | - | 191  | 8   | 0   | 0   | 0   | 0   | 0%   | 0%   | 0%   | 0%   | A | A | A | A | U |
| b0252 | yafZ | 266408 | 267229 | - | 821  | 33  | 0   | 0   | 0   | 0   | 0%   | 0%   | 0%   | 0%   | A | A | A | A | U |
| b0253 | ykfA | 267321 | 268184 | - | 863  | 34  | 6   | 9   | 9   | 10  | 18%  | 26%  | 26%  | 29%  | P | P | P | P | U |
| b0254 | perR | 268513 | 269406 | - | 893  | 36  | 0   | 0   | 0   | 0   | 0%   | 0%   | 0%   | 0%   | A | A | A | A | U |
| b0259 | insH | 273325 | 274341 | - | 1016 | 41  | 41  | 41  | 41  | 41  | 100% | 100% | 100% | 100% | P | P | P | P |   |

|       |      |        |        |   |      |     |    |    |    |    |      |      |      |      |   |   |   |   |   |
|-------|------|--------|--------|---|------|-----|----|----|----|----|------|------|------|------|---|---|---|---|---|
| b0262 | afuC | 276980 | 278026 | - | 1046 | 42  | 0  | 4  | 4  | 4  | 0%   | 10%  | 10%  | 10%  | A | P | P | P | U |
| b0263 | afuB | 278038 | 278385 | - | 347  | 14  | 0  | 2  | 2  | 2  | 0%   | 14%  | 14%  | 14%  | A | P | P | P | U |
| b0264 | insB | 278402 | 278905 | - | 503  | 20  | 11 | 16 | 16 | 16 | 55%  | 80%  | 80%  | 80%  | P | P | P | P |   |
| b0265 | insA | 278824 | 279099 | - | 275  | 11  | 10 | 10 | 10 | 10 | 91%  | 91%  | 91%  | 91%  | P | P | P | P |   |
| b4505 | insX | 279338 | 279586 | - | 248  | 10  | 10 | 10 | 10 | 10 | 100% | 100% | 100% | 100% | P | P | P | P | U |
| b0266 | yagB | 279651 | 279959 | - | 308  | 12  | 11 | 11 | 11 | 11 | 92%  | 92%  | 92%  | 92%  | P | P | P | P | U |
| b0267 | yagA | 280053 | 281207 | - | 1154 | 46  | 0  | 0  | 6  | 6  | 0%   | 0%   | 13%  | 13%  | A | A | P | P | U |
| b0272 | yagI | 287628 | 288386 | - | 758  | 30  | 23 | 23 | 23 | 23 | 77%  | 77%  | 77%  | 77%  | P | P | P | P | U |
| b0273 | argF | 288525 | 289529 | - | 1004 | 40  | 40 | 40 | 40 | 40 | 100% | 100% | 100% | 100% | P | P | P | P |   |
| b0274 | insB | 289873 | 290376 | - | 503  | 20  | 12 | 14 | 14 | 15 | 60%  | 70%  | 70%  | 75%  | P | P | P | P |   |
| b0275 | insA | 290295 | 290570 | - | 275  | 11  | 11 | 11 | 11 | 11 | 100% | 100% | 100% | 100% | P | P | P | P |   |
| b0277 | yagK | 291546 | 292172 | - | 626  | 25  | 0  | 0  | 0  | 0  | 0%   | 0%   | 0%   | 0%   | A | A | A | A | U |
| b0278 | yagL | 292444 | 293142 | - | 698  | 28  | 0  | 0  | 0  | 0  | 0%   | 0%   | 0%   | 0%   | A | A | A | A |   |
| b0279 | yagM | 293169 | 294023 | - | 854  | 34  | 0  | 0  | 0  | 0  | 0%   | 0%   | 0%   | 0%   | A | A | A | A | U |
| b0280 | yagN | 294363 | 294803 | - | 440  | 18  | 15 | 15 | 15 | 15 | 83%  | 83%  | 83%  | 83%  | P | P | P | P | U |
| b0281 | intF | 294920 | 296320 | - | 1400 | 56  | 53 | 55 | 55 | 55 | 95%  | 98%  | 98%  | 98%  | P | P | P | P | U |
| b0282 | yagP | 296605 | 297015 | - | 410  | 17  | 0  | 1  | 1  | 1  | 0%   | 6%   | 6%   | 6%   | A | P | P | P | U |
| b0283 | yagQ | 296994 | 297950 | - | 956  | 38  | 0  | 2  | 5  | 5  | 0%   | 5%   | 13%  | 13%  | A | P | P | P | U |
| b0284 | yagR | 297960 | 300158 | - | 2198 | 88  | 0  | 2  | 7  | 8  | 0%   | 2%   | 8%   | 9%   | A | P | P | P | U |
| b0285 | yagS | 300155 | 301111 | - | 956  | 38  | 0  | 2  | 2  | 4  | 0%   | 5%   | 5%   | 11%  | A | P | P | P | U |
| b0286 | yagT | 301108 | 301797 | - | 689  | 28  | 0  | 1  | 2  | 8  | 0%   | 4%   | 7%   | 29%  | A | P | P | P | U |
| b0288 | ykgJ | 303077 | 303406 | - | 329  | 13  | 9  | 10 | 10 | 10 | 69%  | 77%  | 77%  | 77%  | P | P | P | P | U |
| b0289 | yagV | 303719 | 304429 | - | 710  | 28  | 2  | 2  | 4  | 4  | 7%   | 7%   | 14%  | 14%  | P | P | P | P | U |
| b0290 | yagW | 304398 | 306041 | - | 1643 | 66  | 10 | 10 | 10 | 10 | 15%  | 15%  | 15%  | 15%  | P | P | P | P | U |
| b0291 | yagX | 306031 | 308556 | - | 2525 | 101 | 0  | 0  | 5  | 5  | 0%   | 0%   | 5%   | 5%   | A | A | P | P | U |
| b0292 | matC | 308582 | 309250 | - | 668  | 27  | 0  | 0  | 0  | 0  | 0%   | 0%   | 0%   | 0%   | A | A | A | A | U |
| b0293 | matB | 309308 | 309895 | - | 587  | 24  | 6  | 6  | 6  | 14 | 25%  | 25%  | 25%  | 58%  | P | P | P | P | U |
| b0294 | matA | 309970 | 310560 | - | 590  | 23  | 0  | 1  | 1  | 1  | 0%   | 4%   | 4%   | 4%   | A | P | P | P | U |
| b4506 | ykgO | 311598 | 311738 | - | 140  | 5   | 3  | 3  | 4  | 5  | 60%  | 60%  | 80%  | 100% | P | P | P | P |   |
| b0296 | ykgM | 311738 | 312001 | - | 263  | 11  | 11 | 11 | 11 | 11 | 100% | 100% | 100% | 100% | P | P | P | P |   |
| b4630 | ykgP | 312940 | 313029 | - | 89   | 4   | 0  | 0  | 0  | 0  | 0%   | 0%   | 0%   | 0%   | A | A | A | A | U |
| b0300 | ykgA | 315710 | 316393 | - | 683  | 28  | 0  | 0  | 0  | 0  | 0%   | 0%   | 0%   | 0%   | A | A | A | A | U |
| b0301 | ykgB | 316950 | 317543 | - | 593  | 24  | 0  | 0  | 0  | 0  | 0%   | 0%   | 0%   | 0%   | A | A | A | A | U |
| b0303 | ykgI | 317555 | 317791 | - | 236  | 9   | 0  | 0  | 0  | 0  | 0%   | 0%   | 0%   | 0%   | A | A | A | A | U |
| b0304 | ykgC | 317900 | 319225 | - | 1325 | 53  | 9  | 9  | 16 | 19 | 17%  | 17%  | 30%  | 36%  | P | P | P | P | U |
| b0310 | ykgH | 323920 | 324588 | - | 668  | 26  | 0  | 0  | 0  | 0  | 0%   | 0%   | 0%   | 0%   | A | A | A | A | U |
| b0311 | betA | 324801 | 326471 | - | 1670 | 67  | 57 | 57 | 57 | 57 | 85%  | 85%  | 85%  | 85%  | P | P | P | P |   |
| b0312 | betB | 326485 | 327957 | - | 1472 | 59  | 57 | 57 | 57 | 57 | 97%  | 97%  | 97%  | 97%  | P | P | P | P |   |
| b0313 | betI | 327971 | 328558 | - | 587  | 23  | 23 | 23 | 23 | 23 | 100% | 100% | 100% | 100% | P | P | P | P |   |
| b0316 | yahB | 332725 | 333657 | - | 932  | 37  | 15 | 17 | 19 | 19 | 41%  | 46%  | 51%  | 51%  | P | P | P | P | U |
| b0317 | yahC | 333749 | 334246 | - | 497  | 20  | 0  | 0  | 0  | 0  | 0%   | 0%   | 0%   | 0%   | A | A | A | A | U |
| b0328 | yahN | 344890 | 345561 | - | 671  | 27  | 0  | 2  | 18 | 18 | 0%   | 7%   | 67%  | 67%  | A | P | P | P |   |
| b0330 | prpR | 346081 | 347667 | - | 1586 | 63  | 0  | 0  | 3  | 3  | 0%   | 0%   | 5%   | 5%   | A | A | P | P |   |
| b0338 | cynR | 357015 | 357914 | - | 899  | 36  | 23 | 23 | 23 | 23 | 64%  | 64%  | 64%  | 64%  | P | P | P | P |   |
| b0342 | lacA | 360473 | 361084 | - | 611  | 24  | 0  | 0  | 0  | 0  | 0%   | 0%   | 0%   | 0%   | A | A | A | A |   |
| b0343 | lacY | 361150 | 362403 | - | 1253 | 50  | 0  | 1  | 4  | 4  | 0%   | 2%   | 8%   | 8%   | A | P | P | P |   |

|         |      |        |        |   |      |     |     |     |     |     |      |      |      |      |   |   |   |   |   |
|---------|------|--------|--------|---|------|-----|-----|-----|-----|-----|------|------|------|------|---|---|---|---|---|
| b0344   | lacZ | 362455 | 365529 | - | 3074 | 123 | 0   | 0   | 5   | 5   | 0%   | 0%   | 4%   | 4%   | A | A | P | P |   |
| b0345   | lacI | 365652 | 366734 | - | 1082 | 44  | 40  | 40  | 40  | 40  | 91%  | 91%  | 91%  | 91%  | P | P | P | P |   |
| b0346   | mhpR | 366811 | 367644 | - | 833  | 33  | 33  | 33  | 33  | 33  | 100% | 100% | 100% | 100% | P | P | P | P |   |
| b0355   | frmB | 376759 | 377592 | - | 833  | 33  | 13  | 20  | 21  | 21  | 39%  | 61%  | 64%  | 64%  | P | P | P | P | U |
| b0356   | frmA | 377686 | 378795 | - | 1109 | 44  | 44  | 44  | 44  | 44  | 100% | 100% | 100% | 100% | P | P | P | P |   |
| b0357   | frmR | 378830 | 379105 | - | 275  | 11  | 11  | 11  | 11  | 11  | 100% | 100% | 100% | 100% | P | P | P | P |   |
| b0358   | yaiO | 379293 | 380066 | - | 773  | 31  | 0   | 1   | 14  | 14  | 0%   | 3%   | 45%  | 45%  | A | P | P | P | U |
| b4579   | yaiX | 380068 | 380483 | - | 415  | 17  | 0   | 1   | 1   | 1   | 0%   | 6%   | 6%   | 6%   | A | P | P | P | U |
| b4579   | yaiX | 381815 | 382096 | - | 281  | 11  | 0   | 1   | 1   | 1   | 0%   | 9%   | 9%   | 9%   | A | P | P | P | U |
| b0363   | yaiP | 381963 | 383159 | - | 1196 | 48  | 0   | 2   | 2   | 2   | 0%   | 4%   | 4%   | 4%   | A | P | P | P | U |
| b0364   | yaiS | 383283 | 383840 | - | 557  | 22  | 0   | 0   | 0   | 0   | 0%   | 0%   | 0%   | 0%   | A | A | A | A | U |
| b0369   | hemB | 387977 | 388951 | - | 974  | 39  | 37  | 37  | 37  | 37  | 95%  | 95%  | 95%  | 95%  | P | P | P | P |   |
| b0372   | insF | 390963 | 391829 | - | 866  | 34  | 33  | 33  | 33  | 33  | 97%  | 97%  | 97%  | 97%  | P | P | P | P |   |
| b0373   | insE | 391826 | 392134 | - | 308  | 12  | 12  | 12  | 12  | 12  | 100% | 100% | 100% | 100% | P | P | P | P |   |
| b0376   | ampH | 394354 | 395511 | - | 1157 | 47  | 42  | 42  | 42  | 42  | 89%  | 89%  | 89%  | 89%  | P | P | P | P |   |
| b0379   | yaiY | 398249 | 398557 | - | 308  | 13  | 0   | 10  | 11  | 11  | 0%   | 77%  | 85%  | 85%  | A | P | P | P | U |
| b0381   | ddlA | 399053 | 400147 | - | 1094 | 44  | 41  | 42  | 44  | 44  | 93%  | 95%  | 100% | 100% | P | P | P | P |   |
| b0386   | proC | 404059 | 404868 | - | 809  | 32  | 32  | 32  | 32  | 32  | 100% | 100% | 100% | 100% | P | P | P | P |   |
| b0393   | rdgC | 408332 | 409243 | - | 911  | 36  | 34  | 34  | 34  | 34  | 94%  | 94%  | 94%  | 94%  | P | P | P | P |   |
| b0396   | araJ | 410521 | 411705 | - | 1184 | 47  | 12  | 12  | 18  | 19  | 26%  | 26%  | 38%  | 40%  | P | P | P | P | U |
| b0397   | sbcC | 411831 | 414977 | - | 3146 | 126 | 105 | 105 | 105 | 105 | 83%  | 83%  | 83%  | 83%  | P | P | P | P |   |
| b0398   | sbcD | 414974 | 416176 | - | 1202 | 48  | 44  | 44  | 44  | 44  | 92%  | 92%  | 92%  | 92%  | P | P | P | P |   |
| b0404   | acpH | 423561 | 424142 | - | 581  | 23  | 16  | 16  | 16  | 16  | 70%  | 70%  | 70%  | 70%  | P | P | P | P | U |
| b0411   | tsx  | 430353 | 431237 | - | 884  | 36  | 36  | 36  | 36  | 36  | 100% | 100% | 100% | 100% | P | P | P | P |   |
| b0412   | yajI | 431536 | 432075 | - | 539  | 22  | 7   | 8   | 9   | 9   | 32%  | 36%  | 41%  | 41%  | P | P | P | P | U |
| b0419   | yajO | 436385 | 437359 | - | 974  | 39  | 38  | 38  | 39  | 39  | 97%  | 97%  | 100% | 100% | P | P | P | P | U |
| b0420   | dxs  | 437539 | 439401 | - | 1862 | 74  | 74  | 74  | 74  | 74  | 100% | 100% | 100% | 100% | P | P | P | P |   |
| b0421   | ispA | 439426 | 440325 | - | 899  | 36  | 36  | 36  | 36  | 36  | 100% | 100% | 100% | 100% | P | P | P | P |   |
| b0422   | xseB | 440325 | 440567 | - | 242  | 10  | 10  | 10  | 10  | 10  | 100% | 100% | 100% | 100% | P | P | P | P |   |
| b0424   | yajL | 442275 | 442865 | - | 590  | 24  | 23  | 23  | 23  | 23  | 96%  | 96%  | 96%  | 96%  | P | P | P | P | U |
| b0425   | panE | 442828 | 443739 | - | 911  | 37  | 37  | 37  | 37  | 37  | 100% | 100% | 100% | 100% | P | P | P | P |   |
| b0427   | yajR | 444526 | 445890 | - | 1364 | 55  | 22  | 23  | 23  | 23  | 40%  | 42%  | 42%  | 42%  | P | P | P | P | U |
| b0428   | cyoE | 446039 | 446929 | - | 890  | 35  | 35  | 35  | 35  | 35  | 100% | 100% | 100% | 100% | P | P | P | P |   |
| b0429   | cyoD | 446941 | 447270 | - | 329  | 13  | 13  | 13  | 13  | 13  | 100% | 100% | 100% | 100% | P | P | P | P |   |
| b0430   | cyoC | 447270 | 447884 | - | 614  | 24  | 24  | 24  | 24  | 24  | 100% | 100% | 100% | 100% | P | P | P | P |   |
| b0431   | cyoB | 447874 | 449865 | - | 1991 | 80  | 80  | 80  | 80  | 80  | 100% | 100% | 100% | 100% | P | P | P | P |   |
| b0432   | cyoA | 449887 | 450834 | - | 947  | 38  | 38  | 38  | 38  | 38  | 100% | 100% | 100% | 100% | P | P | P | P |   |
| b0433   | ampG | 451294 | 452769 | - | 1475 | 59  | 51  | 51  | 51  | 51  | 86%  | 86%  | 86%  | 86%  | P | P | P | P |   |
| b0434   | yajG | 452813 | 453391 | - | 578  | 23  | 23  | 23  | 23  | 23  | 100% | 100% | 100% | 100% | P | P | P | P | U |
| G0-8861 | sraA | 457952 | 458008 | - | 56   | 2   | 0   | 0   | 0   | 0   | 0%   | 0%   | 0%   | 0%   | A | A | A | A |   |
| b0444   | queC | 464076 | 464771 | - | 695  | 28  | 26  | 26  | 26  | 26  | 93%  | 93%  | 93%  | 93%  | P | P | P | P | U |
| b0445   | ybaE | 464836 | 466536 | - | 1700 | 68  | 0   | 0   | 52  | 52  | 0%   | 0%   | 76%  | 76%  | A | A | P | P | U |
| b0452   | tesB | 473525 | 474385 | - | 860  | 35  | 30  | 30  | 30  | 30  | 86%  | 86%  | 86%  | 86%  | P | P | P | P |   |
| b0454   | ybaZ | 475206 | 475595 | - | 389  | 15  | 11  | 11  | 11  | 11  | 73%  | 73%  | 73%  | 73%  | P | P | P | P | U |
| b0457   | ylaB | 476291 | 477841 | - | 1550 | 62  | 14  | 14  | 17  | 21  | 23%  | 23%  | 27%  | 34%  | P | P | P | P | U |
| b0458   | ylaC | 478005 | 478475 | - | 470  | 19  | 19  | 19  | 19  | 19  | 100% | 100% | 100% | 100% | P | P | P | P | U |

|       |      |        |        |   |      |     |     |     |     |     |      |      |      |      |   |   |   |   |   |
|-------|------|--------|--------|---|------|-----|-----|-----|-----|-----|------|------|------|------|---|---|---|---|---|
| b0459 | maa  | 478591 | 479142 | - | 551  | 22  | 21  | 21  | 21  | 21  | 95%  | 95%  | 95%  | 95%  | P | P | P | P |   |
| b0460 | hha  | 479314 | 479532 | - | 218  | 8   | 8   | 8   | 8   | 8   | 100% | 100% | 100% | 100% | P | P | P | P |   |
| b0461 | ybaJ | 479558 | 479932 | - | 374  | 15  | 14  | 14  | 14  | 14  | 93%  | 93%  | 93%  | 93%  | P | P | P | P | U |
| b0462 | acrB | 480478 | 483627 | - | 3149 | 126 | 124 | 124 | 124 | 124 | 98%  | 98%  | 98%  | 98%  | P | P | P | P |   |
| b0463 | acrA | 483650 | 484843 | - | 1193 | 48  | 48  | 48  | 48  | 48  | 100% | 100% | 100% | 100% | P | P | P | P |   |
| b0466 | ybaM | 489334 | 489495 | - | 161  | 6   | 6   | 6   | 6   | 6   | 100% | 100% | 100% | 100% | P | P | P | P | U |
| b0467 | priC | 489509 | 490036 | - | 527  | 21  | 20  | 20  | 20  | 20  | 95%  | 95%  | 95%  | 95%  | P | P | P | P |   |
| b0476 | aes  | 498238 | 499197 | - | 959  | 38  | 0   | 4   | 6   | 6   | 0%   | 11%  | 16%  | 16%  | A | P | P | P |   |
| b0478 | ybaL | 500786 | 502462 | - | 1676 | 68  | 67  | 67  | 67  | 67  | 99%  | 99%  | 99%  | 99%  | P | P | P | P | U |
| b0479 | fsr  | 502700 | 503920 | - | 1220 | 49  | 8   | 8   | 9   | 9   | 16%  | 16%  | 18%  | 18%  | P | P | P | P | U |
| b0481 | ybaK | 505827 | 506306 | - | 479  | 19  | 18  | 18  | 18  | 18  | 95%  | 95%  | 95%  | 95%  | P | P | P | P | U |
| b0482 | ybaP | 506510 | 507304 | - | 794  | 32  | 29  | 29  | 29  | 29  | 91%  | 91%  | 91%  | 91%  | P | P | P | P | U |
| b0484 | copA | 508099 | 510603 | - | 2504 | 100 | 99  | 99  | 99  | 99  | 99%  | 99%  | 99%  | 99%  | P | P | P | P |   |
| b0488 | ybbJ | 513625 | 514083 | - | 458  | 18  | 15  | 15  | 18  | 18  | 83%  | 83%  | 100% | 100% | P | P | P | P | U |
| b0489 | qmcA | 514080 | 514997 | - | 917  | 37  | 36  | 36  | 37  | 37  | 97%  | 97%  | 100% | 100% | P | P | P | P | U |
| b0492 | ybbN | 516649 | 517503 | - | 854  | 34  | 34  | 34  | 34  | 34  | 100% | 100% | 100% | 100% | P | P | P | P | U |
| b0493 | ybbO | 517564 | 518373 | - | 809  | 33  | 33  | 33  | 33  | 33  | 100% | 100% | 100% | 100% | P | P | P | P | U |
| b0494 | tesA | 518363 | 518989 | - | 626  | 26  | 26  | 26  | 26  | 26  | 100% | 100% | 100% | 100% | P | P | P | P |   |
| b0502 | ylbG | 528819 | 529240 | - | 421  | 17  | 8   | 8   | 8   | 10  | 47%  | 47%  | 47%  | 59%  | P | P | P | P | U |
| b0503 | ybbB | 529356 | 530450 | - | 1094 | 44  | 32  | 32  | 32  | 32  | 73%  | 73%  | 73%  | 73%  | P | P | P | P |   |
| b0504 | allS | 530519 | 531445 | - | 926  | 37  | 0   | 1   | 1   | 1   | 0%   | 3%   | 3%   | 3%   | A | P | P | P |   |
| b0515 | ylbA | 542485 | 543270 | - | 785  | 32  | 23  | 25  | 26  | 29  | 72%  | 78%  | 81%  | 91%  | P | P | P | P | U |
| b0516 | allC | 543281 | 544516 | - | 1235 | 50  | 13  | 16  | 20  | 21  | 26%  | 32%  | 40%  | 42%  | P | P | P | P |   |
| b0517 | allD | 544538 | 545587 | - | 1049 | 42  | 0   | 0   | 2   | 2   | 0%   | 0%   | 5%   | 5%   | A | A | P | P |   |
| b0522 | purK | 550750 | 551817 | - | 1067 | 43  | 43  | 43  | 43  | 43  | 100% | 100% | 100% | 100% | P | P | P | P |   |
| b0523 | purE | 551814 | 552323 | - | 509  | 21  | 21  | 21  | 21  | 21  | 100% | 100% | 100% | 100% | P | P | P | P |   |
| b0524 | lpxH | 552441 | 553163 | - | 722  | 28  | 27  | 27  | 27  | 27  | 96%  | 96%  | 96%  | 96%  | P | P | P | P |   |
| b0525 | ppiB | 553166 | 553660 | - | 494  | 19  | 19  | 19  | 19  | 19  | 100% | 100% | 100% | 100% | P | P | P | P |   |
| b0527 | ybcI | 555255 | 555776 | - | 521  | 21  | 0   | 1   | 2   | 3   | 0%   | 5%   | 10%  | 14%  | A | P | P | P | U |
| b0528 | ybcJ | 555884 | 556096 | - | 212  | 9   | 6   | 6   | 6   | 6   | 67%  | 67%  | 67%  | 67%  | P | P | P | P | U |
| b0529 | fold | 556098 | 556964 | - | 866  | 35  | 35  | 35  | 35  | 35  | 100% | 100% | 100% | 100% | P | P | P | P |   |
| b0535 | fimZ | 563071 | 563703 | - | 632  | 25  | 0   | 0   | 0   | 0   | 0%   | 0%   | 0%   | 0%   | A | A | A | A | U |
| b0537 | intD | 564038 | 565201 | - | 1163 | 47  | 40  | 41  | 41  | 42  | 85%  | 87%  | 87%  | 89%  | P | P | P | P | U |
| b4633 | xisD | 565081 | 565302 | - | 221  | 9   | 6   | 6   | 6   | 6   | 67%  | 67%  | 67%  | 67%  | P | P | P | P | U |
| b0539 | exoD | 565321 | 565599 | - | 278  | 11  | 0   | 0   | 0   | 0   | 0%   | 0%   | 0%   | 0%   | A | A | A | A | U |
| b0553 | nmpC | 573752 | 573809 | - | 57   | 2   | 0   | 0   | 0   | 0   | 0%   | 0%   | 0%   | 0%   | A | A | A | A | U |
| b0552 | insH | 573960 | 574976 | - | 1016 | 41  | 41  | 41  | 41  | 41  | 100% | 100% | 100% | 100% | P | P | P | P |   |
| b0553 | nmpC | 575009 | 576048 | - | 1039 | 42  | 42  | 42  | 42  | 42  | 100% | 100% | 100% | 100% | P | P | P | P | U |
| b0557 | borD | 577823 | 578116 | - | 293  | 12  | 12  | 12  | 12  | 12  | 100% | 100% | 100% | 100% | P | P | P | P | U |
| b0558 | ybcV | 578407 | 578817 | - | 410  | 16  | 0   | 0   | 0   | 0   | 0%   | 0%   | 0%   | 0%   | A | A | A | A | U |
| b4589 | ylcI | 579474 | 579668 | - | 194  | 8   | 0   | 1   | 1   | 4   | 0%   | 13%  | 13%  | 50%  | A | P | P | P | U |
| b0562 | ybcY | 581375 | 582029 | - | 654  | 26  | 0   | 1   | 3   | 3   | 0%   | 4%   | 12%  | 12%  | A | P | P | P | U |
| b0565 | ompT | 583903 | 584856 | - | 953  | 38  | 38  | 38  | 38  | 38  | 100% | 100% | 100% | 100% | P | P | P | P |   |
| b0566 | envY | 585370 | 586131 | - | 761  | 30  | 0   | 2   | 2   | 2   | 0%   | 7%   | 7%   | 7%   | A | P | P | P |   |
| b0567 | ybcH | 586314 | 587204 | - | 890  | 36  | 6   | 9   | 9   | 9   | 17%  | 25%  | 25%  | 25%  | P | P | P | P | U |
| b0568 | nfrA | 587205 | 590177 | - | 2972 | 119 | 49  | 50  | 51  | 51  | 41%  | 42%  | 43%  | 43%  | P | P | P | P |   |

|       |      |        |        |   |      |     |     |     |     |     |      |      |      |      |   |   |   |   |   |
|-------|------|--------|--------|---|------|-----|-----|-----|-----|-----|------|------|------|------|---|---|---|---|---|
| b0569 | nfrB | 590164 | 592401 | - | 2237 | 90  | 4   | 11  | 20  | 20  | 4%   | 12%  | 22%  | 22%  | P | P | P | P |   |
| b0570 | cusS | 592551 | 593993 | - | 1442 | 58  | 37  | 37  | 37  | 37  | 64%  | 64%  | 64%  | 64%  | P | P | P | P |   |
| b0571 | cusR | 593983 | 594666 | - | 683  | 27  | 26  | 26  | 26  | 26  | 96%  | 96%  | 96%  | 96%  | P | P | P | P |   |
| b0577 | ybdG | 602639 | 603886 | - | 1247 | 50  | 38  | 38  | 38  | 38  | 76%  | 76%  | 76%  | 76%  | P | P | P | P | U |
| b0578 | nfsB | 603994 | 604647 | - | 653  | 27  | 26  | 26  | 26  | 26  | 96%  | 96%  | 96%  | 96%  | P | P | P | P |   |
| b0579 | ybdF | 604741 | 605109 | - | 368  | 15  | 14  | 14  | 14  | 14  | 93%  | 93%  | 93%  | 93%  | P | P | P | P | U |
| b0580 | ybdJ | 605174 | 605422 | - | 248  | 10  | 6   | 6   | 6   | 6   | 60%  | 60%  | 60%  | 60%  | P | P | P | P | U |
| b0581 | ybdK | 605488 | 606606 | - | 1118 | 45  | 28  | 29  | 39  | 39  | 62%  | 64%  | 87%  | 87%  | P | P | P | P | U |
| b0583 | entD | 608682 | 609311 | - | 629  | 25  | 0   | 0   | 0   | 16  | 0%   | 0%   | 0%   | 64%  | A | A | A | P |   |
| b0584 | fepA | 609477 | 611717 | - | 2240 | 89  | 18  | 18  | 36  | 88  | 20%  | 20%  | 40%  | 99%  | P | P | P | P |   |
| b0588 | fepC | 618607 | 619422 | - | 815  | 33  | 7   | 7   | 7   | 28  | 21%  | 21%  | 21%  | 85%  | P | P | P | P |   |
| b0589 | fepG | 619419 | 620411 | - | 992  | 40  | 5   | 5   | 5   | 28  | 13%  | 13%  | 13%  | 70%  | P | P | P | P |   |
| b0590 | fepD | 620408 | 621412 | - | 1004 | 40  | 6   | 6   | 11  | 22  | 15%  | 15%  | 28%  | 55%  | P | P | P | P |   |
| b0592 | fepB | 622777 | 623733 | - | 956  | 38  | 15  | 15  | 15  | 34  | 39%  | 39%  | 39%  | 89%  | P | P | P | P |   |
| b0599 | ybdH | 631612 | 632700 | - | 1088 | 44  | 43  | 44  | 44  | 44  | 98%  | 100% | 100% | 100% | P | P | P | P | U |
| b0601 | ybdM | 633970 | 634599 | - | 629  | 26  | 7   | 7   | 7   | 7   | 27%  | 27%  | 27%  | 27%  | P | P | P | P | U |
| b0602 | ybdN | 634572 | 635792 | - | 1220 | 48  | 0   | 0   | 0   | 0   | 0%   | 0%   | 0%   | 0%   | A | A | A | A | U |
| b0603 | ybdO | 635939 | 636841 | - | 902  | 36  | 0   | 0   | 0   | 0   | 0%   | 0%   | 0%   | 0%   | A | A | A | A | U |
| b0604 | dsbG | 637050 | 637796 | - | 746  | 30  | 27  | 27  | 27  | 28  | 90%  | 90%  | 90%  | 93%  | P | P | P | P |   |
| b0607 | uspG | 640662 | 641090 | - | 428  | 17  | 16  | 17  | 17  | 17  | 94%  | 100% | 100% | 100% | P | P | P | P |   |
| b0610 | rnk  | 642780 | 643190 | - | 410  | 17  | 14  | 14  | 14  | 14  | 82%  | 82%  | 82%  | 82%  | P | P | P | P |   |
| b0611 | rna  | 643420 | 644226 | - | 806  | 32  | 32  | 32  | 32  | 32  | 100% | 100% | 100% | 100% | P | P | P | P |   |
| b0612 | citT | 644340 | 645803 | - | 1463 | 58  | 0   | 0   | 2   | 2   | 0%   | 0%   | 3%   | 3%   | A | A | P | P |   |
| b0613 | citG | 645854 | 646732 | - | 878  | 35  | 0   | 0   | 0   | 0   | 0%   | 0%   | 0%   | 0%   | A | A | A | A |   |
| b0614 | citX | 646707 | 647258 | - | 551  | 22  | 0   | 0   | 0   | 0   | 0%   | 0%   | 0%   | 0%   | A | A | A | A |   |
| b0615 | citF | 647262 | 648794 | - | 1532 | 62  | 0   | 0   | 0   | 0   | 0%   | 0%   | 0%   | 0%   | A | A | A | A |   |
| b0616 | citE | 648805 | 649713 | - | 908  | 36  | 0   | 0   | 0   | 0   | 0%   | 0%   | 0%   | 0%   | A | A | A | A |   |
| b0617 | citD | 649710 | 650006 | - | 296  | 12  | 0   | 0   | 0   | 0   | 0%   | 0%   | 0%   | 0%   | A | A | A | A |   |
| b0618 | citC | 650021 | 651079 | - | 1058 | 42  | 0   | 0   | 0   | 0   | 0%   | 0%   | 0%   | 0%   | A | A | A | A |   |
| b0621 | dcuC | 653806 | 655191 | - | 1385 | 55  | 0   | 2   | 6   | 10  | 0%   | 4%   | 11%  | 18%  | A | P | P | P |   |
| b0624 | crcB | 656778 | 657161 | - | 383  | 15  | 15  | 15  | 15  | 15  | 100% | 100% | 100% | 100% | P | P | P | P | U |
| b0628 | lipA | 658474 | 659439 | - | 965  | 39  | 37  | 38  | 38  | 38  | 95%  | 97%  | 97%  | 97%  | P | P | P | P |   |
| b0629 | ybeF | 659648 | 660601 | - | 953  | 39  | 0   | 0   | 1   | 1   | 0%   | 0%   | 3%   | 3%   | A | A | P | P | U |
| b0630 | lipB | 660860 | 661501 | - | 641  | 26  | 24  | 24  | 24  | 24  | 92%  | 92%  | 92%  | 92%  | P | P | P | P |   |
| b0631 | ybeD | 661602 | 661865 | - | 263  | 10  | 10  | 10  | 10  | 10  | 100% | 100% | 100% | 100% | P | P | P | P | U |
| b0632 | dacA | 661975 | 663186 | - | 1211 | 48  | 48  | 48  | 48  | 48  | 100% | 100% | 100% | 100% | P | P | P | P |   |
| b0633 | rlpA | 663325 | 664413 | - | 1088 | 44  | 43  | 43  | 43  | 43  | 98%  | 98%  | 98%  | 98%  | P | P | P | P |   |
| b0634 | mrdb | 664424 | 665536 | - | 1112 | 45  | 45  | 45  | 45  | 45  | 100% | 100% | 100% | 100% | P | P | P | P |   |
| b0635 | mrda | 665539 | 667440 | - | 1901 | 76  | 74  | 74  | 74  | 74  | 97%  | 97%  | 97%  | 97%  | P | P | P | P |   |
| b0636 | ybeA | 667471 | 667938 | - | 467  | 19  | 19  | 19  | 19  | 19  | 100% | 100% | 100% | 100% | P | P | P | P | U |
| b0637 | ybeB | 667942 | 668259 | - | 317  | 13  | 13  | 13  | 13  | 13  | 100% | 100% | 100% | 100% | P | P | P | P | U |
| b0638 | cobC | 668519 | 669130 | - | 611  | 25  | 18  | 18  | 18  | 18  | 72%  | 72%  | 72%  | 72%  | P | P | P | P | U |
| b0639 | nadD | 669154 | 669795 | - | 641  | 26  | 26  | 26  | 26  | 26  | 100% | 100% | 100% | 100% | P | P | P | P |   |
| b0640 | holA | 669797 | 670828 | - | 1031 | 41  | 40  | 40  | 40  | 40  | 98%  | 98%  | 98%  | 98%  | P | P | P | P |   |
| b0641 | rlpB | 670828 | 671409 | - | 581  | 24  | 24  | 24  | 24  | 24  | 100% | 100% | 100% | 100% | P | P | P | P |   |
| b0642 | leuS | 671424 | 674006 | - | 2582 | 104 | 103 | 103 | 103 | 103 | 99%  | 99%  | 99%  | 99%  | P | P | P | P |   |

|         |      |        |        |   |      |     |    |    |    |    |      |      |      |      |   |   |   |   |   |
|---------|------|--------|--------|---|------|-----|----|----|----|----|------|------|------|------|---|---|---|---|---|
| b0644   | ybeQ | 674793 | 675770 | - | 977  | 39  | 0  | 3  | 5  | 21 | 0%   | 8%   | 13%  | 54%  | A | P | P | P | U |
| b0647   | ybeT | 678075 | 678629 | - | 554  | 22  | 0  | 0  | 0  | 0  | 0%   | 0%   | 0%   | 0%   | A | A | A | A | U |
| b0650   | hscC | 680946 | 682616 | - | 1670 | 67  | 0  | 3  | 6  | 6  | 0%   | 4%   | 9%   | 9%   | A | P | P | P |   |
| b0651   | rihA | 682700 | 683635 | - | 935  | 38  | 36 | 36 | 36 | 36 | 95%  | 95%  | 95%  | 95%  | P | P | P | P |   |
| b0652   | gltL | 683753 | 684478 | - | 725  | 29  | 28 | 28 | 28 | 28 | 97%  | 97%  | 97%  | 97%  | P | P | P | P |   |
| b0653   | gltK | 684478 | 685152 | - | 674  | 27  | 25 | 25 | 25 | 26 | 93%  | 93%  | 93%  | 96%  | P | P | P | P |   |
| b0654   | gltJ | 685152 | 685892 | - | 740  | 30  | 26 | 26 | 26 | 26 | 87%  | 87%  | 87%  | 87%  | P | P | P | P |   |
| GO-9383 | sroC | 685904 | 686066 | - | 162  | 7   | 6  | 6  | 6  | 6  | 86%  | 86%  | 86%  | 86%  | P | P | P | P |   |
| b0655   | gltI | 686062 | 686970 | - | 908  | 36  | 36 | 36 | 36 | 36 | 100% | 100% | 100% | 100% | P | P | P | P |   |
| b0656   | insH | 687220 | 688236 | - | 1016 | 41  | 41 | 41 | 41 | 41 | 100% | 100% | 100% | 100% | P | P | P | P |   |
| b0657   | Int  | 688566 | 690104 | - | 1538 | 61  | 56 | 56 | 56 | 56 | 92%  | 92%  | 92%  | 92%  | P | P | P | P |   |
| b0658   | ybeX | 690129 | 691007 | - | 878  | 36  | 36 | 36 | 36 | 36 | 100% | 100% | 100% | 100% | P | P | P | P |   |
| b0659   | ybeY | 691097 | 691564 | - | 467  | 19  | 19 | 19 | 19 | 19 | 100% | 100% | 100% | 100% | P | P | P | P | U |
| b0660   | ybeZ | 691561 | 692601 | - | 1040 | 41  | 41 | 41 | 41 | 41 | 100% | 100% | 100% | 100% | P | P | P | P | U |
| b0661   | miaB | 692754 | 694178 | - | 1424 | 57  | 56 | 56 | 56 | 56 | 98%  | 98%  | 98%  | 98%  | P | P | P | P |   |
| b0664   | glnX | 695653 | 695727 | - | 74   | 3   | 3  | 3  | 3  | 3  | 100% | 100% | 100% | 100% | P | P | P | P |   |
| b0665   | glnV | 695765 | 695839 | - | 74   | 3   | 3  | 3  | 3  | 3  | 100% | 100% | 100% | 100% | P | P | P | P |   |
| b0666   | metU | 695887 | 695963 | - | 76   | 3   | 3  | 3  | 3  | 3  | 100% | 100% | 100% | 100% | P | P | P | P |   |
| b0668   | glnW | 695979 | 696053 | - | 74   | 3   | 3  | 3  | 3  | 3  | 100% | 100% | 100% | 100% | P | P | P | P |   |
| b0670   | glnU | 696088 | 696162 | - | 74   | 3   | 3  | 3  | 3  | 3  | 100% | 100% | 100% | 100% | P | P | P | P |   |
| b0672   | leuW | 696186 | 696270 | - | 84   | 3   | 3  | 3  | 3  | 3  | 100% | 100% | 100% | 100% | P | P | P | P |   |
| b0673   | metT | 696280 | 696356 | - | 76   | 4   | 4  | 4  | 4  | 4  | 100% | 100% | 100% | 100% | P | P | P | P |   |
| b0674   | asnB | 696736 | 698400 | - | 1664 | 66  | 65 | 65 | 65 | 66 | 98%  | 98%  | 98%  | 100% | P | P | P | P |   |
| b0675   | nagD | 698797 | 699549 | - | 752  | 30  | 30 | 30 | 30 | 30 | 100% | 100% | 100% | 100% | P | P | P | P |   |
| b0676   | nagC | 699597 | 700817 | - | 1220 | 49  | 48 | 48 | 48 | 48 | 98%  | 98%  | 98%  | 98%  | P | P | P | P |   |
| b0677   | nagA | 700826 | 701974 | - | 1148 | 46  | 44 | 45 | 45 | 46 | 96%  | 98%  | 98%  | 100% | P | P | P | P |   |
| b0678   | nagB | 702034 | 702834 | - | 800  | 32  | 30 | 30 | 31 | 31 | 94%  | 94%  | 97%  | 97%  | P | P | P | P |   |
| b0683   | fur  | 709423 | 709869 | - | 446  | 18  | 18 | 18 | 18 | 18 | 100% | 100% | 100% | 100% | P | P | P | P |   |
| b4637   | uof  | 709862 | 709948 | - | 86   | 3   | 3  | 3  | 3  | 3  | 100% | 100% | 100% | 100% | P | P | P | P |   |
| b0684   | fldA | 710158 | 710688 | - | 530  | 21  | 21 | 21 | 21 | 21 | 100% | 100% | 100% | 100% | P | P | P | P |   |
| b0685   | ybfE | 710828 | 711121 | - | 293  | 12  | 12 | 12 | 12 | 12 | 100% | 100% | 100% | 100% | P | P | P | P | U |
| b0686   | ybfF | 711261 | 712025 | - | 764  | 30  | 29 | 29 | 29 | 29 | 97%  | 97%  | 97%  | 97%  | P | P | P | P | U |
| b0691   | ybfG | 715170 | 715820 | - | 650  | 26  | 0  | 0  | 0  | 0  | 0%   | 0%   | 0%   | 0%   | A | A | A | A | U |
| b4636   | ybfI | 715944 | 716093 | - | 149  | 6   | 0  | 0  | 1  | 1  | 0%   | 0%   | 17%  | 17%  | A | A | P | P | U |
| b0692   | potE | 716169 | 717488 | - | 1319 | 53  | 0  | 8  | 22 | 22 | 0%   | 15%  | 42%  | 42%  | A | P | P | P |   |
| b0693   | speF | 717485 | 719683 | - | 2198 | 88  | 0  | 1  | 3  | 3  | 0%   | 1%   | 3%   | 3%   | A | P | P | P |   |
| b0694   | kdpE | 720279 | 720956 | - | 677  | 28  | 21 | 22 | 27 | 27 | 75%  | 79%  | 96%  | 96%  | P | P | P | P |   |
| b0695   | kdpD | 720953 | 723637 | - | 2684 | 108 | 78 | 78 | 79 | 79 | 72%  | 72%  | 73%  | 73%  | P | P | P | P |   |
| b0696   | kdpC | 723630 | 724202 | - | 572  | 23  | 14 | 14 | 14 | 14 | 61%  | 61%  | 61%  | 61%  | P | P | P | P |   |
| b0697   | kdpB | 724211 | 726259 | - | 2048 | 82  | 0  | 0  | 1  | 1  | 0%   | 0%   | 1%   | 1%   | A | A | P | P |   |
| b0698   | kdpA | 726282 | 727955 | - | 1673 | 67  | 0  | 0  | 1  | 1  | 0%   | 0%   | 1%   | 1%   | A | A | P | P |   |
| b4513   | kdpF | 727955 | 728044 | - | 89   | 4   | 0  | 0  | 1  | 1  | 0%   | 0%   | 25%  | 25%  | A | A | P | P |   |
| b0709   | ybgH | 740298 | 741779 | - | 1481 | 59  | 43 | 47 | 47 | 47 | 73%  | 80%  | 80%  | 80%  | P | P | P | P | U |
| b0715   | abrB | 745946 | 746992 | - | 1046 | 42  | 0  | 3  | 5  | 8  | 0%   | 7%   | 12%  | 19%  | A | P | P | P | U |
| b0716   | ybgO | 747144 | 748205 | - | 1061 | 42  | 0  | 0  | 2  | 2  | 0%   | 0%   | 5%   | 5%   | A | A | P | P | U |
| b0717   | ybgP | 748202 | 748930 | - | 728  | 29  | 0  | 0  | 0  | 0  | 0%   | 0%   | 0%   | 0%   | A | A | A | A | U |



|       |      |        |        |   |      |    |    |    |    |    |      |      |      |      |   |   |   |   |   |
|-------|------|--------|--------|---|------|----|----|----|----|----|------|------|------|------|---|---|---|---|---|
| b0718 | ybgQ | 748945 | 751392 | - | 2447 | 98 | 0  | 0  | 0  | 0  | 0%   | 0%   | 0%   | 0%   | A | A | A | A | U |
| b0719 | ybgD | 751452 | 752018 | - | 566  | 23 | 0  | 0  | 0  | 0  | 0%   | 0%   | 0%   | 0%   | A | A | A | A | U |
| b0720 | gltA | 752408 | 753691 | - | 1283 | 52 | 52 | 52 | 52 | 52 | 100% | 100% | 100% | 100% | P | P | P | P |   |
| b0730 | mngR | 764376 | 765098 | - | 722  | 29 | 18 | 29 | 29 | 29 | 62%  | 100% | 100% | 100% | P | P | P | P |   |
| b0752 | zitB | 783105 | 784046 | - | 941  | 38 | 26 | 26 | 29 | 30 | 68%  | 68%  | 76%  | 79%  | P | P | P | P |   |
| b0753 | ybgS | 784160 | 784540 | - | 380  | 15 | 13 | 13 | 13 | 14 | 87%  | 87%  | 87%  | 93%  | P | P | P | P | U |
| b0755 | gpmA | 786066 | 786818 | - | 752  | 30 | 30 | 30 | 30 | 30 | 100% | 100% | 100% | 100% | P | P | P | P |   |
| b0756 | galM | 787020 | 788060 | - | 1040 | 42 | 41 | 41 | 41 | 41 | 98%  | 98%  | 98%  | 98%  | P | P | P | P |   |
| b0757 | galK | 788054 | 789202 | - | 1148 | 46 | 46 | 46 | 46 | 46 | 100% | 100% | 100% | 100% | P | P | P | P |   |
| b0758 | galT | 789206 | 790252 | - | 1046 | 42 | 41 | 41 | 41 | 41 | 98%  | 98%  | 98%  | 98%  | P | P | P | P |   |
| b0759 | galE | 790262 | 791278 | - | 1016 | 40 | 40 | 40 | 40 | 40 | 100% | 100% | 100% | 100% | P | P | P | P |   |
| b0760 | modF | 791539 | 793011 | - | 1472 | 59 | 57 | 57 | 57 | 57 | 97%  | 97%  | 97%  | 97%  | P | P | P | P |   |
| b0761 | modE | 793079 | 793867 | - | 788  | 32 | 29 | 29 | 29 | 29 | 91%  | 91%  | 91%  | 91%  | P | P | P | P |   |
| b0766 | ybhA | 796836 | 797654 | - | 818  | 32 | 32 | 32 | 32 | 32 | 100% | 100% | 100% | 100% | P | P | P | P | U |
| b0768 | ybhD | 798845 | 799798 | - | 953  | 38 | 0  | 0  | 0  | 0  | 0%   | 0%   | 0%   | 0%   | A | A | A | A | U |
| b0772 | ybhC | 805221 | 806504 | - | 1283 | 51 | 51 | 51 | 51 | 51 | 100% | 100% | 100% | 100% | P | P | P | P | U |
| b0773 | ybhB | 806656 | 807132 | - | 476  | 19 | 18 | 18 | 18 | 18 | 95%  | 95%  | 95%  | 95%  | P | P | P | P | U |
| b0774 | bioA | 807191 | 808480 | - | 1289 | 52 | 49 | 49 | 49 | 49 | 94%  | 94%  | 94%  | 94%  | P | P | P | P |   |
| b4591 | ybhU | 812337 | 812474 | - | 137  | 5  | 0  | 0  | 0  | 0  | 0%   | 0%   | 0%   | 0%   | A | A | A | A | U |
| b0780 | ybhK | 814962 | 815870 | - | 908  | 37 | 34 | 34 | 34 | 34 | 92%  | 92%  | 92%  | 92%  | P | P | P | P | U |
| b0788 | ybhN | 820765 | 821721 | - | 956  | 39 | 0  | 0  | 2  | 11 | 0%   | 0%   | 5%   | 28%  | A | A | P | P | U |
| b0789 | ybhO | 821721 | 822962 | - | 1241 | 49 | 35 | 36 | 37 | 43 | 71%  | 73%  | 76%  | 88%  | P | P | P | P |   |
| b0790 | ybhP | 822959 | 823720 | - | 761  | 31 | 25 | 25 | 25 | 28 | 81%  | 81%  | 81%  | 90%  | P | P | P | P | U |
| b0792 | ybhR | 824225 | 825331 | - | 1106 | 44 | 16 | 16 | 16 | 23 | 36%  | 36%  | 36%  | 52%  | P | P | P | P | U |
| b0793 | ybhS | 825342 | 826475 | - | 1133 | 45 | 21 | 21 | 22 | 25 | 47%  | 47%  | 49%  | 56%  | P | P | P | P | U |
| b0794 | ybhF | 826468 | 828204 | - | 1736 | 69 | 58 | 58 | 58 | 58 | 84%  | 84%  | 84%  | 84%  | P | P | P | P | U |
| b0795 | ybhG | 828197 | 829195 | - | 998  | 40 | 40 | 40 | 40 | 40 | 100% | 100% | 100% | 100% | P | P | P | P | U |
| b0796 | ybiH | 829195 | 829866 | - | 671  | 27 | 18 | 18 | 18 | 19 | 67%  | 67%  | 67%  | 70%  | P | P | P | P | U |
| b0798 | ybiA | 831691 | 832173 | - | 482  | 19 | 4  | 5  | 5  | 5  | 21%  | 26%  | 26%  | 26%  | P | P | P | P | U |
| b0802 | ybiJ | 836888 | 837148 | - | 260  | 11 | 10 | 10 | 11 | 11 | 91%  | 91%  | 100% | 100% | P | P | P | P | U |
| b0803 | ybiI | 837413 | 837679 | - | 266  | 11 | 4  | 6  | 11 | 11 | 36%  | 55%  | 100% | 100% | P | P | P | P | U |
| b0804 | ybiX | 837753 | 838430 | - | 677  | 27 | 3  | 3  | 3  | 12 | 11%  | 11%  | 11%  | 44%  | P | P | P | P | U |
| b0805 | fiu  | 838472 | 840754 | - | 2282 | 91 | 22 | 22 | 27 | 68 | 24%  | 24%  | 30%  | 75%  | P | P | P | P | U |
| b0806 | ybiM | 841019 | 841279 | - | 260  | 11 | 5  | 6  | 11 | 11 | 45%  | 55%  | 100% | 100% | P | P | P | P | U |
| b0808 | ybiO | 842478 | 844703 | - | 2225 | 89 | 12 | 13 | 14 | 25 | 13%  | 15%  | 16%  | 28%  | P | P | P | P | U |
| b0809 | glnQ | 844964 | 845686 | - | 722  | 29 | 29 | 29 | 29 | 29 | 100% | 100% | 100% | 100% | P | P | P | P |   |
| b0810 | glnP | 845683 | 846342 | - | 659  | 26 | 26 | 26 | 26 | 26 | 100% | 100% | 100% | 100% | P | P | P | P |   |
| b0811 | glnH | 846481 | 847227 | - | 746  | 30 | 30 | 30 | 30 | 30 | 100% | 100% | 100% | 100% | P | P | P | P |   |
| b0812 | dps  | 847631 | 848134 | - | 503  | 20 | 20 | 20 | 20 | 20 | 100% | 100% | 100% | 100% | P | P | P | P |   |
| b0813 | rhtA | 848433 | 849320 | - | 887  | 35 | 2  | 2  | 4  | 4  | 6%   | 6%   | 11%  | 11%  | P | P | P | P |   |
| b0815 | ybiP | 850237 | 851820 | - | 1583 | 63 | 10 | 10 | 10 | 10 | 16%  | 16%  | 16%  | 16%  | P | P | P | P | U |
| b4416 | rybA | 852175 | 852263 | - | 88   | 3  | 3  | 3  | 3  | 3  | 100% | 100% | 100% | 100% | P | P | P | P | U |
| b0819 | ybiS | 854047 | 854967 | - | 920  | 37 | 35 | 35 | 35 | 35 | 95%  | 95%  | 95%  | 95%  | P | P | P | P | U |
| b0821 | ybiU | 857019 | 858284 | - | 1265 | 51 | 36 | 36 | 37 | 37 | 71%  | 71%  | 73%  | 73%  | P | P | P | P | U |
| b0822 | ybiV | 858436 | 859251 | - | 815  | 33 | 31 | 31 | 31 | 32 | 94%  | 94%  | 94%  | 97%  | P | P | P | P | U |
| b0823 | ybiW | 859397 | 861829 | - | 2432 | 98 | 0  | 2  | 4  | 4  | 0%   | 2%   | 4%   | 4%   | A | P | P | P | U |

|       |      |        |        |   |      |    |    |    |    |    |      |      |      |      |   |   |   |   |   |
|-------|------|--------|--------|---|------|----|----|----|----|----|------|------|------|------|---|---|---|---|---|
| b0824 | ybiY | 861835 | 862761 | - | 926  | 37 | 0  | 0  | 0  | 0  | 0%   | 0%   | 0%   | 0%   | A | A | A | A | U |
| b0826 | moeB | 863603 | 864352 | - | 749  | 30 | 22 | 22 | 23 | 23 | 73%  | 73%  | 77%  | 77%  | P | P | P | P |   |
| b0827 | moeA | 864352 | 865587 | - | 1235 | 49 | 49 | 49 | 49 | 49 | 100% | 100% | 100% | 100% | P | P | P | P |   |
| b0835 | yliG | 875933 | 877258 | - | 1325 | 53 | 52 | 52 | 52 | 52 | 98%  | 98%  | 98%  | 98%  | P | P | P | P | U |
| b0838 | yliJ | 879077 | 879703 | - | 626  | 25 | 23 | 23 | 24 | 24 | 92%  | 92%  | 96%  | 96%  | P | P | P | P | U |
| b0840 | deoR | 881199 | 881957 | - | 758  | 30 | 29 | 29 | 29 | 29 | 97%  | 97%  | 97%  | 97%  | P | P | P | P |   |
| b0841 | ybjG | 882015 | 882611 | - | 596  | 24 | 24 | 24 | 24 | 24 | 100% | 100% | 100% | 100% | P | P | P | P |   |
| b0843 | ybjH | 884169 | 884453 | - | 284  | 11 | 4  | 4  | 4  | 4  | 36%  | 36%  | 36%  | 36%  | P | P | P | P | U |
| b0844 | ybjI | 884539 | 885354 | - | 815  | 32 | 31 | 31 | 31 | 31 | 97%  | 97%  | 97%  | 97%  | P | P | P | P | U |
| b0845 | ybjJ | 885354 | 886562 | - | 1208 | 49 | 37 | 39 | 39 | 39 | 76%  | 80%  | 80%  | 80%  | P | P | P | P | U |
| b4417 | rybB | 887199 | 887277 | - | 78   | 3  | 1  | 2  | 2  | 2  | 33%  | 67%  | 67%  | 67%  | P | P | P | P |   |
| b0847 | ybjL | 887357 | 889042 | - | 1685 | 67 | 61 | 61 | 61 | 61 | 91%  | 91%  | 91%  | 91%  | P | P | P | P | U |
| b0849 | grxA | 889719 | 889976 | - | 257  | 10 | 8  | 9  | 9  | 9  | 80%  | 90%  | 90%  | 90%  | P | P | P | P |   |
| b0860 | artJ | 899067 | 899798 | - | 731  | 29 | 29 | 29 | 29 | 29 | 100% | 100% | 100% | 100% | P | P | P | P |   |
| b0861 | artM | 900089 | 900757 | - | 668  | 27 | 27 | 27 | 27 | 27 | 100% | 100% | 100% | 100% | P | P | P | P |   |
| b0862 | artQ | 900757 | 901473 | - | 716  | 29 | 28 | 28 | 28 | 28 | 97%  | 97%  | 97%  | 97%  | P | P | P | P |   |
| b0863 | artI | 901480 | 902211 | - | 731  | 30 | 30 | 30 | 30 | 30 | 100% | 100% | 100% | 100% | P | P | P | P |   |
| b0864 | artP | 902229 | 902957 | - | 728  | 30 | 30 | 30 | 30 | 30 | 100% | 100% | 100% | 100% | P | P | P | P |   |
| b0865 | ybjP | 903175 | 903690 | - | 515  | 21 | 21 | 21 | 21 | 21 | 100% | 100% | 100% | 100% | P | P | P | P | U |
| b0868 | ybjS | 904963 | 905976 | - | 1013 | 40 | 36 | 36 | 36 | 36 | 90%  | 90%  | 90%  | 90%  | P | P | P | P | U |
| b0869 | ybjT | 906075 | 907505 | - | 1430 | 57 | 56 | 56 | 56 | 56 | 98%  | 98%  | 98%  | 98%  | P | P | P | P | U |
| b0870 | ltaE | 907516 | 908517 | - | 1001 | 40 | 40 | 40 | 40 | 40 | 100% | 100% | 100% | 100% | P | P | P | P |   |
| b0871 | poxB | 908554 | 910272 | - | 1718 | 69 | 69 | 69 | 69 | 69 | 100% | 100% | 100% | 100% | P | P | P | P |   |
| b0872 | hcr  | 910405 | 911373 | - | 968  | 39 | 0  | 22 | 22 | 22 | 0%   | 56%  | 56%  | 56%  | A | P | P | P |   |
| b0873 | hcp  | 911385 | 913037 | - | 1652 | 66 | 0  | 9  | 12 | 12 | 0%   | 14%  | 18%  | 18%  | A | P | P | P |   |
| b0874 | ybjE | 913181 | 914080 | - | 899  | 36 | 34 | 34 | 34 | 34 | 94%  | 94%  | 94%  | 94%  | P | P | P | P | U |
| b0875 | aqpZ | 914575 | 915270 | - | 695  | 28 | 6  | 6  | 18 | 18 | 21%  | 21%  | 64%  | 64%  | P | P | P | P |   |
| b0877 | ybjX | 917351 | 918343 | - | 992  | 40 | 39 | 39 | 39 | 39 | 98%  | 98%  | 98%  | 98%  | P | P | P | P | U |
| b0880 | cspD | 921589 | 921813 | - | 224  | 9  | 9  | 9  | 9  | 9  | 100% | 100% | 100% | 100% | P | P | P | P |   |
| b0883 | serW | 925107 | 925194 | - | 87   | 3  | 3  | 3  | 3  | 3  | 100% | 100% | 100% | 100% | P | P | P | P |   |
| b0884 | infA | 925448 | 925666 | - | 218  | 9  | 9  | 9  | 9  | 9  | 100% | 100% | 100% | 100% | P | P | P | P |   |
| b0885 | aat  | 925951 | 926655 | - | 704  | 28 | 28 | 28 | 28 | 28 | 100% | 100% | 100% | 100% | P | P | P | P |   |
| b0886 | cydC | 926697 | 928418 | - | 1721 | 69 | 69 | 69 | 69 | 69 | 100% | 100% | 100% | 100% | P | P | P | P |   |
| b0887 | cydD | 928419 | 930185 | - | 1766 | 71 | 69 | 69 | 69 | 69 | 97%  | 97%  | 97%  | 97%  | P | P | P | P |   |
| b0888 | trxB | 930308 | 931273 | - | 965  | 39 | 39 | 39 | 39 | 39 | 100% | 100% | 100% | 100% | P | P | P | P |   |
| b0897 | ycaC | 944154 | 944780 | - | 626  | 25 | 24 | 24 | 24 | 25 | 96%  | 96%  | 96%  | 100% | P | P | P | P | U |
| b0900 | ycaN | 947883 | 948791 | - | 908  | 37 | 6  | 6  | 8  | 12 | 16%  | 16%  | 22%  | 32%  | P | P | P | P | U |
| b0902 | pflA | 949563 | 950303 | - | 740  | 29 | 29 | 29 | 29 | 29 | 100% | 100% | 100% | 100% | P | P | P | P |   |
| b0903 | pflB | 950495 | 952777 | - | 2282 | 91 | 90 | 90 | 91 | 91 | 99%  | 99%  | 100% | 100% | P | P | P | P |   |
| b0904 | focA | 952832 | 953689 | - | 857  | 35 | 35 | 35 | 35 | 35 | 100% | 100% | 100% | 100% | P | P | P | P |   |
| b0905 | ycaO | 954095 | 955855 | - | 1760 | 70 | 66 | 66 | 66 | 66 | 94%  | 94%  | 94%  | 94%  | P | P | P | P | U |
| b0920 | ycbC | 971845 | 972624 | - | 779  | 31 | 15 | 15 | 16 | 16 | 48%  | 48%  | 52%  | 52%  | P | P | P | P | U |
| b0928 | aspC | 983742 | 984932 | - | 1190 | 47 | 47 | 47 | 47 | 47 | 100% | 100% | 100% | 100% | P | P | P | P |   |
| b0929 | ompF | 985117 | 986205 | - | 1088 | 43 | 43 | 43 | 43 | 43 | 100% | 100% | 100% | 100% | P | P | P | P |   |
| b0930 | asnS | 986808 | 988208 | - | 1400 | 56 | 56 | 56 | 56 | 56 | 100% | 100% | 100% | 100% | P | P | P | P |   |
| b0931 | pncB | 988377 | 989579 | - | 1202 | 48 | 48 | 48 | 48 | 48 | 100% | 100% | 100% | 100% | P | P | P | P |   |

|       |      |         |         |   |      |     |    |    |    |    |      |      |      |      |   |   |   |   |   |
|-------|------|---------|---------|---|------|-----|----|----|----|----|------|------|------|------|---|---|---|---|---|
| b0933 | ssuB | 992500  | 993267  | - | 767  | 31  | 0  | 2  | 10 | 10 | 0%   | 6%   | 32%  | 32%  | A | P | P | P |   |
| b0934 | ssuC | 993264  | 994055  | - | 791  | 32  | 0  | 1  | 3  | 3  | 0%   | 3%   | 9%   | 9%   | A | P | P | P |   |
| b0935 | ssuD | 994066  | 995211  | - | 1145 | 46  | 0  | 0  | 3  | 3  | 0%   | 0%   | 7%   | 7%   | A | A | P | P |   |
| b0936 | ssuA | 995208  | 996167  | - | 959  | 39  | 0  | 0  | 1  | 1  | 0%   | 0%   | 3%   | 3%   | A | A | P | P |   |
| b0937 | ssuE | 996160  | 996735  | - | 575  | 23  | 0  | 0  | 0  | 0  | 0%   | 0%   | 0%   | 0%   | A | A | A | A |   |
| b0947 | ycbX | 1005714 | 1006823 | - | 1109 | 45  | 35 | 35 | 36 | 36 | 78%  | 78%  | 80%  | 80%  | P | P | P | P | U |
| b0954 | fabA | 1015175 | 1015693 | - | 518  | 21  | 21 | 21 | 21 | 21 | 100% | 100% | 100% | 100% | P | P | P | P |   |
| b0955 | ycbZ | 1015762 | 1017522 | - | 1760 | 71  | 69 | 69 | 69 | 69 | 97%  | 97%  | 97%  | 97%  | P | P | P | P | U |
| b0957 | ompA | 1018236 | 1019276 | - | 1040 | 42  | 42 | 42 | 42 | 42 | 100% | 100% | 100% | 100% | P | P | P | P |   |
| b0958 | sulA | 1019633 | 1020142 | - | 509  | 20  | 20 | 20 | 20 | 20 | 100% | 100% | 100% | 100% | P | P | P | P |   |
| b0960 | yccS | 1020953 | 1023106 | - | 2153 | 86  | 76 | 76 | 76 | 76 | 88%  | 88%  | 88%  | 88%  | P | P | P | P | U |
| b0961 | yccF | 1023125 | 1023571 | - | 446  | 18  | 18 | 18 | 18 | 18 | 100% | 100% | 100% | 100% | P | P | P | P | U |
| b0963 | mgsA | 1025780 | 1026238 | - | 458  | 18  | 18 | 18 | 18 | 18 | 100% | 100% | 100% | 100% | P | P | P | P |   |
| b0964 | yccT | 1026334 | 1026996 | - | 662  | 27  | 4  | 14 | 19 | 19 | 15%  | 52%  | 70%  | 70%  | P | P | P | P | U |
| b0966 | hspQ | 1027627 | 1027944 | - | 317  | 13  | 13 | 13 | 13 | 13 | 100% | 100% | 100% | 100% | P | P | P | P |   |
| b0967 | yccW | 1028002 | 1029192 | - | 1190 | 48  | 48 | 48 | 48 | 48 | 100% | 100% | 100% | 100% | P | P | P | P | U |
| b0969 | yccK | 1029562 | 1029891 | - | 329  | 14  | 13 | 13 | 13 | 13 | 93%  | 93%  | 93%  | 93%  | P | P | P | P | U |
| b0970 | yccA | 1029982 | 1030641 | - | 659  | 27  | 27 | 27 | 27 | 27 | 100% | 100% | 100% | 100% | P | P | P | P |   |
| b0971 | serT | 1030848 | 1030935 | - | 87   | 3   | 3  | 3  | 3  | 3  | 100% | 100% | 100% | 100% | P | P | P | P |   |
| b0981 | etk  | 1041253 | 1043433 | - | 2180 | 87  | 23 | 24 | 29 | 29 | 26%  | 28%  | 33%  | 33%  | P | P | P | P |   |
| b0982 | etp  | 1043453 | 1043899 | - | 446  | 18  | 3  | 7  | 7  | 7  | 17%  | 39%  | 39%  | 39%  | P | P | P | P |   |
| b0983 | gfcE | 1043887 | 1045026 | - | 1139 | 46  | 5  | 10 | 10 | 11 | 11%  | 22%  | 22%  | 24%  | P | P | P | P | U |
| b0984 | gfcD | 1045072 | 1047168 | - | 2096 | 84  | 0  | 0  | 2  | 2  | 0%   | 0%   | 2%   | 2%   | A | A | P | P | U |
| b0985 | gfcC | 1047168 | 1047914 | - | 746  | 30  | 0  | 0  | 1  | 1  | 0%   | 0%   | 3%   | 3%   | A | A | P | P | U |
| b0986 | gfcB | 1047911 | 1048555 | - | 644  | 26  | 0  | 4  | 5  | 5  | 0%   | 15%  | 19%  | 19%  | A | P | P | P | U |
| b0987 | gfcA | 1048662 | 1048967 | - | 305  | 13  | 3  | 9  | 9  | 9  | 23%  | 69%  | 69%  | 69%  | P | P | P | P | U |
| b0989 | cspH | 1050186 | 1050398 | - | 212  | 9   | 0  | 0  | 1  | 1  | 0%   | 0%   | 11%  | 11%  | A | A | P | P | U |
| b0992 | yccM | 1051512 | 1052585 | - | 1073 | 43  | 0  | 0  | 2  | 2  | 0%   | 0%   | 5%   | 5%   | A | A | P | P | U |
| b0993 | torS | 1052657 | 1055401 | - | 2744 | 110 | 0  | 0  | 3  | 3  | 0%   | 0%   | 3%   | 3%   | A | A | P | P |   |
| b0995 | torR | 1056485 | 1057177 | - | 692  | 28  | 18 | 25 | 25 | 25 | 64%  | 89%  | 89%  | 89%  | P | P | P | P |   |
| b0999 | cbpM | 1061773 | 1062078 | - | 305  | 12  | 10 | 10 | 10 | 10 | 83%  | 83%  | 83%  | 83%  | P | P | P | P |   |
| b1000 | cbpA | 1062078 | 1062998 | - | 920  | 37  | 37 | 37 | 37 | 37 | 100% | 100% | 100% | 100% | P | P | P | P |   |
| b1003 | yccJ | 1066087 | 1066314 | - | 227  | 10  | 10 | 10 | 10 | 10 | 100% | 100% | 100% | 100% | P | P | P | P | U |
| b1004 | wrbA | 1066335 | 1066931 | - | 596  | 24  | 24 | 24 | 24 | 24 | 100% | 100% | 100% | 100% | P | P | P | P |   |
| b1006 | rutG | 1067734 | 1069062 | - | 1328 | 54  | 0  | 3  | 17 | 54 | 0%   | 6%   | 31%  | 100% | A | P | P | P | U |
| b1007 | rutF | 1069083 | 1069577 | - | 494  | 20  | 0  | 0  | 1  | 20 | 0%   | 0%   | 5%   | 100% | A | A | P | P | U |
| b1008 | rutE | 1069588 | 1070178 | - | 590  | 23  | 0  | 0  | 0  | 23 | 0%   | 0%   | 0%   | 100% | A | A | A | P | U |
| b1009 | rutD | 1070188 | 1070988 | - | 800  | 32  | 0  | 0  | 1  | 32 | 0%   | 0%   | 3%   | 100% | A | A | P | P | U |
| b1010 | rutC | 1070996 | 1071382 | - | 386  | 15  | 0  | 0  | 0  | 15 | 0%   | 0%   | 0%   | 100% | A | A | A | P | U |
| b1011 | rutB | 1071394 | 1072086 | - | 692  | 27  | 0  | 0  | 3  | 27 | 0%   | 0%   | 11%  | 100% | A | A | P | P | U |
| b1012 | rutA | 1072086 | 1073234 | - | 1148 | 46  | 0  | 0  | 3  | 46 | 0%   | 0%   | 7%   | 100% | A | A | P | P | U |
| b1014 | putA | 1074143 | 1078105 | - | 3962 | 158 | 94 | 94 | 96 | 99 | 59%  | 59%  | 61%  | 63%  | P | P | P | P |   |
| b1021 | pgaD | 1085329 | 1085742 | - | 413  | 17  | 0  | 15 | 15 | 15 | 0%   | 88%  | 88%  | 88%  | A | P | P | P | U |
| b1022 | pgaC | 1085744 | 1087069 | - | 1325 | 53  | 0  | 15 | 15 | 16 | 0%   | 28%  | 28%  | 30%  | A | P | P | P | U |
| b1023 | pgaB | 1087062 | 1089080 | - | 2018 | 81  | 0  | 0  | 0  | 0  | 0%   | 0%   | 0%   | 0%   | A | A | A | A | U |
| b1024 | pgaA | 1089089 | 1091512 | - | 2423 | 97  | 0  | 0  | 0  | 0  | 0%   | 0%   | 0%   | 0%   | A | A | A | A | U |

|       |      |         |         |   |      |     |     |     |     |     |      |      |      |      |   |   |   |   |   |
|-------|------|---------|---------|---|------|-----|-----|-----|-----|-----|------|------|------|------|---|---|---|---|---|
| b1026 | insF | 1093498 | 1094364 | - | 866  | 35  | 32  | 32  | 32  | 32  | 91%  | 91%  | 91%  | 91%  | P | P | P | P |   |
| b1027 | insE | 1094361 | 1094669 | - | 308  | 13  | 13  | 13  | 13  | 13  | 100% | 100% | 100% | 100% | P | P | P | P |   |
| b1032 | serX | 1096788 | 1096875 | - | 87   | 3   | 3   | 3   | 3   | 3   | 100% | 100% | 100% | 100% | P | P | P | P |   |
| b1037 | csgG | 1100074 | 1100907 | - | 833  | 33  | 22  | 22  | 22  | 22  | 67%  | 67%  | 67%  | 67%  | P | P | P | P |   |
| b1038 | csgF | 1100934 | 1101350 | - | 416  | 17  | 9   | 9   | 9   | 9   | 53%  | 53%  | 53%  | 53%  | P | P | P | P | U |
| b1039 | csgE | 1101375 | 1101764 | - | 389  | 16  | 3   | 4   | 4   | 4   | 19%  | 25%  | 25%  | 25%  | P | P | P | P | U |
| b1040 | csgD | 1101769 | 1102419 | - | 650  | 26  | 19  | 22  | 22  | 22  | 73%  | 85%  | 85%  | 85%  | P | P | P | P |   |
| b1047 | mdoC | 1107007 | 1108164 | - | 1157 | 46  | 16  | 16  | 18  | 18  | 35%  | 35%  | 39%  | 39%  | P | P | P | P |   |
| b1051 | msyB | 1113030 | 1113404 | - | 374  | 15  | 15  | 15  | 15  | 15  | 100% | 100% | 100% | 100% | P | P | P | P | U |
| b1053 | mdtG | 1113487 | 1114713 | - | 1226 | 49  | 0   | 5   | 5   | 5   | 0%   | 10%  | 10%  | 10%  | A | P | P | P | U |
| b1054 | lpxL | 1114885 | 1115805 | - | 920  | 37  | 37  | 37  | 37  | 37  | 100% | 100% | 100% | 100% | P | P | P | P |   |
| b1056 | yceI | 1117124 | 1117699 | - | 575  | 23  | 21  | 21  | 21  | 23  | 91%  | 91%  | 91%  | 100% | P | P | P | P | U |
| b1057 | yceJ | 1117703 | 1118269 | - | 566  | 23  | 8   | 8   | 8   | 8   | 35%  | 35%  | 35%  | 35%  | P | P | P | P | U |
| b1058 | yceO | 1118530 | 1118670 | - | 140  | 6   | 0   | 0   | 0   | 0   | 0%   | 0%   | 0%   | 0%   | A | A | A | A | U |
| b1059 | solA | 1118691 | 1119809 | - | 1118 | 44  | 42  | 42  | 42  | 42  | 95%  | 95%  | 95%  | 95%  | P | P | P | P |   |
| b1060 | bssS | 1119924 | 1120178 | - | 254  | 10  | 10  | 10  | 10  | 10  | 100% | 100% | 100% | 100% | P | P | P | P | U |
| b1061 | dinI | 1120465 | 1120710 | - | 245  | 10  | 10  | 10  | 10  | 10  | 100% | 100% | 100% | 100% | P | P | P | P |   |
| b1062 | pyrC | 1120784 | 1121830 | - | 1046 | 42  | 42  | 42  | 42  | 42  | 100% | 100% | 100% | 100% | P | P | P | P |   |
| b1063 | yceB | 1121936 | 1122496 | - | 560  | 22  | 17  | 17  | 17  | 17  | 77%  | 77%  | 77%  | 77%  | P | P | P | P | U |
| b1064 | grxB | 1122630 | 1123277 | - | 647  | 26  | 26  | 26  | 26  | 26  | 100% | 100% | 100% | 100% | P | P | P | P |   |
| b1065 | mdtH | 1123341 | 1124549 | - | 1208 | 49  | 0   | 2   | 2   | 2   | 0%   | 4%   | 4%   | 4%   | A | P | P | P | U |
| b1070 | flgN | 1128637 | 1129053 | - | 416  | 17  | 2   | 3   | 3   | 3   | 12%  | 18%  | 18%  | 18%  | P | P | P | P |   |
| b1071 | flgM | 1129058 | 1129351 | - | 293  | 12  | 9   | 9   | 9   | 9   | 75%  | 75%  | 75%  | 75%  | P | P | P | P |   |
| b1072 | flgA | 1129427 | 1130086 | - | 659  | 26  | 0   | 1   | 1   | 1   | 0%   | 4%   | 4%   | 4%   | A | P | P | P |   |
| b1084 | rne  | 1140405 | 1143590 | - | 3185 | 127 | 127 | 127 | 127 | 127 | 100% | 100% | 100% | 100% | P | P | P | P |   |
| b1087 | yceF | 1145234 | 1145818 | - | 584  | 23  | 23  | 23  | 23  | 23  | 100% | 100% | 100% | 100% | P | P | P | P | U |
| b1102 | fhuE | 1158585 | 1160774 | - | 2189 | 87  | 0   | 1   | 1   | 74  | 0%   | 1%   | 1%   | 85%  | A | P | P | P |   |
| b1111 | ycfQ | 1167423 | 1168055 | - | 632  | 26  | 21  | 23  | 23  | 23  | 81%  | 88%  | 88%  | 88%  | P | P | P | P | U |
| b1113 | ycfS | 1168635 | 1169597 | - | 962  | 38  | 27  | 34  | 34  | 34  | 71%  | 89%  | 89%  | 89%  | P | P | P | P | U |
| b1114 | mfd  | 1169741 | 1173187 | - | 3446 | 138 | 137 | 137 | 137 | 137 | 99%  | 99%  | 99%  | 99%  | P | P | P | P |   |
| b1115 | ycfT | 1173315 | 1174388 | - | 1073 | 43  | 0   | 0   | 4   | 4   | 0%   | 0%   | 9%   | 9%   | A | A | P | P | U |
| b1121 | ycfZ | 1179702 | 1180490 | - | 788  | 32  | 0   | 0   | 0   | 0   | 0%   | 0%   | 0%   | 0%   | A | A | A | A | U |
| b1122 | ymfA | 1180487 | 1180948 | - | 461  | 18  | 0   | 0   | 0   | 0   | 0%   | 0%   | 0%   | 0%   | A | A | A | A | U |
| b1123 | potD | 1181006 | 1182052 | - | 1046 | 42  | 42  | 42  | 42  | 42  | 100% | 100% | 100% | 100% | P | P | P | P |   |
| b1124 | potC | 1182049 | 1182843 | - | 794  | 32  | 31  | 31  | 31  | 31  | 97%  | 97%  | 97%  | 97%  | P | P | P | P |   |
| b1125 | potB | 1182840 | 1183667 | - | 827  | 33  | 33  | 33  | 33  | 33  | 100% | 100% | 100% | 100% | P | P | P | P |   |
| b1126 | potA | 1183681 | 1184817 | - | 1136 | 46  | 46  | 46  | 46  | 46  | 100% | 100% | 100% | 100% | P | P | P | P |   |
| b1128 | ycfD | 1186342 | 1187463 | - | 1121 | 45  | 45  | 45  | 45  | 45  | 100% | 100% | 100% | 100% | P | P | P | P | U |
| b1129 | phoQ | 1187539 | 1188999 | - | 1460 | 58  | 58  | 58  | 58  | 58  | 100% | 100% | 100% | 100% | P | P | P | P |   |
| b1130 | phoP | 1188999 | 1189670 | - | 671  | 27  | 27  | 27  | 27  | 27  | 100% | 100% | 100% | 100% | P | P | P | P |   |
| b1131 | purB | 1189839 | 1191209 | - | 1370 | 55  | 55  | 55  | 55  | 55  | 100% | 100% | 100% | 100% | P | P | P | P |   |
| b1132 | hflD | 1191213 | 1191854 | - | 641  | 26  | 26  | 26  | 26  | 26  | 100% | 100% | 100% | 100% | P | P | P | P | U |
| b1133 | mnmA | 1191890 | 1192996 | - | 1106 | 45  | 45  | 45  | 45  | 45  | 100% | 100% | 100% | 100% | P | P | P | P |   |
| b1134 | nudJ | 1193050 | 1193511 | - | 461  | 18  | 15  | 15  | 15  | 15  | 83%  | 83%  | 83%  | 83%  | P | P | P | P |   |
| b1135 | rluE | 1193521 | 1194174 | - | 653  | 26  | 24  | 24  | 24  | 24  | 92%  | 92%  | 92%  | 92%  | P | P | P | P |   |
| b1137 | ymfD | 1196090 | 1196755 | - | 665  | 27  | 0   | 0   | 0   | 0   | 0%   | 0%   | 0%   | 0%   | A | A | A | A | U |

|       |      |         |         |   |      |     |    |    |    |    |      |      |      |      |   |   |   |   |   |
|-------|------|---------|---------|---|------|-----|----|----|----|----|------|------|------|------|---|---|---|---|---|
| b1138 | ymfE | 1196756 | 1197460 | - | 704  | 28  | 0  | 0  | 0  | 0  | 0%   | 0%   | 0%   | 0%   | A | A | A | A | U |
| b1140 | intE | 1198902 | 1200029 | - | 1127 | 45  | 0  | 4  | 6  | 7  | 0%   | 9%   | 13%  | 16%  | A | P | P | P | U |
| b1141 | xisE | 1200010 | 1200255 | - | 245  | 10  | 0  | 2  | 2  | 2  | 0%   | 20%  | 20%  | 20%  | A | P | P | P | U |
| b1144 | ymfJ | 1200999 | 1201307 | - | 308  | 13  | 0  | 3  | 3  | 3  | 0%   | 23%  | 23%  | 23%  | A | P | P | P | U |
| b1145 | ymfK | 1201482 | 1202156 | - | 674  | 27  | 22 | 22 | 22 | 22 | 81%  | 81%  | 81%  | 81%  | P | P | P | P |   |
| b1156 | tfaE | 1207740 | 1208342 | - | 602  | 24  | 0  | 0  | 8  | 8  | 0%   | 0%   | 33%  | 33%  | A | A | P | P | U |
| b1157 | stfE | 1208342 | 1208842 | - | 500  | 20  | 0  | 0  | 0  | 0  | 0%   | 0%   | 0%   | 0%   | A | A | A | A | U |
| b1160 | elbA | 1210903 | 1211226 | - | 323  | 13  | 0  | 0  | 0  | 0  | 0%   | 0%   | 0%   | 0%   | A | A | A | A | U |
| b1161 | ycgX | 1211926 | 1212330 | - | 404  | 16  | 0  | 0  | 0  | 0  | 0%   | 0%   | 0%   | 0%   | A | A | A | A | U |
| b1162 | ycgE | 1212551 | 1213282 | - | 731  | 29  | 28 | 28 | 28 | 28 | 97%  | 97%  | 97%  | 97%  | P | P | P | P | U |
| b1163 | ycgF | 1213487 | 1214698 | - | 1211 | 49  | 9  | 16 | 17 | 20 | 18%  | 33%  | 35%  | 41%  | P | P | P | P | U |
| b1171 | ymgD | 1221528 | 1221857 | - | 329  | 13  | 13 | 13 | 13 | 13 | 100% | 100% | 100% | 100% | P | P | P | P | U |
| b1172 | ymgG | 1221867 | 1222151 | - | 284  | 12  | 12 | 12 | 12 | 12 | 100% | 100% | 100% | 100% | P | P | P | P | U |
| b4593 | ymgI | 1222213 | 1222386 | - | 173  | 7   | 4  | 4  | 4  | 4  | 57%  | 57%  | 57%  | 57%  | P | P | P | P | U |
| b1174 | minE | 1223502 | 1223768 | - | 266  | 10  | 10 | 10 | 10 | 10 | 100% | 100% | 100% | 100% | P | P | P | P |   |
| b1175 | minD | 1223772 | 1224584 | - | 812  | 32  | 32 | 32 | 32 | 32 | 100% | 100% | 100% | 100% | P | P | P | P |   |
| b1176 | minC | 1224608 | 1225303 | - | 695  | 28  | 28 | 28 | 28 | 28 | 100% | 100% | 100% | 100% | P | P | P | P |   |
| b1178 | ycgK | 1226294 | 1226695 | - | 401  | 17  | 16 | 16 | 16 | 17 | 94%  | 94%  | 94%  | 100% | P | P | P | P | U |
| b1182 | hlyE | 1228706 | 1229617 | - | 911  | 36  | 0  | 1  | 1  | 8  | 0%   | 3%   | 3%   | 22%  | A | P | P | P |   |
| b1185 | dsbB | 1231723 | 1232253 | - | 530  | 21  | 18 | 18 | 18 | 18 | 86%  | 86%  | 86%  | 86%  | P | P | P | P |   |
| b1186 | nhaB | 1232399 | 1233940 | - | 1541 | 61  | 59 | 59 | 59 | 59 | 97%  | 97%  | 97%  | 97%  | P | P | P | P |   |
| b1188 | ycgB | 1234932 | 1236464 | - | 1532 | 61  | 55 | 55 | 61 | 61 | 90%  | 90%  | 100% | 100% | P | P | P | P | U |
| b1191 | cvrA | 1239558 | 1241294 | - | 1736 | 69  | 56 | 56 | 56 | 56 | 81%  | 81%  | 81%  | 81%  | P | P | P | P | U |
| b1192 | ldcA | 1241389 | 1242303 | - | 914  | 37  | 36 | 36 | 36 | 36 | 97%  | 97%  | 97%  | 97%  | P | P | P | P |   |
| b1194 | ycgR | 1243016 | 1243750 | - | 734  | 30  | 0  | 8  | 8  | 8  | 0%   | 27%  | 27%  | 27%  | A | P | P | P |   |
| b1197 | treA | 1244902 | 1246599 | - | 1697 | 68  | 64 | 64 | 65 | 66 | 94%  | 94%  | 96%  | 97%  | P | P | P | P |   |
| b1198 | dhaM | 1246919 | 1248340 | - | 1421 | 57  | 54 | 54 | 54 | 54 | 95%  | 95%  | 95%  | 95%  | P | P | P | P | U |
| b1199 | dhaL | 1248348 | 1248980 | - | 632  | 26  | 24 | 24 | 24 | 24 | 92%  | 92%  | 92%  | 92%  | P | P | P | P |   |
| b1200 | dhaK | 1248991 | 1250061 | - | 1070 | 43  | 43 | 43 | 43 | 43 | 100% | 100% | 100% | 100% | P | P | P | P |   |
| b1202 | ycgV | 1252308 | 1255175 | - | 2867 | 115 | 11 | 15 | 18 | 18 | 10%  | 13%  | 16%  | 16%  | P | P | P | P | U |
| b1203 | ychF | 1255944 | 1257035 | - | 1091 | 44  | 44 | 44 | 44 | 44 | 100% | 100% | 100% | 100% | P | P | P | P | U |
| b1204 | pth  | 1257152 | 1257736 | - | 584  | 23  | 23 | 23 | 23 | 23 | 100% | 100% | 100% | 100% | P | P | P | P |   |
| b1206 | ychM | 1258347 | 1260026 | - | 1679 | 68  | 10 | 10 | 10 | 11 | 15%  | 15%  | 15%  | 16%  | P | P | P | P | U |
| b1207 | prs  | 1260151 | 1261098 | - | 947  | 37  | 37 | 37 | 37 | 37 | 100% | 100% | 100% | 100% | P | P | P | P |   |
| b1208 | ispE | 1261249 | 1262100 | - | 851  | 35  | 35 | 35 | 35 | 35 | 100% | 100% | 100% | 100% | P | P | P | P |   |
| b1209 | lolB | 1262100 | 1262723 | - | 623  | 24  | 24 | 24 | 24 | 24 | 100% | 100% | 100% | 100% | P | P | P | P |   |
| b4419 | ldrA | 1268391 | 1268498 | - | 107  | 4   | 3  | 4  | 4  | 4  | 75%  | 100% | 100% | 100% | P | P | P | P |   |
| b4421 | ldrB | 1268926 | 1269033 | - | 107  | 4   | 4  | 4  | 4  | 4  | 100% | 100% | 100% | 100% | P | P | P | P |   |
| b4423 | ldrC | 1269461 | 1269568 | - | 107  | 4   | 3  | 4  | 4  | 4  | 75%  | 100% | 100% | 100% | P | P | P | P |   |
| b1216 | chaA | 1269972 | 1271072 | - | 1100 | 44  | 43 | 44 | 44 | 44 | 98%  | 100% | 100% | 100% | P | P | P | P |   |
| b1219 | ychN | 1272469 | 1272822 | - | 353  | 14  | 13 | 13 | 13 | 13 | 93%  | 93%  | 93%  | 93%  | P | P | P | P | U |
| b1221 | narL | 1274402 | 1275052 | - | 650  | 26  | 26 | 26 | 26 | 26 | 100% | 100% | 100% | 100% | P | P | P | P |   |
| b1222 | narX | 1275045 | 1276841 | - | 1796 | 72  | 37 | 50 | 51 | 51 | 51%  | 69%  | 71%  | 71%  | P | P | P | P |   |
| b4425 | rttR | 1286289 | 1286459 | - | 170  | 7   | 3  | 4  | 4  | 4  | 43%  | 57%  | 57%  | 57%  | P | P | P | P |   |
| b1229 | tpr  | 1286310 | 1286399 | - | 89   | 3   | 1  | 1  | 1  | 1  | 33%  | 33%  | 33%  | 33%  | P | P | P | P | U |
| b1230 | tyrV | 1286467 | 1286551 | - | 84   | 4   | 4  | 4  | 4  | 4  | 100% | 100% | 100% | 100% | P | P | P | P |   |

|       |      |         |         |   |      |     |     |     |     |     |      |      |      |      |   |   |   |   |   |
|-------|------|---------|---------|---|------|-----|-----|-----|-----|-----|------|------|------|------|---|---|---|---|---|
| b1231 | tyrT | 1286761 | 1286845 | - | 84   | 3   | 3   | 3   | 3   | 3   | 100% | 100% | 100% | 100% | P | P | P | P |   |
| b1232 | purU | 1287005 | 1287847 | - | 842  | 33  | 33  | 33  | 33  | 33  | 100% | 100% | 100% | 100% | P | P | P | P |   |
| b1233 | ychJ | 1287897 | 1288355 | - | 458  | 19  | 19  | 19  | 19  | 19  | 100% | 100% | 100% | 100% | P | P | P | P | U |
| b1237 | hns  | 1291732 | 1292145 | - | 413  | 16  | 16  | 16  | 16  | 16  | 100% | 100% | 100% | 100% | P | P | P | P |   |
| b4573 | insZ | 1293649 | 1294545 | - | 896  | 36  | 3   | 3   | 3   | 3   | 8%   | 8%   | 8%   | 8%   | P | P | P | P | U |
| b1241 | adhE | 1294669 | 1297344 | - | 2675 | 107 | 107 | 107 | 107 | 107 | 100% | 100% | 100% | 100% | P | P | P | P |   |
| b1248 | yciU | 1304845 | 1305174 | - | 329  | 13  | 13  | 13  | 13  | 13  | 100% | 100% | 100% | 100% | P | P | P | P | U |
| b1249 | cls  | 1305209 | 1306669 | - | 1460 | 58  | 58  | 58  | 58  | 58  | 100% | 100% | 100% | 100% | P | P | P | P |   |
| b1250 | kch  | 1307040 | 1308293 | - | 1253 | 50  | 37  | 37  | 37  | 44  | 74%  | 74%  | 74%  | 88%  | P | P | P | P |   |
| b1251 | yciI | 1308593 | 1308889 | - | 296  | 12  | 11  | 11  | 11  | 11  | 92%  | 92%  | 92%  | 92%  | P | P | P | P | U |
| b1253 | yciA | 1309872 | 1310270 | - | 398  | 16  | 16  | 16  | 16  | 16  | 100% | 100% | 100% | 100% | P | P | P | P | U |
| b1254 | yciB | 1310375 | 1310914 | - | 539  | 22  | 21  | 21  | 22  | 22  | 95%  | 95%  | 100% | 100% | P | P | P | P | U |
| b1255 | yciC | 1310944 | 1311687 | - | 743  | 30  | 29  | 29  | 29  | 29  | 97%  | 97%  | 97%  | 97%  | P | P | P | P | U |
| b1257 | yciE | 1312742 | 1313248 | - | 506  | 20  | 7   | 7   | 7   | 18  | 35%  | 35%  | 35%  | 90%  | P | P | P | P | U |
| b1258 | yciF | 1313294 | 1313794 | - | 500  | 20  | 17  | 17  | 17  | 20  | 85%  | 85%  | 85%  | 100% | P | P | P | P | U |
| b1259 | yciG | 1313880 | 1314059 | - | 179  | 7   | 7   | 7   | 7   | 7   | 100% | 100% | 100% | 100% | P | P | P | P | U |
| b1260 | trpA | 1314440 | 1315246 | - | 806  | 32  | 32  | 32  | 32  | 32  | 100% | 100% | 100% | 100% | P | P | P | P |   |
| b1261 | trpB | 1315246 | 1316439 | - | 1193 | 48  | 48  | 48  | 48  | 48  | 100% | 100% | 100% | 100% | P | P | P | P |   |
| b1262 | trpC | 1316451 | 1317809 | - | 1358 | 55  | 55  | 55  | 55  | 55  | 100% | 100% | 100% | 100% | P | P | P | P |   |
| b1263 | trpD | 1317813 | 1319408 | - | 1595 | 64  | 64  | 64  | 64  | 64  | 100% | 100% | 100% | 100% | P | P | P | P |   |
| b1264 | trpE | 1319408 | 1320970 | - | 1562 | 62  | 62  | 62  | 62  | 62  | 100% | 100% | 100% | 100% | P | P | P | P |   |
| b1265 | trpL | 1321062 | 1321106 | - | 44   | 2   | 2   | 2   | 2   | 2   | 100% | 100% | 100% | 100% | P | P | P | P |   |
| b1270 | btuR | 1325791 | 1326381 | - | 590  | 24  | 24  | 24  | 24  | 24  | 100% | 100% | 100% | 100% | P | P | P | P |   |
| b1271 | yciK | 1326378 | 1327136 | - | 758  | 30  | 30  | 30  | 30  | 30  | 100% | 100% | 100% | 100% | P | P | P | P | U |
| b1273 | yciN | 1328441 | 1328692 | - | 251  | 10  | 8   | 8   | 8   | 8   | 80%  | 80%  | 80%  | 80%  | P | P | P | P | U |
| b1277 | ribA | 1336594 | 1337184 | - | 590  | 23  | 23  | 23  | 23  | 23  | 100% | 100% | 100% | 100% | P | P | P | P |   |
| b1283 | osmB | 1341134 | 1341352 | - | 218  | 9   | 9   | 9   | 9   | 9   | 100% | 100% | 100% | 100% | P | P | P | P |   |
| b1284 | yciT | 1341621 | 1342370 | - | 749  | 30  | 23  | 23  | 23  | 23  | 77%  | 77%  | 77%  | 77%  | P | P | P | P | U |
| b4596 | yciZ | 1342460 | 1342633 | - | 173  | 7   | 7   | 7   | 7   | 7   | 100% | 100% | 100% | 100% | P | P | P | P | U |
| b1285 | gmr  | 1342781 | 1344766 | - | 1985 | 80  | 51  | 51  | 77  | 77  | 64%  | 64%  | 96%  | 96%  | P | P | P | P |   |
| b1286 | rnb  | 1345002 | 1346936 | - | 1934 | 77  | 77  | 77  | 77  | 77  | 100% | 100% | 100% | 100% | P | P | P | P |   |
| b1287 | yciW | 1347004 | 1348131 | - | 1127 | 45  | 45  | 45  | 45  | 45  | 100% | 100% | 100% | 100% | P | P | P | P | U |
| b1288 | fabI | 1348275 | 1349063 | - | 788  | 32  | 31  | 31  | 31  | 31  | 97%  | 97%  | 97%  | 97%  | P | P | P | P |   |
| b1289 | ycjD | 1349431 | 1349784 | - | 353  | 14  | 1   | 1   | 7   | 7   | 7%   | 7%   | 50%  | 50%  | P | P | P | P | U |
| b1290 | sapF | 1349852 | 1350658 | - | 806  | 32  | 27  | 27  | 29  | 29  | 84%  | 84%  | 91%  | 91%  | P | P | P | P | U |
| b1291 | sapD | 1350660 | 1351652 | - | 992  | 40  | 39  | 39  | 40  | 40  | 98%  | 98%  | 100% | 100% | P | P | P | P | U |
| b1292 | sapC | 1351652 | 1352542 | - | 890  | 36  | 13  | 13  | 33  | 33  | 36%  | 36%  | 92%  | 92%  | P | P | P | P | U |
| b1293 | sapB | 1352529 | 1353494 | - | 965  | 39  | 26  | 26  | 38  | 38  | 67%  | 67%  | 97%  | 97%  | P | P | P | P | U |
| b1294 | sapA | 1353491 | 1355134 | - | 1643 | 65  | 59  | 59  | 61  | 61  | 91%  | 91%  | 94%  | 94%  | P | P | P | P | U |
| b1295 | ymjA | 1355447 | 1355692 | - | 245  | 10  | 10  | 10  | 10  | 10  | 100% | 100% | 100% | 100% | P | P | P | P | U |
| b1296 | puuP | 1355826 | 1357211 | - | 1385 | 55  | 12  | 12  | 12  | 13  | 22%  | 22%  | 22%  | 24%  | P | P | P | P |   |
| b1297 | puuA | 1357514 | 1358932 | - | 1418 | 57  | 56  | 56  | 56  | 56  | 98%  | 98%  | 98%  | 98%  | P | P | P | P |   |
| b1303 | pspF | 1364959 | 1365936 | - | 977  | 39  | 12  | 12  | 12  | 12  | 31%  | 31%  | 31%  | 31%  | P | P | P | P |   |
| b1320 | ycjW | 1380987 | 1381985 | - | 998  | 40  | 20  | 20  | 20  | 20  | 50%  | 50%  | 50%  | 50%  | P | P | P | P | U |
| b1324 | tpx  | 1386329 | 1386835 | - | 506  | 20  | 20  | 20  | 20  | 20  | 100% | 100% | 100% | 100% | P | P | P | P |   |
| b1326 | mpaA | 1387894 | 1388682 | - | 788  | 31  | 28  | 28  | 28  | 28  | 90%  | 90%  | 90%  | 90%  | P | P | P | P |   |

|       |      |         |         |   |      |     |     |     |     |     |      |      |      |      |   |   |   |   |   |
|-------|------|---------|---------|---|------|-----|-----|-----|-----|-----|------|------|------|------|---|---|---|---|---|
| b4525 | ymjC | 1388749 | 1388886 | - | 137  | 5   | 1   | 1   | 1   | 1   | 20%  | 20%  | 20%  | 20%  | P | P | P | P | U |
| b1327 | ycjY | 1388957 | 1389889 | - | 932  | 37  | 0   | 2   | 2   | 3   | 0%   | 5%   | 5%   | 8%   | A | P | P | P | U |
| b1330 | ynaI | 1392915 | 1393946 | - | 1031 | 42  | 34  | 34  | 34  | 34  | 81%  | 81%  | 81%  | 81%  | P | P | P | P | U |
| b1333 | uspE | 1395696 | 1396646 | - | 950  | 38  | 38  | 38  | 38  | 38  | 100% | 100% | 100% | 100% | P | P | P | P |   |
| b1334 | fnr  | 1396798 | 1397550 | - | 752  | 30  | 30  | 30  | 30  | 30  | 100% | 100% | 100% | 100% | P | P | P | P |   |
| b1335 | ogt  | 1397745 | 1398260 | - | 515  | 20  | 13  | 13  | 13  | 16  | 65%  | 65%  | 65%  | 80%  | P | P | P | P |   |
| b1336 | abgT | 1398271 | 1399797 | - | 1526 | 61  | 0   | 1   | 1   | 1   | 0%   | 2%   | 2%   | 2%   | A | P | P | P | U |
| b1337 | abgB | 1399834 | 1401279 | - | 1445 | 58  | 0   | 2   | 5   | 5   | 0%   | 3%   | 9%   | 9%   | A | P | P | P | U |
| b1338 | abgA | 1401279 | 1402589 | - | 1310 | 52  | 0   | 0   | 5   | 6   | 0%   | 0%   | 10%  | 12%  | A | A | P | P | U |
| b4426 | isrA | 1403676 | 1403833 | - | 157  | 6   | 3   | 3   | 4   | 4   | 50%  | 50%  | 67%  | 67%  | P | P | P | P | U |
| b1341 | ydaM | 1404587 | 1405819 | - | 1232 | 50  | 44  | 46  | 46  | 46  | 88%  | 92%  | 92%  | 92%  | P | P | P | P | U |
| b1344 | ttcA | 1409037 | 1409972 | - | 935  | 38  | 38  | 38  | 38  | 38  | 100% | 100% | 100% | 100% | P | P | P | P | U |
| b1345 | intR | 1410024 | 1411259 | - | 1235 | 49  | 6   | 12  | 17  | 17  | 12%  | 24%  | 35%  | 35%  | P | P | P | P |   |
| b1346 | ydaQ | 1411261 | 1411476 | - | 215  | 9   | 0   | 0   | 1   | 1   | 0%   | 0%   | 11%  | 11%  | A | A | P | P | U |
| b1347 | ydaC | 1411555 | 1411764 | - | 209  | 8   | 0   | 0   | 0   | 0   | 0%   | 0%   | 0%   | 0%   | A | A | A | A | U |
| b1348 | lar  | 1411757 | 1411951 | - | 194  | 8   | 0   | 1   | 2   | 2   | 0%   | 13%  | 25%  | 25%  | A | P | P | P |   |
| b1349 | recT | 1412008 | 1412817 | - | 809  | 32  | 0   | 3   | 3   | 5   | 0%   | 9%   | 9%   | 16%  | A | P | P | P |   |
| b1350 | recE | 1412810 | 1415410 | - | 2600 | 104 | 0   | 1   | 6   | 6   | 0%   | 1%   | 6%   | 6%   | A | P | P | P |   |
| b1351 | racC | 1415512 | 1415787 | - | 275  | 11  | 0   | 0   | 0   | 0   | 0%   | 0%   | 0%   | 0%   | A | A | A | A | U |
| b4526 | ydaE | 1415862 | 1416032 | - | 170  | 7   | 0   | 0   | 0   | 0   | 0%   | 0%   | 0%   | 0%   | A | A | A | A | U |
| b1352 | kilR | 1416032 | 1416253 | - | 221  | 9   | 0   | 0   | 0   | 0   | 0%   | 0%   | 0%   | 0%   | A | A | A | A |   |
| b4527 | ydaF | 1417180 | 1417335 | - | 155  | 6   | 0   | 0   | 0   | 0   | 0%   | 0%   | 0%   | 0%   | A | A | A | A | U |
| b1355 | ydaG | 1417346 | 1417480 | - | 134  | 5   | 0   | 0   | 0   | 0   | 0%   | 0%   | 0%   | 0%   | A | A | A | A | U |
| b1356 | racR | 1417789 | 1418265 | - | 476  | 19  | 18  | 18  | 18  | 18  | 95%  | 95%  | 95%  | 95%  | P | P | P | P | U |
| b1370 | insH | 1425770 | 1426750 | - | 980  | 39  | 37  | 37  | 37  | 37  | 95%  | 95%  | 95%  | 95%  | P | P | P | P |   |
| b1374 | pinR | 1431108 | 1431698 | - | 590  | 24  | 0   | 1   | 1   | 1   | 0%   | 4%   | 4%   | 4%   | A | P | P | P | U |
| b1375 | ynaE | 1432015 | 1432281 | - | 266  | 10  | 0   | 2   | 2   | 2   | 0%   | 20%  | 20%  | 20%  | A | P | P | P | U |
| b4638 | ttcC | 1432982 | 1433032 | - | 50   | 2   | 0   | 0   | 0   | 0   | 0%   | 0%   | 0%   | 0%   | A | A | A | A | U |
| b1376 | uspF | 1433209 | 1433643 | - | 434  | 18  | 17  | 17  | 18  | 18  | 94%  | 94%  | 100% | 100% | P | P | P | P |   |
| b1377 | ompN | 1433784 | 1434917 | - | 1133 | 46  | 0   | 1   | 1   | 1   | 0%   | 2%   | 2%   | 2%   | A | P | P | P |   |
| b1378 | ydbK | 1435284 | 1438808 | - | 3524 | 141 | 135 | 135 | 140 | 140 | 96%  | 96%  | 99%  | 99%  | P | P | P | P | U |
| b1379 | hslJ | 1439345 | 1439767 | - | 422  | 17  | 14  | 15  | 17  | 17  | 82%  | 88%  | 100% | 100% | P | P | P | P |   |
| b1380 | ldhA | 1439878 | 1440867 | - | 989  | 40  | 39  | 40  | 40  | 40  | 98%  | 100% | 100% | 100% | P | P | P | P |   |
| b1384 | feaR | 1444402 | 1445307 | - | 905  | 36  | 5   | 5   | 6   | 9   | 14%  | 14%  | 17%  | 25%  | P | P | P | P |   |
| b1386 | tynA | 1447100 | 1449373 | - | 2273 | 91  | 0   | 1   | 4   | 4   | 0%   | 1%   | 4%   | 4%   | A | P | P | P |   |
| b1387 | maoC | 1449621 | 1451666 | - | 2045 | 82  | 0   | 0   | 6   | 6   | 0%   | 0%   | 7%   | 7%   | A | A | P | P |   |
| b1402 | insD | 1465945 | 1466850 | - | 905  | 36  | 36  | 36  | 36  | 36  | 100% | 100% | 100% | 100% | P | P | P | P |   |
| b1403 | insC | 1466808 | 1467173 | - | 365  | 15  | 15  | 15  | 15  | 15  | 100% | 100% | 100% | 100% | P | P | P | P |   |
| b1412 | azoR | 1480279 | 1480884 | - | 605  | 24  | 22  | 22  | 22  | 22  | 92%  | 92%  | 92%  | 92%  | P | P | P | P |   |
| b4493 | gapC | 1487737 | 1488737 | - | 1000 | 40  | 40  | 40  | 40  | 40  | 100% | 100% | 100% | 100% | P | P | P | P | U |
| b4597 | rydC | 1489467 | 1489530 | - | 63   | 3   | 0   | 0   | 0   | 0   | 0%   | 0%   | 0%   | 0%   | A | A | A | A |   |
| b4428 | hokB | 1489946 | 1490095 | - | 149  | 6   | 6   | 6   | 6   | 6   | 100% | 100% | 100% | 100% | P | P | P | P |   |
| b1420 | mokB | 1489986 | 1490153 | - | 167  | 7   | 7   | 7   | 7   | 7   | 100% | 100% | 100% | 100% | P | P | P | P |   |
| b1422 | ydcI | 1492172 | 1493095 | - | 923  | 37  | 37  | 37  | 37  | 37  | 100% | 100% | 100% | 100% | P | P | P | P | U |
| b1428 | ydcK | 1497493 | 1498473 | - | 980  | 39  | 20  | 20  | 36  | 36  | 51%  | 51%  | 92%  | 92%  | P | P | P | P | U |
| b4578 | yncK | 1501167 | 1501658 | - | 491  | 20  | 0   | 0   | 0   | 0   | 0%   | 0%   | 0%   | 0%   | A | A | A | A | U |

|       |      |         |         |   |      |     |    |    |    |    |      |      |      |      |   |   |   |   |   |
|-------|------|---------|---------|---|------|-----|----|----|----|----|------|------|------|------|---|---|---|---|---|
| b1433 | ydcO | 1502929 | 1504104 | - | 1175 | 47  | 0  | 1  | 3  | 3  | 0%   | 2%   | 6%   | 6%   | A | P | P | P | U |
| b1436 | yncJ | 1506858 | 1507088 | - | 230  | 9   | 0  | 8  | 8  | 8  | 0%   | 89%  | 89%  | 89%  | A | P | P | P | U |
| b4598 | yncL | 1515123 | 1515218 | - | 95   | 4   | 4  | 4  | 4  | 4  | 100% | 100% | 100% | 100% | P | P | P | P | U |
| b1447 | ydcZ | 1515906 | 1516355 | - | 449  | 18  | 9  | 9  | 9  | 10 | 50%  | 50%  | 50%  | 56%  | P | P | P | P | U |
| b1448 | yncA | 1516352 | 1516870 | - | 518  | 20  | 20 | 20 | 20 | 20 | 100% | 100% | 100% | 100% | P | P | P | P | U |
| b1451 | yncD | 1518987 | 1521089 | - | 2102 | 84  | 56 | 57 | 57 | 57 | 67%  | 68%  | 68%  | 68%  | P | P | P | P | U |
| b1453 | ansP | 1522505 | 1524004 | - | 1499 | 60  | 9  | 9  | 11 | 11 | 15%  | 15%  | 18%  | 18%  | P | P | P | P |   |
| b1462 | yddH | 1531306 | 1531875 | - | 569  | 23  | 4  | 4  | 7  | 14 | 17%  | 17%  | 30%  | 61%  | P | P | P | P | U |
| b1464 | yddE | 1532989 | 1533882 | - | 893  | 36  | 32 | 32 | 32 | 32 | 89%  | 89%  | 89%  | 89%  | P | P | P | P | U |
| b1465 | narV | 1533961 | 1534641 | - | 680  | 27  | 0  | 0  | 2  | 2  | 0%   | 0%   | 7%   | 7%   | A | A | P | P |   |
| b1466 | narW | 1534638 | 1535333 | - | 695  | 28  | 0  | 2  | 2  | 2  | 0%   | 7%   | 7%   | 7%   | A | P | P | P |   |
| b1467 | narY | 1535333 | 1536877 | - | 1544 | 61  | 0  | 0  | 3  | 3  | 0%   | 0%   | 5%   | 5%   | A | A | P | P |   |
| b1468 | narZ | 1536874 | 1540614 | - | 3740 | 150 | 0  | 0  | 9  | 13 | 0%   | 0%   | 6%   | 9%   | A | A | P | P |   |
| b1469 | narU | 1540696 | 1542084 | - | 1388 | 56  | 0  | 0  | 2  | 7  | 0%   | 0%   | 4%   | 13%  | A | A | P | P |   |
| b1470 | yddJ | 1542408 | 1542743 | - | 335  | 13  | 0  | 0  | 0  | 0  | 0%   | 0%   | 0%   | 0%   | A | A | A | A | U |
| b1471 | yddK | 1542782 | 1543771 | - | 989  | 39  | 0  | 0  | 0  | 0  | 0%   | 0%   | 0%   | 0%   | A | A | A | A | U |
| b1472 | yddL | 1543774 | 1544052 | - | 278  | 11  | 0  | 0  | 0  | 0  | 0%   | 0%   | 0%   | 0%   | A | A | A | A | U |
| b1473 | yddG | 1544312 | 1545193 | - | 881  | 36  | 24 | 24 | 24 | 24 | 67%  | 67%  | 67%  | 67%  | P | P | P | P | U |
| b1477 | yddM | 1550422 | 1550706 | - | 284  | 11  | 9  | 11 | 11 | 11 | 82%  | 100% | 100% | 100% | P | P | P | P | U |
| b1478 | adhP | 1550852 | 1551862 | - | 1010 | 40  | 38 | 38 | 39 | 39 | 95%  | 95%  | 98%  | 98%  | P | P | P | P |   |
| b1479 | maeA | 1551996 | 1553693 | - | 1697 | 68  | 68 | 68 | 68 | 68 | 100% | 100% | 100% | 100% | P | P | P | P |   |
| b1480 | sra  | 1553850 | 1553987 | - | 137  | 5   | 5  | 5  | 5  | 5  | 100% | 100% | 100% | 100% | P | P | P | P |   |
| b1481 | bdm  | 1554089 | 1554304 | - | 215  | 9   | 5  | 5  | 5  | 6  | 56%  | 56%  | 56%  | 67%  | P | P | P | P |   |
| b1483 | ddpF | 1555136 | 1556062 | - | 926  | 37  | 0  | 0  | 1  | 35 | 0%   | 0%   | 3%   | 95%  | A | A | P | P |   |
| b1484 | ddpD | 1556055 | 1557041 | - | 986  | 39  | 0  | 0  | 1  | 39 | 0%   | 0%   | 3%   | 100% | A | A | P | P |   |
| b1485 | ddpC | 1557038 | 1557934 | - | 896  | 36  | 0  | 0  | 1  | 36 | 0%   | 0%   | 3%   | 100% | A | A | P | P |   |
| b1486 | ddpB | 1557931 | 1558953 | - | 1022 | 41  | 0  | 0  | 2  | 41 | 0%   | 0%   | 5%   | 100% | A | A | P | P |   |
| b1487 | ddpA | 1558955 | 1560505 | - | 1550 | 62  | 0  | 0  | 0  | 62 | 0%   | 0%   | 0%   | 100% | A | A | A | P |   |
| b1488 | ddpX | 1560519 | 1561100 | - | 581  | 23  | 0  | 0  | 0  | 23 | 0%   | 0%   | 0%   | 100% | A | A | A | P |   |
| b1489 | dos  | 1561358 | 1563757 | - | 2399 | 96  | 14 | 14 | 25 | 45 | 15%  | 15%  | 26%  | 47%  | P | P | P | P |   |
| b1490 | yddV | 1563782 | 1565164 | - | 1382 | 55  | 41 | 41 | 54 | 54 | 75%  | 75%  | 98%  | 98%  | P | P | P | P | U |
| b1491 | yddW | 1565528 | 1566847 | - | 1319 | 53  | 49 | 49 | 49 | 49 | 92%  | 92%  | 92%  | 92%  | P | P | P | P | U |
| b1492 | gadC | 1566978 | 1568513 | - | 1535 | 61  | 59 | 59 | 61 | 61 | 97%  | 97%  | 100% | 100% | P | P | P | P | U |
| b1493 | gadB | 1568669 | 1570069 | - | 1400 | 56  | 56 | 56 | 56 | 56 | 100% | 100% | 100% | 100% | P | P | P | P |   |
| b1494 | pqqL | 1570431 | 1573226 | - | 2795 | 112 | 0  | 6  | 7  | 10 | 0%   | 5%   | 6%   | 9%   | A | P | P | P | U |
| b1495 | yddB | 1573271 | 1575643 | - | 2372 | 95  | 0  | 0  | 0  | 0  | 0%   | 0%   | 0%   | 0%   | A | A | A | A | U |
| b1496 | yddA | 1575681 | 1577366 | - | 1685 | 68  | 0  | 0  | 0  | 0  | 0%   | 0%   | 0%   | 0%   | A | A | A | A | U |
| b1497 | ydeM | 1577657 | 1578814 | - | 1157 | 47  | 0  | 0  | 0  | 0  | 0%   | 0%   | 0%   | 0%   | A | A | A | A | U |
| b1498 | ydeN | 1578866 | 1580548 | - | 1682 | 67  | 0  | 0  | 0  | 0  | 0%   | 0%   | 0%   | 0%   | A | A | A | A | U |
| b1499 | ydeO | 1580950 | 1581711 | - | 761  | 30  | 0  | 0  | 0  | 0  | 0%   | 0%   | 0%   | 0%   | A | A | A | A | U |
| b1500 | yneN | 1581786 | 1581983 | - | 197  | 8   | 0  | 0  | 0  | 0  | 0%   | 0%   | 0%   | 0%   | A | A | A | A |   |
| b1501 | ydeP | 1582231 | 1584510 | - | 2279 | 91  | 0  | 54 | 54 | 54 | 0%   | 59%  | 59%  | 59%  | A | P | P | P | U |
| b1502 | ydeQ | 1584844 | 1585758 | - | 914  | 36  | 0  | 0  | 0  | 0  | 0%   | 0%   | 0%   | 0%   | A | A | A | A | U |
| b1503 | ydeR | 1585817 | 1586320 | - | 503  | 20  | 0  | 3  | 3  | 3  | 0%   | 15%  | 15%  | 15%  | A | P | P | P | U |
| b1504 | ydeS | 1586333 | 1586863 | - | 530  | 22  | 0  | 8  | 8  | 8  | 0%   | 36%  | 36%  | 36%  | A | P | P | P | U |
| b1505 | ydeT | 1586877 | 1588103 | - | 1226 | 49  | 0  | 10 | 10 | 11 | 0%   | 20%  | 20%  | 22%  | A | P | P | P | U |



|       |      |         |         |   |      |     |    |    |    |    |      |      |      |      |   |   |   |   |   |
|-------|------|---------|---------|---|------|-----|----|----|----|----|------|------|------|------|---|---|---|---|---|
| b1506 | yneL | 1588358 | 1588560 | - | 202  | 8   | 0  | 2  | 2  | 2  | 0%   | 25%  | 25%  | 25%  | A | P | P | P | U |
| b1507 | hipA | 1588878 | 1590200 | - | 1322 | 53  | 36 | 42 | 42 | 42 | 68%  | 79%  | 79%  | 79%  | P | P | P | P |   |
| b1508 | hipB | 1590200 | 1590466 | - | 266  | 11  | 11 | 11 | 11 | 11 | 100% | 100% | 100% | 100% | P | P | P | P |   |
| b1509 | ydeU | 1590689 | 1592089 | - | 1400 | 56  | 23 | 29 | 30 | 31 | 41%  | 52%  | 54%  | 55%  | P | P | P | P | U |
| b1510 | ydeK | 1592133 | 1596110 | - | 3977 | 159 | 41 | 69 | 74 | 75 | 26%  | 43%  | 47%  | 47%  | P | P | P | P | U |
| b1511 | lsrK | 1596641 | 1598233 | - | 1592 | 63  | 5  | 5  | 19 | 19 | 8%   | 8%   | 30%  | 30%  | P | P | P | P |   |
| b1512 | lsrR | 1598312 | 1599265 | - | 953  | 39  | 16 | 17 | 21 | 23 | 41%  | 44%  | 54%  | 59%  | P | P | P | P |   |
| b1520 | yneE | 1606132 | 1607046 | - | 914  | 37  | 26 | 26 | 26 | 26 | 70%  | 70%  | 70%  | 70%  | P | P | P | P | U |
| b1521 | uxaB | 1607253 | 1608704 | - | 1451 | 58  | 0  | 2  | 13 | 13 | 0%   | 3%   | 22%  | 22%  | A | P | P | P |   |
| b1522 | yneF | 1608931 | 1609878 | - | 947  | 38  | 5  | 9  | 10 | 10 | 13%  | 24%  | 26%  | 26%  | P | P | P | P | U |
| b1523 | yneG | 1609990 | 1610349 | - | 359  | 14  | 13 | 13 | 13 | 13 | 93%  | 93%  | 93%  | 93%  | P | P | P | P | U |
| b1524 | yneH | 1610349 | 1611275 | - | 926  | 37  | 37 | 37 | 37 | 37 | 100% | 100% | 100% | 100% | P | P | P | P | U |
| b1525 | sad  | 1611339 | 1612727 | - | 1388 | 55  | 49 | 49 | 49 | 50 | 89%  | 89%  | 89%  | 91%  | P | P | P | P | U |
| b1529 | marC | 1616267 | 1616932 | - | 665  | 26  | 20 | 21 | 21 | 22 | 77%  | 81%  | 81%  | 85%  | P | P | P | P | U |
| b1533 | eamA | 1618262 | 1619161 | - | 899  | 36  | 36 | 36 | 36 | 36 | 100% | 100% | 100% | 100% | P | P | P | P |   |
| b1535 | ydeH | 1620984 | 1621874 | - | 890  | 36  | 0  | 33 | 33 | 33 | 0%   | 92%  | 92%  | 92%  | A | P | P | P | U |
| b1536 | ydeI | 1622129 | 1622521 | - | 392  | 16  | 5  | 14 | 15 | 16 | 31%  | 88%  | 94%  | 100% | P | P | P | P | U |
| b1538 | dcp  | 1623359 | 1625404 | - | 2045 | 82  | 82 | 82 | 82 | 82 | 100% | 100% | 100% | 100% | P | P | P | P |   |
| b1542 | ydfI | 1627477 | 1628937 | - | 1460 | 59  | 0  | 2  | 3  | 3  | 0%   | 3%   | 5%   | 5%   | A | P | P | P | U |
| b4600 | ydfJ | 1629026 | 1630309 | - | 1283 | 51  | 0  | 0  | 3  | 3  | 0%   | 0%   | 6%   | 6%   | A | A | P | P | U |
| b1546 | tfaQ | 1632334 | 1632909 | - | 575  | 23  | 0  | 1  | 3  | 4  | 0%   | 4%   | 13%  | 17%  | A | P | P | P | U |
| b1547 | ydfN | 1632909 | 1633871 | - | 962  | 39  | 0  | 1  | 3  | 3  | 0%   | 3%   | 8%   | 8%   | A | P | P | P | U |
| b1548 | nohA | 1633864 | 1634391 | - | 527  | 21  | 0  | 0  | 2  | 2  | 0%   | 0%   | 10%  | 10%  | A | A | P | P | U |
| b1550 | gnsB | 1635633 | 1635806 | - | 173  | 6   | 5  | 5  | 5  | 5  | 83%  | 83%  | 83%  | 83%  | P | P | P | P | U |
| b1551 | ynfN | 1635978 | 1636133 | - | 155  | 6   | 0  | 0  | 0  | 0  | 0%   | 0%   | 0%   | 0%   | A | A | A | A | U |
| b1552 | cspI | 1636479 | 1636691 | - | 212  | 9   | 0  | 0  | 0  | 0  | 0%   | 0%   | 0%   | 0%   | A | A | A | A |   |
| b1553 | ydfP | 1637054 | 1637551 | - | 497  | 20  | 0  | 0  | 0  | 0  | 0%   | 0%   | 0%   | 0%   | A | A | A | A | U |
| b1554 | arrQ | 1637548 | 1638081 | - | 533  | 21  | 0  | 0  | 0  | 0  | 0%   | 0%   | 0%   | 0%   | A | A | A | A | U |
| b1555 | ydfR | 1638078 | 1638389 | - | 311  | 13  | 0  | 0  | 0  | 0  | 0%   | 0%   | 0%   | 0%   | A | A | A | A | U |
| b1556 | essQ | 1638394 | 1638609 | - | 215  | 8   | 0  | 0  | 0  | 0  | 0%   | 0%   | 0%   | 0%   | A | A | A | A | U |
| b1557 | cspB | 1639363 | 1639578 | - | 215  | 8   | 0  | 0  | 0  | 1  | 0%   | 0%   | 0%   | 13%  | A | A | A | P |   |
| b1559 | quuQ | 1640513 | 1641265 | - | 752  | 30  | 6  | 7  | 11 | 12 | 20%  | 23%  | 37%  | 40%  | P | P | P | P | U |
| b1560 | ydfU | 1641279 | 1642226 | - | 947  | 38  | 0  | 0  | 2  | 2  | 0%   | 0%   | 5%   | 5%   | A | A | P | P | U |
| b1561 | rem  | 1642675 | 1642926 | - | 251  | 10  | 1  | 2  | 7  | 7  | 10%  | 20%  | 70%  | 70%  | P | P | P | P | U |
| b1562 | hokD | 1643143 | 1643298 | - | 155  | 6   | 6  | 6  | 6  | 6  | 100% | 100% | 100% | 100% | P | P | P | P |   |
| b1563 | relE | 1643370 | 1643657 | - | 287  | 11  | 10 | 11 | 11 | 11 | 91%  | 100% | 100% | 100% | P | P | P | P |   |
| b1564 | relB | 1643657 | 1643896 | - | 239  | 10  | 9  | 10 | 10 | 10 | 90%  | 100% | 100% | 100% | P | P | P | P |   |
| b1567 | ydfW | 1645146 | 1645373 | - | 227  | 9   | 0  | 0  | 0  | 0  | 0%   | 0%   | 0%   | 0%   | A | A | A | A | U |
| b1568 | ydfX | 1645370 | 1645660 | - | 290  | 11  | 0  | 0  | 2  | 2  | 0%   | 0%   | 18%  | 18%  | A | A | P | P | U |
| b1569 | dicC | 1645644 | 1645874 | - | 230  | 9   | 0  | 0  | 0  | 0  | 0%   | 0%   | 0%   | 0%   | A | A | A | A |   |
| b4600 | ydfJ | 1650779 | 1650862 | - | 83   | 3   | 0  | 0  | 0  | 0  | 0%   | 0%   | 0%   | 0%   | A | A | A | A | U |
| b1580 | rspB | 1650920 | 1651939 | - | 1019 | 40  | 0  | 0  | 0  | 0  | 0%   | 0%   | 0%   | 0%   | A | A | A | A | U |
| b1581 | rspA | 1651951 | 1653165 | - | 1214 | 48  | 0  | 0  | 4  | 4  | 0%   | 0%   | 8%   | 8%   | A | A | P | P | U |
| b1582 | ynfA | 1653371 | 1653697 | - | 326  | 13  | 8  | 8  | 8  | 9  | 62%  | 62%  | 62%  | 69%  | P | P | P | P | U |
| b1585 | ynfC | 1654771 | 1655481 | - | 710  | 28  | 20 | 20 | 20 | 22 | 71%  | 71%  | 71%  | 79%  | P | P | P | P | U |
| b1593 | ynfK | 1664548 | 1665243 | - | 695  | 27  | 22 | 27 | 27 | 27 | 81%  | 100% | 100% | 100% | P | P | P | P | U |

|       |      |         |         |   |      |    |    |    |    |    |      |      |      |      |   |   |   |   |   |
|-------|------|---------|---------|---|------|----|----|----|----|----|------|------|------|------|---|---|---|---|---|
| b1594 | dgsA | 1665368 | 1666588 | - | 1220 | 49 | 43 | 44 | 44 | 44 | 88%  | 90%  | 90%  | 90%  | P | P | P | P |   |
| b1595 | ynfL | 1666723 | 1667616 | - | 893  | 35 | 4  | 4  | 8  | 8  | 11%  | 11%  | 23%  | 23%  | P | P | P | P | U |
| b1599 | mdtI | 1670844 | 1671173 | - | 329  | 14 | 1  | 1  | 1  | 1  | 7%   | 7%   | 7%   | 7%   | P | P | P | P |   |
| b1600 | mdtJ | 1671160 | 1671525 | - | 365  | 15 | 4  | 4  | 4  | 4  | 27%  | 27%  | 27%  | 27%  | P | P | P | P |   |
| b1602 | pntB | 1672996 | 1674384 | - | 1388 | 55 | 55 | 55 | 55 | 55 | 100% | 100% | 100% | 100% | P | P | P | P |   |
| b1603 | pntA | 1674395 | 1675927 | - | 1532 | 62 | 62 | 62 | 62 | 62 | 100% | 100% | 100% | 100% | P | P | P | P |   |
| b1607 | ydgC | 1679719 | 1680054 | - | 335  | 14 | 13 | 13 | 13 | 13 | 93%  | 93%  | 93%  | 93%  | P | P | P | P | U |
| b1611 | fumC | 1683209 | 1684612 | - | 1403 | 56 | 51 | 51 | 51 | 51 | 91%  | 91%  | 91%  | 91%  | P | P | P | P |   |
| b1612 | fumA | 1684755 | 1686401 | - | 1646 | 66 | 66 | 66 | 66 | 66 | 100% | 100% | 100% | 100% | P | P | P | P |   |
| b1615 | uidC | 1689610 | 1690875 | - | 1265 | 51 | 0  | 1  | 5  | 5  | 0%   | 2%   | 10%  | 10%  | A | P | P | P | U |
| b1616 | uidB | 1690914 | 1692287 | - | 1373 | 55 | 0  | 0  | 3  | 3  | 0%   | 0%   | 5%   | 5%   | A | A | P | P | U |
| b1617 | uidA | 1692284 | 1694095 | - | 1811 | 73 | 0  | 0  | 8  | 8  | 0%   | 0%   | 11%  | 11%  | A | A | P | P |   |
| b1618 | uidR | 1694486 | 1695076 | - | 590  | 24 | 16 | 16 | 17 | 17 | 67%  | 67%  | 71%  | 71%  | P | P | P | P |   |
| b1619 | hdhA | 1695297 | 1696064 | - | 767  | 30 | 30 | 30 | 30 | 30 | 100% | 100% | 100% | 100% | P | P | P | P |   |
| b1620 | malI | 1696176 | 1697204 | - | 1028 | 41 | 4  | 29 | 29 | 29 | 10%  | 71%  | 71%  | 71%  | P | P | P | P |   |
| b1624 | ydgJ | 1701292 | 1702332 | - | 1040 | 42 | 42 | 42 | 42 | 42 | 100% | 100% | 100% | 100% | P | P | P | P | U |
| b1636 | pdxY | 1713050 | 1713913 | - | 863  | 34 | 31 | 31 | 31 | 31 | 91%  | 91%  | 91%  | 91%  | P | P | P | P |   |
| b1637 | tyrS | 1713972 | 1715246 | - | 1274 | 51 | 50 | 50 | 50 | 50 | 98%  | 98%  | 98%  | 98%  | P | P | P | P |   |
| b1638 | pdxH | 1715375 | 1716031 | - | 656  | 26 | 26 | 26 | 26 | 26 | 100% | 100% | 100% | 100% | P | P | P | P |   |
| b1639 | ydhA | 1716090 | 1716419 | - | 329  | 13 | 8  | 9  | 9  | 10 | 62%  | 69%  | 69%  | 77%  | P | P | P | P | U |
| b1640 | anmK | 1716517 | 1717626 | - | 1109 | 45 | 33 | 33 | 33 | 33 | 73%  | 73%  | 73%  | 73%  | P | P | P | P | U |
| b1642 | slyA | 1718414 | 1718848 | - | 434  | 18 | 18 | 18 | 18 | 18 | 100% | 100% | 100% | 100% | P | P | P | P |   |
| b1646 | sodC | 1722158 | 1722679 | - | 521  | 21 | 20 | 20 | 20 | 20 | 95%  | 95%  | 95%  | 95%  | P | P | P | P |   |
| b1647 | ydhF | 1722760 | 1723656 | - | 896  | 36 | 36 | 36 | 36 | 36 | 100% | 100% | 100% | 100% | P | P | P | P | U |
| b1648 | ydhL | 1723705 | 1723944 | - | 239  | 9  | 6  | 6  | 7  | 7  | 67%  | 67%  | 78%  | 78%  | P | P | P | P | U |
| b1654 | grxD | 1731778 | 1732125 | - | 347  | 14 | 14 | 14 | 14 | 14 | 100% | 100% | 100% | 100% | P | P | P | P | U |
| b1657 | ydhP | 1734145 | 1735314 | - | 1169 | 46 | 21 | 21 | 22 | 22 | 46%  | 46%  | 48%  | 48%  | P | P | P | P | U |
| b4602 | ynhF | 1735480 | 1735569 | - | 89   | 4  | 4  | 4  | 4  | 4  | 100% | 100% | 100% | 100% | P | P | P | P | U |
| b1659 | ydhB | 1736890 | 1737822 | - | 932  | 38 | 18 | 21 | 21 | 21 | 47%  | 55%  | 55%  | 55%  | P | P | P | P | U |
| b1662 | ribC | 1740625 | 1741266 | - | 641  | 26 | 26 | 26 | 26 | 26 | 100% | 100% | 100% | 100% | P | P | P | P |   |
| b1664 | ydhQ | 1742895 | 1744151 | - | 1256 | 50 | 49 | 50 | 50 | 50 | 98%  | 100% | 100% | 100% | P | P | P | P | U |
| b1669 | ydhT | 1746771 | 1747583 | - | 812  | 32 | 0  | 1  | 1  | 1  | 0%   | 3%   | 3%   | 3%   | A | P | P | P | U |
| b1670 | ydhU | 1747587 | 1748372 | - | 785  | 32 | 0  | 4  | 9  | 10 | 0%   | 13%  | 28%  | 31%  | A | P | P | P | U |
| b1671 | ydhX | 1748369 | 1749088 | - | 719  | 28 | 0  | 2  | 2  | 3  | 0%   | 7%   | 7%   | 11%  | A | P | P | P | U |
| b1672 | ydhW | 1749101 | 1749748 | - | 647  | 26 | 0  | 4  | 5  | 5  | 0%   | 15%  | 19%  | 19%  | A | P | P | P | U |
| b1673 | ydhV | 1749752 | 1751854 | - | 2102 | 84 | 0  | 12 | 13 | 13 | 0%   | 14%  | 15%  | 15%  | A | P | P | P | U |
| b1674 | ydhY | 1751875 | 1752501 | - | 626  | 25 | 0  | 5  | 5  | 5  | 0%   | 20%  | 20%  | 20%  | A | P | P | P | U |
| b1675 | ydhZ | 1752956 | 1753165 | - | 209  | 9  | 7  | 7  | 7  | 7  | 78%  | 78%  | 78%  | 78%  | P | P | P | P | U |
| b1678 | ynhG | 1755745 | 1756749 | - | 1004 | 40 | 38 | 38 | 40 | 40 | 95%  | 95%  | 100% | 100% | P | P | P | P | U |
| b1679 | sufE | 1756898 | 1757314 | - | 416  | 16 | 12 | 12 | 13 | 13 | 75%  | 75%  | 81%  | 81%  | P | P | P | P |   |
| b1680 | sufS | 1757327 | 1758547 | - | 1220 | 49 | 47 | 47 | 49 | 49 | 96%  | 96%  | 100% | 100% | P | P | P | P |   |
| b1681 | sufD | 1758544 | 1759815 | - | 1271 | 51 | 51 | 51 | 51 | 51 | 100% | 100% | 100% | 100% | P | P | P | P |   |
| b1682 | sufC | 1759790 | 1760536 | - | 746  | 30 | 28 | 28 | 30 | 30 | 93%  | 93%  | 100% | 100% | P | P | P | P |   |
| b1683 | sufB | 1760546 | 1762033 | - | 1487 | 59 | 57 | 57 | 59 | 59 | 97%  | 97%  | 100% | 100% | P | P | P | P |   |
| b1684 | sufA | 1762042 | 1762410 | - | 368  | 15 | 15 | 15 | 15 | 15 | 100% | 100% | 100% | 100% | P | P | P | P |   |
| b4430 | rydB | 1762737 | 1762804 | - | 67   | 3  | 3  | 3  | 3  | 3  | 100% | 100% | 100% | 100% | P | P | P | P | U |

|       |      |         |         |   |      |     |     |     |     |     |      |      |      |      |   |   |   |   |   |
|-------|------|---------|---------|---|------|-----|-----|-----|-----|-----|------|------|------|------|---|---|---|---|---|
| b1685 | ydiH | 1762958 | 1763227 | - | 269  | 11  | 9   | 9   | 9   | 9   | 82%  | 82%  | 82%  | 82%  | P | P | P | P | U |
| b1686 | ydiI | 1763246 | 1763656 | - | 410  | 16  | 16  | 16  | 16  | 16  | 100% | 100% | 100% | 100% | P | P | P | P | U |
| b1687 | ydiJ | 1763653 | 1766709 | - | 3056 | 122 | 122 | 122 | 122 | 122 | 100% | 100% | 100% | 100% | P | P | P | P | U |
| b1696 | ydiP | 1776414 | 1777325 | - | 911  | 37  | 0   | 2   | 2   | 9   | 0%   | 5%   | 5%   | 24%  | A | P | P | P | U |
| b1702 | pps  | 1782758 | 1785136 | - | 2378 | 95  | 95  | 95  | 95  | 95  | 100% | 100% | 100% | 100% | P | P | P | P |   |
| b1706 | ydiU | 1787832 | 1789268 | - | 1436 | 57  | 54  | 54  | 54  | 54  | 95%  | 95%  | 95%  | 95%  | P | P | P | P | U |
| b1707 | ydiV | 1789331 | 1790044 | - | 713  | 28  | 16  | 16  | 17  | 18  | 57%  | 57%  | 61%  | 64%  | P | P | P | P | U |
| b1708 | nlpC | 1790291 | 1790755 | - | 464  | 19  | 19  | 19  | 19  | 19  | 100% | 100% | 100% | 100% | P | P | P | P | U |
| b1709 | btuD | 1790833 | 1791582 | - | 749  | 30  | 30  | 30  | 30  | 30  | 100% | 100% | 100% | 100% | P | P | P | P |   |
| b1710 | btuE | 1791582 | 1792133 | - | 551  | 22  | 22  | 22  | 22  | 22  | 100% | 100% | 100% | 100% | P | P | P | P | U |
| b1711 | btuC | 1792196 | 1793176 | - | 980  | 40  | 34  | 34  | 35  | 35  | 85%  | 85%  | 88%  | 88%  | P | P | P | P |   |
| b1712 | ihfA | 1793277 | 1793576 | - | 299  | 12  | 12  | 12  | 12  | 12  | 100% | 100% | 100% | 100% | P | P | P | P |   |
| b1713 | pheT | 1793581 | 1795968 | - | 2387 | 95  | 94  | 94  | 94  | 94  | 99%  | 99%  | 99%  | 99%  | P | P | P | P |   |
| b1714 | pheS | 1795983 | 1796966 | - | 983  | 39  | 39  | 39  | 39  | 39  | 100% | 100% | 100% | 100% | P | P | P | P |   |
| b1715 | pheM | 1797250 | 1797294 | - | 44   | 1   | 1   | 1   | 1   | 1   | 100% | 100% | 100% | 100% | P | P | P | P |   |
| b1716 | rplT | 1797417 | 1797773 | - | 356  | 15  | 15  | 15  | 15  | 15  | 100% | 100% | 100% | 100% | P | P | P | P |   |
| b1717 | rpmI | 1797826 | 1798023 | - | 197  | 8   | 8   | 8   | 8   | 8   | 100% | 100% | 100% | 100% | P | P | P | P |   |
| b1718 | infC | 1798120 | 1798662 | - | 542  | 22  | 22  | 22  | 22  | 22  | 100% | 100% | 100% | 100% | P | P | P | P |   |
| b1719 | thrS | 1798666 | 1800594 | - | 1928 | 77  | 77  | 77  | 77  | 77  | 100% | 100% | 100% | 100% | P | P | P | P |   |
| b1722 | ydiY | 1803349 | 1804107 | - | 758  | 30  | 28  | 28  | 28  | 28  | 93%  | 93%  | 93%  | 93%  | P | P | P | P | U |
| b1726 | yniB | 1806721 | 1807257 | - | 536  | 22  | 21  | 21  | 21  | 22  | 95%  | 95%  | 95%  | 100% | P | P | P | P | U |
| b1730 | ydjO | 1810353 | 1811168 | - | 815  | 32  | 0   | 0   | 0   | 0   | 0%   | 0%   | 0%   | 0%   | A | A | A | A | U |
| b1731 | cedA | 1811445 | 1811687 | - | 242  | 10  | 6   | 6   | 6   | 6   | 60%  | 60%  | 60%  | 60%  | P | P | P | P |   |
| b1733 | chbG | 1814410 | 1815159 | - | 749  | 30  | 11  | 11  | 11  | 12  | 37%  | 37%  | 37%  | 40%  | P | P | P | P | U |
| b1734 | chbF | 1815172 | 1816524 | - | 1352 | 54  | 9   | 10  | 12  | 14  | 17%  | 19%  | 22%  | 26%  | P | P | P | P |   |
| b1735 | chbR | 1816629 | 1817471 | - | 842  | 34  | 5   | 5   | 7   | 11  | 15%  | 15%  | 21%  | 32%  | P | P | P | P |   |
| b1736 | chbA | 1817479 | 1817829 | - | 350  | 14  | 6   | 7   | 7   | 8   | 43%  | 50%  | 50%  | 57%  | P | P | P | P |   |
| b1737 | chbC | 1817880 | 1819238 | - | 1358 | 55  | 3   | 4   | 5   | 5   | 5%   | 7%   | 9%   | 9%   | P | P | P | P |   |
| b1738 | chbB | 1819323 | 1819643 | - | 320  | 13  | 10  | 12  | 12  | 12  | 77%  | 92%  | 92%  | 92%  | P | P | P | P |   |
| b1739 | osmE | 1819942 | 1820280 | - | 338  | 13  | 13  | 13  | 13  | 13  | 100% | 100% | 100% | 100% | P | P | P | P |   |
| b1742 | ves  | 1822386 | 1822961 | - | 575  | 23  | 0   | 4   | 4   | 5   | 0%   | 17%  | 17%  | 22%  | A | P | P | P | U |
| b1743 | spy  | 1823164 | 1823649 | - | 485  | 19  | 12  | 18  | 19  | 19  | 63%  | 95%  | 100% | 100% | P | P | P | P |   |
| b1744 | astE | 1823979 | 1824947 | - | 968  | 39  | 1   | 1   | 32  | 32  | 3%   | 3%   | 82%  | 82%  | P | P | P | P |   |
| b1745 | astB | 1824940 | 1826283 | - | 1343 | 53  | 1   | 1   | 51  | 52  | 2%   | 2%   | 96%  | 98%  | P | P | P | P |   |
| b1746 | astD | 1826280 | 1827758 | - | 1478 | 59  | 2   | 2   | 57  | 58  | 3%   | 3%   | 97%  | 98%  | P | P | P | P |   |
| b1747 | astA | 1827755 | 1828789 | - | 1034 | 42  | 7   | 7   | 42  | 42  | 17%  | 17%  | 100% | 100% | P | P | P | P |   |
| b1748 | astC | 1828786 | 1830006 | - | 1220 | 48  | 16  | 16  | 48  | 48  | 33%  | 33%  | 100% | 100% | P | P | P | P |   |
| b1758 | ynjF | 1838807 | 1839427 | - | 620  | 25  | 13  | 13  | 13  | 14  | 52%  | 52%  | 52%  | 56%  | P | P | P | P | U |
| b1760 | ynjH | 1839887 | 1840159 | - | 272  | 10  | 0   | 1   | 3   | 3   | 0%   | 10%  | 30%  | 30%  | A | P | P | P | U |
| b1762 | ynjI | 1841855 | 1842895 | - | 1040 | 42  | 0   | 3   | 3   | 3   | 0%   | 7%   | 7%   | 7%   | A | P | P | P | U |
| b1763 | topB | 1843023 | 1844984 | - | 1961 | 78  | 77  | 77  | 77  | 77  | 99%  | 99%  | 99%  | 99%  | P | P | P | P |   |
| b1764 | selD | 1844989 | 1846032 | - | 1043 | 41  | 41  | 41  | 41  | 41  | 100% | 100% | 100% | 100% | P | P | P | P |   |
| b1765 | ydjA | 1846149 | 1846700 | - | 551  | 22  | 22  | 22  | 22  | 22  | 100% | 100% | 100% | 100% | P | P | P | P | U |
| b1769 | ydjE | 1850645 | 1852003 | - | 1358 | 54  | 0   | 0   | 0   | 0   | 0%   | 0%   | 0%   | 0%   | A | A | A | A | U |
| b1770 | ydjF | 1852120 | 1852878 | - | 758  | 30  | 15  | 15  | 15  | 15  | 50%  | 50%  | 50%  | 50%  | P | P | P | P | U |
| b1771 | ydjG | 1853015 | 1853995 | - | 980  | 39  | 0   | 1   | 1   | 1   | 0%   | 3%   | 3%   | 3%   | A | P | P | P | U |

|         |      |         |         |   |      |    |    |    |    |    |      |      |      |      |   |   |   |   |   |
|---------|------|---------|---------|---|------|----|----|----|----|----|------|------|------|------|---|---|---|---|---|
| b1772   | ydjH | 1854005 | 1854952 | - | 947  | 38 | 0  | 0  | 0  | 0  | 0%   | 0%   | 0%   | 0%   | A | A | A | A | U |
| b1773   | ydjI | 1854957 | 1855793 | - | 836  | 34 | 0  | 0  | 0  | 0  | 0%   | 0%   | 0%   | 0%   | A | A | A | A | U |
| b1774   | ydjJ | 1855814 | 1856857 | - | 1043 | 41 | 0  | 0  | 0  | 0  | 0%   | 0%   | 0%   | 0%   | A | A | A | A | U |
| b1775   | ydjK | 1856874 | 1858253 | - | 1379 | 55 | 0  | 0  | 0  | 0  | 0%   | 0%   | 0%   | 0%   | A | A | A | A | U |
| b1776   | ydjL | 1858280 | 1859356 | - | 1076 | 43 | 0  | 0  | 0  | 0  | 0%   | 0%   | 0%   | 0%   | A | A | A | A | U |
| b1777   | yeaC | 1859726 | 1859998 | - | 272  | 11 | 11 | 11 | 11 | 11 | 100% | 100% | 100% | 100% | P | P | P | P | U |
| b1778   | msrB | 1860040 | 1860453 | - | 413  | 16 | 16 | 16 | 16 | 16 | 100% | 100% | 100% | 100% | P | P | P | P |   |
| b1781   | yeaE | 1862806 | 1863660 | - | 854  | 35 | 18 | 18 | 19 | 19 | 51%  | 51%  | 54%  | 54%  | P | P | P | P | U |
| b1782   | mipA | 1863750 | 1864496 | - | 746  | 30 | 30 | 30 | 30 | 30 | 100% | 100% | 100% | 100% | P | P | P | P |   |
| b1788   | yoaI | 1872102 | 1872206 | - | 104  | 4  | 0  | 0  | 0  | 0  | 0%   | 0%   | 0%   | 0%   | A | A | A | A | U |
| b1790   | yeaM | 1872779 | 1873600 | - | 821  | 33 | 23 | 23 | 23 | 23 | 70%  | 70%  | 70%  | 70%  | P | P | P | P | U |
| b1793   | yoaF | 1875302 | 1875556 | - | 254  | 10 | 10 | 10 | 10 | 10 | 100% | 100% | 100% | 100% | P | P | P | P | U |
| b1795   | yeaQ | 1877031 | 1877279 | - | 248  | 10 | 10 | 10 | 10 | 10 | 100% | 100% | 100% | 100% | P | P | P | P | U |
| b1796   | yoaG | 1877427 | 1877609 | - | 182  | 7  | 0  | 4  | 4  | 4  | 0%   | 57%  | 57%  | 57%  | A | P | P | P | U |
| b1797   | yeaR | 1877613 | 1877972 | - | 359  | 15 | 0  | 2  | 2  | 2  | 0%   | 13%  | 13%  | 13%  | A | P | P | P | U |
| b1798   | leuE | 1878145 | 1878783 | - | 638  | 25 | 1  | 8  | 8  | 8  | 4%   | 32%  | 32%  | 32%  | P | P | P | P |   |
| b1799   | yeaT | 1878910 | 1879833 | - | 923  | 37 | 28 | 28 | 28 | 32 | 76%  | 76%  | 76%  | 86%  | P | P | P | P | U |
| b1804   | rnd  | 1884888 | 1886015 | - | 1127 | 45 | 35 | 35 | 35 | 35 | 78%  | 78%  | 78%  | 78%  | P | P | P | P |   |
| G0-9384 | sroD | 1886041 | 1886126 | - | 85   | 4  | 2  | 2  | 3  | 3  | 50%  | 50%  | 75%  | 75%  | P | P | P | P |   |
| b1805   | fadD | 1886085 | 1887770 | - | 1685 | 68 | 51 | 51 | 68 | 68 | 75%  | 75%  | 100% | 100% | P | P | P | P |   |
| b1806   | yeaY | 1887975 | 1888556 | - | 581  | 23 | 20 | 20 | 20 | 20 | 87%  | 87%  | 87%  | 87%  | P | P | P | P | U |
| b1807   | yeaZ | 1888596 | 1889291 | - | 695  | 27 | 26 | 26 | 26 | 26 | 96%  | 96%  | 96%  | 96%  | P | P | P | P | U |
| b1808   | yoaA | 1889349 | 1891259 | - | 1910 | 76 | 60 | 60 | 60 | 60 | 79%  | 79%  | 79%  | 79%  | P | P | P | P | U |
| b1811   | yoaH | 1892576 | 1892755 | - | 179  | 7  | 7  | 7  | 7  | 7  | 100% | 100% | 100% | 100% | P | P | P | P | U |
| b1816   | yoaE | 1898053 | 1899609 | - | 1556 | 62 | 58 | 58 | 58 | 58 | 94%  | 94%  | 94%  | 94%  | P | P | P | P | U |
| b1822   | rrmA | 1904275 | 1905084 | - | 809  | 32 | 29 | 29 | 29 | 29 | 91%  | 91%  | 91%  | 91%  | P | P | P | P |   |
| b1823   | cspC | 1905250 | 1905459 | - | 209  | 8  | 8  | 8  | 8  | 8  | 100% | 100% | 100% | 100% | P | P | P | P |   |
| b1824   | yobF | 1905472 | 1905615 | - | 143  | 5  | 5  | 5  | 5  | 5  | 100% | 100% | 100% | 100% | P | P | P | P | U |
| b1825   | yebO | 1906285 | 1906572 | - | 287  | 12 | 9  | 10 | 10 | 10 | 75%  | 83%  | 83%  | 83%  | P | P | P | P | U |
| b1826   | mgrB | 1906647 | 1906790 | - | 143  | 5  | 5  | 5  | 5  | 5  | 100% | 100% | 100% | 100% | P | P | P | P | U |
| b1827   | kdgR | 1907332 | 1908123 | - | 791  | 32 | 32 | 32 | 32 | 32 | 100% | 100% | 100% | 100% | P | P | P | P | U |
| b1829   | htpX | 1909719 | 1910600 | - | 881  | 36 | 35 | 36 | 36 | 36 | 97%  | 100% | 100% | 100% | P | P | P | P | U |
| b1830   | prc  | 1910792 | 1912840 | - | 2048 | 82 | 82 | 82 | 82 | 82 | 100% | 100% | 100% | 100% | P | P | P | P |   |
| b1831   | proQ | 1912860 | 1913558 | - | 698  | 28 | 28 | 28 | 28 | 28 | 100% | 100% | 100% | 100% | P | P | P | P | U |
| b1832   | yebR | 1913655 | 1914152 | - | 497  | 20 | 20 | 20 | 20 | 20 | 100% | 100% | 100% | 100% | P | P | P | P |   |
| b1838   | pphA | 1920337 | 1920993 | - | 656  | 26 | 0  | 15 | 15 | 15 | 0%   | 58%  | 58%  | 58%  | A | P | P | P |   |
| b4433   | ryeB | 1921188 | 1921308 | - | 120  | 5  | 2  | 2  | 3  | 3  | 40%  | 40%  | 60%  | 60%  | P | P | P | P | U |
| b1839   | yebY | 1921389 | 1921730 | - | 341  | 14 | 13 | 13 | 13 | 13 | 93%  | 93%  | 93%  | 93%  | P | P | P | P | U |
| b1840   | yebZ | 1921743 | 1922615 | - | 872  | 35 | 35 | 35 | 35 | 35 | 100% | 100% | 100% | 100% | P | P | P | P | U |
| b1841   | yobA | 1922619 | 1922993 | - | 374  | 15 | 15 | 15 | 15 | 15 | 100% | 100% | 100% | 100% | P | P | P | P | U |
| b1845   | ptrB | 1924803 | 1926863 | - | 2060 | 82 | 52 | 52 | 52 | 59 | 63%  | 63%  | 63%  | 72%  | P | P | P | P |   |
| b1846   | yebE | 1927072 | 1927731 | - | 659  | 26 | 22 | 26 | 26 | 26 | 85%  | 100% | 100% | 100% | P | P | P | P | U |
| b1847   | yebF | 1928058 | 1928414 | - | 356  | 14 | 14 | 14 | 14 | 14 | 100% | 100% | 100% | 100% | P | P | P | P | U |
| b1848   | yebG | 1928481 | 1928771 | - | 290  | 12 | 12 | 12 | 12 | 12 | 100% | 100% | 100% | 100% | P | P | P | P | U |
| b1850   | eda  | 1930139 | 1930780 | - | 641  | 26 | 26 | 26 | 26 | 26 | 100% | 100% | 100% | 100% | P | P | P | P |   |
| b1851   | edd  | 1930817 | 1932628 | - | 1811 | 73 | 72 | 72 | 72 | 72 | 99%  | 99%  | 99%  | 99%  | P | P | P | P |   |

|       |      |         |         |   |      |    |    |    |    |    |      |      |      |      |   |   |   |   |   |
|-------|------|---------|---------|---|------|----|----|----|----|----|------|------|------|------|---|---|---|---|---|
| b1852 | zwf  | 1932863 | 1934338 | - | 1475 | 59 | 58 | 58 | 58 | 58 | 98%  | 98%  | 98%  | 98%  | P | P | P | P |   |
| b1855 | lpxM | 1937246 | 1938217 | - | 971  | 39 | 38 | 38 | 38 | 38 | 97%  | 97%  | 97%  | 97%  | P | P | P | P |   |
| b1856 | yebA | 1938337 | 1939659 | - | 1322 | 53 | 53 | 53 | 53 | 53 | 100% | 100% | 100% | 100% | P | P | P | P | U |
| b1857 | znuA | 1939675 | 1940607 | - | 932  | 37 | 37 | 37 | 37 | 37 | 100% | 100% | 100% | 100% | P | P | P | P |   |
| b1860 | ruvB | 1942370 | 1943380 | - | 1010 | 41 | 41 | 41 | 41 | 41 | 100% | 100% | 100% | 100% | P | P | P | P |   |
| b1861 | ruvA | 1943389 | 1944000 | - | 611  | 25 | 25 | 25 | 25 | 25 | 100% | 100% | 100% | 100% | P | P | P | P |   |
| b1863 | ruvC | 1944879 | 1945400 | - | 521  | 21 | 20 | 20 | 20 | 20 | 95%  | 95%  | 95%  | 95%  | P | P | P | P |   |
| b1864 | yebC | 1945435 | 1946175 | - | 740  | 30 | 30 | 30 | 30 | 30 | 100% | 100% | 100% | 100% | P | P | P | P | U |
| b1865 | nudB | 1946204 | 1946656 | - | 452  | 18 | 18 | 18 | 18 | 18 | 100% | 100% | 100% | 100% | P | P | P | P |   |
| b1866 | aspS | 1946774 | 1948546 | - | 1772 | 71 | 71 | 71 | 71 | 71 | 100% | 100% | 100% | 100% | P | P | P | P |   |
| b1872 | torZ | 1952602 | 1955031 | - | 2429 | 97 | 4  | 13 | 18 | 18 | 4%   | 13%  | 19%  | 19%  | P | P | P | P |   |
| b1873 | torY | 1955056 | 1956156 | - | 1100 | 44 | 0  | 1  | 1  | 2  | 0%   | 2%   | 2%   | 5%   | A | P | P | P |   |
| b1874 | cutC | 1956544 | 1957290 | - | 746  | 30 | 30 | 30 | 30 | 30 | 100% | 100% | 100% | 100% | P | P | P | P |   |
| b1875 | yecM | 1957304 | 1957870 | - | 566  | 22 | 22 | 22 | 22 | 22 | 100% | 100% | 100% | 100% | P | P | P | P | U |
| b1878 | flhE | 1960604 | 1960996 | - | 392  | 15 | 0  | 0  | 0  | 0  | 0%   | 0%   | 0%   | 0%   | A | A | A | A | U |
| b1879 | flhA | 1960996 | 1963074 | - | 2078 | 84 | 8  | 9  | 10 | 10 | 10%  | 11%  | 12%  | 12%  | P | P | P | P | U |
| b1880 | flhB | 1963067 | 1964215 | - | 1148 | 46 | 0  | 0  | 2  | 2  | 0%   | 0%   | 4%   | 4%   | A | A | P | P | U |
| b1881 | cheZ | 1964417 | 1965061 | - | 644  | 26 | 4  | 7  | 7  | 7  | 15%  | 27%  | 27%  | 27%  | P | P | P | P |   |
| b1882 | cheY | 1965072 | 1965461 | - | 389  | 16 | 3  | 7  | 7  | 7  | 19%  | 44%  | 44%  | 44%  | P | P | P | P |   |
| b1883 | cheB | 1965476 | 1966525 | - | 1049 | 42 | 2  | 4  | 5  | 6  | 5%   | 10%  | 12%  | 14%  | P | P | P | P |   |
| b1884 | cheR | 1966528 | 1967388 | - | 860  | 34 | 0  | 0  | 0  | 0  | 0%   | 0%   | 0%   | 0%   | A | A | A | A |   |
| b1885 | tap  | 1967407 | 1969008 | - | 1601 | 64 | 0  | 1  | 1  | 1  | 0%   | 2%   | 2%   | 2%   | A | P | P | P |   |
| b1886 | tar  | 1969054 | 1970715 | - | 1661 | 66 | 0  | 10 | 10 | 10 | 0%   | 15%  | 15%  | 15%  | A | P | P | P |   |
| b1887 | cheW | 1970860 | 1971363 | - | 503  | 20 | 0  | 0  | 0  | 0  | 0%   | 0%   | 0%   | 0%   | A | A | A | A |   |
| b1888 | cheA | 1971384 | 1973348 | - | 1964 | 78 | 0  | 10 | 10 | 10 | 0%   | 13%  | 13%  | 13%  | A | P | P | P |   |
| b1889 | motB | 1973353 | 1974279 | - | 926  | 37 | 0  | 5  | 5  | 6  | 0%   | 14%  | 14%  | 16%  | A | P | P | P |   |
| b1890 | motA | 1974276 | 1975163 | - | 887  | 35 | 0  | 14 | 14 | 14 | 0%   | 40%  | 40%  | 40%  | A | P | P | P |   |
| b1891 | flhC | 1975290 | 1975868 | - | 578  | 23 | 21 | 22 | 22 | 22 | 91%  | 96%  | 96%  | 96%  | P | P | P | P |   |
| b1892 | flhD | 1975871 | 1976221 | - | 350  | 14 | 13 | 13 | 13 | 13 | 93%  | 93%  | 93%  | 93%  | P | P | P | P |   |
| b1893 | insB | 1976542 | 1977045 | - | 503  | 20 | 10 | 14 | 15 | 15 | 50%  | 70%  | 75%  | 75%  | P | P | P | P |   |
| b1894 | insA | 1976964 | 1977239 | - | 275  | 11 | 10 | 10 | 10 | 10 | 91%  | 91%  | 91%  | 91%  | P | P | P | P |   |
| b1896 | otsA | 1978212 | 1979636 | - | 1424 | 57 | 56 | 56 | 57 | 57 | 98%  | 98%  | 100% | 100% | P | P | P | P |   |
| b1897 | otsB | 1979611 | 1980411 | - | 800  | 32 | 32 | 32 | 32 | 32 | 100% | 100% | 100% | 100% | P | P | P | P |   |
| b4460 | araH | 1980578 | 1981564 | - | 986  | 39 | 0  | 9  | 36 | 36 | 0%   | 23%  | 92%  | 92%  | A | P | P | P |   |
| b1900 | araG | 1981579 | 1983093 | - | 1514 | 60 | 0  | 9  | 56 | 56 | 0%   | 15%  | 93%  | 93%  | A | P | P | P |   |
| b1901 | araF | 1983163 | 1984152 | - | 989  | 40 | 0  | 8  | 39 | 39 | 0%   | 20%  | 98%  | 98%  | A | P | P | P |   |
| b4537 | yecJ | 1985531 | 1985782 | - | 251  | 10 | 10 | 10 | 10 | 10 | 100% | 100% | 100% | 100% | P | P | P | P | U |
| b4434 | isrB | 1985863 | 1986022 | - | 159  | 6  | 5  | 5  | 5  | 5  | 83%  | 83%  | 83%  | 83%  | P | P | P | P | U |
| b1906 | yecH | 1987275 | 1987514 | - | 239  | 10 | 0  | 7  | 10 | 10 | 0%   | 70%  | 100% | 100% | A | P | P | P | U |
| b1908 | yecA | 1988978 | 1989643 | - | 665  | 26 | 26 | 26 | 26 | 26 | 100% | 100% | 100% | 100% | P | P | P | P | U |
| b1909 | leuZ | 1989839 | 1989925 | - | 86   | 3  | 3  | 3  | 3  | 3  | 100% | 100% | 100% | 100% | P | P | P | P |   |
| b1910 | cysT | 1989938 | 1990011 | - | 73   | 3  | 3  | 3  | 3  | 3  | 100% | 100% | 100% | 100% | P | P | P | P |   |
| b1911 | glyW | 1990066 | 1990141 | - | 75   | 3  | 3  | 3  | 3  | 3  | 100% | 100% | 100% | 100% | P | P | P | P |   |
| b1912 | pgsA | 1990293 | 1990841 | - | 548  | 22 | 22 | 22 | 22 | 22 | 100% | 100% | 100% | 100% | P | P | P | P |   |
| b1913 | uvrC | 1990898 | 1992730 | - | 1832 | 74 | 70 | 70 | 70 | 71 | 95%  | 95%  | 95%  | 96%  | P | P | P | P |   |
| b1914 | uvrY | 1992727 | 1993383 | - | 656  | 27 | 27 | 27 | 27 | 27 | 100% | 100% | 100% | 100% | P | P | P | P |   |

|       |      |         |         |   |      |    |    |    |    |    |      |      |      |      |   |   |   |   |   |
|-------|------|---------|---------|---|------|----|----|----|----|----|------|------|------|------|---|---|---|---|---|
| b1916 | sdiA | 1994134 | 1994856 | - | 722  | 29 | 14 | 17 | 22 | 22 | 48%  | 59%  | 76%  | 76%  | P | P | P | P |   |
| b1917 | yecC | 1995086 | 1995838 | - | 752  | 30 | 26 | 26 | 28 | 28 | 87%  | 87%  | 93%  | 93%  | P | P | P | P | U |
| b1918 | yecS | 1995835 | 1996503 | - | 668  | 26 | 26 | 26 | 26 | 26 | 100% | 100% | 100% | 100% | P | P | P | P | U |
| b1919 | dcyD | 1996518 | 1997504 | - | 986  | 39 | 39 | 39 | 39 | 39 | 100% | 100% | 100% | 100% | P | P | P | P |   |
| b1920 | fliY | 1997609 | 1998409 | - | 800  | 32 | 32 | 32 | 32 | 32 | 100% | 100% | 100% | 100% | P | P | P | P |   |
| b1921 | fliZ | 1998497 | 1999048 | - | 551  | 22 | 1  | 1  | 2  | 4  | 5%   | 5%   | 9%   | 18%  | P | P | P | P | U |
| b1922 | fliA | 1999094 | 1999813 | - | 719  | 29 | 0  | 6  | 6  | 6  | 0%   | 21%  | 21%  | 21%  | A | P | P | P |   |
| b1923 | fliC | 2000134 | 2001630 | - | 1496 | 60 | 26 | 57 | 60 | 60 | 43%  | 95%  | 100% | 100% | P | P | P | P |   |
| b1928 | yedD | 2005701 | 2006114 | - | 413  | 16 | 16 | 16 | 16 | 16 | 100% | 100% | 100% | 100% | P | P | P | P | U |
| b4495 | yedN | 2009247 | 2010375 | - | 1128 | 46 | 0  | 0  | 0  | 0  | 0%   | 0%   | 0%   | 0%   | A | A | A | A | U |
| b1937 | fliE | 2010724 | 2011038 | - | 314  | 12 | 0  | 0  | 0  | 0  | 0%   | 0%   | 0%   | 0%   | A | A | A | A |   |
| b1952 | dsrB | 2022659 | 2022847 | - | 188  | 7  | 6  | 6  | 6  | 7  | 86%  | 86%  | 86%  | 100% | P | P | P | P | U |
| b1954 | dsrA | 2023251 | 2023337 | - | 86   | 4  | 2  | 2  | 2  | 2  | 50%  | 50%  | 50%  | 50%  | P | P | P | P |   |
| b1956 | yedQ | 2024347 | 2026041 | - | 1694 | 68 | 41 | 41 | 50 | 52 | 60%  | 60%  | 74%  | 76%  | P | P | P | P | U |
| b1957 | yodC | 2026212 | 2026394 | - | 182  | 7  | 7  | 7  | 7  | 7  | 100% | 100% | 100% | 100% | P | P | P | P | U |
| b1958 | yedI | 2026473 | 2027390 | - | 917  | 37 | 37 | 37 | 37 | 37 | 100% | 100% | 100% | 100% | P | P | P | P | U |
| b1960 | vsr  | 2028472 | 2028942 | - | 470  | 19 | 11 | 11 | 11 | 11 | 58%  | 58%  | 58%  | 58%  | P | P | P | P |   |
| b1961 | dcm  | 2028923 | 2030341 | - | 1418 | 57 | 54 | 54 | 54 | 54 | 95%  | 95%  | 95%  | 95%  | P | P | P | P |   |
| b1962 | yedJ | 2030408 | 2031103 | - | 695  | 28 | 28 | 28 | 28 | 28 | 100% | 100% | 100% | 100% | P | P | P | P | U |
| b1963 | yedR | 2031143 | 2031508 | - | 365  | 15 | 13 | 13 | 13 | 13 | 87%  | 87%  | 87%  | 87%  | P | P | P | P | U |
| b1968 | yedV | 2034818 | 2036176 | - | 1358 | 54 | 18 | 18 | 18 | 18 | 33%  | 33%  | 33%  | 33%  | P | P | P | P | U |
| b1969 | yedW | 2036176 | 2036847 | - | 671  | 27 | 21 | 21 | 21 | 21 | 78%  | 78%  | 78%  | 78%  | P | P | P | P | U |
| b1975 | serU | 2041492 | 2041581 | - | 89   | 3  | 3  | 3  | 3  | 3  | 100% | 100% | 100% | 100% | P | P | P | P |   |
| b4497 | yeeL | 2050300 | 2051352 | - | 1052 | 42 | 0  | 0  | 4  | 4  | 0%   | 0%   | 10%  | 10%  | A | A | P | P | U |
| b1984 | asnW | 2056051 | 2056126 | - | 75   | 3  | 3  | 3  | 3  | 3  | 100% | 100% | 100% | 100% | P | P | P | P |   |
| b1985 | yeeO | 2056227 | 2057870 | - | 1643 | 66 | 11 | 27 | 38 | 41 | 17%  | 41%  | 58%  | 62%  | P | P | P | P | U |
| b1987 | cbl  | 2057988 | 2058938 | - | 950  | 38 | 36 | 36 | 36 | 38 | 95%  | 95%  | 95%  | 100% | P | P | P | P |   |
| b1988 | nac  | 2059040 | 2059957 | - | 917  | 36 | 0  | 0  | 1  | 36 | 0%   | 0%   | 3%   | 100% | A | A | P | P |   |
| b1990 | erfK | 2060415 | 2061347 | - | 932  | 37 | 25 | 29 | 30 | 35 | 68%  | 78%  | 81%  | 95%  | P | P | P | P | U |
| b1991 | cobT | 2061412 | 2062491 | - | 1079 | 43 | 41 | 42 | 42 | 43 | 95%  | 98%  | 98%  | 100% | P | P | P | P |   |
| b1992 | cobS | 2062503 | 2063246 | - | 743  | 30 | 30 | 30 | 30 | 30 | 100% | 100% | 100% | 100% | P | P | P | P |   |
| b1993 | cobU | 2063243 | 2063788 | - | 545  | 22 | 21 | 21 | 21 | 21 | 95%  | 95%  | 95%  | 95%  | P | P | P | P |   |
| b4639 | yeeH | 2064092 | 2064178 | - | 86   | 3  | 0  | 1  | 1  | 1  | 0%   | 33%  | 33%  | 33%  | A | P | P | P | U |
| b1994 | insH | 2064329 | 2065345 | - | 1016 | 41 | 41 | 41 | 41 | 41 | 100% | 100% | 100% | 100% | P | P | P | P |   |
| b4640 | yoeG | 2065384 | 2065916 | - | 532  | 22 | 17 | 20 | 20 | 20 | 77%  | 91%  | 91%  | 91%  | P | P | P | P | U |
| b4641 | yoeH | 2066285 | 2066443 | - | 158  | 6  | 5  | 5  | 5  | 5  | 83%  | 83%  | 83%  | 83%  | P | P | P | P | U |
| b1996 | insD | 2066976 | 2067881 | - | 905  | 36 | 36 | 36 | 36 | 36 | 100% | 100% | 100% | 100% | P | P | P | P |   |
| b1997 | insC | 2067839 | 2068204 | - | 365  | 14 | 14 | 14 | 14 | 14 | 100% | 100% | 100% | 100% | P | P | P | P |   |
| b4642 | yoeD | 2076573 | 2076701 | - | 128  | 5  | 0  | 0  | 0  | 0  | 0%   | 0%   | 0%   | 0%   | A | A | A | A | U |
| b2007 | yeeX | 2077056 | 2077385 | - | 329  | 13 | 13 | 13 | 13 | 13 | 100% | 100% | 100% | 100% | P | P | P | P | U |
| b2008 | yeeA | 2077557 | 2078615 | - | 1058 | 43 | 27 | 27 | 29 | 31 | 63%  | 63%  | 67%  | 72%  | P | P | P | P | U |
| b2009 | sbmC | 2078813 | 2079286 | - | 473  | 19 | 19 | 19 | 19 | 19 | 100% | 100% | 100% | 100% | P | P | P | P |   |
| b2010 | dacD | 2079405 | 2080571 | - | 1166 | 47 | 13 | 14 | 18 | 19 | 28%  | 30%  | 38%  | 40%  | P | P | P | P |   |
| b2012 | yeeD | 2082250 | 2082477 | - | 227  | 9  | 9  | 9  | 9  | 9  | 100% | 100% | 100% | 100% | P | P | P | P | U |
| b2013 | yeeE | 2082491 | 2083549 | - | 1058 | 42 | 41 | 41 | 41 | 41 | 98%  | 98%  | 98%  | 98%  | P | P | P | P | U |
| b2014 | yeeF | 2083728 | 2085086 | - | 1358 | 55 | 55 | 55 | 55 | 55 | 100% | 100% | 100% | 100% | P | P | P | P | U |

|       |      |         |         |   |      |    |    |    |    |    |      |      |      |      |   |   |   |   |   |
|-------|------|---------|---------|---|------|----|----|----|----|----|------|------|------|------|---|---|---|---|---|
| b2015 | yeeY | 2085353 | 2086282 | - | 929  | 37 | 9  | 21 | 37 | 37 | 24%  | 57%  | 100% | 100% | P | P | P | P | U |
| b2016 | yeeZ | 2086328 | 2087152 | - | 824  | 33 | 32 | 32 | 33 | 33 | 97%  | 97%  | 100% | 100% | P | P | P | P | U |
| b4539 | yoeB | 2087235 | 2087489 | - | 254  | 11 | 11 | 11 | 11 | 11 | 100% | 100% | 100% | 100% | P | P | P | P |   |
| b2017 | yefM | 2087486 | 2087737 | - | 251  | 11 | 11 | 11 | 11 | 11 | 100% | 100% | 100% | 100% | P | P | P | P |   |
| b2027 | cld  | 2095345 | 2096325 | - | 980  | 40 | 39 | 39 | 39 | 39 | 98%  | 98%  | 98%  | 98%  | P | P | P | P |   |
| b2028 | ugd  | 2096471 | 2097637 | - | 1166 | 47 | 20 | 20 | 20 | 20 | 43%  | 43%  | 43%  | 43%  | P | P | P | P |   |
| b2029 | gnd  | 2097886 | 2099292 | - | 1406 | 56 | 56 | 56 | 56 | 56 | 100% | 100% | 100% | 100% | P | P | P | P |   |
| b4571 | wbbL | 2099420 | 2099768 | - | 348  | 14 | 13 | 13 | 13 | 13 | 93%  | 93%  | 93%  | 93%  | P | P | P | P | U |
| b2030 | insH | 2099919 | 2100935 | - | 1016 | 41 | 41 | 41 | 41 | 41 | 100% | 100% | 100% | 100% | P | P | P | P |   |
| b4571 | wbbL | 2100968 | 2101413 | - | 445  | 18 | 16 | 16 | 16 | 16 | 89%  | 89%  | 89%  | 89%  | P | P | P | P | U |
| b2032 | wbbK | 2101415 | 2102533 | - | 1118 | 45 | 44 | 44 | 44 | 44 | 98%  | 98%  | 98%  | 98%  | P | P | P | P |   |
| b2033 | wbbJ | 2102518 | 2103108 | - | 590  | 24 | 24 | 24 | 24 | 24 | 100% | 100% | 100% | 100% | P | P | P | P | U |
| b2034 | wbbI | 2103089 | 2104081 | - | 992  | 40 | 40 | 40 | 40 | 40 | 100% | 100% | 100% | 100% | P | P | P | P | U |
| b2035 | rfc  | 2104084 | 2105250 | - | 1166 | 46 | 42 | 42 | 42 | 43 | 91%  | 91%  | 91%  | 93%  | P | P | P | P |   |
| b2036 | glf  | 2105250 | 2106353 | - | 1103 | 44 | 43 | 43 | 43 | 43 | 98%  | 98%  | 98%  | 98%  | P | P | P | P |   |
| b2037 | rfbX | 2106361 | 2107608 | - | 1247 | 50 | 48 | 48 | 48 | 49 | 96%  | 96%  | 96%  | 98%  | P | P | P | P | U |
| b2038 | rfbC | 2107605 | 2108162 | - | 557  | 23 | 23 | 23 | 23 | 23 | 100% | 100% | 100% | 100% | P | P | P | P |   |
| b2039 | rfbA | 2108162 | 2109043 | - | 881  | 35 | 35 | 35 | 35 | 35 | 100% | 100% | 100% | 100% | P | P | P | P |   |
| b2040 | rfbD | 2109101 | 2110000 | - | 899  | 36 | 36 | 36 | 36 | 36 | 100% | 100% | 100% | 100% | P | P | P | P |   |
| b2041 | rfbB | 2110000 | 2111085 | - | 1085 | 44 | 44 | 44 | 44 | 44 | 100% | 100% | 100% | 100% | P | P | P | P |   |
| b2042 | galF | 2111458 | 2112351 | - | 893  | 36 | 36 | 36 | 36 | 36 | 100% | 100% | 100% | 100% | P | P | P | P | U |
| b2043 | wcaM | 2112526 | 2113920 | - | 1394 | 56 | 7  | 9  | 10 | 14 | 13%  | 16%  | 18%  | 25%  | P | P | P | P | U |
| b2044 | wcaL | 2113931 | 2115151 | - | 1220 | 49 | 0  | 0  | 2  | 2  | 0%   | 0%   | 4%   | 4%   | A | A | P | P | U |
| b2045 | wcaK | 2115148 | 2116428 | - | 1280 | 51 | 0  | 0  | 0  | 0  | 0%   | 0%   | 0%   | 0%   | A | A | A | A | U |
| b2046 | wzxC | 2116704 | 2118182 | - | 1478 | 59 | 0  | 0  | 3  | 3  | 0%   | 0%   | 5%   | 5%   | A | A | P | P |   |
| b2047 | wcaJ | 2118184 | 2119578 | - | 1394 | 56 | 0  | 0  | 5  | 5  | 0%   | 0%   | 9%   | 9%   | A | A | P | P | U |
| b2048 | cpsG | 2119633 | 2121003 | - | 1370 | 55 | 0  | 0  | 3  | 3  | 0%   | 0%   | 5%   | 5%   | A | A | P | P |   |
| b2049 | cpsB | 2121108 | 2122544 | - | 1436 | 58 | 0  | 0  | 2  | 2  | 0%   | 0%   | 3%   | 3%   | A | A | P | P |   |
| b2050 | wcaI | 2122547 | 2123770 | - | 1223 | 49 | 0  | 0  | 2  | 2  | 0%   | 0%   | 4%   | 4%   | A | A | P | P | U |
| b2051 | gmm  | 2123767 | 2124246 | - | 479  | 19 | 0  | 0  | 1  | 1  | 0%   | 0%   | 5%   | 5%   | A | A | P | P |   |
| b2052 | fcl  | 2124249 | 2125214 | - | 965  | 39 | 0  | 0  | 2  | 2  | 0%   | 0%   | 5%   | 5%   | A | A | P | P |   |
| b2053 | gmd  | 2125217 | 2126338 | - | 1121 | 45 | 0  | 0  | 2  | 2  | 0%   | 0%   | 4%   | 4%   | A | A | P | P |   |
| b2054 | wcaF | 2126364 | 2126912 | - | 548  | 21 | 0  | 0  | 1  | 1  | 0%   | 0%   | 5%   | 5%   | A | A | P | P | U |
| b2055 | wcaE | 2126928 | 2127674 | - | 746  | 30 | 0  | 0  | 0  | 0  | 0%   | 0%   | 0%   | 0%   | A | A | A | A | U |
| b2056 | wcaD | 2127685 | 2128902 | - | 1217 | 49 | 0  | 0  | 0  | 0  | 0%   | 0%   | 0%   | 0%   | A | A | A | A | U |
| b2057 | wcaC | 2128877 | 2130094 | - | 1217 | 49 | 0  | 0  | 0  | 0  | 0%   | 0%   | 0%   | 0%   | A | A | A | A | U |
| b2058 | wcaB | 2130091 | 2130579 | - | 488  | 20 | 0  | 0  | 0  | 0  | 0%   | 0%   | 0%   | 0%   | A | A | A | A | U |
| b2059 | wcaA | 2130582 | 2131421 | - | 839  | 34 | 0  | 0  | 0  | 0  | 0%   | 0%   | 0%   | 0%   | A | A | A | A | U |
| b2060 | wzc  | 2131514 | 2133676 | - | 2162 | 87 | 0  | 0  | 0  | 0  | 0%   | 0%   | 0%   | 0%   | A | A | A | A |   |
| b2061 | wzb  | 2133679 | 2134122 | - | 443  | 18 | 0  | 0  | 0  | 0  | 0%   | 0%   | 0%   | 0%   | A | A | A | A |   |
| b2062 | wza  | 2134128 | 2135267 | - | 1139 | 46 | 0  | 0  | 0  | 0  | 0%   | 0%   | 0%   | 0%   | A | A | A | A |   |
| b2064 | asmA | 2137783 | 2139636 | - | 1853 | 74 | 71 | 71 | 71 | 71 | 96%  | 96%  | 96%  | 96%  | P | P | P | P | U |
| b2065 | dcd  | 2139658 | 2140239 | - | 581  | 23 | 23 | 23 | 23 | 23 | 100% | 100% | 100% | 100% | P | P | P | P |   |
| b2066 | udk  | 2140331 | 2140972 | - | 641  | 26 | 26 | 26 | 26 | 26 | 100% | 100% | 100% | 100% | P | P | P | P |   |
| b2068 | alkA | 2144716 | 2145564 | - | 848  | 34 | 13 | 15 | 22 | 22 | 38%  | 44%  | 65%  | 65%  | P | P | P | P |   |
| b2070 | yegI | 2147063 | 2149009 | - | 1946 | 78 | 0  | 1  | 5  | 6  | 0%   | 1%   | 6%   | 8%   | A | P | P | P | U |

|       |      |         |         |   |      |    |    |    |    |    |      |      |      |      |   |   |   |   |   |
|-------|------|---------|---------|---|------|----|----|----|----|----|------|------|------|------|---|---|---|---|---|
| b2072 | yegK | 2149735 | 2150496 | - | 761  | 31 | 0  | 0  | 4  | 4  | 0%   | 0%   | 13%  | 13%  | A | A | P | P | U |
| b2073 | yegL | 2150493 | 2151152 | - | 659  | 26 | 0  | 0  | 0  | 0  | 0%   | 0%   | 0%   | 0%   | A | A | A | A | U |
| b2082 | ogrK | 2165326 | 2165544 | - | 218  | 9  | 8  | 9  | 9  | 9  | 89%  | 100% | 100% | 100% | P | P | P | P |   |
| b2083 | yegZ | 2165626 | 2165838 | - | 212  | 8  | 0  | 1  | 1  | 1  | 0%   | 13%  | 13%  | 13%  | A | P | P | P | U |
| b2085 | yegR | 2166013 | 2166330 | - | 317  | 13 | 0  | 0  | 0  | 0  | 0%   | 0%   | 0%   | 0%   | A | A | A | A | U |
| b4498 | gatR | 2167717 | 2168191 | - | 474  | 19 | 0  | 2  | 2  | 2  | 0%   | 11%  | 11%  | 11%  | A | P | P | P | U |
| b4498 | gatR | 2169453 | 2169751 | - | 298  | 12 | 12 | 12 | 12 | 12 | 100% | 100% | 100% | 100% | P | P | P | P | U |
| b2091 | gatD | 2169857 | 2170897 | - | 1040 | 42 | 42 | 42 | 42 | 42 | 100% | 100% | 100% | 100% | P | P | P | P |   |
| b2092 | gatC | 2170945 | 2172300 | - | 1355 | 54 | 54 | 54 | 54 | 54 | 100% | 100% | 100% | 100% | P | P | P | P |   |
| b2093 | gatB | 2172304 | 2172588 | - | 284  | 11 | 11 | 11 | 11 | 11 | 100% | 100% | 100% | 100% | P | P | P | P |   |
| b2094 | gatA | 2172619 | 2173071 | - | 452  | 18 | 18 | 18 | 18 | 18 | 100% | 100% | 100% | 100% | P | P | P | P |   |
| b2095 | gatZ | 2173081 | 2174343 | - | 1262 | 51 | 51 | 51 | 51 | 51 | 100% | 100% | 100% | 100% | P | P | P | P |   |
| b2096 | gatY | 2174372 | 2175226 | - | 854  | 34 | 34 | 34 | 34 | 34 | 100% | 100% | 100% | 100% | P | P | P | P |   |
| b2097 | fbaB | 2175534 | 2176586 | - | 1052 | 42 | 42 | 42 | 42 | 42 | 100% | 100% | 100% | 100% | P | P | P | P |   |
| b2101 | yegW | 2180057 | 2180803 | - | 746  | 30 | 25 | 25 | 25 | 25 | 83%  | 83%  | 83%  | 83%  | P | P | P | P | U |
| b2102 | yegX | 2180855 | 2181673 | - | 818  | 33 | 14 | 15 | 15 | 16 | 42%  | 45%  | 45%  | 48%  | P | P | P | P | U |
| b2103 | thiD | 2181738 | 2182538 | - | 800  | 32 | 32 | 32 | 32 | 32 | 100% | 100% | 100% | 100% | P | P | P | P |   |
| b2104 | thiM | 2182535 | 2183323 | - | 788  | 32 | 32 | 32 | 32 | 32 | 100% | 100% | 100% | 100% | P | P | P | P |   |
| b2105 | rcnR | 2183546 | 2183818 | - | 272  | 11 | 9  | 9  | 9  | 9  | 82%  | 82%  | 82%  | 82%  | P | P | P | P | U |
| b2108 | yehA | 2185402 | 2186436 | - | 1034 | 41 | 0  | 0  | 1  | 1  | 0%   | 0%   | 2%   | 2%   | A | A | P | P | U |
| b2109 | yehB | 2186452 | 2188932 | - | 2480 | 99 | 0  | 3  | 3  | 3  | 0%   | 3%   | 3%   | 3%   | A | P | P | P | U |
| b2110 | yehC | 2188948 | 2189667 | - | 719  | 29 | 0  | 0  | 0  | 0  | 0%   | 0%   | 0%   | 0%   | A | A | A | A | U |
| b2111 | yehD | 2189702 | 2190244 | - | 542  | 22 | 0  | 6  | 6  | 6  | 0%   | 27%  | 27%  | 27%  | A | P | P | P | U |
| b2112 | yehE | 2190537 | 2190818 | - | 281  | 12 | 9  | 9  | 10 | 12 | 75%  | 75%  | 83%  | 100% | P | P | P | P | U |
| b2113 | mrp  | 2191081 | 2192190 | - | 1109 | 44 | 44 | 44 | 44 | 44 | 100% | 100% | 100% | 100% | P | P | P | P |   |
| b2124 | yehS | 2209748 | 2210218 | - | 470  | 19 | 14 | 14 | 14 | 14 | 74%  | 74%  | 74%  | 74%  | P | P | P | P | U |
| b2125 | yehT | 2210265 | 2210984 | - | 719  | 29 | 25 | 25 | 25 | 25 | 86%  | 86%  | 86%  | 86%  | P | P | P | P | U |
| b2126 | yehU | 2210981 | 2212666 | - | 1685 | 67 | 31 | 31 | 31 | 35 | 46%  | 46%  | 46%  | 52%  | P | P | P | P | U |
| b2128 | yehW | 2213767 | 2214498 | - | 731  | 30 | 12 | 12 | 12 | 15 | 40%  | 40%  | 40%  | 50%  | P | P | P | P | U |
| b2129 | yehX | 2214503 | 2215429 | - | 926  | 37 | 27 | 27 | 27 | 29 | 73%  | 73%  | 73%  | 78%  | P | P | P | P | U |
| b2130 | yehY | 2215422 | 2216579 | - | 1157 | 46 | 16 | 16 | 16 | 19 | 35%  | 35%  | 35%  | 41%  | P | P | P | P | U |
| b2131 | osmF | 2216586 | 2217503 | - | 917  | 37 | 35 | 35 | 35 | 37 | 95%  | 95%  | 95%  | 100% | P | P | P | P | U |
| b2132 | bglX | 2217714 | 2220011 | - | 2297 | 92 | 92 | 92 | 92 | 92 | 100% | 100% | 100% | 100% | P | P | P | P |   |
| b2134 | pbpG | 2221960 | 2222892 | - | 932  | 37 | 35 | 36 | 36 | 36 | 95%  | 97%  | 97%  | 97%  | P | P | P | P |   |
| b2135 | yohC | 2223066 | 2223653 | - | 587  | 24 | 8  | 12 | 24 | 24 | 33%  | 50%  | 100% | 100% | P | P | P | P | U |
| b2137 | yohF | 2224531 | 2225292 | - | 761  | 30 | 17 | 21 | 22 | 27 | 57%  | 70%  | 73%  | 90%  | P | P | P | P | U |
| b2139 | mdtQ | 2225345 | 2226780 | - | 1435 | 57 | 0  | 1  | 1  | 1  | 0%   | 2%   | 2%   | 2%   | A | P | P | P | U |
| b2140 | dusC | 2227460 | 2228407 | - | 947  | 38 | 25 | 25 | 25 | 25 | 66%  | 66%  | 66%  | 66%  | P | P | P | P |   |
| b2148 | mgIC | 2234765 | 2235775 | - | 1010 | 41 | 28 | 28 | 28 | 28 | 68%  | 68%  | 68%  | 68%  | P | P | P | P |   |
| b2149 | mgIA | 2235791 | 2237311 | - | 1520 | 61 | 45 | 45 | 45 | 45 | 74%  | 74%  | 74%  | 74%  | P | P | P | P |   |
| b2150 | mgIB | 2237372 | 2238370 | - | 998  | 39 | 39 | 39 | 39 | 39 | 100% | 100% | 100% | 100% | P | P | P | P |   |
| b2151 | galS | 2238650 | 2239690 | - | 1040 | 41 | 0  | 0  | 3  | 3  | 0%   | 0%   | 7%   | 7%   | A | A | P | P |   |
| b2152 | yeiB | 2239832 | 2240989 | - | 1157 | 46 | 36 | 36 | 36 | 36 | 78%  | 78%  | 78%  | 78%  | P | P | P | P | U |
| b2153 | folE | 2241006 | 2241674 | - | 668  | 27 | 27 | 27 | 27 | 27 | 100% | 100% | 100% | 100% | P | P | P | P |   |
| b2155 | cirA | 2242800 | 2244791 | - | 1991 | 79 | 55 | 55 | 55 | 76 | 70%  | 70%  | 70%  | 96%  | P | P | P | P |   |
| b2156 | lysP | 2245085 | 2246554 | - | 1469 | 59 | 59 | 59 | 59 | 59 | 100% | 100% | 100% | 100% | P | P | P | P |   |



|       |      |         |         |   |      |     |     |     |     |     |      |      |      |      |   |   |   |   |   |
|-------|------|---------|---------|---|------|-----|-----|-----|-----|-----|------|------|------|------|---|---|---|---|---|
| b2157 | yeiE | 2246759 | 2247640 | - | 881  | 35  | 26  | 26  | 26  | 26  | 74%  | 74%  | 74%  | 74%  | P | P | P | P | U |
| b2161 | nupX | 2250917 | 2252167 | - | 1250 | 50  | 0   | 0   | 5   | 5   | 0%   | 0%   | 10%  | 10%  | A | A | P | P | U |
| b2162 | rihB | 2252267 | 2253208 | - | 941  | 38  | 0   | 0   | 1   | 1   | 0%   | 0%   | 3%   | 3%   | A | A | P | P |   |
| b2164 | yeiM | 2254107 | 2255357 | - | 1250 | 50  | 0   | 2   | 5   | 5   | 0%   | 4%   | 10%  | 10%  | A | P | P | P | U |
| b2165 | yeiN | 2255451 | 2256389 | - | 938  | 37  | 0   | 0   | 1   | 1   | 0%   | 0%   | 3%   | 3%   | A | A | P | P | U |
| b2166 | yeiC | 2256377 | 2257318 | - | 941  | 37  | 0   | 2   | 2   | 2   | 0%   | 5%   | 5%   | 5%   | A | P | P | P | U |
| b2167 | fruA | 2257741 | 2259432 | - | 1691 | 68  | 65  | 68  | 68  | 68  | 96%  | 100% | 100% | 100% | P | P | P | P |   |
| b2168 | fruK | 2259449 | 2260387 | - | 938  | 37  | 37  | 37  | 37  | 37  | 100% | 100% | 100% | 100% | P | P | P | P |   |
| b2169 | fruB | 2260387 | 2261517 | - | 1130 | 45  | 38  | 45  | 45  | 45  | 84%  | 100% | 100% | 100% | P | P | P | P |   |
| b4502 | yeiW | 2263063 | 2263317 | - | 254  | 10  | 0   | 0   | 0   | 0   | 0%   | 0%   | 0%   | 0%   | A | A | A | A | U |
| b2181 | yejG | 2275915 | 2276259 | - | 344  | 14  | 14  | 14  | 14  | 14  | 100% | 100% | 100% | 100% | P | P | P | P | U |
| b2182 | bcr  | 2276592 | 2277782 | - | 1190 | 48  | 41  | 41  | 41  | 41  | 85%  | 85%  | 85%  | 85%  | P | P | P | P |   |
| b2183 | rsuA | 2277810 | 2278505 | - | 695  | 28  | 28  | 28  | 28  | 28  | 100% | 100% | 100% | 100% | P | P | P | P |   |
| b2186 | yejK | 2280962 | 2281969 | - | 1007 | 40  | 40  | 40  | 40  | 40  | 100% | 100% | 100% | 100% | P | P | P | P |   |
| b2190 | yejO | 2284412 | 2286936 | - | 2524 | 101 | 66  | 68  | 71  | 77  | 65%  | 67%  | 70%  | 76%  | P | P | P | P | U |
| b2192 | insH | 2287087 | 2288103 | - | 1016 | 41  | 41  | 41  | 41  | 41  | 100% | 100% | 100% | 100% | P | P | P | P |   |
| b2190 | yejO | 2288136 | 2288202 | - | 66   | 3   | 0   | 0   | 0   | 0   | 0%   | 0%   | 0%   | 0%   | A | A | A | A | U |
| b2194 | ccmH | 2289380 | 2290432 | - | 1052 | 42  | 10  | 10  | 10  | 10  | 24%  | 24%  | 24%  | 24%  | P | P | P | P |   |
| b2195 | ccmG | 2290429 | 2290986 | - | 557  | 22  | 5   | 5   | 5   | 5   | 23%  | 23%  | 23%  | 23%  | P | P | P | P |   |
| b2196 | ccmF | 2290983 | 2292926 | - | 1943 | 78  | 21  | 21  | 21  | 21  | 27%  | 27%  | 27%  | 27%  | P | P | P | P |   |
| b2197 | ccmE | 2292923 | 2293402 | - | 479  | 19  | 16  | 16  | 16  | 16  | 84%  | 84%  | 84%  | 84%  | P | P | P | P |   |
| b2198 | ccmD | 2293399 | 2293608 | - | 209  | 8   | 4   | 4   | 4   | 4   | 50%  | 50%  | 50%  | 50%  | P | P | P | P |   |
| b2199 | ccmC | 2293605 | 2294342 | - | 737  | 30  | 15  | 15  | 15  | 15  | 50%  | 50%  | 50%  | 50%  | P | P | P | P |   |
| b2200 | ccmB | 2294384 | 2295046 | - | 662  | 27  | 5   | 5   | 5   | 5   | 19%  | 19%  | 19%  | 19%  | P | P | P | P |   |
| b2201 | ccmA | 2295043 | 2295666 | - | 623  | 25  | 9   | 10  | 11  | 11  | 36%  | 40%  | 44%  | 44%  | P | P | P | P |   |
| b2202 | napC | 2295679 | 2296281 | - | 602  | 24  | 9   | 11  | 12  | 12  | 38%  | 46%  | 50%  | 50%  | P | P | P | P |   |
| b2203 | napB | 2296291 | 2296740 | - | 449  | 18  | 1   | 2   | 2   | 2   | 6%   | 11%  | 11%  | 11%  | P | P | P | P |   |
| b2204 | napH | 2296737 | 2297600 | - | 863  | 35  | 1   | 1   | 2   | 2   | 3%   | 3%   | 6%   | 6%   | P | P | P | P |   |
| b2205 | napG | 2297587 | 2298282 | - | 695  | 28  | 1   | 1   | 2   | 2   | 4%   | 4%   | 7%   | 7%   | P | P | P | P |   |
| b2206 | napA | 2298289 | 2300775 | - | 2486 | 99  | 6   | 8   | 8   | 8   | 6%   | 8%   | 8%   | 8%   | P | P | P | P |   |
| b2207 | napD | 2300772 | 2301035 | - | 263  | 10  | 1   | 1   | 1   | 2   | 10%  | 10%  | 10%  | 20%  | P | P | P | P |   |
| b2208 | napF | 2301025 | 2301519 | - | 494  | 20  | 0   | 0   | 0   | 0   | 0%   | 0%   | 0%   | 0%   | A | A | A | A | U |
| b2210 | mgo  | 2303130 | 2304776 | - | 1646 | 66  | 65  | 65  | 65  | 65  | 98%  | 98%  | 98%  | 98%  | P | P | P | P |   |
| b2211 | yojI | 2304994 | 2306637 | - | 1643 | 66  | 62  | 62  | 62  | 62  | 94%  | 94%  | 94%  | 94%  | P | P | P | P | U |
| b2212 | alkB | 2306713 | 2307363 | - | 650  | 26  | 4   | 4   | 13  | 13  | 15%  | 15%  | 50%  | 50%  | P | P | P | P |   |
| b2213 | ada  | 2307363 | 2308427 | - | 1064 | 43  | 17  | 17  | 41  | 41  | 40%  | 40%  | 95%  | 95%  | P | P | P | P |   |
| b2214 | apbE | 2308501 | 2309556 | - | 1055 | 42  | 10  | 10  | 10  | 10  | 24%  | 24%  | 24%  | 24%  | P | P | P | P | U |
| b2215 | ompC | 2309668 | 2310771 | - | 1103 | 44  | 44  | 44  | 44  | 44  | 100% | 100% | 100% | 100% | P | P | P | P |   |
| b2218 | rscC | 2315049 | 2317898 | - | 2849 | 114 | 102 | 102 | 102 | 102 | 89%  | 89%  | 89%  | 89%  | P | P | P | P |   |
| b2225 | yfaP | 2325389 | 2326165 | - | 776  | 31  | 0   | 0   | 10  | 10  | 0%   | 0%   | 32%  | 32%  | A | A | P | P | U |
| b2226 | yfaQ | 2326170 | 2327819 | - | 1649 | 66  | 0   | 0   | 1   | 1   | 0%   | 0%   | 2%   | 2%   | A | A | P | P | U |
| b4500 | yfaS | 2327820 | 2332424 | - | 4604 | 184 | 0   | 0   | 1   | 1   | 0%   | 0%   | 1%   | 1%   | A | A | P | P | U |
| b2229 | yfaT | 2332358 | 2332981 | - | 623  | 25  | 0   | 0   | 0   | 0   | 0%   | 0%   | 0%   | 0%   | A | A | A | A | U |
| b2230 | yfaA | 2332978 | 2334666 | - | 1688 | 67  | 0   | 0   | 0   | 0   | 0%   | 0%   | 0%   | 0%   | A | A | A | A | U |
| b2231 | gyrA | 2334815 | 2337442 | - | 2627 | 105 | 105 | 105 | 105 | 105 | 100% | 100% | 100% | 100% | P | P | P | P |   |
| b2233 | yfaL | 2338439 | 2342191 | - | 3752 | 150 | 50  | 52  | 54  | 55  | 33%  | 35%  | 36%  | 37%  | P | P | P | P |   |

|       |      |         |         |   |      |     |     |     |     |     |      |      |      |      |   |   |   |   |   |
|-------|------|---------|---------|---|------|-----|-----|-----|-----|-----|------|------|------|------|---|---|---|---|---|
| b4605 | ypaB | 2342616 | 2342759 | - | 143  | 6   | 0   | 0   | 0   | 0   | 0%   | 0%   | 0%   | 0%   | A | A | A | A | U |
| b2237 | inaA | 2346844 | 2347494 | - | 650  | 26  | 20  | 20  | 21  | 22  | 77%  | 77%  | 81%  | 85%  | P | P | P | P | U |
| b2239 | glpQ | 2347957 | 2349033 | - | 1076 | 43  | 25  | 28  | 29  | 31  | 58%  | 65%  | 67%  | 72%  | P | P | P | P |   |
| b2240 | glpT | 2349038 | 2350396 | - | 1358 | 54  | 11  | 12  | 13  | 15  | 20%  | 22%  | 24%  | 28%  | P | P | P | P |   |
| b2245 | yfaU | 2356064 | 2356867 | - | 803  | 32  | 0   | 7   | 8   | 8   | 0%   | 22%  | 25%  | 25%  | A | P | P | P | U |
| b2246 | yfaV | 2356885 | 2358174 | - | 1289 | 51  | 0   | 3   | 4   | 4   | 0%   | 6%   | 8%   | 8%   | A | P | P | P | U |
| b2247 | yfaW | 2358231 | 2359448 | - | 1217 | 48  | 0   | 0   | 9   | 10  | 0%   | 0%   | 19%  | 21%  | A | A | P | P | U |
| b2248 | yfaX | 2359451 | 2360233 | - | 782  | 32  | 0   | 0   | 3   | 4   | 0%   | 0%   | 9%   | 13%  | A | A | P | P | U |
| b2249 | yfaY | 2360453 | 2361655 | - | 1202 | 49  | 36  | 36  | 36  | 37  | 73%  | 73%  | 73%  | 76%  | P | P | P | P | U |
| b2250 | yfaZ | 2361755 | 2362297 | - | 542  | 21  | 13  | 13  | 14  | 14  | 62%  | 62%  | 67%  | 67%  | P | P | P | P | U |
| b2252 | ais  | 2363040 | 2363642 | - | 602  | 24  | 0   | 0   | 0   | 0   | 0%   | 0%   | 0%   | 0%   | A | A | A | A | U |
| b2259 | pmrD | 2371294 | 2371560 | - | 266  | 11  | 10  | 11  | 11  | 11  | 91%  | 100% | 100% | 100% | P | P | P | P |   |
| b2260 | menE | 2371670 | 2373025 | - | 1355 | 54  | 33  | 33  | 33  | 34  | 61%  | 61%  | 61%  | 63%  | P | P | P | P |   |
| b2261 | menC | 2373022 | 2373984 | - | 962  | 39  | 39  | 39  | 39  | 39  | 100% | 100% | 100% | 100% | P | P | P | P |   |
| b2262 | menB | 2373984 | 2374841 | - | 857  | 34  | 34  | 34  | 34  | 34  | 100% | 100% | 100% | 100% | P | P | P | P |   |
| b2263 | yfbB | 2374856 | 2375614 | - | 758  | 30  | 19  | 19  | 19  | 19  | 63%  | 63%  | 63%  | 63%  | P | P | P | P | U |
| b2264 | menD | 2375611 | 2377281 | - | 1670 | 67  | 57  | 57  | 57  | 57  | 85%  | 85%  | 85%  | 85%  | P | P | P | P |   |
| b2265 | menF | 2377370 | 2378665 | - | 1295 | 52  | 49  | 49  | 49  | 49  | 94%  | 94%  | 94%  | 94%  | P | P | P | P |   |
| b2266 | elaB | 2378744 | 2379049 | - | 305  | 12  | 12  | 12  | 12  | 12  | 100% | 100% | 100% | 100% | P | P | P | P | U |
| b2267 | elaA | 2379104 | 2379565 | - | 461  | 19  | 18  | 18  | 18  | 19  | 95%  | 95%  | 95%  | 100% | P | P | P | P | U |
| b2270 | yfbK | 2382017 | 2383744 | - | 1727 | 69  | 0   | 0   | 0   | 9   | 0%   | 0%   | 0%   | 13%  | A | A | A | P | U |
| b2273 | yfbN | 2385732 | 2386448 | - | 716  | 28  | 0   | 0   | 0   | 0   | 0%   | 0%   | 0%   | 0%   | A | A | A | A | U |
| b2276 | nuoN | 2388070 | 2389527 | - | 1457 | 58  | 58  | 58  | 58  | 58  | 100% | 100% | 100% | 100% | P | P | P | P |   |
| b2277 | nuoM | 2389534 | 2391063 | - | 1529 | 61  | 61  | 61  | 61  | 61  | 100% | 100% | 100% | 100% | P | P | P | P |   |
| b2278 | nuoL | 2391227 | 2393068 | - | 1841 | 74  | 74  | 74  | 74  | 74  | 100% | 100% | 100% | 100% | P | P | P | P |   |
| b2279 | nuoK | 2393065 | 2393367 | - | 302  | 12  | 12  | 12  | 12  | 12  | 100% | 100% | 100% | 100% | P | P | P | P |   |
| b2280 | nuoJ | 2393364 | 2393918 | - | 554  | 22  | 22  | 22  | 22  | 22  | 100% | 100% | 100% | 100% | P | P | P | P |   |
| b2281 | nuoI | 2393930 | 2394472 | - | 542  | 22  | 22  | 22  | 22  | 22  | 100% | 100% | 100% | 100% | P | P | P | P |   |
| b2282 | nuoH | 2394487 | 2395464 | - | 977  | 39  | 39  | 39  | 39  | 39  | 100% | 100% | 100% | 100% | P | P | P | P |   |
| b2283 | nuoG | 2395461 | 2398187 | - | 2726 | 109 | 109 | 109 | 109 | 109 | 100% | 100% | 100% | 100% | P | P | P | P |   |
| b2284 | nuoF | 2398240 | 2399577 | - | 1337 | 53  | 53  | 53  | 53  | 53  | 100% | 100% | 100% | 100% | P | P | P | P |   |
| b2285 | nuoE | 2399574 | 2400074 | - | 500  | 20  | 20  | 20  | 20  | 20  | 100% | 100% | 100% | 100% | P | P | P | P |   |
| b2286 | nuoC | 2400077 | 2401867 | - | 1790 | 72  | 72  | 72  | 72  | 72  | 100% | 100% | 100% | 100% | P | P | P | P |   |
| b2287 | nuoB | 2401973 | 2402635 | - | 662  | 27  | 27  | 27  | 27  | 27  | 100% | 100% | 100% | 100% | P | P | P | P |   |
| b2288 | nuoA | 2402651 | 2403094 | - | 443  | 18  | 18  | 18  | 18  | 18  | 100% | 100% | 100% | 100% | P | P | P | P |   |
| b2289 | lrhA | 2403725 | 2404663 | - | 938  | 37  | 36  | 36  | 36  | 36  | 97%  | 97%  | 97%  | 97%  | P | P | P | P |   |
| b2292 | yfbS | 2407542 | 2409374 | - | 1832 | 74  | 12  | 14  | 16  | 37  | 16%  | 19%  | 22%  | 50%  | P | P | P | P | U |
| b2293 | yfbT | 2409461 | 2410111 | - | 650  | 26  | 26  | 26  | 26  | 26  | 100% | 100% | 100% | 100% | P | P | P | P | U |
| b2294 | yfbU | 2410122 | 2410616 | - | 494  | 20  | 20  | 20  | 20  | 20  | 100% | 100% | 100% | 100% | P | P | P | P | U |
| b2295 | yfbV | 2410699 | 2411154 | - | 455  | 18  | 18  | 18  | 18  | 18  | 100% | 100% | 100% | 100% | P | P | P | P | U |
| b2299 | yfcD | 2416656 | 2417198 | - | 542  | 22  | 22  | 22  | 22  | 22  | 100% | 100% | 100% | 100% | P | P | P | P | U |
| b2300 | yfcE | 2417256 | 2417810 | - | 554  | 22  | 22  | 22  | 22  | 22  | 100% | 100% | 100% | 100% | P | P | P | P | U |
| b2301 | yfcF | 2417863 | 2418507 | - | 644  | 26  | 21  | 21  | 21  | 21  | 81%  | 81%  | 81%  | 81%  | P | P | P | P | U |
| b2305 | yfcI | 2420671 | 2421561 | - | 890  | 36  | 8   | 15  | 18  | 21  | 22%  | 42%  | 50%  | 58%  | P | P | P | P | U |
| b2306 | hisP | 2421758 | 2422531 | - | 773  | 31  | 29  | 29  | 29  | 30  | 94%  | 94%  | 94%  | 97%  | P | P | P | P |   |
| b2307 | hisM | 2422539 | 2423255 | - | 716  | 29  | 29  | 29  | 29  | 29  | 100% | 100% | 100% | 100% | P | P | P | P |   |

|       |      |         |         |   |      |     |    |    |    |    |      |      |      |      |   |   |   |   |   |
|-------|------|---------|---------|---|------|-----|----|----|----|----|------|------|------|------|---|---|---|---|---|
| b2308 | hisQ | 2423252 | 2423938 | - | 686  | 27  | 27 | 27 | 27 | 27 | 100% | 100% | 100% | 100% | P | P | P | P |   |
| b2309 | hisJ | 2424028 | 2424810 | - | 782  | 31  | 31 | 31 | 31 | 31 | 100% | 100% | 100% | 100% | P | P | P | P |   |
| b2310 | argT | 2425031 | 2425813 | - | 782  | 31  | 31 | 31 | 31 | 31 | 100% | 100% | 100% | 100% | P | P | P | P |   |
| b2311 | ubiX | 2426079 | 2426648 | - | 569  | 23  | 19 | 19 | 19 | 19 | 83%  | 83%  | 83%  | 83%  | P | P | P | P |   |
| b2312 | purF | 2426743 | 2428260 | - | 1517 | 61  | 61 | 61 | 61 | 61 | 100% | 100% | 100% | 100% | P | P | P | P |   |
| b2313 | cvpA | 2428297 | 2428785 | - | 488  | 20  | 20 | 20 | 20 | 20 | 100% | 100% | 100% | 100% | P | P | P | P |   |
| b2314 | dedD | 2429044 | 2429706 | - | 662  | 27  | 27 | 27 | 27 | 27 | 100% | 100% | 100% | 100% | P | P | P | P | U |
| b2315 | folC | 2429696 | 2430964 | - | 1268 | 51  | 51 | 51 | 51 | 51 | 100% | 100% | 100% | 100% | P | P | P | P |   |
| b2316 | accD | 2431034 | 2431948 | - | 914  | 37  | 37 | 37 | 37 | 37 | 100% | 100% | 100% | 100% | P | P | P | P |   |
| b2317 | dedA | 2432104 | 2432763 | - | 659  | 26  | 26 | 26 | 26 | 26 | 100% | 100% | 100% | 100% | P | P | P | P | U |
| b2318 | truA | 2432846 | 2433658 | - | 812  | 33  | 33 | 33 | 33 | 33 | 100% | 100% | 100% | 100% | P | P | P | P |   |
| b2319 | usg  | 2433658 | 2434671 | - | 1013 | 40  | 40 | 40 | 40 | 40 | 100% | 100% | 100% | 100% | P | P | P | P | U |
| b2320 | pdxB | 2434737 | 2435873 | - | 1136 | 46  | 46 | 46 | 46 | 46 | 100% | 100% | 100% | 100% | P | P | P | P |   |
| b2322 | yfcJ | 2436964 | 2438142 | - | 1178 | 47  | 0  | 1  | 1  | 1  | 0%   | 2%   | 2%   | 2%   | A | P | P | P | U |
| b2323 | fabB | 2438407 | 2439627 | - | 1220 | 49  | 49 | 49 | 49 | 49 | 100% | 100% | 100% | 100% | P | P | P | P |   |
| b2325 | yfcL | 2441913 | 2442191 | - | 278  | 11  | 11 | 11 | 11 | 11 | 100% | 100% | 100% | 100% | P | P | P | P | U |
| b2326 | yfcM | 2442225 | 2442773 | - | 548  | 22  | 22 | 22 | 22 | 22 | 100% | 100% | 100% | 100% | P | P | P | P | U |
| b2327 | yfcA | 2442773 | 2443582 | - | 809  | 32  | 32 | 32 | 32 | 32 | 100% | 100% | 100% | 100% | P | P | P | P | U |
| b2328 | mepA | 2443582 | 2444406 | - | 824  | 33  | 33 | 33 | 33 | 33 | 100% | 100% | 100% | 100% | P | P | P | P |   |
| b2329 | aroC | 2444410 | 2445495 | - | 1085 | 43  | 43 | 43 | 43 | 43 | 100% | 100% | 100% | 100% | P | P | P | P |   |
| b2330 | prmB | 2445530 | 2446462 | - | 932  | 37  | 37 | 37 | 37 | 37 | 100% | 100% | 100% | 100% | P | P | P | P |   |
| b2332 | yfcO | 2447250 | 2448071 | - | 821  | 32  | 15 | 20 | 30 | 30 | 47%  | 63%  | 94%  | 94%  | P | P | P | P | U |
| b2333 | yfcP | 2448073 | 2448612 | - | 539  | 22  | 0  | 2  | 2  | 2  | 0%   | 9%   | 9%   | 9%   | A | P | P | P | U |
| b2334 | yfcQ | 2448609 | 2449097 | - | 488  | 19  | 0  | 0  | 0  | 0  | 0%   | 0%   | 0%   | 0%   | A | A | A | A | U |
| b2335 | yfcR | 2449094 | 2449606 | - | 512  | 21  | 0  | 0  | 0  | 0  | 0%   | 0%   | 0%   | 0%   | A | A | A | A | U |
| b2336 | yfcS | 2449606 | 2450358 | - | 752  | 30  | 0  | 0  | 0  | 0  | 0%   | 0%   | 0%   | 0%   | A | A | A | A | U |
| b4661 | yfcU | 2450378 | 2453023 | - | 2645 | 106 | 8  | 13 | 14 | 14 | 8%   | 12%  | 13%  | 13%  | P | P | P | P | U |
| b2339 | yfcV | 2453105 | 2453668 | - | 563  | 22  | 0  | 0  | 0  | 0  | 0%   | 0%   | 0%   | 0%   | A | A | A | A | U |
| b2340 | sixA | 2454349 | 2454834 | - | 485  | 19  | 19 | 19 | 19 | 19 | 100% | 100% | 100% | 100% | P | P | P | P |   |
| b2341 | fadJ | 2455037 | 2457181 | - | 2144 | 86  | 67 | 67 | 81 | 81 | 78%  | 78%  | 94%  | 94%  | P | P | P | P |   |
| b2342 | fadI | 2457181 | 2458491 | - | 1310 | 52  | 20 | 20 | 49 | 49 | 38%  | 38%  | 94%  | 94%  | P | P | P | P |   |
| b2343 | yfcZ | 2458672 | 2458956 | - | 284  | 12  | 11 | 12 | 12 | 12 | 92%  | 100% | 100% | 100% | P | P | P | P | U |
| b2346 | vacJ | 2462274 | 2463029 | - | 755  | 31  | 29 | 29 | 29 | 29 | 94%  | 94%  | 94%  | 94%  | P | P | P | P | U |
| b2354 | yfdK | 2469099 | 2469539 | - | 440  | 18  | 0  | 3  | 3  | 3  | 0%   | 17%  | 17%  | 17%  | A | P | P | P | U |
| b2355 | yfdL | 2469566 | 2470144 | - | 578  | 23  | 0  | 0  | 0  | 0  | 0%   | 0%   | 0%   | 0%   | A | A | A | A | U |
| b2356 | yfdM | 2470140 | 2470409 | - | 269  | 11  | 0  | 0  | 0  | 0  | 0%   | 0%   | 0%   | 0%   | A | A | A | A | U |
| b2357 | yfdN | 2470409 | 2470903 | - | 494  | 20  | 0  | 1  | 1  | 1  | 0%   | 5%   | 5%   | 5%   | A | P | P | P | U |
| b2358 | yfdO | 2470900 | 2471346 | - | 446  | 18  | 0  | 0  | 0  | 0  | 0%   | 0%   | 0%   | 0%   | A | A | A | A | U |
| b2364 | dsdC | 2474716 | 2475651 | - | 935  | 37  | 12 | 12 | 14 | 14 | 32%  | 32%  | 38%  | 38%  | P | P | P | P |   |
| b2367 | emrY | 2478660 | 2480198 | - | 1538 | 61  | 0  | 0  | 0  | 0  | 0%   | 0%   | 0%   | 0%   | A | A | A | A | U |
| b2368 | emrK | 2480198 | 2481361 | - | 1163 | 47  | 0  | 0  | 10 | 10 | 0%   | 0%   | 21%  | 21%  | A | A | P | P |   |
| b2371 | yfdE | 2486045 | 2487190 | - | 1145 | 46  | 0  | 1  | 9  | 9  | 0%   | 2%   | 20%  | 20%  | A | P | P | P | U |
| b2372 | yfdV | 2487264 | 2488208 | - | 944  | 38  | 0  | 0  | 0  | 0  | 0%   | 0%   | 0%   | 0%   | A | A | A | A | U |
| b2373 | oxc  | 2488278 | 2489972 | - | 1694 | 68  | 0  | 10 | 10 | 10 | 0%   | 15%  | 15%  | 15%  | A | P | P | P | U |
| b2374 | frc  | 2490026 | 2491276 | - | 1250 | 50  | 0  | 3  | 3  | 3  | 0%   | 6%   | 6%   | 6%   | A | P | P | P |   |
| b2375 | yfdX | 2491789 | 2492424 | - | 635  | 25  | 0  | 0  | 0  | 0  | 0%   | 0%   | 0%   | 0%   | A | A | A | A | U |

|         |        |         |         |   |      |     |    |    |    |    |      |      |      |      |   |   |   |   |   |
|---------|--------|---------|---------|---|------|-----|----|----|----|----|------|------|------|------|---|---|---|---|---|
| b2377   | yfdY   | 2493072 | 2493314 | - | 242  | 10  | 10 | 10 | 10 | 10 | 100% | 100% | 100% | 100% | P | P | P | P | U |
| G0-8906 | tpke70 | 2494216 | 2494651 | - | 435  | 17  | 0  | 0  | 0  | 0  | 0%   | 0%   | 0%   | 0%   | A | A | A | A |   |
| b2379   | yfdZ   | 2495079 | 2496317 | - | 1238 | 50  | 48 | 48 | 48 | 48 | 96%  | 96%  | 96%  | 96%  | P | P | P | P |   |
| b2383   | fryA   | 2500012 | 2502507 | - | 2495 | 100 | 0  | 0  | 0  | 0  | 0%   | 0%   | 0%   | 0%   | A | A | A | A | U |
| b2384   | ypdE   | 2502532 | 2503569 | - | 1037 | 41  | 0  | 0  | 0  | 0  | 0%   | 0%   | 0%   | 0%   | A | A | A | A | U |
| b2385   | ypdF   | 2503569 | 2504654 | - | 1085 | 44  | 0  | 0  | 0  | 0  | 0%   | 0%   | 0%   | 0%   | A | A | A | A | U |
| b2386   | fryC   | 2504669 | 2505916 | - | 1247 | 50  | 0  | 0  | 0  | 0  | 0%   | 0%   | 0%   | 0%   | A | A | A | A | U |
| b2387   | fryB   | 2505938 | 2506264 | - | 326  | 13  | 0  | 0  | 0  | 0  | 0%   | 0%   | 0%   | 0%   | A | A | A | A | U |
| b2388   | glk    | 2506483 | 2507448 | - | 965  | 38  | 34 | 34 | 34 | 34 | 89%  | 89%  | 89%  | 89%  | P | P | P | P |   |
| b2392   | mntH   | 2509490 | 2510728 | - | 1238 | 49  | 47 | 47 | 49 | 49 | 96%  | 96%  | 100% | 100% | P | P | P | P |   |
| b2395   | yfeA   | 2513665 | 2515854 | - | 2189 | 88  | 68 | 68 | 69 | 69 | 77%  | 77%  | 78%  | 78%  | P | P | P | P | U |
| b2396   | alaX   | 2516063 | 2516138 | - | 75   | 3   | 3  | 3  | 3  | 3  | 100% | 100% | 100% | 100% | P | P | P | P |   |
| b2397   | alaW   | 2516178 | 2516253 | - | 75   | 3   | 3  | 3  | 3  | 3  | 100% | 100% | 100% | 100% | P | P | P | P |   |
| b2400   | gltX   | 2517279 | 2518694 | - | 1415 | 57  | 55 | 55 | 55 | 55 | 96%  | 96%  | 96%  | 96%  | P | P | P | P |   |
| b2405   | xapR   | 2519615 | 2520499 | - | 884  | 35  | 12 | 15 | 15 | 17 | 34%  | 43%  | 43%  | 49%  | P | P | P | P |   |
| b2406   | xapB   | 2520751 | 2522007 | - | 1256 | 51  | 0  | 0  | 5  | 6  | 0%   | 0%   | 10%  | 12%  | A | A | P | P |   |
| b2407   | xapA   | 2522067 | 2522900 | - | 833  | 33  | 0  | 0  | 1  | 1  | 0%   | 0%   | 3%   | 3%   | A | A | P | P |   |
| b2409   | yfeR   | 2523952 | 2524878 | - | 926  | 37  | 8  | 9  | 9  | 9  | 22%  | 24%  | 24%  | 24%  | P | P | P | P | U |
| b4546   | ypeB   | 2525963 | 2526181 | - | 218  | 9   | 2  | 2  | 2  | 2  | 22%  | 22%  | 22%  | 22%  | P | P | P | P | U |
| b2411   | ligA   | 2526183 | 2528198 | - | 2015 | 80  | 79 | 79 | 79 | 79 | 99%  | 99%  | 99%  | 99%  | P | P | P | P |   |
| b2412   | zipA   | 2528269 | 2529255 | - | 986  | 39  | 39 | 39 | 39 | 39 | 100% | 100% | 100% | 100% | P | P | P | P |   |
| b2418   | pdxK   | 2534408 | 2535259 | - | 851  | 34  | 32 | 32 | 32 | 33 | 94%  | 94%  | 94%  | 97%  | P | P | P | P |   |
| b2421   | cysM   | 2536694 | 2537605 | - | 911  | 36  | 36 | 36 | 36 | 36 | 100% | 100% | 100% | 100% | P | P | P | P |   |
| b2422   | cysA   | 2537739 | 2538836 | - | 1097 | 44  | 44 | 44 | 44 | 44 | 100% | 100% | 100% | 100% | P | P | P | P |   |
| b2423   | cysW   | 2538826 | 2539701 | - | 875  | 35  | 35 | 35 | 35 | 35 | 100% | 100% | 100% | 100% | P | P | P | P |   |
| b2424   | cysU   | 2539701 | 2540534 | - | 833  | 34  | 34 | 34 | 34 | 34 | 100% | 100% | 100% | 100% | P | P | P | P |   |
| b2425   | cysP   | 2540534 | 2541550 | - | 1016 | 40  | 40 | 40 | 40 | 40 | 100% | 100% | 100% | 100% | P | P | P | P |   |
| b2426   | ucpA   | 2541854 | 2542645 | - | 791  | 32  | 28 | 28 | 31 | 31 | 88%  | 88%  | 97%  | 97%  | P | P | P | P | U |
| b2427   | yfeT   | 2542774 | 2543631 | - | 857  | 34  | 0  | 1  | 1  | 2  | 0%   | 3%   | 3%   | 6%   | A | P | P | P | U |
| b2431   | yfeX   | 2547668 | 2548567 | - | 899  | 36  | 36 | 36 | 36 | 36 | 100% | 100% | 100% | 100% | P | P | P | P | U |
| b2432   | yfeY   | 2548663 | 2549238 | - | 575  | 23  | 23 | 23 | 23 | 23 | 100% | 100% | 100% | 100% | P | P | P | P | U |
| b2433   | yfeZ   | 2549299 | 2549748 | - | 449  | 18  | 18 | 18 | 18 | 18 | 100% | 100% | 100% | 100% | P | P | P | P | U |
| b2434   | ypeA   | 2549735 | 2550160 | - | 425  | 18  | 18 | 18 | 18 | 18 | 100% | 100% | 100% | 100% | P | P | P | P | U |
| b2437   | eutR   | 2552152 | 2553204 | - | 1052 | 42  | 7  | 8  | 9  | 9  | 17%  | 19%  | 21%  | 21%  | P | P | P | P | U |
| b2438   | eutK   | 2553250 | 2553750 | - | 500  | 20  | 9  | 9  | 9  | 9  | 45%  | 45%  | 45%  | 45%  | P | P | P | P | U |
| b2439   | eutL   | 2553763 | 2554422 | - | 659  | 26  | 24 | 24 | 24 | 24 | 92%  | 92%  | 92%  | 92%  | P | P | P | P | U |
| b2440   | eutC   | 2554432 | 2555319 | - | 887  | 36  | 31 | 31 | 31 | 31 | 86%  | 86%  | 86%  | 86%  | P | P | P | P |   |
| b2441   | eutB   | 2555340 | 2556701 | - | 1361 | 54  | 48 | 48 | 48 | 48 | 89%  | 89%  | 89%  | 89%  | P | P | P | P |   |
| b2451   | eutA   | 2563503 | 2564906 | - | 1403 | 56  | 0  | 0  | 1  | 1  | 0%   | 0%   | 2%   | 2%   | A | A | P | P |   |
| b2452   | eutH   | 2564903 | 2566129 | - | 1226 | 49  | 0  | 0  | 6  | 6  | 0%   | 0%   | 12%  | 12%  | A | A | P | P | U |
| b2453   | eutG   | 2566346 | 2567533 | - | 1187 | 47  | 0  | 0  | 3  | 3  | 0%   | 0%   | 6%   | 6%   | A | A | P | P | U |
| b2454   | eutJ   | 2567523 | 2568359 | - | 836  | 33  | 0  | 0  | 1  | 2  | 0%   | 0%   | 3%   | 6%   | A | A | P | P | U |
| b2455   | eutE   | 2568370 | 2569773 | - | 1403 | 56  | 0  | 0  | 2  | 3  | 0%   | 0%   | 4%   | 5%   | A | A | P | P | U |
| b2456   | eutN   | 2569785 | 2570072 | - | 287  | 12  | 0  | 0  | 2  | 2  | 0%   | 0%   | 17%  | 17%  | A | A | P | P | U |
| b2457   | eutM   | 2570179 | 2570472 | - | 293  | 12  | 0  | 0  | 0  | 1  | 0%   | 0%   | 0%   | 8%   | A | A | A | P | U |
| b2458   | eutD   | 2570511 | 2571527 | - | 1016 | 41  | 0  | 0  | 5  | 6  | 0%   | 0%   | 12%  | 15%  | A | A | P | P | U |

|         |       |         |         |   |      |     |     |     |     |     |      |      |      |      |   |   |   |   |   |
|---------|-------|---------|---------|---|------|-----|-----|-----|-----|-----|------|------|------|------|---|---|---|---|---|
| b2459   | eutT  | 2571524 | 2572327 | - | 803  | 32  | 0   | 0   | 1   | 1   | 0%   | 0%   | 3%   | 3%   | A | A | P | P | U |
| b2460   | eutQ  | 2572324 | 2573025 | - | 701  | 28  | 0   | 0   | 1   | 1   | 0%   | 0%   | 4%   | 4%   | A | A | P | P | U |
| b2461   | eutP  | 2573000 | 2573479 | - | 479  | 19  | 0   | 0   | 0   | 0   | 0%   | 0%   | 0%   | 0%   | A | A | A | A | U |
| b2462   | eutS  | 2573492 | 2573827 | - | 335  | 13  | 0   | 0   | 0   | 0   | 0%   | 0%   | 0%   | 0%   | A | A | A | A | U |
| b2463   | maeB  | 2574120 | 2576399 | - | 2279 | 91  | 91  | 91  | 91  | 91  | 100% | 100% | 100% | 100% | P | P | P | P | U |
| b2466   | ypfG  | 2579756 | 2580799 | - | 1043 | 42  | 1   | 13  | 13  | 13  | 2%   | 31%  | 31%  | 31%  | P | P | P | P | U |
| b2467   | nudK  | 2580925 | 2581500 | - | 575  | 23  | 17  | 17  | 17  | 17  | 74%  | 74%  | 74%  | 74%  | P | P | P | P | U |
| b2468   | aegA  | 2581568 | 2583547 | - | 1979 | 79  | 0   | 4   | 6   | 6   | 0%   | 5%   | 8%   | 8%   | A | P | P | P | U |
| b4606   | ypfM  | 2588829 | 2588888 | - | 59   | 3   | 2   | 2   | 3   | 3   | 67%  | 67%  | 100% | 100% | P | P | P | P | U |
| b2473   | ypfH  | 2591094 | 2591792 | - | 698  | 28  | 21  | 21  | 22  | 23  | 75%  | 75%  | 79%  | 82%  | P | P | P | P | U |
| b2474   | ypfI  | 2591866 | 2593881 | - | 2015 | 80  | 73  | 73  | 73  | 73  | 91%  | 91%  | 91%  | 91%  | P | P | P | P | U |
| b2475   | ypfJ  | 2593896 | 2594759 | - | 863  | 34  | 34  | 34  | 34  | 34  | 100% | 100% | 100% | 100% | P | P | P | P | U |
| b2476   | purC  | 2594927 | 2595640 | - | 713  | 29  | 29  | 29  | 29  | 29  | 100% | 100% | 100% | 100% | P | P | P | P | U |
| b2477   | bamC  | 2595853 | 2596887 | - | 1034 | 41  | 41  | 41  | 41  | 41  | 100% | 100% | 100% | 100% | P | P | P | P | U |
| b2478   | dapA  | 2596904 | 2597782 | - | 878  | 35  | 35  | 35  | 35  | 35  | 100% | 100% | 100% | 100% | P | P | P | P | U |
| b2493   | yfgO  | 2612842 | 2613903 | - | 1061 | 42  | 41  | 41  | 41  | 41  | 98%  | 98%  | 98%  | 98%  | P | P | P | P | U |
| b2496   | hda   | 2616097 | 2616843 | - | 746  | 30  | 30  | 30  | 30  | 30  | 100% | 100% | 100% | 100% | P | P | P | P | U |
| b2497   | uraA  | 2616893 | 2618182 | - | 1289 | 51  | 51  | 51  | 51  | 51  | 100% | 100% | 100% | 100% | P | P | P | P | U |
| b2498   | upp   | 2618268 | 2618894 | - | 626  | 25  | 25  | 25  | 25  | 25  | 100% | 100% | 100% | 100% | P | P | P | P | U |
| b2503   | yfgF  | 2624717 | 2626960 | - | 2243 | 90  | 0   | 0   | 0   | 0   | 0%   | 0%   | 0%   | 0%   | A | A | A | A | U |
| b2507   | guaA  | 2628980 | 2630557 | - | 1577 | 63  | 63  | 63  | 63  | 63  | 100% | 100% | 100% | 100% | P | P | P | P | U |
| b2508   | guaB  | 2630626 | 2632092 | - | 1466 | 59  | 59  | 59  | 59  | 59  | 100% | 100% | 100% | 100% | P | P | P | P | U |
| b2510   | yfgJ  | 2633621 | 2633836 | - | 215  | 9   | 5   | 5   | 5   | 5   | 56%  | 56%  | 56%  | 56%  | P | P | P | P | U |
| b2511   | der   | 2633906 | 2635378 | - | 1472 | 59  | 59  | 59  | 59  | 59  | 100% | 100% | 100% | 100% | P | P | P | P | U |
| b2512   | bamB  | 2635496 | 2636674 | - | 1178 | 47  | 47  | 47  | 47  | 47  | 100% | 100% | 100% | 100% | P | P | P | P | U |
| b2513   | yfgM  | 2636685 | 2637305 | - | 620  | 25  | 25  | 25  | 25  | 25  | 100% | 100% | 100% | 100% | P | P | P | P | U |
| b2514   | hisS  | 2637323 | 2638597 | - | 1274 | 51  | 51  | 51  | 51  | 51  | 100% | 100% | 100% | 100% | P | P | P | P | U |
| G0-9385 | sroE  | 2638617 | 2638708 | - | 91   | 4   | 4   | 4   | 4   | 4   | 100% | 100% | 100% | 100% | P | P | P | P | U |
| b2515   | ispG  | 2638708 | 2639826 | - | 1118 | 44  | 44  | 44  | 44  | 44  | 100% | 100% | 100% | 100% | P | P | P | P | U |
| b2516   | yfgA  | 2639853 | 2640866 | - | 1013 | 41  | 41  | 41  | 41  | 41  | 100% | 100% | 100% | 100% | P | P | P | P | U |
| b2517   | rlmN  | 2641151 | 2642305 | - | 1154 | 47  | 45  | 45  | 45  | 45  | 96%  | 96%  | 96%  | 96%  | P | P | P | P | U |
| b2518   | ndk   | 2642455 | 2642886 | - | 431  | 17  | 17  | 17  | 17  | 17  | 100% | 100% | 100% | 100% | P | P | P | P | U |
| b2519   | pbpC  | 2643035 | 2645347 | - | 2312 | 92  | 17  | 17  | 19  | 19  | 18%  | 18%  | 21%  | 21%  | P | P | P | P | U |
| b2520   | yfhM  | 2645348 | 2650309 | - | 4961 | 199 | 186 | 186 | 189 | 190 | 93%  | 93%  | 95%  | 95%  | P | P | P | P | U |
| G0-8907 | C0614 | 2651474 | 2651560 | - | 86   | 4   | 0   | 0   | 0   | 0   | 0%   | 0%   | 0%   | 0%   | A | A | A | A | U |
| b2522   | sseB  | 2652179 | 2652955 | - | 776  | 31  | 31  | 31  | 31  | 31  | 100% | 100% | 100% | 100% | P | P | P | P | U |
| b2523   | pepB  | 2653097 | 2654380 | - | 1283 | 52  | 52  | 52  | 52  | 52  | 100% | 100% | 100% | 100% | P | P | P | P | U |
| b2524   | iscX  | 2654558 | 2654758 | - | 200  | 8   | 8   | 8   | 8   | 8   | 100% | 100% | 100% | 100% | P | P | P | P | U |
| b2525   | fdx   | 2654770 | 2655105 | - | 335  | 14  | 14  | 14  | 14  | 14  | 100% | 100% | 100% | 100% | P | P | P | P | U |
| b2526   | hscA  | 2655107 | 2656957 | - | 1850 | 74  | 73  | 73  | 73  | 73  | 99%  | 99%  | 99%  | 99%  | P | P | P | P | U |
| b2527   | hscB  | 2656974 | 2657489 | - | 515  | 21  | 21  | 21  | 21  | 21  | 100% | 100% | 100% | 100% | P | P | P | P | U |
| b2528   | iscA  | 2657585 | 2657908 | - | 323  | 13  | 13  | 13  | 13  | 13  | 100% | 100% | 100% | 100% | P | P | P | P | U |
| b2529   | iscU  | 2657925 | 2658311 | - | 386  | 16  | 16  | 16  | 16  | 16  | 100% | 100% | 100% | 100% | P | P | P | P | U |
| b2530   | iscS  | 2658339 | 2659553 | - | 1214 | 49  | 49  | 49  | 49  | 49  | 100% | 100% | 100% | 100% | P | P | P | P | U |
| b2531   | iscR  | 2659665 | 2660153 | - | 488  | 20  | 20  | 20  | 20  | 20  | 100% | 100% | 100% | 100% | P | P | P | P | U |
| b2532   | trmJ  | 2660605 | 2661345 | - | 740  | 29  | 29  | 29  | 29  | 29  | 100% | 100% | 100% | 100% | P | P | P | P | U |

|       |      |         |         |   |      |     |     |     |     |     |      |      |      |      |   |   |   |   |   |
|-------|------|---------|---------|---|------|-----|-----|-----|-----|-----|------|------|------|------|---|---|---|---|---|
| b2536 | hcaT | 2664729 | 2665868 | - | 1139 | 45  | 16  | 16  | 16  | 16  | 36%  | 36%  | 36%  | 36%  | P | P | P | P | U |
| b2537 | hcaR | 2666028 | 2666918 | - | 890  | 35  | 29  | 29  | 29  | 29  | 83%  | 83%  | 83%  | 83%  | P | P | P | P |   |
| b2544 | yphB | 2671838 | 2672710 | - | 872  | 35  | 4   | 6   | 6   | 6   | 11%  | 17%  | 17%  | 17%  | P | P | P | P | U |
| b2545 | yphC | 2672722 | 2673783 | - | 1061 | 43  | 6   | 15  | 17  | 17  | 14%  | 35%  | 40%  | 40%  | P | P | P | P | U |
| b2546 | yphD | 2673849 | 2674847 | - | 998  | 40  | 2   | 10  | 10  | 10  | 5%   | 25%  | 25%  | 25%  | P | P | P | P | U |
| b2547 | yphE | 2674872 | 2676383 | - | 1511 | 61  | 0   | 9   | 9   | 9   | 0%   | 15%  | 15%  | 15%  | A | P | P | P | U |
| b2548 | yphF | 2676406 | 2677389 | - | 983  | 39  | 0   | 5   | 6   | 6   | 0%   | 13%  | 15%  | 15%  | A | P | P | P | U |
| b2549 | yphG | 2677486 | 2680767 | - | 3281 | 131 | 0   | 2   | 8   | 9   | 0%   | 2%   | 6%   | 7%   | A | P | P | P | U |
| b2551 | glyA | 2682276 | 2683529 | - | 1253 | 51  | 51  | 51  | 51  | 51  | 100% | 100% | 100% | 100% | P | P | P | P |   |
| b2553 | glnB | 2685092 | 2685430 | - | 338  | 14  | 14  | 14  | 14  | 14  | 100% | 100% | 100% | 100% | P | P | P | P |   |
| b2554 | yfhA | 2685491 | 2686825 | - | 1334 | 53  | 49  | 49  | 49  | 49  | 92%  | 92%  | 92%  | 92%  | P | P | P | P | U |
| b2555 | yfhG | 2686815 | 2687528 | - | 713  | 29  | 28  | 28  | 28  | 28  | 97%  | 97%  | 97%  | 97%  | P | P | P | P | U |
| b2556 | yfhK | 2687693 | 2689120 | - | 1427 | 57  | 29  | 30  | 31  | 31  | 51%  | 53%  | 54%  | 54%  | P | P | P | P | U |
| b4441 | glmY | 2689179 | 2689362 | - | 183  | 7   | 6   | 6   | 6   | 6   | 86%  | 86%  | 86%  | 86%  | P | P | P | P |   |
| b2557 | purL | 2689678 | 2693565 | - | 3887 | 155 | 155 | 155 | 155 | 155 | 100% | 100% | 100% | 100% | P | P | P | P |   |
| b2559 | tadA | 2695376 | 2695879 | - | 503  | 21  | 20  | 20  | 20  | 20  | 95%  | 95%  | 95%  | 95%  | P | P | P | P |   |
| b2560 | yfhB | 2695937 | 2696572 | - | 635  | 25  | 24  | 24  | 24  | 25  | 96%  | 96%  | 96%  | 100% | P | P | P | P | U |
| b4607 | ryfB | 2698081 | 2698399 | - | 318  | 12  | 7   | 7   | 7   | 7   | 58%  | 58%  | 58%  | 58%  | P | P | P | P | U |
| b2563 | acpS | 2698640 | 2699020 | - | 380  | 15  | 13  | 13  | 13  | 13  | 87%  | 87%  | 87%  | 87%  | P | P | P | P |   |
| b2564 | pdxJ | 2699020 | 2699751 | - | 731  | 29  | 29  | 29  | 29  | 29  | 100% | 100% | 100% | 100% | P | P | P | P |   |
| b2565 | recO | 2699763 | 2700491 | - | 728  | 30  | 29  | 29  | 29  | 29  | 97%  | 97%  | 97%  | 97%  | P | P | P | P |   |
| b2566 | era  | 2700503 | 2701408 | - | 905  | 36  | 36  | 36  | 36  | 36  | 100% | 100% | 100% | 100% | P | P | P | P |   |
| b2567 | rnc  | 2701405 | 2702085 | - | 680  | 27  | 27  | 27  | 27  | 27  | 100% | 100% | 100% | 100% | P | P | P | P |   |
| b2568 | lepB | 2702357 | 2703331 | - | 974  | 39  | 39  | 39  | 39  | 39  | 100% | 100% | 100% | 100% | P | P | P | P |   |
| b2569 | lepA | 2703347 | 2705146 | - | 1799 | 72  | 72  | 72  | 72  | 72  | 100% | 100% | 100% | 100% | P | P | P | P |   |
| b2570 | rseC | 2705344 | 2705823 | - | 479  | 19  | 18  | 18  | 18  | 18  | 95%  | 95%  | 95%  | 95%  | P | P | P | P |   |
| b2571 | rseB | 2705820 | 2706776 | - | 956  | 38  | 38  | 38  | 38  | 38  | 100% | 100% | 100% | 100% | P | P | P | P |   |
| b2572 | rseA | 2706776 | 2707426 | - | 650  | 26  | 26  | 26  | 26  | 26  | 100% | 100% | 100% | 100% | P | P | P | P |   |
| b2573 | rpoE | 2707459 | 2708034 | - | 575  | 23  | 23  | 23  | 23  | 23  | 100% | 100% | 100% | 100% | P | P | P | P |   |
| b2575 | yfiC | 2710049 | 2710786 | - | 737  | 29  | 23  | 23  | 23  | 23  | 79%  | 79%  | 79%  | 79%  | P | P | P | P | U |
| b2577 | yfiE | 2712461 | 2713342 | - | 881  | 36  | 9   | 24  | 24  | 24  | 25%  | 67%  | 67%  | 67%  | P | P | P | P | U |
| b2579 | yfiD | 2714088 | 2714471 | - | 383  | 16  | 16  | 16  | 16  | 16  | 100% | 100% | 100% | 100% | P | P | P | P |   |
| b2581 | yfiF | 2715513 | 2716550 | - | 1037 | 42  | 39  | 39  | 39  | 39  | 93%  | 93%  | 93%  | 93%  | P | P | P | P | U |
| b2587 | kgtP | 2722470 | 2723768 | - | 1298 | 52  | 52  | 52  | 52  | 52  | 100% | 100% | 100% | 100% | P | P | P | P |   |
| b2588 | rrfG | 2724091 | 2724210 | - | 119  | 4   | 4   | 4   | 4   | 4   | 100% | 100% | 100% | 100% | P | P | P | P |   |
| b2589 | rrlG | 2724303 | 2727206 | - | 2903 | 116 | 116 | 116 | 116 | 116 | 100% | 100% | 100% | 100% | P | P | P | P |   |
| b2590 | gltW | 2727391 | 2727466 | - | 75   | 3   | 3   | 3   | 3   | 3   | 100% | 100% | 100% | 100% | P | P | P | P |   |
| b2591 | rrsG | 2727638 | 2729179 | - | 1541 | 62  | 62  | 62  | 62  | 62  | 100% | 100% | 100% | 100% | P | P | P | P |   |
| b2592 | clpB | 2729622 | 2732195 | - | 2573 | 103 | 103 | 103 | 103 | 103 | 100% | 100% | 100% | 100% | P | P | P | P |   |
| b4609 | ryfD | 2732175 | 2732317 | - | 142  | 5   | 5   | 5   | 5   | 5   | 100% | 100% | 100% | 100% | P | P | P | P | U |
| b2593 | yfiH | 2732325 | 2733056 | - | 731  | 29  | 29  | 29  | 29  | 29  | 100% | 100% | 100% | 100% | P | P | P | P | U |
| b2594 | rluD | 2733053 | 2734033 | - | 980  | 39  | 39  | 39  | 39  | 39  | 100% | 100% | 100% | 100% | P | P | P | P |   |
| b2600 | tyrA | 2736970 | 2738091 | - | 1121 | 44  | 44  | 44  | 44  | 44  | 100% | 100% | 100% | 100% | P | P | P | P |   |
| b2601 | aroF | 2738102 | 2739172 | - | 1070 | 43  | 43  | 43  | 43  | 43  | 100% | 100% | 100% | 100% | P | P | P | P |   |
| b2606 | rplS | 2742205 | 2742552 | - | 347  | 14  | 14  | 14  | 14  | 14  | 100% | 100% | 100% | 100% | P | P | P | P |   |
| b2607 | trmD | 2742594 | 2743361 | - | 767  | 31  | 31  | 31  | 31  | 31  | 100% | 100% | 100% | 100% | P | P | P | P |   |

|       |      |         |         |   |      |     |     |     |     |     |      |      |      |      |   |   |   |   |   |
|-------|------|---------|---------|---|------|-----|-----|-----|-----|-----|------|------|------|------|---|---|---|---|---|
| b2608 | rimM | 2743392 | 2743940 | - | 548  | 22  | 22  | 22  | 22  | 22  | 100% | 100% | 100% | 100% | P | P | P | P |   |
| b2609 | rpsP | 2743959 | 2744207 | - | 248  | 10  | 10  | 10  | 10  | 10  | 100% | 100% | 100% | 100% | P | P | P | P |   |
| b2610 | ffh  | 2744456 | 2745817 | - | 1361 | 54  | 54  | 54  | 54  | 54  | 100% | 100% | 100% | 100% | P | P | P | P |   |
| b2614 | grpE | 2748137 | 2748730 | - | 593  | 24  | 23  | 24  | 24  | 24  | 96%  | 100% | 100% | 100% | P | P | P | P |   |
| b2618 | yfjF | 2752030 | 2752320 | - | 290  | 12  | 12  | 12  | 12  | 12  | 100% | 100% | 100% | 100% | P | P | P | P | U |
| b2619 | yfjG | 2752310 | 2752786 | - | 476  | 19  | 18  | 18  | 18  | 18  | 95%  | 95%  | 95%  | 95%  | P | P | P | P | U |
| b2623 | yfjH | 2755666 | 2756622 | - | 956  | 38  | 0   | 0   | 0   | 0   | 0%   | 0%   | 0%   | 0%   | A | A | A | A | U |
| b2627 | yfjK | 2759373 | 2761562 | - | 2189 | 88  | 66  | 66  | 67  | 70  | 75%  | 75%  | 76%  | 80%  | P | P | P | P | U |
| b2628 | yfjL | 2761559 | 2763175 | - | 1616 | 65  | 62  | 62  | 62  | 64  | 95%  | 95%  | 95%  | 98%  | P | P | P | P | U |
| b2629 | yfjM | 2763535 | 2763798 | - | 263  | 11  | 0   | 1   | 1   | 1   | 0%   | 9%   | 9%   | 9%   | A | P | P | P | U |
| b2638 | yfjU | 2770024 | 2770176 | - | 152  | 6   | 1   | 1   | 1   | 1   | 17%  | 17%  | 17%  | 17%  | P | P | P | P | U |
| b2641 | yfjV | 2770189 | 2771204 | - | 1015 | 41  | 14  | 15  | 15  | 16  | 34%  | 37%  | 37%  | 39%  | P | P | P | P | U |
| b2647 | ypjA | 2776168 | 2780748 | - | 4580 | 184 | 54  | 82  | 95  | 95  | 29%  | 45%  | 52%  | 52%  | P | P | P | P |   |
| b2648 | pinH | 2781087 | 2781326 | - | 239  | 10  | 0   | 1   | 1   | 1   | 0%   | 10%  | 10%  | 10%  | A | P | P | P | U |
| b2650 | ypjC | 2781660 | 2783033 | - | 1373 | 55  | 2   | 2   | 2   | 2   | 4%   | 4%   | 4%   | 4%   | P | P | P | P | U |
| b2652 | ileY | 2783784 | 2783859 | - | 75   | 3   | 2   | 2   | 2   | 2   | 67%  | 67%  | 67%  | 67%  | P | P | P | P |   |
| b2665 | ygaU | 2794359 | 2794808 | - | 449  | 18  | 18  | 18  | 18  | 18  | 100% | 100% | 100% | 100% | P | P | P | P | U |
| b2666 | yqaE | 2794892 | 2795050 | - | 158  | 6   | 6   | 6   | 6   | 6   | 100% | 100% | 100% | 100% | P | P | P | P | U |
| b2669 | stpA | 2796113 | 2796517 | - | 404  | 16  | 16  | 16  | 16  | 16  | 100% | 100% | 100% | 100% | P | P | P | P |   |
| b2671 | ygaC | 2797672 | 2798016 | - | 344  | 14  | 6   | 13  | 14  | 14  | 43%  | 93%  | 100% | 100% | P | P | P | P | U |
| b2687 | luxS | 2812240 | 2812755 | - | 515  | 21  | 21  | 21  | 21  | 21  | 100% | 100% | 100% | 100% | P | P | P | P |   |
| b2688 | gshA | 2812905 | 2814461 | - | 1556 | 63  | 63  | 63  | 63  | 63  | 100% | 100% | 100% | 100% | P | P | P | P |   |
| b2689 | yqaA | 2814534 | 2814962 | - | 428  | 17  | 16  | 16  | 16  | 17  | 94%  | 94%  | 94%  | 100% | P | P | P | P | U |
| b2690 | yqaB | 2814959 | 2815525 | - | 566  | 22  | 22  | 22  | 22  | 22  | 100% | 100% | 100% | 100% | P | P | P | P | U |
| b2691 | argQ | 2815806 | 2815882 | - | 76   | 4   | 4   | 4   | 4   | 4   | 100% | 100% | 100% | 100% | P | P | P | P |   |
| b2692 | argZ | 2816081 | 2816157 | - | 76   | 4   | 4   | 4   | 4   | 4   | 100% | 100% | 100% | 100% | P | P | P | P |   |
| b2693 | argY | 2816220 | 2816296 | - | 76   | 3   | 3   | 3   | 3   | 3   | 100% | 100% | 100% | 100% | P | P | P | P |   |
| b2694 | argV | 2816495 | 2816571 | - | 76   | 3   | 3   | 3   | 3   | 3   | 100% | 100% | 100% | 100% | P | P | P | P |   |
| b2695 | serV | 2816575 | 2816667 | - | 92   | 4   | 4   | 4   | 4   | 4   | 100% | 100% | 100% | 100% | P | P | P | P |   |
| b2696 | csrA | 2816983 | 2817168 | - | 185  | 7   | 7   | 7   | 7   | 7   | 100% | 100% | 100% | 100% | P | P | P | P |   |
| b2697 | alaS | 2817403 | 2820033 | - | 2630 | 106 | 106 | 106 | 106 | 106 | 100% | 100% | 100% | 100% | P | P | P | P |   |
| b2698 | recX | 2820161 | 2820661 | - | 500  | 20  | 0   | 0   | 0   | 0   | 0%   | 0%   | 0%   | 0%   | A | A | A | A |   |
| b2699 | recA | 2820730 | 2821791 | - | 1061 | 43  | 41  | 41  | 41  | 41  | 95%  | 95%  | 95%  | 95%  | P | P | P | P |   |
| b2700 | ygaD | 2821871 | 2822368 | - | 497  | 20  | 20  | 20  | 20  | 20  | 100% | 100% | 100% | 100% | P | P | P | P | U |
| b2701 | mltB | 2822513 | 2823598 | - | 1085 | 43  | 43  | 43  | 43  | 43  | 100% | 100% | 100% | 100% | P | P | P | P |   |
| b2709 | norR | 2828797 | 2830311 | - | 1514 | 61  | 32  | 52  | 52  | 52  | 52%  | 85%  | 85%  | 85%  | P | P | P | P |   |
| b2712 | hypF | 2833195 | 2835447 | - | 2252 | 90  | 11  | 13  | 14  | 16  | 12%  | 14%  | 16%  | 18%  | P | P | P | P |   |
| b2713 | hydN | 2835600 | 2836127 | - | 527  | 21  | 0   | 0   | 1   | 1   | 0%   | 0%   | 5%   | 5%   | A | A | P | P |   |
| b2714 | ascG | 2836276 | 2837289 | - | 1013 | 41  | 39  | 39  | 39  | 39  | 95%  | 95%  | 95%  | 95%  | P | P | P | P |   |
| b2717 | hycI | 2840595 | 2841065 | - | 470  | 19  | 12  | 13  | 17  | 18  | 63%  | 68%  | 89%  | 95%  | P | P | P | P |   |
| b2718 | hycH | 2841058 | 2841468 | - | 410  | 16  | 4   | 4   | 6   | 6   | 25%  | 25%  | 38%  | 38%  | P | P | P | P |   |
| b2719 | hycG | 2841465 | 2842232 | - | 767  | 31  | 5   | 6   | 6   | 6   | 16%  | 19%  | 19%  | 19%  | P | P | P | P |   |
| b2720 | hycF | 2842232 | 2842774 | - | 542  | 21  | 0   | 0   | 0   | 0   | 0%   | 0%   | 0%   | 0%   | A | A | A | A |   |
| b2721 | hycE | 2842784 | 2844493 | - | 1709 | 68  | 0   | 0   | 5   | 5   | 0%   | 0%   | 7%   | 7%   | A | A | P | P |   |
| b2722 | hycD | 2844511 | 2845434 | - | 923  | 37  | 0   | 0   | 0   | 0   | 0%   | 0%   | 0%   | 0%   | A | A | A | A |   |
| b2723 | hycC | 2845437 | 2847263 | - | 1826 | 73  | 0   | 0   | 3   | 3   | 0%   | 0%   | 4%   | 4%   | A | A | P | P |   |

|       |      |         |         |   |      |     |    |    |    |    |      |      |      |      |   |   |   |   |   |
|-------|------|---------|---------|---|------|-----|----|----|----|----|------|------|------|------|---|---|---|---|---|
| b2724 | hycB | 2847260 | 2847871 | - | 611  | 24  | 0  | 0  | 3  | 3  | 0%   | 0%   | 13%  | 13%  | A | A | P | P |   |
| b2725 | hycA | 2847996 | 2848457 | - | 461  | 19  | 0  | 0  | 1  | 1  | 0%   | 0%   | 5%   | 5%   | A | A | P | P |   |
| b2732 | ygbA | 2854475 | 2854828 | - | 353  | 14  | 0  | 0  | 12 | 12 | 0%   | 0%   | 86%  | 86%  | A | A | P | P | U |
| b2735 | ygbI | 2858489 | 2859286 | - | 797  | 32  | 25 | 25 | 25 | 25 | 78%  | 78%  | 78%  | 78%  | P | P | P | P | U |
| b2741 | rpoS | 2864581 | 2865573 | - | 992  | 40  | 40 | 40 | 40 | 40 | 100% | 100% | 100% | 100% | P | P | P | P |   |
| b2742 | nlpD | 2865636 | 2866775 | - | 1139 | 45  | 45 | 45 | 45 | 45 | 100% | 100% | 100% | 100% | P | P | P | P | U |
| b2743 | pcm  | 2866915 | 2867541 | - | 626  | 25  | 25 | 25 | 25 | 25 | 100% | 100% | 100% | 100% | P | P | P | P |   |
| b2744 | surE | 2867535 | 2868296 | - | 761  | 30  | 30 | 30 | 30 | 30 | 100% | 100% | 100% | 100% | P | P | P | P |   |
| b2745 | truD | 2868277 | 2869326 | - | 1049 | 42  | 42 | 42 | 42 | 42 | 100% | 100% | 100% | 100% | P | P | P | P |   |
| b2746 | ispF | 2869323 | 2869802 | - | 479  | 19  | 19 | 19 | 19 | 19 | 100% | 100% | 100% | 100% | P | P | P | P |   |
| b2747 | ispD | 2869802 | 2870512 | - | 710  | 29  | 29 | 29 | 29 | 29 | 100% | 100% | 100% | 100% | P | P | P | P |   |
| b2748 | ftsB | 2870531 | 2870842 | - | 311  | 13  | 13 | 13 | 13 | 13 | 100% | 100% | 100% | 100% | P | P | P | P |   |
| b2749 | ygbE | 2871036 | 2871359 | - | 323  | 13  | 13 | 13 | 13 | 13 | 100% | 100% | 100% | 100% | P | P | P | P | U |
| b2750 | cysC | 2871409 | 2872014 | - | 605  | 24  | 24 | 24 | 24 | 24 | 100% | 100% | 100% | 100% | P | P | P | P |   |
| b2751 | cysN | 2872014 | 2873441 | - | 1427 | 57  | 57 | 57 | 57 | 57 | 100% | 100% | 100% | 100% | P | P | P | P |   |
| b2752 | cysD | 2873443 | 2874351 | - | 908  | 36  | 36 | 36 | 36 | 36 | 100% | 100% | 100% | 100% | P | P | P | P |   |
| b2754 | ygbF | 2876591 | 2876875 | - | 284  | 11  | 6  | 8  | 8  | 8  | 55%  | 73%  | 73%  | 73%  | P | P | P | P | U |
| b2755 | ygbT | 2876877 | 2877794 | - | 917  | 37  | 14 | 20 | 20 | 22 | 38%  | 54%  | 54%  | 59%  | P | P | P | P | U |
| b2756 | ygcH | 2877810 | 2878409 | - | 599  | 24  | 9  | 14 | 14 | 16 | 38%  | 58%  | 58%  | 67%  | P | P | P | P | U |
| b2757 | ygcI | 2878396 | 2879070 | - | 674  | 27  | 9  | 14 | 14 | 16 | 33%  | 52%  | 52%  | 59%  | P | P | P | P | U |
| b2758 | ygcJ | 2879073 | 2880164 | - | 1091 | 44  | 0  | 0  | 0  | 1  | 0%   | 0%   | 0%   | 2%   | A | A | A | P | U |
| b2759 | ygcK | 2880177 | 2880659 | - | 482  | 20  | 0  | 0  | 0  | 0  | 0%   | 0%   | 0%   | 0%   | A | A | A | A | U |
| b2760 | ygcL | 2880652 | 2882160 | - | 1508 | 60  | 0  | 0  | 0  | 0  | 0%   | 0%   | 0%   | 0%   | A | A | A | A | U |
| b2761 | ygcB | 2882575 | 2885241 | - | 2666 | 107 | 0  | 1  | 29 | 31 | 0%   | 1%   | 27%  | 29%  | A | P | P | P | U |
| b2762 | cysH | 2885600 | 2886334 | - | 734  | 30  | 30 | 30 | 30 | 30 | 100% | 100% | 100% | 100% | P | P | P | P |   |
| b2763 | cysI | 2886409 | 2888121 | - | 1712 | 68  | 68 | 68 | 68 | 68 | 100% | 100% | 100% | 100% | P | P | P | P |   |
| b2764 | cysJ | 2888121 | 2889920 | - | 1799 | 72  | 72 | 72 | 72 | 72 | 100% | 100% | 100% | 100% | P | P | P | P |   |
| b2769 | ygcQ | 2892941 | 2893801 | - | 860  | 34  | 0  | 2  | 3  | 3  | 0%   | 6%   | 9%   | 9%   | A | P | P | P | U |
| b2770 | ygcR | 2893798 | 2894577 | - | 779  | 31  | 0  | 1  | 1  | 1  | 0%   | 3%   | 3%   | 3%   | A | P | P | P | U |
| b2771 | ygcS | 2894555 | 2895892 | - | 1337 | 53  | 0  | 0  | 4  | 4  | 0%   | 0%   | 8%   | 8%   | A | A | P | P | U |
| b4463 | ygcU | 2895986 | 2897440 | - | 1454 | 58  | 0  | 0  | 2  | 2  | 0%   | 0%   | 3%   | 3%   | A | A | P | P | U |
| b2774 | ygcW | 2897510 | 2898295 | - | 785  | 31  | 0  | 0  | 1  | 1  | 0%   | 0%   | 3%   | 3%   | A | A | P | P | U |
| b2777 | ygcF | 2902769 | 2903440 | - | 671  | 27  | 24 | 25 | 26 | 26 | 89%  | 93%  | 96%  | 96%  | P | P | P | P | U |
| b2779 | eno  | 2904665 | 2905963 | - | 1298 | 52  | 52 | 52 | 52 | 52 | 100% | 100% | 100% | 100% | P | P | P | P |   |
| b2780 | pyrG | 2906051 | 2907688 | - | 1637 | 66  | 66 | 66 | 66 | 66 | 100% | 100% | 100% | 100% | P | P | P | P |   |
| b2781 | mazG | 2907916 | 2908707 | - | 791  | 31  | 29 | 29 | 29 | 29 | 94%  | 94%  | 94%  | 94%  | P | P | P | P |   |
| b2782 | chpA | 2908778 | 2909113 | - | 335  | 14  | 13 | 13 | 13 | 13 | 93%  | 93%  | 93%  | 93%  | P | P | P | P |   |
| b2783 | chpR | 2909113 | 2909361 | - | 248  | 10  | 10 | 10 | 10 | 10 | 100% | 100% | 100% | 100% | P | P | P | P |   |
| b2784 | relA | 2909439 | 2911673 | - | 2234 | 89  | 89 | 89 | 89 | 89 | 100% | 100% | 100% | 100% | P | P | P | P |   |
| b2785 | rumA | 2911721 | 2913022 | - | 1301 | 52  | 50 | 50 | 50 | 50 | 96%  | 96%  | 96%  | 96%  | P | P | P | P |   |
| b2787 | gudD | 2916067 | 2917407 | - | 1340 | 53  | 0  | 10 | 18 | 21 | 0%   | 19%  | 34%  | 40%  | A | P | P | P |   |
| b2788 | gudX | 2917428 | 2918768 | - | 1340 | 54  | 0  | 0  | 0  | 0  | 0%   | 0%   | 0%   | 0%   | A | A | A | A | U |
| b2789 | gudP | 2918770 | 2920122 | - | 1352 | 54  | 0  | 3  | 5  | 5  | 0%   | 6%   | 9%   | 9%   | A | P | P | P | U |
| b2790 | yqcA | 2920557 | 2921006 | - | 449  | 18  | 16 | 16 | 16 | 16 | 89%  | 89%  | 89%  | 89%  | P | P | P | P | U |
| b2791 | truC | 2921024 | 2921806 | - | 782  | 31  | 29 | 29 | 29 | 29 | 94%  | 94%  | 94%  | 94%  | P | P | P | P |   |
| b2792 | yqcC | 2921806 | 2922135 | - | 329  | 13  | 13 | 13 | 13 | 13 | 100% | 100% | 100% | 100% | P | P | P | P | U |



|       |      |         |         |   |      |     |     |     |     |     |      |      |      |      |   |   |   |   |   |
|-------|------|---------|---------|---|------|-----|-----|-----|-----|-----|------|------|------|------|---|---|---|---|---|
| b4408 | csrB | 2922178 | 2922537 | - | 359  | 14  | 13  | 13  | 13  | 13  | 93%  | 93%  | 93%  | 93%  | P | P | P | P |   |
| b2793 | syd  | 2922757 | 2923302 | - | 545  | 22  | 20  | 20  | 20  | 20  | 91%  | 91%  | 91%  | 91%  | P | P | P | P | U |
| b2799 | fucO | 2929887 | 2931038 | - | 1151 | 46  | 11  | 25  | 25  | 25  | 24%  | 54%  | 54%  | 54%  | P | P | P | P |   |
| b2800 | fucA | 2931063 | 2931710 | - | 647  | 26  | 2   | 6   | 7   | 7   | 8%   | 23%  | 27%  | 27%  | P | P | P | P |   |
| b2806 | ygdE | 2938165 | 2939265 | - | 1100 | 44  | 39  | 39  | 40  | 40  | 89%  | 89%  | 91%  | 91%  | P | P | P | P | U |
| b2807 | ygdD | 2939258 | 2939653 | - | 395  | 16  | 16  | 16  | 16  | 16  | 100% | 100% | 100% | 100% | P | P | P | P | U |
| b2808 | gcvA | 2939672 | 2940589 | - | 917  | 37  | 34  | 34  | 34  | 34  | 92%  | 92%  | 92%  | 92%  | P | P | P | P |   |
| b2809 | ygdI | 2940940 | 2941167 | - | 227  | 9   | 6   | 9   | 9   | 9   | 67%  | 100% | 100% | 100% | P | P | P | P | U |
| b2812 | ygdL | 2943058 | 2943864 | - | 806  | 32  | 31  | 31  | 32  | 32  | 97%  | 97%  | 100% | 100% | P | P | P | P | U |
| b2813 | mltA | 2944103 | 2945200 | - | 1097 | 44  | 44  | 44  | 44  | 44  | 100% | 100% | 100% | 100% | P | P | P | P |   |
| b2817 | amiC | 2945779 | 2947032 | - | 1253 | 50  | 50  | 50  | 50  | 50  | 100% | 100% | 100% | 100% | P | P | P | P |   |
| b2819 | recD | 2948657 | 2950483 | - | 1826 | 73  | 58  | 58  | 58  | 59  | 79%  | 79%  | 79%  | 81%  | P | P | P | P |   |
| b2820 | recB | 2950483 | 2954025 | - | 3542 | 142 | 138 | 138 | 138 | 138 | 97%  | 97%  | 97%  | 97%  | P | P | P | P |   |
| b2821 | ptrA | 2954018 | 2956906 | - | 2888 | 116 | 106 | 106 | 106 | 107 | 91%  | 91%  | 91%  | 92%  | P | P | P | P |   |
| b2822 | recC | 2957082 | 2960450 | - | 3368 | 135 | 115 | 115 | 115 | 115 | 85%  | 85%  | 85%  | 85%  | P | P | P | P |   |
| b2823 | ppdC | 2960463 | 2960786 | - | 323  | 13  | 2   | 4   | 4   | 4   | 15%  | 31%  | 31%  | 31%  | P | P | P | P | U |
| b2824 | ygdB | 2960771 | 2961178 | - | 407  | 17  | 0   | 1   | 1   | 1   | 0%   | 6%   | 6%   | 6%   | A | P | P | P | U |
| b2825 | ppdB | 2961175 | 2961738 | - | 563  | 23  | 0   | 0   | 0   | 0   | 0%   | 0%   | 0%   | 0%   | A | A | A | A | U |
| b2826 | ppdA | 2961729 | 2962199 | - | 470  | 18  | 0   | 1   | 2   | 2   | 0%   | 6%   | 11%  | 11%  | A | P | P | P | U |
| b2827 | thyA | 2962383 | 2963177 | - | 794  | 32  | 32  | 32  | 32  | 32  | 100% | 100% | 100% | 100% | P | P | P | P |   |
| b2828 | lgt  | 2963184 | 2964059 | - | 875  | 35  | 35  | 35  | 35  | 35  | 100% | 100% | 100% | 100% | P | P | P | P |   |
| b2829 | ptsP | 2964210 | 2966456 | - | 2246 | 90  | 88  | 88  | 88  | 88  | 98%  | 98%  | 98%  | 98%  | P | P | P | P |   |
| b2830 | rppH | 2966469 | 2966999 | - | 530  | 21  | 21  | 21  | 21  | 21  | 100% | 100% | 100% | 100% | P | P | P | P |   |
| b4610 | ygdT | 2967352 | 2967498 | - | 146  | 5   | 0   | 0   | 0   | 0   | 0%   | 0%   | 0%   | 0%   | A | A | A | A | U |
| b2835 | lplT | 2970691 | 2971884 | - | 1193 | 48  | 36  | 36  | 39  | 39  | 75%  | 75%  | 81%  | 81%  | P | P | P | P | U |
| b2836 | aas  | 2971877 | 2974036 | - | 2159 | 87  | 76  | 76  | 76  | 77  | 87%  | 87%  | 87%  | 89%  | P | P | P | P |   |
| b4444 | omrA | 2974124 | 2974211 | - | 87   | 4   | 1   | 1   | 2   | 2   | 25%  | 25%  | 50%  | 50%  | P | P | P | P |   |
| b4445 | omrB | 2974332 | 2974407 | - | 75   | 3   | 1   | 1   | 1   | 2   | 33%  | 33%  | 33%  | 67%  | P | P | P | P |   |
| b2838 | lysA | 2975659 | 2976921 | - | 1262 | 50  | 50  | 50  | 50  | 50  | 100% | 100% | 100% | 100% | P | P | P | P |   |
| b2840 | ygeA | 2977965 | 2978657 | - | 692  | 28  | 27  | 27  | 27  | 27  | 96%  | 96%  | 96%  | 96%  | P | P | P | P | U |
| b2841 | araE | 2978786 | 2980204 | - | 1418 | 57  | 9   | 9   | 17  | 18  | 16%  | 16%  | 30%  | 32%  | P | P | P | P |   |
| b2842 | kduD | 2980519 | 2981280 | - | 761  | 31  | 14  | 16  | 17  | 18  | 45%  | 52%  | 55%  | 58%  | P | P | P | P |   |
| b2843 | kduI | 2981310 | 2982146 | - | 836  | 33  | 1   | 1   | 3   | 4   | 3%   | 3%   | 9%   | 12%  | P | P | P | P | U |
| b2844 | yqeF | 2982433 | 2983614 | - | 1181 | 47  | 40  | 40  | 40  | 40  | 85%  | 85%  | 85%  | 85%  | P | P | P | P | U |
| b2849 | yqeK | 2987957 | 2988382 | - | 425  | 16  | 0   | 0   | 0   | 0   | 0%   | 0%   | 0%   | 0%   | A | A | A | A | U |
| b2856 | ygeK | 2992482 | 2993114 | - | 632  | 25  | 0   | 0   | 0   | 0   | 0%   | 0%   | 0%   | 0%   | A | A | A | A | U |
| b2858 | ygeN | 2993336 | 2994042 | - | 706  | 28  | 0   | 0   | 0   | 0   | 0%   | 0%   | 0%   | 0%   | A | A | A | A | U |
| b2859 | ygeO | 2993984 | 2994382 | - | 398  | 16  | 0   | 1   | 1   | 1   | 0%   | 6%   | 6%   | 6%   | A | P | P | P | U |
| b2860 | insD | 2994394 | 2995299 | - | 905  | 36  | 36  | 36  | 36  | 36  | 100% | 100% | 100% | 100% | P | P | P | P |   |
| b2861 | insC | 2995257 | 2995622 | - | 365  | 14  | 14  | 14  | 14  | 14  | 100% | 100% | 100% | 100% | P | P | P | P |   |
| b2863 | ygeQ | 2995714 | 2996850 | - | 1136 | 46  | 0   | 12  | 14  | 14  | 0%   | 26%  | 30%  | 30%  | A | P | P | P | U |
| b2864 | glyU | 2997006 | 2997079 | - | 73   | 3   | 3   | 3   | 3   | 3   | 100% | 100% | 100% | 100% | P | P | P | P |   |
| b2865 | ygeR | 2997158 | 2997913 | - | 755  | 30  | 25  | 25  | 25  | 25  | 83%  | 83%  | 83%  | 83%  | P | P | P | P |   |
| b2869 | ygeV | 3002030 | 3003808 | - | 1778 | 71  | 0   | 2   | 61  | 61  | 0%   | 3%   | 86%  | 86%  | A | P | P | P | U |
| b2875 | yqeB | 3010636 | 3012261 | - | 1625 | 65  | 2   | 3   | 12  | 63  | 3%   | 5%   | 18%  | 97%  | P | P | P | P | U |
| b2876 | yqeC | 3012309 | 3013079 | - | 770  | 31  | 0   | 1   | 1   | 12  | 0%   | 3%   | 3%   | 39%  | A | P | P | P | U |

|       |      |         |         |   |      |     |     |     |     |     |      |      |      |      |   |   |   |   |   |
|-------|------|---------|---------|---|------|-----|-----|-----|-----|-----|------|------|------|------|---|---|---|---|---|
| b2886 | ygfS | 3026546 | 3027034 | - | 488  | 20  | 0   | 2   | 4   | 4   | 0%   | 10%  | 20%  | 20%  | A | P | P | P | U |
| b2887 | ygfT | 3027034 | 3028953 | - | 1919 | 77  | 0   | 2   | 5   | 5   | 0%   | 3%   | 6%   | 6%   | A | P | P | P | U |
| b2890 | lysS | 3031679 | 3033196 | - | 1517 | 60  | 56  | 56  | 56  | 56  | 93%  | 93%  | 93%  | 93%  | P | P | P | P |   |
| b2891 | prfB | 3033206 | 3034304 | - | 1098 | 44  | 44  | 44  | 44  | 44  | 100% | 100% | 100% | 100% | P | P | P | P |   |
| b2892 | recJ | 3034395 | 3036128 | - | 1733 | 70  | 69  | 69  | 69  | 69  | 99%  | 99%  | 99%  | 99%  | P | P | P | P |   |
| b2893 | dsbC | 3036134 | 3036844 | - | 710  | 28  | 28  | 28  | 28  | 28  | 100% | 100% | 100% | 100% | P | P | P | P |   |
| b2894 | xerD | 3036869 | 3037765 | - | 896  | 36  | 36  | 36  | 36  | 36  | 100% | 100% | 100% | 100% | P | P | P | P |   |
| b2896 | ygfX | 3038438 | 3038845 | - | 407  | 16  | 16  | 16  | 16  | 16  | 100% | 100% | 100% | 100% | P | P | P | P | U |
| b2897 | ygfY | 3038826 | 3039092 | - | 266  | 11  | 11  | 11  | 11  | 11  | 100% | 100% | 100% | 100% | P | P | P | P | U |
| b2899 | yqfA | 3040511 | 3041170 | - | 659  | 26  | 21  | 25  | 25  | 25  | 81%  | 96%  | 96%  | 96%  | P | P | P | P | U |
| b2900 | yqfB | 3041334 | 3041645 | - | 311  | 12  | 12  | 12  | 12  | 12  | 100% | 100% | 100% | 100% | P | P | P | P | U |
| b2902 | ygfF | 3043180 | 3043923 | - | 743  | 29  | 19  | 19  | 19  | 19  | 66%  | 66%  | 66%  | 66%  | P | P | P | P | U |
| b2903 | gcvP | 3044190 | 3047063 | - | 2873 | 115 | 114 | 114 | 114 | 114 | 99%  | 99%  | 99%  | 99%  | P | P | P | P |   |
| b2904 | gcvH | 3047182 | 3047571 | - | 389  | 15  | 15  | 15  | 15  | 15  | 100% | 100% | 100% | 100% | P | P | P | P |   |
| b2905 | gcvT | 3047595 | 3048689 | - | 1094 | 44  | 44  | 44  | 44  | 44  | 100% | 100% | 100% | 100% | P | P | P | P |   |
| b2906 | visC | 3049137 | 3050339 | - | 1202 | 48  | 46  | 46  | 46  | 46  | 96%  | 96%  | 96%  | 96%  | P | P | P | P | U |
| b2907 | ubiH | 3050362 | 3051540 | - | 1178 | 47  | 47  | 47  | 47  | 47  | 100% | 100% | 100% | 100% | P | P | P | P |   |
| b2908 | pepP | 3051537 | 3052862 | - | 1325 | 53  | 53  | 53  | 53  | 53  | 100% | 100% | 100% | 100% | P | P | P | P |   |
| b2909 | ygfB | 3052888 | 3053466 | - | 578  | 23  | 23  | 23  | 23  | 23  | 100% | 100% | 100% | 100% | P | P | P | P | U |
| b2913 | serA | 3055200 | 3056432 | - | 1232 | 50  | 50  | 50  | 50  | 50  | 100% | 100% | 100% | 100% | P | P | P | P |   |
| b2914 | rpiA | 3056688 | 3057347 | - | 659  | 26  | 25  | 25  | 25  | 25  | 96%  | 96%  | 96%  | 96%  | P | P | P | P |   |
| b2915 | yqfE | 3057403 | 3057723 | - | 320  | 12  | 2   | 2   | 2   | 2   | 17%  | 17%  | 17%  | 17%  | P | P | P | P | U |
| b2921 | ygfI | 3064299 | 3065195 | - | 896  | 36  | 0   | 0   | 0   | 0   | 0%   | 0%   | 0%   | 0%   | A | A | A | A | U |
| b2922 | yggE | 3065362 | 3066102 | - | 740  | 29  | 29  | 29  | 29  | 29  | 100% | 100% | 100% | 100% | P | P | P | P | U |
| b2923 | argO | 3066195 | 3066830 | - | 635  | 25  | 20  | 20  | 21  | 22  | 80%  | 80%  | 84%  | 88%  | P | P | P | P |   |
| b2924 | mscS | 3066969 | 3067829 | - | 860  | 34  | 34  | 34  | 34  | 34  | 100% | 100% | 100% | 100% | P | P | P | P |   |
| b2925 | fbaA | 3068187 | 3069266 | - | 1079 | 43  | 42  | 42  | 42  | 42  | 98%  | 98%  | 98%  | 98%  | P | P | P | P |   |
| b2926 | pgk  | 3069481 | 3070644 | - | 1163 | 47  | 47  | 47  | 47  | 47  | 100% | 100% | 100% | 100% | P | P | P | P |   |
| b2927 | epd  | 3070694 | 3071713 | - | 1019 | 41  | 40  | 40  | 40  | 40  | 98%  | 98%  | 98%  | 98%  | P | P | P | P |   |
| b2928 | yggC | 3071998 | 3072711 | - | 713  | 29  | 28  | 28  | 28  | 28  | 97%  | 97%  | 97%  | 97%  | P | P | P | P | U |
| b2929 | yggD | 3072708 | 3073217 | - | 509  | 21  | 21  | 21  | 21  | 21  | 100% | 100% | 100% | 100% | P | P | P | P | U |
| b2930 | yggF | 3073239 | 3074204 | - | 965  | 38  | 0   | 7   | 12  | 12  | 0%   | 18%  | 32%  | 32%  | A | P | P | P | U |
| b4465 | yggP | 3074201 | 3075478 | - | 1277 | 51  | 0   | 5   | 6   | 6   | 0%   | 10%  | 12%  | 12%  | A | P | P | P | U |
| b2933 | cmtA | 3075493 | 3076881 | - | 1388 | 55  | 0   | 1   | 4   | 4   | 0%   | 2%   | 7%   | 7%   | A | P | P | P | U |
| b2934 | cmtB | 3076909 | 3077352 | - | 443  | 17  | 0   | 0   | 0   | 0   | 0%   | 0%   | 0%   | 0%   | A | A | A | A | U |
| b2935 | tktA | 3077666 | 3079657 | - | 1991 | 80  | 79  | 79  | 79  | 79  | 99%  | 99%  | 99%  | 99%  | P | P | P | P |   |
| b2937 | speB | 3080899 | 3081819 | - | 920  | 36  | 36  | 36  | 36  | 36  | 100% | 100% | 100% | 100% | P | P | P | P |   |
| b2938 | speA | 3081957 | 3083933 | - | 1976 | 79  | 79  | 79  | 79  | 79  | 100% | 100% | 100% | 100% | P | P | P | P |   |
| b2939 | yqgB | 3083942 | 3084073 | - | 131  | 5   | 5   | 5   | 5   | 5   | 100% | 100% | 100% | 100% | P | P | P | P | U |
| b2941 | yqgD | 3084421 | 3084672 | - | 251  | 10  | 0   | 0   | 0   | 0   | 0%   | 0%   | 0%   | 0%   | A | A | A | A | U |
| b2950 | yggR | 3092122 | 3093102 | - | 980  | 40  | 0   | 0   | 0   | 0   | 0%   | 0%   | 0%   | 0%   | A | A | A | A | U |
| b2956 | yggM | 3096580 | 3097587 | - | 1007 | 40  | 0   | 0   | 0   | 0   | 0%   | 0%   | 0%   | 0%   | A | A | A | A | U |
| b2957 | ansB | 3097704 | 3098750 | - | 1046 | 42  | 0   | 14  | 14  | 14  | 0%   | 33%  | 33%  | 33%  | A | P | P | P |   |
| b2958 | yggN | 3098926 | 3099645 | - | 719  | 28  | 26  | 26  | 26  | 27  | 93%  | 93%  | 93%  | 96%  | P | P | P | P | U |
| b2959 | yggL | 3099829 | 3100155 | - | 326  | 13  | 13  | 13  | 13  | 13  | 100% | 100% | 100% | 100% | P | P | P | P | U |
| b2960 | trmI | 3100155 | 3100874 | - | 719  | 29  | 29  | 29  | 29  | 29  | 100% | 100% | 100% | 100% | P | P | P | P |   |

|       |      |         |         |   |      |     |     |     |     |     |      |      |      |      |   |   |   |   |   |
|-------|------|---------|---------|---|------|-----|-----|-----|-----|-----|------|------|------|------|---|---|---|---|---|
| b2965 | speC | 3105042 | 3107177 | - | 2135 | 85  | 80  | 80  | 80  | 82  | 94%  | 94%  | 94%  | 96%  | P | P | P | P |   |
| b2968 | yghD | 3108612 | 3109148 | - | 536  | 22  | 0   | 2   | 2   | 2   | 0%   | 9%   | 9%   | 9%   | A | P | P | P | U |
| b2969 | yghE | 3109150 | 3110112 | - | 962  | 38  | 0   | 0   | 0   | 0   | 0%   | 0%   | 0%   | 0%   | A | A | A | A | U |
| b2970 | yghF | 3110115 | 3110942 | - | 827  | 33  | 10  | 10  | 10  | 10  | 30%  | 30%  | 30%  | 30%  | P | P | P | P | U |
| b2971 | yghG | 3111089 | 3111499 | - | 410  | 16  | 14  | 14  | 14  | 14  | 88%  | 88%  | 88%  | 88%  | P | P | P | P | U |
| b2972 | pppA | 3111565 | 3112374 | - | 809  | 32  | 17  | 17  | 17  | 17  | 53%  | 53%  | 53%  | 53%  | P | P | P | P |   |
| b4466 | yghJ | 3112572 | 3117134 | - | 4562 | 182 | 160 | 160 | 162 | 162 | 88%  | 88%  | 89%  | 89%  | P | P | P | P | U |
| b2975 | glcA | 3117619 | 3119301 | - | 1682 | 67  | 0   | 3   | 7   | 10  | 0%   | 4%   | 10%  | 15%  | A | P | P | P |   |
| b2976 | glcB | 3119656 | 3121827 | - | 2171 | 87  | 81  | 81  | 82  | 82  | 93%  | 93%  | 94%  | 94%  | P | P | P | P |   |
| b2977 | glcG | 3121849 | 3122253 | - | 404  | 16  | 15  | 15  | 15  | 15  | 94%  | 94%  | 94%  | 94%  | P | P | P | P | U |
| b4467 | glcF | 3122258 | 3123481 | - | 1223 | 49  | 20  | 20  | 22  | 22  | 41%  | 41%  | 45%  | 45%  | P | P | P | P |   |
| b4468 | glcE | 3123492 | 3124544 | - | 1052 | 42  | 0   | 0   | 0   | 0   | 0%   | 0%   | 0%   | 0%   | A | A | A | A |   |
| b2979 | glcD | 3124544 | 3126043 | - | 1499 | 60  | 0   | 0   | 5   | 5   | 0%   | 0%   | 8%   | 8%   | A | A | P | P |   |
| b2981 | yghO | 3127065 | 3128165 | - | 1100 | 44  | 0   | 0   | 0   | 0   | 0%   | 0%   | 0%   | 0%   | A | A | A | A | U |
| b2983 | yghQ | 3129363 | 3130430 | - | 1067 | 43  | 0   | 0   | 0   | 0   | 0%   | 0%   | 0%   | 0%   | A | A | A | A | U |
| b2984 | yghR | 3130476 | 3131234 | - | 758  | 30  | 0   | 0   | 0   | 0   | 0%   | 0%   | 0%   | 0%   | A | A | A | A | U |
| b2985 | yghS | 3131266 | 3131979 | - | 713  | 28  | 0   | 0   | 0   | 0   | 0%   | 0%   | 0%   | 0%   | A | A | A | A | U |
| b2987 | pitB | 3132894 | 3134393 | - | 1499 | 60  | 0   | 0   | 0   | 0   | 0%   | 0%   | 0%   | 0%   | A | A | A | A |   |
| b2988 | gsp  | 3134685 | 3136544 | - | 1859 | 75  | 69  | 69  | 69  | 73  | 92%  | 92%  | 92%  | 97%  | P | P | P | P |   |
| b2990 | hybG | 3137738 | 3137986 | - | 248  | 10  | 4   | 4   | 4   | 4   | 40%  | 40%  | 40%  | 40%  | P | P | P | P |   |
| b2991 | hybF | 3137999 | 3138340 | - | 341  | 14  | 3   | 3   | 3   | 3   | 21%  | 21%  | 21%  | 21%  | P | P | P | P |   |
| b2992 | hybE | 3138333 | 3138821 | - | 488  | 20  | 12  | 12  | 12  | 12  | 60%  | 60%  | 60%  | 60%  | P | P | P | P |   |
| b2993 | hybD | 3138814 | 3139308 | - | 494  | 19  | 17  | 17  | 17  | 17  | 89%  | 89%  | 89%  | 89%  | P | P | P | P | U |
| b2994 | hybC | 3139308 | 3141011 | - | 1703 | 68  | 59  | 59  | 59  | 61  | 87%  | 87%  | 87%  | 90%  | P | P | P | P |   |
| b2995 | hybB | 3141008 | 3142186 | - | 1178 | 47  | 2   | 2   | 2   | 4   | 4%   | 4%   | 4%   | 9%   | P | P | P | P | U |
| b2996 | hybA | 3142176 | 3143162 | - | 986  | 39  | 5   | 7   | 7   | 10  | 13%  | 18%  | 18%  | 26%  | P | P | P | P |   |
| b2997 | hybO | 3143165 | 3144283 | - | 1118 | 44  | 4   | 20  | 20  | 33  | 9%   | 45%  | 45%  | 75%  | P | P | P | P |   |
| b2998 | yghW | 3144472 | 3144759 | - | 287  | 11  | 0   | 0   | 0   | 11  | 0%   | 0%   | 0%   | 100% | A | A | A | P | U |
| b4658 | yghX | 3144878 | 3145713 | - | 835  | 34  | 15  | 19  | 29  | 29  | 44%  | 56%  | 85%  | 85%  | P | P | P | P | U |
| b3002 | yqhA | 3146999 | 3147493 | - | 494  | 20  | 20  | 20  | 20  | 20  | 100% | 100% | 100% | 100% | P | P | P | P | U |
| b3005 | exbD | 3148840 | 3149265 | - | 425  | 17  | 15  | 15  | 15  | 17  | 88%  | 88%  | 88%  | 100% | P | P | P | P |   |
| b3006 | exbB | 3149272 | 3150006 | - | 734  | 29  | 29  | 29  | 29  | 29  | 100% | 100% | 100% | 100% | P | P | P | P |   |
| b3010 | yqhC | 3152284 | 3153240 | - | 956  | 38  | 31  | 32  | 35  | 35  | 82%  | 84%  | 92%  | 92%  | P | P | P | P | U |
| b4469 | ygiQ | 3156949 | 3159168 | - | 2219 | 88  | 82  | 82  | 83  | 83  | 93%  | 93%  | 94%  | 94%  | P | P | P | P | U |
| b3017 | ftsP | 3159279 | 3160691 | - | 1412 | 56  | 56  | 56  | 56  | 56  | 100% | 100% | 100% | 100% | P | P | P | P |   |
| b3018 | plsC | 3160766 | 3161503 | - | 737  | 30  | 30  | 30  | 30  | 30  | 100% | 100% | 100% | 100% | P | P | P | P |   |
| b3019 | parC | 3161737 | 3163995 | - | 2258 | 90  | 90  | 90  | 90  | 90  | 100% | 100% | 100% | 100% | P | P | P | P |   |
| b3020 | ygiS | 3164133 | 3165740 | - | 1607 | 64  | 22  | 23  | 24  | 24  | 34%  | 36%  | 38%  | 38%  | P | P | P | P | U |
| b3021 | ygiT | 3165873 | 3166268 | - | 395  | 16  | 8   | 14  | 15  | 15  | 50%  | 88%  | 94%  | 94%  | P | P | P | P | U |
| b3022 | mqsR | 3166270 | 3166566 | - | 296  | 12  | 11  | 12  | 12  | 12  | 92%  | 100% | 100% | 100% | P | P | P | P | U |
| b3023 | ygiV | 3166771 | 3167253 | - | 482  | 20  | 11  | 13  | 13  | 16  | 55%  | 65%  | 65%  | 80%  | P | P | P | P | U |
| b3024 | ygiW | 3167306 | 3167698 | - | 392  | 15  | 15  | 15  | 15  | 15  | 100% | 100% | 100% | 100% | P | P | P | P | U |
| b3027 | ygiZ | 3169901 | 3170233 | - | 332  | 13  | 0   | 0   | 0   | 0   | 0%   | 0%   | 0%   | 0%   | A | A | A | A | U |
| b3030 | parE | 3171526 | 3173418 | - | 1892 | 76  | 76  | 76  | 76  | 76  | 100% | 100% | 100% | 100% | P | P | P | P |   |
| b3031 | yqiA | 3173447 | 3174028 | - | 581  | 24  | 24  | 24  | 24  | 24  | 100% | 100% | 100% | 100% | P | P | P | P | U |
| b3032 | cpdA | 3174028 | 3174855 | - | 827  | 33  | 33  | 33  | 33  | 33  | 100% | 100% | 100% | 100% | P | P | P | P |   |

|         |      |         |         |   |      |     |     |     |     |     |      |      |      |      |   |   |   |   |   |
|---------|------|---------|---------|---|------|-----|-----|-----|-----|-----|------|------|------|------|---|---|---|---|---|
| b3033   | yqiB | 3174880 | 3175302 | - | 422  | 17  | 17  | 17  | 17  | 17  | 100% | 100% | 100% | 100% | P | P | P | P | U |
| b3034   | nudF | 3175303 | 3175932 | - | 629  | 25  | 25  | 25  | 25  | 25  | 100% | 100% | 100% | 100% | P | P | P | P |   |
| b3039   | ygiD | 3179641 | 3180456 | - | 815  | 33  | 0   | 1   | 2   | 7   | 0%   | 3%   | 6%   | 21%  | A | P | P | P | U |
| b3041   | ribB | 3181835 | 3182488 | - | 653  | 26  | 26  | 26  | 26  | 26  | 100% | 100% | 100% | 100% | P | P | P | P |   |
| G0-9387 | sroG | 3182592 | 3182740 | - | 148  | 6   | 6   | 6   | 6   | 6   | 100% | 100% | 100% | 100% | P | P | P | P |   |
| b3049   | glgS | 3189761 | 3189961 | - | 200  | 8   | 8   | 8   | 8   | 8   | 100% | 100% | 100% | 100% | P | P | P | P | U |
| b4447   | rygD | 3192745 | 3192887 | - | 142  | 6   | 5   | 5   | 5   | 5   | 83%  | 83%  | 83%  | 83%  | P | P | P | P | U |
| b4611   | rygE | 3193121 | 3193262 | - | 141  | 6   | 5   | 5   | 5   | 5   | 83%  | 83%  | 83%  | 83%  | P | P | P | P | U |
| b3052   | rfaE | 3193342 | 3194775 | - | 1433 | 57  | 56  | 56  | 56  | 56  | 98%  | 98%  | 98%  | 98%  | P | P | P | P |   |
| b3053   | glnE | 3194823 | 3197663 | - | 2840 | 114 | 113 | 113 | 113 | 113 | 99%  | 99%  | 99%  | 99%  | P | P | P | P |   |
| b3054   | ygiF | 3197686 | 3198987 | - | 1301 | 52  | 52  | 52  | 52  | 52  | 100% | 100% | 100% | 100% | P | P | P | P | U |
| b3057   | bacA | 3201332 | 3202153 | - | 821  | 33  | 26  | 26  | 26  | 26  | 79%  | 79%  | 79%  | 79%  | P | P | P | P |   |
| b3058   | folB | 3202243 | 3202611 | - | 368  | 15  | 15  | 15  | 15  | 15  | 100% | 100% | 100% | 100% | P | P | P | P |   |
| b3060   | ttdR | 3203346 | 3204278 | - | 932  | 38  | 0   | 1   | 1   | 16  | 0%   | 3%   | 3%   | 42%  | A | P | P | P | U |
| b3064   | ygjD | 3207552 | 3208565 | - | 1013 | 41  | 41  | 41  | 41  | 41  | 100% | 100% | 100% | 100% | P | P | P | P | U |
| b3068   | mug  | 3212989 | 3213495 | - | 506  | 20  | 20  | 20  | 20  | 20  | 100% | 100% | 100% | 100% | P | P | P | P |   |
| b3070   | yqjH | 3213749 | 3214513 | - | 764  | 31  | 29  | 29  | 29  | 29  | 94%  | 94%  | 94%  | 94%  | P | P | P | P | U |
| b3072   | aer  | 3215578 | 3217098 | - | 1520 | 60  | 26  | 26  | 26  | 26  | 43%  | 43%  | 43%  | 43%  | P | P | P | P |   |
| b3074   | ygjH | 3218937 | 3219269 | - | 332  | 13  | 0   | 2   | 2   | 2   | 0%   | 15%  | 15%  | 15%  | A | P | P | P | U |
| b3082   | ygjM | 3231750 | 3232166 | - | 416  | 17  | 9   | 14  | 14  | 14  | 53%  | 82%  | 82%  | 82%  | P | P | P | P | U |
| b3083   | ygjN | 3232163 | 3232477 | - | 314  | 12  | 4   | 6   | 6   | 6   | 33%  | 50%  | 50%  | 50%  | P | P | P | P | U |
| b3084   | rlmG | 3232761 | 3233897 | - | 1136 | 45  | 28  | 28  | 29  | 29  | 62%  | 62%  | 64%  | 64%  | P | P | P | P | U |
| b3090   | ygjV | 3239215 | 3239766 | - | 551  | 21  | 0   | 0   | 0   | 0   | 0%   | 0%   | 0%   | 0%   | A | A | A | A | U |
| b3091   | uxaA | 3239849 | 3241336 | - | 1487 | 59  | 9   | 18  | 18  | 18  | 15%  | 31%  | 31%  | 31%  | P | P | P | P |   |
| b3092   | uxaC | 3241351 | 3242763 | - | 1412 | 56  | 18  | 46  | 46  | 46  | 32%  | 82%  | 82%  | 82%  | P | P | P | P |   |
| b3105   | yhaJ | 3251340 | 3252236 | - | 896  | 36  | 34  | 34  | 34  | 34  | 94%  | 94%  | 94%  | 94%  | P | P | P | P | U |
| b4470   | yhaM | 3253363 | 3254673 | - | 1310 | 52  | 0   | 11  | 11  | 11  | 0%   | 21%  | 21%  | 21%  | A | P | P | P | U |
| b3110   | yhaO | 3254701 | 3256032 | - | 1331 | 53  | 0   | 3   | 6   | 6   | 0%   | 6%   | 11%  | 11%  | A | P | P | P | U |
| b4471   | tdcG | 3256307 | 3257671 | - | 1364 | 54  | 0   | 3   | 5   | 6   | 0%   | 6%   | 9%   | 11%  | A | P | P | P |   |
| b3113   | tdcF | 3257743 | 3258132 | - | 389  | 16  | 0   | 1   | 1   | 2   | 0%   | 6%   | 6%   | 13%  | A | P | P | P | U |
| b3114   | tdcE | 3258146 | 3260440 | - | 2294 | 92  | 0   | 1   | 4   | 8   | 0%   | 1%   | 4%   | 9%   | A | P | P | P |   |
| b3115   | tdcD | 3260474 | 3261682 | - | 1208 | 49  | 0   | 0   | 0   | 0   | 0%   | 0%   | 0%   | 0%   | A | A | A | A |   |
| b3116   | tdcC | 3261708 | 3263039 | - | 1331 | 53  | 0   | 0   | 0   | 0   | 0%   | 0%   | 0%   | 0%   | A | A | A | A |   |
| b3117   | tdcB | 3263061 | 3264050 | - | 989  | 39  | 0   | 0   | 0   | 0   | 0%   | 0%   | 0%   | 0%   | A | A | A | A |   |
| b3118   | tdcA | 3264149 | 3265087 | - | 938  | 38  | 0   | 0   | 0   | 0   | 0%   | 0%   | 0%   | 0%   | A | A | A | A |   |
| b3123   | rnpB | 3268238 | 3268614 | - | 376  | 15  | 15  | 15  | 15  | 15  | 100% | 100% | 100% | 100% | P | P | P | P |   |
| b3124   | garK | 3268647 | 3269792 | - | 1145 | 45  | 21  | 23  | 30  | 30  | 47%  | 51%  | 67%  | 67%  | P | P | P | P |   |
| b3125   | garR | 3269889 | 3270773 | - | 884  | 36  | 21  | 23  | 23  | 24  | 58%  | 64%  | 64%  | 67%  | P | P | P | P |   |
| b3126   | garL | 3270809 | 3271579 | - | 770  | 31  | 0   | 3   | 4   | 5   | 0%   | 10%  | 13%  | 16%  | A | P | P | P |   |
| b3127   | garP | 3271595 | 3272929 | - | 1334 | 54  | 0   | 2   | 2   | 2   | 0%   | 4%   | 4%   | 4%   | A | P | P | P | U |
| b3131   | agaR | 3275878 | 3276687 | - | 809  | 32  | 31  | 31  | 31  | 31  | 97%  | 97%  | 97%  | 97%  | P | P | P | P |   |
| b3146   | yraL | 3290497 | 3291357 | - | 860  | 34  | 30  | 30  | 30  | 30  | 88%  | 88%  | 88%  | 88%  | P | P | P | P | U |
| b3151   | yraQ | 3295120 | 3296160 | - | 1040 | 42  | 37  | 37  | 38  | 38  | 88%  | 88%  | 90%  | 90%  | P | P | P | P | U |
| b3152   | yraR | 3296233 | 3296868 | - | 635  | 25  | 12  | 14  | 24  | 24  | 48%  | 56%  | 96%  | 96%  | P | P | P | P | U |
| b3154   | yhbP | 3297494 | 3297937 | - | 443  | 18  | 10  | 10  | 10  | 10  | 56%  | 56%  | 56%  | 56%  | P | P | P | P | U |
| b3156   | yhbS | 3298277 | 3298780 | - | 503  | 20  | 20  | 20  | 20  | 20  | 100% | 100% | 100% | 100% | P | P | P | P | U |

|       |      |         |         |   |      |     |     |     |     |     |      |      |      |      |   |   |   |   |   |
|-------|------|---------|---------|---|------|-----|-----|-----|-----|-----|------|------|------|------|---|---|---|---|---|
| b3157 | yhbT | 3298774 | 3299298 | - | 524  | 21  | 21  | 21  | 21  | 21  | 100% | 100% | 100% | 100% | P | P | P | P | U |
| b3161 | mtr  | 3302595 | 3303839 | - | 1244 | 50  | 23  | 23  | 23  | 24  | 46%  | 46%  | 46%  | 48%  | P | P | P | P |   |
| b3162 | deaD | 3303993 | 3305882 | - | 1889 | 76  | 76  | 76  | 76  | 76  | 100% | 100% | 100% | 100% | P | P | P | P |   |
| b3163 | nlpI | 3306062 | 3306946 | - | 884  | 36  | 36  | 36  | 36  | 36  | 100% | 100% | 100% | 100% | P | P | P | P | U |
| b3164 | pnp  | 3307055 | 3309190 | - | 2135 | 85  | 85  | 85  | 85  | 85  | 100% | 100% | 100% | 100% | P | P | P | P |   |
| b3165 | rpsO | 3309437 | 3309706 | - | 269  | 11  | 11  | 11  | 11  | 11  | 100% | 100% | 100% | 100% | P | P | P | P |   |
| b3166 | truB | 3309855 | 3310799 | - | 944  | 38  | 38  | 38  | 38  | 38  | 100% | 100% | 100% | 100% | P | P | P | P |   |
| b3167 | rbfA | 3310799 | 3311200 | - | 401  | 16  | 16  | 16  | 16  | 16  | 100% | 100% | 100% | 100% | P | P | P | P |   |
| b3168 | infB | 3311364 | 3314036 | - | 2672 | 107 | 107 | 107 | 107 | 107 | 100% | 100% | 100% | 100% | P | P | P | P | U |
| b3169 | nusA | 3314061 | 3315548 | - | 1487 | 60  | 60  | 60  | 60  | 60  | 100% | 100% | 100% | 100% | P | P | P | P |   |
| b3170 | yhbC | 3315576 | 3316034 | - | 458  | 18  | 18  | 18  | 18  | 18  | 100% | 100% | 100% | 100% | P | P | P | P | U |
| b3171 | metY | 3316235 | 3316311 | - | 76   | 3   | 3   | 3   | 3   | 3   | 100% | 100% | 100% | 100% | P | P | P | P |   |
| b3173 | yhbX | 3318010 | 3319635 | - | 1625 | 65  | 0   | 0   | 4   | 5   | 0%   | 0%   | 6%   | 8%   | A | A | P | P | U |
| b3174 | leuU | 3320094 | 3320180 | - | 86   | 4   | 4   | 4   | 4   | 4   | 100% | 100% | 100% | 100% | P | P | P | P |   |
| b3175 | secG | 3320195 | 3320527 | - | 332  | 14  | 14  | 14  | 14  | 14  | 100% | 100% | 100% | 100% | P | P | P | P |   |
| b3176 | glmM | 3320755 | 3322092 | - | 1337 | 53  | 53  | 53  | 53  | 53  | 100% | 100% | 100% | 100% | P | P | P | P |   |
| b3177 | folP | 3322085 | 3322933 | - | 848  | 34  | 31  | 31  | 31  | 31  | 91%  | 91%  | 91%  | 91%  | P | P | P | P |   |
| b3178 | hflB | 3323023 | 3324957 | - | 1934 | 77  | 77  | 77  | 77  | 77  | 100% | 100% | 100% | 100% | P | P | P | P |   |
| b3179 | rrmJ | 3325057 | 3325686 | - | 629  | 25  | 25  | 25  | 25  | 25  | 100% | 100% | 100% | 100% | P | P | P | P |   |
| b3181 | greA | 3326261 | 3326737 | - | 476  | 19  | 19  | 19  | 19  | 19  | 100% | 100% | 100% | 100% | P | P | P | P |   |
| b3183 | obgE | 3328604 | 3329776 | - | 1172 | 47  | 47  | 47  | 47  | 47  | 100% | 100% | 100% | 100% | P | P | P | P |   |
| b3184 | yhbE | 3329792 | 3330757 | - | 965  | 39  | 37  | 37  | 37  | 37  | 95%  | 95%  | 95%  | 95%  | P | P | P | P | U |
| b3185 | rpmA | 3330884 | 3331141 | - | 257  | 10  | 10  | 10  | 10  | 10  | 100% | 100% | 100% | 100% | P | P | P | P |   |
| b3186 | rplU | 3331162 | 3331473 | - | 311  | 13  | 13  | 13  | 13  | 13  | 100% | 100% | 100% | 100% | P | P | P | P |   |
| b3189 | murA | 3333257 | 3334516 | - | 1259 | 50  | 50  | 50  | 50  | 50  | 100% | 100% | 100% | 100% | P | P | P | P |   |
| b3190 | yrbA | 3334571 | 3334825 | - | 254  | 11  | 11  | 11  | 11  | 11  | 100% | 100% | 100% | 100% | P | P | P | P | U |
| b3191 | yrbB | 3334985 | 3335278 | - | 293  | 12  | 12  | 12  | 12  | 12  | 100% | 100% | 100% | 100% | P | P | P | P | U |
| b3192 | yrbC | 3335278 | 3335913 | - | 635  | 25  | 25  | 25  | 25  | 25  | 100% | 100% | 100% | 100% | P | P | P | P | U |
| b3193 | yrbD | 3335932 | 3336483 | - | 551  | 22  | 22  | 22  | 22  | 22  | 100% | 100% | 100% | 100% | P | P | P | P | U |
| b3194 | yrbE | 3336488 | 3337270 | - | 782  | 31  | 31  | 31  | 31  | 31  | 100% | 100% | 100% | 100% | P | P | P | P | U |
| b3195 | yrbF | 3337278 | 3338087 | - | 809  | 32  | 32  | 32  | 32  | 32  | 100% | 100% | 100% | 100% | P | P | P | P | U |
| b3208 | mtgA | 3347103 | 3347831 | - | 728  | 29  | 20  | 20  | 20  | 20  | 69%  | 69%  | 69%  | 69%  | P | P | P | P |   |
| b3209 | elbB | 3347828 | 3348481 | - | 653  | 27  | 26  | 26  | 26  | 26  | 96%  | 96%  | 96%  | 96%  | P | P | P | P |   |
| b3210 | arcB | 3348711 | 3351047 | - | 2336 | 93  | 86  | 86  | 86  | 88  | 92%  | 92%  | 92%  | 95%  | P | P | P | P |   |
| b3211 | yhcC | 3351143 | 3352072 | - | 929  | 37  | 0   | 17  | 17  | 17  | 0%   | 46%  | 46%  | 46%  | A | P | P | P | U |
| b3218 | insH | 3363724 | 3364740 | - | 1016 | 41  | 41  | 41  | 41  | 41  | 100% | 100% | 100% | 100% | P | P | P | P |   |
| b3221 | yhcH | 3367036 | 3367500 | - | 464  | 18  | 9   | 12  | 12  | 14  | 50%  | 67%  | 67%  | 78%  | P | P | P | P | U |
| b3222 | nanK | 3367497 | 3368372 | - | 875  | 35  | 20  | 21  | 27  | 27  | 57%  | 60%  | 77%  | 77%  | P | P | P | P | U |
| b3223 | nanE | 3368369 | 3369058 | - | 689  | 27  | 2   | 3   | 14  | 14  | 7%   | 11%  | 52%  | 52%  | P | P | P | P | U |
| b3224 | nanT | 3369106 | 3370596 | - | 1490 | 60  | 3   | 4   | 53  | 53  | 5%   | 7%   | 88%  | 88%  | P | P | P | P |   |
| b3225 | nanA | 3370705 | 3371598 | - | 893  | 36  | 3   | 9   | 36  | 36  | 8%   | 25%  | 100% | 100% | P | P | P | P |   |
| b3226 | nanR | 3371720 | 3372511 | - | 791  | 32  | 29  | 29  | 29  | 29  | 91%  | 91%  | 91%  | 91%  | P | P | P | P |   |
| b3228 | sspB | 3374301 | 3374798 | - | 497  | 20  | 20  | 20  | 20  | 20  | 100% | 100% | 100% | 100% | P | P | P | P |   |
| b3229 | sspA | 3374804 | 3375442 | - | 638  | 26  | 26  | 26  | 26  | 26  | 100% | 100% | 100% | 100% | P | P | P | P |   |
| b3230 | rpsI | 3375837 | 3376229 | - | 392  | 15  | 15  | 15  | 15  | 15  | 100% | 100% | 100% | 100% | P | P | P | P |   |
| b3231 | rplM | 3376245 | 3376673 | - | 428  | 17  | 17  | 17  | 17  | 17  | 100% | 100% | 100% | 100% | P | P | P | P |   |

|       |      |         |         |   |      |     |     |     |     |     |      |      |      |      |   |   |   |   |   |
|-------|------|---------|---------|---|------|-----|-----|-----|-----|-----|------|------|------|------|---|---|---|---|---|
| b3232 | yhcM | 3376892 | 3378019 | - | 1127 | 45  | 45  | 45  | 45  | 45  | 100% | 100% | 100% | 100% | P | P | P | P | U |
| b3236 | mdh  | 3381352 | 3382290 | - | 938  | 38  | 38  | 38  | 38  | 38  | 100% | 100% | 100% | 100% | P | P | P | P |   |
| b3239 | yhcO | 3383879 | 3384151 | - | 272  | 10  | 7   | 8   | 9   | 10  | 70%  | 80%  | 90%  | 100% | P | P | P | P | U |
| b3240 | aaeB | 3384243 | 3386210 | - | 1967 | 79  | 0   | 1   | 3   | 3   | 0%   | 1%   | 4%   | 4%   | A | P | P | P |   |
| b3241 | aaeA | 3386216 | 3387148 | - | 932  | 37  | 0   | 6   | 7   | 7   | 0%   | 16%  | 19%  | 19%  | A | P | P | P |   |
| b3242 | aaeX | 3387156 | 3387359 | - | 203  | 8   | 0   | 3   | 3   | 3   | 0%   | 38%  | 38%  | 38%  | A | P | P | P |   |
| b3244 | tldD | 3388605 | 3390050 | - | 1445 | 57  | 57  | 57  | 57  | 57  | 100% | 100% | 100% | 100% | P | P | P | P | U |
| b4472 | yhdP | 3390480 | 3394280 | - | 3800 | 152 | 124 | 124 | 129 | 131 | 82%  | 82%  | 85%  | 86%  | P | P | P | P | U |
| b3247 | rng  | 3394348 | 3395817 | - | 1469 | 59  | 59  | 59  | 59  | 59  | 100% | 100% | 100% | 100% | P | P | P | P |   |
| b3248 | yhdE | 3395807 | 3396400 | - | 593  | 23  | 23  | 23  | 23  | 23  | 100% | 100% | 100% | 100% | P | P | P | P | U |
| b3249 | mreD | 3396409 | 3396897 | - | 488  | 19  | 19  | 19  | 19  | 19  | 100% | 100% | 100% | 100% | P | P | P | P |   |
| b3250 | mreC | 3396897 | 3398000 | - | 1103 | 44  | 44  | 44  | 44  | 44  | 100% | 100% | 100% | 100% | P | P | P | P |   |
| b3251 | mreB | 3398066 | 3399109 | - | 1043 | 42  | 42  | 42  | 42  | 42  | 100% | 100% | 100% | 100% | P | P | P | P |   |
| b3252 | csrD | 3399414 | 3401354 | - | 1940 | 78  | 50  | 52  | 52  | 52  | 64%  | 67%  | 67%  | 67%  | P | P | P | P | U |
| b3264 | envR | 3410825 | 3411487 | - | 662  | 27  | 0   | 0   | 0   | 0   | 0%   | 0%   | 0%   | 0%   | A | A | A | A |   |
| b3272 | rrfF | 3421445 | 3421564 | - | 119  | 5   | 5   | 5   | 5   | 5   | 100% | 100% | 100% | 100% | P | P | P | P |   |
| b3273 | thrV | 3421602 | 3421677 | - | 75   | 3   | 3   | 3   | 3   | 3   | 100% | 100% | 100% | 100% | P | P | P | P |   |
| b3274 | rrfD | 3421690 | 3421809 | - | 119  | 5   | 5   | 5   | 5   | 5   | 100% | 100% | 100% | 100% | P | P | P | P |   |
| b3275 | rrlD | 3421902 | 3424805 | - | 2903 | 116 | 116 | 116 | 116 | 116 | 100% | 100% | 100% | 100% | P | P | P | P |   |
| b3276 | alaU | 3424980 | 3425055 | - | 75   | 3   | 3   | 3   | 3   | 3   | 100% | 100% | 100% | 100% | P | P | P | P |   |
| b3277 | ileU | 3425098 | 3425174 | - | 76   | 3   | 3   | 3   | 3   | 3   | 100% | 100% | 100% | 100% | P | P | P | P |   |
| b3278 | rrsD | 3425243 | 3426784 | - | 1541 | 62  | 62  | 62  | 62  | 62  | 100% | 100% | 100% | 100% | P | P | P | P |   |
| b3280 | yrdB | 3427788 | 3428045 | - | 257  | 10  | 8   | 8   | 9   | 9   | 80%  | 80%  | 90%  | 90%  | P | P | P | P | U |
| b3281 | aroE | 3428042 | 3428860 | - | 818  | 33  | 32  | 32  | 32  | 32  | 97%  | 97%  | 97%  | 97%  | P | P | P | P |   |
| b3282 | rimN | 3428865 | 3429437 | - | 572  | 23  | 23  | 23  | 23  | 23  | 100% | 100% | 100% | 100% | P | P | P | P | U |
| b3283 | yrdD | 3429442 | 3429984 | - | 542  | 22  | 22  | 22  | 22  | 22  | 100% | 100% | 100% | 100% | P | P | P | P | U |
| b3284 | smg  | 3430013 | 3430486 | - | 473  | 19  | 19  | 19  | 19  | 19  | 100% | 100% | 100% | 100% | P | P | P | P | U |
| b4473 | smf  | 3430458 | 3431582 | - | 1124 | 45  | 26  | 30  | 35  | 35  | 58%  | 67%  | 78%  | 78%  | P | P | P | P | U |
| b4550 | yhdL | 3436453 | 3436671 | - | 218  | 9   | 6   | 7   | 8   | 8   | 67%  | 78%  | 89%  | 89%  | P | P | P | P | U |
| b3292 | zntR | 3436727 | 3437152 | - | 425  | 17  | 13  | 17  | 17  | 17  | 76%  | 100% | 100% | 100% | P | P | P | P |   |
| b3293 | yhdN | 3437163 | 3437531 | - | 368  | 14  | 14  | 14  | 14  | 14  | 100% | 100% | 100% | 100% | P | P | P | P | U |
| b3294 | rplQ | 3437638 | 3438021 | - | 383  | 15  | 15  | 15  | 15  | 15  | 100% | 100% | 100% | 100% | P | P | P | P |   |
| b3295 | rpoA | 3438062 | 3439051 | - | 989  | 40  | 40  | 40  | 40  | 40  | 100% | 100% | 100% | 100% | P | P | P | P |   |
| b3296 | rpsD | 3439077 | 3439697 | - | 620  | 25  | 25  | 25  | 25  | 25  | 100% | 100% | 100% | 100% | P | P | P | P |   |
| b3297 | rpsK | 3439731 | 3440120 | - | 389  | 15  | 15  | 15  | 15  | 15  | 100% | 100% | 100% | 100% | P | P | P | P |   |
| b3298 | rpsM | 3440137 | 3440493 | - | 356  | 14  | 14  | 14  | 14  | 14  | 100% | 100% | 100% | 100% | P | P | P | P |   |
| b3299 | rpmJ | 3440640 | 3440756 | - | 116  | 5   | 5   | 5   | 5   | 5   | 100% | 100% | 100% | 100% | P | P | P | P |   |
| b3300 | secY | 3440788 | 3442119 | - | 1331 | 53  | 53  | 53  | 53  | 53  | 100% | 100% | 100% | 100% | P | P | P | P |   |
| b3301 | rplO | 3442127 | 3442561 | - | 434  | 17  | 17  | 17  | 17  | 17  | 100% | 100% | 100% | 100% | P | P | P | P |   |
| b3302 | rpmD | 3442565 | 3442744 | - | 179  | 7   | 7   | 7   | 7   | 7   | 100% | 100% | 100% | 100% | P | P | P | P |   |
| b3303 | rpsE | 3442748 | 3443251 | - | 503  | 20  | 20  | 20  | 20  | 20  | 100% | 100% | 100% | 100% | P | P | P | P |   |
| b3304 | rplR | 3443266 | 3443619 | - | 353  | 14  | 14  | 14  | 14  | 14  | 100% | 100% | 100% | 100% | P | P | P | P |   |
| b3305 | rplF | 3443629 | 3444162 | - | 533  | 21  | 21  | 21  | 21  | 21  | 100% | 100% | 100% | 100% | P | P | P | P |   |
| b3306 | rpsH | 3444175 | 3444567 | - | 392  | 15  | 15  | 15  | 15  | 15  | 100% | 100% | 100% | 100% | P | P | P | P |   |
| b3307 | rpsN | 3444601 | 3444906 | - | 305  | 12  | 12  | 12  | 12  | 12  | 100% | 100% | 100% | 100% | P | P | P | P |   |
| b3308 | rplE | 3444921 | 3445460 | - | 539  | 22  | 22  | 22  | 22  | 22  | 100% | 100% | 100% | 100% | P | P | P | P |   |

|       |      |         |         |   |      |     |    |    |    |    |      |      |      |      |   |   |   |   |
|-------|------|---------|---------|---|------|-----|----|----|----|----|------|------|------|------|---|---|---|---|
| b3309 | rplX | 3445475 | 3445789 | - | 314  | 12  | 12 | 12 | 12 | 12 | 100% | 100% | 100% | 100% | P | P | P | P |
| b3310 | rplN | 3445800 | 3446171 | - | 371  | 14  | 14 | 14 | 14 | 14 | 100% | 100% | 100% | 100% | P | P | P | P |
| b3311 | rpsQ | 3446336 | 3446590 | - | 254  | 10  | 10 | 10 | 10 | 10 | 100% | 100% | 100% | 100% | P | P | P | P |
| b3312 | rpmC | 3446590 | 3446781 | - | 191  | 8   | 8  | 8  | 8  | 8  | 100% | 100% | 100% | 100% | P | P | P | P |
| b3313 | rplP | 3446781 | 3447191 | - | 410  | 16  | 16 | 16 | 16 | 16 | 100% | 100% | 100% | 100% | P | P | P | P |
| b3314 | rpsC | 3447204 | 3447905 | - | 701  | 28  | 28 | 28 | 28 | 28 | 100% | 100% | 100% | 100% | P | P | P | P |
| b3315 | rplV | 3447923 | 3448255 | - | 332  | 13  | 13 | 13 | 13 | 13 | 100% | 100% | 100% | 100% | P | P | P | P |
| b3316 | rpsS | 3448270 | 3448548 | - | 278  | 12  | 12 | 12 | 12 | 12 | 100% | 100% | 100% | 100% | P | P | P | P |
| b3317 | rplB | 3448565 | 3449386 | - | 821  | 33  | 33 | 33 | 33 | 33 | 100% | 100% | 100% | 100% | P | P | P | P |
| b3318 | rplW | 3449404 | 3449706 | - | 302  | 12  | 12 | 12 | 12 | 12 | 100% | 100% | 100% | 100% | P | P | P | P |
| b3319 | rplD | 3449703 | 3450308 | - | 605  | 24  | 24 | 24 | 24 | 24 | 100% | 100% | 100% | 100% | P | P | P | P |
| b3320 | rplC | 3450319 | 3450948 | - | 629  | 26  | 26 | 26 | 26 | 26 | 100% | 100% | 100% | 100% | P | P | P | P |
| b3321 | rpsJ | 3450981 | 3451292 | - | 311  | 12  | 12 | 12 | 12 | 12 | 100% | 100% | 100% | 100% | P | P | P | P |
| b3322 | gspB | 3451530 | 3451949 | - | 419  | 17  | 9  | 13 | 13 | 13 | 53%  | 76%  | 76%  | 76%  | P | P | P | P |
| b3323 | gspA | 3451951 | 3453420 | - | 1469 | 58  | 0  | 5  | 5  | 5  | 0%   | 9%   | 9%   | 9%   | A | P | P | P |
| b3336 | bfr  | 3464271 | 3464747 | - | 476  | 20  | 20 | 20 | 20 | 20 | 100% | 100% | 100% | 100% | P | P | P | P |
| b3337 | bfd  | 3464819 | 3465013 | - | 194  | 8   | 8  | 8  | 8  | 8  | 100% | 100% | 100% | 100% | P | P | P | P |
| b3338 | chiA | 3465182 | 3467875 | - | 2693 | 108 | 20 | 20 | 28 | 28 | 19%  | 19%  | 26%  | 26%  | P | P | P | P |
| b3339 | tufA | 3468167 | 3469351 | - | 1184 | 48  | 48 | 48 | 48 | 48 | 100% | 100% | 100% | 100% | P | P | P | P |
| b3340 | fusA | 3469422 | 3471536 | - | 2114 | 85  | 85 | 85 | 85 | 85 | 100% | 100% | 100% | 100% | P | P | P | P |
| b3341 | rpsG | 3471564 | 3472103 | - | 539  | 22  | 22 | 22 | 22 | 22 | 100% | 100% | 100% | 100% | P | P | P | P |
| b3342 | rpsL | 3472200 | 3472574 | - | 374  | 15  | 15 | 15 | 15 | 15 | 100% | 100% | 100% | 100% | P | P | P | P |
| b3343 | yheL | 3472700 | 3472987 | - | 287  | 11  | 11 | 11 | 11 | 11 | 100% | 100% | 100% | 100% | P | P | P | P |
| b3344 | yheM | 3472995 | 3473354 | - | 359  | 15  | 15 | 15 | 15 | 15 | 100% | 100% | 100% | 100% | P | P | P | P |
| b3345 | yheN | 3473354 | 3473740 | - | 386  | 15  | 15 | 15 | 15 | 15 | 100% | 100% | 100% | 100% | P | P | P | P |
| b3346 | yheO | 3473740 | 3474462 | - | 722  | 29  | 29 | 29 | 29 | 29 | 100% | 100% | 100% | 100% | P | P | P | P |
| b3347 | fkpA | 3474629 | 3475441 | - | 812  | 32  | 31 | 31 | 31 | 31 | 97%  | 97%  | 97%  | 97%  | P | P | P | P |
| b3349 | slyD | 3475929 | 3476519 | - | 590  | 23  | 23 | 23 | 23 | 23 | 100% | 100% | 100% | 100% | P | P | P | P |
| b4551 | yheV | 3476614 | 3476814 | - | 200  | 8   | 8  | 8  | 8  | 8  | 100% | 100% | 100% | 100% | P | P | P | P |
| b3350 | kefB | 3476824 | 3478629 | - | 1805 | 73  | 45 | 45 | 48 | 51 | 62%  | 62%  | 66%  | 70%  | P | P | P | P |
| b3351 | kefG | 3478629 | 3479183 | - | 554  | 22  | 20 | 20 | 20 | 20 | 91%  | 91%  | 91%  | 91%  | P | P | P | P |
| b3356 | yhfA | 3483436 | 3483840 | - | 404  | 16  | 16 | 16 | 16 | 16 | 100% | 100% | 100% | 100% | P | P | P | P |
| b3359 | argD | 3486982 | 3488202 | - | 1220 | 49  | 49 | 49 | 49 | 49 | 100% | 100% | 100% | 100% | P | P | P | P |
| b3360 | pabA | 3488288 | 3488851 | - | 563  | 23  | 23 | 23 | 23 | 23 | 100% | 100% | 100% | 100% | P | P | P | P |
| b3361 | fic  | 3488883 | 3489485 | - | 602  | 24  | 23 | 23 | 24 | 24 | 96%  | 96%  | 100% | 100% | P | P | P | P |
| b3362 | yhfG | 3489475 | 3489642 | - | 167  | 6   | 6  | 6  | 6  | 6  | 100% | 100% | 100% | 100% | P | P | P | P |
| b3363 | ppiA | 3489747 | 3490319 | - | 572  | 23  | 22 | 22 | 22 | 22 | 96%  | 96%  | 96%  | 96%  | P | P | P | P |
| b3376 | yhfS | 3502957 | 3504042 | - | 1085 | 44  | 0  | 1  | 5  | 5  | 0%   | 2%   | 11%  | 11%  | A | P | P | P |
| b3377 | yhfT | 3504054 | 3505358 | - | 1304 | 52  | 0  | 1  | 1  | 1  | 0%   | 2%   | 2%   | 2%   | A | P | P | P |
| b3378 | yhfU | 3505370 | 3505723 | - | 353  | 14  | 0  | 0  | 0  | 0  | 0%   | 0%   | 0%   | 0%   | A | A | A | A |
| b3379 | php  | 3505734 | 3506612 | - | 878  | 36  | 0  | 4  | 4  | 4  | 0%   | 11%  | 11%  | 11%  | A | P | P | P |
| b3380 | yhfW | 3506609 | 3507835 | - | 1226 | 49  | 0  | 7  | 7  | 7  | 0%   | 14%  | 14%  | 14%  | A | P | P | P |
| b3381 | yhfX | 3507835 | 3508998 | - | 1163 | 47  | 0  | 10 | 10 | 10 | 0%   | 21%  | 21%  | 21%  | A | P | P | P |
| b3382 | yhfY | 3509082 | 3509444 | - | 362  | 15  | 1  | 15 | 15 | 15 | 7%   | 100% | 100% | 100% | P | P | P | P |
| b3383 | yhfZ | 3509461 | 3510366 | - | 905  | 37  | 13 | 31 | 31 | 32 | 35%  | 84%  | 84%  | 86%  | P | P | P | P |
| b3384 | trpS | 3510656 | 3511660 | - | 1004 | 40  | 40 | 40 | 40 | 40 | 100% | 100% | 100% | 100% | P | P | P | P |

|       |      |         |         |   |      |    |    |    |    |    |      |      |      |      |   |   |   |   |   |
|-------|------|---------|---------|---|------|----|----|----|----|----|------|------|------|------|---|---|---|---|---|
| b3385 | gph  | 3511653 | 3512411 | - | 758  | 30 | 30 | 30 | 30 | 30 | 100% | 100% | 100% | 100% | P | P | P | P |   |
| b3386 | rpe  | 3512404 | 3513081 | - | 677  | 27 | 27 | 27 | 27 | 27 | 100% | 100% | 100% | 100% | P | P | P | P |   |
| b3387 | dam  | 3513099 | 3513935 | - | 836  | 33 | 33 | 33 | 33 | 33 | 100% | 100% | 100% | 100% | P | P | P | P |   |
| b3388 | damX | 3514042 | 3515328 | - | 1286 | 51 | 51 | 51 | 51 | 51 | 100% | 100% | 100% | 100% | P | P | P | P | U |
| b3389 | aroB | 3515420 | 3516508 | - | 1088 | 43 | 43 | 43 | 43 | 43 | 100% | 100% | 100% | 100% | P | P | P | P |   |
| b3390 | aroK | 3516565 | 3517086 | - | 521  | 20 | 20 | 20 | 20 | 20 | 100% | 100% | 100% | 100% | P | P | P | P |   |
| b3391 | hofQ | 3517487 | 3518725 | - | 1238 | 50 | 0  | 2  | 3  | 5  | 0%   | 4%   | 6%   | 10%  | A | P | P | P | U |
| b3392 | hofP | 3518637 | 3519041 | - | 404  | 17 | 0  | 0  | 0  | 0  | 0%   | 0%   | 0%   | 0%   | A | A | A | A | U |
| b3393 | hofO | 3519031 | 3519471 | - | 440  | 18 | 0  | 0  | 0  | 0  | 0%   | 0%   | 0%   | 0%   | A | A | A | A | U |
| b3394 | hofN | 3519455 | 3519994 | - | 539  | 22 | 0  | 0  | 0  | 0  | 0%   | 0%   | 0%   | 0%   | A | A | A | A | U |
| b3395 | hofM | 3519994 | 3520773 | - | 779  | 31 | 0  | 0  | 3  | 3  | 0%   | 0%   | 10%  | 10%  | A | A | P | P | U |
| b3397 | nudE | 3523611 | 3524171 | - | 560  | 23 | 22 | 22 | 22 | 22 | 96%  | 96%  | 96%  | 96%  | P | P | P | P |   |
| b3402 | yhgE | 3528737 | 3530461 | - | 1724 | 69 | 16 | 16 | 16 | 16 | 23%  | 23%  | 23%  | 23%  | P | P | P | P | U |
| b3404 | envZ | 3532538 | 3533890 | - | 1352 | 55 | 50 | 50 | 50 | 50 | 91%  | 91%  | 91%  | 91%  | P | P | P | P |   |
| b3405 | ompR | 3533887 | 3534606 | - | 719  | 29 | 29 | 29 | 29 | 29 | 100% | 100% | 100% | 100% | P | P | P | P |   |
| b3412 | bioH | 3542096 | 3542866 | - | 770  | 31 | 24 | 24 | 24 | 24 | 77%  | 77%  | 77%  | 77%  | P | P | P | P |   |
| b3416 | malQ | 3546008 | 3548092 | - | 2084 | 84 | 82 | 82 | 82 | 82 | 98%  | 98%  | 98%  | 98%  | P | P | P | P |   |
| b3417 | malP | 3548102 | 3550495 | - | 2393 | 96 | 95 | 95 | 95 | 96 | 99%  | 99%  | 99%  | 100% | P | P | P | P |   |
| b4475 | rtcA | 3553855 | 3554871 | - | 1016 | 41 | 6  | 9  | 26 | 26 | 15%  | 22%  | 63%  | 63%  | P | P | P | P |   |
| b3421 | rtcB | 3554875 | 3556101 | - | 1226 | 49 | 12 | 25 | 46 | 46 | 24%  | 51%  | 94%  | 94%  | P | P | P | P | U |
| b3423 | glpR | 3557870 | 3558628 | - | 758  | 30 | 30 | 30 | 30 | 30 | 100% | 100% | 100% | 100% | P | P | P | P |   |
| b3424 | glpG | 3558645 | 3559475 | - | 830  | 33 | 33 | 33 | 33 | 33 | 100% | 100% | 100% | 100% | P | P | P | P | U |
| b3425 | glpE | 3559520 | 3559846 | - | 326  | 13 | 13 | 13 | 13 | 13 | 100% | 100% | 100% | 100% | P | P | P | P |   |
| b3427 | yzgL | 3561747 | 3562028 | - | 281  | 11 | 5  | 5  | 5  | 6  | 45%  | 45%  | 45%  | 55%  | P | P | P | P | U |
| b3428 | glgP | 3562157 | 3564604 | - | 2447 | 98 | 95 | 95 | 95 | 96 | 97%  | 97%  | 97%  | 98%  | P | P | P | P |   |
| b3429 | glgA | 3564623 | 3566056 | - | 1433 | 57 | 57 | 57 | 57 | 57 | 100% | 100% | 100% | 100% | P | P | P | P |   |
| b3430 | glgC | 3566056 | 3567351 | - | 1295 | 52 | 52 | 52 | 52 | 52 | 100% | 100% | 100% | 100% | P | P | P | P |   |
| b3431 | glgX | 3567369 | 3569342 | - | 1973 | 79 | 78 | 78 | 78 | 78 | 99%  | 99%  | 99%  | 99%  | P | P | P | P |   |
| b3432 | glgB | 3569339 | 3571525 | - | 2186 | 88 | 88 | 88 | 88 | 88 | 100% | 100% | 100% | 100% | P | P | P | P |   |
| b3433 | asd  | 3571798 | 3572901 | - | 1103 | 44 | 44 | 44 | 44 | 44 | 100% | 100% | 100% | 100% | P | P | P | P |   |
| b4476 | gntU | 3573744 | 3575084 | - | 1340 | 54 | 0  | 8  | 8  | 8  | 0%   | 15%  | 15%  | 15%  | A | P | P | P |   |
| b3437 | gntK | 3575088 | 3575615 | - | 527  | 21 | 2  | 19 | 19 | 19 | 10%  | 90%  | 90%  | 90%  | P | P | P | P |   |
| b3438 | gntR | 3575754 | 3576749 | - | 995  | 40 | 40 | 40 | 40 | 40 | 100% | 100% | 100% | 100% | P | P | P | P |   |
| b3439 | yhhW | 3576973 | 3577668 | - | 695  | 27 | 18 | 18 | 18 | 20 | 67%  | 67%  | 67%  | 74%  | P | P | P | P | U |
| b3440 | yhhX | 3577791 | 3578828 | - | 1037 | 42 | 40 | 40 | 40 | 42 | 95%  | 95%  | 95%  | 100% | P | P | P | P | U |
| b4451 | ryhB | 3578950 | 3579039 | - | 89   | 3  | 2  | 2  | 2  | 3  | 67%  | 67%  | 67%  | 100% | P | P | P | P |   |
| b3447 | ggt  | 3583104 | 3584846 | - | 1742 | 70 | 58 | 58 | 58 | 59 | 83%  | 83%  | 83%  | 84%  | P | P | P | P |   |
| b3449 | ugpQ | 3585393 | 3586136 | - | 743  | 30 | 25 | 25 | 25 | 25 | 83%  | 83%  | 83%  | 83%  | P | P | P | P |   |
| b3450 | ugpC | 3586133 | 3587203 | - | 1070 | 43 | 40 | 40 | 40 | 40 | 93%  | 93%  | 93%  | 93%  | P | P | P | P |   |
| b3451 | ugpE | 3587205 | 3588050 | - | 845  | 34 | 12 | 12 | 12 | 12 | 35%  | 35%  | 35%  | 35%  | P | P | P | P |   |
| b3452 | ugpA | 3588047 | 3588934 | - | 887  | 35 | 8  | 8  | 8  | 8  | 23%  | 23%  | 23%  | 23%  | P | P | P | P |   |
| b3453 | ugpB | 3589032 | 3590348 | - | 1316 | 53 | 47 | 47 | 52 | 52 | 89%  | 89%  | 98%  | 98%  | P | P | P | P |   |
| b3454 | livF | 3590747 | 3591460 | - | 713  | 28 | 28 | 28 | 28 | 28 | 100% | 100% | 100% | 100% | P | P | P | P |   |
| b3455 | livG | 3591462 | 3592229 | - | 767  | 31 | 31 | 31 | 31 | 31 | 100% | 100% | 100% | 100% | P | P | P | P |   |
| b3456 | livM | 3592226 | 3593503 | - | 1277 | 51 | 51 | 51 | 51 | 51 | 100% | 100% | 100% | 100% | P | P | P | P |   |
| b3457 | livH | 3593500 | 3594426 | - | 926  | 37 | 37 | 37 | 37 | 37 | 100% | 100% | 100% | 100% | P | P | P | P |   |



|       |      |         |         |   |      |     |     |     |     |     |      |      |      |      |   |   |   |   |   |
|-------|------|---------|---------|---|------|-----|-----|-----|-----|-----|------|------|------|------|---|---|---|---|---|
| b3458 | livK | 3594474 | 3595583 | - | 1109 | 44  | 44  | 44  | 44  | 44  | 100% | 100% | 100% | 100% | P | P | P | P |   |
| b3460 | livJ | 3596578 | 3597681 | - | 1103 | 44  | 44  | 44  | 44  | 44  | 100% | 100% | 100% | 100% | P | P | P | P |   |
| b3461 | rpoH | 3597952 | 3598806 | - | 854  | 34  | 33  | 34  | 34  | 34  | 97%  | 100% | 100% | 100% | P | P | P | P |   |
| b3462 | ftsX | 3599051 | 3600109 | - | 1058 | 42  | 40  | 40  | 40  | 40  | 95%  | 95%  | 95%  | 95%  | P | P | P | P | U |
| b3463 | ftsE | 3600102 | 3600770 | - | 668  | 26  | 26  | 26  | 26  | 26  | 100% | 100% | 100% | 100% | P | P | P | P | U |
| b3464 | ftsY | 3600773 | 3602266 | - | 1493 | 60  | 60  | 60  | 60  | 60  | 100% | 100% | 100% | 100% | P | P | P | P | U |
| b3467 | yhhM | 3603274 | 3603633 | - | 359  | 15  | 15  | 15  | 15  | 15  | 100% | 100% | 100% | 100% | P | P | P | P | U |
| b3470 | sirA | 3606774 | 3607019 | - | 245  | 10  | 9   | 10  | 10  | 10  | 90%  | 100% | 100% | 100% | P | P | P | P | U |
| b3473 | yhhS | 3608539 | 3609756 | - | 1217 | 49  | 31  | 31  | 31  | 33  | 63%  | 63%  | 63%  | 67%  | P | P | P | P | U |
| b3485 | yhhJ | 3623702 | 3624829 | - | 1127 | 45  | 44  | 44  | 44  | 44  | 98%  | 98%  | 98%  | 98%  | P | P | P | P | U |
| b3486 | rbbA | 3624826 | 3627561 | - | 2735 | 109 | 108 | 108 | 108 | 108 | 99%  | 99%  | 99%  | 99%  | P | P | P | P | U |
| b3487 | yhiI | 3627558 | 3628625 | - | 1067 | 43  | 43  | 43  | 43  | 43  | 100% | 100% | 100% | 100% | P | P | P | P | U |
| b3488 | yhiJ | 3628991 | 3630613 | - | 1622 | 65  | 0   | 0   | 2   | 2   | 0%   | 0%   | 3%   | 3%   | A | A | P | P | U |
| b4660 | yhiL | 3630875 | 3632481 | - | 1606 | 64  | 0   | 0   | 0   | 0   | 0%   | 0%   | 0%   | 0%   | A | A | A | A | U |
| b3492 | yhiN | 3634231 | 3635433 | - | 1202 | 48  | 47  | 47  | 47  | 47  | 98%  | 98%  | 98%  | 98%  | P | P | P | P | U |
| b3494 | uspB | 3637408 | 3637743 | - | 335  | 13  | 13  | 13  | 13  | 13  | 100% | 100% | 100% | 100% | P | P | P | P | U |
| b3497 | yhiQ | 3640403 | 3641155 | - | 752  | 30  | 25  | 26  | 26  | 26  | 83%  | 87%  | 87%  | 87%  | P | P | P | P | U |
| b3498 | prlC | 3641163 | 3643205 | - | 2042 | 82  | 82  | 82  | 82  | 82  | 100% | 100% | 100% | 100% | P | P | P | P |   |
| b4613 | dinQ | 3645728 | 3645856 | - | 128  | 5   | 5   | 5   | 5   | 5   | 100% | 100% | 100% | 100% | P | P | P | P | U |
| b3505 | insH | 3650205 | 3651221 | - | 1016 | 41  | 41  | 41  | 41  | 41  | 100% | 100% | 100% | 100% | P | P | P | P |   |
| b3508 | yhiD | 3653278 | 3653925 | - | 647  | 26  | 14  | 14  | 15  | 25  | 54%  | 54%  | 58%  | 96%  | P | P | P | P | U |
| b3509 | hdeB | 3653989 | 3654315 | - | 326  | 13  | 13  | 13  | 13  | 13  | 100% | 100% | 100% | 100% | P | P | P | P |   |
| b3510 | hdeA | 3654431 | 3654763 | - | 332  | 14  | 14  | 14  | 14  | 14  | 100% | 100% | 100% | 100% | P | P | P | P |   |
| b3515 | gadW | 3661913 | 3662641 | - | 728  | 29  | 26  | 26  | 26  | 27  | 90%  | 90%  | 90%  | 93%  | P | P | P | P |   |
| b3516 | gadX | 3663009 | 3663833 | - | 824  | 33  | 33  | 33  | 33  | 33  | 100% | 100% | 100% | 100% | P | P | P | P |   |
| b3517 | gadA | 3664203 | 3665603 | - | 1400 | 56  | 56  | 56  | 56  | 56  | 100% | 100% | 100% | 100% | P | P | P | P |   |
| b3518 | yhjA | 3665814 | 3667211 | - | 1397 | 56  | 6   | 20  | 21  | 21  | 11%  | 36%  | 38%  | 38%  | P | P | P | P | U |
| b3520 | yhjB | 3669315 | 3669917 | - | 602  | 24  | 0   | 0   | 0   | 0   | 0%   | 0%   | 0%   | 0%   | A | A | A | A | U |
| b3524 | yhjG | 3674313 | 3676388 | - | 2075 | 83  | 44  | 55  | 75  | 78  | 53%  | 66%  | 90%  | 94%  | P | P | P | P | U |
| b3525 | yhjH | 3676443 | 3677210 | - | 767  | 30  | 0   | 4   | 4   | 4   | 0%   | 13%  | 13%  | 13%  | A | P | P | P |   |
| b3527 | yhjJ | 3678467 | 3679963 | - | 1496 | 59  | 57  | 57  | 57  | 57  | 97%  | 97%  | 97%  | 97%  | P | P | P | P | U |
| b3528 | dctA | 3680184 | 3681470 | - | 1286 | 52  | 52  | 52  | 52  | 52  | 100% | 100% | 100% | 100% | P | P | P | P |   |
| b3529 | yhjK | 3681653 | 3683608 | - | 1955 | 78  | 56  | 56  | 56  | 56  | 72%  | 72%  | 72%  | 72%  | P | P | P | P | U |
| b3530 | bcsC | 3683723 | 3687145 | - | 3422 | 137 | 60  | 60  | 63  | 63  | 44%  | 44%  | 46%  | 46%  | P | P | P | P |   |
| b3531 | bcsZ | 3687178 | 3688284 | - | 1106 | 44  | 0   | 0   | 3   | 3   | 0%   | 0%   | 7%   | 7%   | A | A | P | P |   |
| b3532 | bcsB | 3688291 | 3690630 | - | 2339 | 93  | 0   | 2   | 9   | 10  | 0%   | 2%   | 10%  | 11%  | A | P | P | P |   |
| b3533 | bcsA | 3690641 | 3693259 | - | 2618 | 104 | 0   | 0   | 2   | 2   | 0%   | 0%   | 2%   | 2%   | A | A | P | P |   |
| b3534 | yhjQ | 3693256 | 3694008 | - | 752  | 30  | 16  | 16  | 16  | 16  | 53%  | 53%  | 53%  | 53%  | P | P | P | P | U |
| b3535 | yhjR | 3694020 | 3694208 | - | 188  | 7   | 7   | 7   | 7   | 7   | 100% | 100% | 100% | 100% | P | P | P | P | U |
| b4453 | ldrD | 3698003 | 3698110 | - | 107  | 4   | 4   | 4   | 4   | 4   | 100% | 100% | 100% | 100% | P | P | P | P |   |
| b3540 | dppF | 3699887 | 3700891 | - | 1004 | 41  | 39  | 39  | 39  | 40  | 95%  | 95%  | 95%  | 98%  | P | P | P | P |   |
| b3541 | dppD | 3700888 | 3701871 | - | 983  | 40  | 40  | 40  | 40  | 40  | 100% | 100% | 100% | 100% | P | P | P | P |   |
| b3542 | dppC | 3701882 | 3702784 | - | 902  | 36  | 36  | 36  | 36  | 36  | 100% | 100% | 100% | 100% | P | P | P | P |   |
| b3543 | dppB | 3702794 | 3703813 | - | 1019 | 40  | 40  | 40  | 40  | 40  | 100% | 100% | 100% | 100% | P | P | P | P |   |
| b3544 | dppA | 3704121 | 3705728 | - | 1607 | 64  | 64  | 64  | 64  | 64  | 100% | 100% | 100% | 100% | P | P | P | P |   |
| b3545 | proK | 3706639 | 3706715 | - | 76   | 3   | 3   | 3   | 3   | 3   | 100% | 100% | 100% | 100% | P | P | P | P |   |

|       |      |         |         |   |      |    |    |    |    |    |      |      |      |      |   |   |   |   |   |
|-------|------|---------|---------|---|------|----|----|----|----|----|------|------|------|------|---|---|---|---|---|
| b3546 | eptB | 3706807 | 3708498 | - | 1691 | 68 | 16 | 16 | 16 | 17 | 24%  | 24%  | 24%  | 25%  | P | P | P | P | U |
| b3547 | yhjX | 3708822 | 3710030 | - | 1208 | 48 | 0  | 0  | 1  | 1  | 0%   | 0%   | 2%   | 2%   | A | A | P | P | U |
| b3548 | yhjY | 3710259 | 3710957 | - | 698  | 28 | 26 | 26 | 27 | 27 | 93%  | 93%  | 96%  | 96%  | P | P | P | P | U |
| b3551 | bisC | 3712084 | 3714417 | - | 2333 | 93 | 88 | 88 | 88 | 88 | 95%  | 95%  | 95%  | 95%  | P | P | P | P |   |
| b3554 | yiaF | 3716357 | 3717067 | - | 710  | 28 | 28 | 28 | 28 | 28 | 100% | 100% | 100% | 100% | P | P | P | P | U |
| b4455 | hokA | 3718471 | 3718623 | - | 152  | 6  | 0  | 0  | 0  | 0  | 0%   | 0%   | 0%   | 0%   | A | A | A | A |   |
| b4647 | mokA | 3718471 | 3718655 | - | 184  | 7  | 0  | 0  | 0  | 0  | 0%   | 0%   | 0%   | 0%   | A | A | A | A | U |
| b3559 | glyS | 3720351 | 3722420 | - | 2069 | 83 | 83 | 83 | 83 | 83 | 100% | 100% | 100% | 100% | P | P | P | P |   |
| b3560 | glyQ | 3722430 | 3723341 | - | 911  | 36 | 36 | 36 | 36 | 36 | 100% | 100% | 100% | 100% | P | P | P | P |   |
| b4553 | ysaB | 3723436 | 3723735 | - | 299  | 12 | 2  | 6  | 6  | 7  | 17%  | 50%  | 50%  | 58%  | P | P | P | P | U |
| b3562 | yiaA | 3724947 | 3725384 | - | 437  | 17 | 0  | 0  | 0  | 0  | 0%   | 0%   | 0%   | 0%   | A | A | A | A | U |
| b3563 | yiaB | 3725430 | 3725771 | - | 341  | 14 | 0  | 0  | 0  | 0  | 0%   | 0%   | 0%   | 0%   | A | A | A | A | U |
| b3564 | xylB | 3725940 | 3727394 | - | 1454 | 59 | 34 | 41 | 55 | 55 | 58%  | 69%  | 93%  | 93%  | P | P | P | P |   |
| b3565 | xylA | 3727466 | 3728788 | - | 1322 | 53 | 16 | 24 | 29 | 29 | 30%  | 45%  | 55%  | 55%  | P | P | P | P |   |
| b3570 | bax  | 3734376 | 3735200 | - | 824  | 32 | 32 | 32 | 32 | 32 | 100% | 100% | 100% | 100% | P | P | P | P | U |
| b3573 | ysaA | 3739132 | 3739605 | - | 473  | 19 | 0  | 6  | 6  | 6  | 0%   | 32%  | 32%  | 32%  | A | P | P | P | U |
| b3574 | yiaJ | 3739707 | 3740555 | - | 848  | 34 | 31 | 31 | 31 | 31 | 91%  | 91%  | 91%  | 91%  | P | P | P | P | U |
| b4648 | ysaC | 3748836 | 3748937 | - | 101  | 4  | 0  | 0  | 3  | 3  | 0%   | 0%   | 75%  | 75%  | A | A | P | P | U |
| b3584 | yiaT | 3749151 | 3749891 | - | 740  | 30 | 0  | 1  | 18 | 18 | 0%   | 3%   | 60%  | 60%  | A | P | P | P | U |
| b3586 | yiaV | 3750986 | 3752122 | - | 1136 | 45 | 0  | 0  | 4  | 4  | 0%   | 0%   | 9%   | 9%   | A | A | P | P |   |
| b3587 | yiaW | 3752128 | 3752451 | - | 323  | 13 | 0  | 0  | 0  | 0  | 0%   | 0%   | 0%   | 0%   | A | A | A | A | U |
| b3588 | aldB | 3752996 | 3754534 | - | 1538 | 62 | 13 | 17 | 60 | 60 | 21%  | 27%  | 97%  | 97%  | P | P | P | P |   |
| b3589 | yiaY | 3754699 | 3755850 | - | 1151 | 46 | 0  | 0  | 0  | 0  | 0%   | 0%   | 0%   | 0%   | A | A | A | A | U |
| b3590 | selB | 3756040 | 3757884 | - | 1844 | 74 | 67 | 67 | 67 | 67 | 91%  | 91%  | 91%  | 91%  | P | P | P | P |   |
| b3591 | selA | 3757881 | 3759272 | - | 1391 | 55 | 55 | 55 | 55 | 55 | 100% | 100% | 100% | 100% | P | P | P | P |   |
| b3592 | yibF | 3759370 | 3759978 | - | 608  | 25 | 25 | 25 | 25 | 25 | 100% | 100% | 100% | 100% | P | P | P | P | U |
| b3597 | yibH | 3768266 | 3769402 | - | 1136 | 46 | 5  | 8  | 25 | 26 | 11%  | 17%  | 54%  | 57%  | P | P | P | P | U |
| b3598 | yibI | 3769405 | 3769767 | - | 362  | 14 | 3  | 4  | 11 | 11 | 21%  | 29%  | 79%  | 79%  | P | P | P | P | U |
| b4554 | yibT | 3774194 | 3774403 | - | 209  | 9  | 9  | 9  | 9  | 9  | 100% | 100% | 100% | 100% | P | P | P | P | U |
| b3607 | cysE | 3779764 | 3780585 | - | 821  | 33 | 32 | 32 | 32 | 32 | 97%  | 97%  | 97%  | 97%  | P | P | P | P |   |
| b3608 | gpsA | 3780665 | 3781684 | - | 1019 | 41 | 41 | 41 | 41 | 41 | 100% | 100% | 100% | 100% | P | P | P | P |   |
| b3609 | secB | 3781684 | 3782151 | - | 467  | 18 | 18 | 18 | 18 | 18 | 100% | 100% | 100% | 100% | P | P | P | P |   |
| b3610 | grxC | 3782214 | 3782465 | - | 251  | 10 | 10 | 10 | 10 | 10 | 100% | 100% | 100% | 100% | P | P | P | P |   |
| b3611 | yibN | 3782607 | 3783038 | - | 431  | 17 | 17 | 17 | 17 | 17 | 100% | 100% | 100% | 100% | P | P | P | P | U |
| b3615 | yibD | 3787070 | 3788104 | - | 1034 | 42 | 0  | 0  | 0  | 0  | 0%   | 0%   | 0%   | 0%   | A | A | A | A | U |
| b3616 | tdh  | 3788343 | 3789368 | - | 1025 | 41 | 35 | 35 | 39 | 39 | 85%  | 85%  | 95%  | 95%  | P | P | P | P |   |
| b3617 | kbl  | 3789378 | 3790574 | - | 1196 | 47 | 41 | 44 | 45 | 45 | 87%  | 94%  | 96%  | 96%  | P | P | P | P |   |
| b3618 | htrL | 3790849 | 3791706 | - | 857  | 35 | 27 | 27 | 28 | 28 | 77%  | 77%  | 80%  | 80%  | P | P | P | P | U |
| b3623 | waaU | 3796262 | 3797335 | - | 1073 | 43 | 22 | 22 | 22 | 23 | 51%  | 51%  | 51%  | 53%  | P | P | P | P |   |
| b3624 | rfaZ | 3797368 | 3798219 | - | 851  | 34 | 15 | 15 | 15 | 17 | 44%  | 44%  | 44%  | 50%  | P | P | P | P |   |
| b3625 | rfaY | 3798290 | 3798988 | - | 698  | 28 | 22 | 22 | 22 | 24 | 79%  | 79%  | 79%  | 86%  | P | P | P | P |   |
| b3626 | rfaJ | 3799006 | 3800022 | - | 1016 | 40 | 27 | 27 | 27 | 32 | 68%  | 68%  | 68%  | 80%  | P | P | P | P |   |
| b3627 | rfaI | 3800062 | 3801081 | - | 1019 | 41 | 30 | 30 | 30 | 34 | 73%  | 73%  | 73%  | 83%  | P | P | P | P |   |
| b3628 | rfaB | 3801081 | 3802190 | - | 1109 | 44 | 35 | 35 | 35 | 37 | 80%  | 80%  | 80%  | 84%  | P | P | P | P |   |
| b3629 | rfaS | 3802204 | 3803139 | - | 935  | 38 | 17 | 17 | 17 | 19 | 45%  | 45%  | 45%  | 50%  | P | P | P | P |   |
| b3630 | rfaP | 3803176 | 3803973 | - | 797  | 32 | 30 | 30 | 30 | 30 | 94%  | 94%  | 94%  | 94%  | P | P | P | P |   |

|       |      |         |         |   |      |    |    |    |    |    |      |      |      |      |   |   |   |   |   |
|-------|------|---------|---------|---|------|----|----|----|----|----|------|------|------|------|---|---|---|---|---|
| b3631 | rfaG | 3803966 | 3805090 | - | 1124 | 45 | 44 | 44 | 44 | 44 | 98%  | 98%  | 98%  | 98%  | P | P | P | P |   |
| b3632 | rfaQ | 3805087 | 3806121 | - | 1034 | 41 | 39 | 39 | 39 | 39 | 95%  | 95%  | 95%  | 95%  | P | P | P | P |   |
| b3635 | mutM | 3808366 | 3809175 | - | 809  | 32 | 21 | 32 | 32 | 32 | 66%  | 100% | 100% | 100% | P | P | P | P |   |
| b3636 | rpmG | 3809273 | 3809440 | - | 167  | 7  | 7  | 7  | 7  | 7  | 100% | 100% | 100% | 100% | P | P | P | P |   |
| b3637 | rpmB | 3809461 | 3809697 | - | 236  | 9  | 9  | 9  | 9  | 9  | 100% | 100% | 100% | 100% | P | P | P | P |   |
| b3638 | yicR | 3809914 | 3810582 | - | 668  | 27 | 4  | 4  | 4  | 4  | 15%  | 15%  | 15%  | 15%  | P | P | P | P |   |
| b3642 | pyrE | 3813150 | 3813791 | - | 641  | 26 | 9  | 9  | 9  | 9  | 35%  | 35%  | 35%  | 35%  | P | P | P | P |   |
| b3643 | rph  | 3813886 | 3814572 | - | 686  | 27 | 27 | 27 | 27 | 27 | 100% | 100% | 100% | 100% | P | P | P | P |   |
| b3647 | ligB | 3817511 | 3819193 | - | 1682 | 67 | 0  | 0  | 0  | 0  | 0%   | 0%   | 0%   | 0%   | A | A | A | A |   |
| b3653 | gltS | 3825483 | 3826688 | - | 1205 | 48 | 38 | 45 | 45 | 45 | 79%  | 94%  | 94%  | 94%  | P | P | P | P |   |
| b3656 | yicI | 3830242 | 3832560 | - | 2318 | 93 | 0  | 3  | 5  | 5  | 0%   | 3%   | 5%   | 5%   | A | P | P | P | U |
| b3657 | yicJ | 3832570 | 3833952 | - | 1382 | 55 | 0  | 0  | 0  | 0  | 0%   | 0%   | 0%   | 0%   | A | A | A | A | U |
| b3661 | nlpA | 3837198 | 3838016 | - | 818  | 33 | 33 | 33 | 33 | 33 | 100% | 100% | 100% | 100% | P | P | P | P |   |
| b3662 | nepI | 3838572 | 3839762 | - | 1190 | 48 | 0  | 0  | 0  | 0  | 0%   | 0%   | 0%   | 0%   | A | A | A | A | U |
| b3663 | yicN | 3839973 | 3840425 | - | 452  | 18 | 0  | 1  | 2  | 2  | 0%   | 6%   | 11%  | 11%  | A | P | P | P | U |
| b3664 | yicO | 3840478 | 3841812 | - | 1334 | 54 | 0  | 0  | 5  | 5  | 0%   | 0%   | 9%   | 9%   | A | A | P | P | U |
| b3666 | uhpT | 3843799 | 3845190 | - | 1391 | 56 | 0  | 7  | 7  | 7  | 0%   | 13%  | 13%  | 13%  | A | P | P | P |   |
| b3667 | uhpC | 3845328 | 3846647 | - | 1319 | 53 | 18 | 26 | 26 | 26 | 34%  | 49%  | 49%  | 49%  | P | P | P | P |   |
| b3668 | uhpB | 3846657 | 3848159 | - | 1502 | 60 | 29 | 29 | 29 | 29 | 48%  | 48%  | 48%  | 48%  | P | P | P | P |   |
| b3669 | uhpA | 3848159 | 3848749 | - | 590  | 23 | 22 | 22 | 22 | 22 | 96%  | 96%  | 96%  | 96%  | P | P | P | P |   |
| b3670 | ilvN | 3848825 | 3849115 | - | 290  | 12 | 12 | 12 | 12 | 12 | 100% | 100% | 100% | 100% | P | P | P | P |   |
| b3671 | ilvB | 3849119 | 3850807 | - | 1688 | 68 | 68 | 68 | 68 | 68 | 100% | 100% | 100% | 100% | P | P | P | P |   |
| b3672 | ivbL | 3850913 | 3851011 | - | 98   | 4  | 4  | 4  | 4  | 4  | 100% | 100% | 100% | 100% | P | P | P | P |   |
| b4616 | istR | 3851141 | 3851280 | - | 139  | 5  | 0  | 0  | 0  | 0  | 0%   | 0%   | 0%   | 0%   | A | A | A | A |   |
| b3674 | yidF | 3853137 | 3853634 | - | 497  | 20 | 1  | 1  | 2  | 2  | 5%   | 5%   | 10%  | 10%  | P | P | P | P | U |
| b3675 | yidG | 3853631 | 3853993 | - | 362  | 15 | 5  | 5  | 6  | 8  | 33%  | 33%  | 40%  | 53%  | P | P | P | P | U |
| b3676 | yidH | 3853983 | 3854330 | - | 347  | 14 | 12 | 13 | 13 | 13 | 86%  | 93%  | 93%  | 93%  | P | P | P | P | U |
| b3678 | yidJ | 3854934 | 3856427 | - | 1493 | 59 | 0  | 2  | 6  | 6  | 0%   | 3%   | 10%  | 10%  | A | P | P | P | U |
| b3679 | yidK | 3856424 | 3858139 | - | 1715 | 69 | 0  | 1  | 1  | 1  | 0%   | 1%   | 1%   | 1%   | A | P | P | P | U |
| b4556 | glvG | 3859196 | 3860010 | - | 814  | 33 | 0  | 0  | 0  | 0  | 0%   | 0%   | 0%   | 0%   | A | A | A | A | U |
| b3683 | glvC | 3860010 | 3861626 | - | 1616 | 64 | 0  | 0  | 0  | 0  | 0%   | 0%   | 0%   | 0%   | A | A | A | A | U |
| b3685 | yidE | 3862635 | 3864296 | - | 1661 | 66 | 50 | 51 | 51 | 51 | 76%  | 77%  | 77%  | 77%  | P | P | P | P | U |
| b3686 | ibpB | 3864492 | 3864920 | - | 428  | 17 | 11 | 17 | 17 | 17 | 65%  | 100% | 100% | 100% | P | P | P | P |   |
| b3687 | ibpA | 3865032 | 3865445 | - | 413  | 17 | 17 | 17 | 17 | 17 | 100% | 100% | 100% | 100% | P | P | P | P |   |
| b3689 | yidR | 3866085 | 3867299 | - | 1214 | 48 | 29 | 29 | 29 | 29 | 60%  | 60%  | 60%  | 60%  | P | P | P | P | U |
| b3691 | dgoT | 3868461 | 3869753 | - | 1292 | 51 | 0  | 0  | 0  | 0  | 0%   | 0%   | 0%   | 0%   | A | A | A | A |   |
| b4478 | dgoD | 3869873 | 3871021 | - | 1148 | 46 | 0  | 4  | 6  | 6  | 0%   | 9%   | 13%  | 13%  | A | P | P | P |   |
| b4477 | dgoA | 3871018 | 3871635 | - | 617  | 25 | 0  | 1  | 2  | 2  | 0%   | 4%   | 8%   | 8%   | A | P | P | P |   |
| b3693 | dgoK | 3871619 | 3872497 | - | 878  | 35 | 0  | 2  | 8  | 8  | 0%   | 6%   | 23%  | 23%  | A | P | P | P |   |
| b4479 | dgoR | 3872494 | 3873183 | - | 689  | 27 | 24 | 24 | 25 | 25 | 89%  | 89%  | 93%  | 93%  | P | P | P | P | U |
| b3697 | yidA | 3874163 | 3874975 | - | 812  | 33 | 32 | 32 | 32 | 32 | 97%  | 97%  | 97%  | 97%  | P | P | P | P | U |
| b3698 | yidB | 3875090 | 3875488 | - | 398  | 16 | 14 | 14 | 14 | 15 | 88%  | 88%  | 88%  | 94%  | P | P | P | P | U |
| b3699 | gyrB | 3875728 | 3878142 | - | 2414 | 96 | 96 | 96 | 96 | 96 | 100% | 100% | 100% | 100% | P | P | P | P |   |
| b3700 | recF | 3878171 | 3879244 | - | 1073 | 42 | 39 | 42 | 42 | 42 | 93%  | 100% | 100% | 100% | P | P | P | P |   |
| b3701 | dnaN | 3879244 | 3880344 | - | 1100 | 44 | 44 | 44 | 44 | 44 | 100% | 100% | 100% | 100% | P | P | P | P |   |
| b3702 | dnaA | 3880349 | 3881752 | - | 1403 | 56 | 56 | 56 | 56 | 56 | 100% | 100% | 100% | 100% | P | P | P | P |   |

|       |      |         |         |   |      |    |    |    |    |    |      |      |      |      |   |   |   |   |   |
|-------|------|---------|---------|---|------|----|----|----|----|----|------|------|------|------|---|---|---|---|---|
| b3714 | yieG | 3893295 | 3894632 | - | 1337 | 54 | 54 | 54 | 54 | 54 | 100% | 100% | 100% | 100% | P | P | P | P | U |
| b3718 | yieK | 3896694 | 3897416 | - | 722  | 29 | 0  | 5  | 8  | 8  | 0%   | 17%  | 28%  | 28%  | A | P | P | P | U |
| b3719 | yieL | 3897431 | 3898600 | - | 1169 | 47 | 0  | 1  | 1  | 1  | 0%   | 2%   | 2%   | 2%   | A | P | P | P | U |
| b3720 | bglH | 3898627 | 3900243 | - | 1616 | 64 | 0  | 0  | 0  | 0  | 0%   | 0%   | 0%   | 0%   | A | A | A | A |   |
| b3721 | bglB | 3900312 | 3901724 | - | 1412 | 57 | 0  | 0  | 0  | 0  | 0%   | 0%   | 0%   | 0%   | A | A | A | A |   |
| b3722 | bglF | 3901743 | 3903620 | - | 1877 | 75 | 0  | 0  | 0  | 0  | 0%   | 0%   | 0%   | 0%   | A | A | A | A |   |
| b3723 | bglG | 3903754 | 3904590 | - | 836  | 33 | 0  | 0  | 0  | 0  | 0%   | 0%   | 0%   | 0%   | A | A | A | A |   |
| b3724 | phoU | 3904876 | 3905601 | - | 725  | 29 | 29 | 29 | 29 | 29 | 100% | 100% | 100% | 100% | P | P | P | P |   |
| b3725 | pstB | 3905616 | 3906389 | - | 773  | 31 | 31 | 31 | 31 | 31 | 100% | 100% | 100% | 100% | P | P | P | P |   |
| b3726 | pstA | 3906572 | 3907462 | - | 890  | 36 | 35 | 35 | 35 | 35 | 97%  | 97%  | 97%  | 97%  | P | P | P | P |   |
| b3727 | pstC | 3907462 | 3908421 | - | 959  | 38 | 38 | 38 | 38 | 38 | 100% | 100% | 100% | 100% | P | P | P | P |   |
| b3728 | pstS | 3908508 | 3909548 | - | 1040 | 41 | 41 | 41 | 41 | 41 | 100% | 100% | 100% | 100% | P | P | P | P |   |
| b3729 | glmS | 3909862 | 3911691 | - | 1829 | 73 | 73 | 73 | 73 | 73 | 100% | 100% | 100% | 100% | P | P | P | P |   |
| b3730 | glmU | 3911853 | 3913223 | - | 1370 | 55 | 55 | 55 | 55 | 55 | 100% | 100% | 100% | 100% | P | P | P | P |   |
| b3731 | atpC | 3913576 | 3913995 | - | 419  | 17 | 17 | 17 | 17 | 17 | 100% | 100% | 100% | 100% | P | P | P | P |   |
| b3732 | atpD | 3914016 | 3915398 | - | 1382 | 55 | 55 | 55 | 55 | 55 | 100% | 100% | 100% | 100% | P | P | P | P |   |
| b3733 | atpG | 3915425 | 3916288 | - | 863  | 35 | 35 | 35 | 35 | 35 | 100% | 100% | 100% | 100% | P | P | P | P |   |
| b3734 | atpA | 3916339 | 3917880 | - | 1541 | 61 | 61 | 61 | 61 | 61 | 100% | 100% | 100% | 100% | P | P | P | P |   |
| b3735 | atpH | 3917893 | 3918426 | - | 533  | 21 | 21 | 21 | 21 | 21 | 100% | 100% | 100% | 100% | P | P | P | P |   |
| b3736 | atpF | 3918441 | 3918911 | - | 470  | 19 | 19 | 19 | 19 | 19 | 100% | 100% | 100% | 100% | P | P | P | P |   |
| b3737 | atpE | 3918973 | 3919212 | - | 239  | 10 | 10 | 10 | 10 | 10 | 100% | 100% | 100% | 100% | P | P | P | P |   |
| b3738 | atpB | 3919259 | 3920074 | - | 815  | 32 | 32 | 32 | 32 | 32 | 100% | 100% | 100% | 100% | P | P | P | P |   |
| b3739 | atpI | 3920083 | 3920463 | - | 380  | 15 | 15 | 15 | 15 | 15 | 100% | 100% | 100% | 100% | P | P | P | P |   |
| b3740 | gidB | 3921080 | 3921703 | - | 623  | 25 | 20 | 20 | 20 | 20 | 80%  | 80%  | 80%  | 80%  | P | P | P | P |   |
| b3741 | mnmG | 3921767 | 3923656 | - | 1889 | 75 | 74 | 74 | 74 | 74 | 99%  | 99%  | 99%  | 99%  | P | P | P | P |   |
| b3742 | mioC | 3924035 | 3924478 | - | 443  | 17 | 17 | 17 | 17 | 17 | 100% | 100% | 100% | 100% | P | P | P | P |   |
| b3743 | asnC | 3924568 | 3925026 | - | 458  | 18 | 11 | 11 | 11 | 11 | 61%  | 61%  | 61%  | 61%  | P | P | P | P |   |
| b3745 | viaA | 3926175 | 3927626 | - | 1451 | 58 | 44 | 44 | 44 | 47 | 76%  | 76%  | 76%  | 81%  | P | P | P | P | U |
| b3746 | ravA | 3927620 | 3929116 | - | 1496 | 60 | 57 | 57 | 57 | 59 | 95%  | 95%  | 95%  | 98%  | P | P | P | P | U |
| b3754 | hsrA | 3937208 | 3938635 | - | 1427 | 57 | 4  | 5  | 8  | 8  | 7%   | 9%   | 14%  | 14%  | P | P | P | P | U |
| b3755 | yieP | 3938658 | 3939350 | - | 692  | 27 | 27 | 27 | 27 | 27 | 100% | 100% | 100% | 100% | P | P | P | P | U |
| b4480 | hdfR | 3945151 | 3945990 | - | 839  | 34 | 23 | 30 | 30 | 30 | 68%  | 88%  | 88%  | 88%  | P | P | P | P |   |
| b3765 | yifB | 3946472 | 3947992 | - | 1520 | 61 | 0  | 0  | 0  | 0  | 0%   | 0%   | 0%   | 0%   | A | A | A | A | U |
| b3773 | ilvY | 3954950 | 3955843 | - | 893  | 36 | 29 | 32 | 32 | 32 | 81%  | 89%  | 89%  | 89%  | P | P | P | P |   |
| b3775 | ppiC | 3957555 | 3957836 | - | 281  | 12 | 11 | 11 | 11 | 11 | 92%  | 92%  | 92%  | 92%  | P | P | P | P |   |
| b3777 | yifN | 3958035 | 3958483 | - | 448  | 18 | 9  | 11 | 15 | 16 | 50%  | 61%  | 83%  | 89%  | P | P | P | P | U |
| b3779 | gpp  | 3960768 | 3962252 | - | 1484 | 59 | 53 | 53 | 53 | 53 | 90%  | 90%  | 90%  | 90%  | P | P | P | P |   |
| b3780 | rhlB | 3962388 | 3963653 | - | 1265 | 50 | 50 | 50 | 50 | 50 | 100% | 100% | 100% | 100% | P | P | P | P |   |
| b3801 | aslA | 3982375 | 3984030 | - | 1655 | 66 | 0  | 5  | 7  | 7  | 0%   | 8%   | 11%  | 11%  | A | P | P | P |   |
| b3802 | hemY | 3984709 | 3985905 | - | 1196 | 48 | 46 | 46 | 46 | 46 | 96%  | 96%  | 96%  | 96%  | P | P | P | P | U |
| b3803 | hemX | 3985908 | 3987089 | - | 1181 | 48 | 48 | 48 | 48 | 48 | 100% | 100% | 100% | 100% | P | P | P | P | U |
| b3804 | hemD | 3987111 | 3987851 | - | 740  | 30 | 30 | 30 | 30 | 30 | 100% | 100% | 100% | 100% | P | P | P | P |   |
| b3805 | hemC | 3987848 | 3988789 | - | 941  | 38 | 38 | 38 | 38 | 38 | 100% | 100% | 100% | 100% | P | P | P | P |   |
| b3807 | cyaY | 3991762 | 3992082 | - | 320  | 13 | 13 | 13 | 13 | 13 | 100% | 100% | 100% | 100% | P | P | P | P |   |
| b4482 | yigE | 3998315 | 3999079 | - | 764  | 31 | 0  | 0  | 0  | 0  | 0%   | 0%   | 0%   | 0%   | A | A | A | A | U |
| b3817 | yigF | 4000442 | 4000822 | - | 380  | 15 | 0  | 0  | 0  | 0  | 0%   | 0%   | 0%   | 0%   | A | A | A | A | U |

|       |      |         |         |   |      |     |     |     |     |     |      |      |      |      |   |   |   |   |   |
|-------|------|---------|---------|---|------|-----|-----|-----|-----|-----|------|------|------|------|---|---|---|---|---|
| b3818 | yigG | 4000836 | 4001216 | - | 380  | 16  | 0   | 0   | 0   | 0   | 0%   | 0%   | 0%   | 0%   | A | A | A | A | U |
| b3819 | rarD | 4001311 | 4002201 | - | 890  | 36  | 17  | 17  | 18  | 18  | 47%  | 47%  | 50%  | 50%  | P | P | P | P | U |
| b3820 | yigI | 4002253 | 4002720 | - | 467  | 19  | 19  | 19  | 19  | 19  | 100% | 100% | 100% | 100% | P | P | P | P | U |
| b3824 | rhtB | 4006462 | 4007082 | - | 620  | 25  | 24  | 24  | 24  | 25  | 96%  | 96%  | 96%  | 100% | P | P | P | P |   |
| b3828 | metR | 4009886 | 4010839 | - | 953  | 38  | 37  | 38  | 38  | 38  | 97%  | 100% | 100% | 100% | P | P | P | P |   |
| b3830 | ysgA | 4013377 | 4014192 | - | 815  | 33  | 33  | 33  | 33  | 33  | 100% | 100% | 100% | 100% | P | P | P | P | U |
| b3842 | rfaH | 4022356 | 4022844 | - | 488  | 20  | 15  | 15  | 15  | 15  | 75%  | 75%  | 75%  | 75%  | P | P | P | P |   |
| b3845 | fadA | 4025632 | 4026795 | - | 1163 | 47  | 15  | 15  | 28  | 28  | 32%  | 32%  | 60%  | 60%  | P | P | P | P |   |
| b3846 | fadB | 4026805 | 4028994 | - | 2189 | 88  | 75  | 75  | 87  | 87  | 85%  | 85%  | 99%  | 99%  | P | P | P | P |   |
| b3856 | mobB | 4038929 | 4039456 | - | 527  | 21  | 17  | 17  | 17  | 17  | 81%  | 81%  | 81%  | 81%  | P | P | P | P |   |
| b3857 | mobA | 4039438 | 4040022 | - | 584  | 24  | 24  | 24  | 24  | 24  | 100% | 100% | 100% | 100% | P | P | P | P |   |
| b3862 | yihG | 4043693 | 4044625 | - | 932  | 37  | 15  | 15  | 15  | 16  | 41%  | 41%  | 41%  | 43%  | P | P | P | P | U |
| b3865 | yihA | 4048156 | 4048788 | - | 632  | 26  | 25  | 25  | 25  | 25  | 96%  | 96%  | 96%  | 96%  | P | P | P | P |   |
| b3868 | glnG | 4051892 | 4053301 | - | 1409 | 56  | 54  | 54  | 54  | 56  | 96%  | 96%  | 96%  | 100% | P | P | P | P |   |
| b3869 | glnL | 4053313 | 4054362 | - | 1049 | 42  | 42  | 42  | 42  | 42  | 100% | 100% | 100% | 100% | P | P | P | P |   |
| b3870 | glnA | 4054648 | 4056057 | - | 1409 | 57  | 57  | 57  | 57  | 57  | 100% | 100% | 100% | 100% | P | P | P | P |   |
| b3875 | ompL | 4061626 | 4062318 | - | 692  | 28  | 0   | 0   | 0   | 0   | 0%   | 0%   | 0%   | 0%   | A | A | A | A | U |
| b3876 | yihO | 4062386 | 4063789 | - | 1403 | 56  | 0   | 2   | 4   | 4   | 0%   | 4%   | 7%   | 7%   | A | P | P | P | U |
| b3877 | yihP | 4063832 | 4065217 | - | 1385 | 55  | 0   | 0   | 0   | 0   | 0%   | 0%   | 0%   | 0%   | A | A | A | A | U |
| b3878 | yihQ | 4065263 | 4067299 | - | 2036 | 81  | 0   | 0   | 0   | 0   | 0%   | 0%   | 0%   | 0%   | A | A | A | A |   |
| b3879 | yihR | 4067498 | 4068424 | - | 926  | 37  | 0   | 0   | 0   | 0   | 0%   | 0%   | 0%   | 0%   | A | A | A | A | U |
| b3880 | yihS | 4068538 | 4069779 | - | 1241 | 49  | 0   | 5   | 7   | 7   | 0%   | 10%  | 14%  | 14%  | A | P | P | P | U |
| b3881 | yihT | 4069796 | 4070674 | - | 878  | 35  | 0   | 1   | 4   | 4   | 0%   | 3%   | 11%  | 11%  | A | P | P | P | U |
| b3882 | yihU | 4070698 | 4071594 | - | 896  | 36  | 0   | 0   | 0   | 0   | 0%   | 0%   | 0%   | 0%   | A | A | A | A | U |
| b3891 | fdhE | 4078322 | 4079251 | - | 929  | 37  | 31  | 31  | 31  | 31  | 84%  | 84%  | 84%  | 84%  | P | P | P | P |   |
| b3892 | fdoI | 4079248 | 4079883 | - | 635  | 26  | 18  | 18  | 18  | 18  | 69%  | 69%  | 69%  | 69%  | P | P | P | P |   |
| b3893 | fdoH | 4079880 | 4080782 | - | 902  | 36  | 28  | 28  | 28  | 28  | 78%  | 78%  | 78%  | 78%  | P | P | P | P |   |
| b3894 | fdoG | 4080795 | 4083845 | - | 3050 | 122 | 117 | 117 | 117 | 117 | 96%  | 96%  | 96%  | 96%  | P | P | P | P |   |
| b3897 | frvR | 4086130 | 4087878 | - | 1748 | 70  | 0   | 0   | 0   | 0   | 0%   | 0%   | 0%   | 0%   | A | A | A | A | U |
| b3898 | frvX | 4087878 | 4088948 | - | 1070 | 43  | 0   | 0   | 0   | 0   | 0%   | 0%   | 0%   | 0%   | A | A | A | A | U |
| b3899 | frvB | 4088938 | 4090389 | - | 1451 | 58  | 0   | 0   | 0   | 0   | 0%   | 0%   | 0%   | 0%   | A | A | A | A | U |
| b3900 | frvA | 4090400 | 4090846 | - | 446  | 18  | 0   | 0   | 0   | 0   | 0%   | 0%   | 0%   | 0%   | A | A | A | A | U |
| b3901 | rhaM | 4091147 | 4091461 | - | 314  | 13  | 0   | 0   | 0   | 0   | 0%   | 0%   | 0%   | 0%   | A | A | A | A |   |
| b3902 | rhaD | 4091471 | 4092295 | - | 824  | 33  | 0   | 0   | 0   | 0   | 0%   | 0%   | 0%   | 0%   | A | A | A | A |   |
| b3903 | rhaA | 4092746 | 4094005 | - | 1259 | 50  | 0   | 0   | 0   | 0   | 0%   | 0%   | 0%   | 0%   | A | A | A | A |   |
| b3904 | rhaB | 4094002 | 4095471 | - | 1469 | 59  | 0   | 0   | 0   | 0   | 0%   | 0%   | 0%   | 0%   | A | A | A | A |   |
| b3907 | rhaT | 4097514 | 4098548 | - | 1034 | 42  | 0   | 0   | 26  | 26  | 0%   | 0%   | 62%  | 62%  | A | A | P | P |   |
| b3911 | cpxA | 4101625 | 4102998 | - | 1373 | 55  | 55  | 55  | 55  | 55  | 100% | 100% | 100% | 100% | P | P | P | P |   |
| b3912 | cpxR | 4102995 | 4103693 | - | 698  | 28  | 28  | 28  | 28  | 28  | 100% | 100% | 100% | 100% | P | P | P | P |   |
| b3919 | tpiA | 4108763 | 4109530 | - | 767  | 31  | 29  | 29  | 29  | 30  | 94%  | 94%  | 94%  | 97%  | P | P | P | P |   |
| b3920 | yiiQ | 4109638 | 4110237 | - | 599  | 24  | 23  | 23  | 23  | 23  | 96%  | 96%  | 96%  | 96%  | P | P | P | P | U |
| b3924 | fpr  | 4111749 | 4112495 | - | 746  | 29  | 29  | 29  | 29  | 29  | 100% | 100% | 100% | 100% | P | P | P | P |   |
| b3925 | glpX | 4112592 | 4113602 | - | 1010 | 41  | 39  | 39  | 39  | 39  | 95%  | 95%  | 95%  | 95%  | P | P | P | P |   |
| b3926 | glpK | 4113737 | 4115245 | - | 1508 | 60  | 28  | 30  | 30  | 30  | 47%  | 50%  | 50%  | 50%  | P | P | P | P |   |
| b3927 | glpF | 4115268 | 4116113 | - | 845  | 34  | 1   | 6   | 8   | 10  | 3%   | 18%  | 24%  | 29%  | P | P | P | P |   |
| b3929 | rraA | 4116868 | 4117353 | - | 485  | 20  | 18  | 19  | 19  | 19  | 90%  | 95%  | 95%  | 95%  | P | P | P | P |   |

|         |      |         |         |   |      |     |     |     |     |     |      |      |      |      |   |   |   |   |   |
|---------|------|---------|---------|---|------|-----|-----|-----|-----|-----|------|------|------|------|---|---|---|---|---|
| b3930   | menA | 4117446 | 4118372 | - | 926  | 37  | 37  | 37  | 37  | 37  | 100% | 100% | 100% | 100% | P | P | P | P |   |
| b3931   | hslU | 4118439 | 4119770 | - | 1331 | 53  | 52  | 53  | 53  | 53  | 98%  | 100% | 100% | 100% | P | P | P | P |   |
| b3932   | hslV | 4119780 | 4120310 | - | 530  | 21  | 21  | 21  | 21  | 21  | 100% | 100% | 100% | 100% | P | P | P | P |   |
| b3933   | ftsN | 4120403 | 4121362 | - | 959  | 38  | 35  | 35  | 35  | 35  | 92%  | 92%  | 92%  | 92%  | P | P | P | P |   |
| b3934   | cytR | 4121454 | 4122479 | - | 1025 | 41  | 41  | 41  | 41  | 41  | 100% | 100% | 100% | 100% | P | P | P | P |   |
| b3935   | priA | 4122635 | 4124833 | - | 2198 | 88  | 66  | 66  | 66  | 66  | 75%  | 75%  | 75%  | 75%  | P | P | P | P |   |
| b3937   | yiiX | 4125309 | 4125917 | - | 608  | 24  | 9   | 24  | 24  | 24  | 38%  | 100% | 100% | 100% | P | P | P | P | U |
| b3938   | metJ | 4126101 | 4126418 | - | 317  | 12  | 12  | 12  | 12  | 12  | 100% | 100% | 100% | 100% | P | P | P | P |   |
| b3944   | yijF | 4135063 | 4135680 | - | 617  | 25  | 0   | 0   | 0   | 0   | 0%   | 0%   | 0%   | 0%   | A | A | A | A | U |
| b3945   | gldA | 4135955 | 4137058 | - | 1103 | 44  | 3   | 20  | 20  | 28  | 7%   | 45%  | 45%  | 64%  | P | P | P | P |   |
| b3946   | fsaB | 4137069 | 4137731 | - | 662  | 27  | 2   | 3   | 4   | 5   | 7%   | 11%  | 15%  | 19%  | P | P | P | P |   |
| b3947   | ptsA | 4137743 | 4140244 | - | 2501 | 100 | 0   | 0   | 4   | 4   | 0%   | 0%   | 4%   | 4%   | A | A | P | P | U |
| b3954   | yijO | 4145489 | 4146340 | - | 851  | 34  | 16  | 16  | 16  | 16  | 47%  | 47%  | 47%  | 47%  | P | P | P | P | U |
| b3955   | yijP | 4146555 | 4148288 | - | 1733 | 69  | 69  | 69  | 69  | 69  | 100% | 100% | 100% | 100% | P | P | P | P | U |
| b3956   | ppc  | 4148470 | 4151121 | - | 2651 | 106 | 106 | 106 | 106 | 106 | 100% | 100% | 100% | 100% | P | P | P | P |   |
| b3957   | argE | 4151719 | 4152870 | - | 1151 | 46  | 46  | 46  | 46  | 46  | 100% | 100% | 100% | 100% | P | P | P | P |   |
| b4458   | oxyS | 4156308 | 4156417 | - | 109  | 4   | 3   | 3   | 3   | 3   | 75%  | 75%  | 75%  | 75%  | P | P | P | P |   |
| b3962   | sthA | 4157413 | 4158813 | - | 1400 | 56  | 56  | 56  | 56  | 56  | 100% | 100% | 100% | 100% | P | P | P | P |   |
| b3965   | trmA | 4160193 | 4161293 | - | 1100 | 44  | 43  | 43  | 43  | 43  | 98%  | 98%  | 98%  | 98%  | P | P | P | P |   |
| b3974   | coaA | 4172099 | 4173049 | - | 950  | 38  | 37  | 37  | 37  | 37  | 97%  | 97%  | 97%  | 97%  | P | P | P | P |   |
| G0-9388 | sroH | 4188350 | 4188510 | - | 160  | 6   | 4   | 4   | 4   | 4   | 67%  | 67%  | 67%  | 67%  | P | P | P | P |   |
| b3990   | thiH | 4188758 | 4189891 | - | 1133 | 45  | 45  | 45  | 45  | 45  | 100% | 100% | 100% | 100% | P | P | P | P |   |
| b3991   | thiG | 4189888 | 4190658 | - | 770  | 31  | 31  | 31  | 31  | 31  | 100% | 100% | 100% | 100% | P | P | P | P |   |
| b4407   | thiS | 4190660 | 4190860 | - | 200  | 8   | 8   | 8   | 8   | 8   | 100% | 100% | 100% | 100% | P | P | P | P |   |
| b3992   | thiF | 4190844 | 4191599 | - | 755  | 31  | 31  | 31  | 31  | 31  | 100% | 100% | 100% | 100% | P | P | P | P |   |
| b3993   | thiE | 4191592 | 4192227 | - | 635  | 26  | 26  | 26  | 26  | 26  | 100% | 100% | 100% | 100% | P | P | P | P |   |
| b3994   | thiC | 4192227 | 4194122 | - | 1895 | 75  | 75  | 75  | 75  | 75  | 100% | 100% | 100% | 100% | P | P | P | P |   |
| b3995   | rsd  | 4194355 | 4194831 | - | 476  | 19  | 19  | 19  | 19  | 19  | 100% | 100% | 100% | 100% | P | P | P | P |   |
| b4002   | zraP | 4199286 | 4199711 | - | 425  | 17  | 0   | 0   | 0   | 16  | 0%   | 0%   | 0%   | 94%  | A | A | A | P |   |
| b4005   | purD | 4202665 | 4203954 | - | 1289 | 52  | 51  | 51  | 51  | 51  | 98%  | 98%  | 98%  | 98%  | P | P | P | P |   |
| b4006   | purH | 4203966 | 4205555 | - | 1589 | 64  | 64  | 64  | 64  | 64  | 100% | 100% | 100% | 100% | P | P | P | P |   |
| b4012   | yjaB | 4211703 | 4212146 | - | 443  | 17  | 12  | 14  | 15  | 15  | 71%  | 82%  | 88%  | 88%  | P | P | P | P | U |
| b4017   | arpA | 4218324 | 4220510 | - | 2186 | 88  | 0   | 0   | 0   | 0   | 0%   | 0%   | 0%   | 0%   | A | A | A | A | U |
| b4018   | iclR | 4220827 | 4221651 | - | 824  | 33  | 31  | 31  | 31  | 31  | 94%  | 94%  | 94%  | 94%  | P | P | P | P |   |
| b4021   | pepE | 4227476 | 4228165 | - | 689  | 28  | 7   | 9   | 9   | 14  | 25%  | 32%  | 32%  | 50%  | P | P | P | P |   |
| b4023   | pagB | 4229382 | 4229654 | - | 272  | 11  | 11  | 11  | 11  | 11  | 100% | 100% | 100% | 100% | P | P | P | P | U |
| b4024   | lysC | 4229907 | 4231256 | - | 1349 | 54  | 54  | 54  | 54  | 54  | 100% | 100% | 100% | 100% | P | P | P | P |   |
| b4620   | yjbT | 4237800 | 4238078 | - | 278  | 11  | 0   | 1   | 2   | 2   | 0%   | 9%   | 18%  | 18%  | A | P | P | P | U |
| b4031   | xylE | 4238802 | 4240277 | - | 1475 | 59  | 0   | 1   | 2   | 2   | 0%   | 2%   | 3%   | 3%   | A | P | P | P |   |
| b4032   | malG | 4240649 | 4241539 | - | 890  | 36  | 2   | 2   | 2   | 2   | 6%   | 6%   | 6%   | 6%   | P | P | P | P |   |
| b4033   | malF | 4241554 | 4243098 | - | 1544 | 62  | 13  | 13  | 13  | 13  | 21%  | 21%  | 21%  | 21%  | P | P | P | P |   |
| b4034   | malE | 4243252 | 4244442 | - | 1190 | 48  | 46  | 46  | 46  | 46  | 96%  | 96%  | 96%  | 96%  | P | P | P | P |   |
| b4041   | plsB | 4252066 | 4254489 | - | 2423 | 96  | 96  | 96  | 96  | 96  | 100% | 100% | 100% | 100% | P | P | P | P |   |
| b4046   | zur  | 4257511 | 4258026 | - | 515  | 21  | 18  | 18  | 18  | 18  | 86%  | 86%  | 86%  | 86%  | P | P | P | P |   |
| b4051   | qor  | 4261271 | 4262254 | - | 983  | 39  | 38  | 38  | 38  | 39  | 97%  | 97%  | 97%  | 100% | P | P | P | P |   |
| b4621   | yjbS | 4266832 | 4267035 | - | 203  | 8   | 0   | 0   | 0   | 0   | 0%   | 0%   | 0%   | 0%   | A | A | A | A | U |

|       |       |         |         |   |      |     |     |     |     |     |      |      |      |      |   |   |   |   |   |
|-------|-------|---------|---------|---|------|-----|-----|-----|-----|-----|------|------|------|------|---|---|---|---|---|
| b4058 | uvrA  | 4269072 | 4271894 | - | 2822 | 113 | 104 | 104 | 104 | 104 | 92%  | 92%  | 92%  | 92%  | P | P | P | P |   |
| b4060 | yjcB  | 4272783 | 4273064 | - | 281  | 11  | 6   | 8   | 8   | 8   | 55%  | 73%  | 73%  | 73%  | P | P | P | P | U |
| b4062 | soxS  | 4275083 | 4275406 | - | 323  | 13  | 12  | 12  | 12  | 12  | 92%  | 92%  | 92%  | 92%  | P | P | P | P |   |
| b4459 | ryjA  | 4275950 | 4276089 | - | 139  | 5   | 4   | 4   | 4   | 4   | 80%  | 80%  | 80%  | 80%  | P | P | P | P | U |
| b4066 | yjcF  | 4279806 | 4281098 | - | 1292 | 52  | 0   | 0   | 0   | 0   | 0%   | 0%   | 0%   | 0%   | A | A | A | A | U |
| b4067 | actP  | 4281276 | 4282925 | - | 1649 | 66  | 31  | 31  | 33  | 33  | 47%  | 47%  | 50%  | 50%  | P | P | P | P |   |
| b4068 | yjcH  | 4282922 | 4283236 | - | 314  | 12  | 6   | 6   | 6   | 6   | 50%  | 50%  | 50%  | 50%  | P | P | P | P | U |
| b4069 | acs   | 4283436 | 4285394 | - | 1958 | 79  | 78  | 78  | 78  | 78  | 99%  | 99%  | 99%  | 99%  | P | P | P | P |   |
| b4078 | yjcO  | 4294459 | 4295148 | - | 689  | 28  | 28  | 28  | 28  | 28  | 100% | 100% | 100% | 100% | P | P | P | P | U |
| b4079 | fdhF  | 4295242 | 4297389 | - | 2147 | 86  | 30  | 54  | 55  | 61  | 35%  | 63%  | 64%  | 71%  | P | P | P | P |   |
| b4080 | mdtP  | 4297587 | 4299053 | - | 1466 | 59  | 0   | 0   | 2   | 2   | 0%   | 0%   | 3%   | 3%   | A | A | P | P | U |
| b4081 | mdtO  | 4299050 | 4301101 | - | 2051 | 82  | 0   | 0   | 7   | 7   | 0%   | 0%   | 9%   | 9%   | A | A | P | P | U |
| b4082 | mdtN  | 4301101 | 4302132 | - | 1031 | 41  | 0   | 0   | 1   | 1   | 0%   | 0%   | 2%   | 2%   | A | A | P | P | U |
| b4622 | yticA | 4302151 | 4302426 | - | 275  | 11  | 0   | 0   | 0   | 0   | 0%   | 0%   | 0%   | 0%   | A | A | A | A | U |
| b4083 | yjcS  | 4302635 | 4304620 | - | 1985 | 80  | 0   | 0   | 5   | 5   | 0%   | 0%   | 6%   | 6%   | A | A | P | P | U |
| b4084 | alsK  | 4304893 | 4305822 | - | 929  | 38  | 0   | 0   | 5   | 5   | 0%   | 0%   | 13%  | 13%  | A | A | P | P |   |
| b4085 | alsE  | 4305806 | 4306501 | - | 695  | 28  | 0   | 0   | 5   | 5   | 0%   | 0%   | 18%  | 18%  | A | A | P | P |   |
| b4086 | alsC  | 4306512 | 4307492 | - | 980  | 39  | 0   | 0   | 0   | 0   | 0%   | 0%   | 0%   | 0%   | A | A | A | A |   |
| b4087 | alsA  | 4307471 | 4309003 | - | 1532 | 61  | 0   | 0   | 0   | 0   | 0%   | 0%   | 0%   | 0%   | A | A | A | A |   |
| b4088 | alsB  | 4309130 | 4310065 | - | 935  | 37  | 4   | 4   | 4   | 4   | 11%  | 11%  | 11%  | 11%  | P | P | P | P |   |
| b4089 | rpiR  | 4310124 | 4311014 | - | 890  | 35  | 31  | 31  | 31  | 31  | 89%  | 89%  | 89%  | 89%  | P | P | P | P |   |
| b4092 | phnP  | 4312367 | 4313125 | - | 758  | 31  | 13  | 13  | 13  | 13  | 42%  | 42%  | 42%  | 42%  | P | P | P | P |   |
| b4093 | phnO  | 4313127 | 4313561 | - | 434  | 17  | 13  | 13  | 13  | 13  | 76%  | 76%  | 76%  | 76%  | P | P | P | P | U |
| b4094 | phnN  | 4313548 | 4314105 | - | 557  | 22  | 3   | 3   | 7   | 7   | 14%  | 14%  | 32%  | 32%  | P | P | P | P |   |
| b4095 | phnM  | 4314105 | 4315241 | - | 1136 | 45  | 0   | 0   | 2   | 2   | 0%   | 0%   | 4%   | 4%   | A | A | P | P |   |
| b4096 | phnL  | 4315238 | 4315918 | - | 680  | 27  | 0   | 0   | 0   | 0   | 0%   | 0%   | 0%   | 0%   | A | A | A | A |   |
| b4097 | phnK  | 4316029 | 4316787 | - | 758  | 30  | 0   | 0   | 1   | 1   | 0%   | 0%   | 3%   | 3%   | A | A | P | P |   |
| b4098 | phnJ  | 4316784 | 4317629 | - | 845  | 34  | 0   | 0   | 2   | 2   | 0%   | 0%   | 6%   | 6%   | A | A | P | P |   |
| b4099 | phnI  | 4317622 | 4318686 | - | 1064 | 42  | 0   | 0   | 3   | 3   | 0%   | 0%   | 7%   | 7%   | A | A | P | P |   |
| b4100 | phnH  | 4318686 | 4319270 | - | 584  | 24  | 0   | 0   | 0   | 0   | 0%   | 0%   | 0%   | 0%   | A | A | A | A |   |
| b4101 | phnG  | 4319267 | 4319719 | - | 452  | 19  | 0   | 0   | 1   | 1   | 0%   | 0%   | 5%   | 5%   | A | A | P | P |   |
| b4102 | phnF  | 4319720 | 4320445 | - | 725  | 29  | 0   | 0   | 2   | 2   | 0%   | 0%   | 7%   | 7%   | A | A | P | P | U |
| b4104 | phnE  | 4320466 | 4321253 | - | 787  | 32  | 0   | 0   | 1   | 3   | 0%   | 0%   | 3%   | 9%   | A | A | P | P | U |
| b4105 | phnD  | 4321359 | 4322375 | - | 1016 | 41  | 0   | 0   | 2   | 2   | 0%   | 0%   | 5%   | 5%   | A | A | P | P |   |
| b4106 | phnC  | 4322400 | 4323188 | - | 788  | 31  | 0   | 0   | 1   | 1   | 0%   | 0%   | 3%   | 3%   | A | A | P | P |   |
| b4107 | yjdN  | 4323321 | 4323764 | - | 443  | 17  | 12  | 13  | 17  | 17  | 71%  | 76%  | 100% | 100% | P | P | P | P | U |
| b4108 | yjdM  | 4324422 | 4324757 | - | 335  | 13  | 13  | 13  | 13  | 13  | 100% | 100% | 100% | 100% | P | P | P | P | U |
| b4112 | basS  | 4330204 | 4331295 | - | 1091 | 44  | 23  | 23  | 25  | 25  | 52%  | 52%  | 57%  | 57%  | P | P | P | P |   |
| b4113 | basR  | 4331305 | 4331973 | - | 668  | 27  | 22  | 22  | 23  | 24  | 81%  | 81%  | 85%  | 89%  | P | P | P | P |   |
| b4114 | eptA  | 4331970 | 4333613 | - | 1643 | 65  | 10  | 11  | 15  | 15  | 15%  | 17%  | 23%  | 23%  | P | P | P | P | U |
| b4115 | adiC  | 4333717 | 4335054 | - | 1337 | 54  | 0   | 0   | 3   | 3   | 0%   | 0%   | 6%   | 6%   | A | A | P | P |   |
| b4116 | adiY  | 4335191 | 4335952 | - | 761  | 31  | 0   | 0   | 0   | 0   | 0%   | 0%   | 0%   | 0%   | A | A | A | A |   |
| b4117 | adiA  | 4336277 | 4338547 | - | 2270 | 91  | 0   | 0   | 2   | 2   | 0%   | 0%   | 2%   | 2%   | A | A | P | P |   |
| b4118 | melR  | 4338743 | 4339651 | - | 908  | 37  | 11  | 11  | 34  | 34  | 30%  | 30%  | 92%  | 92%  | P | P | P | P |   |
| b4121 | yjdF  | 4342952 | 4343581 | - | 629  | 25  | 9   | 9   | 11  | 11  | 36%  | 36%  | 44%  | 44%  | P | P | P | P | U |
| b4122 | fumB  | 4343703 | 4345349 | - | 1646 | 66  | 8   | 8   | 11  | 14  | 12%  | 12%  | 17%  | 21%  | P | P | P | P |   |

|       |      |         |         |   |      |     |    |    |    |    |      |      |      |      |   |   |   |   |   |
|-------|------|---------|---------|---|------|-----|----|----|----|----|------|------|------|------|---|---|---|---|---|
| b4123 | dcuB | 4345427 | 4346767 | - | 1340 | 53  | 0  | 4  | 9  | 22 | 0%   | 8%   | 17%  | 42%  | A | P | P | P |   |
| b4124 | dcuR | 4347338 | 4348057 | - | 719  | 29  | 24 | 24 | 24 | 24 | 83%  | 83%  | 83%  | 83%  | P | P | P | P |   |
| b4125 | dcuS | 4348054 | 4349685 | - | 1631 | 65  | 43 | 44 | 44 | 44 | 66%  | 68%  | 68%  | 68%  | P | P | P | P |   |
| b4129 | lysU | 4351223 | 4352740 | - | 1517 | 61  | 54 | 54 | 54 | 56 | 89%  | 89%  | 89%  | 92%  | P | P | P | P |   |
| b4130 | yjdL | 4352977 | 4354434 | - | 1457 | 58  | 7  | 12 | 12 | 15 | 12%  | 21%  | 21%  | 26%  | P | P | P | P | U |
| b4131 | cadA | 4354493 | 4356640 | - | 2147 | 86  | 0  | 0  | 0  | 0  | 0%   | 0%   | 0%   | 0%   | A | A | A | A |   |
| b4132 | cadB | 4356720 | 4358054 | - | 1334 | 54  | 0  | 0  | 0  | 0  | 0%   | 0%   | 0%   | 0%   | A | A | A | A | U |
| b4133 | cadC | 4358419 | 4359957 | - | 1538 | 62  | 0  | 0  | 0  | 0  | 0%   | 0%   | 0%   | 0%   | A | A | A | A |   |
| b4654 | yjdQ | 4360214 | 4360376 | - | 162  | 7   | 0  | 0  | 0  | 0  | 0%   | 0%   | 0%   | 0%   | A | A | A | A | U |
| b4134 | pheU | 4360574 | 4360649 | - | 75   | 4   | 3  | 3  | 4  | 4  | 75%  | 75%  | 100% | 100% | P | P | P | P |   |
| b4135 | yjdC | 4360756 | 4361331 | - | 575  | 23  | 23 | 23 | 23 | 23 | 100% | 100% | 100% | 100% | P | P | P | P | U |
| b4136 | dipZ | 4361368 | 4363065 | - | 1697 | 68  | 67 | 67 | 67 | 67 | 99%  | 99%  | 99%  | 99%  | P | P | P | P | U |
| b4137 | cutA | 4363041 | 4363379 | - | 338  | 14  | 14 | 14 | 14 | 14 | 100% | 100% | 100% | 100% | P | P | P | P |   |
| b4138 | dcuA | 4363495 | 4364796 | - | 1301 | 52  | 50 | 50 | 50 | 50 | 96%  | 96%  | 96%  | 96%  | P | P | P | P |   |
| b4139 | aspA | 4364914 | 4366350 | - | 1436 | 58  | 42 | 46 | 56 | 56 | 72%  | 79%  | 97%  | 97%  | P | P | P | P |   |
| b4141 | yjeH | 4367179 | 4368435 | - | 1256 | 50  | 45 | 45 | 45 | 45 | 90%  | 90%  | 90%  | 90%  | P | P | P | P | U |
| b4145 | yjeJ | 4371388 | 4372257 | - | 869  | 35  | 0  | 0  | 0  | 0  | 0%   | 0%   | 0%   | 0%   | A | A | A | A | U |
| b4146 | yjeK | 4372652 | 4373680 | - | 1028 | 41  | 40 | 40 | 40 | 40 | 98%  | 98%  | 98%  | 98%  | P | P | P | P | U |
| b4149 | blc  | 4375212 | 4375745 | - | 533  | 21  | 20 | 21 | 21 | 21 | 95%  | 100% | 100% | 100% | P | P | P | P |   |
| b4150 | ampC | 4375834 | 4376967 | - | 1133 | 45  | 35 | 35 | 35 | 35 | 78%  | 78%  | 78%  | 78%  | P | P | P | P |   |
| b4151 | frdD | 4377030 | 4377389 | - | 359  | 14  | 0  | 13 | 13 | 13 | 0%   | 93%  | 93%  | 93%  | A | P | P | P |   |
| b4152 | frdC | 4377400 | 4377795 | - | 395  | 15  | 6  | 8  | 9  | 9  | 40%  | 53%  | 60%  | 60%  | P | P | P | P |   |
| b4153 | frdB | 4377806 | 4378540 | - | 734  | 29  | 23 | 25 | 28 | 28 | 79%  | 86%  | 97%  | 97%  | P | P | P | P |   |
| b4154 | frdA | 4378533 | 4380341 | - | 1808 | 72  | 69 | 69 | 70 | 72 | 96%  | 96%  | 97%  | 100% | P | P | P | P |   |
| b4159 | yjeP | 4384070 | 4387393 | - | 3323 | 133 | 83 | 83 | 83 | 83 | 62%  | 62%  | 62%  | 62%  | P | P | P | P | U |
| b4160 | psd  | 4387415 | 4388383 | - | 968  | 39  | 39 | 39 | 39 | 39 | 100% | 100% | 100% | 100% | P | P | P | P |   |
| b4161 | rsgA | 4388480 | 4389532 | - | 1052 | 42  | 42 | 42 | 42 | 42 | 100% | 100% | 100% | 100% | P | P | P | P |   |
| b4166 | yjeS | 4390951 | 4392090 | - | 1139 | 46  | 26 | 26 | 26 | 32 | 57%  | 57%  | 57%  | 70%  | P | P | P | P | U |
| b4188 | yjfN | 4414040 | 4414315 | - | 275  | 11  | 3  | 8  | 11 | 11 | 27%  | 73%  | 100% | 100% | P | P | P | P | U |
| b4189 | yjfO | 4414464 | 4414793 | - | 329  | 13  | 11 | 12 | 13 | 13 | 85%  | 92%  | 100% | 100% | P | P | P | P | U |
| b4191 | ulaR | 4415721 | 4416476 | - | 755  | 30  | 25 | 25 | 25 | 25 | 83%  | 83%  | 83%  | 83%  | P | P | P | P |   |
| b4192 | ulaG | 4416584 | 4417648 | - | 1064 | 43  | 0  | 8  | 12 | 12 | 0%   | 19%  | 28%  | 28%  | A | P | P | P | U |
| b4199 | yjfY | 4422539 | 4422814 | - | 275  | 11  | 0  | 10 | 11 | 11 | 0%   | 91%  | 100% | 100% | A | P | P | P | U |
| b4204 | yjfZ | 4424651 | 4425445 | - | 794  | 32  | 0  | 0  | 0  | 0  | 0%   | 0%   | 0%   | 0%   | A | A | A | A | U |
| b4206 | ytfB | 4426102 | 4426740 | - | 638  | 25  | 24 | 24 | 24 | 24 | 96%  | 96%  | 96%  | 96%  | P | P | P | P | U |
| b4209 | ytfE | 4429344 | 4430006 | - | 662  | 27  | 0  | 0  | 17 | 17 | 0%   | 0%   | 63%  | 63%  | A | A | P | P | U |
| b4210 | ytfF | 4430114 | 4431088 | - | 974  | 39  | 3  | 3  | 3  | 3  | 8%   | 8%   | 8%   | 8%   | P | P | P | P | U |
| b4211 | ytfG | 4431187 | 4432047 | - | 860  | 35  | 19 | 21 | 21 | 21 | 54%  | 60%  | 60%  | 60%  | P | P | P | P |   |
| b4213 | cpdB | 4432645 | 4434588 | - | 1943 | 78  | 65 | 65 | 65 | 65 | 83%  | 83%  | 83%  | 83%  | P | P | P | P |   |
| b4216 | ytfJ | 4436731 | 4437285 | - | 554  | 22  | 2  | 15 | 17 | 17 | 9%   | 68%  | 77%  | 77%  | P | P | P | P | U |
| b4218 | ytfL | 4437895 | 4439238 | - | 1343 | 54  | 41 | 41 | 43 | 43 | 76%  | 76%  | 80%  | 80%  | P | P | P | P | U |
| b4219 | msrA | 4439561 | 4440199 | - | 638  | 26  | 26 | 26 | 26 | 26 | 100% | 100% | 100% | 100% | P | P | P | P |   |
| b4226 | ppa  | 4447145 | 4447675 | - | 530  | 22  | 22 | 22 | 22 | 22 | 100% | 100% | 100% | 100% | P | P | P | P |   |
| b4232 | fbp  | 4452634 | 4453632 | - | 998  | 40  | 40 | 40 | 40 | 40 | 100% | 100% | 100% | 100% | P | P | P | P |   |
| b4234 | yjgA | 4455337 | 4455888 | - | 551  | 22  | 22 | 22 | 22 | 22 | 100% | 100% | 100% | 100% | P | P | P | P | U |
| b4237 | nrdG | 4457923 | 4458387 | - | 464  | 18  | 0  | 1  | 4  | 4  | 0%   | 6%   | 22%  | 22%  | A | P | P | P |   |



|       |      |         |         |   |      |     |     |     |     |     |      |      |      |      |   |   |   |   |   |
|-------|------|---------|---------|---|------|-----|-----|-----|-----|-----|------|------|------|------|---|---|---|---|---|
| b4238 | nrdD | 4458545 | 4460683 | - | 2138 | 86  | 49  | 72  | 84  | 84  | 57%  | 84%  | 98%  | 98%  | P | P | P | P |   |
| b4239 | treC | 4461077 | 4462732 | - | 1655 | 67  | 0   | 0   | 0   | 0   | 0%   | 0%   | 0%   | 0%   | A | A | A | A |   |
| b4240 | treB | 4462782 | 4464203 | - | 1421 | 56  | 0   | 9   | 9   | 9   | 0%   | 16%  | 16%  | 16%  | A | P | P | P |   |
| b4241 | treR | 4464322 | 4465269 | - | 947  | 38  | 26  | 26  | 26  | 26  | 68%  | 68%  | 68%  | 68%  | P | P | P | P |   |
| b4243 | yjgF | 4468550 | 4468936 | - | 386  | 16  | 16  | 16  | 16  | 16  | 100% | 100% | 100% | 100% | P | P | P | P |   |
| b4244 | pyrI | 4469009 | 4469470 | - | 461  | 19  | 19  | 19  | 19  | 19  | 100% | 100% | 100% | 100% | P | P | P | P |   |
| b4245 | pyrB | 4469483 | 4470418 | - | 935  | 38  | 38  | 38  | 38  | 38  | 100% | 100% | 100% | 100% | P | P | P | P |   |
| b4246 | pyrL | 4470422 | 4470556 | - | 134  | 5   | 5   | 5   | 5   | 5   | 100% | 100% | 100% | 100% | P | P | P | P |   |
| b4248 | yjgH | 4470837 | 4471232 | - | 395  | 15  | 15  | 15  | 15  | 15  | 100% | 100% | 100% | 100% | P | P | P | P | U |
| b4249 | yjgI | 4471363 | 4472076 | - | 713  | 28  | 0   | 15  | 15  | 15  | 0%   | 54%  | 54%  | 54%  | A | P | P | P | U |
| b4254 | argI | 4475330 | 4476334 | - | 1004 | 40  | 40  | 40  | 40  | 40  | 100% | 100% | 100% | 100% | P | P | P | P |   |
| b4256 | yjgM | 4477057 | 4477560 | - | 503  | 21  | 18  | 19  | 19  | 19  | 86%  | 90%  | 90%  | 90%  | P | P | P | P | U |
| b4258 | valS | 4479005 | 4481860 | - | 2855 | 114 | 114 | 114 | 114 | 114 | 100% | 100% | 100% | 100% | P | P | P | P |   |
| b4259 | holC | 4481860 | 4482303 | - | 443  | 18  | 18  | 18  | 18  | 18  | 100% | 100% | 100% | 100% | P | P | P | P |   |
| b4260 | pepA | 4482463 | 4483974 | - | 1511 | 61  | 61  | 61  | 61  | 61  | 100% | 100% | 100% | 100% | P | P | P | P |   |
| b4263 | yjgR | 4486584 | 4488086 | - | 1502 | 60  | 58  | 58  | 60  | 60  | 97%  | 97%  | 100% | 100% | P | P | P | P | U |
| b4264 | idnR | 4488164 | 4489162 | - | 998  | 39  | 31  | 32  | 32  | 34  | 79%  | 82%  | 82%  | 87%  | P | P | P | P |   |
| b4265 | idnT | 4489229 | 4490548 | - | 1319 | 53  | 14  | 14  | 14  | 15  | 26%  | 26%  | 26%  | 28%  | P | P | P | P |   |
| b4266 | idnO | 4490610 | 4491374 | - | 764  | 31  | 0   | 4   | 4   | 4   | 0%   | 13%  | 13%  | 13%  | A | P | P | P |   |
| b4267 | idnD | 4491398 | 4492429 | - | 1031 | 41  | 0   | 0   | 0   | 0   | 0%   | 0%   | 0%   | 0%   | A | A | A | A |   |
| b4269 | yjgB | 4493213 | 4494232 | - | 1019 | 41  | 31  | 31  | 35  | 35  | 76%  | 76%  | 85%  | 85%  | P | P | P | P | U |
| b4575 | yjgX | 4497616 | 4498814 | - | 1198 | 48  | 9   | 10  | 14  | 14  | 19%  | 21%  | 29%  | 29%  | P | P | P | P | U |
| b4278 | insG | 4500126 | 4501454 | - | 1328 | 53  | 34  | 34  | 36  | 36  | 64%  | 64%  | 68%  | 68%  | P | P | P | P | U |
| b4281 | yjhD | 4504649 | 4504879 | - | 230  | 9   | 0   | 4   | 4   | 4   | 0%   | 44%  | 44%  | 44%  | A | P | P | P | U |
| b4284 | insI | 4505489 | 4506640 | - | 1151 | 46  | 44  | 44  | 44  | 45  | 96%  | 96%  | 96%  | 98%  | P | P | P | P |   |
| b4561 | insM | 4506699 | 4506965 | - | 266  | 11  | 0   | 0   | 0   | 0   | 0%   | 0%   | 0%   | 0%   | A | A | A | A | U |
| b4287 | fecE | 4508713 | 4509480 | - | 767  | 31  | 6   | 6   | 6   | 8   | 19%  | 19%  | 19%  | 26%  | P | P | P | P |   |
| b4288 | fecD | 4509481 | 4510437 | - | 956  | 38  | 3   | 3   | 3   | 3   | 8%   | 8%   | 8%   | 8%   | P | P | P | P |   |
| b4289 | fecC | 4510434 | 4511432 | - | 998  | 40  | 0   | 0   | 0   | 0   | 0%   | 0%   | 0%   | 0%   | A | A | A | A |   |
| b4290 | fecB | 4511429 | 4512331 | - | 902  | 36  | 7   | 7   | 7   | 10  | 19%  | 19%  | 19%  | 28%  | P | P | P | P |   |
| b4291 | fecA | 4512376 | 4514700 | - | 2324 | 93  | 13  | 13  | 15  | 26  | 14%  | 14%  | 16%  | 28%  | P | P | P | P |   |
| b4292 | fecR | 4514787 | 4515740 | - | 953  | 38  | 20  | 20  | 20  | 29  | 53%  | 53%  | 53%  | 76%  | P | P | P | P |   |
| b4293 | fecI | 4515737 | 4516258 | - | 521  | 21  | 20  | 20  | 20  | 21  | 95%  | 95%  | 95%  | 100% | P | P | P | P |   |
| b4295 | yjhU | 4517361 | 4518347 | - | 986  | 40  | 40  | 40  | 40  | 40  | 100% | 100% | 100% | 100% | P | P | P | P | U |
| b4296 | yjhF | 4518694 | 4520043 | - | 1349 | 54  | 0   | 1   | 2   | 2   | 0%   | 2%   | 4%   | 4%   | A | P | P | P | U |
| b4297 | yjhG | 4520150 | 4522117 | - | 1967 | 78  | 0   | 3   | 9   | 9   | 0%   | 4%   | 12%  | 12%  | A | P | P | P | U |
| b4298 | yjhH | 4522128 | 4523033 | - | 905  | 36  | 0   | 0   | 1   | 1   | 0%   | 0%   | 3%   | 3%   | A | A | P | P | U |
| b4299 | yjhI | 4523038 | 4523826 | - | 788  | 32  | 0   | 1   | 2   | 2   | 0%   | 3%   | 6%   | 6%   | A | P | P | P | U |
| b4300 | sgcR | 4524129 | 4524911 | - | 782  | 31  | 1   | 1   | 5   | 5   | 3%   | 3%   | 16%  | 16%  | P | P | P | P | U |
| b4301 | sgcE | 4524928 | 4525560 | - | 632  | 25  | 1   | 2   | 17  | 17  | 4%   | 8%   | 68%  | 68%  | P | P | P | P | U |
| b4302 | sgcA | 4525572 | 4526003 | - | 431  | 17  | 3   | 4   | 15  | 15  | 18%  | 24%  | 88%  | 88%  | P | P | P | P | U |
| b4303 | sgcQ | 4526134 | 4526940 | - | 806  | 32  | 0   | 0   | 31  | 31  | 0%   | 0%   | 97%  | 97%  | A | A | P | P | U |
| b4304 | sgcC | 4526953 | 4528266 | - | 1313 | 52  | 2   | 2   | 52  | 52  | 4%   | 4%   | 100% | 100% | P | P | P | P | U |
| b4565 | sgcB | 4528278 | 4528556 | - | 278  | 11  | 0   | 0   | 11  | 11  | 0%   | 0%   | 100% | 100% | A | A | P | P | U |
| b4305 | sgcX | 4528553 | 4529674 | - | 1121 | 45  | 3   | 3   | 44  | 44  | 7%   | 7%   | 98%  | 98%  | P | P | P | P | U |
| b4656 | yjhY | 4530073 | 4530333 | - | 260  | 10  | 10  | 10  | 10  | 10  | 100% | 100% | 100% | 100% | P | P | P | P | U |

|       |      |         |         |   |      |     |     |     |     |     |      |      |      |      |   |   |   |   |   |
|-------|------|---------|---------|---|------|-----|-----|-----|-----|-----|------|------|------|------|---|---|---|---|---|
| b4306 | yjhP | 4530460 | 4531206 | - | 746  | 30  | 0   | 0   | 1   | 2   | 0%   | 0%   | 3%   | 7%   | A | A | P | P | U |
| b4307 | yjhQ | 4531262 | 4531807 | - | 545  | 22  | 0   | 8   | 8   | 8   | 0%   | 36%  | 36%  | 36%  | A | P | P | P | U |
| b4566 | yjhX | 4531819 | 4532076 | - | 257  | 11  | 0   | 2   | 2   | 2   | 0%   | 18%  | 18%  | 18%  | A | P | P | P | U |
| b4657 | yjhZ | 4532453 | 4532698 | - | 245  | 10  | 0   | 0   | 0   | 0   | 0%   | 0%   | 0%   | 0%   | A | A | A | A | U |
| b4309 | yjhS | 4534637 | 4535617 | - | 980  | 39  | 0   | 0   | 0   | 0   | 0%   | 0%   | 0%   | 0%   | A | A | A | A | U |
| b4310 | nanM | 4535682 | 4536788 | - | 1106 | 44  | 15  | 23  | 23  | 34  | 34%  | 52%  | 52%  | 77%  | P | P | P | P | U |
| b4311 | nanC | 4536808 | 4537524 | - | 716  | 29  | 1   | 1   | 2   | 5   | 3%   | 3%   | 7%   | 17%  | P | P | P | P |   |
| b4321 | gntP | 4547976 | 4549319 | - | 1343 | 53  | 0   | 38  | 38  | 38  | 0%   | 72%  | 72%  | 72%  | A | P | P | P |   |
| b4325 | yjiC | 4553513 | 4554343 | - | 830  | 33  | 0   | 0   | 0   | 0   | 0%   | 0%   | 0%   | 0%   | A | A | A | A | U |
| b4327 | yjiE | 4555401 | 4556312 | - | 911  | 36  | 23  | 24  | 24  | 24  | 64%  | 67%  | 67%  | 67%  | P | P | P | P | U |
| b4328 | iadA | 4556377 | 4557549 | - | 1172 | 47  | 45  | 45  | 47  | 47  | 96%  | 96%  | 100% | 100% | P | P | P | P |   |
| b4329 | yjiG | 4557562 | 4558023 | - | 461  | 19  | 4   | 4   | 4   | 4   | 21%  | 21%  | 21%  | 21%  | P | P | P | P | U |
| b4330 | yjiH | 4558020 | 4558703 | - | 683  | 28  | 0   | 0   | 1   | 5   | 0%   | 0%   | 4%   | 18%  | A | A | P | P | U |
| b4332 | yjiJ | 4559520 | 4560698 | - | 1178 | 48  | 0   | 1   | 8   | 8   | 0%   | 2%   | 17%  | 17%  | A | P | P | P | U |
| b4333 | yjiK | 4560766 | 4561626 | - | 860  | 35  | 0   | 1   | 2   | 2   | 0%   | 3%   | 6%   | 6%   | A | P | P | P | U |
| b4334 | yjiL | 4561945 | 4562712 | - | 767  | 31  | 0   | 0   | 0   | 0   | 0%   | 0%   | 0%   | 0%   | A | A | A | A | U |
| b4335 | yjiM | 4562722 | 4563873 | - | 1151 | 47  | 0   | 0   | 1   | 6   | 0%   | 0%   | 2%   | 13%  | A | A | P | P | U |
| b4336 | yjiN | 4563989 | 4565269 | - | 1280 | 51  | 5   | 10  | 14  | 28  | 10%  | 20%  | 27%  | 55%  | P | P | P | P | U |
| b4337 | mdtM | 4565310 | 4566542 | - | 1232 | 49  | 3   | 18  | 18  | 18  | 6%   | 37%  | 37%  | 37%  | P | P | P | P |   |
| b4340 | yjiR | 4568185 | 4569597 | - | 1412 | 56  | 42  | 42  | 42  | 42  | 75%  | 75%  | 75%  | 75%  | P | P | P | P | U |
| b4345 | mcrC | 4574935 | 4575981 | - | 1046 | 42  | 0   | 0   | 0   | 0   | 0%   | 0%   | 0%   | 0%   | A | A | A | A |   |
| b4346 | mcrB | 4575981 | 4577360 | - | 1379 | 55  | 43  | 43  | 43  | 43  | 78%  | 78%  | 78%  | 78%  | P | P | P | P |   |
| b4347 | symE | 4577522 | 4577863 | - | 341  | 13  | 3   | 4   | 4   | 4   | 23%  | 31%  | 31%  | 31%  | P | P | P | P | U |
| b4348 | hsdS | 4578091 | 4579485 | - | 1394 | 56  | 51  | 51  | 51  | 51  | 91%  | 91%  | 91%  | 91%  | P | P | P | P |   |
| b4349 | hsdM | 4579482 | 4581071 | - | 1589 | 64  | 64  | 64  | 64  | 64  | 100% | 100% | 100% | 100% | P | P | P | P |   |
| b4350 | hsdR | 4581272 | 4584838 | - | 3566 | 142 | 141 | 141 | 141 | 141 | 99%  | 99%  | 99%  | 99%  | P | P | P | P |   |
| b4352 | yjiA | 4585932 | 4586888 | - | 956  | 38  | 36  | 36  | 36  | 36  | 95%  | 95%  | 95%  | 95%  | P | P | P | P | U |
| b4353 | yjiX | 4586899 | 4587102 | - | 203  | 9   | 7   | 7   | 7   | 7   | 78%  | 78%  | 78%  | 78%  | P | P | P | P | U |
| b4354 | yjiY | 4587152 | 4589302 | - | 2150 | 86  | 0   | 0   | 6   | 78  | 0%   | 0%   | 7%   | 91%  | A | A | P | P | U |
| b4356 | yjjL | 4591384 | 4592745 | - | 1361 | 54  | 5   | 5   | 5   | 5   | 9%   | 9%   | 9%   | 9%   | P | P | P | P | U |
| b4357 | yjjM | 4592960 | 4593874 | - | 914  | 37  | 0   | 0   | 16  | 16  | 0%   | 0%   | 43%  | 43%  | A | A | P | P | U |
| b4359 | mdoB | 4595173 | 4597464 | - | 2291 | 92  | 86  | 86  | 86  | 87  | 93%  | 93%  | 93%  | 95%  | P | P | P | P |   |
| b4360 | yjjA | 4597718 | 4598212 | - | 494  | 20  | 19  | 19  | 19  | 19  | 95%  | 95%  | 95%  | 95%  | P | P | P | P | U |
| b4361 | dnaC | 4598261 | 4598998 | - | 737  | 29  | 28  | 28  | 28  | 28  | 97%  | 97%  | 97%  | 97%  | P | P | P | P |   |
| b4362 | dnaT | 4599001 | 4599540 | - | 539  | 21  | 21  | 21  | 21  | 21  | 100% | 100% | 100% | 100% | P | P | P | P |   |
| b4363 | yjjB | 4599647 | 4600120 | - | 473  | 19  | 0   | 0   | 0   | 0   | 0%   | 0%   | 0%   | 0%   | A | A | A | A | U |
| b4364 | yjjP | 4600111 | 4600881 | - | 770  | 31  | 0   | 2   | 2   | 11  | 0%   | 6%   | 6%   | 35%  | A | P | P | P | U |
| b4367 | fhuF | 4602898 | 4603686 | - | 788  | 32  | 32  | 32  | 32  | 32  | 100% | 100% | 100% | 100% | P | P | P | P |   |
| b4368 | leuV | 4604102 | 4604188 | - | 86   | 3   | 3   | 3   | 3   | 3   | 100% | 100% | 100% | 100% | P | P | P | P |   |
| b4369 | leuP | 4604223 | 4604309 | - | 86   | 4   | 4   | 4   | 4   | 4   | 100% | 100% | 100% | 100% | P | P | P | P |   |
| b4370 | leuQ | 4604338 | 4604424 | - | 86   | 4   | 4   | 4   | 4   | 4   | 100% | 100% | 100% | 100% | P | P | P | P |   |
| b4371 | rsmC | 4604692 | 4605723 | - | 1031 | 41  | 40  | 40  | 40  | 40  | 98%  | 98%  | 98%  | 98%  | P | P | P | P |   |
| b4379 | yjjW | 4612703 | 4613566 | - | 863  | 34  | 0   | 0   | 0   | 0   | 0%   | 0%   | 0%   | 0%   | A | A | A | A | U |
| b4380 | yjjI | 4613538 | 4615088 | - | 1550 | 62  | 0   | 8   | 8   | 27  | 0%   | 13%  | 13%  | 44%  | A | P | P | P | U |
| b4386 | lplA | 4621124 | 4622140 | - | 1016 | 41  | 33  | 33  | 33  | 33  | 80%  | 80%  | 80%  | 80%  | P | P | P | P |   |
| b4387 | ytjB | 4622168 | 4622812 | - | 644  | 26  | 26  | 26  | 26  | 26  | 100% | 100% | 100% | 100% | P | P | P | P | U |

|       |      |         |         |   |      |    |    |    |    |    |      |      |      |      |   |   |   |   |   |
|-------|------|---------|---------|---|------|----|----|----|----|----|------|------|------|------|---|---|---|---|---|
| b4391 | yjjK | 4626878 | 4628545 | - | 1667 | 66 | 66 | 66 | 66 | 66 | 100% | 100% | 100% | 100% | P | P | P | P | U |
| b4394 | yjjX | 4631256 | 4631768 | - | 512  | 20 | 18 | 18 | 18 | 18 | 90%  | 90%  | 90%  | 90%  | P | P | P | P |   |
| b4396 | rob  | 4632464 | 4633333 | - | 869  | 35 | 35 | 35 | 35 | 35 | 100% | 100% | 100% | 100% | P | P | P | P |   |
| b4401 | arcA | 4637613 | 4638329 | - | 716  | 29 | 29 | 29 | 29 | 29 | 100% | 100% | 100% | 100% | P | P | P | P |   |
