# Supplementary material
Source: PubMed Central journal article supplement (PMC3832199)
Supplement: NIHMS251755-supplement-Supplement_Table4.pdf [file NIHMS251755-supplement-Supplement_Table4.pdf]

**Supplementary Table 4: Genome-scale determination of transcription start sites (TSSs), mapping onto RTSs.** Abbreviations: R1, log phase; R2, log phase+heat-shocked condition; R3, log phase+heat-shocked condition+stationary phase.

| TSS ID     | Strand | TSS position | Sequencing Reads |      |      | RTS ID     |
|------------|--------|--------------|------------------|------|------|------------|
|            |        |              | R1               | R2   | R3   |            |
| TSS-FWD-1  | FWD    | 148          | 3459             | 3502 | 3522 | RTS_R4+_1  |
| TSS-FWD-2  | FWD    | 163          | 774              | 774  | 774  | RTS_R4+_1  |
| TSS-FWD-3  | FWD    | 170          | 734              | 735  | 736  | RTS_R4+_1  |
| TSS-FWD-4  | FWD    | 2688         | 72               | 72   | 72   | RTS_R4+_2  |
| TSS-FWD-5  | FWD    | 5118         | 3                | 3    | 3    | RTS_R4+_3  |
| TSS-FWD-6  | FWD    | 8191         | 933              | 936  | 938  | RTS_R4+_4  |
| TSS-FWD-7  | FWD    | 8198         | 3122             | 3130 | 3136 | RTS_R4+_4  |
| TSS-FWD-8  | FWD    | 8204         | 197              | 197  | 197  | RTS_R4+_4  |
| TSS-FWD-9  | FWD    | 8211         | 110              | 110  | 110  | RTS_R4+_4  |
| TSS-FWD-10 | FWD    | 8230         | 71               | 71   | 73   | RTS_R4+_4  |
| TSS-FWD-11 | FWD    | 9277         | 137              | 138  | 138  | RTS_R4+_5  |
| TSS-FWD-12 | FWD    | 12048        | 1960             | 2181 | 2226 | RTS_R4+_6  |
| TSS-FWD-13 | FWD    | 12123        | 627              | 729  | 743  | RTS_R4+_6  |
| TSS-FWD-14 | FWD    | 12159        | 140              | 189  | 192  | RTS_R4+_6  |
| TSS-FWD-15 | FWD    | 12142        | 2307             | 2833 | 2857 | RTS_R4+_6  |
| TSS-FWD-16 | FWD    | 14052        | 60               | 202  | 208  | RTS_R4+_7  |
| TSS-FWD-17 | FWD    | 15247        |                  | 17   | 17   | RTS_R4+_8  |
| TSS-FWD-18 | FWD    | 15253        | 1                | 15   | 15   | RTS_R4+_8  |
| TSS-FWD-19 | FWD    | 15276        | 5                | 12   | 12   | RTS_R4+_8  |
| TSS-FWD-20 | FWD    | 15338        | 15               | 15   | 15   | RTS_R4+_8  |
| TSS-FWD-21 | FWD    | 16959        | 2                | 2    | 4    | RTS_R4+_9  |
| TSS-FWD-22 | FWD    | 17462        | 25               | 25   | 25   | RTS_R4+_10 |
| TSS-FWD-23 | FWD    | 19727        | 4                | 4    | 4    | RTS_R4+_11 |
| TSS-FWD-24 | FWD    | 19742        | 3                | 3    | 3    | RTS_R4+_11 |
| TSS-FWD-25 | FWD    | 20912        | 32               | 45   | 45   | RTS_R4+_12 |
| TSS-FWD-26 | FWD    | 21383        | 15               | 15   | 15   | RTS_R4+_13 |
| TSS-FWD-27 | FWD    | 21395        | 9                | 9    | 9    | RTS_R4+_13 |
| TSS-FWD-28 | FWD    | 24971        | 26               | 26   | 26   | RTS_R4+_14 |
| TSS-FWD-29 | FWD    | 25006        | 25               | 26   | 26   | RTS_R4+_14 |
| TSS-FWD-30 | FWD    | 25695        | 53               | 53   | 53   | RTS_R4+_15 |
| TSS-FWD-31 | FWD    | 25698        | 55               | 55   | 55   | RTS_R4+_15 |
| TSS-FWD-32 | FWD    | 25701        | 57               | 57   | 57   | RTS_R4+_15 |
| TSS-FWD-33 | FWD    | 25804        | 36               | 36   | 36   | RTS_R4+_15 |
| TSS-FWD-34 | FWD    | 28289        | 59               | 59   | 59   | RTS_R4+_16 |
| TSS-FWD-35 | FWD    | 28343        | 47               | 48   | 49   | RTS_R4+_16 |
| TSS-FWD-36 | FWD    | 29551        | 27               | 27   | 27   | RTS_R4+_17 |
| TSS-FWD-37 | FWD    | 29620        | 412              | 412  | 412  | RTS_R4+_17 |
| TSS-FWD-38 | FWD    | 29632        | 68               | 68   | 68   | RTS_R4+_17 |
| TSS-FWD-39 | FWD    | 34226        | 63               | 65   | 65   | RTS_R4+_18 |
| TSS-FWD-40 | FWD    | 34273        | 53               | 53   | 53   | RTS_R4+_18 |
| TSS-FWD-41 | FWD    | 47215        | 143              | 145  | 145  | RTS_R4+_19 |
| TSS-FWD-42 | FWD    | 49788        | 12               | 12   | 22   | RTS_R4+_20 |
| TSS-FWD-43 | FWD    | 49799        | 368              | 368  | 368  | RTS_R4+_20 |
| TSS-FWD-44 | FWD    | 57259        | 28               | 28   | 28   | RTS_R4+_21 |
| TSS-FWD-45 | FWD    | 57261        | 31               | 31   | 31   | RTS_R4+_21 |
| TSS-FWD-46 | FWD    | 58946        | 178              | 178  | 178  | RTS_R4+_22 |
| TSS-FWD-47 | FWD    | 70221        | 82               | 89   | 92   | RTS_R4+_23 |
| TSS-FWD-48 | FWD    | 71240        | 20               | 20   | 20   | RTS_R4+_24 |
| TSS-FWD-49 | FWD    | 71271        | 13               | 13   | 17   | RTS_R4+_24 |
| TSS-FWD-50 | FWD    | 77357        | 13               | 13   | 13   | RTS_R4+_25 |
| TSS-FWD-51 | FWD    | 77367        | 6                | 10   | 11   | RTS_R4+_25 |
| TSS-FWD-52 | FWD    | 84298        | 21               | 22   | 22   | RTS_R4+_26 |
| TSS-FWD-53 | FWD    | 84307        | 29               | 30   | 30   | RTS_R4+_26 |
| TSS-FWD-54 | FWD    | 85599        | 10               | 10   | 10   | RTS_R4+_27 |
| TSS-FWD-55 | FWD    | 85604        | 12               | 12   | 13   | RTS_R4+_27 |
| TSS-FWD-56 | FWD    | 87837        | 37               | 37   | 37   | RTS_R4+_28 |
| TSS-FWD-57 | FWD    | 87868        | 40               | 40   | 40   | RTS_R4+_28 |
| TSS-FWD-58 | FWD    | 87969        | 37               | 37   | 38   | RTS_R4+_28 |

|             |     |        |      |      |      |            |
|-------------|-----|--------|------|------|------|------------|
| TSS-FWD-59  | FWD | 89589  | 792  | 802  | 820  | RTS_R4+_29 |
| TSS-FWD-60  | FWD | 89954  | 86   | 86   | 86   | RTS_R4+_30 |
| TSS-FWD-61  | FWD | 90014  | 11   | 11   | 11   | RTS_R4+_30 |
| TSS-FWD-62  | FWD | 90327  | 252  | 253  | 254  | RTS_R4+_31 |
| TSS-FWD-63  | FWD | 90682  | 91   | 91   | 92   | RTS_R4+_32 |
| TSS-FWD-64  | FWD | 91028  | 4    | 16   | 27   | RTS_R4+_32 |
| TSS-FWD-65  | FWD | 93137  | 87   | 87   | 90   | RTS_R4+_33 |
| TSS-FWD-66  | FWD | 93145  | 63   | 63   | 64   | RTS_R4+_33 |
| TSS-FWD-67  | FWD | 100740 | 198  | 198  | 198  | RTS_R4+_34 |
| TSS-FWD-68  | FWD | 100750 | 80   | 80   | 81   | RTS_R4+_34 |
| TSS-FWD-69  | FWD | 102763 | 141  | 141  | 141  | RTS_R4+_35 |
| TSS-FWD-70  | FWD | 104560 | 190  | 212  | 236  | RTS_R4+_36 |
| TSS-FWD-71  | FWD | 106507 | 188  | 208  | 210  | RTS_R4+_37 |
| TSS-FWD-72  | FWD | 106519 | 51   | 53   | 53   | RTS_R4+_37 |
| TSS-FWD-73  | FWD | 106530 | 24   | 33   | 54   | RTS_R4+_37 |
| TSS-FWD-74  | FWD | 107561 | 18   | 18   | 18   | RTS_R4+_38 |
| TSS-FWD-75  | FWD | 107977 | 180  | 180  | 180  | RTS_R4+_39 |
| TSS-FWD-76  | FWD | 108025 | 357  | 359  | 359  | RTS_R4+_39 |
| TSS-FWD-77  | FWD | 108119 | 123  | 123  | 123  | RTS_R4+_39 |
| TSS-FWD-78  | FWD | 108132 | 118  | 118  | 118  | RTS_R4+_39 |
| TSS-FWD-79  | FWD | 113396 | 99   | 99   | 99   | RTS_R4+_40 |
| TSS-FWD-80  | FWD | 113415 | 40   | 40   | 40   | RTS_R4+_40 |
| TSS-FWD-81  | FWD | 113436 | 47   | 48   | 48   | RTS_R4+_40 |
| TSS-FWD-82  | FWD | 118701 | 3    | 3    | 3    | RTS_R4+_41 |
| TSS-FWD-83  | FWD | 118918 | 5    | 5    | 5    | RTS_R4+_41 |
| TSS-FWD-84  | FWD | 122034 | 157  | 159  | 162  | RTS_R4+_42 |
| TSS-FWD-85  | FWD | 122852 | 249  | 251  | 251  | RTS_R4+_43 |
| TSS-FWD-86  | FWD | 122860 | 141  | 145  | 145  | RTS_R4+_43 |
| TSS-FWD-87  | FWD | 122969 | 2899 | 2904 | 2905 | RTS_R4+_43 |
| TSS-FWD-88  | FWD | 122975 | 119  | 119  | 119  | RTS_R4+_43 |
| TSS-FWD-89  | FWD | 122985 | 234  | 234  | 234  | RTS_R4+_43 |
| TSS-FWD-90  | FWD | 122992 | 126  | 126  | 126  | RTS_R4+_43 |
| TSS-FWD-91  | FWD | 123003 | 118  | 118  | 118  | RTS_R4+_43 |
| TSS-FWD-92  | FWD | 127700 | 167  | 167  | 167  | RTS_R4+_44 |
| TSS-FWD-93  | FWD | 127717 | 658  | 658  | 658  | RTS_R4+_44 |
| TSS-FWD-94  | FWD | 129500 | 2    | 2    | 2    | RTS_R4+_45 |
| TSS-FWD-95  | FWD | 130202 |      |      | 1    | RTS_R4+_46 |
| TSS-FWD-96  | FWD | 131519 | 33   | 34   | 34   | RTS_R4+_47 |
| TSS-FWD-97  | FWD | 131743 | 96   | 96   | 96   | RTS_R4+_47 |
| TSS-FWD-98  | FWD | 134339 | 182  | 186  | 216  | RTS_R4+_48 |
| TSS-FWD-99  | FWD | 137044 | 169  | 169  | 169  | RTS_R4+_49 |
| TSS-FWD-100 | FWD | 137049 | 103  | 104  | 104  | RTS_R4+_49 |
| TSS-FWD-101 | FWD | 141360 | 71   | 71   | 72   | RTS_R4+_50 |
| TSS-FWD-102 | FWD | 141407 | 107  | 107  | 109  | RTS_R4+_50 |
| TSS-FWD-103 | FWD | 142733 | 13   | 14   | 14   | RTS_R4+_51 |
| TSS-FWD-104 | FWD | 145108 | 1    | 1    | 1    | RTS_R4+_52 |
| TSS-FWD-105 | FWD | 147583 | 14   | 15   | 15   | RTS_R4+_53 |
| TSS-FWD-106 | FWD | 147647 | 12   | 12   | 12   | RTS_R4+_53 |
| TSS-FWD-107 | FWD | 162077 | 118  | 121  | 123  | RTS_R4+_54 |
| TSS-FWD-108 | FWD | 164648 | 52   | 53   | 53   | RTS_R4+_55 |
| TSS-FWD-109 | FWD | 164658 | 539  | 567  | 569  | RTS_R4+_55 |
| TSS-FWD-110 | FWD | 167427 | 149  | 149  | 149  | RTS_R4+_56 |
| TSS-FWD-111 | FWD | 167443 | 51   | 51   | 51   | RTS_R4+_56 |
| TSS-FWD-112 | FWD | 169728 | 181  | 181  | 181  | RTS_R4+_57 |
| TSS-FWD-113 | FWD | 169733 | 127  | 127  | 127  | RTS_R4+_57 |
| TSS-FWD-114 | FWD | 174931 | 248  | 248  | 252  | RTS_R4+_58 |
| TSS-FWD-115 | FWD | 174975 | 61   | 61   | 66   | RTS_R4+_58 |
| TSS-FWD-116 | FWD | 175009 | 20   | 24   | 31   | RTS_R4+_58 |
| TSS-FWD-117 | FWD | 175074 | 31   | 37   | 39   | RTS_R4+_58 |
| TSS-FWD-118 | FWD | 176558 | 1804 | 1808 | 1843 | RTS_R4+_59 |
| TSS-FWD-119 | FWD | 176561 | 453  | 453  | 457  | RTS_R4+_59 |
| TSS-FWD-120 | FWD | 176583 | 34   | 35   | 35   | RTS_R4+_59 |
| TSS-FWD-121 | FWD | 176592 | 82   | 82   | 94   | RTS_R4+_59 |

|             |     |        |      |      |      |            |
|-------------|-----|--------|------|------|------|------------|
| TSS-FWD-122 | FWD | 179264 | 2    | 2    | 2    | RTS_R4+_60 |
| TSS-FWD-123 | FWD | 180852 | 57   | 78   | 78   | RTS_R4+_61 |
| TSS-FWD-124 | FWD | 180859 | 43   | 45   | 46   | RTS_R4+_61 |
| TSS-FWD-125 | FWD | 186142 | 22   | 22   | 22   | RTS_R4+_62 |
| TSS-FWD-126 | FWD | 189639 | 53   | 54   | 56   | RTS_R4+_63 |
| TSS-FWD-127 | FWD | 189842 | 35   | 35   | 35   | RTS_R4+_64 |
| TSS-FWD-128 | FWD | 189866 | 132  | 136  | 136  | RTS_R4+_64 |
| TSS-FWD-129 | FWD | 191754 | 728  | 730  | 730  | RTS_R4+_65 |
| TSS-FWD-130 | FWD | 191812 | 173  | 180  | 184  | RTS_R4+_65 |
| TSS-FWD-131 | FWD | 191820 | 191  | 213  | 218  | RTS_R4+_65 |
| TSS-FWD-132 | FWD | 192617 | 3139 | 3143 | 3145 | RTS_R4+_66 |
| TSS-FWD-133 | FWD | 192666 | 48   | 48   | 48   | RTS_R4+_66 |
| TSS-FWD-134 | FWD | 192790 | 113  | 116  | 116  | RTS_R4+_66 |
| TSS-FWD-135 | FWD | 192797 | 56   | 56   | 57   | RTS_R4+_66 |
| TSS-FWD-136 | FWD | 192814 | 250  | 277  | 407  | RTS_R4+_66 |
| TSS-FWD-137 | FWD | 192854 | 362  | 368  | 368  | RTS_R4+_66 |
| TSS-FWD-138 | FWD | 192863 | 180  | 195  | 198  | RTS_R4+_66 |
| TSS-FWD-139 | FWD | 194843 | 25   | 25   | 25   | RTS_R4+_67 |
| TSS-FWD-140 | FWD | 196415 | 45   | 45   | 45   | RTS_R4+_68 |
| TSS-FWD-141 | FWD | 196429 | 27   | 27   | 27   | RTS_R4+_68 |
| TSS-FWD-142 | FWD | 197823 | 74   | 75   | 75   | RTS_R4+_69 |
| TSS-FWD-143 | FWD | 197883 | 337  | 337  | 337  | RTS_R4+_69 |
| TSS-FWD-144 | FWD | 200138 | 383  | 384  | 384  | RTS_R4+_70 |
| TSS-FWD-145 | FWD | 200212 | 442  | 444  | 444  | RTS_R4+_70 |
| TSS-FWD-146 | FWD | 200256 | 55   | 55   | 55   | RTS_R4+_70 |
| TSS-FWD-147 | FWD | 200299 | 377  | 380  | 380  | RTS_R4+_70 |
| TSS-FWD-148 | FWD | 200305 | 93   | 93   | 93   | RTS_R4+_70 |
| TSS-FWD-149 | FWD | 200317 | 142  | 142  | 142  | RTS_R4+_70 |
| TSS-FWD-150 | FWD | 200378 | 68   | 68   | 68   | RTS_R4+_70 |
| TSS-FWD-151 | FWD | 200387 | 60   | 60   | 60   | RTS_R4+_70 |
| TSS-FWD-152 | FWD | 200399 | 213  | 214  | 218  | RTS_R4+_70 |
| TSS-FWD-153 | FWD | 202019 | 921  | 928  | 928  | RTS_R4+_71 |
| TSS-FWD-154 | FWD | 202066 | 122  | 122  | 122  | RTS_R4+_71 |
| TSS-FWD-155 | FWD | 202074 | 217  | 217  | 217  | RTS_R4+_71 |
| TSS-FWD-156 | FWD | 202082 | 91   | 91   | 92   | RTS_R4+_71 |
| TSS-FWD-157 | FWD | 208412 | 217  | 221  | 221  | RTS_R4+_72 |
| TSS-FWD-158 | FWD | 209658 | 278  | 283  | 314  | RTS_R4+_73 |
| TSS-FWD-159 | FWD | 211858 | 38   | 38   | 38   | RTS_R4+_74 |
| TSS-FWD-160 | FWD | 214269 | 271  | 272  | 273  | RTS_R4+_75 |
| TSS-FWD-161 | FWD | 214284 | 58   | 58   | 58   | RTS_R4+_75 |
| TSS-FWD-162 | FWD | 215123 | 42   | 42   | 42   | RTS_R4+_76 |
| TSS-FWD-163 | FWD | 222806 | 36   | 36   | 36   | RTS_R4+_77 |
| TSS-FWD-164 | FWD | 223771 | 2093 | 2093 | 2094 | RTS_R4+_78 |
| TSS-FWD-165 | FWD | 225711 | 94   | 94   | 94   | RTS_R4+_79 |
| TSS-FWD-166 | FWD | 229134 | 385  | 386  | 386  | RTS_R4+_80 |
| TSS-FWD-167 | FWD | 231063 | 38   | 38   | 54   | RTS_R4+_81 |
| TSS-FWD-168 | FWD | 234785 | 198  | 198  | 198  | RTS_R4+_82 |
| TSS-FWD-169 | FWD | 236021 | 109  | 134  | 141  | RTS_R4+_83 |
| TSS-FWD-170 | FWD | 236861 | 104  | 115  | 118  | RTS_R4+_84 |
| TSS-FWD-171 | FWD | 240333 | 420  | 441  | 454  | RTS_R4+_85 |
| TSS-FWD-172 | FWD | 243512 | 102  | 104  | 105  | RTS_R4+_86 |
| TSS-FWD-173 | FWD | 243522 | 43   | 43   | 44   | RTS_R4+_86 |
| TSS-FWD-174 | FWD | 246656 | 2    | 2    | 2    | RTS_R4+_87 |
| TSS-FWD-175 | FWD | 248128 | 4    | 4    | 4    | RTS_R4+_88 |
| TSS-FWD-176 | FWD | 250492 | 1    | 1    | 2    | RTS_R4+_89 |
| TSS-FWD-177 | FWD | 250883 | 3    | 3    | 5    | RTS_R4+_90 |
| TSS-FWD-178 | FWD | 251969 | 3    | 5    | 5    | RTS_R4+_91 |
| TSS-FWD-179 | FWD | 253336 | 4    | 4    | 4    | RTS_R4+_92 |
| TSS-FWD-180 | FWD | 255918 | 147  | 149  | 149  | RTS_R4+_93 |
| TSS-FWD-181 | FWD | 255924 | 86   | 86   | 86   | RTS_R4+_93 |
| TSS-FWD-182 | FWD | 255936 | 104  | 104  | 104  | RTS_R4+_93 |
| TSS-FWD-183 | FWD | 256502 | 427  | 433  | 433  | RTS_R4+_94 |
| TSS-FWD-184 | FWD | 256509 | 162  | 187  | 192  | RTS_R4+_94 |

|             |     |        |     |     |     |             |
|-------------|-----|--------|-----|-----|-----|-------------|
| TSS-FWD-185 | FWD | 257810 | 450 | 452 | 456 | RTS_R4+_95  |
| TSS-FWD-186 | FWD | 259572 | 140 | 140 | 140 | RTS_R4+_96  |
| TSS-FWD-187 | FWD | 259576 | 159 | 161 | 161 | RTS_R4+_96  |
| TSS-FWD-188 | FWD | 259584 | 154 | 154 | 154 | RTS_R4+_96  |
| TSS-FWD-189 | FWD | 262064 | 35  | 35  | 35  | RTS_R4+_97  |
| TSS-FWD-190 | FWD | 262114 | 47  | 47  | 47  | RTS_R4+_97  |
| TSS-FWD-191 | FWD | 268350 | 7   | 7   | 7   | RTS_R4+_98  |
| TSS-FWD-192 | FWD | 269482 | 35  | 35  | 35  | RTS_R4+_99  |
| TSS-FWD-193 | FWD | 270974 | 5   | 6   | 6   | RTS_R4+_100 |
| TSS-FWD-194 | FWD | 270979 | 9   | 10  | 10  | RTS_R4+_100 |
| TSS-FWD-195 | FWD | 274508 | 17  | 26  | 30  | RTS_R4+_101 |
| TSS-FWD-196 | FWD | 289619 | 3   | 3   | 3   | RTS_R4+_103 |
| TSS-FWD-197 | FWD | 290751 | 7   | 7   | 7   | RTS_R4+_105 |
| TSS-FWD-198 | FWD | 294852 | 69  | 69  | 69  | RTS_R4+_106 |
| TSS-FWD-199 | FWD | 296384 | 37  | 37  | 37  | RTS_R4+_107 |
| TSS-FWD-200 | FWD | 302181 | 186 | 187 | 187 | RTS_R4+_108 |
| TSS-FWD-201 | FWD | 302183 | 150 | 150 | 150 | RTS_R4+_108 |
| TSS-FWD-202 | FWD | 312032 | 1   | 1   | 1   | RTS_R4+_109 |
| TSS-FWD-203 | FWD | 319342 | 17  | 17  | 17  | RTS_R4+_111 |
| TSS-FWD-204 | FWD | 319351 | 22  | 23  | 23  | RTS_R4+_111 |
| TSS-FWD-205 | FWD | 320708 | 6   | 6   | 6   | RTS_R4+_112 |
| TSS-FWD-206 | FWD | 328645 | 57  | 57  | 57  | RTS_R4+_113 |
| TSS-FWD-207 | FWD | 330428 | 7   | 7   | 7   | RTS_R4+_114 |
| TSS-FWD-208 | FWD | 331089 | 5   | 6   | 6   | RTS_R4+_115 |
| TSS-FWD-209 | FWD | 331266 | 8   | 8   | 8   | RTS_R4+_115 |
| TSS-FWD-210 | FWD | 331462 | 14  | 14  | 14  | RTS_R4+_115 |
| TSS-FWD-211 | FWD | 331470 | 9   | 9   | 9   | RTS_R4+_115 |
| TSS-FWD-212 | FWD | 334399 | 7   | 7   | 7   | RTS_R4+_116 |
| TSS-FWD-213 | FWD | 334470 | 2   | 3   | 4   | RTS_R4+_116 |
| TSS-FWD-214 | FWD | 339162 | 1   | 1   | 1   | RTS_R4+_117 |
| TSS-FWD-215 | FWD | 340325 | 9   | 10  | 10  | RTS_R4+_118 |
| TSS-FWD-216 | FWD | 342042 | 63  | 64  | 64  | RTS_R4+_119 |
| TSS-FWD-217 | FWD | 342062 | 192 | 193 | 194 | RTS_R4+_119 |
| TSS-FWD-218 | FWD | 342079 | 53  | 55  | 55  | RTS_R4+_119 |
| TSS-FWD-219 | FWD | 344602 | 16  | 22  | 22  | RTS_R4+_120 |
| TSS-FWD-220 | FWD | 345656 | 266 | 275 | 654 | RTS_R4+_121 |
| TSS-FWD-221 | FWD | 345664 | 12  | 12  | 49  | RTS_R4+_121 |
| TSS-FWD-222 | FWD | 345678 | 40  | 40  | 41  | RTS_R4+_121 |
| TSS-FWD-223 | FWD | 347871 |     |     | 6   | RTS_R4+_122 |
| TSS-FWD-224 | FWD | 354108 | 472 | 472 | 472 | RTS_R4+_123 |
| TSS-FWD-225 | FWD | 354119 | 42  | 42  | 42  | RTS_R4+_123 |
| TSS-FWD-226 | FWD | 357998 | 1   | 1   | 1   |             |
| TSS-FWD-227 | FWD | 367744 | 6   | 6   | 6   | RTS_R4+_124 |
| TSS-FWD-228 | FWD | 374107 | 2   | 2   | 12  | RTS_R4+_125 |
| TSS-FWD-229 | FWD | 375966 | 28  | 29  | 29  | RTS_R4+_126 |
| TSS-FWD-230 | FWD | 375971 | 35  | 35  | 35  | RTS_R4+_126 |
| TSS-FWD-231 | FWD | 382126 |     |     | 2   | RTS_R4+_128 |
| TSS-FWD-232 | FWD | 384430 | 5   | 5   | 5   | RTS_R4+_129 |
| TSS-FWD-233 | FWD | 389071 | 5   | 5   | 5   |             |
| TSS-FWD-234 | FWD | 395657 | 13  | 13  | 13  | RTS_R4+_131 |
| TSS-FWD-235 | FWD | 395704 | 11  | 11  | 12  | RTS_R4+_131 |
| TSS-FWD-236 | FWD | 395779 | 3   | 3   | 3   | RTS_R4+_131 |
| TSS-FWD-237 | FWD | 396858 | 50  | 50  | 50  | RTS_R4+_132 |
| TSS-FWD-238 | FWD | 398796 | 7   | 7   | 20  | RTS_R4+_133 |
| TSS-FWD-239 | FWD | 400543 | 142 | 147 | 148 | RTS_R4+_134 |
| TSS-FWD-240 | FWD | 400587 | 72  | 73  | 73  | RTS_R4+_134 |
| TSS-FWD-241 | FWD | 400875 | 52  | 52  | 52  | RTS_R4+_135 |
| TSS-FWD-242 | FWD | 400902 | 95  | 95  | 96  | RTS_R4+_135 |
| TSS-FWD-243 | FWD | 400916 | 170 | 172 | 172 | RTS_R4+_135 |
| TSS-FWD-244 | FWD | 402912 | 1   | 1   | 1   | RTS_R4+_136 |
| TSS-FWD-245 | FWD | 404965 | 15  | 15  | 15  | RTS_R4+_137 |
| TSS-FWD-246 | FWD | 405456 | 19  | 19  | 19  | RTS_R4+_138 |
| TSS-FWD-247 | FWD | 405502 | 26  | 26  | 26  | RTS_R4+_138 |

|             |     |        |      |      |      |             |
|-------------|-----|--------|------|------|------|-------------|
| TSS-FWD-248 | FWD | 406176 | 28   | 28   | 28   | RTS_R4+_139 |
| TSS-FWD-249 | FWD | 406399 | 47   | 52   | 66   | RTS_R4+_140 |
| TSS-FWD-250 | FWD | 407371 | 28   | 28   | 28   | RTS_R4+_141 |
| TSS-FWD-251 | FWD | 407685 | 11   | 11   | 11   | RTS_R4+_142 |
| TSS-FWD-252 | FWD | 409344 | 33   | 33   | 38   | RTS_R4+_143 |
| TSS-FWD-253 | FWD | 415429 | 8    | 11   | 11   | RTS_R4+_144 |
| TSS-FWD-254 | FWD | 416378 |      | 15   | 15   | RTS_R4+_145 |
| TSS-FWD-255 | FWD | 418645 | 41   | 41   | 41   | RTS_R4+_146 |
| TSS-FWD-256 | FWD | 418776 | 41   | 41   | 41   | RTS_R4+_146 |
| TSS-FWD-257 | FWD | 420146 | 22   | 22   | 22   | RTS_R4+_147 |
| TSS-FWD-258 | FWD | 421719 | 21   | 21   | 21   | RTS_R4+_148 |
| TSS-FWD-259 | FWD | 424209 | 211  | 211  | 211  | RTS_R4+_149 |
| TSS-FWD-260 | FWD | 425886 | 8    | 8    | 8    | RTS_R4+_150 |
| TSS-FWD-261 | FWD | 425978 | 9    | 10   | 10   | RTS_R4+_150 |
| TSS-FWD-262 | FWD | 426063 | 12   | 13   | 13   | RTS_R4+_150 |
| TSS-FWD-263 | FWD | 426165 | 12   | 12   | 12   | RTS_R4+_150 |
| TSS-FWD-264 | FWD | 426428 | 66   | 77   | 77   | RTS_R4+_151 |
| TSS-FWD-265 | FWD | 426439 | 523  | 531  | 533  | RTS_R4+_151 |
| TSS-FWD-266 | FWD | 426472 | 57   | 60   | 61   | RTS_R4+_151 |
| TSS-FWD-267 | FWD | 426798 | 33   | 33   | 33   | RTS_R4+_152 |
| TSS-FWD-268 | FWD | 426873 | 27   | 28   | 28   | RTS_R4+_152 |
| TSS-FWD-269 | FWD | 426882 | 30   | 30   | 30   | RTS_R4+_152 |
| TSS-FWD-270 | FWD | 426887 | 22   | 22   | 22   | RTS_R4+_152 |
| TSS-FWD-271 | FWD | 429809 | 35   | 35   | 35   | RTS_R4+_153 |
| TSS-FWD-272 | FWD | 432199 |      | 2    | 2    | RTS_R4+_154 |
| TSS-FWD-273 | FWD | 433735 | 990  | 1005 | 1005 | RTS_R4+_155 |
| TSS-FWD-274 | FWD | 433817 | 110  | 111  | 111  | RTS_R4+_155 |
| TSS-FWD-275 | FWD | 433820 | 171  | 175  | 175  | RTS_R4+_155 |
| TSS-FWD-276 | FWD | 433828 | 97   | 97   | 97   | RTS_R4+_155 |
| TSS-FWD-277 | FWD | 435808 | 31   | 31   | 31   | RTS_R4+_156 |
| TSS-FWD-278 | FWD | 437492 |      |      | 4    | RTS_R4+_157 |
| TSS-FWD-279 | FWD | 440693 | 55   | 55   | 56   | RTS_R4+_158 |
| TSS-FWD-280 | FWD | 443824 | 69   | 138  | 211  | RTS_R4+_159 |
| TSS-FWD-281 | FWD | 443852 | 279  | 283  | 283  | RTS_R4+_159 |
| TSS-FWD-282 | FWD | 443861 | 44   | 47   | 49   | RTS_R4+_159 |
| TSS-FWD-283 | FWD | 443882 | 619  | 621  | 622  | RTS_R4+_159 |
| TSS-FWD-284 | FWD | 443888 | 95   | 95   | 95   | RTS_R4+_159 |
| TSS-FWD-285 | FWD | 453575 | 7    | 9    | 9    | RTS_R4+_160 |
| TSS-FWD-286 | FWD | 453607 | 70   | 73   | 73   | RTS_R4+_160 |
| TSS-FWD-287 | FWD | 453649 | 59   | 97   | 98   | RTS_R4+_160 |
| TSS-FWD-288 | FWD | 453658 | 364  | 601  | 1006 | RTS_R4+_160 |
| TSS-FWD-289 | FWD | 454217 | 504  | 504  | 504  | RTS_R4+_161 |
| TSS-FWD-290 | FWD | 454228 | 305  | 308  | 308  | RTS_R4+_161 |
| TSS-FWD-291 | FWD | 454331 | 19   | 19   | 19   | RTS_R4+_161 |
| TSS-FWD-292 | FWD | 455778 | 314  | 314  | 314  | RTS_R4+_162 |
| TSS-FWD-293 | FWD | 455801 | 166  | 168  | 184  | RTS_R4+_162 |
| TSS-FWD-294 | FWD | 455829 | 92   | 116  | 117  | RTS_R4+_162 |
| TSS-FWD-295 | FWD | 455867 | 107  | 107  | 107  | RTS_R4+_162 |
| TSS-FWD-296 | FWD | 455873 | 218  | 218  | 218  | RTS_R4+_162 |
| TSS-FWD-297 | FWD | 455882 | 80   | 83   | 84   | RTS_R4+_162 |
| TSS-FWD-298 | FWD | 457992 | 99   | 100  | 101  | RTS_R4+_163 |
| TSS-FWD-299 | FWD | 458039 | 3014 | 3017 | 3018 | RTS_R4+_163 |
| TSS-FWD-300 | FWD | 458090 | 96   | 101  | 101  | RTS_R4+_163 |
| TSS-FWD-301 | FWD | 459037 | 15   | 15   | 15   | RTS_R4+_164 |
| TSS-FWD-302 | FWD | 459330 | 13   | 15   | 15   | RTS_R4+_164 |
| TSS-FWD-303 | FWD | 459337 | 22   | 22   | 22   | RTS_R4+_164 |
| TSS-FWD-304 | FWD | 459339 | 22   | 22   | 22   | RTS_R4+_164 |
| TSS-FWD-305 | FWD | 460556 | 418  | 467  | 554  | RTS_R4+_165 |
| TSS-FWD-306 | FWD | 460615 | 446  | 449  | 455  | RTS_R4+_165 |
| TSS-FWD-307 | FWD | 460619 | 1565 | 1566 | 1568 | RTS_R4+_165 |
| TSS-FWD-308 | FWD | 460637 | 169  | 172  | 172  | RTS_R4+_165 |
| TSS-FWD-309 | FWD | 460655 | 234  | 235  | 235  | RTS_R4+_165 |
| TSS-FWD-310 | FWD | 461076 | 39   | 39   | 39   | RTS_R4+_166 |

|             |     |        |       |       |       |             |
|-------------|-----|--------|-------|-------|-------|-------------|
| TSS-FWD-311 | FWD | 466606 | 18    | 18    | 18    | RTS_R4+_167 |
| TSS-FWD-312 | FWD | 467581 | 68    | 68    | 69    | RTS_R4+_168 |
| TSS-FWD-313 | FWD | 471781 | 1     | 1     | 1     | RTS_R4+_170 |
| TSS-FWD-314 | FWD | 472073 | 9     | 9     | 9     | RTS_R4+_171 |
| TSS-FWD-315 | FWD | 474530 | 49    | 49    | 50    | RTS_R4+_172 |
| TSS-FWD-316 | FWD | 474538 | 393   | 393   | 398   | RTS_R4+_172 |
| TSS-FWD-317 | FWD | 475672 | 25327 | 35572 | 43361 | RTS_R4+_173 |
| TSS-FWD-318 | FWD | 475842 | 8     | 9     | 9     | RTS_R4+_174 |
| TSS-FWD-319 | FWD | 478077 | 7     | 7     | 7     | RTS_R4+_175 |
| TSS-FWD-320 | FWD | 484940 | 34    | 43    | 43    | RTS_R4+_176 |
| TSS-FWD-321 | FWD | 485713 | 30    | 30    | 30    | RTS_R4+_177 |
| TSS-FWD-322 | FWD | 490082 | 7     | 7     | 19    | RTS_R4+_178 |
| TSS-FWD-323 | FWD | 490534 | 109   | 109   | 109   | RTS_R4+_179 |
| TSS-FWD-324 | FWD | 491278 | 13    | 13    | 13    | RTS_R4+_180 |
| TSS-FWD-325 | FWD | 493133 | 103   | 103   | 103   | RTS_R4+_181 |
| TSS-FWD-326 | FWD | 493139 | 62    | 62    | 62    | RTS_R4+_181 |
| TSS-FWD-327 | FWD | 493170 | 58    | 58    | 58    | RTS_R4+_181 |
| TSS-FWD-328 | FWD | 493242 | 261   | 264   | 264   | RTS_R4+_181 |
| TSS-FWD-329 | FWD | 493275 | 92    | 92    | 92    | RTS_R4+_181 |
| TSS-FWD-330 | FWD | 494300 | 419   | 452   | 455   | RTS_R4+_182 |
| TSS-FWD-331 | FWD | 494306 | 2594  | 2745  | 2752  | RTS_R4+_182 |
| TSS-FWD-332 | FWD | 494314 | 1085  | 1296  | 1309  | RTS_R4+_182 |
| TSS-FWD-333 | FWD | 494328 | 26    | 56    | 56    | RTS_R4+_182 |
| TSS-FWD-334 | FWD | 496357 | 102   | 104   | 104   | RTS_R4+_183 |
| TSS-FWD-335 | FWD | 497255 | 83    | 87    | 90    | RTS_R4+_184 |
| TSS-FWD-336 | FWD | 499323 | 48    | 48    | 48    | RTS_R4+_185 |
| TSS-FWD-337 | FWD | 504107 | 42    | 43    | 45    | RTS_R4+_186 |
| TSS-FWD-338 | FWD | 504112 | 34    | 37    | 37    | RTS_R4+_186 |
| TSS-FWD-339 | FWD | 506428 | 205   | 271   | 376   | RTS_R4+_187 |
| TSS-FWD-340 | FWD | 507400 | 12    | 12    | 13    | RTS_R4+_188 |
| TSS-FWD-341 | FWD | 507406 | 9     | 9     | 9     | RTS_R4+_188 |
| TSS-FWD-342 | FWD | 510797 |       |       | 4     | RTS_R4+_189 |
| TSS-FWD-343 | FWD | 510827 | 5     | 5     | 5     | RTS_R4+_189 |
| TSS-FWD-344 | FWD | 513098 | 14    | 14    | 15    | RTS_R4+_190 |
| TSS-FWD-345 | FWD | 515116 | 129   | 131   | 132   | RTS_R4+_191 |
| TSS-FWD-346 | FWD | 518602 | 10    | 11    | 11    | RTS_R4+_192 |
| TSS-FWD-347 | FWD | 518895 | 21    | 28    | 28    | RTS_R4+_192 |
| TSS-FWD-348 | FWD | 522451 | 2     | 2     | 2     | RTS_R4+_193 |
| TSS-FWD-349 | FWD | 526780 | 9     | 9     | 9     | RTS_R4+_194 |
| TSS-FWD-350 | FWD | 531614 | 3     | 3     | 3     | RTS_R4+_195 |
| TSS-FWD-351 | FWD | 532189 | 15    | 20    | 20    | RTS_R4+_196 |
| TSS-FWD-352 | FWD | 532861 | 344   | 345   | 348   | RTS_R4+_197 |
| TSS-FWD-353 | FWD | 532866 | 407   | 411   | 463   | RTS_R4+_197 |
| TSS-FWD-354 | FWD | 534032 |       | 1     | 1     | RTS_R4+_198 |
| TSS-FWD-355 | FWD | 533001 | 1     | 13    | 28    |             |
| TSS-FWD-356 | FWD | 535605 | 4     | 4     | 4     |             |
| TSS-FWD-357 | FWD | 536895 | 1     | 1     | 1     |             |
| TSS-FWD-358 | FWD | 540988 | 6     | 6     | 6     | RTS_R4+_199 |
| TSS-FWD-359 | FWD | 553800 | 53    | 54    | 54    | RTS_R4+_200 |
| TSS-FWD-360 | FWD | 557392 | 2     | 2     | 2     |             |
| TSS-FWD-361 | FWD | 563958 |       | 43    | 77    | RTS_R4+_201 |
| TSS-FWD-362 | FWD | 563959 |       | 30    | 59    | RTS_R4+_201 |
| TSS-FWD-363 | FWD | 565404 | 3     | 3     | 3     |             |
| TSS-FWD-364 | FWD | 567514 | 120   | 120   | 121   | RTS_R4+_203 |
| TSS-FWD-365 | FWD | 570094 | 5     | 5     | 6     | RTS_R4+_204 |
| TSS-FWD-366 | FWD | 571542 |       | 4     | 5     |             |
| TSS-FWD-367 | FWD | 573132 | 5     | 5     | 5     |             |
| TSS-FWD-368 | FWD | 576081 | 21    | 22    | 37    | RTS_R4+_205 |
| TSS-FWD-369 | FWD | 576504 | 7     | 7     | 7     | RTS_R4+_206 |
| TSS-FWD-370 | FWD | 578930 | 5     | 5     | 5     | RTS_R4+_207 |
| TSS-FWD-371 | FWD | 579059 | 7     | 7     | 7     | RTS_R4+_207 |
| TSS-FWD-372 | FWD | 580819 | 1     | 1     | 1     | RTS_R4+_208 |
| TSS-FWD-373 | FWD | 594797 | 1     | 1     | 1     |             |

|             |     |        |      |      |      |             |
|-------------|-----|--------|------|------|------|-------------|
| TSS-FWD-374 | FWD | 596325 | 2    | 2    | 2    | RTS_R4+_211 |
| TSS-FWD-375 | FWD | 601152 | 27   | 27   | 27   | RTS_R4+_212 |
| TSS-FWD-376 | FWD | 607066 |      |      | 1    |             |
| TSS-FWD-377 | FWD | 607179 | 1    | 1    | 1    | RTS_R4+_213 |
| TSS-FWD-378 | FWD | 611909 | 24   | 24   | 26   | RTS_R4+_214 |
| TSS-FWD-379 | FWD | 617410 | 1    | 1    | 1    |             |
| TSS-FWD-380 | FWD | 621481 | 37   | 37   | 37   | RTS_R4+_215 |
| TSS-FWD-381 | FWD | 621483 | 50   | 50   | 50   | RTS_R4+_215 |
| TSS-FWD-382 | FWD | 624054 | 20   | 20   | 20   | RTS_R4+_216 |
| TSS-FWD-383 | FWD | 629079 | 53   | 55   | 222  | RTS_R4+_217 |
| TSS-FWD-384 | FWD | 629088 | 21   | 28   | 287  | RTS_R4+_217 |
| TSS-FWD-385 | FWD | 629096 | 6    | 7    | 69   | RTS_R4+_217 |
| TSS-FWD-386 | FWD | 632780 | 72   | 85   | 85   | RTS_R4+_218 |
| TSS-FWD-387 | FWD | 632789 | 30   | 46   | 47   | RTS_R4+_218 |
| TSS-FWD-388 | FWD | 638054 | 9795 | 9821 | 9823 | RTS_R4+_219 |
| TSS-FWD-389 | FWD | 638104 | 373  | 385  | 392  | RTS_R4+_219 |
| TSS-FWD-390 | FWD | 638130 | 325  | 335  | 338  | RTS_R4+_219 |
| TSS-FWD-391 | FWD | 638144 | 9395 | 9457 | 9461 | RTS_R4+_219 |
| TSS-FWD-392 | FWD | 638149 | 532  | 546  | 546  | RTS_R4+_219 |
| TSS-FWD-393 | FWD | 638189 | 116  | 116  | 116  | RTS_R4+_219 |
| TSS-FWD-394 | FWD | 638227 | 54   | 59   | 59   | RTS_R4+_219 |
| TSS-FWD-395 | FWD | 641285 | 4    | 4    | 4    | RTS_R4+_220 |
| TSS-FWD-396 | FWD | 651740 | 2    | 2    | 2    | RTS_R4+_221 |
| TSS-FWD-397 | FWD | 655710 | 2    | 2    | 2    | RTS_R4+_222 |
| TSS-FWD-398 | FWD | 655753 | 2    | 2    | 2    | RTS_R4+_222 |
| TSS-FWD-399 | FWD | 656473 | 58   | 132  | 741  | RTS_R4+_223 |
| TSS-FWD-400 | FWD | 657187 | 7    | 8    | 48   | RTS_R4+_224 |
| TSS-FWD-401 | FWD | 658045 | 4    | 4    | 5    | RTS_R4+_225 |
| TSS-FWD-402 | FWD | 663180 |      | 4    | 4    | RTS_R4+_226 |
| TSS-FWD-403 | FWD | 663285 |      | 2    | 6    | RTS_R4+_226 |
| TSS-FWD-404 | FWD | 674160 | 338  | 369  | 375  | RTS_R4+_227 |
| TSS-FWD-405 | FWD | 674216 | 213  | 249  | 430  | RTS_R4+_227 |
| TSS-FWD-406 | FWD | 678687 | 15   | 15   | 15   |             |
| TSS-FWD-407 | FWD | 694300 | 131  | 133  | 158  | RTS_R4+_228 |
| TSS-FWD-408 | FWD | 695655 |      |      | 2    | RTS_R4+_229 |
| TSS-FWD-409 | FWD | 702830 | 12   | 12   | 12   | RTS_R4+_230 |
| TSS-FWD-410 | FWD | 703063 | 53   | 58   | 80   | RTS_R4+_230 |
| TSS-FWD-411 | FWD | 705222 | 3    | 7    | 7    | RTS_R4+_231 |
| TSS-FWD-412 | FWD | 705283 | 466  | 466  | 466  | RTS_R4+_231 |
| TSS-FWD-413 | FWD | 705286 | 1365 | 1366 | 1366 | RTS_R4+_231 |
| TSS-FWD-414 | FWD | 705301 | 185  | 187  | 187  | RTS_R4+_231 |
| TSS-FWD-415 | FWD | 705309 | 112  | 114  | 114  | RTS_R4+_231 |
| TSS-FWD-416 | FWD | 707487 |      | 1    | 2    |             |
| TSS-FWD-417 | FWD | 707512 |      | 1    | 1    |             |
| TSS-FWD-418 | FWD | 710000 | 2    | 2    | 2    | RTS_R4+_232 |
| TSS-FWD-419 | FWD | 712074 | 296  | 298  | 298  | RTS_R4+_233 |
| TSS-FWD-420 | FWD | 712139 | 156  | 156  | 156  | RTS_R4+_233 |
| TSS-FWD-421 | FWD | 714596 | 18   | 18   | 18   |             |
| TSS-FWD-422 | FWD | 728295 | 697  | 891  | 909  | RTS_R4+_235 |
| TSS-FWD-423 | FWD | 728306 | 544  | 1317 | 1354 | RTS_R4+_235 |
| TSS-FWD-424 | FWD | 728311 | 151  | 994  | 1052 | RTS_R4+_235 |
| TSS-FWD-425 | FWD | 728572 | 7    | 7    | 7    | RTS_R4+_236 |
| TSS-FWD-426 | FWD | 733014 | 5    | 5    | 5    | RTS_R4+_237 |
| TSS-FWD-427 | FWD | 733048 | 3    | 3    | 3    | RTS_R4+_237 |
| TSS-FWD-428 | FWD | 734611 | 2    | 4    | 4    | RTS_R4+_238 |
| TSS-FWD-429 | FWD | 734641 | 2    | 3    | 3    | RTS_R4+_238 |
| TSS-FWD-430 | FWD | 737286 | 2    | 2    | 2    |             |
| TSS-FWD-431 | FWD | 738203 | 6    | 6    | 9    | RTS_R4+_239 |
| TSS-FWD-432 | FWD | 741851 | 18   | 18   | 18   | RTS_R4+_240 |
| TSS-FWD-433 | FWD | 742021 | 99   | 103  | 105  | RTS_R4+_240 |
| TSS-FWD-434 | FWD | 754178 | 55   | 55   | 64   | RTS_R4+_243 |
| TSS-FWD-435 | FWD | 754738 | 349  | 349  | 351  | RTS_R4+_244 |
| TSS-FWD-436 | FWD | 754745 | 386  | 386  | 394  | RTS_R4+_244 |

|             |     |        |      |      |      |             |
|-------------|-----|--------|------|------|------|-------------|
| TSS-FWD-437 | FWD | 757777 | 641  | 641  | 641  | RTS_R4+_245 |
| TSS-FWD-438 | FWD | 757802 | 351  | 351  | 352  | RTS_R4+_245 |
| TSS-FWD-439 | FWD | 757808 | 4025 | 4028 | 4032 | RTS_R4+_245 |
| TSS-FWD-440 | FWD | 765093 | 3    | 3    | 3    | RTS_R4+_246 |
| TSS-FWD-441 | FWD | 770474 | 11   | 14   | 23   | RTS_R4+_247 |
| TSS-FWD-442 | FWD | 770487 | 32   | 33   | 36   | RTS_R4+_247 |
| TSS-FWD-443 | FWD | 770517 | 27   | 27   | 27   | RTS_R4+_247 |
| TSS-FWD-444 | FWD | 770523 | 108  | 110  | 110  | RTS_R4+_247 |
| TSS-FWD-445 | FWD | 770603 | 52   | 53   | 53   | RTS_R4+_247 |
| TSS-FWD-446 | FWD | 773229 | 42   | 42   | 42   | RTS_R4+_248 |
| TSS-FWD-447 | FWD | 773934 | 124  | 125  | 125  | RTS_R4+_250 |
| TSS-FWD-448 | FWD | 776788 | 43   | 43   | 43   | RTS_R4+_251 |
| TSS-FWD-449 | FWD | 776892 | 36   | 36   | 36   | RTS_R4+_251 |
| TSS-FWD-450 | FWD | 776907 | 84   | 85   | 85   | RTS_R4+_251 |
| TSS-FWD-451 | FWD | 779735 | 1    | 57   | 57   | RTS_R4+_252 |
| TSS-FWD-452 | FWD | 780263 | 20   | 21   | 21   | RTS_R4+_253 |
| TSS-FWD-453 | FWD | 780570 | 26   | 26   | 26   | RTS_R4+_254 |
| TSS-FWD-454 | FWD | 781226 | 601  | 614  | 615  | RTS_R4+_255 |
| TSS-FWD-455 | FWD | 781237 | 271  | 284  | 285  | RTS_R4+_255 |
| TSS-FWD-456 | FWD | 781283 | 18   | 19   | 19   | RTS_R4+_255 |
| TSS-FWD-457 | FWD | 782246 | 14   | 14   | 14   | RTS_R4+_256 |
| TSS-FWD-458 | FWD | 782268 | 12   | 12   | 12   | RTS_R4+_256 |
| TSS-FWD-459 | FWD | 784815 | 3691 | 3696 | 3697 | RTS_R4+_257 |
| TSS-FWD-460 | FWD | 784821 | 2117 | 2121 | 2121 | RTS_R4+_257 |
| TSS-FWD-461 | FWD | 784826 | 219  | 220  | 220  | RTS_R4+_257 |
| TSS-FWD-462 | FWD | 784830 | 1203 | 1203 | 1203 | RTS_R4+_257 |
| TSS-FWD-463 | FWD | 786750 | 2    | 3    | 3    | RTS_R4+_258 |
| TSS-FWD-464 | FWD | 793974 | 145  | 145  | 150  | RTS_R4+_259 |
| TSS-FWD-465 | FWD | 794219 | 16   | 16   | 16   | RTS_R4+_260 |
| TSS-FWD-466 | FWD | 794285 | 20   | 21   | 21   | RTS_R4+_260 |
| TSS-FWD-467 | FWD | 797506 | 10   | 10   | 10   | RTS_R4+_261 |
| TSS-FWD-468 | FWD | 797668 | 24   | 24   | 24   | RTS_R4+_262 |
| TSS-FWD-469 | FWD | 797674 | 30   | 30   | 30   | RTS_R4+_262 |
| TSS-FWD-470 | FWD | 797680 | 19   | 19   | 19   | RTS_R4+_262 |
| TSS-FWD-471 | FWD | 797778 | 47   | 47   | 47   | RTS_R4+_262 |
| TSS-FWD-472 | FWD | 808524 | 165  | 172  | 172  | RTS_R4+_263 |
| TSS-FWD-473 | FWD | 808533 | 341  | 341  | 341  | RTS_R4+_263 |
| TSS-FWD-474 | FWD | 812660 | 24   | 24   | 24   | RTS_R4+_264 |
| TSS-FWD-475 | FWD | 816050 | 3    | 3    | 3    | RTS_R4+_265 |
| TSS-FWD-476 | FWD | 816137 | 97   | 107  | 125  | RTS_R4+_265 |
| TSS-FWD-477 | FWD | 817199 | 601  | 601  | 601  | RTS_R4+_266 |
| TSS-FWD-478 | FWD | 817207 | 95   | 95   | 95   | RTS_R4+_266 |
| TSS-FWD-479 | FWD | 817223 | 98   | 98   | 98   | RTS_R4+_266 |
| TSS-FWD-480 | FWD | 817235 | 650  | 655  | 656  | RTS_R4+_266 |
| TSS-FWD-481 | FWD | 819081 | 580  | 616  | 742  | RTS_R4+_267 |
| TSS-FWD-482 | FWD | 819090 | 25   | 27   | 42   | RTS_R4+_267 |
| TSS-FWD-483 | FWD | 823826 | 4    | 6    | 32   | RTS_R4+_269 |
| TSS-FWD-484 | FWD | 830008 | 20   | 20   | 20   | RTS_R4+_270 |
| TSS-FWD-485 | FWD | 832266 | 8    | 8    | 8    | RTS_R4+_271 |
| TSS-FWD-486 | FWD | 832278 | 11   | 11   | 11   | RTS_R4+_271 |
| TSS-FWD-487 | FWD | 834346 | 19   | 19   | 19   | RTS_R4+_272 |
| TSS-FWD-488 | FWD | 834393 | 13   | 13   | 13   | RTS_R4+_272 |
| TSS-FWD-489 | FWD | 834404 | 16   | 16   | 20   | RTS_R4+_272 |
| TSS-FWD-490 | FWD | 835541 | 456  | 456  | 457  | RTS_R4+_273 |
| TSS-FWD-491 | FWD | 837896 |      | 1    | 2    | RTS_R4+_274 |
| TSS-FWD-492 | FWD | 841376 | 2    | 2    | 2    | RTS_R4+_275 |
| TSS-FWD-493 | FWD | 841479 | 2    | 2    | 2    | RTS_R4+_275 |
| TSS-FWD-494 | FWD | 841538 | 1    | 2    | 2    | RTS_R4+_275 |
| TSS-FWD-495 | FWD | 849434 | 616  | 618  | 618  | RTS_R4+_276 |
| TSS-FWD-496 | FWD | 849446 | 390  | 396  | 396  | RTS_R4+_276 |
| TSS-FWD-497 | FWD | 849536 | 55   | 58   | 59   | RTS_R4+_276 |
| TSS-FWD-498 | FWD | 849610 | 137  | 152  | 154  | RTS_R4+_276 |
| TSS-FWD-499 | FWD | 849622 | 61   | 69   | 69   | RTS_R4+_276 |



|             |     |        |      |      |      |             |
|-------------|-----|--------|------|------|------|-------------|
| TSS-FWD-500 | FWD | 849628 | 76   | 79   | 79   | RTS_R4+_276 |
| TSS-FWD-501 | FWD | 849640 | 1133 | 1139 | 1175 | RTS_R4+_276 |
| TSS-FWD-502 | FWD | 849646 | 513  | 514  | 516  | RTS_R4+_276 |
| TSS-FWD-503 | FWD | 852360 | 92   | 93   | 98   | RTS_R4+_277 |
| TSS-FWD-504 | FWD | 855156 | 92   | 92   | 92   | RTS_R4+_278 |
| TSS-FWD-505 | FWD | 859050 | 8    | 8    | 8    | RTS_R4+_279 |
| TSS-FWD-506 | FWD | 859134 | 9    | 9    | 9    | RTS_R4+_279 |
| TSS-FWD-507 | FWD | 862837 | 55   | 57   | 57   | RTS_R4+_280 |
| TSS-FWD-508 | FWD | 865760 | 121  | 121  | 121  | RTS_R4+_281 |
| TSS-FWD-509 | FWD | 870904 | 48   | 48   | 48   | RTS_R4+_282 |
| TSS-FWD-510 | FWD | 870945 | 65   | 65   | 65   | RTS_R4+_282 |
| TSS-FWD-511 | FWD | 872121 | 35   | 35   | 35   | RTS_R4+_283 |
| TSS-FWD-512 | FWD | 872128 | 32   | 32   | 32   | RTS_R4+_283 |
| TSS-FWD-513 | FWD | 872170 | 38   | 38   | 38   | RTS_R4+_283 |
| TSS-FWD-514 | FWD | 872180 | 25   | 25   | 25   | RTS_R4+_283 |
| TSS-FWD-515 | FWD | 877440 | 2    | 32   | 122  | RTS_R4+_284 |
| TSS-FWD-516 | FWD | 877945 | 37   | 38   | 38   | RTS_R4+_285 |
| TSS-FWD-517 | FWD | 879841 | 80   | 81   | 84   | RTS_R4+_286 |
| TSS-FWD-518 | FWD | 879851 | 48   | 49   | 58   | RTS_R4+_286 |
| TSS-FWD-519 | FWD | 879858 | 273  | 274  | 282  | RTS_R4+_286 |
| TSS-FWD-520 | FWD | 879868 | 92   | 93   | 95   | RTS_R4+_286 |
| TSS-FWD-521 | FWD | 879918 | 43   | 49   | 53   | RTS_R4+_286 |
| TSS-FWD-522 | FWD | 882793 | 5    | 5    | 10   | RTS_R4+_287 |
| TSS-FWD-523 | FWD | 882872 | 1    | 1    | 1    | RTS_R4+_287 |
| TSS-FWD-524 | FWD | 886624 | 21   | 21   | 22   | RTS_R4+_288 |
| TSS-FWD-525 | FWD | 889111 | 21   | 21   | 21   | RTS_R4+_289 |
| TSS-FWD-526 | FWD | 890086 | 27   | 30   | 31   | RTS_R4+_290 |
| TSS-FWD-527 | FWD | 891082 | 12   | 12   | 12   | RTS_R4+_291 |
| TSS-FWD-528 | FWD | 892149 | 43   | 43   | 43   | RTS_R4+_292 |
| TSS-FWD-529 | FWD | 892867 | 13   | 13   | 13   | RTS_R4+_293 |
| TSS-FWD-530 | FWD | 897617 | 7    | 7    | 7    | RTS_R4+_295 |
| TSS-FWD-531 | FWD | 903740 | 175  | 187  | 212  | RTS_R4+_296 |
| TSS-FWD-532 | FWD | 903746 | 225  | 248  | 288  | RTS_R4+_296 |
| TSS-FWD-533 | FWD | 903754 | 880  | 966  | 1007 | RTS_R4+_296 |
| TSS-FWD-534 | FWD | 903762 | 38   | 51   | 67   | RTS_R4+_296 |
| TSS-FWD-535 | FWD | 903777 | 33   | 45   | 87   | RTS_R4+_296 |
| TSS-FWD-536 | FWD | 903793 | 29   | 38   | 51   | RTS_R4+_296 |
| TSS-FWD-537 | FWD | 905279 |      | 1    | 1    | RTS_R4+_297 |
| TSS-FWD-538 | FWD | 913951 | 13   | 13   | 13   | RTS_R4+_298 |
| TSS-FWD-539 | FWD | 915532 | 44   | 44   | 44   | RTS_R4+_299 |
| TSS-FWD-540 | FWD | 918360 | 136  | 136  | 136  | RTS_R4+_300 |
| TSS-FWD-541 | FWD | 918396 | 52   | 52   | 52   | RTS_R4+_300 |
| TSS-FWD-542 | FWD | 921139 | 1    | 103  | 108  | RTS_R4+_301 |
| TSS-FWD-543 | FWD | 921194 | 27   | 55   | 55   | RTS_R4+_301 |
| TSS-FWD-544 | FWD | 922282 | 31   | 64   | 64   | RTS_R4+_302 |
| TSS-FWD-545 | FWD | 922314 | 455  | 485  | 502  | RTS_R4+_302 |
| TSS-FWD-546 | FWD | 922434 | 1129 | 1616 | 1831 | RTS_R4+_302 |
| TSS-FWD-547 | FWD | 931551 | 30   | 30   | 30   | RTS_R4+_303 |
| TSS-FWD-548 | FWD | 931654 | 62   | 62   | 63   | RTS_R4+_303 |
| TSS-FWD-549 | FWD | 931799 | 131  | 132  | 132  | RTS_R4+_303 |
| TSS-FWD-550 | FWD | 932358 | 16   | 16   | 18   | RTS_R4+_304 |
| TSS-FWD-551 | FWD | 932404 | 12   | 12   | 13   | RTS_R4+_304 |
| TSS-FWD-552 | FWD | 936440 | 24   | 24   | 24   | RTS_R4+_305 |
| TSS-FWD-553 | FWD | 936511 | 19   | 19   | 19   | RTS_R4+_305 |
| TSS-FWD-554 | FWD | 936551 | 18   | 18   | 18   | RTS_R4+_305 |
| TSS-FWD-555 | FWD | 938576 | 12   | 14   | 14   | RTS_R4+_306 |
| TSS-FWD-556 | FWD | 938624 | 20   | 20   | 21   | RTS_R4+_306 |
| TSS-FWD-557 | FWD | 938645 | 21   | 22   | 23   | RTS_R4+_306 |
| TSS-FWD-558 | FWD | 940046 |      | 4    | 4    | RTS_R4+_307 |
| TSS-FWD-559 | FWD | 940082 | 4    | 4    | 4    | RTS_R4+_307 |
| TSS-FWD-560 | FWD | 945064 | 4    | 5    | 5    | RTS_R4+_308 |
| TSS-FWD-561 | FWD | 946043 | 15   | 15   | 15   | RTS_R4+_309 |
| TSS-FWD-562 | FWD | 946080 | 16   | 16   | 16   | RTS_R4+_309 |

|             |     |         |       |       |       |             |
|-------------|-----|---------|-------|-------|-------|-------------|
| TSS-FWD-563 | FWD | 948867  | 108   | 110   | 110   | RTS_R4+_310 |
| TSS-FWD-564 | FWD | 955897  | 2     | 2     | 2     | RTS_R4+_311 |
| TSS-FWD-565 | FWD | 956802  | 152   | 169   | 170   | RTS_R4+_312 |
| TSS-FWD-566 | FWD | 956808  | 235   | 235   | 235   | RTS_R4+_312 |
| TSS-FWD-567 | FWD | 959494  | 4     | 4     | 4     | RTS_R4+_313 |
| TSS-FWD-568 | FWD | 960303  | 5     | 5     | 8     | RTS_R4+_314 |
| TSS-FWD-569 | FWD | 960386  | 10    | 10    | 10    | RTS_R4+_314 |
| TSS-FWD-570 | FWD | 960408  | 6     | 6     | 6     | RTS_R4+_314 |
| TSS-FWD-571 | FWD | 960944  | 126   | 126   | 126   | RTS_R4+_315 |
| TSS-FWD-572 | FWD | 961060  | 41    | 41    | 41    | RTS_R4+_315 |
| TSS-FWD-573 | FWD | 961116  | 20215 | 20244 | 20275 | RTS_R4+_315 |
| TSS-FWD-574 | FWD | 962867  | 33    | 41    | 52    | RTS_R4+_316 |
| TSS-FWD-575 | FWD | 963495  | 5     | 5     | 5     | RTS_R4+_317 |
| TSS-FWD-576 | FWD | 965817  | 32    | 32    | 32    | RTS_R4+_318 |
| TSS-FWD-577 | FWD | 969867  | 469   | 472   | 476   | RTS_R4+_319 |
| TSS-FWD-578 | FWD | 970942  | 16    | 16    | 16    | RTS_R4+_320 |
| TSS-FWD-579 | FWD | 972720  | 12    | 12    | 12    | RTS_R4+_321 |
| TSS-FWD-580 | FWD | 980154  |       | 2     | 4     | RTS_R4+_322 |
| TSS-FWD-581 | FWD | 980247  | 15    | 15    | 15    | RTS_R4+_322 |
| TSS-FWD-582 | FWD | 982054  | 18    | 20    | 28    | RTS_R4+_323 |
| TSS-FWD-583 | FWD | 982102  | 34    | 36    | 39    | RTS_R4+_323 |
| TSS-FWD-584 | FWD | 982798  | 223   | 232   | 234   | RTS_R4+_324 |
| TSS-FWD-585 | FWD | 985190  | 1     | 4     | 4     | RTS_R4+_325 |
| TSS-FWD-586 | FWD | 986622  | 5     | 5     | 9     | RTS_R4+_326 |
| TSS-FWD-587 | FWD | 989737  | 61    | 61    | 61    | RTS_R4+_327 |
| TSS-FWD-588 | FWD | 989749  | 44    | 44    | 44    | RTS_R4+_327 |
| TSS-FWD-589 | FWD | 989815  | 122   | 122   | 125   | RTS_R4+_327 |
| TSS-FWD-590 | FWD | 1003961 | 55    | 55    | 55    | RTS_R4+_328 |
| TSS-FWD-591 | FWD | 1005076 | 75    | 76    | 77    | RTS_R4+_329 |
| TSS-FWD-592 | FWD | 1006895 | 51    | 52    | 52    | RTS_R4+_330 |
| TSS-FWD-593 | FWD | 1006926 | 74    | 74    | 74    | RTS_R4+_330 |
| TSS-FWD-594 | FWD | 1006929 | 114   | 114   | 114   | RTS_R4+_330 |
| TSS-FWD-595 | FWD | 1007025 | 66    | 66    | 66    | RTS_R4+_330 |
| TSS-FWD-596 | FWD | 1010883 | 14    | 14    | 14    | RTS_R4+_331 |
| TSS-FWD-597 | FWD | 1010988 | 13    | 13    | 13    | RTS_R4+_331 |
| TSS-FWD-598 | FWD | 1014873 | 6     | 74    | 218   | RTS_R4+_332 |
| TSS-FWD-599 | FWD | 1014882 | 1     | 7     | 31    | RTS_R4+_332 |
| TSS-FWD-600 | FWD | 1014905 | 61    | 61    | 61    | RTS_R4+_332 |
| TSS-FWD-601 | FWD | 1017682 | 153   | 156   | 160   | RTS_R4+_333 |
| TSS-FWD-602 | FWD | 1019566 | 6     | 6     | 6     | RTS_R4+_334 |
| TSS-FWD-603 | FWD | 1020306 | 10    | 10    | 10    | RTS_R4+_335 |
| TSS-FWD-604 | FWD | 1023665 | 28    | 28    | 28    | RTS_R4+_336 |
| TSS-FWD-605 | FWD | 1027106 | 20    | 21    | 25    | RTS_R4+_337 |
| TSS-FWD-606 | FWD | 1027150 | 85    | 88    | 111   | RTS_R4+_337 |
| TSS-FWD-607 | FWD | 1029195 | 14    | 15    | 15    | RTS_R4+_338 |
| TSS-FWD-608 | FWD | 1029201 | 11    | 13    | 25    | RTS_R4+_338 |
| TSS-FWD-609 | FWD | 1030656 |       |       | 1     | RTS_R4+_339 |
| TSS-FWD-610 | FWD | 1031208 | 6     | 6     | 6     | RTS_R4+_340 |
| TSS-FWD-611 | FWD | 1036930 | 6     | 6     | 6     | RTS_R4+_341 |
| TSS-FWD-612 | FWD | 1039819 |       |       | 1     | RTS_R4+_342 |
| TSS-FWD-613 | FWD | 1049039 | 4     | 4     | 4     | RTS_R4+_343 |
| TSS-FWD-614 | FWD | 1050625 | 6     | 6     | 6     |             |
| TSS-FWD-615 | FWD | 1051218 | 24    | 28    | 28    | RTS_R4+_344 |
| TSS-FWD-616 | FWD | 1057130 | 2     | 2     | 2     | RTS_R4+_346 |
| TSS-FWD-617 | FWD | 1060747 |       | 1     | 1     | RTS_R4+_347 |
| TSS-FWD-618 | FWD | 1063246 |       | 2     | 2     |             |
| TSS-FWD-619 | FWD | 1064782 | 79    | 81    | 99    | RTS_R4+_348 |
| TSS-FWD-620 | FWD | 1067262 | 1     | 1     | 1     | RTS_R4+_349 |
| TSS-FWD-621 | FWD | 1073321 | 5     | 5     | 5     | RTS_R4+_350 |
| TSS-FWD-622 | FWD | 1073443 | 91    | 92    | 92    | RTS_R4+_350 |
| TSS-FWD-623 | FWD | 1078392 | 16    | 16    | 16    | RTS_R4+_351 |
| TSS-FWD-624 | FWD | 1078447 | 24    | 24    | 24    | RTS_R4+_351 |
| TSS-FWD-625 | FWD | 1078512 | 11    | 12    | 12    | RTS_R4+_351 |

|             |     |         |      |      |      |             |
|-------------|-----|---------|------|------|------|-------------|
| TSS-FWD-626 | FWD | 1080520 | 53   | 53   | 54   | RTS_R4+_352 |
| TSS-FWD-627 | FWD | 1080533 | 39   | 39   | 39   | RTS_R4+_352 |
| TSS-FWD-628 | FWD | 1084120 | 18   | 18   | 18   | RTS_R4+_353 |
| TSS-FWD-629 | FWD | 1084166 | 52   | 52   | 54   | RTS_R4+_353 |
| TSS-FWD-630 | FWD | 1092062 | 5    | 5    | 7    | RTS_R4+_354 |
| TSS-FWD-631 | FWD | 1092067 | 5    | 5    | 5    | RTS_R4+_354 |
| TSS-FWD-632 | FWD | 1093229 | 1    | 1    | 1    | RTS_R4+_355 |
| TSS-FWD-633 | FWD | 1096981 | 41   | 41   | 41   | RTS_R4+_356 |
| TSS-FWD-634 | FWD | 1096990 | 36   | 36   | 36   | RTS_R4+_356 |
| TSS-FWD-635 | FWD | 1097010 | 262  | 265  | 265  | RTS_R4+_356 |
| TSS-FWD-636 | FWD | 1097049 | 664  | 697  | 698  | RTS_R4+_356 |
| TSS-FWD-637 | FWD | 1097057 | 63   | 64   | 64   | RTS_R4+_356 |
| TSS-FWD-638 | FWD | 1098081 | 128  | 128  | 128  | RTS_R4+_357 |
| TSS-FWD-639 | FWD | 1099336 | 27   | 27   | 27   | RTS_R4+_358 |
| TSS-FWD-640 | FWD | 1099405 | 20   | 20   | 20   | RTS_R4+_358 |
| TSS-FWD-641 | FWD | 1103559 | 25   | 25   | 25   | RTS_R4+_359 |
| TSS-FWD-642 | FWD | 1105020 | 34   | 35   | 36   | RTS_R4+_360 |
| TSS-FWD-643 | FWD | 1108478 | 45   | 47   | 47   | RTS_R4+_361 |
| TSS-FWD-644 | FWD | 1108501 | 144  | 144  | 144  | RTS_R4+_361 |
| TSS-FWD-645 | FWD | 1115959 | 32   | 32   | 32   | RTS_R4+_362 |
| TSS-FWD-646 | FWD | 1115994 | 681  | 681  | 681  | RTS_R4+_362 |
| TSS-FWD-647 | FWD | 1124698 | 57   | 57   | 57   | RTS_R4+_363 |
| TSS-FWD-648 | FWD | 1124706 | 74   | 74   | 74   | RTS_R4+_363 |
| TSS-FWD-649 | FWD | 1127058 |      |      | 1    | RTS_R4+_364 |
| TSS-FWD-650 | FWD | 1130215 | 169  | 169  | 169  |             |
| TSS-FWD-651 | FWD | 1130271 | 42   | 42   | 42   |             |
| TSS-FWD-652 | FWD | 1133923 | 54   | 54   | 54   |             |
| TSS-FWD-653 | FWD | 1137576 | 92   | 92   | 92   | RTS_R4+_365 |
| TSS-FWD-654 | FWD | 1144163 | 259  | 259  | 259  | RTS_R4+_366 |
| TSS-FWD-655 | FWD | 1145813 | 42   | 42   | 48   | RTS_R4+_367 |
| TSS-FWD-656 | FWD | 1145871 | 248  | 249  | 249  | RTS_R4+_368 |
| TSS-FWD-657 | FWD | 1145942 | 582  | 586  | 596  | RTS_R4+_368 |
| TSS-FWD-658 | FWD | 1146015 | 473  | 474  | 474  | RTS_R4+_368 |
| TSS-FWD-659 | FWD | 1146523 | 6448 | 6487 | 6489 | RTS_R4+_369 |
| TSS-FWD-660 | FWD | 1146530 | 295  | 299  | 299  | RTS_R4+_369 |
| TSS-FWD-661 | FWD | 1146538 | 112  | 125  | 127  | RTS_R4+_369 |
| TSS-FWD-662 | FWD | 1146573 | 92   | 93   | 93   | RTS_R4+_369 |
| TSS-FWD-663 | FWD | 1146994 | 304  | 304  | 304  | RTS_R4+_370 |
| TSS-FWD-664 | FWD | 1147191 | 73   | 73   | 73   | RTS_R4+_371 |
| TSS-FWD-665 | FWD | 1147299 | 55   | 55   | 55   | RTS_R4+_371 |
| TSS-FWD-666 | FWD | 1147410 | 48   | 48   | 48   | RTS_R4+_371 |
| TSS-FWD-667 | FWD | 1150734 | 1892 | 1892 | 1892 | RTS_R4+_372 |
| TSS-FWD-668 | FWD | 1150759 | 68   | 68   | 68   | RTS_R4+_372 |
| TSS-FWD-669 | FWD | 1150772 | 318  | 319  | 320  | RTS_R4+_372 |
| TSS-FWD-670 | FWD | 1150783 | 3263 | 3268 | 3281 | RTS_R4+_372 |
| TSS-FWD-671 | FWD | 1150791 | 259  | 259  | 265  | RTS_R4+_372 |
| TSS-FWD-672 | FWD | 1150799 | 5082 | 5093 | 5111 | RTS_R4+_372 |
| TSS-FWD-673 | FWD | 1150828 | 144  | 144  | 144  | RTS_R4+_372 |
| TSS-FWD-674 | FWD | 1151079 | 37   | 39   | 39   | RTS_R4+_373 |
| TSS-FWD-675 | FWD | 1151133 | 27   | 27   | 27   | RTS_R4+_373 |
| TSS-FWD-676 | FWD | 1152502 | 13   | 13   | 13   | RTS_R4+_374 |
| TSS-FWD-677 | FWD | 1154242 | 49   | 49   | 49   | RTS_R4+_375 |
| TSS-FWD-678 | FWD | 1154281 | 148  | 149  | 149  | RTS_R4+_375 |
| TSS-FWD-679 | FWD | 1156852 | 19   | 19   | 19   | RTS_R4+_376 |
| TSS-FWD-680 | FWD | 1156960 | 68   | 68   | 68   | RTS_R4+_376 |
| TSS-FWD-681 | FWD | 1156971 | 214  | 214  | 214  | RTS_R4+_376 |
| TSS-FWD-682 | FWD | 1156977 | 127  | 127  | 128  | RTS_R4+_376 |
| TSS-FWD-683 | FWD | 1156990 | 2183 | 2183 | 2183 | RTS_R4+_376 |
| TSS-FWD-684 | FWD | 1161048 | 85   | 85   | 92   | RTS_R4+_377 |
| TSS-FWD-685 | FWD | 1161078 | 138  | 138  | 138  | RTS_R4+_377 |
| TSS-FWD-686 | FWD | 1161086 | 78   | 78   | 78   | RTS_R4+_377 |
| TSS-FWD-687 | FWD | 1163108 | 5    | 5    | 5    | RTS_R4+_378 |
| TSS-FWD-688 | FWD | 1163203 | 7    | 7    | 7    | RTS_R4+_378 |

|             |     |         |      |      |      |             |
|-------------|-----|---------|------|------|------|-------------|
| TSS-FWD-689 | FWD | 1164238 | 48   | 49   | 49   | RTS_R4+_379 |
| TSS-FWD-690 | FWD | 1165249 | 202  | 204  | 204  | RTS_R4+_380 |
| TSS-FWD-691 | FWD | 1165275 | 484  | 487  | 488  | RTS_R4+_380 |
| TSS-FWD-692 | FWD | 1166736 | 3    | 3    | 3    | RTS_R4+_381 |
| TSS-FWD-693 | FWD | 1168242 | 1707 | 1743 | 1750 | RTS_R4+_382 |
| TSS-FWD-694 | FWD | 1174623 | 65   | 66   | 66   | RTS_R4+_383 |
| TSS-FWD-695 | FWD | 1177461 | 102  | 102  | 102  | RTS_R4+_384 |
| TSS-FWD-696 | FWD | 1177640 | 122  | 122  | 124  | RTS_R4+_384 |
| TSS-FWD-697 | FWD | 1184963 | 38   | 38   | 38   | RTS_R4+_385 |
| TSS-FWD-698 | FWD | 1185028 | 55   | 56   | 56   | RTS_R4+_385 |
| TSS-FWD-699 | FWD | 1185046 | 4    | 5    | 5    | RTS_R4+_385 |
| TSS-FWD-700 | FWD | 1194184 | 88   | 90   | 90   | RTS_R4+_386 |
| TSS-FWD-701 | FWD | 1194193 | 217  | 218  | 218  | RTS_R4+_386 |
| TSS-FWD-702 | FWD | 1194231 | 108  | 109  | 109  | RTS_R4+_386 |
| TSS-FWD-703 | FWD | 1194325 | 60   | 61   | 61   | RTS_R4+_386 |
| TSS-FWD-704 | FWD | 1194242 | 1155 | 1158 | 1158 | RTS_R4+_386 |
| TSS-FWD-705 | FWD | 1197892 | 7    | 7    | 8    | RTS_R4+_387 |
| TSS-FWD-706 | FWD | 1200691 | 49   | 49   | 49   | RTS_R4+_388 |
| TSS-FWD-707 | FWD | 1202232 | 1    | 1    | 2    |             |
| TSS-FWD-708 | FWD | 1209545 | 64   | 64   | 64   |             |
| TSS-FWD-709 | FWD | 1210545 | 20   | 20   | 20   | RTS_R4+_389 |
| TSS-FWD-710 | FWD | 1214975 | 84   | 85   | 121  | RTS_R4+_390 |
| TSS-FWD-711 | FWD | 1214994 | 13   | 14   | 37   | RTS_R4+_390 |
| TSS-FWD-712 | FWD | 1216355 | 8    | 8    | 8    | RTS_R4+_391 |
| TSS-FWD-713 | FWD | 1218588 | 11   | 11   | 11   | RTS_R4+_392 |
| TSS-FWD-714 | FWD | 1219841 | 31   | 31   | 31   | RTS_R4+_393 |
| TSS-FWD-715 | FWD | 1223002 | 1    | 1    | 1    | RTS_R4+_394 |
| TSS-FWD-716 | FWD | 1225704 | 9    | 9    | 9    | RTS_R4+_395 |
| TSS-FWD-717 | FWD | 1226908 | 63   | 63   | 63   | RTS_R4+_396 |
| TSS-FWD-718 | FWD | 1227925 | 6    | 7    | 13   | RTS_R4+_397 |
| TSS-FWD-719 | FWD | 1228020 | 3    | 4    | 19   | RTS_R4+_397 |
| TSS-FWD-720 | FWD | 1228027 | 21   | 21   | 21   | RTS_R4+_397 |
| TSS-FWD-721 | FWD | 1230085 | 20   | 20   | 20   | RTS_R4+_398 |
| TSS-FWD-722 | FWD | 1234128 | 139  | 139  | 141  | RTS_R4+_399 |
| TSS-FWD-723 | FWD | 1234136 | 38   | 38   | 38   | RTS_R4+_399 |
| TSS-FWD-724 | FWD | 1236748 | 16   | 17   | 18   | RTS_R4+_400 |
| TSS-FWD-725 | FWD | 1236754 | 67   | 71   | 76   | RTS_R4+_400 |
| TSS-FWD-726 | FWD | 1236762 | 30   | 33   | 43   | RTS_R4+_400 |
| TSS-FWD-727 | FWD | 1241244 |      |      | 5    | RTS_R4+_401 |
| TSS-FWD-728 | FWD | 1242351 | 1055 | 1062 | 1063 | RTS_R4+_402 |
| TSS-FWD-729 | FWD | 1242388 | 42   | 42   | 42   | RTS_R4+_402 |
| TSS-FWD-730 | FWD | 1243901 | 8    | 9    | 41   | RTS_R4+_403 |
| TSS-FWD-731 | FWD | 1243934 |      |      | 26   | RTS_R4+_403 |
| TSS-FWD-732 | FWD | 1250212 | 2    | 4    | 4    | RTS_R4+_405 |
| TSS-FWD-733 | FWD | 1250224 | 2    | 2    | 3    | RTS_R4+_405 |
| TSS-FWD-734 | FWD | 1257889 | 55   | 63   | 64   | RTS_R4+_406 |
| TSS-FWD-735 | FWD | 1257939 |      | 53   | 53   | RTS_R4+_406 |
| TSS-FWD-736 | FWD | 1257961 | 13   | 116  | 777  | RTS_R4+_406 |
| TSS-FWD-737 | FWD | 1257999 | 7    | 264  | 489  | RTS_R4+_406 |
| TSS-FWD-738 | FWD | 1262806 |      |      | 1    | RTS_R4+_407 |
| TSS-FWD-739 | FWD | 1262898 | 54   | 63   | 64   | RTS_R4+_407 |
| TSS-FWD-740 | FWD | 1266404 | 75   | 75   | 76   | RTS_R4+_408 |
| TSS-FWD-741 | FWD | 1266413 | 51   | 51   | 51   | RTS_R4+_408 |
| TSS-FWD-742 | FWD | 1267041 | 33   | 33   | 33   | RTS_R4+_409 |
| TSS-FWD-743 | FWD | 1267079 | 8    | 8    | 8    | RTS_R4+_409 |
| TSS-FWD-744 | FWD | 1267253 | 966  | 971  | 971  | RTS_R4+_409 |
| TSS-FWD-745 | FWD | 1267259 | 76   | 76   | 76   | RTS_R4+_409 |
| TSS-FWD-746 | FWD | 1267374 | 58   | 58   | 58   | RTS_R4+_409 |
| TSS-FWD-747 | FWD | 1271318 | 28   | 29   | 34   | RTS_R4+_410 |
| TSS-FWD-748 | FWD | 1271647 | 147  | 147  | 150  | RTS_R4+_411 |
| TSS-FWD-749 | FWD | 1271652 | 68   | 68   | 68   | RTS_R4+_411 |
| TSS-FWD-750 | FWD | 1272845 | 8    | 8    | 8    | RTS_R4+_412 |
| TSS-FWD-751 | FWD | 1272970 | 6    | 7    | 7    | RTS_R4+_412 |

|             |     |         |      |      |      |             |
|-------------|-----|---------|------|------|------|-------------|
| TSS-FWD-752 | FWD | 1272976 | 5    | 5    | 5    | RTS_R4+_412 |
| TSS-FWD-753 | FWD | 1279048 | 1    | 2    | 2    | RTS_R4+_414 |
| TSS-FWD-754 | FWD | 1288329 | 301  | 303  | 330  | RTS_R4+_415 |
| TSS-FWD-755 | FWD | 1288358 | 38   | 39   | 43   | RTS_R4+_415 |
| TSS-FWD-756 | FWD | 1289379 | 133  | 134  | 136  | RTS_R4+_416 |
| TSS-FWD-757 | FWD | 1289443 | 3    | 3    | 4    | RTS_R4+_416 |
| TSS-FWD-758 | FWD | 1290544 | 352  | 353  | 353  | RTS_R4+_417 |
| TSS-FWD-759 | FWD | 1290550 | 138  | 139  | 139  | RTS_R4+_417 |
| TSS-FWD-760 | FWD | 1290557 | 106  | 106  | 106  | RTS_R4+_417 |
| TSS-FWD-761 | FWD | 1290562 | 312  | 312  | 312  | RTS_R4+_417 |
| TSS-FWD-762 | FWD | 1290568 | 767  | 767  | 767  | RTS_R4+_417 |
| TSS-FWD-763 | FWD | 1290586 | 62   | 68   | 68   | RTS_R4+_417 |
| TSS-FWD-764 | FWD | 1290629 | 130  | 134  | 134  | RTS_R4+_417 |
| TSS-FWD-765 | FWD | 1290637 | 341  | 344  | 345  | RTS_R4+_417 |
| TSS-FWD-766 | FWD | 1290644 | 193  | 193  | 194  | RTS_R4+_417 |
| TSS-FWD-767 | FWD | 1290649 | 116  | 116  | 117  | RTS_R4+_417 |
| TSS-FWD-768 | FWD | 1290675 | 53   | 53   | 53   | RTS_R4+_417 |
| TSS-FWD-769 | FWD | 1292716 | 83   | 83   | 83   | RTS_R4+_418 |
| TSS-FWD-770 | FWD | 1297634 | 16   | 16   | 16   | RTS_R4+_419 |
| TSS-FWD-771 | FWD | 1298695 | 16   | 16   | 16   | RTS_R4+_420 |
| TSS-FWD-772 | FWD | 1299035 | 191  | 215  | 217  | RTS_R4+_421 |
| TSS-FWD-773 | FWD | 1299087 | 54   | 57   | 57   | RTS_R4+_421 |
| TSS-FWD-774 | FWD | 1299100 | 244  | 247  | 247  | RTS_R4+_421 |
| TSS-FWD-775 | FWD | 1299154 | 231  | 232  | 232  | RTS_R4+_421 |
| TSS-FWD-776 | FWD | 1301158 | 12   | 12   | 12   | RTS_R4+_422 |
| TSS-FWD-777 | FWD | 1301186 | 19   | 19   | 19   | RTS_R4+_422 |
| TSS-FWD-778 | FWD | 1306787 | 46   | 51   | 55   | RTS_R4+_423 |
| TSS-FWD-779 | FWD | 1309082 | 154  | 154  | 155  | RTS_R4+_424 |
| TSS-FWD-780 | FWD | 1309102 | 64   | 64   | 64   | RTS_R4+_424 |
| TSS-FWD-781 | FWD | 1312015 | 5    | 32   | 35   | RTS_R4+_425 |
| TSS-FWD-782 | FWD | 1321212 | 25   | 25   | 25   | RTS_R4+_426 |
| TSS-FWD-783 | FWD | 1321789 | 79   | 79   | 79   | RTS_R4+_427 |
| TSS-FWD-784 | FWD | 1324321 | 16   | 16   | 16   | RTS_R4+_429 |
| TSS-FWD-785 | FWD | 1324784 | 381  | 382  | 382  | RTS_R4+_430 |
| TSS-FWD-786 | FWD | 1324836 | 81   | 81   | 81   | RTS_R4+_430 |
| TSS-FWD-787 | FWD | 1327326 | 330  | 331  | 331  | RTS_R4+_431 |
| TSS-FWD-788 | FWD | 1328821 | 15   | 15   | 16   | RTS_R4+_432 |
| TSS-FWD-789 | FWD | 1328843 | 17   | 17   | 17   | RTS_R4+_432 |
| TSS-FWD-790 | FWD | 1328907 | 4    | 4    | 4    | RTS_R4+_432 |
| TSS-FWD-791 | FWD | 1329004 | 1    | 3    | 3    | RTS_R4+_432 |
| TSS-FWD-792 | FWD | 1331785 | 304  | 305  | 305  | RTS_R4+_433 |
| TSS-FWD-793 | FWD | 1331795 | 509  | 510  | 510  | RTS_R4+_433 |
| TSS-FWD-794 | FWD | 1331804 | 69   | 69   | 69   | RTS_R4+_433 |
| TSS-FWD-795 | FWD | 1333102 | 21   | 21   | 76   | RTS_R4+_434 |
| TSS-FWD-796 | FWD | 1333114 | 117  | 120  | 120  | RTS_R4+_434 |
| TSS-FWD-797 | FWD | 1333123 | 68   | 69   | 71   | RTS_R4+_434 |
| TSS-FWD-798 | FWD | 1333453 | 38   | 38   | 38   | RTS_R4+_435 |
| TSS-FWD-799 | FWD | 1333805 | 106  | 109  | 120  | RTS_R4+_435 |
| TSS-FWD-800 | FWD | 1337333 | 22   | 22   | 22   | RTS_R4+_436 |
| TSS-FWD-801 | FWD | 1337396 | 16   | 16   | 16   | RTS_R4+_436 |
| TSS-FWD-802 | FWD | 1338115 | 18   | 18   | 18   | RTS_R4+_437 |
| TSS-FWD-803 | FWD | 1338159 | 12   | 26   | 26   | RTS_R4+_437 |
| TSS-FWD-804 | FWD | 1339893 | 44   | 44   | 44   | RTS_R4+_438 |
| TSS-FWD-805 | FWD | 1339903 | 45   | 45   | 45   | RTS_R4+_438 |
| TSS-FWD-806 | FWD | 1359076 | 417  | 417  | 428  | RTS_R4+_439 |
| TSS-FWD-807 | FWD | 1359085 | 47   | 47   | 48   | RTS_R4+_439 |
| TSS-FWD-808 | FWD | 1359092 | 196  | 196  | 197  | RTS_R4+_439 |
| TSS-FWD-809 | FWD | 1359119 | 92   | 92   | 93   | RTS_R4+_439 |
| TSS-FWD-810 | FWD | 1366062 | 438  | 732  | 737  | RTS_R4+_440 |
| TSS-FWD-811 | FWD | 1366071 | 45   | 82   | 82   | RTS_R4+_440 |
| TSS-FWD-812 | FWD | 1367686 | 1141 | 1141 | 1141 | RTS_R4+_441 |
| TSS-FWD-813 | FWD | 1382094 | 31   | 91   | 94   | RTS_R4+_443 |
| TSS-FWD-814 | FWD | 1382105 | 82   | 93   | 93   | RTS_R4+_443 |

|             |     |         |     |     |     |             |
|-------------|-----|---------|-----|-----|-----|-------------|
| TSS-FWD-815 | FWD | 1384715 | 91  | 91  | 94  | RTS_R4+_444 |
| TSS-FWD-816 | FWD | 1384723 | 32  | 33  | 33  | RTS_R4+_444 |
| TSS-FWD-817 | FWD | 1386892 | 19  | 20  | 20  | RTS_R4+_445 |
| TSS-FWD-818 | FWD | 1389971 | 38  | 44  | 45  | RTS_R4+_446 |
| TSS-FWD-819 | FWD | 1390986 | 17  | 17  | 17  | RTS_R4+_447 |
| TSS-FWD-820 | FWD | 1393945 | 2   | 4   | 4   | RTS_R4+_448 |
| TSS-FWD-821 | FWD | 1395353 | 355 | 361 | 365 | RTS_R4+_449 |
| TSS-FWD-822 | FWD | 1395364 | 350 | 350 | 354 | RTS_R4+_449 |
| TSS-FWD-823 | FWD | 1402725 | 5   | 5   | 5   | RTS_R4+_450 |
| TSS-FWD-824 | FWD | 1403917 | 14  | 15  | 15  | RTS_R4+_451 |
| TSS-FWD-825 | FWD | 1403980 | 21  | 21  | 21  | RTS_R4+_451 |
| TSS-FWD-826 | FWD | 1406048 | 4   | 9   | 37  | RTS_R4+_452 |
| TSS-FWD-827 | FWD | 1406499 | 15  | 15  | 15  | RTS_R4+_453 |
| TSS-FWD-828 | FWD | 1407153 | 6   | 322 | 324 | RTS_R4+_454 |
| TSS-FWD-829 | FWD | 1407307 | 9   | 9   | 9   | RTS_R4+_455 |
| TSS-FWD-830 | FWD | 1416670 | 10  | 10  | 10  |             |
| TSS-FWD-831 | FWD | 1418251 | 1   | 1   | 1   |             |
| TSS-FWD-832 | FWD | 1421735 | 13  | 13  | 13  | RTS_R4+_456 |
| TSS-FWD-833 | FWD | 1429174 | 5   | 5   | 5   | RTS_R4+_458 |
| TSS-FWD-834 | FWD | 1431209 |     |     | 1   | RTS_R4+_459 |
| TSS-FWD-835 | FWD | 1432540 | 6   | 6   | 6   | RTS_R4+_460 |
| TSS-FWD-836 | FWD | 1435014 | 2   | 2   | 2   | RTS_R4+_461 |
| TSS-FWD-837 | FWD | 1439047 | 35  | 46  | 96  | RTS_R4+_462 |
| TSS-FWD-838 | FWD | 1441032 | 95  | 95  | 95  | RTS_R4+_463 |
| TSS-FWD-839 | FWD | 1441046 | 34  | 34  | 34  | RTS_R4+_463 |
| TSS-FWD-840 | FWD | 1443593 | 35  | 35  | 35  | RTS_R4+_464 |
| TSS-FWD-841 | FWD | 1445367 | 13  | 13  | 13  | RTS_R4+_465 |
| TSS-FWD-842 | FWD | 1459465 | 17  | 17  | 17  | RTS_R4+_466 |
| TSS-FWD-843 | FWD | 1460199 | 6   | 6   | 6   | RTS_R4+_467 |
| TSS-FWD-844 | FWD | 1461534 | 13  | 13  | 21  | RTS_R4+_468 |
| TSS-FWD-845 | FWD | 1465734 | 9   | 9   | 9   | RTS_R4+_470 |
| TSS-FWD-846 | FWD | 1465893 | 4   | 4   | 10  | RTS_R4+_470 |
| TSS-FWD-847 | FWD | 1467293 |     | 1   | 1   | RTS_R4+_471 |
| TSS-FWD-848 | FWD | 1468976 | 11  | 11  | 11  | RTS_R4+_472 |
| TSS-FWD-849 | FWD | 1469073 | 15  | 17  | 17  | RTS_R4+_472 |
| TSS-FWD-850 | FWD | 1469159 | 5   | 14  | 14  | RTS_R4+_472 |
| TSS-FWD-851 | FWD | 1472213 | 23  | 23  | 25  | RTS_R4+_473 |
| TSS-FWD-852 | FWD | 1481038 | 87  | 88  | 90  | RTS_R4+_474 |
| TSS-FWD-853 | FWD | 1485191 | 71  | 72  | 72  | RTS_R4+_475 |
| TSS-FWD-854 | FWD | 1485228 | 129 | 135 | 135 | RTS_R4+_475 |
| TSS-FWD-855 | FWD | 1486215 | 95  | 95  | 111 | RTS_R4+_476 |
| TSS-FWD-856 | FWD | 1488899 | 254 | 254 | 254 | RTS_R4+_477 |
| TSS-FWD-857 | FWD | 1489467 | 45  | 45  | 45  | RTS_R4+_478 |
| TSS-FWD-858 | FWD | 1489838 | 33  | 37  | 40  |             |
| TSS-FWD-859 | FWD | 1490461 | 18  | 18  | 18  | RTS_R4+_479 |
| TSS-FWD-860 | FWD | 1493185 | 9   | 9   | 9   | RTS_R4+_480 |
| TSS-FWD-861 | FWD | 1494803 | 32  | 32  | 33  | RTS_R4+_481 |
| TSS-FWD-862 | FWD | 1496788 |     |     | 11  | RTS_R4+_483 |
| TSS-FWD-863 | FWD | 1498559 | 9   | 9   | 9   | RTS_R4+_484 |
| TSS-FWD-864 | FWD | 1500452 | 72  | 75  | 80  | RTS_R4+_485 |
| TSS-FWD-865 | FWD | 1501681 | 12  | 13  | 13  | RTS_R4+_486 |
| TSS-FWD-866 | FWD | 1503923 | 4   | 4   | 4   | RTS_R4+_487 |
| TSS-FWD-867 | FWD | 1504343 |     | 1   | 5   | RTS_R4+_488 |
| TSS-FWD-868 | FWD | 1507299 | 65  | 65  | 67  | RTS_R4+_489 |
| TSS-FWD-869 | FWD | 1508002 | 23  | 23  | 23  | RTS_R4+_490 |
| TSS-FWD-870 | FWD | 1509620 |     |     | 17  | RTS_R4+_491 |
| TSS-FWD-871 | FWD | 1509628 |     |     | 17  | RTS_R4+_491 |
| TSS-FWD-872 | FWD | 1512672 | 8   | 8   | 8   | RTS_R4+_492 |
| TSS-FWD-873 | FWD | 1515286 | 14  | 14  | 14  | RTS_R4+_493 |
| TSS-FWD-874 | FWD | 1515384 | 13  | 13  | 13  | RTS_R4+_493 |
| TSS-FWD-875 | FWD | 1515636 | 646 | 674 | 694 | RTS_R4+_494 |
| TSS-FWD-876 | FWD | 1517023 | 69  | 70  | 73  | RTS_R4+_495 |
| TSS-FWD-877 | FWD | 1518295 | 8   | 8   | 8   | RTS_R4+_496 |

|             |     |         |      |      |      |             |
|-------------|-----|---------|------|------|------|-------------|
| TSS-FWD-878 | FWD | 1518318 | 6    | 6    | 6    | RTS_R4+_496 |
| TSS-FWD-879 | FWD | 1521251 | 1198 | 1198 | 1200 | RTS_R4+_497 |
| TSS-FWD-880 | FWD | 1521288 | 80   | 80   | 81   | RTS_R4+_497 |
| TSS-FWD-881 | FWD | 1524249 | 27   | 27   | 30   | RTS_R4+_498 |
| TSS-FWD-882 | FWD | 1528575 | 12   | 12   | 12   |             |
| TSS-FWD-883 | FWD | 1531009 | 112  | 131  | 136  | RTS_R4+_501 |
| TSS-FWD-884 | FWD | 1531017 | 51   | 59   | 61   | RTS_R4+_501 |
| TSS-FWD-885 | FWD | 1531054 | 219  | 221  | 223  | RTS_R4+_501 |
| TSS-FWD-886 | FWD | 1532024 | 13   | 13   | 13   | RTS_R4+_502 |
| TSS-FWD-887 | FWD | 1545331 | 7    | 7    | 7    | RTS_R4+_503 |
| TSS-FWD-888 | FWD | 1554623 | 648  | 648  | 648  | RTS_R4+_504 |
| TSS-FWD-889 | FWD | 1554633 | 18   | 18   | 18   | RTS_R4+_504 |
| TSS-FWD-890 | FWD | 1590454 | 8    | 9    | 11   | RTS_R4+_505 |
| TSS-FWD-891 | FWD | 1590496 | 18   | 18   | 18   | RTS_R4+_505 |
| TSS-FWD-892 | FWD | 1604091 | 14   | 14   | 16   | RTS_R4+_507 |
| TSS-FWD-893 | FWD | 1605347 | 47   | 50   | 51   | RTS_R4+_508 |
| TSS-FWD-894 | FWD | 1612804 | 9    | 10   | 10   | RTS_R4+_510 |
| TSS-FWD-895 | FWD | 1615019 | 18   | 18   | 18   | RTS_R4+_511 |
| TSS-FWD-896 | FWD | 1615025 | 13   | 13   | 13   | RTS_R4+_511 |
| TSS-FWD-897 | FWD | 1617117 | 20   | 21   | 21   | RTS_R4+_512 |
| TSS-FWD-898 | FWD | 1619451 | 4    | 4    | 4    | RTS_R4+_513 |
| TSS-FWD-899 | FWD | 1620611 | 161  | 197  | 199  | RTS_R4+_514 |
| TSS-FWD-900 | FWD | 1620623 | 14   | 67   | 76   | RTS_R4+_514 |
| TSS-FWD-901 | FWD | 1620630 | 4    | 16   | 30   | RTS_R4+_514 |
| TSS-FWD-902 | FWD | 1622714 | 5    | 5    | 5    | RTS_R4+_515 |
| TSS-FWD-903 | FWD | 1622754 | 6    | 6    | 6    | RTS_R4+_515 |
| TSS-FWD-904 | FWD | 1622768 | 7    | 7    | 8    | RTS_R4+_515 |
| TSS-FWD-905 | FWD | 1625515 | 277  | 285  | 293  | RTS_R4+_516 |
| TSS-FWD-906 | FWD | 1625525 | 34   | 40   | 44   | RTS_R4+_516 |
| TSS-FWD-907 | FWD | 1626350 | 47   | 48   | 48   | RTS_R4+_517 |
| TSS-FWD-908 | FWD | 1627192 |      | 15   | 15   | RTS_R4+_518 |
| TSS-FWD-909 | FWD | 1630662 | 2    | 2    | 2    | RTS_R4+_520 |
| TSS-FWD-910 | FWD | 1640110 | 11   | 11   | 13   | RTS_R4+_521 |
| TSS-FWD-911 | FWD | 1644252 |      | 1    | 1    | RTS_R4+_522 |
| TSS-FWD-912 | FWD | 1644356 | 10   | 11   | 11   | RTS_R4+_523 |
| TSS-FWD-913 | FWD | 1644385 | 10   | 11   | 11   | RTS_R4+_523 |
| TSS-FWD-914 | FWD | 1644410 | 10   | 10   | 10   | RTS_R4+_523 |
| TSS-FWD-915 | FWD | 1645955 | 264  | 268  | 273  | RTS_R4+_524 |
| TSS-FWD-916 | FWD | 1645971 | 175  | 176  | 177  | RTS_R4+_524 |
| TSS-FWD-917 | FWD | 1646462 | 3    | 3    | 3    | RTS_R4+_525 |
| TSS-FWD-918 | FWD | 1647206 | 14   | 14   | 17   | RTS_R4+_526 |
| TSS-FWD-919 | FWD | 1647275 | 8    | 12   | 18   | RTS_R4+_526 |
| TSS-FWD-920 | FWD | 1653746 | 27   | 27   | 27   | RTS_R4+_528 |
| TSS-FWD-921 | FWD | 1653808 | 69   | 71   | 71   | RTS_R4+_528 |
| TSS-FWD-922 | FWD | 1655563 | 151  | 164  | 193  | RTS_R4+_529 |
| TSS-FWD-923 | FWD | 1655569 | 18   | 22   | 55   | RTS_R4+_529 |
| TSS-FWD-924 | FWD | 1656059 | 2    | 2    | 2    | RTS_R4+_530 |
| TSS-FWD-925 | FWD | 1656061 | 2    | 2    | 2    | RTS_R4+_530 |
| TSS-FWD-926 | FWD | 1657572 |      | 1    | 1    | RTS_R4+_531 |
| TSS-FWD-927 | FWD | 1657638 | 1    | 1    | 1    | RTS_R4+_531 |
| TSS-FWD-928 | FWD | 1659685 | 6    | 6    | 6    | RTS_R4+_532 |
| TSS-FWD-929 | FWD | 1661476 | 1    | 1    | 1    | RTS_R4+_533 |
| TSS-FWD-930 | FWD | 1661746 |      | 1    | 1    | RTS_R4+_533 |
| TSS-FWD-931 | FWD | 1663316 |      |      | 1    | RTS_R4+_534 |
| TSS-FWD-932 | FWD | 1663319 | 1    | 1    | 1    | RTS_R4+_534 |
| TSS-FWD-933 | FWD | 1667686 | 5    | 5    | 5    | RTS_R4+_535 |
| TSS-FWD-934 | FWD | 1667781 | 6    | 6    | 6    | RTS_R4+_535 |
| TSS-FWD-935 | FWD | 1669351 | 15   | 15   | 15   | RTS_R4+_536 |
| TSS-FWD-936 | FWD | 1669940 | 15   | 22   | 60   | RTS_R4+_537 |
| TSS-FWD-937 | FWD | 1671914 | 1    | 6    | 6    | RTS_R4+_538 |
| TSS-FWD-938 | FWD | 1676332 | 30   | 31   | 32   | RTS_R4+_539 |
| TSS-FWD-939 | FWD | 1676394 | 425  | 427  | 427  | RTS_R4+_539 |
| TSS-FWD-940 | FWD | 1676402 | 30   | 30   | 30   | RTS_R4+_539 |

|              |     |         |      |       |       |             |
|--------------|-----|---------|------|-------|-------|-------------|
| TSS-FWD-941  | FWD | 1678643 | 3    | 3     | 3     | RTS_R4+_540 |
| TSS-FWD-942  | FWD | 1678869 | 5    | 5     | 5     | RTS_R4+_540 |
| TSS-FWD-943  | FWD | 1680159 | 97   | 97    | 97    | RTS_R4+_541 |
| TSS-FWD-944  | FWD | 1680160 | 61   | 62    | 62    | RTS_R4+_541 |
| TSS-FWD-945  | FWD | 1682257 | 26   | 26    | 29    | RTS_R4+_542 |
| TSS-FWD-946  | FWD | 1686569 | 51   | 52    | 52    | RTS_R4+_543 |
| TSS-FWD-947  | FWD | 1686575 | 64   | 64    | 64    | RTS_R4+_543 |
| TSS-FWD-948  | FWD | 1687818 | 138  | 138   | 142   | RTS_R4+_544 |
| TSS-FWD-949  | FWD | 1697338 | 15   | 18    | 18    | RTS_R4+_545 |
| TSS-FWD-950  | FWD | 1697348 | 5    | 11    | 11    | RTS_R4+_545 |
| TSS-FWD-951  | FWD | 1698864 | 50   | 50    | 50    | RTS_R4+_546 |
| TSS-FWD-952  | FWD | 1700228 | 44   | 44    | 44    | RTS_R4+_547 |
| TSS-FWD-953  | FWD | 1702086 | 1    | 1     | 1     | RTS_R4+_548 |
| TSS-FWD-954  | FWD | 1702412 | 72   | 75    | 75    | RTS_R4+_549 |
| TSS-FWD-955  | FWD | 1702536 | 293  | 328   | 333   | RTS_R4+_549 |
| TSS-FWD-956  | FWD | 1702879 | 62   | 62    | 62    | RTS_R4+_550 |
| TSS-FWD-957  | FWD | 1703230 | 54   | 54    | 54    | RTS_R4+_551 |
| TSS-FWD-958  | FWD | 1710713 | 9    | 9     | 9     | RTS_R4+_553 |
| TSS-FWD-959  | FWD | 1712376 | 113  | 113   | 113   | RTS_R4+_554 |
| TSS-FWD-960  | FWD | 1717775 | 405  | 414   | 420   | RTS_R4+_555 |
| TSS-FWD-961  | FWD | 1717783 | 98   | 109   | 117   | RTS_R4+_555 |
| TSS-FWD-962  | FWD | 1717794 | 168  | 175   | 222   | RTS_R4+_555 |
| TSS-FWD-963  | FWD | 1717801 | 3797 | 3920  | 3932  | RTS_R4+_555 |
| TSS-FWD-964  | FWD | 1717842 | 304  | 306   | 306   | RTS_R4+_555 |
| TSS-FWD-965  | FWD | 1717855 | 80   | 81    | 86    | RTS_R4+_555 |
| TSS-FWD-966  | FWD | 1717893 | 139  | 147   | 150   | RTS_R4+_555 |
| TSS-FWD-967  | FWD | 1718960 | 6    | 7     | 7     | RTS_R4+_556 |
| TSS-FWD-968  | FWD | 1719022 | 4    | 4     | 4     | RTS_R4+_556 |
| TSS-FWD-969  | FWD | 1724047 | 23   | 23    | 24    | RTS_R4+_557 |
| TSS-FWD-970  | FWD | 1724064 | 15   | 15    | 15    | RTS_R4+_557 |
| TSS-FWD-971  | FWD | 1725785 | 51   | 52    | 52    | RTS_R4+_558 |
| TSS-FWD-972  | FWD | 1725824 | 305  | 321   | 321   | RTS_R4+_558 |
| TSS-FWD-973  | FWD | 1725833 | 454  | 460   | 460   | RTS_R4+_558 |
| TSS-FWD-974  | FWD | 1726343 | 29   | 29    | 29    | RTS_R4+_559 |
| TSS-FWD-975  | FWD | 1732405 | 60   | 60    | 60    | RTS_R4+_560 |
| TSS-FWD-976  | FWD | 1733349 | 2186 | 2236  | 2242  | RTS_R4+_561 |
| TSS-FWD-977  | FWD | 1733362 | 1519 | 1731  | 1758  | RTS_R4+_561 |
| TSS-FWD-978  | FWD | 1733380 | 163  | 170   | 170   | RTS_R4+_561 |
| TSS-FWD-979  | FWD | 1735712 | 245  | 245   | 245   | RTS_R4+_562 |
| TSS-FWD-980  | FWD | 1735720 | 52   | 52    | 52    | RTS_R4+_562 |
| TSS-FWD-981  | FWD | 1737904 | 50   | 52    | 53    | RTS_R4+_563 |
| TSS-FWD-982  | FWD | 1739225 | 127  | 128   | 131   | RTS_R4+_564 |
| TSS-FWD-983  | FWD | 1739338 | 156  | 156   | 157   | RTS_R4+_564 |
| TSS-FWD-984  | FWD | 1739404 | 36   | 38    | 41    | RTS_R4+_564 |
| TSS-FWD-985  | FWD | 1741414 | 25   | 27    | 27    | RTS_R4+_565 |
| TSS-FWD-986  | FWD | 1744459 | 438  | 448   | 484   | RTS_R4+_566 |
| TSS-FWD-987  | FWD | 1744697 | 310  | 312   | 313   | RTS_R4+_567 |
| TSS-FWD-988  | FWD | 1745115 | 82   | 82    | 91    | RTS_R4+_568 |
| TSS-FWD-989  | FWD | 1753583 | 265  | 265   | 265   | RTS_R4+_569 |
| TSS-FWD-990  | FWD | 1753624 | 88   | 88    | 91    | RTS_R4+_569 |
| TSS-FWD-991  | FWD | 1753637 | 144  | 144   | 144   | RTS_R4+_569 |
| TSS-FWD-992  | FWD | 1753651 | 251  | 251   | 255   | RTS_R4+_569 |
| TSS-FWD-993  | FWD | 1753685 | 635  | 635   | 638   | RTS_R4+_569 |
| TSS-FWD-994  | FWD | 1753695 | 601  | 602   | 603   | RTS_R4+_569 |
| TSS-FWD-995  | FWD | 1753703 | 70   | 70    | 70    | RTS_R4+_569 |
| TSS-FWD-996  | FWD | 1755407 | 8970 | 10076 | 12457 | RTS_R4+_570 |
| TSS-FWD-997  | FWD | 1755419 | 8492 | 8517  | 8520  | RTS_R4+_570 |
| TSS-FWD-998  | FWD | 1766794 | 18   | 18    | 18    | RTS_R4+_571 |
| TSS-FWD-999  | FWD | 1768396 | 367  | 428   | 472   |             |
| TSS-FWD-1000 | FWD | 1772646 | 13   | 13    | 13    | RTS_R4+_573 |
| TSS-FWD-1001 | FWD | 1785439 | 35   | 36    | 37    | RTS_R4+_575 |
| TSS-FWD-1002 | FWD | 1786345 | 128  | 128   | 128   | RTS_R4+_576 |
| TSS-FWD-1003 | FWD | 1786408 | 62   | 63    | 63    | RTS_R4+_576 |



|              |     |         |      |      |      |             |
|--------------|-----|---------|------|------|------|-------------|
| TSS-FWD-1004 | FWD | 1786444 | 54   | 54   | 54   | RTS_R4+_576 |
| TSS-FWD-1005 | FWD | 1787609 | 70   | 70   | 70   | RTS_R4+_577 |
| TSS-FWD-1006 | FWD | 1797314 | 4    | 4    | 4    | RTS_R4+_578 |
| TSS-FWD-1007 | FWD | 1803158 | 9    | 9    | 9    | RTS_R4+_579 |
| TSS-FWD-1008 | FWD | 1804346 | 2    | 2    | 2    | RTS_R4+_580 |
| TSS-FWD-1009 | FWD | 1804376 | 110  | 112  | 114  | RTS_R4+_580 |
| TSS-FWD-1010 | FWD | 1805399 | 33   | 33   | 35   | RTS_R4+_581 |
| TSS-FWD-1011 | FWD | 1805794 |      | 2    | 17   | RTS_R4+_582 |
| TSS-FWD-1012 | FWD | 1807303 | 70   | 70   | 70   | RTS_R4+_583 |
| TSS-FWD-1013 | FWD | 1807313 | 32   | 32   | 32   | RTS_R4+_583 |
| TSS-FWD-1014 | FWD | 1807348 | 137  | 137  | 138  | RTS_R4+_583 |
| TSS-FWD-1015 | FWD | 1808906 | 5390 | 5391 | 5391 | RTS_R4+_585 |
| TSS-FWD-1016 | FWD | 1808938 | 74   | 74   | 74   | RTS_R4+_585 |
| TSS-FWD-1017 | FWD | 1808943 | 119  | 119  | 119  | RTS_R4+_585 |
| TSS-FWD-1018 | FWD | 1811839 | 46   | 46   | 46   | RTS_R4+_586 |
| TSS-FWD-1019 | FWD | 1820452 | 178  | 179  | 179  | RTS_R4+_587 |
| TSS-FWD-1020 | FWD | 1820460 | 607  | 611  | 612  | RTS_R4+_587 |
| TSS-FWD-1021 | FWD | 1821516 | 37   | 37   | 37   | RTS_R4+_588 |
| TSS-FWD-1022 | FWD | 1830423 | 109  | 110  | 110  | RTS_R4+_589 |
| TSS-FWD-1023 | FWD | 1831520 | 6    | 6    | 6    | RTS_R4+_590 |
| TSS-FWD-1024 | FWD | 1832010 | 11   | 11   | 11   | RTS_R4+_591 |
| TSS-FWD-1025 | FWD | 1833171 | 4    | 4    | 4    | RTS_R4+_592 |
| TSS-FWD-1026 | FWD | 1833341 | 6    | 6    | 6    | RTS_R4+_592 |
| TSS-FWD-1027 | FWD | 1833483 | 4    | 4    | 4    | RTS_R4+_592 |
| TSS-FWD-1028 | FWD | 1839484 | 30   | 30   | 30   | RTS_R4+_593 |
| TSS-FWD-1029 | FWD | 1840289 | 84   | 85   | 85   | RTS_R4+_594 |
| TSS-FWD-1030 | FWD | 1840332 | 601  | 603  | 604  | RTS_R4+_594 |
| TSS-FWD-1031 | FWD | 1840340 | 82   | 82   | 82   | RTS_R4+_594 |
| TSS-FWD-1032 | FWD | 1840347 | 87   | 87   | 87   | RTS_R4+_594 |
| TSS-FWD-1033 | FWD | 1840356 | 228  | 228  | 228  | RTS_R4+_594 |
| TSS-FWD-1034 | FWD | 1840362 | 43   | 43   | 43   | RTS_R4+_594 |
| TSS-FWD-1035 | FWD | 1840370 | 73   | 73   | 73   | RTS_R4+_594 |
| TSS-FWD-1036 | FWD | 1840385 | 76   | 77   | 77   | RTS_R4+_594 |
| TSS-FWD-1037 | FWD | 1846816 | 116  | 117  | 118  | RTS_R4+_595 |
| TSS-FWD-1038 | FWD | 1848858 | 48   | 49   | 49   | RTS_R4+_596 |
| TSS-FWD-1039 | FWD | 1860550 | 85   | 85   | 96   | RTS_R4+_598 |
| TSS-FWD-1040 | FWD | 1860641 | 407  | 407  | 407  | RTS_R4+_598 |
| TSS-FWD-1041 | FWD | 1860750 | 110  | 113  | 115  | RTS_R4+_598 |
| TSS-FWD-1042 | FWD | 1860759 | 3007 | 3020 | 3020 | RTS_R4+_598 |
| TSS-FWD-1043 | FWD | 1860764 | 1834 | 1836 | 1838 | RTS_R4+_598 |
| TSS-FWD-1044 | FWD | 1860768 | 765  | 768  | 769  | RTS_R4+_598 |
| TSS-FWD-1045 | FWD | 1860775 | 103  | 105  | 106  | RTS_R4+_598 |
| TSS-FWD-1046 | FWD | 1861848 | 45   | 47   | 47   | RTS_R4+_599 |
| TSS-FWD-1047 | FWD | 1864771 |      |      | 11   | RTS_R4+_600 |
| TSS-FWD-1048 | FWD | 1869267 | 2    | 2    | 2    | RTS_R4+_601 |
| TSS-FWD-1049 | FWD | 1870070 | 3    | 3    | 3    | RTS_R4+_602 |
| TSS-FWD-1050 | FWD | 1871568 | 26   | 26   | 26   | RTS_R4+_603 |
| TSS-FWD-1051 | FWD | 1872376 | 4    | 4    | 4    | RTS_R4+_604 |
| TSS-FWD-1052 | FWD | 1873676 | 1    | 1    | 1    |             |
| TSS-FWD-1053 | FWD | 1874890 | 16   | 16   | 17   | RTS_R4+_605 |
| TSS-FWD-1054 | FWD | 1874905 | 19   | 20   | 20   | RTS_R4+_605 |
| TSS-FWD-1055 | FWD | 1875691 | 134  | 134  | 134  | RTS_R4+_606 |
| TSS-FWD-1056 | FWD | 1879856 | 4    | 4    | 4    | RTS_R4+_607 |
| TSS-FWD-1057 | FWD | 1881168 | 1    | 1    | 1    |             |
| TSS-FWD-1058 | FWD | 1891360 | 4025 | 4080 | 4082 | RTS_R4+_608 |
| TSS-FWD-1059 | FWD | 1891366 | 463  | 470  | 470  | RTS_R4+_608 |
| TSS-FWD-1060 | FWD | 1891374 | 78   | 81   | 81   | RTS_R4+_608 |
| TSS-FWD-1061 | FWD | 1892041 | 11   | 11   | 50   | RTS_R4+_609 |
| TSS-FWD-1062 | FWD | 1892781 | 32   | 32   | 32   | RTS_R4+_610 |
| TSS-FWD-1063 | FWD | 1894833 |      | 106  | 106  | RTS_R4+_611 |
| TSS-FWD-1064 | FWD | 1899959 | 103  | 113  | 126  | RTS_R4+_613 |
| TSS-FWD-1065 | FWD | 1900054 | 39   | 40   | 40   | RTS_R4+_613 |
| TSS-FWD-1066 | FWD | 1901068 | 247  | 254  | 254  | RTS_R4+_614 |

|              |     |         |     |     |     |             |
|--------------|-----|---------|-----|-----|-----|-------------|
| TSS-FWD-1067 | FWD | 1901076 | 59  | 59  | 59  | RTS_R4+_614 |
| TSS-FWD-1068 | FWD | 1902743 |     | 7   | 15  | RTS_R4+_615 |
| TSS-FWD-1069 | FWD | 1903486 | 2   | 2   | 2   | RTS_R4+_616 |
| TSS-FWD-1070 | FWD | 1906179 |     |     | 2   | RTS_R4+_617 |
| TSS-FWD-1071 | FWD | 1906925 | 53  | 53  | 53  | RTS_R4+_618 |
| TSS-FWD-1072 | FWD | 1914178 | 41  | 41  | 41  | RTS_R4+_619 |
| TSS-FWD-1073 | FWD | 1914258 | 71  | 72  | 72  | RTS_R4+_619 |
| TSS-FWD-1074 | FWD | 1915436 | 110 | 110 | 110 | RTS_R4+_620 |
| TSS-FWD-1075 | FWD | 1918223 | 21  | 21  | 21  | RTS_R4+_621 |
| TSS-FWD-1076 | FWD | 1919749 | 12  | 12  | 17  | RTS_R4+_622 |
| TSS-FWD-1077 | FWD | 1920121 |     |     | 2   | RTS_R4+_623 |
| TSS-FWD-1078 | FWD | 1921090 | 8   | 10  | 41  | RTS_R4+_624 |
| TSS-FWD-1079 | FWD | 1923112 | 194 | 195 | 195 | RTS_R4+_625 |
| TSS-FWD-1080 | FWD | 1923413 | 26  | 27  | 31  | RTS_R4+_626 |
| TSS-FWD-1081 | FWD | 1924122 | 11  | 11  | 11  | RTS_R4+_627 |
| TSS-FWD-1082 | FWD | 1928881 | 147 | 147 | 147 | RTS_R4+_628 |
| TSS-FWD-1083 | FWD | 1934613 | 88  | 88  | 88  | RTS_R4+_629 |
| TSS-FWD-1084 | FWD | 1935526 | 41  | 41  | 41  | RTS_R4+_630 |
| TSS-FWD-1085 | FWD | 1935566 | 408 | 409 | 411 | RTS_R4+_630 |
| TSS-FWD-1086 | FWD | 1935571 | 269 | 271 | 271 | RTS_R4+_630 |
| TSS-FWD-1087 | FWD | 1940581 | 44  | 44  | 44  | RTS_R4+_631 |
| TSS-FWD-1088 | FWD | 1940614 | 31  | 31  | 31  | RTS_R4+_631 |
| TSS-FWD-1089 | FWD | 1940625 | 40  | 40  | 40  | RTS_R4+_631 |
| TSS-FWD-1090 | FWD | 1940658 | 10  | 10  | 16  | RTS_R4+_631 |
| TSS-FWD-1091 | FWD | 1944248 | 3   | 3   | 4   |             |
| TSS-FWD-1092 | FWD | 1948632 | 5   | 5   | 5   | RTS_R4+_632 |
| TSS-FWD-1093 | FWD | 1948794 | 4   | 4   | 4   | RTS_R4+_632 |
| TSS-FWD-1094 | FWD | 1950455 | 11  | 11  | 11  | RTS_R4+_633 |
| TSS-FWD-1095 | FWD | 1953581 |     | 1   | 1   | RTS_R4+_634 |
| TSS-FWD-1096 | FWD | 1958029 | 168 | 169 | 169 | RTS_R4+_635 |
| TSS-FWD-1097 | FWD | 1977320 | 11  | 11  | 11  | RTS_R4+_636 |
| TSS-FWD-1098 | FWD | 1977744 | 3   | 3   | 3   | RTS_R4+_637 |
| TSS-FWD-1099 | FWD | 1980567 | 13  | 13  | 13  | RTS_R4+_638 |
| TSS-FWD-1100 | FWD | 1984821 | 4   | 7   | 7   | RTS_R4+_639 |
| TSS-FWD-1101 | FWD | 1986706 | 200 | 242 | 244 | RTS_R4+_640 |
| TSS-FWD-1102 | FWD | 1986724 | 40  | 54  | 54  | RTS_R4+_640 |
| TSS-FWD-1103 | FWD | 1987667 | 50  | 52  | 52  | RTS_R4+_641 |
| TSS-FWD-1104 | FWD | 1993798 | 37  | 39  | 39  | RTS_R4+_642 |
| TSS-FWD-1105 | FWD | 1993814 | 27  | 27  | 27  | RTS_R4+_642 |
| TSS-FWD-1106 | FWD | 1994856 | 3   | 3   | 3   | RTS_R4+_643 |
| TSS-FWD-1107 | FWD | 1998511 | 2   | 2   | 3   | RTS_R4+_644 |
| TSS-FWD-1108 | FWD | 2001860 | 300 | 300 | 300 |             |
| TSS-FWD-1109 | FWD | 2001866 | 669 | 669 | 669 |             |
| TSS-FWD-1110 | FWD | 2004156 | 21  | 21  | 22  | RTS_R4+_645 |
| TSS-FWD-1111 | FWD | 2006264 | 17  | 17  | 17  | RTS_R4+_646 |
| TSS-FWD-1112 | FWD | 2007826 | 8   | 9   | 9   | RTS_R4+_647 |
| TSS-FWD-1113 | FWD | 2007831 | 9   | 9   | 10  | RTS_R4+_647 |
| TSS-FWD-1114 | FWD | 2008610 | 2   | 2   | 2   | RTS_R4+_648 |
| TSS-FWD-1115 | FWD | 2008621 |     | 2   | 2   | RTS_R4+_648 |
| TSS-FWD-1116 | FWD | 2011167 | 1   | 1   | 1   | RTS_R4+_649 |
| TSS-FWD-1117 | FWD | 2017609 | 23  | 23  | 23  | RTS_R4+_650 |
| TSS-FWD-1118 | FWD | 2018934 | 74  | 74  | 74  |             |
| TSS-FWD-1119 | FWD | 2021861 | 1   | 1   | 1   |             |
| TSS-FWD-1120 | FWD | 2022951 | 1   | 1   | 53  | RTS_R4+_651 |
| TSS-FWD-1121 | FWD | 2023477 | 17  | 17  | 17  | RTS_R4+_652 |
| TSS-FWD-1122 | FWD | 2032159 | 1   | 1   | 20  | RTS_R4+_653 |
| TSS-FWD-1123 | FWD | 2033655 | 60  | 60  | 61  | RTS_R4+_654 |
| TSS-FWD-1124 | FWD | 2033776 | 117 | 118 | 121 | RTS_R4+_654 |
| TSS-FWD-1125 | FWD | 2033785 | 76  | 77  | 96  | RTS_R4+_654 |
| TSS-FWD-1126 | FWD | 2033789 | 132 | 132 | 135 | RTS_R4+_654 |
| TSS-FWD-1127 | FWD | 2033804 | 98  | 117 | 117 | RTS_R4+_654 |
| TSS-FWD-1128 | FWD | 2036955 | 75  | 75  | 75  | RTS_R4+_655 |
| TSS-FWD-1129 | FWD | 2037773 | 192 | 194 | 250 | RTS_R4+_656 |

|              |     |         |      |      |      |             |
|--------------|-----|---------|------|------|------|-------------|
| TSS-FWD-1130 | FWD | 2039362 | 42   | 42   | 60   | RTS_R4+_657 |
| TSS-FWD-1131 | FWD | 2039368 | 2377 | 2381 | 2452 | RTS_R4+_657 |
| TSS-FWD-1132 | FWD | 2039374 | 313  | 313  | 316  | RTS_R4+_657 |
| TSS-FWD-1133 | FWD | 2039382 | 59   | 59   | 60   | RTS_R4+_657 |
| TSS-FWD-1134 | FWD | 2039935 | 60   | 60   | 63   | RTS_R4+_658 |
| TSS-FWD-1135 | FWD | 2041628 | 88   | 88   | 89   | RTS_R4+_659 |
| TSS-FWD-1136 | FWD | 2042462 | 32   | 32   | 32   | RTS_R4+_660 |
| TSS-FWD-1137 | FWD | 2047956 | 11   | 11   | 11   | RTS_R4+_661 |
| TSS-FWD-1138 | FWD | 2051590 | 95   | 97   | 97   | RTS_R4+_662 |
| TSS-FWD-1139 | FWD | 2053054 | 28   | 28   | 29   | RTS_R4+_663 |
| TSS-FWD-1140 | FWD | 2054822 | 1825 | 1825 | 1825 | RTS_R4+_664 |
| TSS-FWD-1141 | FWD | 2054830 | 69   | 69   | 69   | RTS_R4+_664 |
| TSS-FWD-1142 | FWD | 2054841 | 696  | 696  | 696  | RTS_R4+_664 |
| TSS-FWD-1143 | FWD | 2054850 | 47   | 47   | 47   | RTS_R4+_664 |
| TSS-FWD-1144 | FWD | 2054862 | 72   | 72   | 72   | RTS_R4+_664 |
| TSS-FWD-1145 | FWD | 2057875 | 12   | 12   | 12   | RTS_R4+_665 |
| TSS-FWD-1146 | FWD | 2066552 | 16   | 16   | 16   | RTS_R4+_667 |
| TSS-FWD-1147 | FWD | 2068330 | 2    | 2    | 2    | RTS_R4+_669 |
| TSS-FWD-1148 | FWD | 2068543 | 8    | 8    | 8    | RTS_R4+_670 |
| TSS-FWD-1149 | FWD | 2069348 | 20   | 20   | 21   | RTS_R4+_671 |
| TSS-FWD-1150 | FWD | 2069496 | 202  | 202  | 202  | RTS_R4+_672 |
| TSS-FWD-1151 | FWD | 2069533 | 13   | 13   | 13   | RTS_R4+_672 |
| TSS-FWD-1152 | FWD | 2074114 | 5    | 5    | 5    |             |
| TSS-FWD-1153 | FWD | 2076053 | 4    | 5    | 5    | RTS_R4+_673 |
| TSS-FWD-1154 | FWD | 2080756 | 144  | 144  | 144  | RTS_R4+_674 |
| TSS-FWD-1155 | FWD | 2087989 | 661  | 680  | 682  | RTS_R4+_675 |
| TSS-FWD-1156 | FWD | 2088018 | 838  | 849  | 852  | RTS_R4+_675 |
| TSS-FWD-1157 | FWD | 2088157 | 34   | 34   | 34   | RTS_R4+_676 |
| TSS-FWD-1158 | FWD | 2088187 | 46   | 46   | 46   | RTS_R4+_676 |
| TSS-FWD-1159 | FWD | 2088197 | 211  | 211  | 211  | RTS_R4+_676 |
| TSS-FWD-1160 | FWD | 2094440 | 64   | 64   | 64   | RTS_R4+_677 |
| TSS-FWD-1161 | FWD | 2094579 | 52   | 52   | 52   | RTS_R4+_677 |
| TSS-FWD-1162 | FWD | 2135887 | 1    | 1    | 4    | RTS_R4+_678 |
| TSS-FWD-1163 | FWD | 2137557 |      | 9    | 24   | RTS_R4+_679 |
| TSS-FWD-1164 | FWD | 2141248 | 16   | 17   | 17   | RTS_R4+_680 |
| TSS-FWD-1165 | FWD | 2141382 | 21   | 21   | 21   | RTS_R4+_680 |
| TSS-FWD-1166 | FWD | 2145873 | 6    | 6    | 6    | RTS_R4+_681 |
| TSS-FWD-1167 | FWD | 2151335 | 8    | 8    | 10   | RTS_R4+_682 |
| TSS-FWD-1168 | FWD | 2151670 | 2    | 76   | 183  | RTS_R4+_683 |
| TSS-FWD-1169 | FWD | 2152003 | 3    | 9    | 20   | RTS_R4+_684 |
| TSS-FWD-1170 | FWD | 2159215 | 6    | 6    | 6    | RTS_R4+_685 |
| TSS-FWD-1171 | FWD | 2159276 | 5    | 5    | 5    | RTS_R4+_685 |
| TSS-FWD-1172 | FWD | 2162220 | 15   | 15   | 15   | RTS_R4+_686 |
| TSS-FWD-1173 | FWD | 2163156 | 116  | 118  | 145  | RTS_R4+_687 |
| TSS-FWD-1174 | FWD | 2163618 | 17   | 18   | 18   | RTS_R4+_688 |
| TSS-FWD-1175 | FWD | 2165138 | 56   | 326  | 1515 | RTS_R4+_689 |
| TSS-FWD-1176 | FWD | 2166709 | 207  | 207  | 208  | RTS_R4+_690 |
| TSS-FWD-1177 | FWD | 2183945 | 1    | 1    | 1    | RTS_R4+_692 |
| TSS-FWD-1178 | FWD | 2183960 | 1    | 1    | 1    | RTS_R4+_692 |
| TSS-FWD-1179 | FWD | 2184884 | 33   | 34   | 34   | RTS_R4+_693 |
| TSS-FWD-1180 | FWD | 2184935 | 29   | 29   | 31   | RTS_R4+_693 |
| TSS-FWD-1181 | FWD | 2192291 | 23   | 31   | 32   | RTS_R4+_694 |
| TSS-FWD-1182 | FWD | 2212711 | 4    | 5    | 5    | RTS_R4+_695 |
| TSS-FWD-1183 | FWD | 2213656 | 2    | 2    | 2    | RTS_R4+_696 |
| TSS-FWD-1184 | FWD | 2216103 |      |      | 1    | RTS_R4+_697 |
| TSS-FWD-1185 | FWD | 2220176 | 133  | 134  | 135  | RTS_R4+_698 |
| TSS-FWD-1186 | FWD | 2223799 | 13   | 14   | 15   | RTS_R4+_699 |
| TSS-FWD-1187 | FWD | 2226980 | 4    | 4    | 34   | RTS_R4+_700 |
| TSS-FWD-1188 | FWD | 2228625 | 10   | 22   | 22   | RTS_R4+_701 |
| TSS-FWD-1189 | FWD | 2229842 | 12   | 13   | 13   | RTS_R4+_702 |
| TSS-FWD-1190 | FWD | 2230872 | 18   | 18   | 18   | RTS_R4+_703 |
| TSS-FWD-1191 | FWD | 2232004 | 7    | 16   | 17   | RTS_R4+_704 |
| TSS-FWD-1192 | FWD | 2232009 | 16   | 19   | 21   | RTS_R4+_704 |

|              |     |         |      |      |       |             |
|--------------|-----|---------|------|------|-------|-------------|
| TSS-FWD-1193 | FWD | 2241903 | 517  | 517  | 517   | RTS_R4+_705 |
| TSS-FWD-1194 | FWD | 2247690 | 9    | 9    | 9     | RTS_R4+_706 |
| TSS-FWD-1195 | FWD | 2248828 | 88   | 88   | 88    | RTS_R4+_707 |
| TSS-FWD-1196 | FWD | 2253259 | 2    | 2    | 2     |             |
| TSS-FWD-1197 | FWD | 2262767 | 6    | 6    | 6     | RTS_R4+_708 |
| TSS-FWD-1198 | FWD | 2263437 | 1308 | 1309 | 1309  | RTS_R4+_709 |
| TSS-FWD-1199 | FWD | 2263442 | 307  | 307  | 307   | RTS_R4+_709 |
| TSS-FWD-1200 | FWD | 2263448 | 192  | 192  | 192   | RTS_R4+_709 |
| TSS-FWD-1201 | FWD | 2263464 | 56   | 56   | 56    | RTS_R4+_709 |
| TSS-FWD-1202 | FWD | 2264236 | 11   | 12   | 14    | RTS_R4+_710 |
| TSS-FWD-1203 | FWD | 2265820 | 29   | 29   | 29    | RTS_R4+_711 |
| TSS-FWD-1204 | FWD | 2267942 | 84   | 106  | 114   | RTS_R4+_712 |
| TSS-FWD-1205 | FWD | 2267949 | 50   | 51   | 51    | RTS_R4+_712 |
| TSS-FWD-1206 | FWD | 2267996 | 109  | 109  | 109   | RTS_R4+_712 |
| TSS-FWD-1207 | FWD | 2268700 | 27   | 27   | 27    | RTS_R4+_713 |
| TSS-FWD-1208 | FWD | 2270390 | 5    | 5    | 5     | RTS_R4+_714 |
| TSS-FWD-1209 | FWD | 2271987 | 22   | 22   | 22    | RTS_R4+_715 |
| TSS-FWD-1210 | FWD | 2273017 | 26   | 26   | 26    | RTS_R4+_716 |
| TSS-FWD-1211 | FWD | 2273178 | 23   | 23   | 23    | RTS_R4+_716 |
| TSS-FWD-1212 | FWD | 2276513 | 11   | 11   | 11    | RTS_R4+_717 |
| TSS-FWD-1213 | FWD | 2278630 | 10   | 10   | 10    | RTS_R4+_718 |
| TSS-FWD-1214 | FWD | 2280402 | 2    | 2    | 2     | RTS_R4+_719 |
| TSS-FWD-1215 | FWD | 2282124 | 20   | 21   | 22    | RTS_R4+_720 |
| TSS-FWD-1216 | FWD | 2284233 | 8411 | 8876 | 10505 | RTS_R4+_721 |
| TSS-FWD-1217 | FWD | 2288371 | 44   | 44   | 44    | RTS_R4+_722 |
| TSS-FWD-1218 | FWD | 2288391 | 36   | 36   | 36    | RTS_R4+_722 |
| TSS-FWD-1219 | FWD | 2288444 | 1    | 4    | 4     | RTS_R4+_722 |
| TSS-FWD-1220 | FWD | 2301615 |      |      | 4     | RTS_R4+_723 |
| TSS-FWD-1221 | FWD | 2301894 | 16   | 16   | 16    | RTS_R4+_724 |
| TSS-FWD-1222 | FWD | 2307005 |      | 2    | 2     | RTS_R4+_725 |
| TSS-FWD-1223 | FWD | 2311106 | 51   | 64   | 124   | RTS_R4+_726 |
| TSS-FWD-1224 | FWD | 2311474 | 46   | 46   | 46    | RTS_R4+_727 |
| TSS-FWD-1225 | FWD | 2314084 | 2029 | 2029 | 2029  | RTS_R4+_728 |
| TSS-FWD-1226 | FWD | 2314140 | 435  | 437  | 437   | RTS_R4+_728 |
| TSS-FWD-1227 | FWD | 2318037 |      |      | 1     | RTS_R4+_729 |
| TSS-FWD-1228 | FWD | 2337562 | 62   | 75   | 75    | RTS_R4+_730 |
| TSS-FWD-1229 | FWD | 2339227 |      | 2    | 2     | RTS_R4+_731 |
| TSS-FWD-1230 | FWD | 2342780 | 175  | 175  | 175   | RTS_R4+_732 |
| TSS-FWD-1231 | FWD | 2345374 | 41   | 42   | 42    | RTS_R4+_733 |
| TSS-FWD-1232 | FWD | 2347962 | 10   | 10   | 10    | RTS_R4+_734 |
| TSS-FWD-1233 | FWD | 2350615 | 2    | 2    | 2     | RTS_R4+_735 |
| TSS-FWD-1234 | FWD | 2355575 | 26   | 26   | 26    | RTS_R4+_736 |
| TSS-FWD-1235 | FWD | 2362549 | 13   | 13   | 13    | RTS_R4+_737 |
| TSS-FWD-1236 | FWD | 2363738 | 3    | 4    | 8     | RTS_R4+_738 |
| TSS-FWD-1237 | FWD | 2367286 | 10   | 10   | 10    | RTS_R4+_739 |
| TSS-FWD-1238 | FWD | 2367400 | 7    | 7    | 7     | RTS_R4+_739 |
| TSS-FWD-1239 | FWD | 2370154 | 3    | 3    | 3     | RTS_R4+_740 |
| TSS-FWD-1240 | FWD | 2379604 | 60   | 60   | 60    | RTS_R4+_741 |
| TSS-FWD-1241 | FWD | 2379610 | 41   | 41   | 41    | RTS_R4+_741 |
| TSS-FWD-1242 | FWD | 2383830 | 3    | 3    | 3     |             |
| TSS-FWD-1243 | FWD | 2386595 | 2    | 2    | 2     | RTS_R4+_742 |
| TSS-FWD-1244 | FWD | 2405531 | 19   | 19   | 19    | RTS_R4+_743 |
| TSS-FWD-1245 | FWD | 2406858 | 48   | 50   | 50    | RTS_R4+_744 |
| TSS-FWD-1246 | FWD | 2411366 | 145  | 145  | 145   | RTS_R4+_745 |
| TSS-FWD-1247 | FWD | 2411459 | 86   | 86   | 87    | RTS_R4+_745 |
| TSS-FWD-1248 | FWD | 2412727 | 100  | 100  | 101   | RTS_R4+_746 |
| TSS-FWD-1249 | FWD | 2418614 | 20   | 20   | 26    | RTS_R4+_748 |
| TSS-FWD-1250 | FWD | 2419323 | 1329 | 1340 | 1340  | RTS_R4+_749 |
| TSS-FWD-1251 | FWD | 2419630 | 38   | 39   | 40    | RTS_R4+_750 |
| TSS-FWD-1252 | FWD | 2435951 | 1    | 1    | 1     | RTS_R4+_751 |
| TSS-FWD-1253 | FWD | 2439761 | 6    | 6    | 6     | RTS_R4+_752 |
| TSS-FWD-1254 | FWD | 2446603 | 113  | 113  | 113   | RTS_R4+_753 |
| TSS-FWD-1255 | FWD | 2459227 |      |      | 33    | RTS_R4+_754 |

|              |     |         |      |      |      |             |
|--------------|-----|---------|------|------|------|-------------|
| TSS-FWD-1256 | FWD | 2463296 | 11   | 12   | 13   | RTS_R4+_755 |
| TSS-FWD-1257 | FWD | 2464331 | 257  | 312  | 630  | RTS_R4+_756 |
| TSS-FWD-1258 | FWD | 2464537 | 5    | 5    | 5    | RTS_R4+_757 |
| TSS-FWD-1259 | FWD | 2464558 | 6    | 6    | 6    | RTS_R4+_757 |
| TSS-FWD-1260 | FWD | 2465852 | 439  | 439  | 439  | RTS_R4+_758 |
| TSS-FWD-1261 | FWD | 2465858 | 71   | 71   | 71   | RTS_R4+_758 |
| TSS-FWD-1262 | FWD | 2467044 | 61   | 61   | 61   | RTS_R4+_759 |
| TSS-FWD-1263 | FWD | 2467055 | 41   | 41   | 41   | RTS_R4+_759 |
| TSS-FWD-1264 | FWD | 2468770 | 8    | 12   | 108  | RTS_R4+_760 |
| TSS-FWD-1265 | FWD | 2477127 | 18   | 18   | 18   | RTS_R4+_762 |
| TSS-FWD-1266 | FWD | 2477132 | 22   | 22   | 22   | RTS_R4+_762 |
| TSS-FWD-1267 | FWD | 2481652 | 344  | 344  | 346  | RTS_R4+_763 |
| TSS-FWD-1268 | FWD | 2481663 | 129  | 130  | 130  | RTS_R4+_763 |
| TSS-FWD-1269 | FWD | 2483950 | 67   | 67   | 67   | RTS_R4+_764 |
| TSS-FWD-1270 | FWD | 2493621 | 2    | 2    | 2    | RTS_R4+_765 |
| TSS-FWD-1271 | FWD | 2494819 | 35   | 38   | 38   | RTS_R4+_766 |
| TSS-FWD-1272 | FWD | 2496668 | 4    | 4    | 4    | RTS_R4+_767 |
| TSS-FWD-1273 | FWD | 2499128 | 7    | 7    | 7    | RTS_R4+_768 |
| TSS-FWD-1274 | FWD | 2507477 | 7    | 7    | 9    | RTS_R4+_769 |
| TSS-FWD-1275 | FWD | 2508983 | 6    | 6    | 6    | RTS_R4+_770 |
| TSS-FWD-1276 | FWD | 2510904 | 64   | 64   | 64   | RTS_R4+_771 |
| TSS-FWD-1277 | FWD | 2511000 | 161  | 161  | 161  | RTS_R4+_771 |
| TSS-FWD-1278 | FWD | 2511032 | 131  | 131  | 131  | RTS_R4+_771 |
| TSS-FWD-1279 | FWD | 2512273 | 8    | 8    | 8    | RTS_R4+_772 |
| TSS-FWD-1280 | FWD | 2516429 | 53   | 53   | 55   | RTS_R4+_773 |
| TSS-FWD-1281 | FWD | 2516468 | 17   | 17   | 17   | RTS_R4+_773 |
| TSS-FWD-1282 | FWD | 2518953 | 3    | 12   | 17   | RTS_R4+_774 |
| TSS-FWD-1283 | FWD | 2523196 | 1    | 1    | 1    | RTS_R4+_775 |
| TSS-FWD-1284 | FWD | 2524948 | 154  | 155  | 158  | RTS_R4+_776 |
| TSS-FWD-1285 | FWD | 2529446 | 118  | 118  | 118  | RTS_R4+_777 |
| TSS-FWD-1286 | FWD | 2530399 | 537  | 537  | 537  | RTS_R4+_778 |
| TSS-FWD-1287 | FWD | 2530408 | 5098 | 5098 | 5098 | RTS_R4+_778 |
| TSS-FWD-1288 | FWD | 2530418 | 946  | 946  | 946  | RTS_R4+_778 |
| TSS-FWD-1289 | FWD | 2531523 | 885  | 888  | 888  | RTS_R4+_779 |
| TSS-FWD-1290 | FWD | 2531529 | 181  | 182  | 182  | RTS_R4+_779 |
| TSS-FWD-1291 | FWD | 2531614 | 211  | 211  | 211  | RTS_R4+_779 |
| TSS-FWD-1292 | FWD | 2531617 | 200  | 207  | 207  | RTS_R4+_779 |
| TSS-FWD-1293 | FWD | 2531710 | 259  | 260  | 260  | RTS_R4+_779 |
| TSS-FWD-1294 | FWD | 2531713 | 5702 | 5715 | 5715 | RTS_R4+_779 |
| TSS-FWD-1295 | FWD | 2531754 | 116  | 116  | 116  | RTS_R4+_779 |
| TSS-FWD-1296 | FWD | 2531757 | 291  | 293  | 293  | RTS_R4+_779 |
| TSS-FWD-1297 | FWD | 2531761 | 156  | 156  | 156  | RTS_R4+_779 |
| TSS-FWD-1298 | FWD | 2533502 | 8    | 8    | 8    | RTS_R4+_780 |
| TSS-FWD-1299 | FWD | 2533632 | 3    | 5    | 49   | RTS_R4+_780 |
| TSS-FWD-1300 | FWD | 2533789 | 946  | 1002 | 1018 | RTS_R4+_780 |
| TSS-FWD-1301 | FWD | 2533815 | 46   | 48   | 53   | RTS_R4+_780 |
| TSS-FWD-1302 | FWD | 2533834 | 72   | 72   | 72   | RTS_R4+_780 |
| TSS-FWD-1303 | FWD | 2535337 | 68   | 68   | 68   | RTS_R4+_781 |
| TSS-FWD-1304 | FWD | 2535779 | 3    | 3    | 3    | RTS_R4+_782 |
| TSS-FWD-1305 | FWD | 2543753 | 37   | 37   | 37   | RTS_R4+_784 |
| TSS-FWD-1306 | FWD | 2543763 | 38   | 38   | 38   | RTS_R4+_784 |
| TSS-FWD-1307 | FWD | 2546310 | 2    | 2    | 2    | RTS_R4+_785 |
| TSS-FWD-1308 | FWD | 2550264 | 81   | 81   | 81   | RTS_R4+_786 |
| TSS-FWD-1309 | FWD | 2550301 | 48   | 49   | 49   | RTS_R4+_786 |
| TSS-FWD-1310 | FWD | 2555334 | 2    | 2    | 3    | RTS_R4+_787 |
| TSS-FWD-1311 | FWD | 2556798 | 17   | 17   | 17   | RTS_R4+_788 |
| TSS-FWD-1312 | FWD | 2558357 | 14   | 14   | 14   | RTS_R4+_789 |
| TSS-FWD-1313 | FWD | 2558413 | 18   | 18   | 18   | RTS_R4+_789 |
| TSS-FWD-1314 | FWD | 2560064 | 6    | 6    | 6    | RTS_R4+_790 |
| TSS-FWD-1315 | FWD | 2561495 |      | 14   | 14   | RTS_R4+_791 |
| TSS-FWD-1316 | FWD | 2561969 | 50   | 51   | 51   | RTS_R4+_792 |
| TSS-FWD-1317 | FWD | 2561982 | 42   | 47   | 48   | RTS_R4+_792 |
| TSS-FWD-1318 | FWD | 2562517 | 17   | 20   | 21   | RTS_R4+_793 |

|              |     |         |      |      |      |             |
|--------------|-----|---------|------|------|------|-------------|
| TSS-FWD-1319 | FWD | 2576628 | 182  | 182  | 183  | RTS_R4+_795 |
| TSS-FWD-1320 | FWD | 2576664 | 52   | 52   | 52   | RTS_R4+_795 |
| TSS-FWD-1321 | FWD | 2583542 | 6    | 6    | 6    | RTS_R4+_796 |
| TSS-FWD-1322 | FWD | 2583590 | 3    | 8    | 10   | RTS_R4+_796 |
| TSS-FWD-1323 | FWD | 2585611 | 4    | 4    | 4    | RTS_R4+_797 |
| TSS-FWD-1324 | FWD | 2589198 | 77   | 77   | 77   | RTS_R4+_798 |
| TSS-FWD-1325 | FWD | 2589582 | 47   | 47   | 47   | RTS_R4+_799 |
| TSS-FWD-1326 | FWD | 2590733 | 10   | 12   | 29   | RTS_R4+_800 |
| TSS-FWD-1327 | FWD | 2594784 | 19   | 24   | 28   | RTS_R4+_801 |
| TSS-FWD-1328 | FWD | 2597901 | 113  | 113  | 116  | RTS_R4+_802 |
| TSS-FWD-1329 | FWD | 2598431 | 313  | 313  | 313  | RTS_R4+_803 |
| TSS-FWD-1330 | FWD | 2598450 | 109  | 109  | 110  | RTS_R4+_803 |
| TSS-FWD-1331 | FWD | 2598459 | 99   | 99   | 99   | RTS_R4+_803 |
| TSS-FWD-1332 | FWD | 2598466 | 115  | 115  | 115  | RTS_R4+_803 |
| TSS-FWD-1333 | FWD | 2614048 |      | 1    | 1    | RTS_R4+_804 |
| TSS-FWD-1334 | FWD | 2614090 | 3    | 3    | 3    | RTS_R4+_804 |
| TSS-FWD-1335 | FWD | 2619175 | 174  | 174  | 174  | RTS_R4+_805 |
| TSS-FWD-1336 | FWD | 2620970 | 14   | 14   | 14   | RTS_R4+_806 |
| TSS-FWD-1337 | FWD | 2620980 | 13   | 14   | 14   | RTS_R4+_806 |
| TSS-FWD-1338 | FWD | 2626040 |      |      | 1    | RTS_R4+_807 |
| TSS-FWD-1339 | FWD | 2627274 | 63   | 66   | 67   | RTS_R4+_808 |
| TSS-FWD-1340 | FWD | 2627785 | 11   | 12   | 12   | RTS_R4+_809 |
| TSS-FWD-1341 | FWD | 2632219 | 386  | 390  | 390  | RTS_R4+_810 |
| TSS-FWD-1342 | FWD | 2650491 | 20   | 20   | 22   | RTS_R4+_811 |
| TSS-FWD-1343 | FWD | 2651867 | 5    | 5    | 5    | RTS_R4+_812 |
| TSS-FWD-1344 | FWD | 2661428 | 373  | 373  | 373  | RTS_R4+_813 |
| TSS-FWD-1345 | FWD | 2661437 | 315  | 315  | 315  | RTS_R4+_813 |
| TSS-FWD-1346 | FWD | 2663423 | 10   | 10   | 10   | RTS_R4+_814 |
| TSS-FWD-1347 | FWD | 2666220 |      |      | 1    | RTS_R4+_815 |
| TSS-FWD-1348 | FWD | 2667041 | 4    | 4    | 4    | RTS_R4+_816 |
| TSS-FWD-1349 | FWD | 2671343 | 142  | 145  | 152  | RTS_R4+_817 |
| TSS-FWD-1350 | FWD | 2680827 | 15   | 15   | 15   | RTS_R4+_818 |
| TSS-FWD-1351 | FWD | 2682044 | 2    | 2    | 2    | RTS_R4+_819 |
| TSS-FWD-1352 | FWD | 2683819 | 190  | 192  | 195  | RTS_R4+_820 |
| TSS-FWD-1353 | FWD | 2683831 | 33   | 33   | 33   | RTS_R4+_820 |
| TSS-FWD-1354 | FWD | 2693782 | 20   | 20   | 20   | RTS_R4+_821 |
| TSS-FWD-1355 | FWD | 2696762 | 5    | 7    | 7    | RTS_R4+_822 |
| TSS-FWD-1356 | FWD | 2697658 | 11   | 11   | 11   | RTS_R4+_823 |
| TSS-FWD-1357 | FWD | 2697678 | 11   | 11   | 11   | RTS_R4+_823 |
| TSS-FWD-1358 | FWD | 2708414 | 124  | 126  | 126  | RTS_R4+_824 |
| TSS-FWD-1359 | FWD | 2710900 | 14   | 18   | 19   | RTS_R4+_825 |
| TSS-FWD-1360 | FWD | 2714752 | 68   | 69   | 69   | RTS_R4+_826 |
| TSS-FWD-1361 | FWD | 2716697 | 133  | 138  | 143  | RTS_R4+_827 |
| TSS-FWD-1362 | FWD | 2717227 | 9    | 9    | 9    | RTS_R4+_828 |
| TSS-FWD-1363 | FWD | 2720309 | 52   | 53   | 56   | RTS_R4+_829 |
| TSS-FWD-1364 | FWD | 2720643 | 55   | 55   | 56   | RTS_R4+_830 |
| TSS-FWD-1365 | FWD | 2720648 | 51   | 52   | 52   | RTS_R4+_830 |
| TSS-FWD-1366 | FWD | 2720691 | 222  | 222  | 222  | RTS_R4+_830 |
| TSS-FWD-1367 | FWD | 2723856 | 98   | 98   | 98   | RTS_R4+_831 |
| TSS-FWD-1368 | FWD | 2733982 | 24   | 24   | 24   | RTS_R4+_832 |
| TSS-FWD-1369 | FWD | 2734095 | 359  | 366  | 366  | RTS_R4+_832 |
| TSS-FWD-1370 | FWD | 2734107 | 68   | 74   | 76   | RTS_R4+_832 |
| TSS-FWD-1371 | FWD | 2734135 | 53   | 53   | 53   | RTS_R4+_832 |
| TSS-FWD-1372 | FWD | 2735146 | 1205 | 4094 | 4436 | RTS_R4+_833 |
| TSS-FWD-1373 | FWD | 2735152 | 35   | 203  | 222  | RTS_R4+_833 |
| TSS-FWD-1374 | FWD | 2735602 | 177  | 178  | 183  | RTS_R4+_834 |
| TSS-FWD-1375 | FWD | 2739371 | 18   | 18   | 20   | RTS_R4+_835 |
| TSS-FWD-1376 | FWD | 2739846 | 130  | 133  | 134  | RTS_R4+_836 |
| TSS-FWD-1377 | FWD | 2745953 | 13   | 13   | 13   | RTS_R4+_837 |
| TSS-FWD-1378 | FWD | 2748759 | 9    | 9    | 9    | RTS_R4+_838 |
| TSS-FWD-1379 | FWD | 2748788 | 15   | 15   | 15   | RTS_R4+_838 |
| TSS-FWD-1380 | FWD | 2749782 | 32   | 32   | 32   | RTS_R4+_839 |
| TSS-FWD-1381 | FWD | 2749795 | 19   | 20   | 20   | RTS_R4+_839 |

|              |     |         |        |        |        |             |
|--------------|-----|---------|--------|--------|--------|-------------|
| TSS-FWD-1382 | FWD | 2751510 | 11     | 12     | 12     | RTS_R4+_840 |
| TSS-FWD-1383 | FWD | 2751542 | 40     | 40     | 40     | RTS_R4+_840 |
| TSS-FWD-1384 | FWD | 2751577 | 214    | 229    | 233    | RTS_R4+_840 |
| TSS-FWD-1385 | FWD | 2751616 | 303    | 322    | 322    | RTS_R4+_840 |
| TSS-FWD-1386 | FWD | 2752854 | 32     | 32     | 32     | RTS_R4+_841 |
| TSS-FWD-1387 | FWD | 2752896 | 23     | 23     | 23     | RTS_R4+_841 |
| TSS-FWD-1388 | FWD | 2753615 | 610576 | 631373 | 670348 | RTS_R4+_842 |
| TSS-FWD-1389 | FWD | 2754155 | 21     | 21     | 21     | RTS_R4+_843 |
| TSS-FWD-1390 | FWD | 2754190 | 23     | 23     | 23     | RTS_R4+_843 |
| TSS-FWD-1391 | FWD | 2756635 | 8      | 8      | 8      |             |
| TSS-FWD-1392 | FWD | 2763238 |        |        | 2      | RTS_R4+_845 |
| TSS-FWD-1393 | FWD | 2763916 | 248    | 249    | 249    | RTS_R4+_846 |
| TSS-FWD-1394 | FWD | 2763922 | 184    | 187    | 187    | RTS_R4+_846 |
| TSS-FWD-1395 | FWD | 2764659 | 24     | 24     | 24     | RTS_R4+_847 |
| TSS-FWD-1396 | FWD | 2764729 |        |        | 1      | RTS_R4+_847 |
| TSS-FWD-1397 | FWD | 2769830 | 34     | 34     | 34     | RTS_R4+_849 |
| TSS-FWD-1398 | FWD | 2771308 | 5      | 5      | 5      | RTS_R4+_850 |
| TSS-FWD-1399 | FWD | 2773413 |        | 1      | 2      | RTS_R4+_851 |
| TSS-FWD-1400 | FWD | 2775809 | 32     | 32     | 32     | RTS_R4+_852 |
| TSS-FWD-1401 | FWD | 2776786 |        | 2      | 2      | RTS_R4+_853 |
| TSS-FWD-1402 | FWD | 2786949 | 8      | 8      | 31     | RTS_R4+_854 |
| TSS-FWD-1403 | FWD | 2788933 |        |        | 3      | RTS_R4+_855 |
| TSS-FWD-1404 | FWD | 2788948 | 2      | 2      | 5      | RTS_R4+_855 |
| TSS-FWD-1405 | FWD | 2793646 | 5      | 5      | 5      | RTS_R4+_856 |
| TSS-FWD-1406 | FWD | 2795209 | 158    | 161    | 161    | RTS_R4+_857 |
| TSS-FWD-1407 | FWD | 2795219 | 65     | 67     | 68     | RTS_R4+_857 |
| TSS-FWD-1408 | FWD | 2797144 |        | 11     | 11     | RTS_R4+_858 |
| TSS-FWD-1409 | FWD | 2798143 | 154    | 158    | 164    | RTS_R4+_859 |
| TSS-FWD-1410 | FWD | 2798150 | 218    | 219    | 233    | RTS_R4+_859 |
| TSS-FWD-1411 | FWD | 2798678 | 30     | 32     | 45     | RTS_R4+_860 |
| TSS-FWD-1412 | FWD | 2802587 | 5      | 5      | 5      | RTS_R4+_861 |
| TSS-FWD-1413 | FWD | 2802771 | 13     | 13     | 13     | RTS_R4+_861 |
| TSS-FWD-1414 | FWD | 2802782 | 20     | 21     | 21     | RTS_R4+_861 |
| TSS-FWD-1415 | FWD | 2807591 | 827    | 831    | 831    | RTS_R4+_862 |
| TSS-FWD-1416 | FWD | 2807602 | 72     | 75     | 75     | RTS_R4+_862 |
| TSS-FWD-1417 | FWD | 2807710 | 15     | 15     | 15     | RTS_R4+_862 |
| TSS-FWD-1418 | FWD | 2808717 | 856    | 856    | 856    | RTS_R4+_863 |
| TSS-FWD-1419 | FWD | 2808741 | 992    | 1002   | 1003   | RTS_R4+_863 |
| TSS-FWD-1420 | FWD | 2808755 | 70     | 71     | 71     | RTS_R4+_863 |
| TSS-FWD-1421 | FWD | 2808768 | 12     | 12     | 12     | RTS_R4+_863 |
| TSS-FWD-1422 | FWD | 2809360 | 39     | 39     | 39     | RTS_R4+_864 |
| TSS-FWD-1423 | FWD | 2812824 | 61     | 74     | 429    | RTS_R4+_865 |
| TSS-FWD-1424 | FWD | 2823750 | 3      | 3      | 3      | RTS_R4+_866 |
| TSS-FWD-1425 | FWD | 2823813 |        | 1      | 3      | RTS_R4+_866 |
| TSS-FWD-1426 | FWD | 2826984 | 93     | 93     | 93     | RTS_R4+_867 |
| TSS-FWD-1427 | FWD | 2827732 | 23     | 24     | 24     | RTS_R4+_868 |
| TSS-FWD-1428 | FWD | 2830462 | 2      | 2      | 2      | RTS_R4+_869 |
| TSS-FWD-1429 | FWD | 2835275 | 5      | 5      | 5      | RTS_R4+_870 |
| TSS-FWD-1430 | FWD | 2837449 | 1      | 1      | 1      | RTS_R4+_871 |
| TSS-FWD-1431 | FWD | 2848861 | 26     | 26     | 26     | RTS_R4+_872 |
| TSS-FWD-1432 | FWD | 2850757 | 1      | 1      | 1      | RTS_R4+_873 |
| TSS-FWD-1433 | FWD | 2852316 | 8      | 8      | 8      | RTS_R4+_874 |
| TSS-FWD-1434 | FWD | 2852323 | 8      | 8      | 9      | RTS_R4+_874 |
| TSS-FWD-1435 | FWD | 2855046 | 155    | 156    | 156    | RTS_R4+_875 |
| TSS-FWD-1436 | FWD | 2855085 | 37     | 37     | 37     | RTS_R4+_875 |
| TSS-FWD-1437 | FWD | 2855105 | 22     | 22     | 22     | RTS_R4+_875 |
| TSS-FWD-1438 | FWD | 2855132 | 229    | 230    | 230    | RTS_R4+_875 |
| TSS-FWD-1439 | FWD | 2859414 |        | 2      | 34     | RTS_R4+_876 |
| TSS-FWD-1440 | FWD | 2865777 | 2      | 2      | 2      | RTS_R4+_877 |
| TSS-FWD-1441 | FWD | 2874569 | 11     | 11     | 11     | RTS_R4+_878 |
| TSS-FWD-1442 | FWD | 2890212 | 61     | 62     | 62     | RTS_R4+_879 |
| TSS-FWD-1443 | FWD | 2902008 | 3      | 3      | 7      | RTS_R4+_880 |
| TSS-FWD-1444 | FWD | 2912910 | 3      | 3      | 3      | RTS_R4+_881 |

|              |     |         |      |      |      |             |
|--------------|-----|---------|------|------|------|-------------|
| TSS-FWD-1445 | FWD | 2923341 | 30   | 30   | 30   | RTS_R4+_882 |
| TSS-FWD-1446 | FWD | 2924294 | 191  | 191  | 224  | RTS_R4+_883 |
| TSS-FWD-1447 | FWD | 2926172 | 23   | 24   | 24   | RTS_R4+_884 |
| TSS-FWD-1448 | FWD | 2926178 | 36   | 37   | 37   | RTS_R4+_884 |
| TSS-FWD-1449 | FWD | 2926223 | 118  | 120  | 120  | RTS_R4+_884 |
| TSS-FWD-1450 | FWD | 2936466 | 6    | 6    | 6    | RTS_R4+_885 |
| TSS-FWD-1451 | FWD | 2936671 | 8    | 10   | 10   | RTS_R4+_885 |
| TSS-FWD-1452 | FWD | 2940718 | 206  | 208  | 208  | RTS_R4+_886 |
| TSS-FWD-1453 | FWD | 2941341 | 34   | 34   | 34   | RTS_R4+_887 |
| TSS-FWD-1454 | FWD | 2942505 | 32   | 32   | 34   | RTS_R4+_888 |
| TSS-FWD-1455 | FWD | 2945409 | 2280 | 2437 | 2597 | RTS_R4+_890 |
| TSS-FWD-1456 | FWD | 2947233 | 799  | 817  | 817  | RTS_R4+_891 |
| TSS-FWD-1457 | FWD | 2947241 | 198  | 206  | 206  | RTS_R4+_891 |
| TSS-FWD-1458 | FWD | 2967638 | 33   | 36   | 36   | RTS_R4+_892 |
| TSS-FWD-1459 | FWD | 2968416 | 29   | 29   | 29   | RTS_R4+_893 |
| TSS-FWD-1460 | FWD | 2969260 | 195  | 206  | 215  | RTS_R4+_894 |
| TSS-FWD-1461 | FWD | 2969272 | 165  | 165  | 187  | RTS_R4+_894 |
| TSS-FWD-1462 | FWD | 2969587 | 489  | 492  | 507  | RTS_R4+_895 |
| TSS-FWD-1463 | FWD | 2974591 | 61   | 61   | 61   | RTS_R4+_896 |
| TSS-FWD-1464 | FWD | 2976932 | 6    | 6    | 6    | RTS_R4+_897 |
| TSS-FWD-1465 | FWD | 2980467 | 18   | 18   | 18   | RTS_R4+_898 |
| TSS-FWD-1466 | FWD | 2983673 | 5    | 5    | 5    |             |
| TSS-FWD-1467 | FWD | 2985533 | 9    | 10   | 10   |             |
| TSS-FWD-1468 | FWD | 2988440 | 2    | 2    | 2    |             |
| TSS-FWD-1469 | FWD | 2990004 | 1    | 1    | 1    |             |
| TSS-FWD-1470 | FWD | 2991615 | 4    | 5    | 10   |             |
| TSS-FWD-1471 | FWD | 2998296 | 4    | 4    | 4    | RTS_R4+_901 |
| TSS-FWD-1472 | FWD | 3013125 | 3    | 3    | 4    | RTS_R4+_903 |
| TSS-FWD-1473 | FWD | 3023691 | 13   | 13   | 13   | RTS_R4+_905 |
| TSS-FWD-1474 | FWD | 3031063 | 19   | 20   | 27   | RTS_R4+_906 |
| TSS-FWD-1475 | FWD | 3031071 | 17   | 17   | 18   | RTS_R4+_906 |
| TSS-FWD-1476 | FWD | 3037844 | 99   | 99   | 99   | RTS_R4+_907 |
| TSS-FWD-1477 | FWD | 3039304 | 403  | 414  | 419  | RTS_R4+_908 |
| TSS-FWD-1478 | FWD | 3041661 | 79   | 79   | 79   | RTS_R4+_909 |
| TSS-FWD-1479 | FWD | 3041716 | 61   | 65   | 65   | RTS_R4+_909 |
| TSS-FWD-1480 | FWD | 3053511 | 80   | 80   | 80   | RTS_R4+_910 |
| TSS-FWD-1481 | FWD | 3053781 | 37   | 43   | 79   | RTS_R4+_911 |
| TSS-FWD-1482 | FWD | 3053790 | 73   | 73   | 76   | RTS_R4+_911 |
| TSS-FWD-1483 | FWD | 3053880 | 18   | 21   | 52   | RTS_R4+_911 |
| TSS-FWD-1484 | FWD | 3053996 | 196  | 332  | 444  | RTS_R4+_911 |
| TSS-FWD-1485 | FWD | 3054873 | 32   | 41   | 58   | RTS_R4+_912 |
| TSS-FWD-1486 | FWD | 3057743 | 6    | 6    | 6    | RTS_R4+_913 |
| TSS-FWD-1487 | FWD | 3057751 | 9    | 9    | 9    | RTS_R4+_913 |
| TSS-FWD-1488 | FWD | 3065229 | 48   | 49   | 49   | RTS_R4+_914 |
| TSS-FWD-1489 | FWD | 3079905 | 3    | 3    | 3    | RTS_R4+_915 |
| TSS-FWD-1490 | FWD | 3084589 | 153  | 256  | 328  | RTS_R4+_916 |
| TSS-FWD-1491 | FWD | 3084613 | 52   | 52   | 52   | RTS_R4+_916 |
| TSS-FWD-1492 | FWD | 3084691 | 123  | 123  | 123  | RTS_R4+_916 |
| TSS-FWD-1493 | FWD | 3084705 | 2486 | 2514 | 2540 | RTS_R4+_916 |
| TSS-FWD-1494 | FWD | 3084711 | 487  | 500  | 505  | RTS_R4+_916 |
| TSS-FWD-1495 | FWD | 3086277 | 148  | 149  | 149  | RTS_R4+_917 |
| TSS-FWD-1496 | FWD | 3089091 | 152  | 152  | 152  | RTS_R4+_918 |
| TSS-FWD-1497 | FWD | 3089097 | 184  | 188  | 188  | RTS_R4+_918 |
| TSS-FWD-1498 | FWD | 3090922 | 50   | 50   | 50   | RTS_R4+_919 |
| TSS-FWD-1499 | FWD | 3090929 | 84   | 84   | 84   | RTS_R4+_919 |
| TSS-FWD-1500 | FWD | 3093082 | 12   | 12   | 12   | RTS_R4+_920 |
| TSS-FWD-1501 | FWD | 3094639 | 30   | 30   | 30   | RTS_R4+_921 |
| TSS-FWD-1502 | FWD | 3094645 | 40   | 40   | 40   | RTS_R4+_921 |
| TSS-FWD-1503 | FWD | 3096582 | 5    | 5    | 5    | RTS_R4+_922 |
| TSS-FWD-1504 | FWD | 3101011 | 8    | 8    | 8    | RTS_R4+_924 |
| TSS-FWD-1505 | FWD | 3101024 | 7    | 7    | 7    | RTS_R4+_924 |
| TSS-FWD-1506 | FWD | 3102014 | 103  | 103  | 103  | RTS_R4+_925 |
| TSS-FWD-1507 | FWD | 3102064 | 268  | 268  | 268  | RTS_R4+_925 |



|              |     |         |      |      |      |             |
|--------------|-----|---------|------|------|------|-------------|
| TSS-FWD-1508 | FWD | 3103673 | 36   | 38   | 38   | RTS_R4+_926 |
| TSS-FWD-1509 | FWD | 3107546 | 2    | 2    | 7    | RTS_R4+_927 |
| TSS-FWD-1510 | FWD | 3108436 |      | 5    | 37   | RTS_R4+_928 |
| TSS-FWD-1511 | FWD | 3109328 | 12   | 12   | 12   | RTS_R4+_929 |
| TSS-FWD-1512 | FWD | 3119402 | 39   | 39   | 40   | RTS_R4+_930 |
| TSS-FWD-1513 | FWD | 3126227 | 25   | 25   | 28   | RTS_R4+_931 |
| TSS-FWD-1514 | FWD | 3128104 | 3    | 3    | 3    | RTS_R4+_932 |
| TSS-FWD-1515 | FWD | 3136722 | 72   | 72   | 74   | RTS_R4+_933 |
| TSS-FWD-1516 | FWD | 3145884 | 7    | 11   | 37   | RTS_R4+_934 |
| TSS-FWD-1517 | FWD | 3147658 | 55   | 62   | 70   | RTS_R4+_935 |
| TSS-FWD-1518 | FWD | 3150232 | 51   | 53   | 53   | RTS_R4+_936 |
| TSS-FWD-1519 | FWD | 3151551 | 40   | 40   | 41   | RTS_R4+_937 |
| TSS-FWD-1520 | FWD | 3153325 | 1652 | 1652 | 1653 | RTS_R4+_938 |
| TSS-FWD-1521 | FWD | 3153352 | 86   | 87   | 87   | RTS_R4+_938 |
| TSS-FWD-1522 | FWD | 3154594 | 135  | 135  | 171  | RTS_R4+_939 |
| TSS-FWD-1523 | FWD | 3167822 | 5    | 5    | 5    | RTS_R4+_940 |
| TSS-FWD-1524 | FWD | 3170526 | 178  | 178  | 178  | RTS_R4+_941 |
| TSS-FWD-1525 | FWD | 3171143 | 1263 | 1265 | 1268 | RTS_R4+_942 |
| TSS-FWD-1526 | FWD | 3175035 |      |      | 1    | RTS_R4+_943 |
| TSS-FWD-1527 | FWD | 3175888 | 82   | 82   | 86   | RTS_R4+_944 |
| TSS-FWD-1528 | FWD | 3176023 | 229  | 229  | 230  | RTS_R4+_944 |
| TSS-FWD-1529 | FWD | 3176097 | 213  | 214  | 215  | RTS_R4+_944 |
| TSS-FWD-1530 | FWD | 3177739 | 387  | 398  | 407  | RTS_R4+_945 |
| TSS-FWD-1531 | FWD | 3178779 | 19   | 19   | 19   | RTS_R4+_946 |
| TSS-FWD-1532 | FWD | 3178893 | 21   | 21   | 21   | RTS_R4+_946 |
| TSS-FWD-1533 | FWD | 3178902 | 19   | 19   | 19   | RTS_R4+_946 |
| TSS-FWD-1534 | FWD | 3180445 | 34   | 34   | 34   | RTS_R4+_947 |
| TSS-FWD-1535 | FWD | 3180472 | 15   | 15   | 21   | RTS_R4+_947 |
| TSS-FWD-1536 | FWD | 3182820 | 157  | 158  | 159  | RTS_R4+_948 |
| TSS-FWD-1537 | FWD | 3182835 | 520  | 520  | 520  | RTS_R4+_948 |
| TSS-FWD-1538 | FWD | 3184102 |      |      | 2    | RTS_R4+_949 |
| TSS-FWD-1539 | FWD | 3199068 | 21   | 21   | 21   | RTS_R4+_950 |
| TSS-FWD-1540 | FWD | 3199114 | 9    | 9    | 9    | RTS_R4+_950 |
| TSS-FWD-1541 | FWD | 3199202 | 18   | 18   | 18   | RTS_R4+_950 |
| TSS-FWD-1542 | FWD | 3199811 | 6    | 7    | 7    | RTS_R4+_951 |
| TSS-FWD-1543 | FWD | 3199885 | 8    | 8    | 9    | RTS_R4+_951 |
| TSS-FWD-1544 | FWD | 3199888 | 6    | 6    | 8    | RTS_R4+_951 |
| TSS-FWD-1545 | FWD | 3199920 |      | 3    | 7    | RTS_R4+_951 |
| TSS-FWD-1546 | FWD | 3202677 | 85   | 88   | 88   | RTS_R4+_952 |
| TSS-FWD-1547 | FWD | 3208669 | 821  | 821  | 821  | RTS_R4+_953 |
| TSS-FWD-1548 | FWD | 3208738 | 3734 | 3783 | 3784 | RTS_R4+_953 |
| TSS-FWD-1549 | FWD | 3208740 | 3409 | 3426 | 3426 | RTS_R4+_953 |
| TSS-FWD-1550 | FWD | 3208743 | 1963 | 1968 | 1970 | RTS_R4+_953 |
| TSS-FWD-1551 | FWD | 3208781 | 1149 | 1181 | 1183 | RTS_R4+_953 |
| TSS-FWD-1552 | FWD | 3210489 | 11   | 12   | 12   | RTS_R4+_954 |
| TSS-FWD-1553 | FWD | 3210710 | 171  | 214  | 227  | RTS_R4+_954 |
| TSS-FWD-1554 | FWD | 3210752 | 1007 | 1286 | 1303 | RTS_R4+_954 |
| TSS-FWD-1555 | FWD | 3210963 | 479  | 566  | 568  | RTS_R4+_954 |
| TSS-FWD-1556 | FWD | 3213668 |      | 1    | 16   | RTS_R4+_955 |
| TSS-FWD-1557 | FWD | 3214775 | 97   | 167  | 172  | RTS_R4+_956 |
| TSS-FWD-1558 | FWD | 3217481 | 2    | 2    | 14   | RTS_R4+_957 |
| TSS-FWD-1559 | FWD | 3219417 | 2    | 2    | 2    | RTS_R4+_958 |
| TSS-FWD-1560 | FWD | 3229646 | 2    | 4    | 37   | RTS_R4+_959 |
| TSS-FWD-1561 | FWD | 3233959 | 16   | 16   | 16   | RTS_R4+_960 |
| TSS-FWD-1562 | FWD | 3235304 | 127  | 127  | 129  | RTS_R4+_961 |
| TSS-FWD-1563 | FWD | 3236497 | 39   | 39   | 40   | RTS_R4+_962 |
| TSS-FWD-1564 | FWD | 3237885 | 124  | 129  | 133  | RTS_R4+_963 |
| TSS-FWD-1565 | FWD | 3243045 |      | 2    | 2    | RTS_R4+_964 |
| TSS-FWD-1566 | FWD | 3244646 |      | 4    | 8    | RTS_R4+_965 |
| TSS-FWD-1567 | FWD | 3244656 | 4    | 5    | 6    | RTS_R4+_965 |
| TSS-FWD-1568 | FWD | 3245573 | 16   | 20   | 20   | RTS_R4+_966 |
| TSS-FWD-1569 | FWD | 3245627 | 74   | 75   | 75   | RTS_R4+_966 |
| TSS-FWD-1570 | FWD | 3245652 | 49   | 49   | 49   | RTS_R4+_966 |

|              |     |         |      |      |      |              |
|--------------|-----|---------|------|------|------|--------------|
| TSS-FWD-1571 | FWD | 3245667 | 25   | 26   | 26   | RTS_R4+_966  |
| TSS-FWD-1572 | FWD | 3246991 | 84   | 84   | 86   | RTS_R4+_967  |
| TSS-FWD-1573 | FWD | 3248592 | 2    | 2    | 2    | RTS_R4+_968  |
| TSS-FWD-1574 | FWD | 3249186 | 9    | 9    | 9    | RTS_R4+_969  |
| TSS-FWD-1575 | FWD | 3250285 | 87   | 96   | 176  | RTS_R4+_970  |
| TSS-FWD-1576 | FWD | 3252319 | 19   | 19   | 19   | RTS_R4+_971  |
| TSS-FWD-1577 | FWD | 3253037 | 11   | 11   | 11   | RTS_R4+_972  |
| TSS-FWD-1578 | FWD | 3253039 | 9    | 9    | 9    | RTS_R4+_972  |
| TSS-FWD-1579 | FWD | 3267552 | 3    | 3    | 3    | RTS_R4+_973  |
| TSS-FWD-1580 | FWD | 3273229 | 1    | 5    | 5    | RTS_R4+_974  |
| TSS-FWD-1581 | FWD | 3273257 | 2    | 3    | 5    | RTS_R4+_974  |
| TSS-FWD-1582 | FWD | 3273271 | 1    | 3    | 3    | RTS_R4+_974  |
| TSS-FWD-1583 | FWD | 3274994 | 575  | 709  | 805  | RTS_R4+_975  |
| TSS-FWD-1584 | FWD | 3276888 | 3    | 3    | 3    |              |
| TSS-FWD-1585 | FWD | 3281839 | 9    | 9    | 9    |              |
| TSS-FWD-1586 | FWD | 3285425 | 11   | 11   | 11   |              |
| TSS-FWD-1587 | FWD | 3291391 | 94   | 95   | 95   | RTS_R4+_976  |
| TSS-FWD-1588 | FWD | 3293818 | 18   | 18   | 18   | RTS_R4+_977  |
| TSS-FWD-1589 | FWD | 3294399 | 84   | 84   | 84   | RTS_R4+_978  |
| TSS-FWD-1590 | FWD | 3296930 | 46   | 48   | 54   | RTS_R4+_979  |
| TSS-FWD-1591 | FWD | 3297963 | 12   | 12   | 14   | RTS_R4+_980  |
| TSS-FWD-1592 | FWD | 3299461 |      | 4    | 4    | RTS_R4+_981  |
| TSS-FWD-1593 | FWD | 3301434 | 175  | 175  | 176  | RTS_R4+_982  |
| TSS-FWD-1594 | FWD | 3301444 | 233  | 236  | 237  | RTS_R4+_982  |
| TSS-FWD-1595 | FWD | 3316582 | 568  | 587  | 587  | RTS_R4+_983  |
| TSS-FWD-1596 | FWD | 3316589 | 136  | 138  | 138  | RTS_R4+_983  |
| TSS-FWD-1597 | FWD | 3316601 | 272  | 305  | 305  | RTS_R4+_983  |
| TSS-FWD-1598 | FWD | 3316636 | 137  | 146  | 146  | RTS_R4+_983  |
| TSS-FWD-1599 | FWD | 3325781 | 69   | 69   | 69   | RTS_R4+_984  |
| TSS-FWD-1600 | FWD | 3326958 | 13   | 13   | 13   | RTS_R4+_985  |
| TSS-FWD-1601 | FWD | 3331658 | 596  | 596  | 596  | RTS_R4+_986  |
| TSS-FWD-1602 | FWD | 3331724 | 107  | 107  | 107  | RTS_R4+_986  |
| TSS-FWD-1603 | FWD | 3331736 | 197  | 197  | 197  | RTS_R4+_986  |
| TSS-FWD-1604 | FWD | 3338233 | 5    | 5    | 5    | RTS_R4+_987  |
| TSS-FWD-1605 | FWD | 3338256 | 5    | 5    | 7    | RTS_R4+_987  |
| TSS-FWD-1606 | FWD | 3340285 | 52   | 53   | 53   | RTS_R4+_988  |
| TSS-FWD-1607 | FWD | 3341327 | 33   | 33   | 33   | RTS_R4+_989  |
| TSS-FWD-1608 | FWD | 3341390 | 76   | 78   | 79   | RTS_R4+_989  |
| TSS-FWD-1609 | FWD | 3342713 | 18   | 19   | 20   | RTS_R4+_990  |
| TSS-FWD-1610 | FWD | 3344129 | 35   | 35   | 35   | RTS_R4+_991  |
| TSS-FWD-1611 | FWD | 3344137 | 31   | 32   | 32   | RTS_R4+_991  |
| TSS-FWD-1612 | FWD | 3346447 | 38   | 39   | 41   | RTS_R4+_992  |
| TSS-FWD-1613 | FWD | 3348610 | 84   | 84   | 91   | RTS_R4+_993  |
| TSS-FWD-1614 | FWD | 3352068 | 2    | 2    | 2    | RTS_R4+_995  |
| TSS-FWD-1615 | FWD | 3352533 | 1100 | 1124 | 1124 | RTS_R4+_996  |
| TSS-FWD-1616 | FWD | 3352544 | 699  | 700  | 700  | RTS_R4+_996  |
| TSS-FWD-1617 | FWD | 3352583 | 86   | 87   | 87   | RTS_R4+_996  |
| TSS-FWD-1618 | FWD | 3359153 | 637  | 637  | 637  | RTS_R4+_997  |
| TSS-FWD-1619 | FWD | 3359163 | 68   | 68   | 68   | RTS_R4+_997  |
| TSS-FWD-1620 | FWD | 3359175 | 104  | 104  | 104  | RTS_R4+_997  |
| TSS-FWD-1621 | FWD | 3360933 | 1    | 1    | 1    | RTS_R4+_998  |
| TSS-FWD-1622 | FWD | 3360973 | 1    | 1    | 1    | RTS_R4+_998  |
| TSS-FWD-1623 | FWD | 3364969 | 6    | 6    | 6    | RTS_R4+_999  |
| TSS-FWD-1624 | FWD | 3364973 | 5    | 5    | 5    | RTS_R4+_999  |
| TSS-FWD-1625 | FWD | 3378148 | 619  | 662  | 677  | RTS_R4+_1000 |
| TSS-FWD-1626 | FWD | 3378182 | 46   | 47   | 49   | RTS_R4+_1000 |
| TSS-FWD-1627 | FWD | 3378675 | 15   | 15   | 16   | RTS_R4+_1001 |
| TSS-FWD-1628 | FWD | 3378729 | 20   | 20   | 20   | RTS_R4+_1001 |
| TSS-FWD-1629 | FWD | 3380203 | 53   | 53   | 53   | RTS_R4+_1002 |
| TSS-FWD-1630 | FWD | 3382622 | 18   | 19   | 19   | RTS_R4+_1003 |
| TSS-FWD-1631 | FWD | 3382699 | 45   | 45   | 46   | RTS_R4+_1003 |
| TSS-FWD-1632 | FWD | 3383540 | 9    | 11   | 11   | RTS_R4+_1004 |
| TSS-FWD-1633 | FWD | 3386963 | 3    | 3    | 3    | RTS_R4+_1005 |

|              |     |         |      |      |      |              |
|--------------|-----|---------|------|------|------|--------------|
| TSS-FWD-1634 | FWD | 3387502 | 92   | 92   | 92   | RTS_R4+_1006 |
| TSS-FWD-1635 | FWD | 3390911 |      | 1    | 1    | RTS_R4+_1007 |
| TSS-FWD-1636 | FWD | 3392539 | 5    | 5    | 5    | RTS_R4+_1008 |
| TSS-FWD-1637 | FWD | 3395856 | 19   | 19   | 19   | RTS_R4+_1009 |
| TSS-FWD-1638 | FWD | 3400640 |      | 1    | 1    | RTS_R4+_1010 |
| TSS-FWD-1639 | FWD | 3401252 | 5    | 7    | 31   | RTS_R4+_1011 |
| TSS-FWD-1640 | FWD | 3401401 | 31   | 31   | 31   | RTS_R4+_1011 |
| TSS-FWD-1641 | FWD | 3401475 | 20   | 21   | 21   | RTS_R4+_1011 |
| TSS-FWD-1642 | FWD | 3402769 | 39   | 39   | 39   | RTS_R4+_1012 |
| TSS-FWD-1643 | FWD | 3402779 | 40   | 40   | 40   | RTS_R4+_1012 |
| TSS-FWD-1644 | FWD | 3403396 | 91   | 91   | 91   | RTS_R4+_1013 |
| TSS-FWD-1645 | FWD | 3403474 | 48   | 51   | 51   | RTS_R4+_1013 |
| TSS-FWD-1646 | FWD | 3405208 | 5    | 6    | 7    | RTS_R4+_1014 |
| TSS-FWD-1647 | FWD | 3405256 |      | 1    | 5    | RTS_R4+_1014 |
| TSS-FWD-1648 | FWD | 3407005 | 34   | 35   | 35   | RTS_R4+_1015 |
| TSS-FWD-1649 | FWD | 3407062 | 253  | 256  | 257  | RTS_R4+_1015 |
| TSS-FWD-1650 | FWD | 3408270 | 26   | 26   | 26   | RTS_R4+_1016 |
| TSS-FWD-1651 | FWD | 3410612 | 50   | 51   | 51   | RTS_R4+_1017 |
| TSS-FWD-1652 | FWD | 3411816 | 15   | 15   | 15   |              |
| TSS-FWD-1653 | FWD | 3416353 | 36   | 36   | 36   | RTS_R4+_1018 |
| TSS-FWD-1654 | FWD | 3417074 | 10   | 10   | 10   | RTS_R4+_1019 |
| TSS-FWD-1655 | FWD | 3427233 | 58   | 58   | 58   | RTS_R4+_1020 |
| TSS-FWD-1656 | FWD | 3431672 | 61   | 64   | 72   | RTS_R4+_1021 |
| TSS-FWD-1657 | FWD | 3431680 | 25   | 28   | 54   | RTS_R4+_1021 |
| TSS-FWD-1658 | FWD | 3435866 | 12   | 16   | 73   | RTS_R4+_1022 |
| TSS-FWD-1659 | FWD | 3436063 | 59   | 60   | 63   | RTS_R4+_1022 |
| TSS-FWD-1660 | FWD | 3453562 | 8    | 8    | 8    | RTS_R4+_1023 |
| TSS-FWD-1661 | FWD | 3453580 | 5    | 5    | 5    | RTS_R4+_1023 |
| TSS-FWD-1662 | FWD | 3475637 | 34   | 37   | 37   | RTS_R4+_1024 |
| TSS-FWD-1663 | FWD | 3476465 | 2    | 2    | 2    | RTS_R4+_1025 |
| TSS-FWD-1664 | FWD | 3479280 | 20   | 20   | 23   | RTS_R4+_1026 |
| TSS-FWD-1665 | FWD | 3482202 | 37   | 38   | 38   | RTS_R4+_1027 |
| TSS-FWD-1666 | FWD | 3483975 | 110  | 120  | 123  | RTS_R4+_1028 |
| TSS-FWD-1667 | FWD | 3483987 | 44   | 44   | 44   | RTS_R4+_1028 |
| TSS-FWD-1668 | FWD | 3483071 |      |      | 125  | RTS_R4+_1028 |
| TSS-FWD-1669 | FWD | 3484074 | 1160 | 1167 | 1170 | RTS_R4+_1028 |
| TSS-FWD-1670 | FWD | 3484120 | 63   | 63   | 64   | RTS_R4+_1028 |
| TSS-FWD-1671 | FWD | 3484132 | 129  | 129  | 130  | RTS_R4+_1028 |
| TSS-FWD-1672 | FWD | 3490542 | 17   | 17   | 17   | RTS_R4+_1029 |
| TSS-FWD-1673 | FWD | 3491922 | 14   | 14   | 14   | RTS_R4+_1030 |
| TSS-FWD-1674 | FWD | 3492009 | 19   | 34   | 34   | RTS_R4+_1030 |
| TSS-FWD-1675 | FWD | 3495774 | 74   | 74   | 74   | RTS_R4+_1031 |
| TSS-FWD-1676 | FWD | 3495828 | 18   | 20   | 20   | RTS_R4+_1031 |
| TSS-FWD-1677 | FWD | 3497436 | 6    | 6    | 6    | RTS_R4+_1032 |
| TSS-FWD-1678 | FWD | 3497478 | 10   | 10   | 10   | RTS_R4+_1032 |
| TSS-FWD-1679 | FWD | 3502047 | 28   | 28   | 29   | RTS_R4+_1033 |
| TSS-FWD-1680 | FWD | 3502055 | 26   | 27   | 27   | RTS_R4+_1033 |
| TSS-FWD-1681 | FWD | 3502099 | 22   | 22   | 23   | RTS_R4+_1033 |
| TSS-FWD-1682 | FWD | 3520848 | 18   | 19   | 19   | RTS_R4+_1035 |
| TSS-FWD-1683 | FWD | 3524344 | 35   | 35   | 35   | RTS_R4+_1036 |
| TSS-FWD-1684 | FWD | 3526662 | 16   | 16   | 16   | RTS_R4+_1037 |
| TSS-FWD-1685 | FWD | 3527132 | 3    | 73   | 73   | RTS_R4+_1038 |
| TSS-FWD-1686 | FWD | 3530701 | 20   | 20   | 20   | RTS_R4+_1039 |
| TSS-FWD-1687 | FWD | 3530813 | 77   | 83   | 89   | RTS_R4+_1039 |
| TSS-FWD-1688 | FWD | 3534487 |      | 2    | 10   | RTS_R4+_1040 |
| TSS-FWD-1689 | FWD | 3534659 | 11   | 11   | 11   | RTS_R4+_1040 |
| TSS-FWD-1690 | FWD | 3534688 | 9    | 9    | 9    | RTS_R4+_1040 |
| TSS-FWD-1691 | FWD | 3535375 | 242  | 243  | 243  | RTS_R4+_1041 |
| TSS-FWD-1692 | FWD | 3535376 | 269  | 269  | 269  | RTS_R4+_1041 |
| TSS-FWD-1693 | FWD | 3538080 | 23   | 23   | 24   | RTS_R4+_1042 |
| TSS-FWD-1694 | FWD | 3542880 | 3    | 3    | 3    |              |
| TSS-FWD-1695 | FWD | 3543480 | 32   | 36   | 36   | RTS_R4+_1044 |
| TSS-FWD-1696 | FWD | 3543618 | 481  | 481  | 481  | RTS_R4+_1044 |

|              |     |         |      |      |      |              |
|--------------|-----|---------|------|------|------|--------------|
| TSS-FWD-1697 | FWD | 3543630 | 82   | 82   | 82   | RTS_R4+_1044 |
| TSS-FWD-1698 | FWD | 3543655 | 90   | 96   | 96   | RTS_R4+_1044 |
| TSS-FWD-1699 | FWD | 3544427 |      | 2    | 2    | RTS_R4+_1045 |
| TSS-FWD-1700 | FWD | 3544499 | 6    | 13   | 13   | RTS_R4+_1045 |
| TSS-FWD-1701 | FWD | 3551046 | 504  | 508  | 511  | RTS_R4+_1046 |
| TSS-FWD-1702 | FWD | 3559931 | 11   | 12   | 13   | RTS_R4+_1048 |
| TSS-FWD-1703 | FWD | 3559948 | 11   | 11   | 11   | RTS_R4+_1048 |
| TSS-FWD-1704 | FWD | 3560002 | 10   | 10   | 10   | RTS_R4+_1048 |
| TSS-FWD-1705 | FWD | 3560011 | 12   | 12   | 12   | RTS_R4+_1048 |
| TSS-FWD-1706 | FWD | 3572952 | 16   | 16   | 16   | RTS_R4+_1049 |
| TSS-FWD-1707 | FWD | 3579134 | 6    | 6    | 6    | RTS_R4+_1050 |
| TSS-FWD-1708 | FWD | 3581412 | 3    | 3    | 3    | RTS_R4+_1051 |
| TSS-FWD-1709 | FWD | 3582633 | 34   | 34   | 34   | RTS_R4+_1052 |
| TSS-FWD-1710 | FWD | 3584943 | 126  | 144  | 213  | RTS_R4+_1053 |
| TSS-FWD-1711 | FWD | 3590459 | 27   | 27   | 34   | RTS_R4+_1054 |
| TSS-FWD-1712 | FWD | 3590461 | 31   | 32   | 33   | RTS_R4+_1054 |
| TSS-FWD-1713 | FWD | 3595981 | 73   | 73   | 73   | RTS_R4+_1055 |
| TSS-FWD-1714 | FWD | 3602350 | 25   | 25   | 25   | RTS_R4+_1056 |
| TSS-FWD-1715 | FWD | 3602360 | 25   | 25   | 27   | RTS_R4+_1056 |
| TSS-FWD-1716 | FWD | 3603759 | 38   | 38   | 38   | RTS_R4+_1057 |
| TSS-FWD-1717 | FWD | 3604445 | 25   | 33   | 34   | RTS_R4+_1058 |
| TSS-FWD-1718 | FWD | 3607131 | 7    | 7    | 7    | RTS_R4+_1059 |
| TSS-FWD-1719 | FWD | 3607248 | 11   | 11   | 11   | RTS_R4+_1059 |
| TSS-FWD-1720 | FWD | 3607940 | 91   | 97   | 101  | RTS_R4+_1060 |
| TSS-FWD-1721 | FWD | 3609865 | 11   | 11   | 11   | RTS_R4+_1061 |
| TSS-FWD-1722 | FWD | 3610784 | 11   | 11   | 11   | RTS_R4+_1062 |
| TSS-FWD-1723 | FWD | 3610789 | 9    | 9    | 9    | RTS_R4+_1062 |
| TSS-FWD-1724 | FWD | 3610844 | 8    | 8    | 8    | RTS_R4+_1062 |
| TSS-FWD-1725 | FWD | 3616560 | 57   | 57   | 57   | RTS_R4+_1063 |
| TSS-FWD-1726 | FWD | 3616569 | 39   | 39   | 39   | RTS_R4+_1063 |
| TSS-FWD-1727 | FWD | 3617209 | 3    | 3    | 3    | RTS_R4+_1064 |
| TSS-FWD-1728 | FWD | 3621754 | 4    | 4    | 4    | RTS_R4+_1065 |
| TSS-FWD-1729 | FWD | 3632765 | 40   | 40   | 40   | RTS_R4+_1066 |
| TSS-FWD-1730 | FWD | 3635635 | 30   | 30   | 30   | RTS_R4+_1067 |
| TSS-FWD-1731 | FWD | 3635677 | 29   | 29   | 29   | RTS_R4+_1067 |
| TSS-FWD-1732 | FWD | 3638007 | 323  | 326  | 326  | RTS_R4+_1068 |
| TSS-FWD-1733 | FWD | 3638021 | 199  | 229  | 232  | RTS_R4+_1068 |
| TSS-FWD-1734 | FWD | 3638114 | 243  | 258  | 264  | RTS_R4+_1068 |
| TSS-FWD-1735 | FWD | 3639000 | 8    | 8    | 8    | RTS_R4+_1069 |
| TSS-FWD-1736 | FWD | 3643355 | 135  | 135  | 135  | RTS_R4+_1070 |
| TSS-FWD-1737 | FWD | 3644298 | 58   | 58   | 58   | RTS_R4+_1071 |
| TSS-FWD-1738 | FWD | 3646086 | 15   | 15   | 15   | RTS_R4+_1072 |
| TSS-FWD-1739 | FWD | 3646533 | 2    | 2    | 2    | RTS_R4+_1073 |
| TSS-FWD-1740 | FWD | 3648138 | 5    | 5    | 5    | RTS_R4+_1074 |
| TSS-FWD-1741 | FWD | 3648198 | 6    | 6    | 6    | RTS_R4+_1074 |
| TSS-FWD-1742 | FWD | 3651959 | 1414 | 1415 | 1785 | RTS_R4+_1075 |
| TSS-FWD-1743 | FWD | 3654983 | 487  | 487  | 545  | RTS_R4+_1076 |
| TSS-FWD-1744 | FWD | 3654989 | 389  | 389  | 399  | RTS_R4+_1076 |
| TSS-FWD-1745 | FWD | 3655002 | 90   | 90   | 126  | RTS_R4+_1076 |
| TSS-FWD-1746 | FWD | 3655034 | 3    | 3    | 4    | RTS_R4+_1076 |
| TSS-FWD-1747 | FWD | 3655823 | 89   | 89   | 215  | RTS_R4+_1077 |
| TSS-FWD-1748 | FWD | 3656265 | 18   | 18   | 37   | RTS_R4+_1077 |
| TSS-FWD-1749 | FWD | 3656297 | 12   | 14   | 19   | RTS_R4+_1077 |
| TSS-FWD-1750 | FWD | 3656322 | 15   | 15   | 38   | RTS_R4+_1077 |
| TSS-FWD-1751 | FWD | 3656369 | 4    | 4    | 4    | RTS_R4+_1077 |
| TSS-FWD-1752 | FWD | 3656973 | 36   | 37   | 91   | RTS_R4+_1078 |
| TSS-FWD-1753 | FWD | 3657015 | 49   | 49   | 115  | RTS_R4+_1078 |
| TSS-FWD-1754 | FWD | 3657239 | 65   | 65   | 65   | RTS_R4+_1078 |
| TSS-FWD-1755 | FWD | 3662887 | 7    | 8    | 34   | RTS_R4+_1079 |
| TSS-FWD-1756 | FWD | 3664096 |      |      | 2    | RTS_R4+_1080 |
| TSS-FWD-1757 | FWD | 3667508 | 6    | 6    | 6    | RTS_R4+_1081 |
| TSS-FWD-1758 | FWD | 3667569 | 10   | 10   | 10   | RTS_R4+_1081 |
| TSS-FWD-1759 | FWD | 3667572 | 8    | 8    | 8    | RTS_R4+_1081 |

|              |     |         |      |      |      |              |
|--------------|-----|---------|------|------|------|--------------|
| TSS-FWD-1760 | FWD | 3668915 |      | 1    | 4    | RTS_R4+_1082 |
| TSS-FWD-1761 | FWD | 3670379 | 3    | 4    | 4    | RTS_R4+_1083 |
| TSS-FWD-1762 | FWD | 3671355 | 30   | 30   | 32   | RTS_R4+_1084 |
| TSS-FWD-1763 | FWD | 3672780 | 149  | 149  | 149  | RTS_R4+_1085 |
| TSS-FWD-1764 | FWD | 3672782 | 91   | 91   | 91   | RTS_R4+_1085 |
| TSS-FWD-1765 | FWD | 3677415 | 396  | 400  | 400  | RTS_R4+_1086 |
| TSS-FWD-1766 | FWD | 3694420 | 44   | 44   | 44   | RTS_R4+_1087 |
| TSS-FWD-1767 | FWD | 3694466 | 241  | 242  | 247  | RTS_R4+_1087 |
| TSS-FWD-1768 | FWD | 3698161 |      |      | 12   | RTS_R4+_1088 |
| TSS-FWD-1769 | FWD | 3698565 | 3    | 4    | 4    | RTS_R4+_1089 |
| TSS-FWD-1770 | FWD | 3699582 | 7    | 7    | 7    | RTS_R4+_1090 |
| TSS-FWD-1771 | FWD | 3705912 | 22   | 22   | 22   | RTS_R4+_1091 |
| TSS-FWD-1772 | FWD | 3710942 | 38   | 40   | 40   | RTS_R4+_1092 |
| TSS-FWD-1773 | FWD | 3714525 | 37   | 37   | 38   | RTS_R4+_1093 |
| TSS-FWD-1774 | FWD | 3715310 | 592  | 592  | 593  | RTS_R4+_1094 |
| TSS-FWD-1775 | FWD | 3717454 | 187  | 191  | 198  | RTS_R4+_1095 |
| TSS-FWD-1776 | FWD | 3717461 | 45   | 45   | 45   | RTS_R4+_1095 |
| TSS-FWD-1777 | FWD | 3717466 | 107  | 108  | 108  | RTS_R4+_1095 |
| TSS-FWD-1778 | FWD | 3717912 | 82   | 91   | 91   | RTS_R4+_1096 |
| TSS-FWD-1779 | FWD | 3718038 | 81   | 81   | 81   | RTS_R4+_1096 |
| TSS-FWD-1780 | FWD | 3718397 | 10   | 11   | 12   |              |
| TSS-FWD-1781 | FWD | 3723922 | 11   | 11   | 11   | RTS_R4+_1098 |
| TSS-FWD-1782 | FWD | 3729092 |      |      | 1    | RTS_R4+_1099 |
| TSS-FWD-1783 | FWD | 3732937 | 12   | 12   | 12   | RTS_R4+_1099 |
| TSS-FWD-1784 | FWD | 3735030 | 20   | 21   | 23   | RTS_R4+_1100 |
| TSS-FWD-1785 | FWD | 3735218 | 14   | 14   | 14   | RTS_R4+_1100 |
| TSS-FWD-1786 | FWD | 3737697 | 57   | 57   | 57   | RTS_R4+_1101 |
| TSS-FWD-1787 | FWD | 3740696 | 1    | 1    | 1    |              |
| TSS-FWD-1788 | FWD | 3749991 | 12   | 12   | 19   | RTS_R4+_1102 |
| TSS-FWD-1789 | FWD | 3760215 | 1    | 1    | 1    | RTS_R4+_1103 |
| TSS-FWD-1790 | FWD | 3764190 | 5    | 5    | 5    | RTS_R4+_1104 |
| TSS-FWD-1791 | FWD | 3764321 | 6    | 6    | 6    | RTS_R4+_1104 |
| TSS-FWD-1792 | FWD | 3764326 | 8    | 8    | 8    | RTS_R4+_1104 |
| TSS-FWD-1793 | FWD | 3764936 | 33   | 37   | 39   | RTS_R4+_1105 |
| TSS-FWD-1794 | FWD | 3767397 | 2    | 2    | 2    |              |
| TSS-FWD-1795 | FWD | 3770149 | 16   | 18   | 21   | RTS_R4+_1107 |
| TSS-FWD-1796 | FWD | 3770212 | 191  | 191  | 210  | RTS_R4+_1107 |
| TSS-FWD-1797 | FWD | 3772407 | 173  | 178  | 193  | RTS_R4+_1108 |
| TSS-FWD-1798 | FWD | 3772421 | 41   | 41   | 41   | RTS_R4+_1108 |
| TSS-FWD-1799 | FWD | 3772428 | 189  | 197  | 207  | RTS_R4+_1108 |
| TSS-FWD-1800 | FWD | 3772439 | 47   | 48   | 55   | RTS_R4+_1108 |
| TSS-FWD-1801 | FWD | 3774659 | 69   | 69   | 69   | RTS_R4+_1109 |
| TSS-FWD-1802 | FWD | 3775315 | 19   | 19   | 19   | RTS_R4+_1110 |
| TSS-FWD-1803 | FWD | 3779202 | 2    | 2    | 2    | RTS_R4+_1111 |
| TSS-FWD-1804 | FWD | 3783229 | 86   | 93   | 94   | RTS_R4+_1112 |
| TSS-FWD-1805 | FWD | 3783250 | 806  | 806  | 806  | RTS_R4+_1112 |
| TSS-FWD-1806 | FWD | 3783255 | 368  | 372  | 372  | RTS_R4+_1112 |
| TSS-FWD-1807 | FWD | 3783260 | 176  | 203  | 203  | RTS_R4+_1112 |
| TSS-FWD-1808 | FWD | 3784837 | 116  | 116  | 118  | RTS_R4+_1113 |
| TSS-FWD-1809 | FWD | 3784987 | 107  | 108  | 108  | RTS_R4+_1113 |
| TSS-FWD-1810 | FWD | 3785034 | 92   | 92   | 92   | RTS_R4+_1113 |
| TSS-FWD-1811 | FWD | 3786063 | 22   | 22   | 22   | RTS_R4+_1114 |
| TSS-FWD-1812 | FWD | 3791776 | 53   | 53   | 53   | RTS_R4+_1115 |
| TSS-FWD-1813 | FWD | 3791833 | 35   | 35   | 35   | RTS_R4+_1115 |
| TSS-FWD-1814 | FWD | 3791962 | 2253 | 2296 | 2311 | RTS_R4+_1115 |
| TSS-FWD-1815 | FWD | 3791993 | 27   | 27   | 27   | RTS_R4+_1115 |
| TSS-FWD-1816 | FWD | 3794947 | 30   | 30   | 30   | RTS_R4+_1116 |
| TSS-FWD-1817 | FWD | 3795078 | 47   | 47   | 47   | RTS_R4+_1116 |
| TSS-FWD-1818 | FWD | 3806539 | 38   | 38   | 38   | RTS_R4+_1117 |
| TSS-FWD-1819 | FWD | 3807344 | 54   | 54   | 54   | RTS_R4+_1118 |
| TSS-FWD-1820 | FWD | 3810724 | 9    | 9    | 9    | RTS_R4+_1119 |
| TSS-FWD-1821 | FWD | 3811780 | 258  | 258  | 258  | RTS_R4+_1120 |
| TSS-FWD-1822 | FWD | 3811866 | 62   | 62   | 62   | RTS_R4+_1120 |

|              |     |         |      |      |      |              |
|--------------|-----|---------|------|------|------|--------------|
| TSS-FWD-1823 | FWD | 3814671 | 65   | 65   | 67   | RTS_R4+_1121 |
| TSS-FWD-1824 | FWD | 3814680 | 74   | 74   | 74   | RTS_R4+_1121 |
| TSS-FWD-1825 | FWD | 3815738 | 14   | 14   | 14   |              |
| TSS-FWD-1826 | FWD | 3819411 | 1232 | 1232 | 1233 | RTS_R4+_1122 |
| TSS-FWD-1827 | FWD | 3819419 | 962  | 963  | 963  | RTS_R4+_1122 |
| TSS-FWD-1828 | FWD | 3819424 | 196  | 196  | 197  | RTS_R4+_1122 |
| TSS-FWD-1829 | FWD | 3819942 | 147  | 150  | 151  | RTS_R4+_1123 |
| TSS-FWD-1830 | FWD | 3819946 | 96   | 97   | 100  | RTS_R4+_1123 |
| TSS-FWD-1831 | FWD | 3820008 | 166  | 170  | 170  | RTS_R4+_1123 |
| TSS-FWD-1832 | FWD | 3820101 | 129  | 131  | 133  | RTS_R4+_1123 |
| TSS-FWD-1833 | FWD | 3820103 | 118  | 120  | 122  | RTS_R4+_1123 |
| TSS-FWD-1834 | FWD | 3826943 | 264  | 264  | 264  | RTS_R4+_1124 |
| TSS-FWD-1835 | FWD | 3826958 | 121  | 121  | 121  | RTS_R4+_1124 |
| TSS-FWD-1836 | FWD | 3828454 | 39   | 40   | 43   | RTS_R4+_1125 |
| TSS-FWD-1837 | FWD | 3834176 | 4    | 11   | 14   | RTS_R4+_1126 |
| TSS-FWD-1838 | FWD | 3836236 | 28   | 28   | 28   | RTS_R4+_1127 |
| TSS-FWD-1839 | FWD | 3838038 | 9    | 9    | 9    | RTS_R4+_1128 |
| TSS-FWD-1840 | FWD | 3841958 | 11   | 11   | 11   | RTS_R4+_1129 |
| TSS-FWD-1841 | FWD | 3841961 | 11   | 11   | 12   | RTS_R4+_1129 |
| TSS-FWD-1842 | FWD | 3842137 | 15   | 15   | 15   | RTS_R4+_1129 |
| TSS-FWD-1843 | FWD | 3842154 | 12   | 12   | 12   | RTS_R4+_1129 |
| TSS-FWD-1844 | FWD | 3851354 | 15   | 15   | 15   | RTS_R4+_1130 |
| TSS-FWD-1845 | FWD | 3854453 | 7    | 7    | 7    | RTS_R4+_1132 |
| TSS-FWD-1846 | FWD | 3858282 | 1    | 1    | 1    |              |
| TSS-FWD-1847 | FWD | 3861646 | 11   | 11   | 11   |              |
| TSS-FWD-1848 | FWD | 3865466 |      | 7    | 7    | RTS_R4+_1134 |
| TSS-FWD-1849 | FWD | 3865740 | 11   | 11   | 11   | RTS_R4+_1134 |
| TSS-FWD-1850 | FWD | 3865744 | 10   | 10   | 10   | RTS_R4+_1134 |
| TSS-FWD-1851 | FWD | 3865754 | 7    | 7    | 7    | RTS_R4+_1134 |
| TSS-FWD-1852 | FWD | 3867376 | 1    | 1    | 1    |              |
| TSS-FWD-1853 | FWD | 3873331 |      |      | 3    | RTS_R4+_1135 |
| TSS-FWD-1854 | FWD | 3873461 | 4    | 4    | 4    | RTS_R4+_1135 |
| TSS-FWD-1855 | FWD | 3882073 | 42   | 44   | 48   | RTS_R4+_1136 |
| TSS-FWD-1856 | FWD | 3882139 | 21   | 22   | 22   | RTS_R4+_1136 |
| TSS-FWD-1857 | FWD | 3882227 | 231  | 233  | 234  | RTS_R4+_1136 |
| TSS-FWD-1858 | FWD | 3882262 | 1211 | 1227 | 1227 | RTS_R4+_1136 |
| TSS-FWD-1859 | FWD | 3882331 | 250  | 250  | 250  | RTS_R4+_1136 |
| TSS-FWD-1860 | FWD | 3883077 | 54   | 54   | 54   | RTS_R4+_1137 |
| TSS-FWD-1861 | FWD | 3884796 | 32   | 33   | 33   | RTS_R4+_1138 |
| TSS-FWD-1862 | FWD | 3886434 | 5    | 5    | 5    | RTS_R4+_1139 |
| TSS-FWD-1863 | FWD | 3886568 | 17   | 17   | 17   |              |
| TSS-FWD-1864 | FWD | 3890742 | 8    | 9    | 9    | RTS_R4+_1140 |
| TSS-FWD-1865 | FWD | 3891852 | 28   | 28   | 28   | RTS_R4+_1141 |
| TSS-FWD-1866 | FWD | 3891875 | 187  | 187  | 188  | RTS_R4+_1141 |
| TSS-FWD-1867 | FWD | 3894574 | 8    | 8    | 8    | RTS_R4+_1142 |
| TSS-FWD-1868 | FWD | 3894698 | 5    | 5    | 5    | RTS_R4+_1142 |
| TSS-FWD-1869 | FWD | 3895504 | 5    | 5    | 5    | RTS_R4+_1143 |
| TSS-FWD-1870 | FWD | 3895618 | 3    | 3    | 3    | RTS_R4+_1143 |
| TSS-FWD-1871 | FWD | 3902442 | 2    | 14   | 14   | RTS_R4+_1144 |
| TSS-FWD-1872 | FWD | 3920627 | 19   | 19   | 19   | RTS_R4+_1145 |
| TSS-FWD-1873 | FWD | 3925155 | 210  | 220  | 221  | RTS_R4+_1146 |
| TSS-FWD-1874 | FWD | 3929239 | 20   | 20   | 20   | RTS_R4+_1147 |
| TSS-FWD-1875 | FWD | 3931345 | 208  | 216  | 223  | RTS_R4+_1148 |
| TSS-FWD-1876 | FWD | 3935178 | 67   | 68   | 71   | RTS_R4+_1149 |
| TSS-FWD-1877 | FWD | 3935192 | 44   | 46   | 68   | RTS_R4+_1149 |
| TSS-FWD-1878 | FWD | 3936225 | 13   | 13   | 13   | RTS_R4+_1150 |
| TSS-FWD-1879 | FWD | 3939656 | 12   | 13   | 14   | RTS_R4+_1151 |
| TSS-FWD-1880 | FWD | 3939830 | 55   | 55   | 55   | RTS_R4+_1151 |
| TSS-FWD-1881 | FWD | 3946073 | 7656 | 7756 | 7782 | RTS_R4+_1154 |
| TSS-FWD-1882 | FWD | 3946081 | 1017 | 1063 | 1081 | RTS_R4+_1154 |
| TSS-FWD-1883 | FWD | 3946093 | 469  | 485  | 488  | RTS_R4+_1154 |
| TSS-FWD-1884 | FWD | 3946474 | 3    | 3    | 3    | RTS_R4+_1155 |
| TSS-FWD-1885 | FWD | 3948313 | 943  | 982  | 1007 | RTS_R4+_1156 |

|              |     |         |       |       |       |              |
|--------------|-----|---------|-------|-------|-------|--------------|
| TSS-FWD-1886 | FWD | 3948461 | 685   | 687   | 687   | RTS_R4+_1156 |
| TSS-FWD-1887 | FWD | 3955939 | 7251  | 7252  | 7252  | RTS_R4+_1157 |
| TSS-FWD-1888 | FWD | 3955960 | 6654  | 6654  | 6654  | RTS_R4+_1157 |
| TSS-FWD-1889 | FWD | 3955969 | 21    | 21    | 21    | RTS_R4+_1157 |
| TSS-FWD-1890 | FWD | 3955977 | 64    | 64    | 64    | RTS_R4+_1157 |
| TSS-FWD-1891 | FWD | 3955987 | 55    | 55    | 55    | RTS_R4+_1157 |
| TSS-FWD-1892 | FWD | 3958673 | 12    | 12    | 12    | RTS_R4+_1158 |
| TSS-FWD-1893 | FWD | 3963396 | 4     | 4     | 15    | RTS_R4+_1159 |
| TSS-FWD-1894 | FWD | 3963673 | 809   | 809   | 810   | RTS_R4+_1160 |
| TSS-FWD-1895 | FWD | 3963683 | 355   | 356   | 359   | RTS_R4+_1160 |
| TSS-FWD-1896 | FWD | 3963702 | 88    | 88    | 88    | RTS_R4+_1160 |
| TSS-FWD-1897 | FWD | 3963714 | 1597  | 1597  | 1597  | RTS_R4+_1160 |
| TSS-FWD-1898 | FWD | 3963763 | 1763  | 1763  | 1765  | RTS_R4+_1160 |
| TSS-FWD-1899 | FWD | 3964185 | 94    | 101   | 102   | RTS_R4+_1161 |
| TSS-FWD-1900 | FWD | 3964218 | 248   | 249   | 249   | RTS_R4+_1161 |
| TSS-FWD-1901 | FWD | 3964227 | 82    | 82    | 82    | RTS_R4+_1161 |
| TSS-FWD-1902 | FWD | 3964270 | 620   | 620   | 620   | RTS_R4+_1161 |
| TSS-FWD-1903 | FWD | 3965913 | 250   | 250   | 250   | RTS_R4+_1162 |
| TSS-FWD-1904 | FWD | 3965919 | 155   | 156   | 158   | RTS_R4+_1162 |
| TSS-FWD-1905 | FWD | 3966885 | 28    | 28    | 28    | RTS_R4+_1163 |
| TSS-FWD-1906 | FWD | 3966887 | 30    | 30    | 30    | RTS_R4+_1163 |
| TSS-FWD-1907 | FWD | 3967150 | 45    | 45    | 45    | RTS_R4+_1163 |
| TSS-FWD-1908 | FWD | 3967199 | 126   | 133   | 134   | RTS_R4+_1163 |
| TSS-FWD-1909 | FWD | 3968173 | 62    | 63    | 63    | RTS_R4+_1164 |
| TSS-FWD-1910 | FWD | 3968253 | 76    | 77    | 77    | RTS_R4+_1164 |
| TSS-FWD-1911 | FWD | 3978846 | 36    | 37    | 37    | RTS_R4+_1165 |
| TSS-FWD-1912 | FWD | 3980385 | 64    | 64    | 64    | RTS_R4+_1166 |
| TSS-FWD-1913 | FWD | 3980398 | 110   | 115   | 127   | RTS_R4+_1166 |
| TSS-FWD-1914 | FWD | 3980943 | 12    | 12    | 12    |              |
| TSS-FWD-1915 | FWD | 3984454 | 791   | 792   | 795   | RTS_R4+_1167 |
| TSS-FWD-1916 | FWD | 3988860 | 10    | 10    | 10    | RTS_R4+_1168 |
| TSS-FWD-1917 | FWD | 3988889 | 6     | 6     | 6     | RTS_R4+_1168 |
| TSS-FWD-1918 | FWD | 3988975 | 48    | 48    | 52    | RTS_R4+_1169 |
| TSS-FWD-1919 | FWD | 3989022 | 85    | 88    | 88    | RTS_R4+_1169 |
| TSS-FWD-1920 | FWD | 3989081 | 224   | 224   | 224   | RTS_R4+_1169 |
| TSS-FWD-1921 | FWD | 3989090 | 58    | 58    | 58    | RTS_R4+_1169 |
| TSS-FWD-1922 | FWD | 3992514 | 1236  | 1236  | 1238  | RTS_R4+_1170 |
| TSS-FWD-1923 | FWD | 3992528 | 63    | 63    | 63    | RTS_R4+_1170 |
| TSS-FWD-1924 | FWD | 3995930 | 44    | 46    | 46    | RTS_R4+_1171 |
| TSS-FWD-1925 | FWD | 3999215 | 121   | 122   | 123   | RTS_R4+_1172 |
| TSS-FWD-1926 | FWD | 3999221 | 105   | 107   | 107   | RTS_R4+_1172 |
| TSS-FWD-1927 | FWD | 3999296 | 100   | 103   | 103   | RTS_R4+_1172 |
| TSS-FWD-1928 | FWD | 3999326 | 125   | 141   | 141   | RTS_R4+_1172 |
| TSS-FWD-1929 | FWD | 4002838 | 16    | 16    | 16    | RTS_R4+_1173 |
| TSS-FWD-1930 | FWD | 4002852 | 12    | 12    | 12    | RTS_R4+_1173 |
| TSS-FWD-1931 | FWD | 4003859 | 89    | 89    | 89    | RTS_R4+_1174 |
| TSS-FWD-1932 | FWD | 4003866 | 52    | 54    | 54    | RTS_R4+_1174 |
| TSS-FWD-1933 | FWD | 4007163 | 8     | 8     | 8     | RTS_R4+_1175 |
| TSS-FWD-1934 | FWD | 4008982 | 7     | 7     | 7     | RTS_R4+_1176 |
| TSS-FWD-1935 | FWD | 4010909 | 4102  | 4103  | 4103  | RTS_R4+_1177 |
| TSS-FWD-1936 | FWD | 4010915 | 530   | 530   | 530   | RTS_R4+_1177 |
| TSS-FWD-1937 | FWD | 4010921 | 130   | 130   | 130   | RTS_R4+_1177 |
| TSS-FWD-1938 | FWD | 4010925 | 1868  | 1868  | 1868  | RTS_R4+_1177 |
| TSS-FWD-1939 | FWD | 4010930 | 331   | 331   | 331   | RTS_R4+_1177 |
| TSS-FWD-1940 | FWD | 4010939 | 1041  | 1041  | 1041  | RTS_R4+_1177 |
| TSS-FWD-1941 | FWD | 4010946 | 41057 | 41079 | 41079 | RTS_R4+_1177 |
| TSS-FWD-1942 | FWD | 4010954 | 258   | 259   | 259   | RTS_R4+_1177 |
| TSS-FWD-1943 | FWD | 4011033 | 5378  | 5387  | 5387  | RTS_R4+_1177 |
| TSS-FWD-1944 | FWD | 4011040 | 1438  | 1440  | 1440  | RTS_R4+_1177 |
| TSS-FWD-1945 | FWD | 4011050 | 3008  | 3013  | 3013  | RTS_R4+_1177 |
| TSS-FWD-1946 | FWD | 4011057 | 417   | 424   | 424   | RTS_R4+_1177 |
| TSS-FWD-1947 | FWD | 4014410 | 47    | 53    | 53    | RTS_R4+_1178 |
| TSS-FWD-1948 | FWD | 4014418 | 251   | 260   | 261   | RTS_R4+_1178 |

|              |     |         |       |       |       |              |
|--------------|-----|---------|-------|-------|-------|--------------|
| TSS-FWD-1949 | FWD | 4014427 | 35    | 36    | 36    | RTS_R4+_1178 |
| TSS-FWD-1950 | FWD | 4016743 | 18    | 18    | 18    | RTS_R4+_1179 |
| TSS-FWD-1951 | FWD | 4019890 | 120   | 122   | 122   | RTS_R4+_1180 |
| TSS-FWD-1952 | FWD | 4019932 | 62    | 62    | 62    | RTS_R4+_1180 |
| TSS-FWD-1953 | FWD | 4019999 | 38    | 38    | 38    | RTS_R4+_1180 |
| TSS-FWD-1954 | FWD | 4022835 | 278   | 283   | 286   | RTS_R4+_1181 |
| TSS-FWD-1955 | FWD | 4022995 | 366   | 369   | 371   | RTS_R4+_1181 |
| TSS-FWD-1956 | FWD | 4029153 | 701   | 703   | 705   | RTS_R4+_1182 |
| TSS-FWD-1957 | FWD | 4029161 | 42    | 42    | 43    | RTS_R4+_1182 |
| TSS-FWD-1958 | FWD | 4031257 | 12    | 13    | 13    | RTS_R4+_1183 |
| TSS-FWD-1959 | FWD | 4031295 | 18    | 18    | 18    | RTS_R4+_1183 |
| TSS-FWD-1960 | FWD | 4033095 | 20    | 20    | 20    | RTS_R4+_1184 |
| TSS-FWD-1961 | FWD | 4040070 | 140   | 143   | 143   | RTS_R4+_1185 |
| TSS-FWD-1962 | FWD | 4040414 | 107   | 107   | 107   | RTS_R4+_1186 |
| TSS-FWD-1963 | FWD | 4041400 | 201   | 201   | 201   | RTS_R4+_1187 |
| TSS-FWD-1964 | FWD | 4041406 | 65    | 66    | 66    | RTS_R4+_1187 |
| TSS-FWD-1965 | FWD | 4044962 | 781   | 786   | 786   | RTS_R4+_1188 |
| TSS-FWD-1966 | FWD | 4047922 | 152   | 238   | 245   | RTS_R4+_1189 |
| TSS-FWD-1967 | FWD | 4049059 | 2777  | 2974  | 4204  | RTS_R4+_1190 |
| TSS-FWD-1968 | FWD | 4049330 | 245   | 245   | 245   | RTS_R4+_1191 |
| TSS-FWD-1969 | FWD | 4056196 | 154   | 154   | 154   | RTS_R4+_1192 |
| TSS-FWD-1970 | FWD | 4056241 | 478   | 483   | 483   | RTS_R4+_1192 |
| TSS-FWD-1971 | FWD | 4056270 | 20    | 21    | 21    | RTS_R4+_1192 |
| TSS-FWD-1972 | FWD | 4056298 | 62    | 63    | 63    | RTS_R4+_1192 |
| TSS-FWD-1973 | FWD | 4056405 | 493   | 493   | 493   | RTS_R4+_1192 |
| TSS-FWD-1974 | FWD | 4058442 | 11    | 11    | 11    |              |
| TSS-FWD-1975 | FWD | 4059011 | 25    | 25    | 25    |              |
| TSS-FWD-1976 | FWD | 4071765 |       |       | 2     | RTS_R4+_1193 |
| TSS-FWD-1977 | FWD | 4073552 | 24    | 25    | 26    | RTS_R4+_1194 |
| TSS-FWD-1978 | FWD | 4077718 | 24    | 24    | 24    |              |
| TSS-FWD-1979 | FWD | 4083961 | 56    | 56    | 56    | RTS_R4+_1195 |
| TSS-FWD-1980 | FWD | 4095703 |       |       | 3     |              |
| TSS-FWD-1981 | FWD | 4095774 | 2     | 2     | 2     |              |
| TSS-FWD-1982 | FWD | 4098782 | 10947 | 10947 | 10966 | RTS_R4+_1196 |
| TSS-FWD-1983 | FWD | 4098787 | 2051  | 2051  | 2053  | RTS_R4+_1196 |
| TSS-FWD-1984 | FWD | 4098818 | 186   | 186   | 186   | RTS_R4+_1196 |
| TSS-FWD-1985 | FWD | 4098831 | 245   | 245   | 246   | RTS_R4+_1196 |
| TSS-FWD-1986 | FWD | 4100809 | 15    | 17    | 20    | RTS_R4+_1197 |
| TSS-FWD-1987 | FWD | 4100821 | 15    | 16    | 16    | RTS_R4+_1197 |
| TSS-FWD-1988 | FWD | 4100823 | 12    | 12    | 12    | RTS_R4+_1197 |
| TSS-FWD-1989 | FWD | 4103808 | 14    | 62    | 74    | RTS_R4+_1198 |
| TSS-FWD-1990 | FWD | 4104313 | 450   | 2450  | 2603  | RTS_R4+_1199 |
| TSS-FWD-1991 | FWD | 4104353 | 3360  | 3535  | 3576  | RTS_R4+_1199 |
| TSS-FWD-1992 | FWD | 4104472 | 50    | 50    | 50    | RTS_R4+_1199 |
| TSS-FWD-1993 | FWD | 4105495 | 72    | 74    | 75    | RTS_R4+_1200 |
| TSS-FWD-1994 | FWD | 4105542 | 395   | 419   | 421   | RTS_R4+_1200 |
| TSS-FWD-1995 | FWD | 4105548 | 721   | 884   | 887   | RTS_R4+_1200 |
| TSS-FWD-1996 | FWD | 4105554 | 87    | 108   | 108   | RTS_R4+_1200 |
| TSS-FWD-1997 | FWD | 4105562 | 141   | 245   | 245   | RTS_R4+_1200 |
| TSS-FWD-1998 | FWD | 4106828 | 62    | 63    | 63    | RTS_R4+_1201 |
| TSS-FWD-1999 | FWD | 4110278 | 1     | 3     | 4     | RTS_R4+_1203 |
| TSS-FWD-2000 | FWD | 4110750 | 118   | 118   | 121   | RTS_R4+_1204 |
| TSS-FWD-2001 | FWD | 4110954 | 44    | 47    | 52    | RTS_R4+_1204 |
| TSS-FWD-2002 | FWD | 4116450 | 17509 | 17573 | 17581 | RTS_R4+_1205 |
| TSS-FWD-2003 | FWD | 4116458 | 882   | 885   | 885   | RTS_R4+_1205 |
| TSS-FWD-2004 | FWD | 4116467 | 9665  | 9745  | 9749  | RTS_R4+_1205 |
| TSS-FWD-2005 | FWD | 4116471 | 302   | 302   | 302   | RTS_R4+_1205 |
| TSS-FWD-2006 | FWD | 4116502 | 2839  | 2965  | 2969  | RTS_R4+_1205 |
| TSS-FWD-2007 | FWD | 4116519 | 103   | 105   | 105   | RTS_R4+_1205 |
| TSS-FWD-2008 | FWD | 4116526 | 908   | 914   | 915   | RTS_R4+_1205 |
| TSS-FWD-2009 | FWD | 4120392 | 3     | 3     | 3     | RTS_R4+_1206 |
| TSS-FWD-2010 | FWD | 4124936 | 223   | 224   | 224   | RTS_R4+_1207 |
| TSS-FWD-2011 | FWD | 4124969 | 12    | 50    | 51    | RTS_R4+_1207 |



|              |     |         |       |       |       |              |
|--------------|-----|---------|-------|-------|-------|--------------|
| TSS-FWD-2012 | FWD | 4124975 | 2     | 6     | 60    | RTS_R4+_1207 |
| TSS-FWD-2013 | FWD | 4126658 | 101   | 108   | 108   | RTS_R4+_1208 |
| TSS-FWD-2014 | FWD | 4130573 | 76    | 82    | 83    | RTS_R4+_1209 |
| TSS-FWD-2015 | FWD | 4130610 | 124   | 137   | 137   | RTS_R4+_1209 |
| TSS-FWD-2016 | FWD | 4131813 | 276   | 489   | 492   | RTS_R4+_1210 |
| TSS-FWD-2017 | FWD | 4131817 | 3     | 22    | 40    | RTS_R4+_1210 |
| TSS-FWD-2018 | FWD | 4131823 | 9     | 34    | 52    | RTS_R4+_1210 |
| TSS-FWD-2019 | FWD | 4131834 | 184   | 195   | 196   | RTS_R4+_1210 |
| TSS-FWD-2020 | FWD | 4148383 | 7     | 7     | 7     | RTS_R4+_1211 |
| TSS-FWD-2021 | FWD | 4151359 | 3     | 3     | 3     | RTS_R4+_1212 |
| TSS-FWD-2022 | FWD | 4152908 | 80    | 80    | 80    | RTS_R4+_1213 |
| TSS-FWD-2023 | FWD | 4153001 | 82    | 84    | 84    | RTS_R4+_1213 |
| TSS-FWD-2024 | FWD | 4156479 | 6     | 6     | 6     | RTS_R4+_1214 |
| TSS-FWD-2025 | FWD | 4156517 | 8     | 8     | 8     | RTS_R4+_1214 |
| TSS-FWD-2026 | FWD | 4159102 | 57    | 59    | 59    | RTS_R4+_1215 |
| TSS-FWD-2027 | FWD | 4159117 | 90    | 94    | 94    | RTS_R4+_1215 |
| TSS-FWD-2028 | FWD | 4161428 |       | 1     | 1     | RTS_R4+_1216 |
| TSS-FWD-2029 | FWD | 4163423 | 9     | 9     | 12    | RTS_R4+_1217 |
| TSS-FWD-2030 | FWD | 4164242 | 5     | 5     | 5     | RTS_R4+_1218 |
| TSS-FWD-2031 | FWD | 4170057 | 63    | 64    | 64    | RTS_R4+_1219 |
| TSS-FWD-2032 | FWD | 4173311 | 48    | 49    | 49    | RTS_R4+_1220 |
| TSS-FWD-2033 | FWD | 4173411 | 918   | 3788  | 8769  | RTS_R4+_1220 |
| TSS-FWD-2034 | FWD | 4175236 | 785   | 795   | 795   | RTS_R4+_1221 |
| TSS-FWD-2035 | FWD | 4175269 | 1521  | 1532  | 1532  | RTS_R4+_1221 |
| TSS-FWD-2036 | FWD | 4175319 | 173   | 202   | 208   | RTS_R4+_1221 |
| TSS-FWD-2037 | FWD | 4176380 | 2625  | 2625  | 2625  | RTS_R4+_1222 |
| TSS-FWD-2038 | FWD | 4176412 | 684   | 686   | 687   | RTS_R4+_1222 |
| TSS-FWD-2039 | FWD | 4177606 | 32    | 32    | 32    | RTS_R4+_1223 |
| TSS-FWD-2040 | FWD | 4177645 | 4     | 20    | 38    | RTS_R4+_1223 |
| TSS-FWD-2041 | FWD | 4177802 | 10668 | 10674 | 10675 | RTS_R4+_1223 |
| TSS-FWD-2042 | FWD | 4177842 | 61    | 61    | 61    | RTS_R4+_1223 |
| TSS-FWD-2043 | FWD | 4177902 | 250   | 251   | 251   | RTS_R4+_1223 |
| TSS-FWD-2044 | FWD | 4177941 | 67    | 67    | 67    | RTS_R4+_1223 |
| TSS-FWD-2045 | FWD | 4179085 | 157   | 159   | 159   | RTS_R4+_1224 |
| TSS-FWD-2046 | FWD | 4179145 | 356   | 358   | 358   | RTS_R4+_1224 |
| TSS-FWD-2047 | FWD | 4179160 | 429   | 429   | 430   | RTS_R4+_1224 |
| TSS-FWD-2048 | FWD | 4179201 | 305   | 306   | 306   | RTS_R4+_1224 |
| TSS-FWD-2049 | FWD | 4187644 | 12    | 12    | 12    |              |
| TSS-FWD-2050 | FWD | 4194721 | 258   | 259   | 259   | RTS_R4+_1225 |
| TSS-FWD-2051 | FWD | 4194727 | 38    | 38    | 38    | RTS_R4+_1225 |
| TSS-FWD-2052 | FWD | 4195715 | 83    | 86    | 86    | RTS_R4+_1226 |
| TSS-FWD-2053 | FWD | 4195747 | 22    | 22    | 22    | RTS_R4+_1226 |
| TSS-FWD-2054 | FWD | 4196733 | 14    | 14    | 15    | RTS_R4+_1227 |
| TSS-FWD-2055 | FWD | 4197503 | 92    | 94    | 94    | RTS_R4+_1228 |
| TSS-FWD-2056 | FWD | 4198163 | 37    | 37    | 37    | RTS_R4+_1229 |
| TSS-FWD-2057 | FWD | 4198199 | 376   | 376   | 376   | RTS_R4+_1229 |
| TSS-FWD-2058 | FWD | 4199842 | 1     | 1     | 1     | RTS_R4+_1230 |
| TSS-FWD-2059 | FWD | 4201161 | 9     | 9     | 9     | RTS_R4+_1231 |
| TSS-FWD-2060 | FWD | 4201236 | 15    | 15    | 15    | RTS_R4+_1231 |
| TSS-FWD-2061 | FWD | 4205995 | 122   | 127   | 128   | RTS_R4+_1232 |
| TSS-FWD-2062 | FWD | 4212258 | 204   | 412   | 455   | RTS_R4+_1233 |
| TSS-FWD-2063 | FWD | 4212274 | 50    | 52    | 53    | RTS_R4+_1233 |
| TSS-FWD-2064 | FWD | 4213427 | 12    | 21    | 47    | RTS_R4+_1234 |
| TSS-FWD-2065 | FWD | 4213455 | 154   | 155   | 170   | RTS_R4+_1234 |
| TSS-FWD-2066 | FWD | 4216684 | 76    | 76    | 81    | RTS_R4+_1235 |
| TSS-FWD-2067 | FWD | 4216688 | 83    | 84    | 94    | RTS_R4+_1235 |
| TSS-FWD-2068 | FWD | 4221807 | 38    | 38    | 38    | RTS_R4+_1236 |
| TSS-FWD-2069 | FWD | 4221810 | 108   | 108   | 108   | RTS_R4+_1236 |
| TSS-FWD-2070 | FWD | 4225603 | 44    | 44    | 44    | RTS_R4+_1237 |
| TSS-FWD-2071 | FWD | 4225625 | 109   | 109   | 110   | RTS_R4+_1237 |
| TSS-FWD-2072 | FWD | 4228359 | 32    | 32    | 32    | RTS_R4+_1238 |
| TSS-FWD-2073 | FWD | 4231740 | 48    | 48    | 48    | RTS_R4+_1239 |
| TSS-FWD-2074 | FWD | 4231744 | 362   | 362   | 362   | RTS_R4+_1239 |

|              |     |         |     |      |      |              |
|--------------|-----|---------|-----|------|------|--------------|
| TSS-FWD-2075 | FWD | 4231747 | 230 | 231  | 231  | RTS_R4+_1239 |
| TSS-FWD-2076 | FWD | 4231755 | 654 | 655  | 655  | RTS_R4+_1239 |
| TSS-FWD-2077 | FWD | 4231763 | 101 | 101  | 101  | RTS_R4+_1239 |
| TSS-FWD-2078 | FWD | 4233961 | 3   | 3    | 3    | RTS_R4+_1240 |
| TSS-FWD-2079 | FWD | 4238446 | 4   | 4    | 4    | RTS_R4+_1241 |
| TSS-FWD-2080 | FWD | 4245009 | 6   | 6    | 6    | RTS_R4+_1242 |
| TSS-FWD-2081 | FWD | 4248736 | 1   | 1    | 1    |              |
| TSS-FWD-2082 | FWD | 4250505 | 45  | 45   | 47   | RTS_R4+_1243 |
| TSS-FWD-2083 | FWD | 4254480 | 17  | 17   | 17   | RTS_R4+_1244 |
| TSS-FWD-2084 | FWD | 4254510 | 22  | 22   | 22   | RTS_R4+_1244 |
| TSS-FWD-2085 | FWD | 4255110 | 182 | 196  | 213  | RTS_R4+_1245 |
| TSS-FWD-2086 | FWD | 4257202 | 1   | 1    | 4    | RTS_R4+_1247 |
| TSS-FWD-2087 | FWD | 4258190 | 4   | 4    | 4    |              |
| TSS-FWD-2088 | FWD | 4259493 | 61  | 61   | 61   | RTS_R4+_1248 |
| TSS-FWD-2089 | FWD | 4259617 | 245 | 245  | 245  | RTS_R4+_1248 |
| TSS-FWD-2090 | FWD | 4262309 | 135 | 137  | 137  | RTS_R4+_1249 |
| TSS-FWD-2091 | FWD | 4265105 | 26  | 26   | 26   | RTS_R4+_1250 |
| TSS-FWD-2092 | FWD | 4267378 | 2   | 2    | 2    | RTS_R4+_1251 |
| TSS-FWD-2093 | FWD | 4268237 | 88  | 88   | 89   | RTS_R4+_1252 |
| TSS-FWD-2094 | FWD | 4268243 | 145 | 145  | 145  | RTS_R4+_1252 |
| TSS-FWD-2095 | FWD | 4272113 | 22  | 22   | 22   | RTS_R4+_1253 |
| TSS-FWD-2096 | FWD | 4272121 | 22  | 23   | 34   | RTS_R4+_1253 |
| TSS-FWD-2097 | FWD | 4272127 | 23  | 26   | 27   | RTS_R4+_1253 |
| TSS-FWD-2098 | FWD | 4273426 | 19  | 19   | 21   | RTS_R4+_1254 |
| TSS-FWD-2099 | FWD | 4275329 | 15  | 15   | 15   | RTS_R4+_1255 |
| TSS-FWD-2100 | FWD | 4275468 | 8   | 8    | 8    | RTS_R4+_1255 |
| TSS-FWD-2101 | FWD | 4276331 | 86  | 86   | 86   | RTS_R4+_1256 |
| TSS-FWD-2102 | FWD | 4276341 | 45  | 45   | 45   | RTS_R4+_1256 |
| TSS-FWD-2103 | FWD | 4277939 | 127 | 127  | 127  | RTS_R4+_1257 |
| TSS-FWD-2104 | FWD | 4285433 | 29  | 29   | 30   |              |
| TSS-FWD-2105 | FWD | 4285560 | 18  | 18   | 18   |              |
| TSS-FWD-2106 | FWD | 4292398 | 14  | 15   | 15   | RTS_R4+_1258 |
| TSS-FWD-2107 | FWD | 4292518 | 22  | 22   | 22   | RTS_R4+_1258 |
| TSS-FWD-2108 | FWD | 4304901 |     | 1    | 1    | RTS_R4+_1259 |
| TSS-FWD-2109 | FWD | 4311281 | 4   | 4    | 4    | RTS_R4+_1260 |
| TSS-FWD-2110 | FWD | 4311290 | 5   | 5    | 5    | RTS_R4+_1260 |
| TSS-FWD-2111 | FWD | 4311337 | 6   | 6    | 6    | RTS_R4+_1260 |
| TSS-FWD-2112 | FWD | 4311869 | 1   | 1    | 1    | RTS_R4+_1261 |
| TSS-FWD-2113 | FWD | 4325082 | 7   | 7    | 7    | RTS_R4+_1262 |
| TSS-FWD-2114 | FWD | 4325135 | 7   | 7    | 7    | RTS_R4+_1262 |
| TSS-FWD-2115 | FWD | 4327165 | 9   | 9    | 9    | RTS_R4+_1263 |
| TSS-FWD-2116 | FWD | 4328343 | 13  | 13   | 13   | RTS_R4+_1264 |
| TSS-FWD-2117 | FWD | 4328375 | 421 | 421  | 421  | RTS_R4+_1264 |
| TSS-FWD-2118 | FWD | 4328415 | 167 | 170  | 170  | RTS_R4+_1264 |
| TSS-FWD-2119 | FWD | 4328430 | 2   | 3    | 7    | RTS_R4+_1264 |
| TSS-FWD-2120 | FWD | 4339847 | 3   | 3    | 3    | RTS_R4+_1265 |
| TSS-FWD-2121 | FWD | 4339910 | 5   | 5    | 5    | RTS_R4+_1265 |
| TSS-FWD-2122 | FWD | 4349836 | 65  | 65   | 78   | RTS_R4+_1266 |
| TSS-FWD-2123 | FWD | 4359542 |     | 46   | 47   | RTS_R4+_1267 |
| TSS-FWD-2124 | FWD | 4366136 | 1   | 1    | 1    | RTS_R4+_1268 |
| TSS-FWD-2125 | FWD | 4366642 | 130 | 149  | 153  | RTS_R4+_1269 |
| TSS-FWD-2126 | FWD | 4368639 | 825 | 1394 | 1411 | RTS_R4+_1270 |
| TSS-FWD-2127 | FWD | 4368675 | 850 | 1124 | 1141 | RTS_R4+_1270 |
| TSS-FWD-2128 | FWD | 4368639 | 825 | 1394 | 1411 | RTS_R4+_1271 |
| TSS-FWD-2129 | FWD | 4368675 | 850 | 1124 | 1141 | RTS_R4+_1271 |
| TSS-FWD-2130 | FWD | 4368682 | 69  | 120  | 126  | RTS_R4+_1271 |
| TSS-FWD-2131 | FWD | 4368715 | 103 | 127  | 131  | RTS_R4+_1271 |
| TSS-FWD-2132 | FWD | 4368920 | 129 | 175  | 178  | RTS_R4+_1271 |
| TSS-FWD-2133 | FWD | 4368932 | 760 | 862  | 862  | RTS_R4+_1271 |
| TSS-FWD-2134 | FWD | 4368981 | 260 | 306  | 310  | RTS_R4+_1271 |
| TSS-FWD-2135 | FWD | 4368990 | 39  | 78   | 82   | RTS_R4+_1271 |
| TSS-FWD-2136 | FWD | 4370784 | 640 | 648  | 652  | RTS_R4+_1272 |
| TSS-FWD-2137 | FWD | 4373678 | 293 | 298  | 298  | RTS_R4+_1273 |

|              |     |         |     |     |     |              |
|--------------|-----|---------|-----|-----|-----|--------------|
| TSS-FWD-2138 | FWD | 4374533 | 129 | 171 | 506 | RTS_R4+_1275 |
| TSS-FWD-2139 | FWD | 4374822 | 25  | 27  | 27  | RTS_R4+_1276 |
| TSS-FWD-2140 | FWD | 4380464 | 9   | 9   | 9   | RTS_R4+_1277 |
| TSS-FWD-2141 | FWD | 4380642 | 1   | 1   | 1   | RTS_R4+_1277 |
| TSS-FWD-2142 | FWD | 4389584 | 453 | 492 | 494 | RTS_R4+_1278 |
| TSS-FWD-2143 | FWD | 4389592 | 218 | 236 | 236 | RTS_R4+_1278 |
| TSS-FWD-2144 | FWD | 4389598 | 170 | 178 | 179 | RTS_R4+_1278 |
| TSS-FWD-2145 | FWD | 4390242 | 24  | 129 | 171 | RTS_R4+_1279 |
| TSS-FWD-2146 | FWD | 4391699 | 16  | 16  | 16  | RTS_R4+_1280 |
| TSS-FWD-2147 | FWD | 4391960 | 93  | 93  | 93  | RTS_R4+_1280 |
| TSS-FWD-2148 | FWD | 4392051 | 49  | 50  | 54  | RTS_R4+_1280 |
| TSS-FWD-2149 | FWD | 4393183 | 5   | 5   | 5   | RTS_R4+_1281 |
| TSS-FWD-2150 | FWD | 4395239 | 67  | 68  | 68  | RTS_R4+_1282 |
| TSS-FWD-2151 | FWD | 4396973 | 25  | 25  | 25  | RTS_R4+_1283 |
| TSS-FWD-2152 | FWD | 4397075 | 7   | 20  | 20  | RTS_R4+_1283 |
| TSS-FWD-2153 | FWD | 4397246 | 25  | 25  | 25  | RTS_R4+_1283 |
| TSS-FWD-2154 | FWD | 4397315 | 25  | 25  | 25  | RTS_R4+_1283 |
| TSS-FWD-2155 | FWD | 4397421 | 1   | 31  | 35  | RTS_R4+_1283 |
| TSS-FWD-2156 | FWD | 4398256 | 351 | 351 | 351 | RTS_R4+_1284 |
| TSS-FWD-2157 | FWD | 4398275 | 145 | 145 | 146 | RTS_R4+_1284 |
| TSS-FWD-2158 | FWD | 4402337 | 6   | 6   | 6   | RTS_R4+_1285 |
| TSS-FWD-2159 | FWD | 4402348 | 4   | 4   | 4   | RTS_R4+_1285 |
| TSS-FWD-2160 | FWD | 4402683 | 303 | 306 | 320 | RTS_R4+_1286 |
| TSS-FWD-2161 | FWD | 4402688 | 339 | 349 | 349 | RTS_R4+_1286 |
| TSS-FWD-2162 | FWD | 4403905 | 11  | 11  | 11  | RTS_R4+_1287 |
| TSS-FWD-2163 | FWD | 4403916 | 14  | 14  | 14  | RTS_R4+_1287 |
| TSS-FWD-2164 | FWD | 4404175 | 71  | 71  | 71  | RTS_R4+_1288 |
| TSS-FWD-2165 | FWD | 4407240 | 21  | 25  | 25  | RTS_R4+_1289 |
| TSS-FWD-2166 | FWD | 4407246 | 15  | 16  | 17  | RTS_R4+_1289 |
| TSS-FWD-2167 | FWD | 4407962 | 2   | 2   | 2   |              |
| TSS-FWD-2168 | FWD | 4409333 | 6   | 6   | 6   |              |
| TSS-FWD-2169 | FWD | 4412272 | 9   | 10  | 21  | RTS_R4+_1290 |
| TSS-FWD-2170 | FWD | 4414959 | 64  | 64  | 64  | RTS_R4+_1291 |
| TSS-FWD-2171 | FWD | 4423048 | 129 | 140 | 140 | RTS_R4+_1292 |
| TSS-FWD-2172 | FWD | 4423050 | 127 | 128 | 128 | RTS_R4+_1292 |
| TSS-FWD-2173 | FWD | 4424995 | 2   | 2   | 2   | RTS_R4+_1293 |
| TSS-FWD-2174 | FWD | 4426887 | 31  | 31  | 31  | RTS_R4+_1294 |
| TSS-FWD-2175 | FWD | 4426894 | 35  | 35  | 35  | RTS_R4+_1294 |
| TSS-FWD-2176 | FWD | 4426931 | 529 | 530 | 530 | RTS_R4+_1294 |
| TSS-FWD-2177 | FWD | 4427835 | 89  | 91  | 97  | RTS_R4+_1295 |
| TSS-FWD-2178 | FWD | 4428853 | 30  | 30  | 31  | RTS_R4+_1296 |
| TSS-FWD-2179 | FWD | 4429034 | 21  | 21  | 23  | RTS_R4+_1296 |
| TSS-FWD-2180 | FWD | 4429105 | 20  | 30  | 30  | RTS_R4+_1296 |
| TSS-FWD-2181 | FWD | 4432106 | 48  | 50  | 54  | RTS_R4+_1297 |
| TSS-FWD-2182 | FWD | 4434587 | 10  | 12  | 76  | RTS_R4+_1298 |
| TSS-FWD-2183 | FWD | 4434590 | 470 | 476 | 537 | RTS_R4+_1298 |
| TSS-FWD-2184 | FWD | 4434600 | 33  | 36  | 50  | RTS_R4+_1298 |
| TSS-FWD-2185 | FWD | 4437157 | 5   | 5   | 5   | RTS_R4+_1299 |
| TSS-FWD-2186 | FWD | 4437534 | 33  | 35  | 40  | RTS_R4+_1300 |
| TSS-FWD-2187 | FWD | 4437536 | 28  | 28  | 29  | RTS_R4+_1300 |
| TSS-FWD-2188 | FWD | 4437667 | 6   | 7   | 38  | RTS_R4+_1300 |
| TSS-FWD-2189 | FWD | 4440245 | 36  | 36  | 36  | RTS_R4+_1301 |
| TSS-FWD-2190 | FWD | 4440274 | 39  | 40  | 40  | RTS_R4+_1301 |
| TSS-FWD-2191 | FWD | 4440298 | 31  | 31  | 31  | RTS_R4+_1301 |
| TSS-FWD-2192 | FWD | 4440313 | 38  | 38  | 38  | RTS_R4+_1301 |
| TSS-FWD-2193 | FWD | 4446453 | 63  | 66  | 71  | RTS_R4+_1302 |
| TSS-FWD-2194 | FWD | 4447938 |     |     | 9   | RTS_R4+_1303 |
| TSS-FWD-2195 | FWD | 4447946 |     |     | 9   | RTS_R4+_1303 |
| TSS-FWD-2196 | FWD | 4453785 | 247 | 251 | 251 | RTS_R4+_1304 |
| TSS-FWD-2197 | FWD | 4455967 | 50  | 50  | 50  | RTS_R4+_1305 |
| TSS-FWD-2198 | FWD | 4457596 | 21  | 21  | 22  | RTS_R4+_1306 |
| TSS-FWD-2199 | FWD | 4465385 | 104 | 121 | 121 | RTS_R4+_1307 |
| TSS-FWD-2200 | FWD | 4465514 | 56  | 65  | 65  | RTS_R4+_1307 |

|              |     |         |      |      |      |              |
|--------------|-----|---------|------|------|------|--------------|
| TSS-FWD-2201 | FWD | 4465552 | 22   | 22   | 22   | RTS_R4+_1307 |
| TSS-FWD-2202 | FWD | 4467531 | 6    | 6    | 6    | RTS_R4+_1308 |
| TSS-FWD-2203 | FWD | 4472119 | 17   | 17   | 17   | RTS_R4+_1309 |
| TSS-FWD-2204 | FWD | 4472123 | 17   | 17   | 17   | RTS_R4+_1309 |
| TSS-FWD-2205 | FWD | 4472852 | 151  | 151  | 162  | RTS_R4+_1310 |
| TSS-FWD-2206 | FWD | 4473418 | 18   | 18   | 18   |              |
| TSS-FWD-2207 | FWD | 4475183 | 11   | 12   | 14   | RTS_R4+_1311 |
| TSS-FWD-2208 | FWD | 4476468 | 76   | 87   | 121  | RTS_R4+_1312 |
| TSS-FWD-2209 | FWD | 4484153 | 6    | 9    | 26   | RTS_R4+_1313 |
| TSS-FWD-2210 | FWD | 4492620 | 2    | 2    | 2    | RTS_R4+_1314 |
| TSS-FWD-2211 | FWD | 4494428 | 1    | 72   | 335  | RTS_R4+_1315 |
| TSS-FWD-2212 | FWD | 4494472 | 1    | 19   | 71   | RTS_R4+_1316 |
| TSS-FWD-2213 | FWD | 4496128 | 5    | 5    | 5    | RTS_R4+_1317 |
| TSS-FWD-2214 | FWD | 4501862 | 23   | 24   | 24   | RTS_R4+_1318 |
| TSS-FWD-2215 | FWD | 4501907 | 35   | 35   | 35   | RTS_R4+_1318 |
| TSS-FWD-2216 | FWD | 4505417 | 2    | 2    | 2    | RTS_R4+_1320 |
| TSS-FWD-2217 | FWD | 4506976 | 1    | 1    | 1    | RTS_R4+_1321 |
| TSS-FWD-2218 | FWD | 4516534 | 14   | 14   | 14   | RTS_R4+_1322 |
| TSS-FWD-2219 | FWD | 4518966 | 10   | 10   | 10   | RTS_R4+_1323 |
| TSS-FWD-2220 | FWD | 4524136 | 4    | 6    | 6    | RTS_R4+_1324 |
| TSS-FWD-2221 | FWD | 4525999 | 67   | 73   | 84   | RTS_R4+_1325 |
| TSS-FWD-2222 | FWD | 4532242 | 5    | 5    | 6    | RTS_R4+_1326 |
| TSS-FWD-2223 | FWD | 4534426 |      |      | 2    | RTS_R4+_1327 |
| TSS-FWD-2224 | FWD | 4538709 | 50   | 50   | 50   | RTS_R4+_1328 |
| TSS-FWD-2225 | FWD | 4540073 | 11   | 11   | 11   | RTS_R4+_1329 |
| TSS-FWD-2226 | FWD | 4541107 | 23   | 25   | 25   | RTS_R4+_1330 |
| TSS-FWD-2227 | FWD | 4542527 | 48   | 48   | 48   | RTS_R4+_1331 |
| TSS-FWD-2228 | FWD | 4544032 |      | 5    | 6    | RTS_R4+_1332 |
| TSS-FWD-2229 | FWD | 4544203 | 4    | 4    | 4    | RTS_R4+_1332 |
| TSS-FWD-2230 | FWD | 4546952 | 9    | 9    | 9    | RTS_R4+_1333 |
| TSS-FWD-2231 | FWD | 4548770 | 1    | 1    | 1    | RTS_R4+_1334 |
| TSS-FWD-2232 | FWD | 4549544 | 21   | 26   | 26   | RTS_R4+_1335 |
| TSS-FWD-2233 | FWD | 4552503 | 12   | 12   | 15   | RTS_R4+_1336 |
| TSS-FWD-2234 | FWD | 4552566 | 13   | 16   | 16   | RTS_R4+_1336 |
| TSS-FWD-2235 | FWD | 4554785 | 14   | 14   | 14   | RTS_R4+_1337 |
| TSS-FWD-2236 | FWD | 4561417 | 8    | 8    | 8    | RTS_R4+_1339 |
| TSS-FWD-2237 | FWD | 4567522 | 9    | 9    | 9    | RTS_R4+_1340 |
| TSS-FWD-2238 | FWD | 4567539 | 15   | 15   | 15   | RTS_R4+_1340 |
| TSS-FWD-2239 | FWD | 4567626 | 10   | 10   | 10   | RTS_R4+_1340 |
| TSS-FWD-2240 | FWD | 4567630 | 9    | 9    | 9    | RTS_R4+_1340 |
| TSS-FWD-2241 | FWD | 4570182 | 33   | 33   | 33   | RTS_R4+_1342 |
| TSS-FWD-2242 | FWD | 4570222 | 22   | 22   | 22   | RTS_R4+_1342 |
| TSS-FWD-2243 | FWD | 4570371 | 60   | 60   | 60   | RTS_R4+_1342 |
| TSS-FWD-2244 | FWD | 4570385 | 176  | 176  | 176  | RTS_R4+_1342 |
| TSS-FWD-2245 | FWD | 4570406 | 64   | 64   | 64   | RTS_R4+_1342 |
| TSS-FWD-2246 | FWD | 4576539 | 2    | 2    | 3    | RTS_R4+_1343 |
| TSS-FWD-2247 | FWD | 4577858 |      | 44   | 126  | RTS_R4+_1344 |
| TSS-FWD-2248 | FWD | 4584938 | 11   | 11   | 11   | RTS_R4+_1345 |
| TSS-FWD-2249 | FWD | 4584955 | 14   | 14   | 14   | RTS_R4+_1345 |
| TSS-FWD-2250 | FWD | 4589656 | 559  | 559  | 559  | RTS_R4+_1346 |
| TSS-FWD-2251 | FWD | 4594170 | 8    | 9    | 9    | RTS_R4+_1347 |
| TSS-FWD-2252 | FWD | 4603800 | 18   | 18   | 25   | RTS_R4+_1348 |
| TSS-FWD-2253 | FWD | 4605804 | 18   | 19   | 19   | RTS_R4+_1349 |
| TSS-FWD-2254 | FWD | 4609175 | 207  | 208  | 215  | RTS_R4+_1350 |
| TSS-FWD-2255 | FWD | 4609257 | 1195 | 1195 | 1213 | RTS_R4+_1350 |
| TSS-FWD-2256 | FWD | 4609269 | 220  | 220  | 223  | RTS_R4+_1350 |
| TSS-FWD-2257 | FWD | 4609356 | 702  | 705  | 708  | RTS_R4+_1350 |
| TSS-FWD-2258 | FWD | 4609391 | 170  | 170  | 172  | RTS_R4+_1350 |
| TSS-FWD-2259 | FWD | 4610406 | 7    | 8    | 12   | RTS_R4+_1351 |
| TSS-FWD-2260 | FWD | 4614203 |      |      | 11   | RTS_R4+_1352 |
| TSS-FWD-2261 | FWD | 4615133 | 33   | 33   | 40   | RTS_R4+_1353 |
| TSS-FWD-2262 | FWD | 4615243 | 37   | 37   | 37   | RTS_R4+_1353 |
| TSS-FWD-2263 | FWD | 4615251 | 47   | 47   | 47   | RTS_R4+_1353 |

|              |     |         |      |      |      |              |
|--------------|-----|---------|------|------|------|--------------|
| TSS-FWD-2264 | FWD | 4615300 | 51   | 51   | 51   | RTS_R4+_1353 |
| TSS-FWD-2265 | FWD | 4615316 | 29   | 33   | 34   | RTS_R4+_1353 |
| TSS-FWD-2266 | FWD | 4617590 | 22   | 23   | 24   | RTS_R4+_1354 |
| TSS-FWD-2267 | FWD | 4617600 | 24   | 27   | 32   | RTS_R4+_1354 |
| TSS-FWD-2268 | FWD | 4619764 | 30   | 31   | 31   | RTS_R4+_1355 |
| TSS-FWD-2269 | FWD | 4622879 | 66   | 66   | 66   | RTS_R4+_1356 |
| TSS-FWD-2270 | FWD | 4625326 | 12   | 12   | 20   | RTS_R4+_1357 |
| TSS-FWD-2271 | FWD | 4628705 | 46   | 47   | 48   | RTS_R4+_1358 |
| TSS-FWD-2272 | FWD | 4628733 | 75   | 75   | 75   | RTS_R4+_1358 |
| TSS-FWD-2273 | FWD | 4630721 | 38   | 39   | 39   | RTS_R4+_1359 |
| TSS-FWD-2274 | FWD | 4630727 | 38   | 38   | 39   | RTS_R4+_1359 |
| TSS-FWD-2275 | FWD | 4631778 | 12   | 12   | 12   | RTS_R4+_1360 |
| TSS-FWD-2276 | FWD | 4631788 | 13   | 13   | 14   | RTS_R4+_1360 |
| TSS-FWD-2277 | FWD | 4633345 | 15   | 15   | 15   | RTS_R4+_1361 |
| TSS-FWD-2278 | FWD | 4633366 | 17   | 17   | 17   | RTS_R4+_1361 |
| TSS-FWD-2279 | FWD | 4633418 | 18   | 18   | 18   | RTS_R4+_1361 |
| TSS-FWD-2280 | FWD | 4636134 | 9    | 9    | 9    | RTS_R4+_1362 |
| TSS-FWD-2281 | FWD | 4638666 | 45   | 45   | 45   | RTS_R4+_1364 |
| TSS-REV-1    | REV | 6482    | 139  | 139  | 139  | RTS_R4-_1    |
| TSS-REV-2    | REV | 8053    | 11   | 11   | 11   | RTS_R4-_2    |
| TSS-REV-3    | REV | 10430   | 10   | 12   | 12   | RTS_R4-_3    |
| TSS-REV-4    | REV | 17146   | 20   | 21   | 22   | RTS_R4-_5    |
| TSS-REV-5    | REV | 20599   | 2    | 2    | 2    | RTS_R4-_6    |
| TSS-REV-6    | REV | 21112   | 3731 | 3738 | 3738 | RTS_R4-_7    |
| TSS-REV-7    | REV | 21118   | 5628 | 5635 | 5635 | RTS_R4-_7    |
| TSS-REV-8    | REV | 21159   | 917  | 918  | 918  | RTS_R4-_7    |
| TSS-REV-9    | REV | 21207   | 7209 | 7210 | 7211 | RTS_R4-_7    |
| TSS-REV-10   | REV | 36281   | 15   | 15   | 15   | RTS_R4-_8    |
| TSS-REV-11   | REV | 36358   | 24   | 24   | 24   | RTS_R4-_8    |
| TSS-REV-12   | REV | 36430   | 20   | 20   | 20   | RTS_R4-_8    |
| TSS-REV-13   | REV | 36489   | 24   | 24   | 24   | RTS_R4-_8    |
| TSS-REV-14   | REV | 37942   | 18   | 18   | 18   | RTS_R4-_9    |
| TSS-REV-15   | REV | 39918   | 2    | 2    | 2    | RTS_R4-_10   |
| TSS-REV-16   | REV | 52034   | 246  | 250  | 303  | RTS_R4-_11   |
| TSS-REV-17   | REV | 52077   | 86   | 86   | 86   | RTS_R4-_11   |
| TSS-REV-18   | REV | 52084   | 48   | 48   | 48   | RTS_R4-_11   |
| TSS-REV-19   | REV | 52595   | 132  | 132  | 132  | RTS_R4-_12   |
| TSS-REV-20   | REV | 52654   | 62   | 62   | 62   | RTS_R4-_12   |
| TSS-REV-21   | REV | 55387   | 81   | 81   | 82   | RTS_R4-_13   |
| TSS-REV-22   | REV | 57156   | 22   | 22   | 22   | RTS_R4-_14   |
| TSS-REV-23   | REV | 57241   | 520  | 526  | 528  | RTS_R4-_14   |
| TSS-REV-24   | REV | 57253   | 133  | 133  | 141  | RTS_R4-_14   |
| TSS-REV-25   | REV | 63357   | 123  | 123  | 123  | RTS_R4-_15   |
| TSS-REV-26   | REV | 63468   | 11   | 11   | 11   | RTS_R4-_15   |
| TSS-REV-27   | REV | 63531   | 11   | 11   | 11   | RTS_R4-_15   |
| TSS-REV-28   | REV | 63588   | 3    | 7    | 7    | RTS_R4-_15   |
| TSS-REV-29   | REV | 65803   | 6    | 6    | 7    | RTS_R4-_16   |
| TSS-REV-30   | REV | 70077   | 2    | 2    | 2    | RTS_R4-_17   |
| TSS-REV-31   | REV | 75664   | 10   | 10   | 10   | RTS_R4-_18   |
| TSS-REV-32   | REV | 77336   | 16   | 17   | 17   | RTS_R4-_19   |
| TSS-REV-33   | REV | 83728   | 652  | 668  | 712  | RTS_R4-_20   |
| TSS-REV-34   | REV | 83735   | 442  | 452  | 457  | RTS_R4-_20   |
| TSS-REV-35   | REV | 112699  | 177  | 179  | 179  | RTS_R4-_21   |
| TSS-REV-36   | REV | 112703  | 260  | 263  | 263  | RTS_R4-_21   |
| TSS-REV-37   | REV | 112757  | 489  | 489  | 489  | RTS_R4-_21   |
| TSS-REV-38   | REV | 113322  | 115  | 115  | 115  | RTS_R4-_22   |
| TSS-REV-39   | REV | 117052  | 2    | 2    | 2    | RTS_R4-_23   |
| TSS-REV-40   | REV | 118679  | 102  | 103  | 104  | RTS_R4-_24   |
| TSS-REV-41   | REV | 121647  | 178  | 178  | 179  | RTS_R4-_25   |
| TSS-REV-42   | REV | 121676  | 32   | 32   | 37   | RTS_R4-_25   |
| TSS-REV-43   | REV | 136550  | 11   | 12   | 12   | RTS_R4-_26   |
| TSS-REV-44   | REV | 136939  | 19   | 19   | 19   | RTS_R4-_27   |
| TSS-REV-45   | REV | 136942  | 19   | 19   | 19   | RTS_R4-_27   |

|             |     |        |      |      |      |             |
|-------------|-----|--------|------|------|------|-------------|
| TSS-REV-46  | REV | 141254 | 6    | 6    | 6    | RTS_R4_-_28 |
| TSS-REV-47  | REV | 141263 | 6    | 6    | 10   | RTS_R4_-_28 |
| TSS-REV-48  | REV | 142694 | 62   | 62   | 62   | RTS_R4_-_29 |
| TSS-REV-49  | REV | 142703 | 967  | 969  | 970  | RTS_R4_-_29 |
| TSS-REV-50  | REV | 146751 | 303  | 306  | 307  | RTS_R4_-_30 |
| TSS-REV-51  | REV | 146754 | 418  | 422  | 422  | RTS_R4_-_30 |
| TSS-REV-52  | REV | 149617 | 117  | 119  | 120  | RTS_R4_-_31 |
| TSS-REV-53  | REV | 149630 | 423  | 427  | 427  | RTS_R4_-_31 |
| TSS-REV-54  | REV | 159154 | 32   | 32   | 32   | RTS_R4_-_32 |
| TSS-REV-55  | REV | 159166 | 93   | 93   | 93   | RTS_R4_-_32 |
| TSS-REV-56  | REV | 159171 | 133  | 134  | 134  | RTS_R4_-_32 |
| TSS-REV-57  | REV | 160651 | 241  | 247  | 249  | RTS_R4_-_33 |
| TSS-REV-58  | REV | 160657 | 251  | 257  | 257  | RTS_R4_-_33 |
| TSS-REV-59  | REV | 160760 | 153  | 158  | 161  | RTS_R4_-_33 |
| TSS-REV-60  | REV | 162053 | 42   | 42   | 42   | RTS_R4_-_34 |
| TSS-REV-61  | REV | 167416 | 8    | 8    | 12   | RTS_R4_-_35 |
| TSS-REV-62  | REV | 174907 | 28   | 28   | 28   | RTS_R4_-_36 |
| TSS-REV-63  | REV | 174992 | 134  | 134  | 134  | RTS_R4_-_36 |
| TSS-REV-64  | REV | 179181 | 180  | 180  | 180  | RTS_R4_-_37 |
| TSS-REV-65  | REV | 184122 | 155  | 159  | 160  | RTS_R4_-_38 |
| TSS-REV-66  | REV | 184124 | 193  | 199  | 199  | RTS_R4_-_38 |
| TSS-REV-67  | REV | 185972 | 36   | 36   | 36   | RTS_R4_-_39 |
| TSS-REV-68  | REV | 185976 | 612  | 612  | 612  | RTS_R4_-_39 |
| TSS-REV-69  | REV | 186073 | 54   | 54   | 54   | RTS_R4_-_39 |
| TSS-REV-70  | REV | 189532 | 89   | 90   | 93   | RTS_R4_-_41 |
| TSS-REV-71  | REV | 189545 | 165  | 165  | 165  | RTS_R4_-_41 |
| TSS-REV-72  | REV | 189553 | 2210 | 2216 | 2219 | RTS_R4_-_41 |
| TSS-REV-73  | REV | 214163 | 55   | 56   | 57   | RTS_R4_-_42 |
| TSS-REV-74  | REV | 218831 | 2551 | 2568 | 2568 | RTS_R4_-_43 |
| TSS-REV-75  | REV | 220022 | 59   | 59   | 59   | RTS_R4_-_44 |
| TSS-REV-76  | REV | 222714 | 292  | 299  | 299  | RTS_R4_-_45 |
| TSS-REV-77  | REV | 230906 | 5    | 5    | 5    | RTS_R4_-_46 |
| TSS-REV-78  | REV | 233980 | 47   | 47   | 47   | RTS_R4_-_47 |
| TSS-REV-79  | REV | 234821 | 73   | 74   | 74   | RTS_R4_-_48 |
| TSS-REV-80  | REV | 236044 | 29   | 29   | 29   | RTS_R4_-_49 |
| TSS-REV-81  | REV | 240216 | 2    | 3    | 4    | RTS_R4_-_50 |
| TSS-REV-82  | REV | 243346 | 69   | 69   | 91   | RTS_R4_-_51 |
| TSS-REV-83  | REV | 245825 | 13   | 13   | 13   | RTS_R4_-_52 |
| TSS-REV-84  | REV | 246533 | 98   | 98   | 102  | RTS_R4_-_53 |
| TSS-REV-85  | REV | 255770 | 153  | 153  | 153  | RTS_R4_-_55 |
| TSS-REV-86  | REV | 255776 | 1107 | 1107 | 1108 | RTS_R4_-_55 |
| TSS-REV-87  | REV | 255807 | 406  | 407  | 407  | RTS_R4_-_55 |
| TSS-REV-88  | REV | 259389 | 7    | 7    | 7    |             |
| TSS-REV-89  | REV | 262302 | 23   | 24   | 24   | RTS_R4_-_56 |
| TSS-REV-90  | REV | 265294 | 2    | 2    | 2    | RTS_R4_-_57 |
| TSS-REV-91  | REV | 268252 | 11   | 11   | 11   | RTS_R4_-_58 |
| TSS-REV-92  | REV | 279354 | 3    | 3    | 3    | RTS_R4_-_61 |
| TSS-REV-93  | REV | 279384 | 3    | 3    | 3    | RTS_R4_-_61 |
| TSS-REV-94  | REV | 279978 | 9    | 9    | 9    | RTS_R4_-_62 |
| TSS-REV-95  | REV | 288412 | 36   | 36   | 36   | RTS_R4_-_63 |
| TSS-REV-96  | REV | 289564 | 2380 | 2403 | 2403 | RTS_R4_-_64 |
| TSS-REV-97  | REV | 290655 |      | 1    | 1    | RTS_R4_-_65 |
| TSS-REV-98  | REV | 292170 | 16   | 16   | 16   |             |
| TSS-REV-99  | REV | 294844 | 982  | 990  | 991  | RTS_R4_-_66 |
| TSS-REV-100 | REV | 296372 | 10   | 10   | 10   | RTS_R4_-_67 |
| TSS-REV-101 | REV | 301863 | 5    | 5    | 5    | RTS_R4_-_68 |
| TSS-REV-102 | REV | 303428 | 10   | 10   | 10   | RTS_R4_-_69 |
| TSS-REV-103 | REV | 303438 | 9    | 9    | 9    | RTS_R4_-_69 |
| TSS-REV-104 | REV | 305654 | 2    | 2    | 2    | RTS_R4_-_70 |
| TSS-REV-105 | REV | 309944 | 64   | 66   | 68   | RTS_R4_-_71 |
| TSS-REV-106 | REV | 312027 | 3113 | 3113 | 3148 | RTS_R4_-_72 |
| TSS-REV-107 | REV | 312456 |      | 1    | 1    | RTS_R4_-_73 |
| TSS-REV-108 | REV | 315721 | 2    | 2    | 2    | RTS_R4_-_74 |

|             |     |        |      |      |      |              |
|-------------|-----|--------|------|------|------|--------------|
| TSS-REV-109 | REV | 315750 | 3    | 3    | 3    | RTS_R4_-_74  |
| TSS-REV-110 | REV | 319257 | 3    | 3    | 3    | RTS_R4_-_75  |
| TSS-REV-111 | REV | 328585 | 7    | 7    | 7    | RTS_R4_-_76  |
| TSS-REV-112 | REV | 333688 | 12   | 18   | 20   | RTS_R4_-_77  |
| TSS-REV-113 | REV | 345550 | 4    | 7    | 8    | RTS_R4_-_78  |
| TSS-REV-114 | REV | 347693 | 19   | 19   | 23   | RTS_R4_-_79  |
| TSS-REV-115 | REV | 357932 | 6    | 7    | 7    | RTS_R4_-_80  |
| TSS-REV-116 | REV | 357938 | 8    | 8    | 8    | RTS_R4_-_80  |
| TSS-REV-117 | REV | 367754 | 25   | 25   | 26   | RTS_R4_-_81  |
| TSS-REV-118 | REV | 377685 | 50   | 50   | 50   | RTS_R4_-_82  |
| TSS-REV-119 | REV | 379124 |      | 3    | 3    | RTS_R4_-_83  |
| TSS-REV-120 | REV | 380428 | 1    | 1    | 1    | RTS_R4_-_84  |
| TSS-REV-121 | REV | 383207 | 3    | 3    | 3    |              |
| TSS-REV-122 | REV | 384055 | 16   | 16   | 16   |              |
| TSS-REV-123 | REV | 388978 | 326  | 328  | 329  | RTS_R4_-_86  |
| TSS-REV-124 | REV | 392607 | 11   | 11   | 11   | RTS_R4_-_87  |
| TSS-REV-125 | REV | 392668 | 7    | 7    | 7    | RTS_R4_-_87  |
| TSS-REV-126 | REV | 395543 | 88   | 88   | 88   | RTS_R4_-_88  |
| TSS-REV-127 | REV | 395587 | 46   | 46   | 46   | RTS_R4_-_88  |
| TSS-REV-128 | REV | 398533 | 2    | 2    | 2    | RTS_R4_-_89  |
| TSS-REV-129 | REV | 400176 | 50   | 50   | 50   | RTS_R4_-_90  |
| TSS-REV-130 | REV | 402878 | 10   | 10   | 10   | RTS_R4_-_91  |
| TSS-REV-131 | REV | 402928 | 8    | 8    | 8    | RTS_R4_-_91  |
| TSS-REV-132 | REV | 404905 | 81   | 81   | 81   | RTS_R4_-_92  |
| TSS-REV-133 | REV | 404910 | 273  | 273  | 275  | RTS_R4_-_92  |
| TSS-REV-134 | REV | 407786 | 19   | 19   | 26   | RTS_R4_-_93  |
| TSS-REV-135 | REV | 409274 | 141  | 141  | 141  | RTS_R4_-_94  |
| TSS-REV-136 | REV | 411748 |      | 3    | 6    | RTS_R4_-_95  |
| TSS-REV-137 | REV | 416200 | 13   | 13   | 13   | RTS_R4_-_96  |
| TSS-REV-138 | REV | 420346 | 1    | 1    | 1    | RTS_R4_-_97  |
| TSS-REV-139 | REV | 424218 | 8    | 8    | 8    | RTS_R4_-_98  |
| TSS-REV-140 | REV | 431276 | 83   | 83   | 83   | RTS_R4_-_99  |
| TSS-REV-141 | REV | 431302 | 183  | 183  | 183  | RTS_R4_-_99  |
| TSS-REV-142 | REV | 431315 | 99   | 102  | 104  | RTS_R4_-_99  |
| TSS-REV-143 | REV | 431348 | 47   | 47   | 47   | RTS_R4_-_99  |
| TSS-REV-144 | REV | 432100 | 3    | 5    | 5    | RTS_R4_-_100 |
| TSS-REV-145 | REV | 437508 | 258  | 261  | 276  | RTS_R4_-_101 |
| TSS-REV-146 | REV | 439624 | 68   | 68   | 68   | RTS_R4_-_102 |
| TSS-REV-147 | REV | 439634 | 143  | 143  | 143  | RTS_R4_-_102 |
| TSS-REV-148 | REV | 440597 | 9    | 9    | 9    | RTS_R4_-_103 |
| TSS-REV-149 | REV | 443779 | 55   | 56   | 61   | RTS_R4_-_104 |
| TSS-REV-150 | REV | 443784 | 64   | 65   | 65   | RTS_R4_-_104 |
| TSS-REV-151 | REV | 445520 | 10   | 10   | 10   | RTS_R4_-_105 |
| TSS-REV-152 | REV | 450858 | 69   | 70   | 70   | RTS_R4_-_106 |
| TSS-REV-153 | REV | 450873 | 83   | 83   | 83   | RTS_R4_-_106 |
| TSS-REV-154 | REV | 450877 | 2989 | 2989 | 2993 | RTS_R4_-_106 |
| TSS-REV-155 | REV | 453415 | 50   | 52   | 52   | RTS_R4_-_107 |
| TSS-REV-156 | REV | 453421 | 155  | 155  | 155  | RTS_R4_-_107 |
| TSS-REV-157 | REV | 453433 | 2965 | 2978 | 2978 | RTS_R4_-_107 |
| TSS-REV-158 | REV | 464796 | 23   | 23   | 23   | RTS_R4_-_108 |
| TSS-REV-159 | REV | 466565 | 3    | 3    | 3    | RTS_R4_-_109 |
| TSS-REV-160 | REV | 466570 | 3    | 3    | 5    | RTS_R4_-_109 |
| TSS-REV-161 | REV | 474425 | 18   | 20   | 20   | RTS_R4_-_110 |
| TSS-REV-162 | REV | 475536 | 16   | 16   | 16   | RTS_R4_-_111 |
| TSS-REV-163 | REV | 477866 | 11   | 11   | 14   | RTS_R4_-_112 |
| TSS-REV-164 | REV | 478512 | 50   | 50   | 50   | RTS_R4_-_113 |
| TSS-REV-165 | REV | 480019 | 69   | 72   | 75   | RTS_R4_-_115 |
| TSS-REV-166 | REV | 484888 | 111  | 111  | 111  | RTS_R4_-_116 |
| TSS-REV-167 | REV | 484914 | 84   | 84   | 84   | RTS_R4_-_116 |
| TSS-REV-168 | REV | 484922 | 76   | 77   | 77   | RTS_R4_-_116 |
| TSS-REV-169 | REV | 484959 | 103  | 104  | 104  | RTS_R4_-_116 |
| TSS-REV-170 | REV | 485310 | 45   | 46   | 49   | RTS_R4_-_117 |
| TSS-REV-171 | REV | 490112 | 13   | 13   | 13   | RTS_R4_-_118 |

|             |     |        |        |        |        |              |
|-------------|-----|--------|--------|--------|--------|--------------|
| TSS-REV-172 | REV | 490663 | 6      | 6      | 6      | RTS_R4_-_119 |
| TSS-REV-173 | REV | 502520 | 10     | 10     | 10     | RTS_R4_-_121 |
| TSS-REV-174 | REV | 502564 | 10     | 10     | 10     | RTS_R4_-_121 |
| TSS-REV-175 | REV | 503954 | 2      | 2      | 2      | RTS_R4_-_122 |
| TSS-REV-176 | REV | 504035 | 2      | 2      | 2      | RTS_R4_-_122 |
| TSS-REV-177 | REV | 504044 | 3      | 3      | 3      | RTS_R4_-_122 |
| TSS-REV-178 | REV | 506369 | 46     | 46     | 46     | RTS_R4_-_123 |
| TSS-REV-179 | REV | 506441 | 49     | 49     | 49     | RTS_R4_-_123 |
| TSS-REV-180 | REV | 506463 | 57     | 57     | 57     | RTS_R4_-_123 |
| TSS-REV-181 | REV | 507321 | 12     | 15     | 20     | RTS_R4_-_124 |
| TSS-REV-182 | REV | 510619 | 53     | 53     | 54     | RTS_R4_-_125 |
| TSS-REV-183 | REV | 510635 | 2737   | 2746   | 2761   | RTS_R4_-_125 |
| TSS-REV-184 | REV | 515049 | 223    | 243    | 261    | RTS_R4_-_126 |
| TSS-REV-185 | REV | 517529 | 677    | 708    | 708    | RTS_R4_-_127 |
| TSS-REV-186 | REV | 517578 | 172    | 172    | 172    | RTS_R4_-_127 |
| TSS-REV-187 | REV | 517583 | 148    | 148    | 148    | RTS_R4_-_127 |
| TSS-REV-188 | REV | 519021 | 13     | 13     | 13     | RTS_R4_-_128 |
| TSS-REV-189 | REV | 519157 | 11     | 11     | 11     | RTS_R4_-_128 |
| TSS-REV-190 | REV | 530470 | 69     | 70     | 70     | RTS_R4_-_129 |
| TSS-REV-191 | REV | 530477 | 163    | 164    | 164    | RTS_R4_-_129 |
| TSS-REV-192 | REV | 552365 | 563    | 563    | 563    | RTS_R4_-_131 |
| TSS-REV-193 | REV | 553683 | 619    | 619    | 619    | RTS_R4_-_132 |
| TSS-REV-194 | REV | 553687 | 306    | 306    | 306    | RTS_R4_-_132 |
| TSS-REV-195 | REV | 553713 | 6091   | 6096   | 6099   | RTS_R4_-_132 |
| TSS-REV-196 | REV | 553728 | 55     | 55     | 57     | RTS_R4_-_132 |
| TSS-REV-197 | REV | 553781 | 910    | 911    | 919    | RTS_R4_-_132 |
| TSS-REV-198 | REV | 555697 |        |        | 1      | RTS_R4_-_133 |
| TSS-REV-199 | REV | 556998 | 73     | 73     | 73     | RTS_R4_-_134 |
| TSS-REV-200 | REV | 557004 | 56     | 57     | 58     | RTS_R4_-_134 |
| TSS-REV-201 | REV | 567403 | 1      | 1      | 1      | RTS_R4_-_136 |
| TSS-REV-202 | REV | 576080 | 50     | 51     | 51     | RTS_R4_-_138 |
| TSS-REV-203 | REV | 576093 | 73     | 80     | 84     | RTS_R4_-_138 |
| TSS-REV-204 | REV | 578131 | 470    | 470    | 470    | RTS_R4_-_139 |
| TSS-REV-205 | REV | 578144 | 1355   | 1355   | 1355   | RTS_R4_-_139 |
| TSS-REV-206 | REV | 580786 |        |        | 1      | RTS_R4_-_141 |
| TSS-REV-207 | REV | 582167 | 2      | 2      | 2      |              |
| TSS-REV-208 | REV | 584873 | 1147   | 1175   | 1176   | RTS_R4_-_142 |
| TSS-REV-209 | REV | 584881 | 1080   | 1087   | 1087   | RTS_R4_-_142 |
| TSS-REV-210 | REV | 584887 | 115948 | 116712 | 116732 | RTS_R4_-_142 |
| TSS-REV-211 | REV | 590318 | 4      | 4      | 4      | RTS_R4_-_144 |
| TSS-REV-212 | REV | 590483 | 5      | 5      | 5      | RTS_R4_-_144 |
| TSS-REV-213 | REV | 592554 | 5      | 5      | 5      | RTS_R4_-_145 |
| TSS-REV-214 | REV | 592574 | 8      | 8      | 8      | RTS_R4_-_145 |
| TSS-REV-215 | REV | 594681 | 2      | 2      | 2      | RTS_R4_-_146 |
| TSS-REV-216 | REV | 596419 | 2      | 2      | 2      | RTS_R4_-_147 |
| TSS-REV-217 | REV | 603879 | 5      | 5      | 5      | RTS_R4_-_148 |
| TSS-REV-218 | REV | 604668 | 655    | 655    | 655    | RTS_R4_-_149 |
| TSS-REV-219 | REV | 604676 | 72     | 72     | 72     | RTS_R4_-_149 |
| TSS-REV-220 | REV | 605447 | 31     | 31     | 31     | RTS_R4_-_150 |
| TSS-REV-221 | REV | 606485 | 5      | 5      | 21     | RTS_R4_-_151 |
| TSS-REV-222 | REV | 607015 | 1      | 1      | 2      | RTS_R4_-_152 |
| TSS-REV-223 | REV | 611838 | 10     | 10     | 10     | RTS_R4_-_153 |
| TSS-REV-224 | REV | 621457 | 255    | 255    | 271    | RTS_R4_-_154 |
| TSS-REV-225 | REV | 623950 | 80     | 80     | 80     | RTS_R4_-_155 |
| TSS-REV-226 | REV | 631486 | 3      | 3      | 3      | RTS_R4_-_156 |
| TSS-REV-227 | REV | 632746 | 224    | 231    | 232    | RTS_R4_-_157 |
| TSS-REV-228 | REV | 637825 | 19     | 19     | 19     | RTS_R4_-_158 |
| TSS-REV-229 | REV | 641120 | 71     | 93     | 124    | RTS_R4_-_159 |
| TSS-REV-230 | REV | 641126 | 81     | 97     | 131    | RTS_R4_-_159 |
| TSS-REV-231 | REV | 643277 | 435    | 436    | 436    | RTS_R4_-_160 |
| TSS-REV-232 | REV | 643288 | 29     | 29     | 29     | RTS_R4_-_160 |
| TSS-REV-233 | REV | 643364 | 31     | 31     | 34     | RTS_R4_-_160 |
| TSS-REV-234 | REV | 644257 | 122    | 123    | 124    | RTS_R4_-_161 |



|             |     |        |      |      |      |              |
|-------------|-----|--------|------|------|------|--------------|
| TSS-REV-235 | REV | 657190 | 6    | 6    | 8    | RTS_R4_-_163 |
| TSS-REV-236 | REV | 659474 | 75   | 80   | 80   | RTS_R4_-_164 |
| TSS-REV-237 | REV | 659525 | 12   | 13   | 13   | RTS_R4_-_164 |
| TSS-REV-238 | REV | 661533 | 19   | 19   | 19   | RTS_R4_-_165 |
| TSS-REV-239 | REV | 661929 | 63   | 290  | 316  | RTS_R4_-_166 |
| TSS-REV-240 | REV | 663224 | 222  | 224  | 224  | RTS_R4_-_167 |
| TSS-REV-241 | REV | 663372 | 182  | 182  | 182  | RTS_R4_-_167 |
| TSS-REV-242 | REV | 664555 | 60   | 60   | 60   | RTS_R4_-_168 |
| TSS-REV-243 | REV | 664684 | 132  | 132  | 132  | RTS_R4_-_168 |
| TSS-REV-244 | REV | 668291 | 53   | 54   | 54   | RTS_R4_-_169 |
| TSS-REV-245 | REV | 668296 | 40   | 40   | 41   | RTS_R4_-_169 |
| TSS-REV-246 | REV | 668430 | 46   | 46   | 46   | RTS_R4_-_169 |
| TSS-REV-247 | REV | 670132 | 40   | 40   | 40   | RTS_R4_-_170 |
| TSS-REV-248 | REV | 674060 | 72   | 72   | 72   | RTS_R4_-_171 |
| TSS-REV-249 | REV | 674068 | 1008 | 1020 | 1022 | RTS_R4_-_171 |
| TSS-REV-250 | REV | 675831 | 3    | 3    | 3    | RTS_R4_-_172 |
| TSS-REV-251 | REV | 683662 | 205  | 205  | 205  | RTS_R4_-_174 |
| TSS-REV-252 | REV | 686066 | 130  | 145  | 291  | RTS_R4_-_175 |
| TSS-REV-253 | REV | 686081 | 100  | 117  | 286  | RTS_R4_-_175 |
| TSS-REV-254 | REV | 687035 | 256  | 256  | 256  | RTS_R4_-_176 |
| TSS-REV-255 | REV | 687066 | 70   | 70   | 71   | RTS_R4_-_176 |
| TSS-REV-256 | REV | 687077 | 50   | 50   | 50   | RTS_R4_-_176 |
| TSS-REV-257 | REV | 688559 | 3    | 3    | 3    | RTS_R4_-_177 |
| TSS-REV-258 | REV | 691100 | 587  | 595  | 599  | RTS_R4_-_178 |
| TSS-REV-259 | REV | 692652 | 217  | 217  | 223  | RTS_R4_-_179 |
| TSS-REV-260 | REV | 692659 | 178  | 188  | 188  | RTS_R4_-_179 |
| TSS-REV-261 | REV | 692692 | 349  | 352  | 354  | RTS_R4_-_179 |
| TSS-REV-262 | REV | 694214 | 44   | 45   | 45   | RTS_R4_-_180 |
| TSS-REV-263 | REV | 696016 | 892  | 1072 | 1526 | RTS_R4_-_181 |
| TSS-REV-264 | REV | 696389 | 8    | 8    | 8    | RTS_R4_-_182 |
| TSS-REV-265 | REV | 698445 | 557  | 558  | 558  | RTS_R4_-_183 |
| TSS-REV-266 | REV | 699578 | 41   | 41   | 41   | RTS_R4_-_184 |
| TSS-REV-267 | REV | 700877 | 129  | 130  | 132  | RTS_R4_-_185 |
| TSS-REV-268 | REV | 701088 | 40   | 41   | 42   | RTS_R4_-_185 |
| TSS-REV-269 | REV | 702929 | 116  | 116  | 119  | RTS_R4_-_186 |
| TSS-REV-270 | REV | 709939 | 1620 | 1626 | 1628 | RTS_R4_-_187 |
| TSS-REV-271 | REV | 709945 | 187  | 187  | 190  | RTS_R4_-_187 |
| TSS-REV-272 | REV | 709975 | 95   | 95   | 95   | RTS_R4_-_187 |
| TSS-REV-273 | REV | 710003 | 87   | 87   | 87   | RTS_R4_-_187 |
| TSS-REV-274 | REV | 710051 | 320  | 320  | 320  | RTS_R4_-_187 |
| TSS-REV-275 | REV | 710719 | 382  | 382  | 382  | RTS_R4_-_188 |
| TSS-REV-276 | REV | 710744 | 477  | 479  | 479  | RTS_R4_-_188 |
| TSS-REV-277 | REV | 710819 | 215  | 215  | 215  | RTS_R4_-_188 |
| TSS-REV-278 | REV | 712066 | 60   | 60   | 60   | RTS_R4_-_189 |
| TSS-REV-279 | REV | 717567 | 7    | 8    | 10   | RTS_R4_-_190 |
| TSS-REV-280 | REV | 721191 | 13   | 13   | 13   | RTS_R4_-_191 |
| TSS-REV-281 | REV | 721208 | 21   | 21   | 21   | RTS_R4_-_191 |
| TSS-REV-282 | REV | 741892 | 43   | 44   | 44   | RTS_R4_-_193 |
| TSS-REV-283 | REV | 747026 | 39   | 40   | 40   | RTS_R4_-_194 |
| TSS-REV-284 | REV | 752400 | 17   | 17   | 18   | RTS_R4_-_195 |
| TSS-REV-285 | REV | 752404 | 15   | 15   | 20   | RTS_R4_-_195 |
| TSS-REV-286 | REV | 753894 | 988  | 989  | 993  | RTS_R4_-_196 |
| TSS-REV-287 | REV | 753897 | 233  | 233  | 233  | RTS_R4_-_196 |
| TSS-REV-288 | REV | 753901 | 2223 | 2225 | 2233 | RTS_R4_-_196 |
| TSS-REV-289 | REV | 753904 | 646  | 647  | 647  | RTS_R4_-_196 |
| TSS-REV-290 | REV | 753919 | 146  | 146  | 147  | RTS_R4_-_196 |
| TSS-REV-291 | REV | 753923 | 133  | 133  | 133  | RTS_R4_-_196 |
| TSS-REV-292 | REV | 753995 | 395  | 395  | 404  | RTS_R4_-_196 |
| TSS-REV-293 | REV | 754018 | 2556 | 2556 | 2560 | RTS_R4_-_196 |
| TSS-REV-294 | REV | 765122 | 39   | 44   | 44   | RTS_R4_-_197 |
| TSS-REV-295 | REV | 784070 | 29   | 29   | 32   | RTS_R4_-_198 |
| TSS-REV-296 | REV | 784607 | 114  | 114  | 115  | RTS_R4_-_199 |
| TSS-REV-297 | REV | 784663 | 30   | 30   | 30   | RTS_R4_-_199 |

|             |     |        |       |       |       |              |
|-------------|-----|--------|-------|-------|-------|--------------|
| TSS-REV-298 | REV | 784685 | 23    | 23    | 23    | RTS_R4_-_199 |
| TSS-REV-299 | REV | 786855 | 3472  | 3489  | 3515  | RTS_R4_-_200 |
| TSS-REV-300 | REV | 786893 | 4117  | 4161  | 4195  | RTS_R4_-_200 |
| TSS-REV-301 | REV | 786905 | 305   | 314   | 315   | RTS_R4_-_200 |
| TSS-REV-302 | REV | 788097 | 217   | 217   | 217   | RTS_R4_-_201 |
| TSS-REV-303 | REV | 788124 | 53    | 53    | 53    | RTS_R4_-_201 |
| TSS-REV-304 | REV | 791309 | 93    | 93    | 93    | RTS_R4_-_202 |
| TSS-REV-305 | REV | 793037 | 59    | 60    | 60    | RTS_R4_-_203 |
| TSS-REV-306 | REV | 793885 | 1     | 2     | 2     | RTS_R4_-_204 |
| TSS-REV-307 | REV | 797681 | 86    | 86    | 86    | RTS_R4_-_205 |
| TSS-REV-308 | REV | 806537 | 50    | 50    | 50    | RTS_R4_-_207 |
| TSS-REV-309 | REV | 806546 | 601   | 601   | 602   | RTS_R4_-_207 |
| TSS-REV-310 | REV | 807152 | 366   | 366   | 366   | RTS_R4_-_208 |
| TSS-REV-311 | REV | 808513 | 201   | 202   | 202   | RTS_R4_-_209 |
| TSS-REV-312 | REV | 815894 | 28    | 28    | 28    | RTS_R4_-_210 |
| TSS-REV-313 | REV | 823747 | 36    | 36    | 38    | RTS_R4_-_211 |
| TSS-REV-314 | REV | 828189 | 3     | 3     | 3     | RTS_R4_-_212 |
| TSS-REV-315 | REV | 828206 | 3     | 3     | 3     | RTS_R4_-_212 |
| TSS-REV-316 | REV | 829893 | 71    | 76    | 79    | RTS_R4_-_213 |
| TSS-REV-317 | REV | 837198 | 92    | 92    | 92    | RTS_R4_-_215 |
| TSS-REV-318 | REV | 837699 | 1     | 1     | 20    | RTS_R4_-_216 |
| TSS-REV-319 | REV | 837705 | 8     | 8     | 15    | RTS_R4_-_216 |
| TSS-REV-320 | REV | 839139 | 2     | 2     | 2     | RTS_R4_-_217 |
| TSS-REV-321 | REV | 844733 | 13    | 13    | 14    | RTS_R4_-_220 |
| TSS-REV-322 | REV | 847270 | 13    | 15    | 15    | RTS_R4_-_221 |
| TSS-REV-323 | REV | 847360 | 10    | 10    | 11    | RTS_R4_-_221 |
| TSS-REV-324 | REV | 848160 | 1387  | 1392  | 1549  | RTS_R4_-_222 |
| TSS-REV-325 | REV | 848167 | 2941  | 2990  | 5281  | RTS_R4_-_222 |
| TSS-REV-326 | REV | 848173 | 11048 | 11174 | 13391 | RTS_R4_-_222 |
| TSS-REV-327 | REV | 849354 | 17    | 17    | 17    | RTS_R4_-_223 |
| TSS-REV-328 | REV | 852270 | 817   | 861   | 1953  | RTS_R4_-_225 |
| TSS-REV-329 | REV | 855021 | 94    | 94    | 94    | RTS_R4_-_226 |
| TSS-REV-330 | REV | 859272 | 11    | 11    | 11    | RTS_R4_-_227 |
| TSS-REV-331 | REV | 865611 | 46    | 50    | 51    | RTS_R4_-_228 |
| TSS-REV-332 | REV | 877292 | 105   | 105   | 105   | RTS_R4_-_229 |
| TSS-REV-333 | REV | 879742 | 289   | 306   | 307   | RTS_R4_-_230 |
| TSS-REV-334 | REV | 882682 | 8     | 8     | 8     | RTS_R4_-_231 |
| TSS-REV-335 | REV | 886577 | 6     | 6     | 6     | RTS_R4_-_232 |
| TSS-REV-336 | REV | 887280 | 9     | 32    | 638   | RTS_R4_-_233 |
| TSS-REV-337 | REV | 889168 | 64    | 64    | 64    | RTS_R4_-_234 |
| TSS-REV-338 | REV | 889999 | 68    | 68    | 68    | RTS_R4_-_235 |
| TSS-REV-339 | REV | 890020 | 103   | 104   | 105   | RTS_R4_-_235 |
| TSS-REV-340 | REV | 899820 | 187   | 196   | 196   | RTS_R4_-_236 |
| TSS-REV-341 | REV | 899828 | 146   | 158   | 158   | RTS_R4_-_236 |
| TSS-REV-342 | REV | 899849 | 583   | 619   | 619   | RTS_R4_-_236 |
| TSS-REV-343 | REV | 902993 | 147   | 150   | 150   | RTS_R4_-_237 |
| TSS-REV-344 | REV | 903066 | 60    | 60    | 61    | RTS_R4_-_237 |
| TSS-REV-345 | REV | 903736 | 70    | 71    | 100   | RTS_R4_-_238 |
| TSS-REV-346 | REV | 906078 | 28    | 29    | 29    | RTS_R4_-_239 |
| TSS-REV-347 | REV | 908543 | 167   | 169   | 169   | RTS_R4_-_240 |
| TSS-REV-348 | REV | 910299 | 50    | 53    | 69    | RTS_R4_-_241 |
| TSS-REV-349 | REV | 911723 | 10    | 10    | 10    | RTS_R4_-_242 |
| TSS-REV-350 | REV | 913299 | 28    | 28    | 31    |              |
| TSS-REV-351 | REV | 914076 | 40    | 40    | 40    | RTS_R4_-_243 |
| TSS-REV-352 | REV | 914507 | 41    | 45    | 46    | RTS_R4_-_244 |
| TSS-REV-353 | REV | 914515 | 35    | 35    | 35    | RTS_R4_-_244 |
| TSS-REV-354 | REV | 915454 | 44    | 44    | 52    | RTS_R4_-_245 |
| TSS-REV-355 | REV | 918326 | 309   | 395   | 396   | RTS_R4_-_246 |
| TSS-REV-356 | REV | 921858 | 22    | 23    | 433   | RTS_R4_-_247 |
| TSS-REV-357 | REV | 921899 | 129   | 139   | 498   | RTS_R4_-_247 |
| TSS-REV-358 | REV | 925194 | 161   | 163   | 163   | RTS_R4_-_248 |
| TSS-REV-359 | REV | 925671 | 118   | 119   | 119   | RTS_R4_-_249 |
| TSS-REV-360 | REV | 925694 | 119   | 120   | 120   | RTS_R4_-_249 |

|             |     |         |       |       |       |              |
|-------------|-----|---------|-------|-------|-------|--------------|
| TSS-REV-361 | REV | 925701  | 2024  | 2026  | 2026  | RTS_R4_-_249 |
| TSS-REV-362 | REV | 925730  | 671   | 672   | 672   | RTS_R4_-_249 |
| TSS-REV-363 | REV | 930221  | 70    | 70    | 70    | RTS_R4_-_251 |
| TSS-REV-364 | REV | 931301  | 411   | 415   | 415   | RTS_R4_-_252 |
| TSS-REV-365 | REV | 944837  | 21    | 21    | 21    | RTS_R4_-_253 |
| TSS-REV-366 | REV | 948821  | 27    | 27    | 27    | RTS_R4_-_254 |
| TSS-REV-367 | REV | 950378  | 159   | 170   | 170   | RTS_R4_-_255 |
| TSS-REV-368 | REV | 952802  | 292   | 293   | 294   | RTS_R4_-_256 |
| TSS-REV-369 | REV | 952864  | 348   | 349   | 352   | RTS_R4_-_256 |
| TSS-REV-370 | REV | 952967  | 853   | 856   | 861   | RTS_R4_-_256 |
| TSS-REV-371 | REV | 953715  |       | 12    | 12    | RTS_R4_-_257 |
| TSS-REV-372 | REV | 953726  | 9     | 9     | 12    | RTS_R4_-_257 |
| TSS-REV-373 | REV | 955881  | 62    | 62    | 62    | RTS_R4_-_258 |
| TSS-REV-374 | REV | 959396  | 4     | 4     | 4     | RTS_R4_-_259 |
| TSS-REV-375 | REV | 972639  | 4     | 4     | 5     | RTS_R4_-_260 |
| TSS-REV-376 | REV | 984958  | 247   | 249   | 249   | RTS_R4_-_261 |
| TSS-REV-377 | REV | 984967  | 421   | 425   | 427   | RTS_R4_-_261 |
| TSS-REV-378 | REV | 986315  | 36611 | 36649 | 36661 | RTS_R4_-_262 |
| TSS-REV-379 | REV | 988228  | 52    | 52    | 52    | RTS_R4_-_263 |
| TSS-REV-380 | REV | 988242  | 56    | 56    | 57    | RTS_R4_-_263 |
| TSS-REV-381 | REV | 988267  | 101   | 101   | 102   | RTS_R4_-_263 |
| TSS-REV-382 | REV | 989638  | 32    | 32    | 32    | RTS_R4_-_264 |
| TSS-REV-383 | REV | 996785  | 8     | 8     | 8     | RTS_R4_-_265 |
| TSS-REV-384 | REV | 1003714 | 7     | 7     | 7     | RTS_R4_-_266 |
| TSS-REV-385 | REV | 1006847 | 6     | 6     | 6     | RTS_R4_-_267 |
| TSS-REV-386 | REV | 1015720 | 505   | 512   | 514   | RTS_R4_-_268 |
| TSS-REV-387 | REV | 1017551 | 139   | 140   | 140   | RTS_R4_-_269 |
| TSS-REV-388 | REV | 1019302 | 1408  | 1423  | 1423  | RTS_R4_-_270 |
| TSS-REV-389 | REV | 1019341 | 1018  | 1033  | 1035  | RTS_R4_-_270 |
| TSS-REV-390 | REV | 1019418 | 34    | 34    | 34    | RTS_R4_-_270 |
| TSS-REV-391 | REV | 1020172 | 39    | 45    | 46    | RTS_R4_-_271 |
| TSS-REV-392 | REV | 1023560 | 15    | 15    | 15    | RTS_R4_-_272 |
| TSS-REV-393 | REV | 1023602 | 17    | 17    | 17    | RTS_R4_-_272 |
| TSS-REV-394 | REV | 1026264 | 149   | 173   | 181   | RTS_R4_-_273 |
| TSS-REV-395 | REV | 1027059 | 22    | 22    | 23    | RTS_R4_-_274 |
| TSS-REV-396 | REV | 1027961 | 95    | 388   | 418   | RTS_R4_-_275 |
| TSS-REV-397 | REV | 1027966 | 29    | 88    | 94    | RTS_R4_-_275 |
| TSS-REV-398 | REV | 1029221 | 74    | 74    | 74    | RTS_R4_-_276 |
| TSS-REV-399 | REV | 1029908 | 65    | 66    | 66    | RTS_R4_-_277 |
| TSS-REV-400 | REV | 1029915 | 177   | 178   | 178   | RTS_R4_-_277 |
| TSS-REV-401 | REV | 1030669 | 2887  | 2906  | 2907  | RTS_R4_-_278 |
| TSS-REV-402 | REV | 1030673 | 2915  | 3100  | 3107  | RTS_R4_-_278 |
| TSS-REV-403 | REV | 1030935 | 326   | 339   | 362   | RTS_R4_-_279 |
| TSS-REV-404 | REV | 1031352 | 1     | 1     | 1     | RTS_R4_-_280 |
| TSS-REV-405 | REV | 1041752 | 24    | 24    | 24    | RTS_R4_-_281 |
| TSS-REV-406 | REV | 1049923 | 241   | 241   | 241   | RTS_R4_-_283 |
| TSS-REV-407 | REV | 1057207 | 110   | 118   | 120   | RTS_R4_-_284 |
| TSS-REV-408 | REV | 1063026 | 176   | 176   | 179   | RTS_R4_-_285 |
| TSS-REV-409 | REV | 1063051 | 279   | 280   | 282   | RTS_R4_-_285 |
| TSS-REV-410 | REV | 1063056 | 189   | 189   | 189   | RTS_R4_-_285 |
| TSS-REV-411 | REV | 1066953 | 39    | 51    | 69    | RTS_R4_-_286 |
| TSS-REV-412 | REV | 1066959 | 44    | 52    | 53    | RTS_R4_-_286 |
| TSS-REV-413 | REV | 1066981 | 1779  | 1900  | 2025  | RTS_R4_-_286 |
| TSS-REV-414 | REV | 1068877 |       |       | 1     | RTS_R4_-_287 |
| TSS-REV-415 | REV | 1073288 | 4     | 4     | 4     | RTS_R4_-_288 |
| TSS-REV-416 | REV | 1078129 | 11    | 11    | 11    | RTS_R4_-_289 |
| TSS-REV-417 | REV | 1078136 | 11    | 11    | 11    | RTS_R4_-_289 |
| TSS-REV-418 | REV | 1078145 | 13    | 14    | 15    | RTS_R4_-_289 |
| TSS-REV-419 | REV | 1080499 | 12    | 12    | 13    | RTS_R4_-_290 |
| TSS-REV-420 | REV | 1084079 | 7     | 7     | 7     | RTS_R4_-_291 |
| TSS-REV-421 | REV | 1085851 | 8     | 9     | 9     | RTS_R4_-_292 |
| TSS-REV-422 | REV | 1096875 | 48    | 48    | 48    | RTS_R4_-_294 |
| TSS-REV-423 | REV | 1102550 | 55    | 56    | 62    | RTS_R4_-_295 |

|             |     |         |     |     |     |              |
|-------------|-----|---------|-----|-----|-----|--------------|
| TSS-REV-424 | REV | 1102566 | 57  | 61  | 64  | RTS_R4_-_295 |
| TSS-REV-425 | REV | 1108345 | 32  | 32  | 32  | RTS_R4_-_296 |
| TSS-REV-426 | REV | 1113435 | 738 | 741 | 771 | RTS_R4_-_297 |
| TSS-REV-427 | REV | 1114756 | 2   | 2   | 2   | RTS_R4_-_298 |
| TSS-REV-428 | REV | 1115838 | 23  | 28  | 28  | RTS_R4_-_299 |
| TSS-REV-429 | REV | 1117768 | 69  | 69  | 69  | RTS_R4_-_300 |
| TSS-REV-430 | REV | 1117897 | 74  | 74  | 74  | RTS_R4_-_300 |
| TSS-REV-431 | REV | 1118294 | 1   | 1   | 1   | RTS_R4_-_300 |
| TSS-REV-432 | REV | 1119832 | 93  | 93  | 93  | RTS_R4_-_301 |
| TSS-REV-433 | REV | 1120252 |     | 109 | 111 | RTS_R4_-_302 |
| TSS-REV-434 | REV | 1120732 | 37  | 37  | 37  | RTS_R4_-_303 |
| TSS-REV-435 | REV | 1121857 | 60  | 60  | 60  | RTS_R4_-_304 |
| TSS-REV-436 | REV | 1121866 | 67  | 67  | 67  | RTS_R4_-_304 |
| TSS-REV-437 | REV | 1123304 | 313 | 314 | 316 | RTS_R4_-_305 |
| TSS-REV-438 | REV | 1129388 | 34  | 34  | 34  | RTS_R4_-_306 |
| TSS-REV-439 | REV | 1143581 | 102 | 102 | 103 | RTS_R4_-_307 |
| TSS-REV-440 | REV | 1143607 | 86  | 86  | 86  | RTS_R4_-_307 |
| TSS-REV-441 | REV | 1143903 | 469 | 470 | 472 | RTS_R4_-_307 |
| TSS-REV-442 | REV | 1144100 | 21  | 21  | 21  | RTS_R4_-_307 |
| TSS-REV-443 | REV | 1145848 | 119 | 120 | 121 | RTS_R4_-_308 |
| TSS-REV-444 | REV | 1160838 | 9   | 9   | 9   | RTS_R4_-_310 |
| TSS-REV-445 | REV | 1168006 | 13  | 13  | 13  | RTS_R4_-_311 |
| TSS-REV-446 | REV | 1169641 | 43  | 43  | 43  | RTS_R4_-_312 |
| TSS-REV-447 | REV | 1173215 | 56  | 69  | 71  | RTS_R4_-_313 |
| TSS-REV-448 | REV | 1173251 | 277 | 277 | 279 | RTS_R4_-_313 |
| TSS-REV-449 | REV | 1184883 | 124 | 124 | 124 | RTS_R4_-_314 |
| TSS-REV-450 | REV | 1187488 | 454 | 469 | 495 | RTS_R4_-_315 |
| TSS-REV-451 | REV | 1189695 | 63  | 64  | 64  | RTS_R4_-_316 |
| TSS-REV-452 | REV | 1189706 | 46  | 48  | 48  | RTS_R4_-_316 |
| TSS-REV-453 | REV | 1189714 | 22  | 31  | 31  | RTS_R4_-_316 |
| TSS-REV-454 | REV | 1193024 | 102 | 103 | 103 | RTS_R4_-_317 |
| TSS-REV-455 | REV | 1194167 | 28  | 28  | 28  | RTS_R4_-_318 |
| TSS-REV-456 | REV | 1196783 | 23  | 23  | 23  |              |
| TSS-REV-457 | REV | 1197501 | 48  | 48  | 48  |              |
| TSS-REV-458 | REV | 1200268 | 7   | 7   | 7   | RTS_R4_-_319 |
| TSS-REV-459 | REV | 1200279 | 6   | 6   | 6   | RTS_R4_-_319 |
| TSS-REV-460 | REV | 1200715 | 30  | 39  | 52  | RTS_R4_-_320 |
| TSS-REV-461 | REV | 1202147 | 95  | 96  | 97  | RTS_R4_-_321 |
| TSS-REV-462 | REV | 1202156 | 122 | 124 | 125 | RTS_R4_-_321 |
| TSS-REV-463 | REV | 1202433 | 54  | 54  | 66  | RTS_R4_-_322 |
| TSS-REV-464 | REV | 1203044 | 3   | 34  | 53  | RTS_R4_-_323 |
| TSS-REV-465 | REV | 1208076 | 3   | 3   | 3   | RTS_R4_-_324 |
| TSS-REV-466 | REV | 1212359 | 11  | 11  | 11  |              |
| TSS-REV-467 | REV | 1213336 | 69  | 73  | 73  | RTS_R4_-_325 |
| TSS-REV-468 | REV | 1214729 | 2   | 2   | 2   | RTS_R4_-_326 |
| TSS-REV-469 | REV | 1222320 | 161 | 161 | 161 | RTS_R4_-_327 |
| TSS-REV-470 | REV | 1225362 | 440 | 443 | 443 | RTS_R4_-_328 |
| TSS-REV-471 | REV | 1225656 | 14  | 14  | 14  | RTS_R4_-_329 |
| TSS-REV-472 | REV | 1226729 | 96  | 106 | 166 | RTS_R4_-_330 |
| TSS-REV-473 | REV | 1229673 | 3   | 3   | 3   | RTS_R4_-_331 |
| TSS-REV-474 | REV | 1232278 | 60  | 60  | 60  | RTS_R4_-_332 |
| TSS-REV-475 | REV | 1233988 | 68  | 68  | 68  | RTS_R4_-_333 |
| TSS-REV-476 | REV | 1236509 | 1   | 1   | 1   | RTS_R4_-_334 |
| TSS-REV-477 | REV | 1242327 | 67  | 67  | 67  | RTS_R4_-_335 |
| TSS-REV-478 | REV | 1243778 | 15  | 15  | 15  | RTS_R4_-_336 |
| TSS-REV-479 | REV | 1246645 | 33  | 33  | 34  | RTS_R4_-_337 |
| TSS-REV-480 | REV | 1250020 | 2   | 3   | 3   | RTS_R4_-_338 |
| TSS-REV-481 | REV | 1250041 | 4   | 4   | 4   | RTS_R4_-_338 |
| TSS-REV-482 | REV | 1255468 | 8   | 8   | 8   | RTS_R4_-_339 |
| TSS-REV-483 | REV | 1255538 | 7   | 7   | 7   | RTS_R4_-_339 |
| TSS-REV-484 | REV | 1257105 | 566 | 568 | 570 | RTS_R4_-_340 |
| TSS-REV-485 | REV | 1257765 | 139 | 141 | 141 | RTS_R4_-_341 |
| TSS-REV-486 | REV | 1260092 | 9   | 9   | 9   | RTS_R4_-_342 |

|             |     |         |      |      |      |              |
|-------------|-----|---------|------|------|------|--------------|
| TSS-REV-487 | REV | 1261082 | 132  | 132  | 132  | RTS_R4_-_343 |
| TSS-REV-488 | REV | 1262758 | 576  | 584  | 588  | RTS_R4_-_344 |
| TSS-REV-489 | REV | 1268557 |      | 4    | 5    | RTS_R4_-_345 |
| TSS-REV-490 | REV | 1271119 | 67   | 70   | 70   | RTS_R4_-_351 |
| TSS-REV-491 | REV | 1272855 | 436  | 438  | 438  | RTS_R4_-_352 |
| TSS-REV-492 | REV | 1277086 | 32   | 32   | 32   | RTS_R4_-_353 |
| TSS-REV-493 | REV | 1286462 | 5    | 6    | 6    | RTS_R4_-_354 |
| TSS-REV-494 | REV | 1286758 | 1515 | 1515 | 1515 | RTS_R4_-_355 |
| TSS-REV-495 | REV | 1288373 | 76   | 76   | 76   | RTS_R4_-_356 |
| TSS-REV-496 | REV | 1288400 | 107  | 109  | 109  | RTS_R4_-_356 |
| TSS-REV-497 | REV | 1289388 | 17   | 17   | 17   | RTS_R4_-_357 |
| TSS-REV-498 | REV | 1292153 | 35   | 97   | 113  | RTS_R4_-_358 |
| TSS-REV-499 | REV | 1292181 | 1186 | 1606 | 1704 | RTS_R4_-_358 |
| TSS-REV-500 | REV | 1297361 | 257  | 268  | 276  | RTS_R4_-_359 |
| TSS-REV-501 | REV | 1297367 | 851  | 866  | 874  | RTS_R4_-_359 |
| TSS-REV-502 | REV | 1297374 | 3426 | 3441 | 3446 | RTS_R4_-_359 |
| TSS-REV-503 | REV | 1297392 | 110  | 110  | 111  | RTS_R4_-_359 |
| TSS-REV-504 | REV | 1297440 | 67   | 67   | 67   | RTS_R4_-_359 |
| TSS-REV-505 | REV | 1297477 | 32   | 36   | 37   | RTS_R4_-_359 |
| TSS-REV-506 | REV | 1306680 | 34   | 34   | 34   | RTS_R4_-_360 |
| TSS-REV-507 | REV | 1306697 | 50   | 50   | 50   | RTS_R4_-_360 |
| TSS-REV-508 | REV | 1308374 | 5    | 5    | 5    | RTS_R4_-_361 |
| TSS-REV-509 | REV | 1308579 | 3    | 3    | 3    | RTS_R4_-_361 |
| TSS-REV-510 | REV | 1308916 | 1041 | 1047 | 1048 | RTS_R4_-_362 |
| TSS-REV-511 | REV | 1310298 | 65   | 65   | 65   | RTS_R4_-_363 |
| TSS-REV-512 | REV | 1311720 | 53   | 53   | 53   | RTS_R4_-_364 |
| TSS-REV-513 | REV | 1314116 | 57   | 58   | 82   | RTS_R4_-_365 |
| TSS-REV-514 | REV | 1317986 | 7    | 7    | 7    | RTS_R4_-_366 |
| TSS-REV-515 | REV | 1318200 | 7    | 7    | 7    | RTS_R4_-_366 |
| TSS-REV-516 | REV | 1321132 | 479  | 479  | 479  | RTS_R4_-_367 |
| TSS-REV-517 | REV | 1327190 | 77   | 77   | 77   | RTS_R4_-_368 |
| TSS-REV-518 | REV | 1328711 | 58   | 61   | 64   | RTS_R4_-_369 |
| TSS-REV-519 | REV | 1328719 | 104  | 106  | 107  | RTS_R4_-_369 |
| TSS-REV-520 | REV | 1328738 | 246  | 246  | 246  | RTS_R4_-_369 |
| TSS-REV-521 | REV | 1337214 | 117  | 117  | 117  | RTS_R4_-_370 |
| TSS-REV-522 | REV | 1341392 | 84   | 90   | 122  | RTS_R4_-_371 |
| TSS-REV-523 | REV | 1341449 |      |      | 31   | RTS_R4_-_371 |
| TSS-REV-524 | REV | 1342411 | 117  | 117  | 117  | RTS_R4_-_372 |
| TSS-REV-525 | REV | 1342663 | 32   | 32   | 32   | RTS_R4_-_373 |
| TSS-REV-526 | REV | 1344866 | 30   | 30   | 32   | RTS_R4_-_374 |
| TSS-REV-527 | REV | 1346965 | 116  | 117  | 117  | RTS_R4_-_375 |
| TSS-REV-528 | REV | 1347152 | 23   | 23   | 23   | RTS_R4_-_375 |
| TSS-REV-529 | REV | 1349112 | 77   | 77   | 77   | RTS_R4_-_377 |
| TSS-REV-530 | REV | 1349118 | 44   | 44   | 44   | RTS_R4_-_377 |
| TSS-REV-531 | REV | 1349127 | 152  | 152  | 152  | RTS_R4_-_377 |
| TSS-REV-532 | REV | 1349144 | 86   | 88   | 94   | RTS_R4_-_377 |
| TSS-REV-533 | REV | 1354010 | 6    | 6    | 6    | RTS_R4_-_378 |
| TSS-REV-534 | REV | 1354061 | 8    | 8    | 10   | RTS_R4_-_378 |
| TSS-REV-535 | REV | 1354111 | 9    | 9    | 9    | RTS_R4_-_378 |
| TSS-REV-536 | REV | 1355205 | 4    | 4    | 4    | RTS_R4_-_379 |
| TSS-REV-537 | REV | 1355443 | 5    | 5    | 5    | RTS_R4_-_379 |
| TSS-REV-538 | REV | 1355723 | 56   | 56   | 56   | RTS_R4_-_380 |
| TSS-REV-539 | REV | 1358991 | 59   | 60   | 102  | RTS_R4_-_381 |
| TSS-REV-540 | REV | 1365969 | 16   | 16   | 16   | RTS_R4_-_382 |
| TSS-REV-541 | REV | 1382013 | 127  | 129  | 129  | RTS_R4_-_383 |
| TSS-REV-542 | REV | 1386860 | 199  | 201  | 201  | RTS_R4_-_384 |
| TSS-REV-543 | REV | 1386868 | 2041 | 2061 | 2078 | RTS_R4_-_384 |
| TSS-REV-544 | REV | 1388647 | 144  | 144  | 153  | RTS_R4_-_385 |
| TSS-REV-545 | REV | 1389911 | 4    | 4    | 4    | RTS_R4_-_386 |
| TSS-REV-546 | REV | 1389918 | 6    | 6    | 6    | RTS_R4_-_386 |
| TSS-REV-547 | REV | 1393949 | 4    | 4    | 4    | RTS_R4_-_387 |
| TSS-REV-548 | REV | 1396683 | 625  | 632  | 668  | RTS_R4_-_388 |
| TSS-REV-549 | REV | 1397563 | 76   | 76   | 82   | RTS_R4_-_389 |

|             |     |         |     |     |     |              |
|-------------|-----|---------|-----|-----|-----|--------------|
| TSS-REV-550 | REV | 1397576 | 91  | 92  | 98  | RTS_R4_-_389 |
| TSS-REV-551 | REV | 1398309 | 6   | 7   | 7   | RTS_R4_-_390 |
| TSS-REV-552 | REV | 1402613 | 4   | 4   | 4   | RTS_R4_-_391 |
| TSS-REV-553 | REV | 1402707 | 6   | 6   | 6   | RTS_R4_-_391 |
| TSS-REV-554 | REV | 1403829 | 1   | 7   | 13  | RTS_R4_-_392 |
| TSS-REV-555 | REV | 1405893 | 137 | 137 | 137 | RTS_R4_-_393 |
| TSS-REV-556 | REV | 1407453 | 3   | 3   | 5   | RTS_R4_-_394 |
| TSS-REV-557 | REV | 1410148 | 124 | 124 | 124 | RTS_R4_-_395 |
| TSS-REV-558 | REV | 1410184 | 208 | 208 | 208 | RTS_R4_-_395 |
| TSS-REV-559 | REV | 1415056 |     |     | 1   | RTS_R4_-_396 |
| TSS-REV-560 | REV | 1418265 | 121 | 122 | 124 | RTS_R4_-_397 |
| TSS-REV-561 | REV | 1421757 | 19  | 19  | 19  | RTS_R4_-_398 |
| TSS-REV-562 | REV | 1424997 |     |     | 8   | RTS_R4_-_399 |
| TSS-REV-563 | REV | 1426777 | 2   | 2   | 2   | RTS_R4_-_400 |
| TSS-REV-564 | REV | 1432557 | 8   | 8   | 8   | RTS_R4_-_401 |
| TSS-REV-565 | REV | 1433665 | 73  | 88  | 143 | RTS_R4_-_402 |
| TSS-REV-566 | REV | 1433735 | 52  | 52  | 52  | RTS_R4_-_402 |
| TSS-REV-567 | REV | 1438869 | 106 | 107 | 116 | RTS_R4_-_403 |
| TSS-REV-568 | REV | 1439801 | 19  | 23  | 55  | RTS_R4_-_404 |
| TSS-REV-569 | REV | 1440902 | 34  | 96  | 99  | RTS_R4_-_405 |
| TSS-REV-570 | REV | 1440913 | 67  | 183 | 184 | RTS_R4_-_405 |
| TSS-REV-571 | REV | 1440942 | 112 | 122 | 122 | RTS_R4_-_405 |
| TSS-REV-572 | REV | 1441359 | 4   | 4   | 4   | RTS_R4_-_406 |
| TSS-REV-573 | REV | 1445332 | 6   | 6   | 6   | RTS_R4_-_407 |
| TSS-REV-574 | REV | 1451735 | 18  | 18  | 18  | RTS_R4_-_408 |
| TSS-REV-575 | REV | 1480928 | 196 | 196 | 196 | RTS_R4_-_410 |
| TSS-REV-576 | REV | 1488776 | 113 | 115 | 115 | RTS_R4_-_411 |
| TSS-REV-577 | REV | 1489529 | 7   | 13  | 42  |              |
| TSS-REV-578 | REV | 1490241 | 13  | 16  | 17  | RTS_R4_-_412 |
| TSS-REV-579 | REV | 1490328 |     | 1   | 15  | RTS_R4_-_412 |
| TSS-REV-580 | REV | 1493095 | 36  | 36  | 40  | RTS_R4_-_413 |
| TSS-REV-581 | REV | 1493140 | 64  | 64  | 64  | RTS_R4_-_413 |
| TSS-REV-582 | REV | 1498495 | 9   | 9   | 28  | RTS_R4_-_414 |
| TSS-REV-583 | REV | 1504416 |     |     | 3   | RTS_R4_-_415 |
| TSS-REV-584 | REV | 1507112 | 10  | 12  | 12  | RTS_R4_-_416 |
| TSS-REV-585 | REV | 1515242 | 182 | 185 | 257 | RTS_R4_-_417 |
| TSS-REV-586 | REV | 1515272 | 58  | 82  | 83  | RTS_R4_-_417 |
| TSS-REV-587 | REV | 1516888 | 21  | 21  | 21  | RTS_R4_-_418 |
| TSS-REV-588 | REV | 1516897 | 29  | 29  | 29  | RTS_R4_-_418 |
| TSS-REV-589 | REV | 1521181 | 17  | 17  | 17  | RTS_R4_-_419 |
| TSS-REV-590 | REV | 1524030 | 6   | 6   | 6   | RTS_R4_-_420 |
| TSS-REV-591 | REV | 1531895 | 5   | 5   | 5   | RTS_R4_-_421 |
| TSS-REV-592 | REV | 1531900 | 5   | 5   | 5   | RTS_R4_-_421 |
| TSS-REV-593 | REV | 1533900 | 48  | 49  | 50  | RTS_R4_-_422 |
| TSS-REV-594 | REV | 1542127 | 3   | 3   | 3   | RTS_R4_-_423 |
| TSS-REV-595 | REV | 1545227 | 16  | 17  | 17  | RTS_R4_-_424 |
| TSS-REV-596 | REV | 1550736 | 11  | 29  | 38  | RTS_R4_-_425 |
| TSS-REV-597 | REV | 1551862 | 2   | 2   | 2   | RTS_R4_-_426 |
| TSS-REV-598 | REV | 1551892 | 2   | 2   | 2   | RTS_R4_-_426 |
| TSS-REV-599 | REV | 1553716 | 48  | 48  | 48  | RTS_R4_-_427 |
| TSS-REV-600 | REV | 1553726 | 35  | 35  | 35  | RTS_R4_-_427 |
| TSS-REV-601 | REV | 1554071 | 59  | 59  | 60  | RTS_R4_-_428 |
| TSS-REV-602 | REV | 1554479 | 2   | 2   | 2   | RTS_R4_-_429 |
| TSS-REV-603 | REV | 1561168 |     | 1   | 1   | RTS_R4_-_430 |
| TSS-REV-604 | REV | 1565236 | 15  | 15  | 15  | RTS_R4_-_431 |
| TSS-REV-605 | REV | 1565318 | 16  | 16  | 16  | RTS_R4_-_431 |
| TSS-REV-606 | REV | 1567038 | 4   | 4   | 37  | RTS_R4_-_432 |
| TSS-REV-607 | REV | 1568587 | 22  | 22  | 114 | RTS_R4_-_433 |
| TSS-REV-608 | REV | 1570097 | 199 | 199 | 331 | RTS_R4_-_434 |
| TSS-REV-609 | REV | 1584688 | 26  | 26  | 26  | RTS_R4_-_436 |
| TSS-REV-610 | REV | 1586568 | 9   | 9   | 9   | RTS_R4_-_437 |
| TSS-REV-611 | REV | 1588058 | 5   | 5   | 5   | RTS_R4_-_438 |
| TSS-REV-612 | REV | 1590504 | 11  | 13  | 16  | RTS_R4_-_439 |

|             |     |         |      |      |      |              |
|-------------|-----|---------|------|------|------|--------------|
| TSS-REV-613 | REV | 1596621 |      |      | 1    | RTS_R4_-_440 |
| TSS-REV-614 | REV | 1599295 | 10   | 12   | 13   | RTS_R4_-_441 |
| TSS-REV-615 | REV | 1607069 | 9    | 9    | 9    | RTS_R4_-_442 |
| TSS-REV-616 | REV | 1607122 | 9    | 9    | 9    | RTS_R4_-_442 |
| TSS-REV-617 | REV | 1610053 | 4    | 4    | 4    | RTS_R4_-_443 |
| TSS-REV-618 | REV | 1611305 | 17   | 18   | 18   | RTS_R4_-_444 |
| TSS-REV-619 | REV | 1612751 | 124  | 127  | 127  | RTS_R4_-_445 |
| TSS-REV-620 | REV | 1616924 | 17   | 17   | 17   | RTS_R4_-_446 |
| TSS-REV-621 | REV | 1619191 | 30   | 30   | 40   | RTS_R4_-_447 |
| TSS-REV-622 | REV | 1619702 | 1    | 1    | 4    | RTS_R4_-_448 |
| TSS-REV-623 | REV | 1621901 | 8    | 10   | 10   | RTS_R4_-_449 |
| TSS-REV-624 | REV | 1622540 | 1    | 1    | 1    | RTS_R4_-_450 |
| TSS-REV-625 | REV | 1625428 | 113  | 115  | 115  | RTS_R4_-_451 |
| TSS-REV-626 | REV | 1634425 | 2    | 2    | 2    | RTS_R4_-_454 |
| TSS-REV-627 | REV | 1634515 | 2    | 2    | 2    | RTS_R4_-_454 |
| TSS-REV-628 | REV | 1635851 | 268  | 269  | 269  | RTS_R4_-_456 |
| TSS-REV-629 | REV | 1635870 | 340  | 344  | 344  | RTS_R4_-_456 |
| TSS-REV-630 | REV | 1636836 | 1    | 1    | 1    |              |
| TSS-REV-631 | REV | 1638778 | 2    | 2    | 1    |              |
| TSS-REV-632 | REV | 1639516 | 4    | 4    | 4    | RTS_R4_-_457 |
| TSS-REV-633 | REV | 1642531 | 3    | 3    | 1    |              |
| TSS-REV-634 | REV | 1643925 | 487  | 520  | 556  | RTS_R4_-_459 |
| TSS-REV-635 | REV | 1644207 | 5    | 5    | 5    | RTS_R4_-_460 |
| TSS-REV-636 | REV | 1645143 |      | 13   | 83   | RTS_R4_-_461 |
| TSS-REV-637 | REV | 1653729 | 14   | 14   | 14   | RTS_R4_-_463 |
| TSS-REV-638 | REV | 1655507 | 24   | 24   | 25   | RTS_R4_-_464 |
| TSS-REV-639 | REV | 1665277 | 3    | 6    | 6    | RTS_R4_-_465 |
| TSS-REV-640 | REV | 1665281 |      | 6    | 6    | RTS_R4_-_465 |
| TSS-REV-641 | REV | 1665398 | 3    | 5    | 5    | RTS_R4_-_465 |
| TSS-REV-642 | REV | 1666625 | 48   | 49   | 49   | RTS_R4_-_466 |
| TSS-REV-643 | REV | 1667696 | 5    | 5    | 5    | RTS_R4_-_467 |
| TSS-REV-644 | REV | 1667714 | 8    | 8    | 8    | RTS_R4_-_467 |
| TSS-REV-645 | REV | 1669157 | 10   | 11   | 17   | RTS_R4_-_468 |
| TSS-REV-646 | REV | 1669894 | 3    | 5    | 6    | RTS_R4_-_469 |
| TSS-REV-647 | REV | 1671802 | 43   | 43   | 43   | RTS_R4_-_470 |
| TSS-REV-648 | REV | 1675955 | 127  | 127  | 127  | RTS_R4_-_471 |
| TSS-REV-649 | REV | 1676006 | 294  | 294  | 294  | RTS_R4_-_471 |
| TSS-REV-650 | REV | 1676021 | 361  | 361  | 361  | RTS_R4_-_471 |
| TSS-REV-651 | REV | 1676026 | 342  | 342  | 342  | RTS_R4_-_471 |
| TSS-REV-652 | REV | 1676038 | 1877 | 1877 | 1877 | RTS_R4_-_471 |
| TSS-REV-653 | REV | 1680084 | 4    | 4    | 5    | RTS_R4_-_472 |
| TSS-REV-654 | REV | 1680170 | 4    | 4    | 4    | RTS_R4_-_472 |
| TSS-REV-655 | REV | 1682812 | 5    | 5    | 5    | RTS_R4_-_473 |
| TSS-REV-656 | REV | 1686432 | 133  | 133  | 133  | RTS_R4_-_475 |
| TSS-REV-657 | REV | 1686465 | 2475 | 2478 | 2507 | RTS_R4_-_475 |
| TSS-REV-658 | REV | 1694118 | 2    | 2    | 2    | RTS_R4_-_476 |
| TSS-REV-659 | REV | 1695100 | 53   | 53   | 54   | RTS_R4_-_477 |
| TSS-REV-660 | REV | 1696092 | 162  | 166  | 168  | RTS_R4_-_478 |
| TSS-REV-661 | REV | 1696124 | 414  | 414  | 417  | RTS_R4_-_478 |
| TSS-REV-662 | REV | 1696131 | 126  | 130  | 132  | RTS_R4_-_478 |
| TSS-REV-663 | REV | 1696146 | 47   | 47   | 48   | RTS_R4_-_478 |
| TSS-REV-664 | REV | 1697265 | 13   | 15   | 16   | RTS_R4_-_479 |
| TSS-REV-665 | REV | 1702355 | 206  | 206  | 206  | RTS_R4_-_480 |
| TSS-REV-666 | REV | 1710806 |      |      | 3    | RTS_R4_-_481 |
| TSS-REV-667 | REV | 1713968 | 100  | 100  | 100  | RTS_R4_-_482 |
| TSS-REV-668 | REV | 1713997 | 85   | 86   | 87   | RTS_R4_-_482 |
| TSS-REV-669 | REV | 1715311 | 85   | 91   | 93   | RTS_R4_-_483 |
| TSS-REV-670 | REV | 1716058 | 36   | 36   | 36   | RTS_R4_-_484 |
| TSS-REV-671 | REV | 1717654 | 9    | 9    | 9    | RTS_R4_-_486 |
| TSS-REV-672 | REV | 1717806 | 15   | 15   | 15   | RTS_R4_-_486 |
| TSS-REV-673 | REV | 1718877 | 92   | 92   | 92   | RTS_R4_-_487 |
| TSS-REV-674 | REV | 1718884 | 73   | 73   | 74   | RTS_R4_-_487 |
| TSS-REV-675 | REV | 1718894 | 236  | 236  | 236  | RTS_R4_-_487 |

|             |     |         |      |      |      |              |
|-------------|-----|---------|------|------|------|--------------|
| TSS-REV-676 | REV | 1721100 |      | 1    | 1    | RTS_R4_-_488 |
| TSS-REV-677 | REV | 1721114 |      |      | 1    | RTS_R4_-_488 |
| TSS-REV-678 | REV | 1722703 | 44   | 44   | 48   | RTS_R4_-_489 |
| TSS-REV-679 | REV | 1723679 | 116  | 117  | 122  | RTS_R4_-_490 |
| TSS-REV-680 | REV | 1723969 | 29   | 30   | 37   | RTS_R4_-_491 |
| TSS-REV-681 | REV | 1732142 | 390  | 446  | 455  | RTS_R4_-_492 |
| TSS-REV-682 | REV | 1732160 | 1440 | 1441 | 1441 | RTS_R4_-_492 |
| TSS-REV-683 | REV | 1732184 | 473  | 474  | 474  | RTS_R4_-_492 |
| TSS-REV-684 | REV | 1732213 | 184  | 185  | 187  | RTS_R4_-_492 |
| TSS-REV-685 | REV | 1732257 | 220  | 220  | 220  | RTS_R4_-_492 |
| TSS-REV-686 | REV | 1732284 | 898  | 901  | 901  | RTS_R4_-_492 |
| TSS-REV-687 | REV | 1735360 | 20   | 20   | 20   | RTS_R4_-_493 |
| TSS-REV-688 | REV | 1735601 | 3762 | 3809 | 3937 | RTS_R4_-_494 |
| TSS-REV-689 | REV | 1735607 | 1027 | 1031 | 1033 | RTS_R4_-_494 |
| TSS-REV-690 | REV | 1735639 | 521  | 524  | 529  | RTS_R4_-_494 |
| TSS-REV-691 | REV | 1737837 |      | 2    | 3    | RTS_R4_-_495 |
| TSS-REV-692 | REV | 1737851 | 2    | 2    | 2    | RTS_R4_-_495 |
| TSS-REV-693 | REV | 1741299 | 256  | 267  | 269  | RTS_R4_-_496 |
| TSS-REV-694 | REV | 1744226 | 1    | 9    | 9    | RTS_R4_-_497 |
| TSS-REV-695 | REV | 1752725 | 5    | 5    | 5    | RTS_R4_-_498 |
| TSS-REV-696 | REV | 1753189 | 94   | 97   | 125  | RTS_R4_-_499 |
| TSS-REV-697 | REV | 1755409 | 12   | 12   | 12   | RTS_R4_-_500 |
| TSS-REV-698 | REV | 1756883 | 260  | 260  | 295  | RTS_R4_-_501 |
| TSS-REV-699 | REV | 1762442 | 207  | 207  | 208  | RTS_R4_-_502 |
| TSS-REV-700 | REV | 1762523 | 66   | 68   | 71   | RTS_R4_-_502 |
| TSS-REV-701 | REV | 1763170 | 699  | 699  | 699  | RTS_R4_-_504 |
| TSS-REV-702 | REV | 1766940 | 9    | 9    | 9    | RTS_R4_-_505 |
| TSS-REV-703 | REV | 1777365 | 28   | 29   | 30   | RTS_R4_-_506 |
| TSS-REV-704 | REV | 1785185 | 80   | 80   | 81   | RTS_R4_-_507 |
| TSS-REV-705 | REV | 1789278 | 311  | 311  | 313  | RTS_R4_-_508 |
| TSS-REV-706 | REV | 1790123 | 87   | 87   | 87   | RTS_R4_-_509 |
| TSS-REV-707 | REV | 1790180 | 157  | 157  | 159  | RTS_R4_-_509 |
| TSS-REV-708 | REV | 1790215 | 143  | 145  | 145  | RTS_R4_-_509 |
| TSS-REV-709 | REV | 1790784 | 116  | 118  | 120  | RTS_R4_-_510 |
| TSS-REV-710 | REV | 1792219 | 113  | 113  | 113  | RTS_R4_-_511 |
| TSS-REV-711 | REV | 1793201 | 8    | 8    | 8    | RTS_R4_-_512 |
| TSS-REV-712 | REV | 1793744 | 84   | 84   | 100  | RTS_R4_-_513 |
| TSS-REV-713 | REV | 1793791 | 81   | 83   | 99   | RTS_R4_-_513 |
| TSS-REV-714 | REV | 1797159 | 1891 | 1922 | 1923 | RTS_R4_-_514 |
| TSS-REV-715 | REV | 1797217 | 179  | 179  | 179  | RTS_R4_-_514 |
| TSS-REV-716 | REV | 1797274 | 317  | 335  | 338  | RTS_R4_-_514 |
| TSS-REV-717 | REV | 1797327 | 1    | 1    | 41   | RTS_R4_-_514 |
| TSS-REV-718 | REV | 1797807 | 182  | 192  | 192  | RTS_R4_-_515 |
| TSS-REV-719 | REV | 1798126 | 774  | 789  | 790  | RTS_R4_-_516 |
| TSS-REV-720 | REV | 1798135 | 958  | 963  | 963  | RTS_R4_-_516 |
| TSS-REV-721 | REV | 1798300 | 217  | 217  | 217  | RTS_R4_-_516 |
| TSS-REV-722 | REV | 1798314 | 193  | 193  | 193  | RTS_R4_-_516 |
| TSS-REV-723 | REV | 1798355 | 3029 | 3078 | 3093 | RTS_R4_-_516 |
| TSS-REV-724 | REV | 1798394 | 809  | 815  | 817  | RTS_R4_-_516 |
| TSS-REV-725 | REV | 1798841 | 37   | 38   | 38   | RTS_R4_-_517 |
| TSS-REV-726 | REV | 1800756 | 268  | 268  | 268  | RTS_R4_-_518 |
| TSS-REV-727 | REV | 1804192 | 4    | 5    | 6    | RTS_R4_-_519 |
| TSS-REV-728 | REV | 1807286 | 10   | 11   | 26   | RTS_R4_-_520 |
| TSS-REV-729 | REV | 1807374 | 140  | 141  | 141  | RTS_R4_-_520 |
| TSS-REV-730 | REV | 1811716 | 27   | 27   | 28   | RTS_R4_-_521 |
| TSS-REV-731 | REV | 1815394 | 7    | 7    | 7    | RTS_R4_-_522 |
| TSS-REV-732 | REV | 1819667 | 9    | 9    | 9    | RTS_R4_-_523 |
| TSS-REV-733 | REV | 1819750 | 11   | 11   | 11   | RTS_R4_-_523 |
| TSS-REV-734 | REV | 1820301 | 370  | 377  | 390  | RTS_R4_-_524 |
| TSS-REV-735 | REV | 1820307 | 1607 | 2020 | 2301 | RTS_R4_-_524 |
| TSS-REV-736 | REV | 1823147 | 10   | 16   | 359  | RTS_R4_-_525 |
| TSS-REV-737 | REV | 1823713 | 13   | 15   | 21   | RTS_R4_-_526 |
| TSS-REV-738 | REV | 1823756 | 20   | 20   | 20   | RTS_R4_-_526 |



|             |     |         |      |      |      |              |
|-------------|-----|---------|------|------|------|--------------|
| TSS-REV-739 | REV | 1830028 | 9    | 9    | 52   | RTS_R4_-_527 |
| TSS-REV-740 | REV | 1832126 | 4    | 4    | 4    | RTS_R4_-_528 |
| TSS-REV-741 | REV | 1839469 |      | 3    | 3    | RTS_R4_-_529 |
| TSS-REV-742 | REV | 1840186 | 12   | 12   | 12   | RTS_R4_-_530 |
| TSS-REV-743 | REV | 1842041 | 27   | 27   | 27   | RTS_R4_-_531 |
| TSS-REV-744 | REV | 1846054 | 296  | 302  | 303  | RTS_R4_-_532 |
| TSS-REV-745 | REV | 1846726 | 199  | 199  | 199  | RTS_R4_-_533 |
| TSS-REV-746 | REV | 1852910 | 39   | 39   | 41   | RTS_R4_-_534 |
| TSS-REV-747 | REV | 1860488 | 171  | 172  | 177  | RTS_R4_-_535 |
| TSS-REV-748 | REV | 1863677 | 52   | 52   | 53   | RTS_R4_-_536 |
| TSS-REV-749 | REV | 1864528 | 175  | 182  | 182  | RTS_R4_-_537 |
| TSS-REV-750 | REV | 1873622 | 47   | 49   | 49   | RTS_R4_-_538 |
| TSS-REV-751 | REV | 1873636 | 41   | 43   | 43   | RTS_R4_-_538 |
| TSS-REV-752 | REV | 1875579 | 32   | 32   | 32   | RTS_R4_-_539 |
| TSS-REV-753 | REV | 1875669 | 24   | 24   | 24   | RTS_R4_-_539 |
| TSS-REV-754 | REV | 1877294 | 47   | 48   | 52   | RTS_R4_-_540 |
| TSS-REV-755 | REV | 1877321 | 872  | 878  | 992  | RTS_R4_-_540 |
| TSS-REV-756 | REV | 1879872 | 10   | 12   | 13   | RTS_R4_-_543 |
| TSS-REV-757 | REV | 1886087 | 38   | 38   | 38   | RTS_R4_-_544 |
| TSS-REV-758 | REV | 1886158 | 1    | 3    | 126  |              |
| TSS-REV-759 | REV | 1887831 | 1    | 1    | 102  | RTS_R4_-_545 |
| TSS-REV-760 | REV | 1889319 | 220  | 220  | 221  | RTS_R4_-_547 |
| TSS-REV-761 | REV | 1891279 | 2    | 2    | 2    | RTS_R4_-_548 |
| TSS-REV-762 | REV | 1892777 | 42   | 42   | 42   | RTS_R4_-_549 |
| TSS-REV-763 | REV | 1893573 | 6    | 6    | 6    | RTS_R4_-_550 |
| TSS-REV-764 | REV | 1896478 | 3    | 5    | 5    | RTS_R4_-_551 |
| TSS-REV-765 | REV | 1899796 | 20   | 21   | 22   | RTS_R4_-_552 |
| TSS-REV-766 | REV | 1905108 | 34   | 34   | 34   | RTS_R4_-_553 |
| TSS-REV-767 | REV | 1905623 | 100  | 100  | 103  | RTS_R4_-_554 |
| TSS-REV-768 | REV | 1905642 | 1575 | 1575 | 1590 | RTS_R4_-_554 |
| TSS-REV-769 | REV | 1906816 | 57   | 65   | 65   | RTS_R4_-_555 |
| TSS-REV-770 | REV | 1908154 | 481  | 484  | 487  | RTS_R4_-_556 |
| TSS-REV-771 | REV | 1908162 | 253  | 255  | 256  | RTS_R4_-_556 |
| TSS-REV-772 | REV | 1910628 | 57   | 188  | 191  | RTS_R4_-_557 |
| TSS-REV-773 | REV | 1910642 | 383  | 999  | 1010 | RTS_R4_-_557 |
| TSS-REV-774 | REV | 1913679 | 134  | 138  | 139  | RTS_R4_-_558 |
| TSS-REV-775 | REV | 1914138 | 82   | 84   | 84   | RTS_R4_-_559 |
| TSS-REV-776 | REV | 1914188 | 67   | 67   | 67   | RTS_R4_-_559 |
| TSS-REV-777 | REV | 1923017 | 74   | 74   | 74   | RTS_R4_-_562 |
| TSS-REV-778 | REV | 1923331 | 9    | 9    | 9    | RTS_R4_-_563 |
| TSS-REV-779 | REV | 1926889 | 24   | 24   | 24   | RTS_R4_-_564 |
| TSS-REV-780 | REV | 1927758 | 23   | 26   | 26   | RTS_R4_-_565 |
| TSS-REV-781 | REV | 1928440 | 401  | 401  | 411  | RTS_R4_-_566 |
| TSS-REV-782 | REV | 1928790 | 61   | 61   | 62   | RTS_R4_-_567 |
| TSS-REV-783 | REV | 1930807 | 38   | 51   | 55   | RTS_R4_-_568 |
| TSS-REV-784 | REV | 1930823 | 45   | 51   | 51   | RTS_R4_-_568 |
| TSS-REV-785 | REV | 1931066 | 9    | 9    | 9    | RTS_R4_-_568 |
| TSS-REV-786 | REV | 1932737 | 14   | 14   | 14   | RTS_R4_-_569 |
| TSS-REV-787 | REV | 1934383 | 270  | 270  | 270  | RTS_R4_-_570 |
| TSS-REV-788 | REV | 1934391 | 674  | 677  | 677  | RTS_R4_-_570 |
| TSS-REV-789 | REV | 1934398 | 204  | 207  | 207  | RTS_R4_-_570 |
| TSS-REV-790 | REV | 1934491 | 84   | 84   | 85   | RTS_R4_-_570 |
| TSS-REV-791 | REV | 1938245 | 92   | 93   | 93   | RTS_R4_-_571 |
| TSS-REV-792 | REV | 1938252 | 128  | 131  | 131  | RTS_R4_-_571 |
| TSS-REV-793 | REV | 1940621 | 303  | 303  | 306  | RTS_R4_-_572 |
| TSS-REV-794 | REV | 1940637 | 300  | 300  | 303  | RTS_R4_-_572 |
| TSS-REV-795 | REV | 1944032 | 62   | 62   | 62   | RTS_R4_-_573 |
| TSS-REV-796 | REV | 1944149 | 19   | 29   | 84   | RTS_R4_-_573 |
| TSS-REV-797 | REV | 1948641 | 1043 | 1046 | 1047 | RTS_R4_-_575 |
| TSS-REV-798 | REV | 1957896 | 51   | 51   | 51   | RTS_R4_-_577 |
| TSS-REV-799 | REV | 1970739 | 171  | 171  | 171  | RTS_R4_-_578 |
| TSS-REV-800 | REV | 1975324 | 500  | 511  | 511  | RTS_R4_-_579 |
| TSS-REV-801 | REV | 1976303 | 9    | 9    | 9    | RTS_R4_-_580 |

|             |     |         |      |      |      |              |
|-------------|-----|---------|------|------|------|--------------|
| TSS-REV-802 | REV | 1976309 | 14   | 14   | 14   | RTS_R4_-_580 |
| TSS-REV-803 | REV | 1979674 | 120  | 122  | 125  | RTS_R4_-_582 |
| TSS-REV-804 | REV | 1980464 | 91   | 93   | 118  | RTS_R4_-_583 |
| TSS-REV-805 | REV | 1985809 | 98   | 98   | 98   | RTS_R4_-_586 |
| TSS-REV-806 | REV | 1986026 | 667  | 667  | 667  | RTS_R4_-_587 |
| TSS-REV-807 | REV | 1987525 |      | 2    | 33   | RTS_R4_-_588 |
| TSS-REV-808 | REV | 1989673 | 57   | 57   | 58   | RTS_R4_-_589 |
| TSS-REV-809 | REV | 1990141 | 55   | 65   | 83   | RTS_R4_-_590 |
| TSS-REV-810 | REV | 1990874 | 399  | 401  | 403  | RTS_R4_-_591 |
| TSS-REV-811 | REV | 1993427 | 33   | 36   | 38   | RTS_R4_-_592 |
| TSS-REV-812 | REV | 1993595 | 27   | 27   | 27   | RTS_R4_-_592 |
| TSS-REV-813 | REV | 1994917 | 7    | 7    | 7    | RTS_R4_-_593 |
| TSS-REV-814 | REV | 1994934 | 8    | 9    | 9    | RTS_R4_-_593 |
| TSS-REV-815 | REV | 1996664 | 11   | 11   | 11   | RTS_R4_-_594 |
| TSS-REV-816 | REV | 1997532 | 165  | 167  | 181  | RTS_R4_-_595 |
| TSS-REV-817 | REV | 1998422 | 60   | 61   | 62   | RTS_R4_-_596 |
| TSS-REV-818 | REV | 1998434 | 521  | 521  | 523  | RTS_R4_-_596 |
| TSS-REV-819 | REV | 1998492 | 385  | 391  | 396  | RTS_R4_-_596 |
| TSS-REV-820 | REV | 1999843 | 126  | 126  | 126  | RTS_R4_-_597 |
| TSS-REV-821 | REV | 2001653 | 132  | 133  | 133  | RTS_R4_-_598 |
| TSS-REV-822 | REV | 2001699 | 945  | 951  | 951  | RTS_R4_-_598 |
| TSS-REV-823 | REV | 2006138 | 116  | 117  | 121  | RTS_R4_-_599 |
| TSS-REV-824 | REV | 2022868 | 16   | 16   | 16   | RTS_R4_-_600 |
| TSS-REV-825 | REV | 2026237 |      | 1    | 9    | RTS_R4_-_602 |
| TSS-REV-826 | REV | 2027413 | 34   | 34   | 34   | RTS_R4_-_603 |
| TSS-REV-827 | REV | 2030365 | 20   | 20   | 20   | RTS_R4_-_604 |
| TSS-REV-828 | REV | 2031465 | 38   | 38   | 38   | RTS_R4_-_605 |
| TSS-REV-829 | REV | 2031494 | 49   | 49   | 49   | RTS_R4_-_605 |
| TSS-REV-830 | REV | 2036840 | 36   | 37   | 37   | RTS_R4_-_606 |
| TSS-REV-831 | REV | 2039280 | 7    | 7    | 8    | RTS_R4_-_607 |
| TSS-REV-832 | REV | 2041581 | 500  | 1601 | 2989 | RTS_R4_-_608 |
| TSS-REV-833 | REV | 2051659 |      | 6    | 6    | RTS_R4_-_609 |
| TSS-REV-834 | REV | 2056126 | 306  | 756  | 1210 | RTS_R4_-_610 |
| TSS-REV-835 | REV | 2057871 |      | 1    | 1    | RTS_R4_-_611 |
| TSS-REV-836 | REV | 2058964 | 48   | 48   | 48   | RTS_R4_-_612 |
| TSS-REV-837 | REV | 2060074 | 9    | 9    | 9    | RTS_R4_-_613 |
| TSS-REV-838 | REV | 2061377 | 11   | 17   | 33   | RTS_R4_-_614 |
| TSS-REV-839 | REV | 2064019 | 4    | 4    | 4    | RTS_R4_-_615 |
| TSS-REV-840 | REV | 2064031 | 6    | 6    | 6    | RTS_R4_-_615 |
| TSS-REV-841 | REV | 2065503 | 6    | 6    | 6    | RTS_R4_-_617 |
| TSS-REV-842 | REV | 2066314 | 138  | 141  | 143  | RTS_R4_-_618 |
| TSS-REV-843 | REV | 2066507 | 12   | 47   | 52   | RTS_R4_-_618 |
| TSS-REV-844 | REV | 2068377 | 1    | 1    | 1    | RTS_R4_-_619 |
| TSS-REV-845 | REV | 2072764 | 16   | 16   | 16   | RTS_R4_-_620 |
| TSS-REV-846 | REV | 2076010 | 2    | 4    | 4    | RTS_R4_-_621 |
| TSS-REV-847 | REV | 2077410 | 1333 | 1345 | 1346 | RTS_R4_-_622 |
| TSS-REV-848 | REV | 2077416 | 771  | 776  | 777  | RTS_R4_-_622 |
| TSS-REV-849 | REV | 2077428 | 248  | 256  | 256  | RTS_R4_-_622 |
| TSS-REV-850 | REV | 2077440 | 1532 | 1572 | 1574 | RTS_R4_-_622 |
| TSS-REV-851 | REV | 2077492 | 199  | 199  | 199  | RTS_R4_-_622 |
| TSS-REV-852 | REV | 2077541 | 131  | 132  | 132  | RTS_R4_-_622 |
| TSS-REV-853 | REV | 2079301 | 4    | 6    | 12   | RTS_R4_-_623 |
| TSS-REV-854 | REV | 2079343 | 12   | 12   | 12   | RTS_R4_-_623 |
| TSS-REV-855 | REV | 2079350 | 13   | 13   | 16   | RTS_R4_-_623 |
| TSS-REV-856 | REV | 2083525 | 18   | 18   | 18   | RTS_R4_-_625 |
| TSS-REV-857 | REV | 2083552 | 23   | 24   | 24   | RTS_R4_-_625 |
| TSS-REV-858 | REV | 2083576 | 24   | 24   | 24   | RTS_R4_-_625 |
| TSS-REV-859 | REV | 2085346 | 38   | 39   | 42   | RTS_R4_-_626 |
| TSS-REV-860 | REV | 2087176 | 46   | 47   | 51   | RTS_R4_-_627 |
| TSS-REV-861 | REV | 2087755 | 128  | 135  | 138  | RTS_R4_-_628 |
| TSS-REV-862 | REV | 2096336 | 54   | 54   | 54   | RTS_R4_-_629 |
| TSS-REV-863 | REV | 2096346 | 79   | 79   | 79   | RTS_R4_-_629 |
| TSS-REV-864 | REV | 2096355 | 176  | 176  | 176  | RTS_R4_-_629 |

|             |     |         |      |      |      |              |
|-------------|-----|---------|------|------|------|--------------|
| TSS-REV-865 | REV | 2097696 | 5    | 5    | 5    | RTS_R4_-_630 |
| TSS-REV-866 | REV | 2099348 | 456  | 462  | 462  | RTS_R4_-_631 |
| TSS-REV-867 | REV | 2099381 | 141  | 141  | 141  | RTS_R4_-_631 |
| TSS-REV-868 | REV | 2100996 | 12   | 12   | 12   | RTS_R4_-_633 |
| TSS-REV-869 | REV | 2101009 | 8    | 8    | 8    | RTS_R4_-_633 |
| TSS-REV-870 | REV | 2103361 | 34   | 34   | 34   | RTS_R4_-_634 |
| TSS-REV-871 | REV | 2106453 | 625  | 625  | 625  | RTS_R4_-_635 |
| TSS-REV-872 | REV | 2106482 | 600  | 600  | 600  | RTS_R4_-_635 |
| TSS-REV-873 | REV | 2106493 | 688  | 688  | 688  | RTS_R4_-_635 |
| TSS-REV-874 | REV | 2106518 | 892  | 893  | 893  | RTS_R4_-_635 |
| TSS-REV-875 | REV | 2107775 | 6    | 6    | 6    | RTS_R4_-_636 |
| TSS-REV-876 | REV | 2107921 | 9    | 9    | 9    | RTS_R4_-_636 |
| TSS-REV-877 | REV | 2107951 | 8    | 8    | 8    | RTS_R4_-_636 |
| TSS-REV-878 | REV | 2109097 | 2918 | 2922 | 2927 | RTS_R4_-_637 |
| TSS-REV-879 | REV | 2109105 | 103  | 103  | 103  | RTS_R4_-_637 |
| TSS-REV-880 | REV | 2109125 | 706  | 706  | 706  | RTS_R4_-_637 |
| TSS-REV-881 | REV | 2111256 | 82   | 82   | 82   | RTS_R4_-_638 |
| TSS-REV-882 | REV | 2112375 | 109  | 109  | 109  | RTS_R4_-_639 |
| TSS-REV-883 | REV | 2112440 | 236  | 236  | 237  | RTS_R4_-_639 |
| TSS-REV-884 | REV | 2140303 | 186  | 194  | 197  | RTS_R4_-_640 |
| TSS-REV-885 | REV | 2141004 | 15   | 15   | 15   | RTS_R4_-_641 |
| TSS-REV-886 | REV | 2141028 | 9    | 9    | 9    | RTS_R4_-_641 |
| TSS-REV-887 | REV | 2145583 | 3    | 3    | 11   | RTS_R4_-_642 |
| TSS-REV-888 | REV | 2149011 | 3    | 3    | 3    | RTS_R4_-_643 |
| TSS-REV-889 | REV | 2149067 | 3    | 3    | 3    | RTS_R4_-_643 |
| TSS-REV-890 | REV | 2165572 | 134  | 140  | 140  | RTS_R4_-_644 |
| TSS-REV-891 | REV | 2169773 | 102  | 102  | 102  | RTS_R4_-_646 |
| TSS-REV-892 | REV | 2175234 | 379  | 391  | 392  | RTS_R4_-_647 |
| TSS-REV-893 | REV | 2175250 | 351  | 353  | 353  | RTS_R4_-_647 |
| TSS-REV-894 | REV | 2175256 | 3811 | 3813 | 3817 | RTS_R4_-_647 |
| TSS-REV-895 | REV | 2176631 | 31   | 31   | 32   | RTS_R4_-_648 |
| TSS-REV-896 | REV | 2176655 | 37   | 37   | 38   | RTS_R4_-_648 |
| TSS-REV-897 | REV | 2180828 | 5    | 8    | 8    | RTS_R4_-_649 |
| TSS-REV-898 | REV | 2183456 | 23   | 23   | 23   | RTS_R4_-_650 |
| TSS-REV-899 | REV | 2183473 | 27   | 29   | 29   | RTS_R4_-_650 |
| TSS-REV-900 | REV | 2183843 | 6    | 6    | 6    | RTS_R4_-_651 |
| TSS-REV-901 | REV | 2190296 | 14   | 22   | 22   | RTS_R4_-_652 |
| TSS-REV-902 | REV | 2190865 | 90   | 90   | 92   | RTS_R4_-_653 |
| TSS-REV-903 | REV | 2192222 | 165  | 168  | 171  | RTS_R4_-_654 |
| TSS-REV-904 | REV | 2209224 |      | 1    | 1    | RTS_R4_-_655 |
| TSS-REV-905 | REV | 2210248 | 7    | 7    | 7    | RTS_R4_-_656 |
| TSS-REV-906 | REV | 2212693 | 22   | 22   | 22   | RTS_R4_-_657 |
| TSS-REV-907 | REV | 2217545 | 106  | 106  | 109  | RTS_R4_-_658 |
| TSS-REV-908 | REV | 2220064 | 26   | 26   | 26   | RTS_R4_-_659 |
| TSS-REV-909 | REV | 2222949 | 3    | 3    | 3    | RTS_R4_-_660 |
| TSS-REV-910 | REV | 2223673 | 1    | 2    | 15   | RTS_R4_-_661 |
| TSS-REV-911 | REV | 2223686 | 4    | 4    | 20   | RTS_R4_-_661 |
| TSS-REV-912 | REV | 2225320 | 6    | 6    | 6    | RTS_R4_-_662 |
| TSS-REV-913 | REV | 2228423 | 14   | 14   | 14   | RTS_R4_-_663 |
| TSS-REV-914 | REV | 2228429 | 14   | 14   | 14   | RTS_R4_-_663 |
| TSS-REV-915 | REV | 2236029 | 8    | 8    | 8    | RTS_R4_-_664 |
| TSS-REV-916 | REV | 2238475 | 42   | 45   | 45   | RTS_R4_-_665 |
| TSS-REV-917 | REV | 2241821 | 86   | 86   | 86   | RTS_R4_-_666 |
| TSS-REV-918 | REV | 2244951 | 16   | 16   | 16   | RTS_R4_-_667 |
| TSS-REV-919 | REV | 2246582 | 94   | 95   | 95   | RTS_R4_-_668 |
| TSS-REV-920 | REV | 2247664 | 59   | 60   | 62   | RTS_R4_-_669 |
| TSS-REV-921 | REV | 2247938 |      | 1    | 1    | RTS_R4_-_670 |
| TSS-REV-922 | REV | 2261616 | 31   | 31   | 31   | RTS_R4_-_671 |
| TSS-REV-923 | REV | 2276298 | 25   | 25   | 172  | RTS_R4_-_672 |
| TSS-REV-924 | REV | 2278527 | 50   | 50   | 50   | RTS_R4_-_673 |
| TSS-REV-925 | REV | 2278553 | 45   | 45   | 45   | RTS_R4_-_673 |
| TSS-REV-926 | REV | 2278566 | 67   | 68   | 68   | RTS_R4_-_673 |
| TSS-REV-927 | REV | 2281991 | 61   | 61   | 61   | RTS_R4_-_674 |

|             |     |         |      |      |      |              |
|-------------|-----|---------|------|------|------|--------------|
| TSS-REV-928 | REV | 2282034 | 41   | 41   | 41   | RTS_R4_-_674 |
| TSS-REV-929 | REV | 2286797 | 26   | 27   | 27   | RTS_R4_-_675 |
| TSS-REV-930 | REV | 2288240 | 2    | 2    | 2    | RTS_R4_-_676 |
| TSS-REV-931 | REV | 2295930 | 3    | 3    | 3    | RTS_R4_-_677 |
| TSS-REV-932 | REV | 2304826 | 22   | 22   | 22   | RTS_R4_-_679 |
| TSS-REV-933 | REV | 2306662 | 12   | 12   | 12   | RTS_R4_-_680 |
| TSS-REV-934 | REV | 2308429 | 8    | 9    | 10   | RTS_R4_-_681 |
| TSS-REV-935 | REV | 2310826 | 69   | 72   | 72   | RTS_R4_-_682 |
| TSS-REV-936 | REV | 2310858 | 35   | 36   | 36   | RTS_R4_-_682 |
| TSS-REV-937 | REV | 2318151 | 19   | 19   | 19   | RTS_R4_-_683 |
| TSS-REV-938 | REV | 2337473 | 107  | 113  | 114  | RTS_R4_-_684 |
| TSS-REV-939 | REV | 2337479 | 126  | 141  | 142  | RTS_R4_-_684 |
| TSS-REV-940 | REV | 2340036 | 1    | 1    | 1    | RTS_R4_-_685 |
| TSS-REV-941 | REV | 2342788 | 12   | 12   | 12   |              |
| TSS-REV-942 | REV | 2347522 | 28   | 28   | 28   | RTS_R4_-_686 |
| TSS-REV-943 | REV | 2350000 |      | 1    | 1    | RTS_R4_-_687 |
| TSS-REV-944 | REV | 2360256 | 2    | 2    | 2    | RTS_R4_-_688 |
| TSS-REV-945 | REV | 2361677 | 12   | 12   | 12   | RTS_R4_-_689 |
| TSS-REV-946 | REV | 2362329 | 25   | 25   | 25   | RTS_R4_-_690 |
| TSS-REV-947 | REV | 2362338 | 28   | 28   | 28   | RTS_R4_-_690 |
| TSS-REV-948 | REV | 2371594 | 16   | 16   | 23   | RTS_R4_-_691 |
| TSS-REV-949 | REV | 2374936 | 131  | 133  | 133  | RTS_R4_-_692 |
| TSS-REV-950 | REV | 2378723 | 8    | 8    | 10   | RTS_R4_-_693 |
| TSS-REV-951 | REV | 2379075 | 1789 | 1834 | 1982 | RTS_R4_-_694 |
| TSS-REV-952 | REV | 2379587 | 64   | 64   | 65   | RTS_R4_-_695 |
| TSS-REV-953 | REV | 2383776 | 1    | 1    | 1    | RTS_R4_-_696 |
| TSS-REV-954 | REV | 2383833 |      | 1    | 1    | RTS_R4_-_696 |
| TSS-REV-955 | REV | 2403158 | 87   | 88   | 89   | RTS_R4_-_697 |
| TSS-REV-956 | REV | 2403180 | 113  | 113  | 113  | RTS_R4_-_697 |
| TSS-REV-957 | REV | 2403201 | 77   | 78   | 78   | RTS_R4_-_697 |
| TSS-REV-958 | REV | 2403219 | 319  | 319  | 319  | RTS_R4_-_697 |
| TSS-REV-959 | REV | 2403397 | 24   | 24   | 24   | RTS_R4_-_697 |
| TSS-REV-960 | REV | 2404785 | 107  | 109  | 109  | RTS_R4_-_698 |
| TSS-REV-961 | REV | 2405023 | 9    | 13   | 13   | RTS_R4_-_698 |
| TSS-REV-962 | REV | 2405123 | 8    | 8    | 8    | RTS_R4_-_698 |
| TSS-REV-963 | REV | 2409504 | 17   | 23   | 38   | RTS_R4_-_699 |
| TSS-REV-964 | REV | 2410652 | 2517 | 2530 | 2534 | RTS_R4_-_700 |
| TSS-REV-965 | REV | 2410658 | 242  | 243  | 243  | RTS_R4_-_700 |
| TSS-REV-966 | REV | 2410667 | 107  | 108  | 108  | RTS_R4_-_700 |
| TSS-REV-967 | REV | 2411591 | 12   | 12   | 12   | RTS_R4_-_701 |
| TSS-REV-968 | REV | 2411704 | 10   | 11   | 18   | RTS_R4_-_701 |
| TSS-REV-969 | REV | 2417830 | 145  | 146  | 146  | RTS_R4_-_702 |
| TSS-REV-970 | REV | 2418525 | 11   | 12   | 12   | RTS_R4_-_703 |
| TSS-REV-971 | REV | 2418532 | 12   | 12   | 12   | RTS_R4_-_703 |
| TSS-REV-972 | REV | 2424837 | 100  | 114  | 114  | RTS_R4_-_705 |
| TSS-REV-973 | REV | 2424844 | 396  | 417  | 418  | RTS_R4_-_705 |
| TSS-REV-974 | REV | 2424859 | 601  | 626  | 628  | RTS_R4_-_705 |
| TSS-REV-975 | REV | 2425901 | 239  | 243  | 243  | RTS_R4_-_706 |
| TSS-REV-976 | REV | 2425959 | 290  | 291  | 302  | RTS_R4_-_706 |
| TSS-REV-977 | REV | 2428847 | 69   | 69   | 69   | RTS_R4_-_707 |
| TSS-REV-978 | REV | 2429694 | 16   | 16   | 17   | RTS_R4_-_708 |
| TSS-REV-979 | REV | 2429833 | 17   | 17   | 17   | RTS_R4_-_708 |
| TSS-REV-980 | REV | 2431995 | 208  | 208  | 208  | RTS_R4_-_709 |
| TSS-REV-981 | REV | 2432036 | 543  | 544  | 544  | RTS_R4_-_709 |
| TSS-REV-982 | REV | 2433217 | 39   | 41   | 42   | RTS_R4_-_710 |
| TSS-REV-983 | REV | 2435363 | 7    | 7    | 7    | RTS_R4_-_711 |
| TSS-REV-984 | REV | 2435905 | 69   | 69   | 69   | RTS_R4_-_712 |
| TSS-REV-985 | REV | 2439663 | 245  | 246  | 247  | RTS_R4_-_713 |
| TSS-REV-986 | REV | 2442251 | 38   | 38   | 38   | RTS_R4_-_714 |
| TSS-REV-987 | REV | 2442286 | 56   | 56   | 56   | RTS_R4_-_714 |
| TSS-REV-988 | REV | 2446495 | 15   | 15   | 16   | RTS_R4_-_715 |
| TSS-REV-989 | REV | 2447951 | 5    | 5    | 5    | RTS_R4_-_716 |
| TSS-REV-990 | REV | 2452762 | 2    | 2    | 2    | RTS_R4_-_717 |

|              |     |         |      |      |      |              |
|--------------|-----|---------|------|------|------|--------------|
| TSS-REV-991  | REV | 2454827 | 31   | 31   | 32   | RTS_R4_-_718 |
| TSS-REV-992  | REV | 2454938 | 41   | 41   | 41   | RTS_R4_-_718 |
| TSS-REV-993  | REV | 2458531 | 23   | 23   | 48   | RTS_R4_-_719 |
| TSS-REV-994  | REV | 2459001 | 428  | 484  | 487  | RTS_R4_-_720 |
| TSS-REV-995  | REV | 2463106 | 57   | 62   | 62   | RTS_R4_-_721 |
| TSS-REV-996  | REV | 2463157 | 111  | 111  | 128  | RTS_R4_-_721 |
| TSS-REV-997  | REV | 2468671 | 99   | 107  | 114  | RTS_R4_-_722 |
| TSS-REV-998  | REV | 2468686 | 144  | 144  | 145  | RTS_R4_-_722 |
| TSS-REV-999  | REV | 2475745 | 2    | 2    | 2    | RTS_R4_-_723 |
| TSS-REV-1000 | REV | 2486315 | 5    | 5    | 8    | RTS_R4_-_724 |
| TSS-REV-1001 | REV | 2493341 | 13   | 22   | 27   | RTS_R4_-_725 |
| TSS-REV-1002 | REV | 2496467 | 19   | 19   | 19   | RTS_R4_-_726 |
| TSS-REV-1003 | REV | 2507954 | 12   | 12   | 13   | RTS_R4_-_727 |
| TSS-REV-1004 | REV | 2510851 | 9    | 9    | 17   | RTS_R4_-_728 |
| TSS-REV-1005 | REV | 2510875 | 11   | 11   | 12   | RTS_R4_-_728 |
| TSS-REV-1006 | REV | 2515900 | 29   | 29   | 29   | RTS_R4_-_729 |
| TSS-REV-1007 | REV | 2516263 | 32   | 32   | 32   | RTS_R4_-_730 |
| TSS-REV-1008 | REV | 2518736 | 290  | 301  | 306  | RTS_R4_-_731 |
| TSS-REV-1009 | REV | 2518746 | 185  | 186  | 186  | RTS_R4_-_731 |
| TSS-REV-1010 | REV | 2518796 | 65   | 66   | 66   | RTS_R4_-_731 |
| TSS-REV-1011 | REV | 2520518 | 4    | 4    | 4    | RTS_R4_-_732 |
| TSS-REV-1012 | REV | 2520527 | 3    | 3    | 3    | RTS_R4_-_732 |
| TSS-REV-1013 | REV | 2528246 | 61   | 61   | 61   | RTS_R4_-_734 |
| TSS-REV-1014 | REV | 2529301 | 30   | 30   | 30   | RTS_R4_-_735 |
| TSS-REV-1015 | REV | 2535298 | 25   | 29   | 29   | RTS_R4_-_736 |
| TSS-REV-1016 | REV | 2535305 | 18   | 18   | 18   | RTS_R4_-_736 |
| TSS-REV-1017 | REV | 2541580 | 336  | 336  | 336  | RTS_R4_-_737 |
| TSS-REV-1018 | REV | 2542686 | 74   | 78   | 157  | RTS_R4_-_738 |
| TSS-REV-1019 | REV | 2548612 | 147  | 148  | 148  | RTS_R4_-_740 |
| TSS-REV-1020 | REV | 2548680 | 260  | 272  | 275  | RTS_R4_-_740 |
| TSS-REV-1021 | REV | 2550165 | 6    | 6    | 6    | RTS_R4_-_741 |
| TSS-REV-1022 | REV | 2550190 | 7    | 7    | 7    | RTS_R4_-_741 |
| TSS-REV-1023 | REV | 2550324 | 9    | 9    | 9    | RTS_R4_-_741 |
| TSS-REV-1024 | REV | 2556832 | 11   | 11   | 11   | RTS_R4_-_742 |
| TSS-REV-1025 | REV | 2556852 | 15   | 15   | 15   | RTS_R4_-_742 |
| TSS-REV-1026 | REV | 2559079 |      |      | 2    | RTS_R4_-_743 |
| TSS-REV-1027 | REV | 2576431 | 201  | 202  | 204  | RTS_R4_-_744 |
| TSS-REV-1028 | REV | 2576547 | 126  | 127  | 131  | RTS_R4_-_744 |
| TSS-REV-1029 | REV | 2576553 | 735  | 735  | 738  | RTS_R4_-_744 |
| TSS-REV-1030 | REV | 2580921 | 30   | 30   | 30   | RTS_R4_-_745 |
| TSS-REV-1031 | REV | 2580929 | 23   | 23   | 23   | RTS_R4_-_745 |
| TSS-REV-1032 | REV | 2581523 | 59   | 59   | 59   | RTS_R4_-_746 |
| TSS-REV-1033 | REV | 2588907 | 141  | 154  | 165  | RTS_R4_-_747 |
| TSS-REV-1034 | REV | 2591811 | 33   | 34   | 35   | RTS_R4_-_748 |
| TSS-REV-1035 | REV | 2594785 | 21   | 21   | 27   | RTS_R4_-_749 |
| TSS-REV-1036 | REV | 2594806 | 22   | 22   | 23   | RTS_R4_-_749 |
| TSS-REV-1037 | REV | 2595666 | 211  | 212  | 212  | RTS_R4_-_750 |
| TSS-REV-1038 | REV | 2595676 | 817  | 817  | 817  | RTS_R4_-_750 |
| TSS-REV-1039 | REV | 2595755 | 131  | 133  | 133  | RTS_R4_-_750 |
| TSS-REV-1040 | REV | 2597806 | 352  | 354  | 354  | RTS_R4_-_751 |
| TSS-REV-1041 | REV | 2613938 | 3    | 3    | 3    | RTS_R4_-_752 |
| TSS-REV-1042 | REV | 2616827 | 21   | 25   | 25   | RTS_R4_-_753 |
| TSS-REV-1043 | REV | 2618258 | 151  | 151  | 151  | RTS_R4_-_754 |
| TSS-REV-1044 | REV | 2618264 | 120  | 120  | 120  | RTS_R4_-_754 |
| TSS-REV-1045 | REV | 2618924 | 112  | 118  | 118  | RTS_R4_-_755 |
| TSS-REV-1046 | REV | 2618931 | 1768 | 1771 | 1771 | RTS_R4_-_755 |
| TSS-REV-1047 | REV | 2630583 | 53   | 53   | 53   | RTS_R4_-_756 |
| TSS-REV-1048 | REV | 2630625 | 2309 | 2309 | 2309 | RTS_R4_-_756 |
| TSS-REV-1049 | REV | 2630663 | 104  | 104  | 104  | RTS_R4_-_756 |
| TSS-REV-1050 | REV | 2632099 | 203  | 204  | 204  | RTS_R4_-_757 |
| TSS-REV-1051 | REV | 2632112 | 266  | 268  | 268  | RTS_R4_-_757 |
| TSS-REV-1052 | REV | 2632120 | 1163 | 1165 | 1165 | RTS_R4_-_757 |
| TSS-REV-1053 | REV | 2632127 | 8655 | 8663 | 8663 | RTS_R4_-_757 |

|              |     |         |      |       |       |              |
|--------------|-----|---------|------|-------|-------|--------------|
| TSS-REV-1054 | REV | 2633893 | 65   | 66    | 66    | RTS_R4_-_758 |
| TSS-REV-1055 | REV | 2635401 | 81   | 81    | 82    | RTS_R4_-_759 |
| TSS-REV-1056 | REV | 2635441 | 300  | 301   | 301   | RTS_R4_-_759 |
| TSS-REV-1057 | REV | 2635482 | 68   | 68    | 68    | RTS_R4_-_759 |
| TSS-REV-1058 | REV | 2635811 | 112  | 113   | 113   | RTS_R4_-_759 |
| TSS-REV-1059 | REV | 2638708 | 149  | 149   | 149   | RTS_R4_-_760 |
| TSS-REV-1060 | REV | 2640937 | 28   | 28    | 31    | RTS_R4_-_761 |
| TSS-REV-1061 | REV | 2640954 | 31   | 31    | 31    | RTS_R4_-_761 |
| TSS-REV-1062 | REV | 2641026 | 31   | 31    | 31    | RTS_R4_-_761 |
| TSS-REV-1063 | REV | 2642409 | 67   | 67    | 67    | RTS_R4_-_762 |
| TSS-REV-1064 | REV | 2642905 | 57   | 57    | 57    | RTS_R4_-_763 |
| TSS-REV-1065 | REV | 2642935 | 1686 | 1687  | 1688  | RTS_R4_-_763 |
| TSS-REV-1066 | REV | 2648867 | 29   | 29    | 29    | RTS_R4_-_764 |
| TSS-REV-1067 | REV | 2650349 | 4    | 4     | 4     | RTS_R4_-_765 |
| TSS-REV-1068 | REV | 2650424 | 6    | 6     | 6     | RTS_R4_-_765 |
| TSS-REV-1069 | REV | 2651695 | 12   | 12    | 12    | RTS_R4_-_766 |
| TSS-REV-1070 | REV | 2654561 | 210  | 210   | 211   | RTS_R4_-_767 |
| TSS-REV-1071 | REV | 2654589 | 107  | 109   | 115   | RTS_R4_-_767 |
| TSS-REV-1072 | REV | 2657012 | 191  | 195   | 196   | RTS_R4_-_768 |
| TSS-REV-1073 | REV | 2657928 | 33   | 33    | 35    | RTS_R4_-_769 |
| TSS-REV-1074 | REV | 2658178 | 32   | 32    | 32    | RTS_R4_-_769 |
| TSS-REV-1075 | REV | 2660290 | 183  | 191   | 191   | RTS_R4_-_770 |
| TSS-REV-1076 | REV | 2661369 | 284  | 285   | 287   | RTS_R4_-_771 |
| TSS-REV-1077 | REV | 2666961 | 8    | 8     | 8     | RTS_R4_-_772 |
| TSS-REV-1078 | REV | 2666967 | 5    | 5     | 5     | RTS_R4_-_772 |
| TSS-REV-1079 | REV | 2675475 |      | 1     | 1     | RTS_R4_-_773 |
| TSS-REV-1080 | REV | 2675603 |      | 1     | 1     | RTS_R4_-_773 |
| TSS-REV-1081 | REV | 2677426 |      | 1     | 1     | RTS_R4_-_774 |
| TSS-REV-1082 | REV | 2680419 | 1    | 1     | 1     | RTS_R4_-_775 |
| TSS-REV-1083 | REV | 2683559 | 466  | 466   | 466   | RTS_R4_-_776 |
| TSS-REV-1084 | REV | 2683594 | 1333 | 1334  | 1335  | RTS_R4_-_776 |
| TSS-REV-1085 | REV | 2685463 | 300  | 302   | 303   | RTS_R4_-_777 |
| TSS-REV-1086 | REV | 2685545 | 162  | 162   | 162   | RTS_R4_-_777 |
| TSS-REV-1087 | REV | 2688207 | 13   | 13    | 13    | RTS_R4_-_778 |
| TSS-REV-1088 | REV | 2688341 | 15   | 15    | 15    | RTS_R4_-_778 |
| TSS-REV-1089 | REV | 2689362 | 239  | 271   | 300   | RTS_R4_-_779 |
| TSS-REV-1090 | REV | 2693611 | 113  | 113   | 113   | RTS_R4_-_780 |
| TSS-REV-1091 | REV | 2696606 | 14   | 15    | 15    | RTS_R4_-_781 |
| TSS-REV-1092 | REV | 2696614 | 17   | 18    | 22    | RTS_R4_-_781 |
| TSS-REV-1093 | REV | 2698358 | 376  | 376   | 381   | RTS_R4_-_782 |
| TSS-REV-1094 | REV | 2702104 | 113  | 113   | 113   | RTS_R4_-_783 |
| TSS-REV-1095 | REV | 2702115 | 531  | 538   | 539   | RTS_R4_-_783 |
| TSS-REV-1096 | REV | 2702123 | 2243 | 2255  | 2256  | RTS_R4_-_783 |
| TSS-REV-1097 | REV | 2702205 | 588  | 590   | 590   | RTS_R4_-_783 |
| TSS-REV-1098 | REV | 2705232 | 139  | 139   | 139   | RTS_R4_-_784 |
| TSS-REV-1099 | REV | 2707434 | 34   | 34    | 34    | RTS_R4_-_785 |
| TSS-REV-1100 | REV | 2707441 | 32   | 34    | 35    | RTS_R4_-_785 |
| TSS-REV-1101 | REV | 2707472 | 31   | 34    | 52    | RTS_R4_-_785 |
| TSS-REV-1102 | REV | 2707589 | 25   | 25    | 44    | RTS_R4_-_785 |
| TSS-REV-1103 | REV | 2707654 | 22   | 35    | 82    | RTS_R4_-_785 |
| TSS-REV-1104 | REV | 2708110 |      |       | 24    | RTS_R4_-_786 |
| TSS-REV-1105 | REV | 2708252 | 149  | 151   | 151   | RTS_R4_-_786 |
| TSS-REV-1106 | REV | 2710822 | 2    | 2     | 2     | RTS_R4_-_787 |
| TSS-REV-1107 | REV | 2713408 | 14   | 16    | 16    | RTS_R4_-_788 |
| TSS-REV-1108 | REV | 2714490 | 2    | 75    | 75    | RTS_R4_-_789 |
| TSS-REV-1109 | REV | 2714508 | 10   | 154   | 155   | RTS_R4_-_789 |
| TSS-REV-1110 | REV | 2714523 | 7    | 774   | 781   | RTS_R4_-_789 |
| TSS-REV-1111 | REV | 2714531 | 829  | 11675 | 11722 | RTS_R4_-_789 |
| TSS-REV-1112 | REV | 2714543 | 738  | 2454  | 2461  | RTS_R4_-_789 |
| TSS-REV-1113 | REV | 2716576 | 23   | 25    | 25    | RTS_R4_-_790 |
| TSS-REV-1114 | REV | 2716615 | 30   | 30    | 31    | RTS_R4_-_790 |
| TSS-REV-1115 | REV | 2716630 | 37   | 38    | 38    | RTS_R4_-_790 |
| TSS-REV-1116 | REV | 2723834 | 149  | 149   | 149   | RTS_R4_-_791 |

|              |     |         |      |      |      |              |
|--------------|-----|---------|------|------|------|--------------|
| TSS-REV-1117 | REV | 2724210 | 24   | 187  | 249  | RTS_R4_-_792 |
| TSS-REV-1118 | REV | 2729179 | 562  | 622  | 657  | RTS_R4_-_793 |
| TSS-REV-1119 | REV | 2732227 | 732  | 3548 | 3582 | RTS_R4_-_794 |
| TSS-REV-1120 | REV | 2732315 | 783  | 844  | 1038 | RTS_R4_-_795 |
| TSS-REV-1121 | REV | 2734086 | 539  | 539  | 539  | RTS_R4_-_796 |
| TSS-REV-1122 | REV | 2736563 | 4    | 4    | 4    | RTS_R4_-_797 |
| TSS-REV-1123 | REV | 2739331 | 19   | 19   | 19   | RTS_R4_-_798 |
| TSS-REV-1124 | REV | 2744276 | 3445 | 3463 | 3465 | RTS_R4_-_799 |
| TSS-REV-1125 | REV | 2744314 | 156  | 156  | 156  | RTS_R4_-_799 |
| TSS-REV-1126 | REV | 2745876 | 393  | 394  | 394  | RTS_R4_-_800 |
| TSS-REV-1127 | REV | 2748759 | 105  | 134  | 134  | RTS_R4_-_801 |
| TSS-REV-1128 | REV | 2748769 | 2933 | 3713 | 3716 | RTS_R4_-_801 |
| TSS-REV-1129 | REV | 2752770 | 134  | 135  | 135  | RTS_R4_-_802 |
| TSS-REV-1130 | REV | 2763334 | 45   | 45   | 45   | RTS_R4_-_803 |
| TSS-REV-1131 | REV | 2764225 | 11   | 11   | 11   | RTS_R4_-_804 |
| TSS-REV-1132 | REV | 2769887 | 9    | 9    | 9    | RTS_R4_-_805 |
| TSS-REV-1133 | REV | 2779623 |      | 5    | 10   | RTS_R4_-_807 |
| TSS-REV-1134 | REV | 2783978 | 7    | 7    | 7    | RTS_R4_-_808 |
| TSS-REV-1135 | REV | 2794373 | 5    | 9    | 49   | RTS_R4_-_809 |
| TSS-REV-1136 | REV | 2794835 | 267  | 272  | 362  | RTS_R4_-_810 |
| TSS-REV-1137 | REV | 2795088 | 218  | 218  | 225  | RTS_R4_-_811 |
| TSS-REV-1138 | REV | 2795098 | 60   | 61   | 63   | RTS_R4_-_811 |
| TSS-REV-1139 | REV | 2795107 | 75   | 76   | 80   | RTS_R4_-_811 |
| TSS-REV-1140 | REV | 2796550 | 230  | 230  | 230  | RTS_R4_-_812 |
| TSS-REV-1141 | REV | 2796559 | 304  | 315  | 315  | RTS_R4_-_812 |
| TSS-REV-1142 | REV | 2796579 | 35   | 37   | 37   | RTS_R4_-_812 |
| TSS-REV-1143 | REV | 2796599 | 6    | 6    | 6    | RTS_R4_-_812 |
| TSS-REV-1144 | REV | 2798154 | 35   | 35   | 35   | RTS_R4_-_813 |
| TSS-REV-1145 | REV | 2798693 | 19   | 19   | 19   | RTS_R4_-_814 |
| TSS-REV-1146 | REV | 2807603 | 9    | 9    | 12   | RTS_R4_-_815 |
| TSS-REV-1147 | REV | 2812784 | 78   | 78   | 78   | RTS_R4_-_817 |
| TSS-REV-1148 | REV | 2812837 | 798  | 818  | 840  | RTS_R4_-_817 |
| TSS-REV-1149 | REV | 2812900 | 380  | 381  | 381  | RTS_R4_-_817 |
| TSS-REV-1150 | REV | 2814612 | 456  | 456  | 456  | RTS_R4_-_818 |
| TSS-REV-1151 | REV | 2815550 | 24   | 25   | 26   | RTS_R4_-_819 |
| TSS-REV-1152 | REV | 2815942 | 160  | 160  | 160  | RTS_R4_-_820 |
| TSS-REV-1153 | REV | 2816357 | 83   | 83   | 83   | RTS_R4_-_822 |
| TSS-REV-1154 | REV | 2816667 | 5838 | 7095 | 7736 | RTS_R4_-_823 |
| TSS-REV-1155 | REV | 2817211 | 707  | 717  | 717  | RTS_R4_-_824 |
| TSS-REV-1156 | REV | 2817220 | 788  | 788  | 790  | RTS_R4_-_824 |
| TSS-REV-1157 | REV | 2817295 | 429  | 429  | 447  | RTS_R4_-_824 |
| TSS-REV-1158 | REV | 2820046 | 113  | 113  | 113  | RTS_R4_-_825 |
| TSS-REV-1159 | REV | 2820060 | 63   | 63   | 63   | RTS_R4_-_825 |
| TSS-REV-1160 | REV | 2820112 | 3060 | 3061 | 3061 | RTS_R4_-_825 |
| TSS-REV-1161 | REV | 2821830 | 185  | 187  | 187  | RTS_R4_-_826 |
| TSS-REV-1162 | REV | 2821834 | 187  | 187  | 187  | RTS_R4_-_826 |
| TSS-REV-1163 | REV | 2821840 | 226  | 229  | 231  | RTS_R4_-_826 |
| TSS-REV-1164 | REV | 2821878 | 140  | 140  | 140  | RTS_R4_-_826 |
| TSS-REV-1165 | REV | 2822395 | 146  | 146  | 146  | RTS_R4_-_827 |
| TSS-REV-1166 | REV | 2823564 | 23   | 23   | 25   | RTS_R4_-_828 |
| TSS-REV-1167 | REV | 2830332 | 31   | 31   | 31   | RTS_R4_-_829 |
| TSS-REV-1168 | REV | 2835567 |      | 1    | 4    | RTS_R4_-_830 |
| TSS-REV-1169 | REV | 2837310 | 16   | 17   | 17   | RTS_R4_-_831 |
| TSS-REV-1170 | REV | 2841124 | 103  | 105  | 106  | RTS_R4_-_832 |
| TSS-REV-1171 | REV | 2854922 |      |      | 1    | RTS_R4_-_833 |
| TSS-REV-1172 | REV | 2859278 | 279  | 283  | 311  | RTS_R4_-_834 |
| TSS-REV-1173 | REV | 2866141 | 219  | 221  | 223  | RTS_R4_-_835 |
| TSS-REV-1174 | REV | 2866803 | 17   | 17   | 17   | RTS_R4_-_836 |
| TSS-REV-1175 | REV | 2868608 | 8    | 8    | 8    | RTS_R4_-_837 |
| TSS-REV-1176 | REV | 2868673 | 13   | 13   | 13   | RTS_R4_-_837 |
| TSS-REV-1177 | REV | 2870979 | 21   | 21   | 23   | RTS_R4_-_838 |
| TSS-REV-1178 | REV | 2874392 | 682  | 683  | 683  | RTS_R4_-_840 |
| TSS-REV-1179 | REV | 2876455 | 7    | 7    | 8    | RTS_R4_-_841 |

|              |     |         |      |       |       |              |
|--------------|-----|---------|------|-------|-------|--------------|
| TSS-REV-1180 | REV | 2878363 | 2    | 2     | 2     | RTS_R4_-_843 |
| TSS-REV-1181 | REV | 2878413 | 2    | 2     | 2     | RTS_R4_-_843 |
| TSS-REV-1182 | REV | 2878903 | 2    | 2     | 2     | RTS_R4_-_844 |
| TSS-REV-1183 | REV | 2884174 | 2    | 2     | 2     | RTS_R4_-_845 |
| TSS-REV-1184 | REV | 2889945 | 246  | 246   | 246   | RTS_R4_-_847 |
| TSS-REV-1185 | REV | 2889976 | 208  | 208   | 208   | RTS_R4_-_847 |
| TSS-REV-1186 | REV | 2889985 | 910  | 910   | 910   | RTS_R4_-_847 |
| TSS-REV-1187 | REV | 2902483 | 14   | 21    | 25    | RTS_R4_-_849 |
| TSS-REV-1188 | REV | 2903464 | 19   | 22    | 25    | RTS_R4_-_850 |
| TSS-REV-1189 | REV | 2905978 | 357  | 378   | 379   | RTS_R4_-_851 |
| TSS-REV-1190 | REV | 2905988 | 108  | 108   | 108   | RTS_R4_-_851 |
| TSS-REV-1191 | REV | 2906041 | 6917 | 6966  | 6972  | RTS_R4_-_851 |
| TSS-REV-1192 | REV | 2906123 | 166  | 168   | 168   | RTS_R4_-_851 |
| TSS-REV-1193 | REV | 2906149 | 186  | 186   | 187   | RTS_R4_-_851 |
| TSS-REV-1194 | REV | 2906248 | 248  | 254   | 255   | RTS_R4_-_851 |
| TSS-REV-1195 | REV | 2907728 | 105  | 105   | 105   | RTS_R4_-_852 |
| TSS-REV-1196 | REV | 2909279 | 81   | 81    | 81    | RTS_R4_-_853 |
| TSS-REV-1197 | REV | 2909390 | 52   | 54    | 56    | RTS_R4_-_853 |
| TSS-REV-1198 | REV | 2911869 | 25   | 25    | 25    | RTS_R4_-_854 |
| TSS-REV-1199 | REV | 2912027 | 32   | 32    | 32    | RTS_R4_-_854 |
| TSS-REV-1200 | REV | 2913051 | 101  | 101   | 101   | RTS_R4_-_855 |
| TSS-REV-1201 | REV | 2922159 | 198  | 198   | 198   | RTS_R4_-_857 |
| TSS-REV-1202 | REV | 2922546 | 284  | 311   | 382   | RTS_R4_-_858 |
| TSS-REV-1203 | REV | 2922556 | 157  | 164   | 164   | RTS_R4_-_858 |
| TSS-REV-1204 | REV | 2923335 | 270  | 272   | 273   | RTS_R4_-_859 |
| TSS-REV-1205 | REV | 2939689 | 103  | 107   | 118   | RTS_R4_-_861 |
| TSS-REV-1206 | REV | 2939796 | 74   | 74    | 74    | RTS_R4_-_861 |
| TSS-REV-1207 | REV | 2940661 | 95   | 95    | 95    | RTS_R4_-_862 |
| TSS-REV-1208 | REV | 2941194 | 66   | 72    | 77    | RTS_R4_-_863 |
| TSS-REV-1209 | REV | 2941235 | 171  | 174   | 179   | RTS_R4_-_863 |
| TSS-REV-1210 | REV | 2944074 | 51   | 51    | 53    | RTS_R4_-_864 |
| TSS-REV-1211 | REV | 2944085 | 69   | 69    | 69    | RTS_R4_-_864 |
| TSS-REV-1212 | REV | 2944096 | 65   | 65    | 65    | RTS_R4_-_864 |
| TSS-REV-1213 | REV | 2944175 | 51   | 51    | 51    | RTS_R4_-_864 |
| TSS-REV-1214 | REV | 2945225 | 26   | 26    | 26    | RTS_R4_-_865 |
| TSS-REV-1215 | REV | 2947086 | 162  | 163   | 163   | RTS_R4_-_866 |
| TSS-REV-1216 | REV | 2953935 | 67   | 67    | 67    | RTS_R4_-_867 |
| TSS-REV-1217 | REV | 2954000 | 49   | 50    | 50    | RTS_R4_-_867 |
| TSS-REV-1218 | REV | 2957031 | 10   | 11    | 11    | RTS_R4_-_868 |
| TSS-REV-1219 | REV | 2962199 | 1    | 1     | 1     | RTS_R4_-_870 |
| TSS-REV-1220 | REV | 2964139 | 50   | 50    | 50    | RTS_R4_-_871 |
| TSS-REV-1221 | REV | 2967018 | 167  | 167   | 167   | RTS_R4_-_872 |
| TSS-REV-1222 | REV | 2972534 | 3    | 3     | 3     | RTS_R4_-_873 |
| TSS-REV-1223 | REV | 2972645 | 4    | 4     | 4     | RTS_R4_-_873 |
| TSS-REV-1224 | REV | 2974072 | 78   | 79    | 79    | RTS_R4_-_874 |
| TSS-REV-1225 | REV | 2974189 | 12   | 13    | 37    | RTS_R4_-_875 |
| TSS-REV-1226 | REV | 2974407 | 3    | 4     | 6     | RTS_R4_-_876 |
| TSS-REV-1227 | REV | 2976947 | 334  | 334   | 334   | RTS_R4_-_877 |
| TSS-REV-1228 | REV | 2980232 | 13   | 13    | 14    | RTS_R4_-_878 |
| TSS-REV-1229 | REV | 2983635 | 95   | 96    | 98    | RTS_R4_-_880 |
| TSS-REV-1230 | REV | 2995918 | 4    | 4     | 4     | RTS_R4_-_881 |
| TSS-REV-1231 | REV | 2997079 | 1993 | 34233 | 83110 | RTS_R4_-_883 |
| TSS-REV-1232 | REV | 2998266 | 12   | 12    | 14    | RTS_R4_-_884 |
| TSS-REV-1233 | REV | 3003869 |      |       | 3     | RTS_R4_-_885 |
| TSS-REV-1234 | REV | 3013059 | 2    | 2     | 2     | RTS_R4_-_886 |
| TSS-REV-1235 | REV | 3023597 | 5    | 5     | 5     | RTS_R4_-_888 |
| TSS-REV-1236 | REV | 3023627 | 3    | 3     | 3     | RTS_R4_-_888 |
| TSS-REV-1237 | REV | 3034313 | 97   | 98    | 98    | RTS_R4_-_890 |
| TSS-REV-1238 | REV | 3034336 | 212  | 214   | 214   | RTS_R4_-_890 |
| TSS-REV-1239 | REV | 3034346 | 322  | 322   | 322   | RTS_R4_-_890 |
| TSS-REV-1240 | REV | 3037790 | 14   | 14    | 14    | RTS_R4_-_891 |
| TSS-REV-1241 | REV | 3037800 | 11   | 11    | 11    | RTS_R4_-_891 |
| TSS-REV-1242 | REV | 3039121 | 70   | 72    | 73    | RTS_R4_-_892 |



|              |     |         |      |      |      |              |
|--------------|-----|---------|------|------|------|--------------|
| TSS-REV-1243 | REV | 3041333 | 9    | 9    | 9    | RTS_R4_-_893 |
| TSS-REV-1244 | REV | 3041676 | 448  | 450  | 450  | RTS_R4_-_894 |
| TSS-REV-1245 | REV | 3047178 | 117  | 117  | 117  | RTS_R4_-_896 |
| TSS-REV-1246 | REV | 3048789 | 62   | 62   | 62   | RTS_R4_-_897 |
| TSS-REV-1247 | REV | 3048798 | 283  | 283  | 283  | RTS_R4_-_897 |
| TSS-REV-1248 | REV | 3053495 | 196  | 196  | 196  | RTS_R4_-_898 |
| TSS-REV-1249 | REV | 3056477 | 47   | 55   | 57   | RTS_R4_-_899 |
| TSS-REV-1250 | REV | 3057375 | 312  | 315  | 317  | RTS_R4_-_900 |
| TSS-REV-1251 | REV | 3066137 | 55   | 56   | 61   | RTS_R4_-_901 |
| TSS-REV-1252 | REV | 3066148 | 640  | 654  | 680  | RTS_R4_-_901 |
| TSS-REV-1253 | REV | 3066858 | 7    | 7    | 7    | RTS_R4_-_902 |
| TSS-REV-1254 | REV | 3067836 | 114  | 114  | 114  | RTS_R4_-_903 |
| TSS-REV-1255 | REV | 3067856 | 151  | 151  | 151  | RTS_R4_-_903 |
| TSS-REV-1256 | REV | 3067893 | 640  | 669  | 670  | RTS_R4_-_903 |
| TSS-REV-1257 | REV | 3069449 | 196  | 196  | 196  | RTS_R4_-_904 |
| TSS-REV-1258 | REV | 3069477 | 576  | 576  | 576  | RTS_R4_-_904 |
| TSS-REV-1259 | REV | 3070670 | 248  | 249  | 250  | RTS_R4_-_905 |
| TSS-REV-1260 | REV | 3070703 | 2052 | 2065 | 2065 | RTS_R4_-_905 |
| TSS-REV-1261 | REV | 3070757 | 367  | 370  | 370  | RTS_R4_-_905 |
| TSS-REV-1262 | REV | 3071845 | 199  | 200  | 200  | RTS_R4_-_906 |
| TSS-REV-1263 | REV | 3073487 | 1    | 1    | 2    | RTS_R4_-_907 |
| TSS-REV-1264 | REV | 3079737 | 788  | 788  | 788  | RTS_R4_-_908 |
| TSS-REV-1265 | REV | 3081893 | 254  | 254  | 254  | RTS_R4_-_909 |
| TSS-REV-1266 | REV | 3081908 | 256  | 256  | 256  | RTS_R4_-_909 |
| TSS-REV-1267 | REV | 3081948 | 80   | 80   | 84   | RTS_R4_-_909 |
| TSS-REV-1268 | REV | 3081968 | 43   | 49   | 180  | RTS_R4_-_909 |
| TSS-REV-1269 | REV | 3081990 | 115  | 116  | 155  | RTS_R4_-_909 |
| TSS-REV-1270 | REV | 3083950 | 33   | 33   | 34   | RTS_R4_-_910 |
| TSS-REV-1271 | REV | 3084078 | 32   | 32   | 32   | RTS_R4_-_910 |
| TSS-REV-1272 | REV | 3084420 | 22   | 22   | 22   | RTS_R4_-_911 |
| TSS-REV-1273 | REV | 3093107 | 13   | 14   | 15   |              |
| TSS-REV-1274 | REV | 3099822 | 47   | 48   | 50   | RTS_R4_-_913 |
| TSS-REV-1275 | REV | 3100179 | 114  | 115  | 115  | RTS_R4_-_914 |
| TSS-REV-1276 | REV | 3100215 | 420  | 423  | 425  | RTS_R4_-_914 |
| TSS-REV-1277 | REV | 3100221 | 5472 | 5545 | 5565 | RTS_R4_-_914 |
| TSS-REV-1278 | REV | 3100257 | 482  | 493  | 497  | RTS_R4_-_914 |
| TSS-REV-1279 | REV | 3100324 | 136  | 136  | 136  | RTS_R4_-_914 |
| TSS-REV-1280 | REV | 3101025 | 32   | 32   | 32   | RTS_R4_-_915 |
| TSS-REV-1281 | REV | 3107281 | 35   | 37   | 37   | RTS_R4_-_916 |
| TSS-REV-1282 | REV | 3107308 | 62   | 62   | 62   | RTS_R4_-_916 |
| TSS-REV-1283 | REV | 3111057 | 4    | 4    | 4    | RTS_R4_-_917 |
| TSS-REV-1284 | REV | 3111570 | 62   | 62   | 62   | RTS_R4_-_918 |
| TSS-REV-1285 | REV | 3111770 | 9    | 9    | 9    | RTS_R4_-_918 |
| TSS-REV-1286 | REV | 3111918 | 7    | 7    | 7    | RTS_R4_-_918 |
| TSS-REV-1287 | REV | 3117349 | 58   | 58   | 58   | RTS_R4_-_919 |
| TSS-REV-1288 | REV | 3117362 | 267  | 267  | 267  | RTS_R4_-_919 |
| TSS-REV-1289 | REV | 3119364 | 9    | 9    | 9    | RTS_R4_-_920 |
| TSS-REV-1290 | REV | 3122752 | 3    | 3    | 3    | RTS_R4_-_921 |
| TSS-REV-1291 | REV | 3122796 | 4    | 4    | 4    | RTS_R4_-_921 |
| TSS-REV-1292 | REV | 3126098 | 2    | 2    | 4    | RTS_R4_-_922 |
| TSS-REV-1293 | REV | 3126195 | 3    | 3    | 3    | RTS_R4_-_922 |
| TSS-REV-1294 | REV | 3136551 | 17   | 17   | 17   | RTS_R4_-_923 |
| TSS-REV-1295 | REV | 3141054 | 6    | 6    | 6    | RTS_R4_-_924 |
| TSS-REV-1296 | REV | 3141126 | 7    | 7    | 7    | RTS_R4_-_924 |
| TSS-REV-1297 | REV | 3144309 | 17   | 20   | 20   | RTS_R4_-_925 |
| TSS-REV-1298 | REV | 3144385 | 13   | 13   | 13   | RTS_R4_-_925 |
| TSS-REV-1299 | REV | 3144780 | 2    | 2    | 2    | RTS_R4_-_926 |
| TSS-REV-1300 | REV | 3145787 | 9    | 10   | 15   | RTS_R4_-_927 |
| TSS-REV-1301 | REV | 3147518 | 105  | 109  | 109  | RTS_R4_-_928 |
| TSS-REV-1302 | REV | 3150038 | 410  | 410  | 419  | RTS_R4_-_929 |
| TSS-REV-1303 | REV | 3153212 |      | 2    | 3    | RTS_R4_-_930 |
| TSS-REV-1304 | REV | 3159202 | 33   | 33   | 33   | RTS_R4_-_932 |
| TSS-REV-1305 | REV | 3160708 | 31   | 32   | 32   | RTS_R4_-_933 |

|              |     |         |      |      |      |              |
|--------------|-----|---------|------|------|------|--------------|
| TSS-REV-1306 | REV | 3160864 | 53   | 53   | 53   | RTS_R4_-_933 |
| TSS-REV-1307 | REV | 3161587 | 17   | 18   | 18   | RTS_R4_-_934 |
| TSS-REV-1308 | REV | 3164043 | 533  | 535  | 535  | RTS_R4_-_935 |
| TSS-REV-1309 | REV | 3166584 | 7    | 10   | 14   | RTS_R4_-_936 |
| TSS-REV-1310 | REV | 3167731 | 19   | 34   | 131  | RTS_R4_-_937 |
| TSS-REV-1311 | REV | 3173667 | 267  | 268  | 268  | RTS_R4_-_938 |
| TSS-REV-1312 | REV | 3174987 | 18   | 18   | 24   | RTS_R4_-_939 |
| TSS-REV-1313 | REV | 3176014 | 39   | 40   | 40   | RTS_R4_-_940 |
| TSS-REV-1314 | REV | 3180462 | 7    | 7    | 7    | RTS_R4_-_941 |
| TSS-REV-1315 | REV | 3181662 | 18   | 18   | 18   | RTS_R4_-_942 |
| TSS-REV-1316 | REV | 3181669 | 24   | 24   | 24   | RTS_R4_-_942 |
| TSS-REV-1317 | REV | 3181678 | 23   | 23   | 23   | RTS_R4_-_942 |
| TSS-REV-1318 | REV | 3182740 | 9    | 9    | 9    | RTS_R4_-_943 |
| TSS-REV-1319 | REV | 3189979 | 5    | 8    | 49   | RTS_R4_-_945 |
| TSS-REV-1320 | REV | 3189986 | 15   | 25   | 147  | RTS_R4_-_945 |
| TSS-REV-1321 | REV | 3189995 | 28   | 32   | 158  | RTS_R4_-_945 |
| TSS-REV-1322 | REV | 3190002 | 43   | 54   | 181  | RTS_R4_-_945 |
| TSS-REV-1323 | REV | 3190011 | 105  | 113  | 126  | RTS_R4_-_945 |
| TSS-REV-1324 | REV | 3190024 | 270  | 289  | 343  | RTS_R4_-_945 |
| TSS-REV-1325 | REV | 3190379 | 4    | 4    | 4    | RTS_R4_-_946 |
| TSS-REV-1326 | REV | 3192887 | 10   | 11   | 11   | RTS_R4_-_947 |
| TSS-REV-1327 | REV | 3193271 | 47   | 48   | 48   | RTS_R4_-_948 |
| TSS-REV-1328 | REV | 3194803 | 99   | 99   | 99   | RTS_R4_-_949 |
| TSS-REV-1329 | REV | 3199054 | 74   | 75   | 75   | RTS_R4_-_950 |
| TSS-REV-1330 | REV | 3202205 | 34   | 34   | 34   | RTS_R4_-_951 |
| TSS-REV-1331 | REV | 3202243 | 53   | 53   | 53   | RTS_R4_-_951 |
| TSS-REV-1332 | REV | 3202659 | 72   | 73   | 73   | RTS_R4_-_952 |
| TSS-REV-1333 | REV | 3204386 | 6    | 6    | 6    | RTS_R4_-_953 |
| TSS-REV-1334 | REV | 3208588 | 284  | 287  | 287  | RTS_R4_-_954 |
| TSS-REV-1335 | REV | 3213518 | 6    | 6    | 8    | RTS_R4_-_955 |
| TSS-REV-1336 | REV | 3213543 | 11   | 11   | 11   | RTS_R4_-_955 |
| TSS-REV-1337 | REV | 3214559 | 491  | 491  | 491  | RTS_R4_-_956 |
| TSS-REV-1338 | REV | 3217140 | 24   | 24   | 24   | RTS_R4_-_957 |
| TSS-REV-1339 | REV | 3232782 | 16   | 18   | 23   | RTS_R4_-_958 |
| TSS-REV-1340 | REV | 3233919 |      | 1    | 1    | RTS_R4_-_959 |
| TSS-REV-1341 | REV | 3242809 | 60   | 74   | 75   | RTS_R4_-_960 |
| TSS-REV-1342 | REV | 3252264 | 44   | 46   | 46   | RTS_R4_-_961 |
| TSS-REV-1343 | REV | 3256371 | 180  | 204  | 237  | RTS_R4_-_962 |
| TSS-REV-1344 | REV | 3268614 | 1    | 34   | 47   | RTS_R4_-_963 |
| TSS-REV-1345 | REV | 3276727 | 65   | 65   | 65   | RTS_R4_-_965 |
| TSS-REV-1346 | REV | 3287928 |      |      | 3    | RTS_R4_-_966 |
| TSS-REV-1347 | REV | 3292525 | 1    | 2    | 7    | RTS_R4_-_968 |
| TSS-REV-1348 | REV | 3296934 | 2    | 4    | 7    | RTS_R4_-_969 |
| TSS-REV-1349 | REV | 3297958 | 7    | 7    | 7    | RTS_R4_-_970 |
| TSS-REV-1350 | REV | 3299323 | 104  | 149  | 153  | RTS_R4_-_971 |
| TSS-REV-1351 | REV | 3299434 | 58   | 58   | 58   | RTS_R4_-_971 |
| TSS-REV-1352 | REV | 3303882 | 17   | 17   | 17   | RTS_R4_-_972 |
| TSS-REV-1353 | REV | 3306034 | 179  | 182  | 182  | RTS_R4_-_973 |
| TSS-REV-1354 | REV | 3307126 | 26   | 26   | 27   | RTS_R4_-_974 |
| TSS-REV-1355 | REV | 3309271 | 5083 | 5099 | 5104 | RTS_R4_-_975 |
| TSS-REV-1356 | REV | 3309309 | 134  | 134  | 134  | RTS_R4_-_975 |
| TSS-REV-1357 | REV | 3309768 | 123  | 127  | 127  | RTS_R4_-_976 |
| TSS-REV-1358 | REV | 3309806 | 291  | 294  | 294  | RTS_R4_-_976 |
| TSS-REV-1359 | REV | 3311247 | 84   | 84   | 84   | RTS_R4_-_977 |
| TSS-REV-1360 | REV | 3316071 | 131  | 131  | 131  | RTS_R4_-_978 |
| TSS-REV-1361 | REV | 3316119 | 205  | 206  | 206  | RTS_R4_-_978 |
| TSS-REV-1362 | REV | 3316211 | 76   | 78   | 78   | RTS_R4_-_978 |
| TSS-REV-1363 | REV | 3316311 | 953  | 1045 | 1143 | RTS_R4_-_979 |
| TSS-REV-1364 | REV | 3316397 | 149  | 154  | 155  | RTS_R4_-_979 |
| TSS-REV-1365 | REV | 3320611 | 48   | 70   | 70   | RTS_R4_-_980 |
| TSS-REV-1366 | REV | 3322307 | 73   | 74   | 74   | RTS_R4_-_981 |
| TSS-REV-1367 | REV | 3322347 | 101  | 101  | 101  | RTS_R4_-_981 |
| TSS-REV-1368 | REV | 3323252 | 243  | 244  | 244  | RTS_R4_-_982 |

|              |     |         |      |      |      |               |
|--------------|-----|---------|------|------|------|---------------|
| TSS-REV-1369 | REV | 3323526 | 162  | 168  | 168  | RTS_R4_-_982  |
| TSS-REV-1370 | REV | 3325000 | 248  | 249  | 249  | RTS_R4_-_983  |
| TSS-REV-1371 | REV | 3325753 | 125  | 140  | 147  | RTS_R4_-_984  |
| TSS-REV-1372 | REV | 3326835 | 65   | 65   | 65   | RTS_R4_-_985  |
| TSS-REV-1373 | REV | 3326874 | 77   | 78   | 78   | RTS_R4_-_985  |
| TSS-REV-1374 | REV | 3330183 | 81   | 81   | 81   | RTS_R4_-_986  |
| TSS-REV-1375 | REV | 3330932 | 137  | 138  | 139  | RTS_R4_-_987  |
| TSS-REV-1376 | REV | 3331479 | 399  | 401  | 401  | RTS_R4_-_988  |
| TSS-REV-1377 | REV | 3331529 | 782  | 790  | 790  | RTS_R4_-_988  |
| TSS-REV-1378 | REV | 3331538 | 1516 | 1596 | 1597 | RTS_R4_-_988  |
| TSS-REV-1379 | REV | 3334539 | 152  | 157  | 158  | RTS_R4_-_989  |
| TSS-REV-1380 | REV | 3334577 | 633  | 636  | 636  | RTS_R4_-_989  |
| TSS-REV-1381 | REV | 3334854 | 448  | 450  | 450  | RTS_R4_-_990  |
| TSS-REV-1382 | REV | 3336077 | 56   | 56   | 56   | RTS_R4_-_991  |
| TSS-REV-1383 | REV | 3336084 | 40   | 40   | 40   | RTS_R4_-_991  |
| TSS-REV-1384 | REV | 3338123 | 83   | 84   | 84   | RTS_R4_-_992  |
| TSS-REV-1385 | REV | 3338154 | 50   | 52   | 52   | RTS_R4_-_992  |
| TSS-REV-1386 | REV | 3348510 | 88   | 89   | 89   | RTS_R4_-_993  |
| TSS-REV-1387 | REV | 3348532 | 105  | 106  | 106  | RTS_R4_-_993  |
| TSS-REV-1388 | REV | 3348571 | 71   | 71   | 72   | RTS_R4_-_993  |
| TSS-REV-1389 | REV | 3351071 | 10   | 11   | 13   | RTS_R4_-_994  |
| TSS-REV-1390 | REV | 3352167 | 5    | 5    | 5    | RTS_R4_-_995  |
| TSS-REV-1391 | REV | 3358901 | 3    | 3    | 3    | RTS_R4_-_996  |
| TSS-REV-1392 | REV | 3365791 | 6    | 6    | 27   | RTS_R4_-_998  |
| TSS-REV-1393 | REV | 3371642 | 20   | 26   | 28   | RTS_R4_-_999  |
| TSS-REV-1394 | REV | 3372540 | 18   | 19   | 19   | RTS_R4_-_1000 |
| TSS-REV-1395 | REV | 3375467 | 124  | 125  | 125  | RTS_R4_-_1001 |
| TSS-REV-1396 | REV | 3375504 | 172  | 173  | 174  | RTS_R4_-_1001 |
| TSS-REV-1397 | REV | 3375587 | 683  | 683  | 683  | RTS_R4_-_1001 |
| TSS-REV-1398 | REV | 3376678 | 188  | 188  | 188  | RTS_R4_-_1002 |
| TSS-REV-1399 | REV | 3376692 | 95   | 97   | 98   | RTS_R4_-_1002 |
| TSS-REV-1400 | REV | 3376796 | 518  | 520  | 521  | RTS_R4_-_1002 |
| TSS-REV-1401 | REV | 3376830 | 55   | 57   | 57   | RTS_R4_-_1002 |
| TSS-REV-1402 | REV | 3378033 | 6    | 7    | 7    | RTS_R4_-_1003 |
| TSS-REV-1403 | REV | 3378078 | 5    | 5    | 5    | RTS_R4_-_1003 |
| TSS-REV-1404 | REV | 3382316 | 616  | 618  | 619  | RTS_R4_-_1004 |
| TSS-REV-1405 | REV | 3382336 | 94   | 97   | 98   | RTS_R4_-_1004 |
| TSS-REV-1406 | REV | 3382494 | 3469 | 3478 | 3555 | RTS_R4_-_1004 |
| TSS-REV-1407 | REV | 3384191 | 1    | 1    | 12   | RTS_R4_-_1005 |
| TSS-REV-1408 | REV | 3387503 | 9    | 9    | 9    | RTS_R4_-_1006 |
| TSS-REV-1409 | REV | 3390086 | 51   | 51   | 51   | RTS_R4_-_1007 |
| TSS-REV-1410 | REV | 3390139 | 53   | 53   | 53   | RTS_R4_-_1007 |
| TSS-REV-1411 | REV | 3390443 | 30   | 30   | 30   | RTS_R4_-_1007 |
| TSS-REV-1412 | REV | 3390673 | 50   | 50   | 50   | RTS_R4_-_1007 |
| TSS-REV-1413 | REV | 3395947 | 38   | 42   | 42   | RTS_R4_-_1008 |
| TSS-REV-1414 | REV | 3396009 | 37   | 37   | 37   | RTS_R4_-_1008 |
| TSS-REV-1415 | REV | 3396618 | 63   | 63   | 63   | RTS_R4_-_1009 |
| TSS-REV-1416 | REV | 3396643 | 42   | 42   | 42   | RTS_R4_-_1009 |
| TSS-REV-1417 | REV | 3399149 | 131  | 132  | 132  | RTS_R4_-_1010 |
| TSS-REV-1418 | REV | 3399214 | 816  | 816  | 816  | RTS_R4_-_1010 |
| TSS-REV-1419 | REV | 3401381 | 7    | 7    | 7    | RTS_R4_-_1011 |
| TSS-REV-1420 | REV | 3408239 |      |      | 2    | RTS_R4_-_1012 |
| TSS-REV-1421 | REV | 3427033 | 33   | 37   | 37   | RTS_R4_-_1013 |
| TSS-REV-1422 | REV | 3427071 | 22   | 23   | 23   | RTS_R4_-_1013 |
| TSS-REV-1423 | REV | 3429107 | 23   | 24   | 24   | RTS_R4_-_1014 |
| TSS-REV-1424 | REV | 3430049 | 46   | 46   | 47   | RTS_R4_-_1015 |
| TSS-REV-1425 | REV | 3430625 | 5    | 6    | 12   | RTS_R4_-_1016 |
| TSS-REV-1426 | REV | 3431625 | 12   | 12   | 12   | RTS_R4_-_1017 |
| TSS-REV-1427 | REV | 3437566 | 6    | 8    | 8    | RTS_R4_-_1018 |
| TSS-REV-1428 | REV | 3440574 | 1194 | 1194 | 1194 | RTS_R4_-_1019 |
| TSS-REV-1429 | REV | 3440580 | 3033 | 3033 | 3034 | RTS_R4_-_1019 |
| TSS-REV-1430 | REV | 3440584 | 2774 | 2778 | 2778 | RTS_R4_-_1019 |
| TSS-REV-1431 | REV | 3440615 | 2226 | 2226 | 2226 | RTS_R4_-_1019 |

|              |     |         |       |       |       |               |
|--------------|-----|---------|-------|-------|-------|---------------|
| TSS-REV-1432 | REV | 3440622 | 1303  | 1304  | 1304  | RTS_R4_-_1019 |
| TSS-REV-1433 | REV | 3440636 | 316   | 316   | 316   | RTS_R4_-_1019 |
| TSS-REV-1434 | REV | 3446318 | 620   | 620   | 620   | RTS_R4_-_1020 |
| TSS-REV-1435 | REV | 3446323 | 756   | 758   | 758   | RTS_R4_-_1020 |
| TSS-REV-1436 | REV | 3446364 | 718   | 723   | 724   | RTS_R4_-_1020 |
| TSS-REV-1437 | REV | 3451312 | 294   | 295   | 295   | RTS_R4_-_1021 |
| TSS-REV-1438 | REV | 3451985 | 2     | 2     | 2     | RTS_R4_-_1022 |
| TSS-REV-1439 | REV | 3464770 | 2284  | 2298  | 2339  | RTS_R4_-_1023 |
| TSS-REV-1440 | REV | 3465032 | 187   | 187   | 193   | RTS_R4_-_1024 |
| TSS-REV-1441 | REV | 3469359 | 2310  | 2320  | 2324  | RTS_R4_-_1026 |
| TSS-REV-1442 | REV | 3469402 | 56495 | 56547 | 56563 | RTS_R4_-_1026 |
| TSS-REV-1443 | REV | 3469412 | 507   | 510   | 512   | RTS_R4_-_1026 |
| TSS-REV-1444 | REV | 3469419 | 109   | 112   | 112   | RTS_R4_-_1026 |
| TSS-REV-1445 | REV | 3469443 | 3901  | 3911  | 3911  | RTS_R4_-_1026 |
| TSS-REV-1446 | REV | 3472640 | 615   | 617   | 617   | RTS_R4_-_1027 |
| TSS-REV-1447 | REV | 3472650 | 1000  | 1026  | 1027  | RTS_R4_-_1027 |
| TSS-REV-1448 | REV | 3474466 | 20    | 20    | 20    | RTS_R4_-_1028 |
| TSS-REV-1449 | REV | 3474524 | 12    | 12    | 12    | RTS_R4_-_1028 |
| TSS-REV-1450 | REV | 3474563 | 9     | 10    | 14    | RTS_R4_-_1028 |
| TSS-REV-1451 | REV | 3475488 | 100   | 100   | 100   | RTS_R4_-_1029 |
| TSS-REV-1452 | REV | 3475547 | 63    | 63    | 65    | RTS_R4_-_1029 |
| TSS-REV-1453 | REV | 3476403 | 45    | 46    | 48    | RTS_R4_-_1030 |
| TSS-REV-1454 | REV | 3476580 | 45    | 45    | 50    | RTS_R4_-_1030 |
| TSS-REV-1455 | REV | 3479273 | 11    | 11    | 11    | RTS_R4_-_1031 |
| TSS-REV-1456 | REV | 3483867 | 69    | 69    | 69    | RTS_R4_-_1032 |
| TSS-REV-1457 | REV | 3483974 | 3     | 3     | 6     | RTS_R4_-_1032 |
| TSS-REV-1458 | REV | 3488232 | 394   | 401   | 401   | RTS_R4_-_1033 |
| TSS-REV-1459 | REV | 3488243 | 726   | 738   | 738   | RTS_R4_-_1033 |
| TSS-REV-1460 | REV | 3489670 | 136   | 136   | 136   | RTS_R4_-_1034 |
| TSS-REV-1461 | REV | 3490351 | 60    | 60    | 60    | RTS_R4_-_1035 |
| TSS-REV-1462 | REV | 3490357 | 36    | 36    | 36    | RTS_R4_-_1035 |
| TSS-REV-1463 | REV | 3490712 | 6     | 6     | 6     | RTS_R4_-_1036 |
| TSS-REV-1464 | REV | 3510372 | 14    | 34    | 36    | RTS_R4_-_1037 |
| TSS-REV-1465 | REV | 3510389 | 19    | 26    | 26    | RTS_R4_-_1037 |
| TSS-REV-1466 | REV | 3511720 | 419   | 420   | 420   | RTS_R4_-_1038 |
| TSS-REV-1467 | REV | 3511773 | 285   | 285   | 285   | RTS_R4_-_1038 |
| TSS-REV-1468 | REV | 3513213 | 106   | 106   | 106   | RTS_R4_-_1039 |
| TSS-REV-1469 | REV | 3514323 | 32    | 32    | 32    | RTS_R4_-_1040 |
| TSS-REV-1470 | REV | 3515537 | 105   | 105   | 106   | RTS_R4_-_1041 |
| TSS-REV-1471 | REV | 3517188 | 46    | 50    | 50    | RTS_R4_-_1042 |
| TSS-REV-1472 | REV | 3517403 | 69    | 69    | 69    | RTS_R4_-_1042 |
| TSS-REV-1473 | REV | 3520825 | 5     | 5     | 5     | RTS_R4_-_1043 |
| TSS-REV-1474 | REV | 3524195 | 95    | 95    | 95    | RTS_R4_-_1044 |
| TSS-REV-1475 | REV | 3524254 | 151   | 152   | 152   | RTS_R4_-_1044 |
| TSS-REV-1476 | REV | 3524265 | 153   | 153   | 153   | RTS_R4_-_1044 |
| TSS-REV-1477 | REV | 3530485 | 4     | 4     | 4     | RTS_R4_-_1045 |
| TSS-REV-1478 | REV | 3530543 | 3     | 3     | 3     | RTS_R4_-_1045 |
| TSS-REV-1479 | REV | 3534707 | 76    | 80    | 80    | RTS_R4_-_1046 |
| TSS-REV-1480 | REV | 3534729 | 7     | 9     | 17    | RTS_R4_-_1046 |
| TSS-REV-1481 | REV | 3534768 | 30    | 31    | 31    | RTS_R4_-_1046 |
| TSS-REV-1482 | REV | 3542897 | 18    | 27    | 28    | RTS_R4_-_1048 |
| TSS-REV-1483 | REV | 3550532 | 197   | 197   | 197   | RTS_R4_-_1049 |
| TSS-REV-1484 | REV | 3556144 | 20    | 20    | 20    | RTS_R4_-_1050 |
| TSS-REV-1485 | REV | 3556160 | 12    | 12    | 12    | RTS_R4_-_1050 |
| TSS-REV-1486 | REV | 3556197 | 12    | 12    | 12    | RTS_R4_-_1050 |
| TSS-REV-1487 | REV | 3556202 | 14    | 14    | 14    | RTS_R4_-_1050 |
| TSS-REV-1488 | REV | 3558752 | 60    | 62    | 62    | RTS_R4_-_1051 |
| TSS-REV-1489 | REV | 3558903 | 126   | 126   | 126   | RTS_R4_-_1051 |
| TSS-REV-1490 | REV | 3559883 | 127   | 127   | 127   | RTS_R4_-_1052 |
| TSS-REV-1491 | REV | 3566419 | 97    | 97    | 98    | RTS_R4_-_1054 |
| TSS-REV-1492 | REV | 3567411 | 63    | 70    | 71    | RTS_R4_-_1055 |
| TSS-REV-1493 | REV | 3567480 | 150   | 151   | 151   | RTS_R4_-_1055 |
| TSS-REV-1494 | REV | 3567595 | 66    | 66    | 68    | RTS_R4_-_1055 |

|              |     |         |      |      |      |               |
|--------------|-----|---------|------|------|------|---------------|
| TSS-REV-1495 | REV | 3571644 | 35   | 35   | 35   | RTS_R4_-_1056 |
| TSS-REV-1496 | REV | 3571787 | 27   | 27   | 27   | RTS_R4_-_1056 |
| TSS-REV-1497 | REV | 3571792 | 40   | 40   | 40   | RTS_R4_-_1056 |
| TSS-REV-1498 | REV | 3572903 | 10   | 10   | 10   | RTS_R4_-_1057 |
| TSS-REV-1499 | REV | 3574307 |      | 1    | 1    | RTS_R4_-_1058 |
| TSS-REV-1500 | REV | 3576961 | 25   | 25   | 26   | RTS_R4_-_1059 |
| TSS-REV-1501 | REV | 3578831 | 62   | 62   | 63   | RTS_R4_-_1060 |
| TSS-REV-1502 | REV | 3578852 | 502  | 502  | 506  | RTS_R4_-_1060 |
| TSS-REV-1503 | REV | 3579039 | 3    | 4    | 49   | RTS_R4_-_1061 |
| TSS-REV-1504 | REV | 3582323 | 4    | 4    | 4    | RTS_R4_-_1062 |
| TSS-REV-1505 | REV | 3584877 | 1    | 1    | 3    | RTS_R4_-_1063 |
| TSS-REV-1506 | REV | 3585024 |      |      | 2    | RTS_R4_-_1063 |
| TSS-REV-1507 | REV | 3590437 | 2    | 2    | 11   | RTS_R4_-_1064 |
| TSS-REV-1508 | REV | 3590449 | 1    | 1    | 10   | RTS_R4_-_1064 |
| TSS-REV-1509 | REV | 3595627 | 181  | 181  | 181  | RTS_R4_-_1065 |
| TSS-REV-1510 | REV | 3595638 | 1044 | 1051 | 1051 | RTS_R4_-_1065 |
| TSS-REV-1511 | REV | 3595744 | 1230 | 1230 | 1230 | RTS_R4_-_1065 |
| TSS-REV-1512 | REV | 3595769 | 214  | 214  | 214  | RTS_R4_-_1065 |
| TSS-REV-1513 | REV | 3597715 | 103  | 103  | 103  | RTS_R4_-_1066 |
| TSS-REV-1514 | REV | 3597785 | 721  | 723  | 724  | RTS_R4_-_1066 |
| TSS-REV-1515 | REV | 3598820 | 186  | 188  | 191  | RTS_R4_-_1067 |
| TSS-REV-1516 | REV | 3598872 | 48   | 48   | 49   | RTS_R4_-_1067 |
| TSS-REV-1517 | REV | 3598886 | 250  | 278  | 279  | RTS_R4_-_1067 |
| TSS-REV-1518 | REV | 3598893 | 92   | 132  | 135  | RTS_R4_-_1067 |
| TSS-REV-1519 | REV | 3599027 | 2    | 3    | 16   | RTS_R4_-_1067 |
| TSS-REV-1520 | REV | 3599187 | 124  | 124  | 124  | RTS_R4_-_1067 |
| TSS-REV-1521 | REV | 3602333 | 117  | 120  | 121  | RTS_R4_-_1068 |
| TSS-REV-1522 | REV | 3602339 | 172  | 173  | 173  | RTS_R4_-_1068 |
| TSS-REV-1523 | REV | 3607043 | 23   | 23   | 23   | RTS_R4_-_1070 |
| TSS-REV-1524 | REV | 3609782 | 29   | 29   | 29   | RTS_R4_-_1071 |
| TSS-REV-1525 | REV | 3617170 | 8    | 8    | 8    | RTS_R4_-_1072 |
| TSS-REV-1526 | REV | 3617187 | 9    | 11   | 12   | RTS_R4_-_1072 |
| TSS-REV-1527 | REV | 3628862 | 80   | 80   | 80   | RTS_R4_-_1073 |
| TSS-REV-1528 | REV | 3628952 | 45   | 48   | 51   | RTS_R4_-_1073 |
| TSS-REV-1529 | REV | 3635522 | 43   | 43   | 43   | RTS_R4_-_1074 |
| TSS-REV-1530 | REV | 3637869 | 1    | 4    | 55   | RTS_R4_-_1075 |
| TSS-REV-1531 | REV | 3638759 | 2    | 2    | 2    | RTS_R4_-_1076 |
| TSS-REV-1532 | REV | 3643224 | 172  | 277  | 280  | RTS_R4_-_1077 |
| TSS-REV-1533 | REV | 3643261 | 791  | 895  | 896  | RTS_R4_-_1077 |
| TSS-REV-1534 | REV | 3643272 | 126  | 129  | 131  | RTS_R4_-_1077 |
| TSS-REV-1535 | REV | 3646005 | 21   | 22   | 23   | RTS_R4_-_1078 |
| TSS-REV-1536 | REV | 3651291 | 4    | 4    | 4    | RTS_R4_-_1080 |
| TSS-REV-1537 | REV | 3651336 | 4    | 4    | 4    | RTS_R4_-_1080 |
| TSS-REV-1538 | REV | 3654784 | 525  | 525  | 680  | RTS_R4_-_1081 |
| TSS-REV-1539 | REV | 3654793 | 1187 | 1188 | 1526 | RTS_R4_-_1081 |
| TSS-REV-1540 | REV | 3654803 | 100  | 100  | 215  | RTS_R4_-_1081 |
| TSS-REV-1541 | REV | 3654807 | 79   | 79   | 207  | RTS_R4_-_1081 |
| TSS-REV-1542 | REV | 3654814 | 303  | 306  | 542  | RTS_R4_-_1081 |
| TSS-REV-1543 | REV | 3656051 |      |      | 21   | RTS_R4_-_1082 |
| TSS-REV-1544 | REV | 3656077 |      |      | 15   | RTS_R4_-_1082 |
| TSS-REV-1545 | REV | 3662689 | 113  | 114  | 115  | RTS_R4_-_1083 |
| TSS-REV-1546 | REV | 3663855 | 84   | 85   | 88   | RTS_R4_-_1084 |
| TSS-REV-1547 | REV | 3663864 | 61   | 63   | 74   | RTS_R4_-_1084 |
| TSS-REV-1548 | REV | 3665631 |      |      | 34   | RTS_R4_-_1085 |
| TSS-REV-1549 | REV | 3667288 |      | 1    | 1    | RTS_R4_-_1086 |
| TSS-REV-1550 | REV | 3676403 | 18   | 20   | 25   | RTS_R4_-_1087 |
| TSS-REV-1551 | REV | 3677219 | 7    | 7    | 7    | RTS_R4_-_1088 |
| TSS-REV-1552 | REV | 3677250 | 5    | 5    | 5    | RTS_R4_-_1088 |
| TSS-REV-1553 | REV | 3680034 | 5    | 5    | 5    | RTS_R4_-_1089 |
| TSS-REV-1554 | REV | 3681519 | 12   | 12   | 12   | RTS_R4_-_1090 |
| TSS-REV-1555 | REV | 3681683 | 15   | 15   | 15   | RTS_R4_-_1090 |
| TSS-REV-1556 | REV | 3684213 | 3    | 3    | 4    | RTS_R4_-_1091 |
| TSS-REV-1557 | REV | 3684223 | 5    | 5    | 5    | RTS_R4_-_1091 |

|              |     |         |       |       |       |               |
|--------------|-----|---------|-------|-------|-------|---------------|
| TSS-REV-1558 | REV | 3694252 | 102   | 103   | 107   | RTS_R4_-_1092 |
| TSS-REV-1559 | REV | 3694337 | 85    | 85    | 85    | RTS_R4_-_1092 |
| TSS-REV-1560 | REV | 3694346 | 108   | 108   | 108   | RTS_R4_-_1092 |
| TSS-REV-1561 | REV | 3694361 | 140   | 140   | 140   | RTS_R4_-_1092 |
| TSS-REV-1562 | REV | 3694387 | 1040  | 1040  | 1040  | RTS_R4_-_1092 |
| TSS-REV-1563 | REV | 3698295 | 4     | 4     | 4     | RTS_R4_-_1093 |
| TSS-REV-1564 | REV | 3698620 | 7     | 7     | 7     | RTS_R4_-_1094 |
| TSS-REV-1565 | REV | 3705731 | 33    | 33    | 33    | RTS_R4_-_1095 |
| TSS-REV-1566 | REV | 3705750 | 39    | 39    | 39    | RTS_R4_-_1095 |
| TSS-REV-1567 | REV | 3705826 | 55    | 55    | 55    | RTS_R4_-_1095 |
| TSS-REV-1568 | REV | 3705893 | 16    | 16    | 18    | RTS_R4_-_1095 |
| TSS-REV-1569 | REV | 3706715 | 1019  | 1442  | 2195  | RTS_R4_-_1096 |
| TSS-REV-1570 | REV | 3708608 | 3     | 3     | 3     | RTS_R4_-_1097 |
| TSS-REV-1571 | REV | 3711033 | 5     | 5     | 13    | RTS_R4_-_1098 |
| TSS-REV-1572 | REV | 3714451 | 3     | 3     | 3     | RTS_R4_-_1099 |
| TSS-REV-1573 | REV | 3714580 | 5     | 5     | 5     | RTS_R4_-_1099 |
| TSS-REV-1574 | REV | 3723377 | 407   | 407   | 407   | RTS_R4_-_1101 |
| TSS-REV-1575 | REV | 3723815 |       |       | 1     | RTS_R4_-_1102 |
| TSS-REV-1576 | REV | 3728830 | 8     | 8     | 9     | RTS_R4_-_1103 |
| TSS-REV-1577 | REV | 3730755 | 51    | 54    | 54    | RTS_R4_-_1104 |
| TSS-REV-1578 | REV | 3735265 | 260   | 260   | 260   | RTS_R4_-_1105 |
| TSS-REV-1579 | REV | 3740563 | 4     | 4     | 4     | RTS_R4_-_1106 |
| TSS-REV-1580 | REV | 3749066 | 2     | 2     | 2     | RTS_R4_-_1107 |
| TSS-REV-1581 | REV | 3749762 | 12    | 12    | 14    | RTS_R4_-_1108 |
| TSS-REV-1582 | REV | 3754558 | 6     | 7     | 22    | RTS_R4_-_1109 |
| TSS-REV-1583 | REV | 3754659 | 15    | 15    | 15    | RTS_R4_-_1109 |
| TSS-REV-1584 | REV | 3759323 | 147   | 148   | 148   | RTS_R4_-_1110 |
| TSS-REV-1585 | REV | 3760004 | 34    | 34    | 34    | RTS_R4_-_1111 |
| TSS-REV-1586 | REV | 3764114 | 8     | 8     | 15    | RTS_R4_-_1112 |
| TSS-REV-1587 | REV | 3765702 | 7     | 7     | 7     | RTS_R4_-_1113 |
| TSS-REV-1588 | REV | 3774469 | 19    | 52    | 56    | RTS_R4_-_1115 |
| TSS-REV-1589 | REV | 3780704 | 72    | 72    | 122   | RTS_R4_-_1116 |
| TSS-REV-1590 | REV | 3782183 | 413   | 413   | 414   | RTS_R4_-_1117 |
| TSS-REV-1591 | REV | 3782529 | 258   | 259   | 259   | RTS_R4_-_1118 |
| TSS-REV-1592 | REV | 3783077 | 1683  | 1685  | 1685  | RTS_R4_-_1119 |
| TSS-REV-1593 | REV | 3790746 | 12    | 12    | 12    | RTS_R4_-_1120 |
| TSS-REV-1594 | REV | 3791734 | 57    | 57    | 57    | RTS_R4_-_1121 |
| TSS-REV-1595 | REV | 3796838 | 159   | 159   | 159   | RTS_R4_-_1122 |
| TSS-REV-1596 | REV | 3799018 | 11    | 11    | 11    | RTS_R4_-_1123 |
| TSS-REV-1597 | REV | 3799105 | 10    | 10    | 10    | RTS_R4_-_1123 |
| TSS-REV-1598 | REV | 3799236 | 9     | 9     | 9     | RTS_R4_-_1123 |
| TSS-REV-1599 | REV | 3800527 | 71    | 71    | 71    | RTS_R4_-_1124 |
| TSS-REV-1600 | REV | 3800542 | 51    | 51    | 51    | RTS_R4_-_1124 |
| TSS-REV-1601 | REV | 3802583 | 32    | 32    | 32    | RTS_R4_-_1125 |
| TSS-REV-1602 | REV | 3803796 | 93    | 93    | 93    | RTS_R4_-_1126 |
| TSS-REV-1603 | REV | 3804755 | 20    | 20    | 20    | RTS_R4_-_1127 |
| TSS-REV-1604 | REV | 3806260 | 21    | 21    | 21    | RTS_R4_-_1128 |
| TSS-REV-1605 | REV | 3809198 | 19    | 32    | 33    | RTS_R4_-_1129 |
| TSS-REV-1606 | REV | 3809827 | 19386 | 19389 | 19389 | RTS_R4_-_1130 |
| TSS-REV-1607 | REV | 3809987 | 65    | 65    | 65    | RTS_R4_-_1130 |
| TSS-REV-1608 | REV | 3814579 | 16    | 17    | 17    | RTS_R4_-_1131 |
| TSS-REV-1609 | REV | 3826724 | 49    | 57    | 57    | RTS_R4_-_1132 |
| TSS-REV-1610 | REV | 3826788 | 88    | 88    | 89    | RTS_R4_-_1132 |
| TSS-REV-1611 | REV | 3838039 | 1441  | 1441  | 1442  | RTS_R4_-_1133 |
| TSS-REV-1612 | REV | 3839794 | 6     | 6     | 6     |               |
| TSS-REV-1613 | REV | 3850893 | 52    | 52    | 52    | RTS_R4_-_1135 |
| TSS-REV-1614 | REV | 3851039 | 83    | 83    | 87    | RTS_R4_-_1136 |
| TSS-REV-1615 | REV | 3851215 |       |       | 2     |               |
| TSS-REV-1616 | REV | 3851280 |       |       | 1     |               |
| TSS-REV-1617 | REV | 3854408 | 7     | 7     | 8     | RTS_R4_-_1137 |
| TSS-REV-1618 | REV | 3854437 | 6     | 7     | 9     | RTS_R4_-_1137 |
| TSS-REV-1619 | REV | 3865000 |       | 738   | 740   | RTS_R4_-_1139 |
| TSS-REV-1620 | REV | 3865032 | 9     | 3865  | 3868  | RTS_R4_-_1139 |

|              |     |         |      |      |      |               |
|--------------|-----|---------|------|------|------|---------------|
| TSS-REV-1621 | REV | 3865541 | 2    | 241  | 242  | RTS_R4_-_1140 |
| TSS-REV-1622 | REV | 3867318 | 4    | 7    | 7    | RTS_R4_-_1141 |
| TSS-REV-1623 | REV | 3873209 | 73   | 77   | 80   | RTS_R4_-_1142 |
| TSS-REV-1624 | REV | 3875000 | 176  | 177  | 180  | RTS_R4_-_1143 |
| TSS-REV-1625 | REV | 3875526 | 77   | 78   | 78   | RTS_R4_-_1144 |
| TSS-REV-1626 | REV | 3878175 | 179  | 185  | 186  | RTS_R4_-_1145 |
| TSS-REV-1627 | REV | 3879914 | 58   | 59   | 59   | RTS_R4_-_1146 |
| TSS-REV-1628 | REV | 3881901 | 15   | 19   | 19   | RTS_R4_-_1147 |
| TSS-REV-1629 | REV | 3891867 | 11   | 11   | 12   | RTS_R4_-_1148 |
| TSS-REV-1630 | REV | 3894662 | 44   | 44   | 44   | RTS_R4_-_1149 |
| TSS-REV-1631 | REV | 3909724 | 23   | 23   | 23   | RTS_R4_-_1150 |
| TSS-REV-1632 | REV | 3913244 | 2431 | 2432 | 2432 | RTS_R4_-_1151 |
| TSS-REV-1633 | REV | 3913348 | 133  | 133  | 133  | RTS_R4_-_1151 |
| TSS-REV-1634 | REV | 3920513 | 186  | 186  | 186  | RTS_R4_-_1152 |
| TSS-REV-1635 | REV | 3923686 | 20   | 22   | 22   | RTS_R4_-_1153 |
| TSS-REV-1636 | REV | 3923702 | 20   | 24   | 24   | RTS_R4_-_1153 |
| TSS-REV-1637 | REV | 3924499 | 50   | 50   | 50   | RTS_R4_-_1154 |
| TSS-REV-1638 | REV | 3925053 | 7    | 8    | 8    | RTS_R4_-_1155 |
| TSS-REV-1639 | REV | 3927702 | 5    | 5    | 5    | RTS_R4_-_1156 |
| TSS-REV-1640 | REV | 3927781 | 6    | 6    | 6    | RTS_R4_-_1156 |
| TSS-REV-1641 | REV | 3929153 | 43   | 44   | 45   | RTS_R4_-_1157 |
| TSS-REV-1642 | REV | 3939377 | 122  | 122  | 122  | RTS_R4_-_1158 |
| TSS-REV-1643 | REV | 3946015 | 10   | 11   | 11   | RTS_R4_-_1159 |
| TSS-REV-1644 | REV | 3955895 | 11   | 11   | 11   | RTS_R4_-_1160 |
| TSS-REV-1645 | REV | 3957862 | 20   | 21   | 21   | RTS_R4_-_1161 |
| TSS-REV-1646 | REV | 3958493 | 21   | 21   | 21   | RTS_R4_-_1162 |
| TSS-REV-1647 | REV | 3963691 | 79   | 82   | 84   | RTS_R4_-_1163 |
| TSS-REV-1648 | REV | 3984114 | 16   | 16   | 16   | RTS_R4_-_1164 |
| TSS-REV-1649 | REV | 3987236 | 68   | 74   | 75   | RTS_R4_-_1165 |
| TSS-REV-1650 | REV | 3987493 | 43   | 45   | 49   | RTS_R4_-_1165 |
| TSS-REV-1651 | REV | 3988812 | 24   | 26   | 26   | RTS_R4_-_1166 |
| TSS-REV-1652 | REV | 3992106 | 157  | 158  | 159  | RTS_R4_-_1167 |
| TSS-REV-1653 | REV | 4002748 | 29   | 30   | 32   | RTS_R4_-_1168 |
| TSS-REV-1654 | REV | 4007109 | 9    | 9    | 9    | RTS_R4_-_1169 |
| TSS-REV-1655 | REV | 4010878 | 37   | 56   | 58   | RTS_R4_-_1170 |
| TSS-REV-1656 | REV | 4014216 | 44   | 44   | 45   | RTS_R4_-_1171 |
| TSS-REV-1657 | REV | 4022866 | 23   | 23   | 23   | RTS_R4_-_1172 |
| TSS-REV-1658 | REV | 4029036 | 2    | 2    | 4    | RTS_R4_-_1173 |
| TSS-REV-1659 | REV | 4040165 | 49   | 50   | 50   | RTS_R4_-_1174 |
| TSS-REV-1660 | REV | 4044649 | 49   | 49   | 49   | RTS_R4_-_1175 |
| TSS-REV-1661 | REV | 4048811 | 49   | 51   | 51   | RTS_R4_-_1176 |
| TSS-REV-1662 | REV | 4048817 | 84   | 84   | 84   | RTS_R4_-_1176 |
| TSS-REV-1663 | REV | 4051800 | 517  | 522  | 529  | RTS_R4_-_1177 |
| TSS-REV-1664 | REV | 4056075 | 79   | 79   | 79   | RTS_R4_-_1179 |
| TSS-REV-1665 | REV | 4056101 | 390  | 394  | 395  | RTS_R4_-_1179 |
| TSS-REV-1666 | REV | 4056109 | 62   | 63   | 63   | RTS_R4_-_1179 |
| TSS-REV-1667 | REV | 4056129 | 54   | 59   | 59   | RTS_R4_-_1179 |
| TSS-REV-1668 | REV | 4079332 | 90   | 91   | 91   | RTS_R4_-_1180 |
| TSS-REV-1669 | REV | 4079351 | 183  | 183  | 183  | RTS_R4_-_1180 |
| TSS-REV-1670 | REV | 4079384 | 177  | 178  | 178  | RTS_R4_-_1180 |
| TSS-REV-1671 | REV | 4083953 | 43   | 51   | 77   | RTS_R4_-_1181 |
| TSS-REV-1672 | REV | 4083987 | 93   | 93   | 93   | RTS_R4_-_1181 |
| TSS-REV-1673 | REV | 4098605 | 3    | 3    | 3    | RTS_R4_-_1182 |
| TSS-REV-1674 | REV | 4098760 | 3    | 3    | 3    | RTS_R4_-_1182 |
| TSS-REV-1675 | REV | 4100760 | 2    | 2    | 2    | RTS_R4_-_1183 |
| TSS-REV-1676 | REV | 4103708 | 135  | 146  | 146  | RTS_R4_-_1184 |
| TSS-REV-1677 | REV | 4103751 | 47   | 48   | 49   | RTS_R4_-_1184 |
| TSS-REV-1678 | REV | 4109564 | 1765 | 1765 | 1767 | RTS_R4_-_1185 |
| TSS-REV-1679 | REV | 4109592 | 2258 | 2262 | 2263 | RTS_R4_-_1185 |
| TSS-REV-1680 | REV | 4109598 | 1950 | 1951 | 1951 | RTS_R4_-_1185 |
| TSS-REV-1681 | REV | 4110260 | 93   | 93   | 93   | RTS_R4_-_1186 |
| TSS-REV-1682 | REV | 4112520 | 32   | 32   | 32   | RTS_R4_-_1187 |
| TSS-REV-1683 | REV | 4113626 | 29   | 30   | 30   | RTS_R4_-_1188 |

|              |     |         |      |      |      |               |
|--------------|-----|---------|------|------|------|---------------|
| TSS-REV-1684 | REV | 4117379 | 358  | 364  | 367  | RTS_R4_-_1190 |
| TSS-REV-1685 | REV | 4118424 | 158  | 159  | 159  | RTS_R4_-_1191 |
| TSS-REV-1686 | REV | 4118430 | 187  | 187  | 187  | RTS_R4_-_1191 |
| TSS-REV-1687 | REV | 4120333 | 76   | 115  | 117  | RTS_R4_-_1192 |
| TSS-REV-1688 | REV | 4120371 | 713  | 822  | 825  | RTS_R4_-_1192 |
| TSS-REV-1689 | REV | 4122533 | 195  | 203  | 204  | RTS_R4_-_1194 |
| TSS-REV-1690 | REV | 4124857 | 24   | 28   | 28   | RTS_R4_-_1195 |
| TSS-REV-1691 | REV | 4126446 | 99   | 116  | 122  | RTS_R4_-_1196 |
| TSS-REV-1692 | REV | 4126488 | 124  | 127  | 129  | RTS_R4_-_1196 |
| TSS-REV-1693 | REV | 4126552 | 382  | 389  | 407  | RTS_R4_-_1196 |
| TSS-REV-1694 | REV | 4131790 | 8    | 8    | 9    | RTS_R4_-_1197 |
| TSS-REV-1695 | REV | 4146619 | 215  | 215  | 217  | RTS_R4_-_1199 |
| TSS-REV-1696 | REV | 4148374 | 16   | 16   | 16   | RTS_R4_-_1200 |
| TSS-REV-1697 | REV | 4151210 | 1144 | 1146 | 1147 | RTS_R4_-_1201 |
| TSS-REV-1698 | REV | 4152919 | 1000 | 1004 | 1004 | RTS_R4_-_1202 |
| TSS-REV-1699 | REV | 4153098 | 13   | 13   | 13   | RTS_R4_-_1202 |
| TSS-REV-1700 | REV | 4156365 | 3    | 6    | 14   | RTS_R4_-_1203 |
| TSS-REV-1701 | REV | 4158845 | 34   | 34   | 35   | RTS_R4_-_1204 |
| TSS-REV-1702 | REV | 4161318 | 6    | 7    | 7    | RTS_R4_-_1205 |
| TSS-REV-1703 | REV | 4173130 | 54   | 54   | 54   | RTS_R4_-_1207 |
| TSS-REV-1704 | REV | 4188551 | 251  | 251  | 251  | RTS_R4_-_1208 |
| TSS-REV-1705 | REV | 4194323 | 153  | 155  | 155  | RTS_R4_-_1209 |
| TSS-REV-1706 | REV | 4194398 | 148  | 148  | 148  | RTS_R4_-_1209 |
| TSS-REV-1707 | REV | 4194882 | 4    | 4    | 4    | RTS_R4_-_1210 |
| TSS-REV-1708 | REV | 4194977 | 1    | 1    | 1    | RTS_R4_-_1210 |
| TSS-REV-1709 | REV | 4199735 | 10   | 10   | 10   | RTS_R4_-_1211 |
| TSS-REV-1710 | REV | 4205593 | 793  | 794  | 794  | RTS_R4_-_1212 |
| TSS-REV-1711 | REV | 4212165 | 5    | 6    | 8    | RTS_R4_-_1213 |
| TSS-REV-1712 | REV | 4221675 | 22   | 23   | 23   | RTS_R4_-_1214 |
| TSS-REV-1713 | REV | 4228191 | 7    | 7    | 7    | RTS_R4_-_1215 |
| TSS-REV-1714 | REV | 4229722 | 17   | 17   | 17   | RTS_R4_-_1216 |
| TSS-REV-1715 | REV | 4231560 | 126  | 126  | 126  | RTS_R4_-_1217 |
| TSS-REV-1716 | REV | 4238277 |      |      | 1    | RTS_R4_-_1218 |
| TSS-REV-1717 | REV | 4244488 | 29   | 29   | 29   | RTS_R4_-_1219 |
| TSS-REV-1718 | REV | 4254658 | 36   | 36   | 37   | RTS_R4_-_1220 |
| TSS-REV-1719 | REV | 4258054 | 17   | 17   | 17   | RTS_R4_-_1221 |
| TSS-REV-1720 | REV | 4262317 | 54   | 55   | 60   | RTS_R4_-_1222 |
| TSS-REV-1721 | REV | 4262327 | 162  | 163  | 174  | RTS_R4_-_1222 |
| TSS-REV-1722 | REV | 4271914 | 6    | 6    | 6    | RTS_R4_-_1223 |
| TSS-REV-1723 | REV | 4273158 | 30   | 30   | 30   | RTS_R4_-_1224 |
| TSS-REV-1724 | REV | 4275432 | 55   | 60   | 66   | RTS_R4_-_1225 |
| TSS-REV-1725 | REV | 4275446 | 37   | 40   | 49   | RTS_R4_-_1225 |
| TSS-REV-1726 | REV | 4276089 | 7    | 15   | 348  | RTS_R4_-_1226 |
| TSS-REV-1727 | REV | 4285413 | 366  | 366  | 677  | RTS_R4_-_1227 |
| TSS-REV-1728 | REV | 4295172 | 6    | 6    | 6    | RTS_R4_-_1228 |
| TSS-REV-1729 | REV | 4297441 | 6    | 6    | 6    | RTS_R4_-_1229 |
| TSS-REV-1730 | REV | 4311039 | 60   | 60   | 60   | RTS_R4_-_1230 |
| TSS-REV-1731 | REV | 4313646 | 8    | 8    | 8    | RTS_R4_-_1231 |
| TSS-REV-1732 | REV | 4323744 | 6    | 6    | 6    | RTS_R4_-_1232 |
| TSS-REV-1733 | REV | 4323789 |      |      | 8    | RTS_R4_-_1232 |
| TSS-REV-1734 | REV | 4324818 | 70   | 72   | 72   | RTS_R4_-_1233 |
| TSS-REV-1735 | REV | 4332070 | 5    | 5    | 5    | RTS_R4_-_1234 |
| TSS-REV-1736 | REV | 4339673 | 4    | 4    | 9    | RTS_R4_-_1235 |
| TSS-REV-1737 | REV | 4347112 | 12   | 12   | 12   | RTS_R4_-_1236 |
| TSS-REV-1738 | REV | 4348570 | 37   | 37   | 37   | RTS_R4_-_1237 |
| TSS-REV-1739 | REV | 4349711 | 17   | 17   | 17   | RTS_R4_-_1238 |
| TSS-REV-1740 | REV | 4352820 | 159  | 160  | 160  | RTS_R4_-_1239 |
| TSS-REV-1741 | REV | 4353810 | 4    | 4    | 4    | RTS_R4_-_1240 |
| TSS-REV-1742 | REV | 4359983 | 15   | 15   | 15   |               |
| TSS-REV-1743 | REV | 4361353 | 20   | 22   | 44   | RTS_R4_-_1242 |
| TSS-REV-1744 | REV | 4363567 | 62   | 67   | 82   | RTS_R4_-_1243 |
| TSS-REV-1745 | REV | 4364954 | 54   | 88   | 141  | RTS_R4_-_1244 |
| TSS-REV-1746 | REV | 4366481 | 10   | 10   | 10   | RTS_R4_-_1245 |



|              |     |         |      |      |      |               |
|--------------|-----|---------|------|------|------|---------------|
| TSS-REV-1747 | REV | 4366576 | 9    | 9    | 9    | RTS_R4_-_1245 |
| TSS-REV-1748 | REV | 4368478 | 35   | 36   | 41   | RTS_R4_-_1246 |
| TSS-REV-1749 | REV | 4372334 | 14   | 14   | 14   |               |
| TSS-REV-1750 | REV | 4373707 | 51   | 51   | 51   | RTS_R4_-_1247 |
| TSS-REV-1751 | REV | 4373723 | 875  | 883  | 884  | RTS_R4_-_1247 |
| TSS-REV-1752 | REV | 4375769 | 20   | 20   | 28   | RTS_R4_-_1248 |
| TSS-REV-1753 | REV | 4377026 | 79   | 79   | 79   | RTS_R4_-_1249 |
| TSS-REV-1754 | REV | 4380421 | 50   | 55   | 59   | RTS_R4_-_1250 |
| TSS-REV-1755 | REV | 4380437 | 402  | 434  | 460  | RTS_R4_-_1250 |
| TSS-REV-1756 | REV | 4388446 | 210  | 210  | 210  | RTS_R4_-_1251 |
| TSS-REV-1757 | REV | 4389612 | 140  | 146  | 146  | RTS_R4_-_1252 |
| TSS-REV-1758 | REV | 4392071 | 22   | 23   | 24   | RTS_R4_-_1253 |
| TSS-REV-1759 | REV | 4414787 | 1    | 1    | 35   | RTS_R4_-_1254 |
| TSS-REV-1760 | REV | 4416493 | 23   | 27   | 27   | RTS_R4_-_1255 |
| TSS-REV-1761 | REV | 4416505 | 31   | 34   | 34   | RTS_R4_-_1255 |
| TSS-REV-1762 | REV | 4417675 | 14   | 15   | 15   | RTS_R4_-_1256 |
| TSS-REV-1763 | REV | 4417700 | 21   | 21   | 21   | RTS_R4_-_1256 |
| TSS-REV-1764 | REV | 4422866 | 38   | 39   | 74   | RTS_R4_-_1257 |
| TSS-REV-1765 | REV | 4425738 | 8    | 8    | 8    |               |
| TSS-REV-1766 | REV | 4426842 | 36   | 40   | 40   | RTS_R4_-_1258 |
| TSS-REV-1767 | REV | 4427737 |      |      | 7    | RTS_R4_-_1259 |
| TSS-REV-1768 | REV | 4427775 | 9    | 9    | 9    | RTS_R4_-_1259 |
| TSS-REV-1769 | REV | 4430032 | 2    | 2    | 2    | RTS_R4_-_1260 |
| TSS-REV-1770 | REV | 4431075 | 12   | 12   | 12   |               |
| TSS-REV-1771 | REV | 4431141 | 10   | 10   | 12   |               |
| TSS-REV-1772 | REV | 4431182 | 20   | 20   | 20   |               |
| TSS-REV-1773 | REV | 4432075 | 35   | 36   | 36   | RTS_R4_-_1261 |
| TSS-REV-1774 | REV | 4434652 | 30   | 31   | 31   | RTS_R4_-_1262 |
| TSS-REV-1775 | REV | 4437333 |      |      | 8    | RTS_R4_-_1263 |
| TSS-REV-1776 | REV | 4439273 | 5    | 5    | 5    | RTS_R4_-_1264 |
| TSS-REV-1777 | REV | 4439407 | 4    | 4    | 5    | RTS_R4_-_1264 |
| TSS-REV-1778 | REV | 4440285 | 141  | 143  | 146  | RTS_R4_-_1265 |
| TSS-REV-1779 | REV | 4447709 | 7865 | 7878 | 7880 | RTS_R4_-_1266 |
| TSS-REV-1780 | REV | 4453663 | 76   | 77   | 77   | RTS_R4_-_1267 |
| TSS-REV-1781 | REV | 4453669 | 68   | 68   | 70   | RTS_R4_-_1267 |
| TSS-REV-1782 | REV | 4455910 | 68   | 68   | 68   | RTS_R4_-_1268 |
| TSS-REV-1783 | REV | 4460853 | 10   | 10   | 10   | RTS_R4_-_1269 |
| TSS-REV-1784 | REV | 4465297 | 8    | 8    | 8    | RTS_R4_-_1270 |
| TSS-REV-1785 | REV | 4465303 | 6    | 6    | 6    | RTS_R4_-_1270 |
| TSS-REV-1786 | REV | 4468967 | 265  | 272  | 273  | RTS_R4_-_1271 |
| TSS-REV-1787 | REV | 4470574 | 139  | 140  | 140  | RTS_R4_-_1272 |
| TSS-REV-1788 | REV | 4471189 | 13   | 13   | 13   | RTS_R4_-_1273 |
| TSS-REV-1789 | REV | 4472082 | 3    | 3    | 3    | RTS_R4_-_1274 |
| TSS-REV-1790 | REV | 4476367 | 737  | 985  | 985  | RTS_R4_-_1275 |
| TSS-REV-1791 | REV | 4477592 | 91   | 91   | 91   | RTS_R4_-_1276 |
| TSS-REV-1792 | REV | 4481941 | 856  | 871  | 871  | RTS_R4_-_1277 |
| TSS-REV-1793 | REV | 4481950 | 106  | 106  | 106  | RTS_R4_-_1277 |
| TSS-REV-1794 | REV | 4482296 | 1    | 3    | 4    | RTS_R4_-_1278 |
| TSS-REV-1795 | REV | 4484124 | 124  | 125  | 126  | RTS_R4_-_1279 |
| TSS-REV-1796 | REV | 4484133 | 99   | 101  | 105  | RTS_R4_-_1279 |
| TSS-REV-1797 | REV | 4484159 | 171  | 171  | 171  | RTS_R4_-_1279 |
| TSS-REV-1798 | REV | 4488106 | 207  | 213  | 245  | RTS_R4_-_1280 |
| TSS-REV-1799 | REV | 4489571 | 3    | 3    | 3    | RTS_R4_-_1281 |
| TSS-REV-1800 | REV | 4489668 | 4    | 4    | 4    | RTS_R4_-_1281 |
| TSS-REV-1801 | REV | 4494256 | 50   | 52   | 66   | RTS_R4_-_1282 |
| TSS-REV-1802 | REV | 4497552 | 26   | 27   | 28   | RTS_R4_-_1283 |
| TSS-REV-1803 | REV | 4498527 |      | 1    | 1    | RTS_R4_-_1284 |
| TSS-REV-1804 | REV | 4501480 | 108  | 108  | 108  | RTS_R4_-_1285 |
| TSS-REV-1805 | REV | 4504927 |      | 1    | 1    | RTS_R4_-_1286 |
| TSS-REV-1806 | REV | 4506740 |      | 1    | 1    | RTS_R4_-_1287 |
| TSS-REV-1807 | REV | 4512624 | 22   | 22   | 22   | RTS_R4_-_1288 |
| TSS-REV-1808 | REV | 4516274 | 15   | 15   | 16   | RTS_R4_-_1289 |
| TSS-REV-1809 | REV | 4516286 | 21   | 21   | 21   | RTS_R4_-_1289 |

|              |     |         |      |      |      |               |
|--------------|-----|---------|------|------|------|---------------|
| TSS-REV-1810 | REV | 4518437 | 152  | 153  | 154  | RTS_R4_-_1290 |
| TSS-REV-1811 | REV | 4526043 | 1    | 1    | 2    | RTS_R4_-_1291 |
| TSS-REV-1812 | REV | 4529709 |      |      | 16   | RTS_R4_-_1292 |
| TSS-REV-1813 | REV | 4530385 | 33   | 35   | 35   | RTS_R4_-_1293 |
| TSS-REV-1814 | REV | 4531869 | 8    | 9    | 9    | RTS_R4_-_1294 |
| TSS-REV-1815 | REV | 4536784 | 25   | 25   | 25   | RTS_R4_-_1295 |
| TSS-REV-1816 | REV | 4549357 | 1    | 1    | 1    | RTS_R4_-_1296 |
| TSS-REV-1817 | REV | 4556259 | 5    | 5    | 5    | RTS_R4_-_1297 |
| TSS-REV-1818 | REV | 4556338 | 8    | 8    | 8    | RTS_R4_-_1297 |
| TSS-REV-1819 | REV | 4557566 | 10   | 10   | 10   | RTS_R4_-_1298 |
| TSS-REV-1820 | REV | 4557613 | 7    | 7    | 7    | RTS_R4_-_1298 |
| TSS-REV-1821 | REV | 4558769 | 5    | 5    | 5    | RTS_R4_-_1299 |
| TSS-REV-1822 | REV | 4565269 | 31   | 31   | 58   | RTS_R4_-_1300 |
| TSS-REV-1823 | REV | 4566662 | 20   | 20   | 20   | RTS_R4_-_1301 |
| TSS-REV-1824 | REV | 4566790 | 6    | 6    | 15   | RTS_R4_-_1301 |
| TSS-REV-1825 | REV | 4569656 | 2    | 2    | 2    | RTS_R4_-_1302 |
| TSS-REV-1826 | REV | 4577384 | 52   | 52   | 52   | RTS_R4_-_1303 |
| TSS-REV-1827 | REV | 4577938 | 5    | 5    | 5    | RTS_R4_-_1304 |
| TSS-REV-1828 | REV | 4581252 | 14   | 14   | 14   | RTS_R4_-_1305 |
| TSS-REV-1829 | REV | 4581296 | 21   | 21   | 21   | RTS_R4_-_1305 |
| TSS-REV-1830 | REV | 4581329 | 19   | 19   | 19   | RTS_R4_-_1305 |
| TSS-REV-1831 | REV | 4584833 | 116  | 116  | 116  | RTS_R4_-_1306 |
| TSS-REV-1832 | REV | 4587083 | 7    | 7    | 7    | RTS_R4_-_1307 |
| TSS-REV-1833 | REV | 4589376 | 3    | 3    | 3    | RTS_R4_-_1308 |
| TSS-REV-1834 | REV | 4593888 | 5    | 5    | 5    | RTS_R4_-_1309 |
| TSS-REV-1835 | REV | 4597516 | 70   | 72   | 72   | RTS_R4_-_1310 |
| TSS-REV-1836 | REV | 4599580 | 24   | 24   | 25   | RTS_R4_-_1311 |
| TSS-REV-1837 | REV | 4599620 | 35   | 35   | 35   | RTS_R4_-_1311 |
| TSS-REV-1838 | REV | 4600916 | 2    | 2    | 2    | RTS_R4_-_1312 |
| TSS-REV-1839 | REV | 4603716 | 384  | 384  | 392  | RTS_R4_-_1313 |
| TSS-REV-1840 | REV | 4604459 | 13   | 13   | 13   | RTS_R4_-_1314 |
| TSS-REV-1841 | REV | 4605745 | 137  | 138  | 138  | RTS_R4_-_1315 |
| TSS-REV-1842 | REV | 4615116 | 11   | 11   | 11   | RTS_R4_-_1316 |
| TSS-REV-1843 | REV | 4622833 | 2    | 2    | 2    | RTS_R4_-_1317 |
| TSS-REV-1844 | REV | 4628586 | 556  | 558  | 559  | RTS_R4_-_1318 |
| TSS-REV-1845 | REV | 4631787 | 59   | 61   | 61   | RTS_R4_-_1319 |
| TSS-REV-1846 | REV | 4631795 | 41   | 42   | 43   | RTS_R4_-_1319 |
| TSS-REV-1847 | REV | 4633376 | 130  | 135  | 157  | RTS_R4_-_1320 |
| TSS-REV-1848 | REV | 4638355 | 2556 | 2695 | 2886 | RTS_R4_-_1321 |
| TSS-REV-1849 | REV | 4638361 | 568  | 587  | 625  | RTS_R4_-_1321 |
| TSS-REV-1850 | REV | 4638442 | 602  | 602  | 604  | RTS_R4_-_1321 |
| TSS-REV-1851 | REV | 4638618 | 115  | 115  | 128  | RTS_R4_-_1321 |
| TSS-REV-1852 | REV | 4638703 | 68   | 71   | 75   | RTS_R4_-_1321 |
