# Supplementary material
Source: PubMed Central journal article supplement (PMC3832199)
Supplement: NIHMS251755-supplement-Supplement_Table9.pdf [file NIHMS251755-supplement-Supplement_Table9.pdf]

**Supplementary Table 9. Boundary accuracy of pORFs.** To examine boundary accuracy, pORFs were compared with ORFs whose translational boundaries have been validated by their N-termini sequences (from EcoGene). We identified 803 pORFs mapped to the validated ORFs (~89%), of which 499 pORFs represent the identical 5' and 3' boundaries (accuracy = ~62%). When we considered the translation start codon selected from the nearest peptide(s) found (npORF), 507 pORFs (accuracy = ~63%) were matched with the validated ORFs.

| EG Number | Gene | Len  | bnum  | Strand | Left   | Right  | pORF         | Decision | npORF         | Left   | Right  | Decision |
|-----------|------|------|-------|--------|--------|--------|--------------|----------|---------------|--------|--------|----------|
| EG10998   | thrA | 820  | b0002 | FWD    | 337    | 2799   | pORF+_337    | equal    | npORF+_337    | 337    | 2799   | equal    |
| EG11000   | thrC | 428  | b0004 | FWD    | 3734   | 5020   | pORF+_3734   | equal    | npORF+_3734   | 3734   | 5020   | equal    |
| EG11556   | talB | 317  | b0008 | FWD    | 8238   | 9191   | pORF+_8175   | inside   | npORF+_8175   | 8238   | 9191   | equal    |
| EG10241   | dnaK | 638  | b0014 | FWD    | 12163  | 14079  | pORF+_12163  | equal    | npORF+_12163  | 12163  | 14079  | equal    |
| EG10240   | dnaJ | 376  | b0015 | FWD    | 14168  | 15298  | pORF+_14138  | inside   | npORF+_14138  | 14168  | 15298  | equal    |
| EG10652   | nhaA | 388  | b0019 | FWD    | 17489  | 18655  |              |          |               |        |        |          |
| EG10492   | ileS | 938  | b0026 | FWD    | 22391  | 25207  | pORF+_22391  | equal    | npORF+_22391  | 22391  | 25207  | equal    |
| EG10134   | carA | 382  | b0032 | FWD    | 29651  | 30799  | pORF+_29624  | inside   | npORF+_29624  | 29651  | 30799  | equal    |
| EG10135   | carB | 1073 | b0033 | FWD    | 30817  | 34038  | pORF+_30817  | equal    | npORF+_30817  | 30817  | 34038  | equal    |
| EG10326   | folA | 159  | b0048 | FWD    | 49823  | 50302  | pORF+_49688  | inside   | npORF+_49688  | 49823  | 50302  | equal    |
| EG10054   | araC | 292  | b0064 | FWD    | 70387  | 71265  | pORF+_70336  | inside   | npORF+_70336  | 70555  | 71265  | inside   |
| EG10500   | ilvI | 574  | b0077 | FWD    | 85630  | 87354  | pORF+_85540  | inside   | npORF+_85540  | 85630  | 87354  | equal    |
| EG11085   | mrwW | 313  | b0082 | FWD    | 90094  | 91035  | pORF+_89965  | inside   | npORF+_89965  | 90097  | 91035  | inside   |
| EG10621   | murE | 495  | b0085 | FWD    | 93166  | 94653  | pORF+_93166  | equal    | npORF+_93166  | 93181  | 94653  | inside   |
| EG10622   | murF | 452  | b0086 | FWD    | 94650  | 96008  | pORF+_94650  | equal    | npORF+_94650  | 94650  | 96008  | equal    |
| EG10620   | murD | 438  | b0088 | FWD    | 97087  | 98403  | pORF+_97087  | equal    | npORF+_97087  | 97201  | 98403  | inside   |
| EG10623   | murG | 355  | b0090 | FWD    | 99644  | 100711 | pORF+_99644  | equal    | npORF+_99644  | 99644  | 100711 | equal    |
| EG10619   | murC | 491  | b0091 | FWD    | 100765 | 102240 | pORF+_100765 | equal    | npORF+_100765 | 100765 | 102240 | equal    |
| EG10214   | ddlB | 306  | b0092 | FWD    | 102233 | 103153 | pORF+_102233 | equal    | npORF+_102233 | 102233 | 103153 | equal    |
| EG10347   | ftsZ | 383  | b0095 | FWD    | 105305 | 106456 | pORF+_105305 | equal    | npORF+_105305 | 105305 | 106456 | equal    |
| EG10265   | lpxC | 305  | b0096 | FWD    | 106557 | 107474 | pORF+_106557 | equal    | npORF+_106557 | 106557 | 107474 | equal    |
| EG10936   | secA | 901  | b0098 | FWD    | 108279 | 110984 | pORF+_108279 | equal    | npORF+_108279 | 108339 | 110984 | inside   |
| EG10626   | mutT | 129  | b0099 | FWD    | 111044 | 111433 |              |          |               |        |        |          |
| EG10422   | guaC | 347  | b0104 | FWD    | 113444 | 114487 | pORF+_113444 | equal    | npORF+_113444 | 113444 | 114487 | equal    |
| EG10024   | aceE | 887  | b0114 | FWD    | 123017 | 125680 | pORF+_123017 | equal    | npORF+_123017 | 123017 | 125680 | equal    |
| EG10025   | aceF | 630  | b0115 | FWD    | 125695 | 127587 | pORF+_125695 | equal    | npORF+_125695 | 125695 | 127587 | equal    |
| EG10543   | lpd  | 474  | b0116 | FWD    | 127912 | 129336 | pORF+_127879 | inside   | npORF+_127879 | 127912 | 129336 | equal    |
| EG12316   | acnB | 865  | b0118 | FWD    | 131615 | 134212 | pORF+_131462 | inside   | npORF+_131462 | 131615 | 134212 | equal    |
| EG12318   | cueO | 516  | b0123 | FWD    | 137083 | 138633 | pORF+_137044 | inside   | npORF+_137044 | 137137 | 138633 | inside   |
| EG10302   | fhuA | 747  | b0150 | FWD    | 167484 | 169727 | pORF+_167484 | equal    | npORF+_167484 | 167562 | 169727 | inside   |
| EG10225   | dgt  | 505  | b0160 | FWD    | 179237 | 180754 | pORF+_179237 | equal    | npORF+_179237 | 180437 | 180754 | inside   |
| EG10463   | degP | 474  | b0161 | FWD    | 180884 | 182308 | pORF+_180884 | equal    | npORF+_180884 | 180884 | 182308 | equal    |
| EG10901   | rpsB | 241  | b0169 | FWD    | 189874 | 190599 | pORF+_189676 | inside   | npORF+_189676 | 189874 | 190599 | equal    |
| EG11033   | tsf  | 283  | b0170 | FWD    | 190857 | 191708 | pORF+_190857 | equal    | npORF+_190857 | 190857 | 191708 | equal    |
| EG11539   | pyrH | 241  | b0171 | FWD    | 191855 | 192580 | pORF+_191855 | equal    | npORF+_191855 | 191855 | 192580 | equal    |
| EG10335   | frr  | 185  | b0172 | FWD    | 192872 | 193429 | pORF+_192872 | equal    | npORF+_192872 | 192827 | 193429 | inside   |
| EG13329   | ispU | 253  | b0174 | FWD    | 194903 | 195664 | pORF+_194903 | equal    | npORF+_194903 | 194939 | 195664 | inside   |
| EG12676   | bamA | 810  | b0177 | FWD    | 197928 | 200360 | pORF+_197928 | equal    | npORF+_197928 | 197943 | 200360 | inside   |
| EG10455   | skp  | 161  | b0178 | FWD    | 200482 | 200967 | pORF+_200482 | equal    | npORF+_200482 | 200482 | 200967 | equal    |
| EG10316   | lpxD | 341  | b0179 | FWD    | 200971 | 201996 | pORF+_200971 | equal    | npORF+_200971 | 201094 | 201996 | inside   |
| EG11284   | fabZ | 151  | b0180 | FWD    | 202101 | 202556 | pORF+_202008 | inside   | npORF+_202008 | 202101 | 202556 | equal    |

|         |      |      |       |     |        |        |              |        |               |        |        |        |
|---------|------|------|-------|-----|--------|--------|--------------|--------|---------------|--------|--------|--------|
| EG10545 | lpxA | 262  | b0181 | FWD | 202560 | 203348 | pORF+_202560 | equal  | npORF+_202560 | 202599 | 203348 | inside |
| EG10546 | lpxB | 382  | b0182 | FWD | 203348 | 204496 | pORF+_203348 | equal  | npORF+_203348 | 203861 | 204496 | inside |
| EG10861 | rnhB | 198  | b0183 | FWD | 204493 | 205089 |              |        |               |        |        |        |
| EG11647 | accA | 319  | b0185 | FWD | 208621 | 209580 | pORF+_208621 | equal  | npORF+_208621 | 208621 | 209580 | equal  |
| EG13219 | ldcC | 713  | b0186 | FWD | 209679 | 211820 | pORF+_209679 | equal  | npORF+_209679 | 210135 | 211820 | inside |
| EG13547 | ivy  | 157  | b0220 | FWD | 240343 | 240816 | pORF+_240343 | equal  | npORF+_240343 | 240421 | 240816 | inside |
| EG11092 | crl  | 133  | b0240 | FWD | 257829 | 258230 | pORF+_257829 | equal  | npORF+_257829 | 257862 | 258230 | inside |
| EG10768 | proB | 367  | b0242 | FWD | 259612 | 260715 | pORF+_259525 | inside | npORF+_259525 | 259612 | 260715 | equal  |
| EG10767 | proA | 417  | b0243 | FWD | 260727 | 261980 | pORF+_260727 | equal  | npORF+_260727 | 260727 | 261980 | equal  |
| EG11326 | codA | 427  | b0337 | FWD | 355395 | 356678 | pORF+_355380 | inside | npORF+_355380 | 355395 | 356678 | equal  |
| EG10176 | cynT | 219  | b0339 | FWD | 358023 | 358682 |              |        |               |        |        |        |
| EG10175 | cynS | 156  | b0340 | FWD | 358713 | 359183 |              |        |               |        |        |        |
| EG20274 | mhpB | 314  | b0348 | FWD | 369501 | 370445 |              |        |               |        |        |        |
| EG14274 | mhpD | 269  | b0350 | FWD | 371339 | 372148 |              |        |               |        |        |        |
| EG13300 | tauA | 320  | b0365 | FWD | 384456 | 385418 | pORF+_384399 | inside | npORF+_384399 | 384612 | 385418 | inside |
| EG12423 | tauD | 283  | b0368 | FWD | 387019 | 387870 | pORF+_387019 | equal  | npORF+_387019 | 387151 | 387870 | inside |
| EG10727 | phoA | 471  | b0383 | FWD | 400971 | 402386 | pORF+_400902 | inside | npORF+_400902 | 401046 | 402386 | inside |
| EG10082 | aroL | 174  | b0388 | FWD | 405629 | 406153 | pORF+_405629 | equal  | npORF+_405629 | 405629 | 406153 | equal  |
| EG10996 | tgt  | 375  | b0406 | FWD | 425361 | 426488 | pORF+_425361 | equal  | npORF+_425361 | 425361 | 426488 | equal  |
| EG13613 | yajQ | 163  | b0426 | FWD | 443907 | 444398 | pORF+_443739 | inside | npORF+_443739 | 443907 | 444398 | equal  |
| EG11003 | tig  | 432  | b0436 | FWD | 454357 | 455655 | pORF+_454357 | equal  | npORF+_454357 | 454357 | 455655 | equal  |
| EG10158 | clpP | 207  | b0437 | FWD | 455901 | 456524 | pORF+_455901 | equal  | npORF+_455901 | 455940 | 456524 | inside |
| EG10159 | clpX | 424  | b0438 | FWD | 456650 | 457924 | pORF+_456650 | equal  | npORF+_456650 | 456683 | 457924 | inside |
| EG10542 | lon  | 784  | b0439 | FWD | 458112 | 460466 | pORF+_458067 | inside | npORF+_458067 | 458112 | 460466 | equal  |
| EG10467 | hupB | 90   | b0440 | FWD | 460675 | 460947 | pORF+_460675 | equal  | npORF+_460675 | 460675 | 460947 | equal  |
| EG11821 | amtB | 428  | b0451 | FWD | 472190 | 473476 |              |        |               |        |        |        |
| EG10051 | apt  | 183  | b0469 | FWD | 490636 | 491187 | pORF+_490582 | inside | npORF+_490582 | 490636 | 491187 | equal  |
| EG10245 | dnaX | 643  | b0470 | FWD | 491316 | 493247 | pORF+_491316 | equal  | npORF+_491316 | 491538 | 493247 | inside |
| EG10461 | htpG | 624  | b0473 | FWD | 494344 | 496218 | pORF+_494344 | equal  | npORF+_494344 | 494344 | 496218 | equal  |
| EG10032 | adk  | 214  | b0474 | FWD | 496399 | 497043 | pORF+_496339 | inside | npORF+_496339 | 496399 | 497043 | equal  |
| EG10431 | hemH | 320  | b0475 | FWD | 497279 | 498241 | pORF+_497279 | equal  | npORF+_497279 | 497648 | 498241 | inside |
| EG11102 | gsk  | 434  | b0477 | FWD | 499349 | 500653 | pORF+_499349 | equal  | npORF+_499349 | 499496 | 500653 | inside |
| EG11060 | ushA | 550  | b0480 | FWD | 504138 | 505790 | pORF+_504138 | equal  | npORF+_504138 | 504159 | 505790 | inside |
| EG11583 | gcl  | 593  | b0507 | FWD | 533140 | 534921 | pORF+_533050 | inside | npORF+_533050 | 533248 | 534921 | inside |
| EG10196 | cysS | 461  | b0526 | FWD | 553834 | 555219 | pORF+_553834 | equal  | npORF+_553834 | 553834 | 555219 | equal  |
| EG13628 | ybcL | 183  | b0545 | FWD | 570116 | 570667 |              |        |               |        |        |        |
| EG20283 | rusA | 120  | b0550 | FWD | 572594 | 572956 |              |        |               |        |        |        |
| EG14234 | cusF | 110  | b0573 | FWD | 596354 | 596686 | pORF+_596354 | equal  | npORF+_596354 | 596378 | 596686 | inside |
| EG10299 | fes  | 374  | b0585 | FWD | 612038 | 613162 | pORF+_611960 | inside | npORF+_611960 | 613004 | 613162 | inside |
| EG10264 | entF | 1293 | b0586 | FWD | 613380 | 617261 | pORF+_613242 | inside | npORF+_613242 | 613464 | 617261 | inside |
| EG10261 | entC | 391  | b0593 | FWD | 624108 | 625283 | pORF+_624096 | inside | npORF+_624096 | 624108 | 625283 | equal  |
| EG10259 | entA | 248  | b0596 | FWD | 627774 | 628520 | pORF+_627744 | inside | npORF+_627744 | 627774 | 628520 | equal  |
| EG11384 | ahpC | 187  | b0605 | FWD | 638168 | 638731 | pORF+_638168 | equal  | npORF+_638168 | 638174 | 638731 | inside |
| EG12180 | pagP | 186  | b0622 | FWD | 655780 | 656340 |              |        |               |        |        |        |
| EG12179 | cspE | 69   | b0623 | FWD | 656515 | 656724 | pORF+_656485 | inside | npORF+_656485 | 656515 | 656724 | equal  |
| EG10390 | glnS | 554  | b0680 | FWD | 705316 | 706980 | pORF+_705316 | equal  | npORF+_705316 | 705316 | 706980 | equal  |

|         |      |      |       |     |         |         |               |        |                |         |         |        |
|---------|------|------|-------|-----|---------|---------|---------------|--------|----------------|---------|---------|--------|
| EG12197 | seqA | 181  | b0687 | FWD | 712210  | 712755  | pORF+_712075  | inside | npORF+_712075  | 712210  | 712755  | equal  |
| EG10736 | phr  | 472  | b0708 | FWD | 738730  | 740148  |               |        |                |         |         |        |
| EG13237 | nei  | 263  | b0714 | FWD | 745158  | 745949  | pORF+_745158  | equal  | npORF+_745158  | 745386  | 745949  | inside |
| EG10931 | sdhA | 588  | b0723 | FWD | 755130  | 756896  | pORF+_755118  | inside | npORF+_755118  | 755130  | 756896  | equal  |
| EG10932 | sdhB | 238  | b0724 | FWD | 756912  | 757628  | pORF+_756912  | equal  | npORF+_756912  | 756912  | 757628  | equal  |
| EG10980 | sucB | 405  | b0727 | FWD | 760745  | 761962  | pORF+_760745  | equal  | npORF+_760745  | 760745  | 761962  | equal  |
| EG10981 | sucC | 388  | b0728 | FWD | 762237  | 763403  | pORF+_762237  | equal  | npORF+_762237  | 762237  | 763403  | equal  |
| EG10982 | sucD | 289  | b0729 | FWD | 763403  | 764272  | pORF+_763403  | equal  | npORF+_763403  | 763403  | 764272  | equal  |
| EG10173 | cydA | 522  | b0733 | FWD | 770681  | 772249  | pORF+_770678  | inside | npORF+_770678  | 771176  | 772249  | inside |
| EG11010 | tolQ | 230  | b0737 | FWD | 774376  | 775068  | pORF+_774376  | equal  | npORF+_774376  | 774445  | 775068  | inside |
| EG11008 | tolB | 430  | b0740 | FWD | 776963  | 778255  | pORF+_776960  | inside | npORF+_776960  | 776963  | 778255  | equal  |
| EG10079 | aroG | 350  | b0754 | FWD | 784856  | 785908  | pORF+_784856  | equal  | npORF+_784856  | 784856  | 785908  | equal  |
| EG12427 | modA | 257  | b0763 | FWD | 794312  | 795085  | pORF+_794312  | equal  | npORF+_794312  | 794333  | 795085  | inside |
| EG10118 | bioB | 346  | b0775 | FWD | 808567  | 809607  | pORF+_808567  | equal  | npORF+_808567  | 808567  | 809607  | equal  |
| EG10120 | bioD | 225  | b0778 | FWD | 811493  | 812170  | pORF+_811487  | inside | npORF+_811487  | 811493  | 812170  | equal  |
| EG11062 | uvrB | 673  | b0779 | FWD | 812749  | 814770  | pORF+_812749  | equal  | npORF+_812749  | 812749  | 814770  | equal  |
| EG11595 | moaA | 329  | b0781 | FWD | 816267  | 817256  | pORF+_816186  | inside | npORF+_816186  | 816591  | 817256  | inside |
| EG11596 | moaB | 170  | b0782 | FWD | 817278  | 817790  | pORF+_817278  | equal  | npORF+_817278  | 817278  | 817790  | equal  |
| EG11666 | moaC | 161  | b0783 | FWD | 817793  | 818278  | pORF+_817793  | equal  | npORF+_817793  | 817793  | 818278  | equal  |
| EG11597 | moaD | 81   | b0784 | FWD | 818271  | 818516  | pORF+_818208  | inside | npORF+_818208  | 818298  | 818516  | inside |
| EG11598 | moaE | 150  | b0785 | FWD | 818518  | 818970  | pORF+_818518  | equal  | npORF+_818518  | 818518  | 818970  | equal  |
| EG12135 | ompX | 171  | b0814 | FWD | 849673  | 850188  | pORF+_849667  | inside | npORF+_849667  | 849673  | 850188  | equal  |
| EG13471 | fsaA | 220  | b0825 | FWD | 862865  | 863527  | pORF+_862793  | inside | npORF+_862793  | 862901  | 863527  | inside |
| EG10203 | dacC | 400  | b0839 | FWD | 879950  | 881152  | pORF+_879929  | inside | npORF+_879929  | 879950  | 881152  | equal  |
| EG11629 | potF | 370  | b0854 | FWD | 893007  | 894119  | pORF+_892857  | inside | npORF+_892857  | 893058  | 894119  | inside |
| EG13694 | macA | 371  | b0878 | FWD | 918458  | 919573  | pORF+_918431  | inside | npORF+_918431  | 918686  | 919573  | inside |
| EG10156 | clpA | 758  | b0882 | FWD | 922487  | 924763  | pORF+_922472  | inside | npORF+_922472  | 922520  | 924763  | inside |
| EG10547 | lrp  | 164  | b0889 | FWD | 931818  | 932312  | pORF+_931764  | inside | npORF+_931764  | 931818  | 932312  | equal  |
| EG12684 | lolA | 203  | b0891 | FWD | 936595  | 937206  | pORF+_936592  | inside | npORF+_936592  | 936595  | 937206  | equal  |
| EG10232 | dmsA | 814  | b0894 | FWD | 940182  | 942626  | pORF+_940182  | equal  | npORF+_940182  | 940551  | 942626  | inside |
| EG10233 | dmsB | 205  | b0895 | FWD | 942637  | 943254  | pORF+_942637  | equal  | npORF+_942637  | 942637  | 943254  | equal  |
| EG10946 | serC | 362  | b0907 | FWD | 956876  | 957964  | pORF+_956876  | equal  | npORF+_956876  | 956876  | 957964  | equal  |
| EG10073 | aroA | 427  | b0908 | FWD | 958035  | 959318  | pORF+_958035  | equal  | npORF+_958035  | 958035  | 959318  | equal  |
| EG10900 | rpsA | 557  | b0911 | FWD | 961218  | 962891  | pORF+_961218  | equal  | npORF+_961218  | 961218  | 962891  | equal  |
| EG10441 | ihfB | 94   | b0912 | FWD | 963051  | 963335  | pORF+_963051  | equal  | npORF+_963051  | 963051  | 963335  | equal  |
| EG10519 | kdsB | 248  | b0918 | FWD | 970075  | 970821  | pORF+_970075  | equal  | npORF+_970075  | 970075  | 970821  | equal  |
| EG10618 | mukB | 1486 | b0924 | FWD | 975549  | 980009  | pORF+_975549  | equal  | npORF+_975549  | 975549  | 980009  | equal  |
| EG10696 | pepN | 870  | b0932 | FWD | 989845  | 992457  | pORF+_989845  | equal  | npORF+_989845  | 989845  | 992457  | equal  |
| EG10807 | pyrD | 336  | b0945 | FWD | 1003991 | 1005001 | pORF+_1003964 | inside | npORF+_1003964 | 1003991 | 1005001 | equal  |
| EG50004 | rmf  | 55   | b0953 | FWD | 1014938 | 1015105 | pORF+_1014938 | equal  | npORF+_1014938 | 1014938 | 1015105 | equal  |
| EG10426 | helD | 684  | b0962 | FWD | 1023694 | 1025748 | pORF+_1023601 | inside | npORF+_1023601 | 1024204 | 1025748 | inside |
| EG13723 | ycuU | 137  | b0965 | FWD | 1027169 | 1027582 | pORF+_1027088 | inside | npORF+_1027088 | 1027169 | 1027582 | equal  |
| EG10468 | hyaA | 372  | b0972 | FWD | 1031362 | 1032480 | pORF+_1031335 | inside | npORF+_1031335 | 1032382 | 1032480 | inside |
| EG10469 | hyaB | 597  | b0973 | FWD | 1032477 | 1034270 | pORF+_1032477 | equal  | npORF+_1032477 | 1033704 | 1034270 | inside |
| EG10049 | appA | 432  | b0980 | FWD | 1039840 | 1041138 | pORF+_1039810 | inside | npORF+_1039810 | 1039960 | 1041138 | inside |
| EG12616 | torT | 342  | b0994 | FWD | 1055484 | 1056512 |               |        |                |         |         |        |

|         |      |      |       |     |         |         |               |        |                |         |         |        |
|---------|------|------|-------|-----|---------|---------|---------------|--------|----------------|---------|---------|--------|
| EG11814 | torA | 848  | b0997 | FWD | 1058479 | 1061025 | pORF+_1058479 | equal  | npORF+_1058479 | 1060561 | 1061025 | inside |
| EG10033 | agp  | 413  | b1002 | FWD | 1064808 | 1066049 | pORF+_1064784 | inside | npORF+_1064784 | 1064835 | 1066049 | inside |
| EG10802 | putP | 502  | b1015 | FWD | 1078528 | 1080036 | pORF+_1078528 | equal  | npORF+_1078528 | 1078900 | 1080036 | inside |
| EG11734 | phoH | 354  | b1020 | FWD | 1084215 | 1085279 | pORF+_1084215 | equal  | npORF+_1084215 | 1084683 | 1085279 | inside |
| EG13869 | ghrA | 312  | b1033 | FWD | 1097109 | 1098047 | pORF+_1097070 | inside | npORF+_1097070 | 1097109 | 1098047 | equal  |
| EG11489 | csgA | 151  | b1042 | FWD | 1103670 | 1104125 |               |        |                |         |         |        |
| EG11885 | opgG | 511  | b1048 | FWD | 1108558 | 1110093 | pORF+_1108540 | inside | npORF+_1108540 | 1108591 | 1110093 | inside |
| EG10890 | rpmF | 57   | b1089 | FWD | 1146590 | 1146763 | pORF+_1146590 | equal  | npORF+_1146590 | 1146590 | 1146763 | equal  |
| EG10277 | fabH | 317  | b1091 | FWD | 1147982 | 1148935 | pORF+_1147982 | equal  | npORF+_1147982 | 1147982 | 1148935 | equal  |
| EG11317 | fabD | 309  | b1092 | FWD | 1148951 | 1149880 | pORF+_1148951 | equal  | npORF+_1148951 | 1149014 | 1149880 | inside |
| EG50003 | acpP | 78   | b1094 | FWD | 1150838 | 1151074 | pORF+_1150838 | equal  | npORF+_1150838 | 1150838 | 1151074 | equal  |
| EG12606 | fabF | 413  | b1095 | FWD | 1151162 | 1152403 | pORF+_1151162 | equal  | npORF+_1151162 | 1151162 | 1152403 | equal  |
| EG11493 | pabC | 269  | b1096 | FWD | 1152523 | 1153332 |               |        |                |         |         |        |
| EG11500 | holB | 334  | b1099 | FWD | 1154985 | 1155989 | pORF+_1154985 | equal  | npORF+_1154985 | 1155186 | 1155989 | inside |
| EG10787 | ptsG | 477  | b1101 | FWD | 1157092 | 1158525 | pORF+_1157092 | equal  | npORF+_1157092 | 1157092 | 1158525 | equal  |
| EG10649 | ndh  | 434  | b1109 | FWD | 1165308 | 1166612 | pORF+_1165281 | inside | npORF+_1165281 | 1165320 | 1166612 | inside |
| EG13439 | lolC | 399  | b1116 | FWD | 1174650 | 1175849 |               |        |                |         |         |        |
| EG13440 | lolD | 233  | b1117 | FWD | 1175842 | 1176543 | pORF+_1175701 | inside | npORF+_1175701 | 1175953 | 1176543 | inside |
| EG13441 | lolE | 414  | b1118 | FWD | 1176543 | 1177787 | pORF+_1176543 | equal  | npORF+_1176543 | 1176885 | 1177787 | inside |
| EG13442 | nagK | 303  | b1119 | FWD | 1177816 | 1178727 | pORF+_1177756 | inside | npORF+_1177756 | 1178323 | 1178727 | inside |
| EG10489 | icd  | 416  | b1136 | FWD | 1194346 | 1195596 | pORF+_1194346 | equal  | npORF+_1194346 | 1194346 | 1195596 | equal  |
| EG10281 | fadR | 239  | b1187 | FWD | 1234161 | 1234880 | pORF+_1234137 | inside | npORF+_1234137 | 1234251 | 1234880 | inside |
| EG10518 | kdsA | 284  | b1215 | FWD | 1267388 | 1268242 | pORF+_1267388 | equal  | npORF+_1267388 | 1267388 | 1268242 | equal  |
| EG10638 | narG | 1247 | b1224 | FWD | 1279087 | 1282830 | pORF+_1279087 | equal  | npORF+_1279087 | 1279897 | 1282830 | inside |
| EG10639 | narH | 512  | b1225 | FWD | 1282827 | 1284365 | pORF+_1282827 | equal  | npORF+_1282827 | 1283229 | 1284365 | inside |
| EG10640 | narI | 225  | b1227 | FWD | 1285072 | 1285749 |               |        |                |         |         |        |
| EG11319 | galU | 302  | b1236 | FWD | 1290680 | 1291588 | pORF+_1290680 | equal  | npORF+_1290680 | 1290680 | 1291588 | equal  |
| EG10674 | oppA | 543  | b1243 | FWD | 1299206 | 1300837 | pORF+_1299134 | inside | npORF+_1299134 | 1299260 | 1300837 | inside |
| EG11124 | ompW | 212  | b1256 | FWD | 1312044 | 1312682 | pORF+_1312044 | equal  | npORF+_1312044 | 1312068 | 1312682 | inside |
| EG11013 | topA | 865  | b1274 | FWD | 1329072 | 1331669 | pORF+_1329030 | inside | npORF+_1329030 | 1329072 | 1331669 | equal  |
| EG10184 | cysB | 324  | b1275 | FWD | 1331879 | 1332853 | pORF+_1331879 | equal  | npORF+_1331879 | 1331993 | 1332853 | inside |
| EG11325 | acnA | 891  | b1276 | FWD | 1333855 | 1336530 | pORF+_1333855 | equal  | npORF+_1333855 | 1333855 | 1336530 | equal  |
| EG13909 | puuD | 254  | b1298 | FWD | 1359144 | 1359908 | pORF+_1359132 | inside | npORF+_1359132 | 1359183 | 1359908 | inside |
| EG10776 | pspA | 222  | b1304 | FWD | 1366103 | 1366771 | pORF+_1366103 | equal  | npORF+_1366103 | 1366103 | 1366771 | equal  |
| EG10780 | pspE | 104  | b1308 | FWD | 1367713 | 1368027 | pORF+_1367713 | equal  | npORF+_1367713 | 1367746 | 1368027 | inside |
| EG13428 | ompG | 301  | b1319 | FWD | 1379971 | 1380876 |               |        |                |         |         |        |
| EG11042 | tyrR | 513  | b1323 | FWD | 1384744 | 1386285 | pORF+_1384717 | inside | npORF+_1384717 | 1385035 | 1386285 | inside |
| EG13376 | mppA | 537  | b1329 | FWD | 1391251 | 1392864 | pORF+_1391230 | inside | npORF+_1391230 | 1391362 | 1392864 | inside |
| EG13179 | feaB | 499  | b1385 | FWD | 1445543 | 1447042 | pORF+_1445540 | inside | npORF+_1445540 | 1446425 | 1447042 | inside |
| EG10035 | aldA | 479  | b1415 | FWD | 1486256 | 1487695 | pORF+_1486256 | equal  | npORF+_1486256 | 1486256 | 1487695 | equal  |
| EG12859 | opgD | 551  | b1424 | FWD | 1494880 | 1496535 | pORF+_1494880 | equal  | npORF+_1494880 | 1494925 | 1496535 | inside |
| EG10680 | osmC | 143  | b1482 | FWD | 1554649 | 1555080 | pORF+_1554649 | equal  | npORF+_1554649 | 1554649 | 1555080 | equal  |
| EG13812 | tam  | 252  | b1519 | FWD | 1605370 | 1606128 | pORF+_1605370 | equal  | npORF+_1605370 | 1605370 | 1606128 | equal  |
| EG12345 | ydfG | 248  | b1539 | FWD | 1625541 | 1626287 | pORF+_1625526 | inside | npORF+_1625526 | 1625541 | 1626287 | equal  |
| EG13838 | ydfZ | 67   | b1541 | FWD | 1627239 | 1627442 | pORF+_1627239 | equal  | npORF+_1627239 | 1627239 | 1627442 | equal  |
| EG12447 | speG | 186  | b1584 | FWD | 1654208 | 1654768 | pORF+_1654208 | equal  | npORF+_1654208 | 1654208 | 1654768 | equal  |

|         |      |      |       |     |         |          |                |        |                 |         |         |        |
|---------|------|------|-------|-----|---------|----------|----------------|--------|-----------------|---------|---------|--------|
| EG13842 | ynfD | 101  | b1586 | FWD | 1655589 | 1655894  | pORF_+_1655547 | inside | npORF_+_1655547 | 1655589 | 1655894 | equal  |
| EG13847 | dmsD | 204  | b1591 | FWD | 1662530 | 1663144  | pORF_+_1662521 | inside | npORF_+_1662521 | 1662530 | 1663144 | equal  |
| EG12149 | asr  | 102  | b1597 | FWD | 1669400 | 1669708  | pORF_+_1669373 | inside | npORF_+_1669373 | 1669436 | 1669708 | inside |
| EG11038 | tus  | 309  | b1610 | FWD | 1682283 | 1683212  | pORF_+_1682271 | inside | npORF_+_1682271 | 1682493 | 1683212 | inside |
| EG10662 | nth  | 211  | b1633 | FWD | 1709547 | 1710182  | pORF_+_1709547 | equal  | npORF_+_1709547 | 1709640 | 1710182 | inside |
| EG12613 | gst  | 201  | b1635 | FWD | 1712401 | 1713006  | pORF_+_1712401 | equal  | npORF_+_1712401 | 1712407 | 1713006 | inside |
| EG13421 | gloA | 135  | b1651 | FWD | 1725861 | 1726268  | pORF_+_1725861 | equal  | npORF_+_1725861 | 1725861 | 1726268 | equal  |
| EG10954 | sodB | 193  | b1656 | FWD | 1733402 | 1733983  | pORF_+_1733402 | equal  | npORF_+_1733402 | 1733402 | 1733983 | equal  |
| EG11531 | cfa  | 382  | b1661 | FWD | 1739437 | 1740585  | pORF_+_1739437 | equal  | npORF_+_1739437 | 1739437 | 1740585 | equal  |
| EG10804 | pykF | 470  | b1676 | FWD | 1753722 | 1755134  | pORF_+_1753506 | inside | npORF_+_1753506 | 1753722 | 1755134 | equal  |
| EG10544 | lpp  | 78   | b1677 | FWD | 1755445 | 1755681  | pORF_+_1755445 | equal  | npORF_+_1755445 | 1755445 | 1755681 | equal  |
| EG10076 | aroD | 252  | b1693 | FWD | 1772710 | 1773468  | pORF_+_1772710 | equal  | npORF_+_1772710 | 1772710 | 1773468 | equal  |
| EG10080 | aroH | 348  | b1704 | FWD | 1786459 | 1787505  | pORF_+_1786336 | inside | npORF_+_1786336 | 1786459 | 1787505 | equal  |
| EG10700 | pfkB | 309  | b1723 | FWD | 1804394 | 1805323  | pORF_+_1804391 | inside | npORF_+_1804391 | 1804394 | 1805323 | equal  |
| EG10509 | katE | 753  | b1732 | FWD | 1811891 | 1814152  | pORF_+_1811891 | equal  | npORF_+_1811891 | 1811966 | 1814152 | inside |
| EG10663 | nadE | 275  | b1740 | FWD | 1820482 | 1821309  | pORF_+_1820482 | equal  | npORF_+_1820482 | 1820482 | 1821309 | equal  |
| EG10372 | gdhA | 447  | b1761 | FWD | 1840395 | 1841738  | pORF_+_1840395 | equal  | npORF_+_1840395 | 1840395 | 1841738 | equal  |
| EG10367 | gapA | 331  | b1779 | FWD | 1860795 | 1861790  | pORF_+_1860786 | inside | npORF_+_1860786 | 1860795 | 1861790 | equal  |
| EG12679 | yeaD | 294  | b1780 | FWD | 1861874 | 1862758  | pORF_+_1861853 | inside | npORF_+_1861853 | 1861874 | 1862758 | equal  |
| EG10930 | sdaA | 454  | b1814 | FWD | 1894956 | 1896320  | pORF_+_1894956 | equal  | npORF_+_1894956 | 1894983 | 1896320 | inside |
| EG10567 | manX | 323  | b1817 | FWD | 1900072 | 1901043  | pORF_+_1900072 | equal  | npORF_+_1900072 | 1900072 | 1901043 | equal  |
| EG11505 | holE | 76   | b1842 | FWD | 1923132 | 19233045 | pORF_+_1923045 | inside | npORF_+_1923045 | 1923177 | 1923362 | inside |
| EG11809 | purT | 392  | b1849 | FWD | 1928905 | 1930083  | pORF_+_1928905 | equal  | npORF_+_1928905 | 1928905 | 1930083 | equal  |
| EG10803 | pykA | 480  | b1854 | FWD | 1935673 | 1937115  | pORF_+_1935532 | inside | npORF_+_1935532 | 1935673 | 1937115 | equal  |
| EG10071 | argS | 577  | b1876 | FWD | 1958086 | 1959819  | pORF_+_1958086 | equal  | npORF_+_1958086 | 1958086 | 1959819 | equal  |
| EG10921 | ftnA | 165  | b1905 | FWD | 1986740 | 1987237  | pORF_+_1986725 | inside | npORF_+_1986725 | 1986818 | 1987237 | inside |
| EG10820 | rcsA | 207  | b1951 | FWD | 2021992 | 2022615  | pORF_+_2021992 | equal  | npORF_+_2021992 | 2022439 | 2022615 | inside |
| EG11755 | hchA | 283  | b1967 | FWD | 2033859 | 2034710  | pORF_+_2033859 | equal  | npORF_+_2033859 | 2033859 | 2034710 | equal  |
| EG14047 | yedY | 334  | b1971 | FWD | 2037502 | 2038506  | pORF_+_2037502 | equal  | npORF_+_2037502 | 2037613 | 2038506 | inside |
| EG14049 | yodA | 216  | b1973 | FWD | 2039399 | 2040049  | pORF_+_2039399 | equal  | npORF_+_2039399 | 2039399 | 2040049 | equal  |
| EG10039 | amn  | 484  | b1982 | FWD | 2053085 | 2054539  | pORF_+_2052929 | inside | npORF_+_2052929 | 2053085 | 2054539 | equal  |
| EG12686 | flu  | 1039 | b2000 | FWD | 2069563 | 2072682  | pORF_+_2069407 | inside | npORF_+_2069407 | 2069929 | 2072682 | inside |
| EG10926 | sbcB | 475  | b2011 | FWD | 2080780 | 2082207  | pORF_+_2080708 | inside | npORF_+_2080708 | 2080783 | 2082207 | inside |
| EG10447 | hisD | 434  | b2020 | FWD | 2089121 | 2090425  | pORF_+_2089112 | inside | npORF_+_2089112 | 2089121 | 2090425 | equal  |
| EG10445 | hisB | 355  | b2022 | FWD | 2091492 | 2092559  | pORF_+_2091489 | inside | npORF_+_2091489 | 2091492 | 2092559 | equal  |
| EG10586 | metG | 677  | b2114 | FWD | 2192322 | 2194355  | pORF_+_2192313 | inside | npORF_+_2192313 | 2192442 | 2194355 | inside |
| EG10231 | dld  | 571  | b2133 | FWD | 2220207 | 2221922  | pORF_+_2220174 | inside | npORF_+_2220174 | 2220207 | 2221922 | equal  |
| EG10137 | cdd  | 294  | b2143 | FWD | 2229866 | 2230750  | pORF_+_2229866 | equal  | npORF_+_2229866 | 2229866 | 2230750 | equal  |
| EG14074 | yeiT | 412  | b2146 | FWD | 2232055 | 2233293  | pORF_+_2232055 | equal  | npORF_+_2232055 | 2233057 | 2233293 | inside |
| EG11289 | yeiA | 411  | b2147 | FWD | 2233287 | 2234522  |                |        |                 |         |         |        |
| EG10885 | rplY | 94   | b2185 | FWD | 2280539 | 2280823  | pORF_+_2280443 | inside | npORF_+_2280443 | 2280539 | 2280823 | equal  |
| EG10255 | eco  | 162  | b2209 | FWD | 2301927 | 2302415  | pORF_+_2301906 | inside | npORF_+_2301906 | 2302044 | 2302415 | inside |
| EG10660 | nrdA | 761  | b2234 | FWD | 2342887 | 2345172  | pORF_+_2342887 | equal  | npORF_+_2342887 | 2342887 | 2345172 | equal  |
| EG10661 | nrdB | 376  | b2235 | FWD | 2345406 | 2346536  | pORF_+_2345175 | inside | npORF_+_2345175 | 2345406 | 2346536 | equal  |
| EG10391 | glpA | 542  | b2241 | FWD | 2350669 | 2352297  | pORF_+_2350669 | equal  | npORF_+_2350669 | 2350774 | 2352297 | inside |
| EG10392 | glpB | 419  | b2242 | FWD | 2352287 | 2353546  | pORF_+_2352059 | inside | npORF_+_2352059 | 2352308 | 2353546 | inside |

|         |      |     |       |     |         |         |                |        |                 |         |         |        |
|---------|------|-----|-------|-----|---------|---------|----------------|--------|-----------------|---------|---------|--------|
| EG10393 | glpC | 396 | b2243 | FWD | 2353543 | 2354733 |                |        |                 |         |         |        |
| EG14091 | arnA | 660 | b2255 | FWD | 2366061 | 2368043 |                |        |                 |         |         |        |
| EG20173 | pta  | 714 | b2297 | FWD | 2412769 | 2414913 | pORF_+_2412769 | equal  | npORF_+_2412769 | 2412769 | 2414913 | equal  |
| EG14263 | folX | 120 | b2303 | FWD | 2419347 | 2419709 | pORF_+_2419347 | equal  | npORF_+_2419347 | 2419389 | 2419709 | inside |
| EG10280 | fadL | 446 | b2344 | FWD | 2459328 | 2460668 | pORF_+_2459322 | inside | npORF_+_2459322 | 2459373 | 2460668 | inside |
| EG10249 | dsdA | 442 | b2366 | FWD | 2477224 | 2478552 | pORF_+_2477224 | equal  | npORF_+_2477224 | 2477239 | 2478552 | inside |
| EG10192 | cysK | 323 | b2414 | FWD | 2530431 | 2531402 | pORF_+_2530431 | equal  | npORF_+_2530431 | 2530431 | 2531402 | equal  |
| EG10788 | ptsH | 85  | b2415 | FWD | 2531786 | 2532043 | pORF_+_2531786 | equal  | npORF_+_2531786 | 2531786 | 2532043 | equal  |
| EG10789 | ptsI | 575 | b2416 | FWD | 2532088 | 2533815 | pORF_+_2532088 | equal  | npORF_+_2532088 | 2532088 | 2533815 | equal  |
| EG10165 | crr  | 169 | b2417 | FWD | 2533856 | 2534365 | pORF_+_2533856 | equal  | npORF_+_2533856 | 2533856 | 2534365 | equal  |
| EG11149 | gcvR | 190 | b2479 | FWD | 2597928 | 2598500 | pORF_+_2597862 | inside | npORF_+_2597862 | 2597928 | 2598500 | equal  |
| EG10108 | bcp  | 156 | b2480 | FWD | 2598500 | 2598970 | pORF_+_2598500 | equal  | npORF_+_2598500 | 2598500 | 2598970 | equal  |
| EG10798 | purM | 345 | b2499 | FWD | 2619219 | 2620256 | pORF_+_2619204 | inside | npORF_+_2619204 | 2619219 | 2620256 | equal  |
| EG10799 | purN | 212 | b2500 | FWD | 2620256 | 2620894 | pORF_+_2620256 | equal  | npORF_+_2620256 | 2620268 | 2620894 | inside |
| EG11510 | ppk  | 688 | b2501 | FWD | 2621066 | 2623132 | pORF_+_2621060 | inside | npORF_+_2621060 | 2621126 | 2623132 | inside |
| EG11403 | ppx  | 513 | b2502 | FWD | 2623137 | 2624678 | pORF_+_2623098 | inside | npORF_+_2623098 | 2623137 | 2624678 | equal  |
| EG11072 | xseA | 456 | b2509 | FWD | 2632254 | 2633624 | pORF_+_2632254 | equal  | npORF_+_2632254 | 2632461 | 2633624 | inside |
| EG11600 | sseA | 281 | b2521 | FWD | 2650516 | 2651361 | pORF_+_2650357 | inside | npORF_+_2650357 | 2650516 | 2651361 | equal  |
| EG10456 | hmp  | 396 | b2552 | FWD | 2683857 | 2685047 | pORF_+_2683836 | inside | npORF_+_2683836 | 2683950 | 2685047 | inside |
| EG10631 | nadB | 540 | b2574 | FWD | 2708442 | 2710064 | pORF_+_2708442 | equal  | npORF_+_2708442 | 2708475 | 2710064 | inside |
| EG11058 | ung  | 229 | b2580 | FWD | 2714776 | 2715465 | pORF_+_2714776 | equal  | npORF_+_2714776 | 2714776 | 2715465 | equal  |
| EG10781 | pssA | 451 | b2585 | FWD | 2720749 | 2722104 | pORF_+_2720746 | inside | npORF_+_2720746 | 2720752 | 2722104 | inside |
| EG11151 | raiA | 113 | b2597 | FWD | 2735176 | 2735517 | pORF_+_2735176 | equal  | npORF_+_2735176 | 2735176 | 2735517 | equal  |
| EG12192 | nadK | 292 | b2615 | FWD | 2748853 | 2749731 | pORF_+_2748853 | equal  | npORF_+_2748853 | 2748925 | 2749731 | inside |
| EG11782 | smpB | 160 | b2620 | FWD | 2752918 | 2753400 | pORF_+_2752918 | equal  | npORF_+_2752918 | 2752918 | 2753400 | equal  |
| EG13523 | csiD | 325 | b2659 | FWD | 2787007 | 2787984 |                |        |                 |         |         |        |
| EG10361 | gabT | 426 | b2662 | FWD | 2790757 | 2792037 | pORF_+_2790751 | inside | npORF_+_2790751 | 2790757 | 2792037 | equal  |
| EG10773 | proX | 330 | b2679 | FWD | 2805154 | 2806146 | pORF_+_2805112 | inside | npORF_+_2805112 | 2805154 | 2806146 | equal  |
| EG10971 | srlD | 259 | b2705 | FWD | 2825759 | 2826538 |                |        |                 |         |         |        |
| EG10484 | hypB | 290 | b2727 | FWD | 2849023 | 2849895 | pORF_+_2849023 | equal  | npORF_+_2849023 | 2849272 | 2849895 | inside |
| EG10485 | hypC | 90  | b2728 | FWD | 2849886 | 2850158 | pORF_+_2849859 | inside | npORF_+_2849859 | 2849886 | 2850158 | equal  |
| EG10352 | fucP | 438 | b2801 | FWD | 2932257 | 2933573 |                |        |                 |         |         |        |
| EG10349 | fucI | 591 | b2802 | FWD | 2933606 | 2935381 | pORF_+_2933606 | equal  | npORF_+_2933606 | 2933900 | 2935381 | inside |
| EG10350 | fucK | 482 | b2803 | FWD | 2935460 | 2936908 |                |        |                 |         |         |        |
| EG13082 | csdA | 401 | b2810 | FWD | 2941359 | 2942564 |                |        |                 |         |         |        |
| EG10063 | argA | 443 | b2818 | FWD | 2947264 | 2948595 | pORF_+_2947198 | inside | npORF_+_2947198 | 2947264 | 2948595 | equal  |
| EG10624 | mutH | 229 | b2831 | FWD | 2967684 | 2968373 |                |        |                 |         |         |        |
| EG13062 | ssnA | 442 | b2879 | FWD | 3017183 | 3018511 |                |        |                 |         |         |        |
| EG12685 | ygfZ | 326 | b2898 | FWD | 3039335 | 3040315 | pORF_+_3039335 | equal  | npORF_+_3039335 | 3039335 | 3040315 | equal  |
| EG10490 | argP | 297 | b2916 | FWD | 3057775 | 3058668 | pORF_+_3057709 | inside | npORF_+_3057709 | 3057817 | 3058668 | inside |
| EG10589 | metK | 384 | b2942 | FWD | 3084728 | 3085882 | pORF_+_3084716 | inside | npORF_+_3084716 | 3084728 | 3085882 | equal  |
| EG10419 | gshB | 316 | b2947 | FWD | 3089900 | 3090850 | pORF_+_3089900 | equal  | npORF_+_3089900 | 3089900 | 3090850 | equal  |
| EG12984 | yggX | 91  | b2962 | FWD | 3102115 | 3102390 | pORF_+_3102115 | equal  | npORF_+_3102115 | 3102115 | 3102390 | equal  |
| EG10583 | metC | 395 | b3008 | FWD | 3150258 | 3151445 | pORF_+_3150123 | inside | npORF_+_3150123 | 3150258 | 3151445 | equal  |
| EG13015 | dkgA | 275 | b3012 | FWD | 3154645 | 3155472 | pORF_+_3154645 | equal  | npORF_+_3154645 | 3154645 | 3155472 | equal  |
| EG12656 | mdaB | 193 | b3028 | FWD | 3170552 | 3171133 | pORF_+_3170552 | equal  | npORF_+_3170552 | 3170552 | 3171133 | equal  |

|         |      |     |       |     |         |         |               |        |                |         |         |        |
|---------|------|-----|-------|-----|---------|---------|---------------|--------|----------------|---------|---------|--------|
| EG12657 | ygiN | 104 | b3029 | FWD | 3171164 | 3171478 | pORF+_3171164 | equal  | npORF+_3171164 | 3171164 | 3171478 | equal  |
| EG11009 | tolC | 493 | b3035 | FWD | 3176137 | 3177618 | pORF+_3176098 | inside | npORF+_3176098 | 3176191 | 3177618 | inside |
| EG13031 | yqiC | 96  | b3042 | FWD | 3182862 | 3183152 | pORF+_3182802 | inside | npORF+_3182802 | 3182913 | 3183152 | inside |
| EG10920 | rpsU | 71  | b3065 | FWD | 3208803 | 3209018 | pORF+_3208803 | equal  | npORF+_3208803 | 3208803 | 3209018 | equal  |
| EG10239 | dnaG | 581 | b3066 | FWD | 3209129 | 3210874 | pORF+_3209129 | equal  | npORF+_3209129 | 3209417 | 3210874 | inside |
| EG10896 | rpoD | 613 | b3067 | FWD | 3211069 | 3212910 | pORF+_3211069 | equal  | npORF+_3211069 | 3211069 | 3212910 | equal  |
| EG10252 | ebgA |     | b3076 | FWD | 3220655 | 3223747 |               |        |                |         |         |        |
| EG12723 | fadH | 672 | b3081 | FWD | 3229687 | 3231705 | pORF+_3229687 | equal  | npORF+_3229687 | 3229687 | 3231705 | equal  |
| EG10068 | argG | 447 | b3172 | FWD | 3316659 | 3318002 | pORF+_3316659 | equal  | npORF+_3316659 | 3316659 | 3318002 | equal  |
| EG10202 | dacB | 477 | b3182 | FWD | 3326985 | 3328418 | pORF+_3326985 | equal  | npORF+_3326985 | 3327012 | 3328418 | inside |
| EG12804 | kdsC | 188 | b3198 | FWD | 3340295 | 3340861 | pORF+_3340295 | equal  | npORF+_3340295 | 3340295 | 3340861 | equal  |
| EG12618 | lptA | 185 | b3200 | FWD | 3341402 | 3341959 | pORF+_3341381 | inside | npORF+_3341381 | 3341402 | 3341959 | equal  |
| EG11680 | lptB | 241 | b3201 | FWD | 3341966 | 3342691 | pORF+_3341966 | equal  | npORF+_3341966 | 3342017 | 3342691 | inside |
| EG11681 | hpf  | 95  | b3203 | FWD | 3344195 | 3344482 | pORF+_3344111 | inside | npORF+_3344111 | 3344195 | 3344482 | equal  |
| EG10404 | gltD | 472 | b3213 | FWD | 3357220 | 3358638 | pORF+_3357220 | equal  | npORF+_3357220 | 3357220 | 3358638 | equal  |
| EG11514 | gltF | 254 | b3214 | FWD | 3359198 | 3359962 |               |        |                |         |         |        |
| EG12612 | degQ | 455 | b3234 | FWD | 3378765 | 3380132 | pORF+_3378723 | inside | npORF+_3378723 | 3378786 | 3380132 | inside |
| EG10070 | argR | 156 | b3237 | FWD | 3382725 | 3383195 | pORF+_3382725 | equal  | npORF+_3382725 | 3382725 | 3383195 | equal  |
| EG10275 | accB | 156 | b3255 | FWD | 3403458 | 3403928 | pORF+_3403458 | equal  | npORF+_3403458 | 3403458 | 3403928 | equal  |
| EG10276 | accC | 449 | b3256 | FWD | 3403939 | 3405288 | pORF+_3403900 | inside | npORF+_3403900 | 3403939 | 3405288 | equal  |
| EG10317 | fis  | 98  | b3261 | FWD | 3409293 | 3409589 | pORF+_3409293 | equal  | npORF+_3409293 | 3409293 | 3409589 | equal  |
| EG11440 | def  | 169 | b3287 | FWD | 3431712 | 3432221 | pORF+_3431712 | equal  | npORF+_3431712 | 3431712 | 3432221 | equal  |
| EG11268 | fmt  | 315 | b3288 | FWD | 3432236 | 3433183 | pORF+_3432236 | equal  | npORF+_3432236 | 3432236 | 3433183 | equal  |
| EG12163 | rsmB | 429 | b3289 | FWD | 3433229 | 3434518 | pORF+_3433208 | inside | npORF+_3433208 | 3433229 | 3434518 | equal  |
| EG11019 | trkA | 458 | b3290 | FWD | 3434540 | 3435916 | pORF+_3434540 | equal  | npORF+_3434540 | 3434921 | 3435916 | inside |
| EG11180 | mscL | 136 | b3291 | FWD | 3436046 | 3436456 | pORF+_3436046 | equal  | npORF+_3436046 | 3436325 | 3436456 | inside |
| EG10164 | crp  | 210 | b3357 | FWD | 3484142 | 3484774 | pORF+_3484142 | equal  | npORF+_3484142 | 3484187 | 3484774 | inside |
| EG10188 | cysG | 457 | b3368 | FWD | 3495850 | 3497223 | pORF+_3495850 | equal  | npORF+_3495850 | 3496216 | 3497223 | inside |
| EG12929 | hslR | 133 | b3400 | FWD | 3527370 | 3527771 | pORF+_3527370 | equal  | npORF+_3527370 | 3527370 | 3527771 | equal  |
| EG10688 | pck  | 540 | b3403 | FWD | 3530840 | 3532462 | pORF+_3530771 | inside | npORF+_3530771 | 3530858 | 3532462 | inside |
| EG11578 | greB | 158 | b3406 | FWD | 3534834 | 3535310 |               |        |                |         |         |        |
| EG10394 | glpD | 501 | b3426 | FWD | 3560036 | 3561541 | pORF+_3560021 | inside | npORF+_3560021 | 3560036 | 3561541 | equal  |
| EG12075 | nikA | 524 | b3476 | FWD | 3611690 | 3613264 | pORF+_3611690 | equal  | npORF+_3611690 | 3612254 | 3613264 | inside |
| EG11390 | uspA | 144 | b3495 | FWD | 3638134 | 3638568 | pORF+_3638134 | equal  | npORF+_3638134 | 3638134 | 3638568 | equal  |
| EG12245 | treF | 549 | b3519 | FWD | 3667615 | 3669264 |               |        |                |         |         |        |
| EG10986 | tag  | 187 | b3549 | FWD | 3711115 | 3711678 |               |        |                |         |         |        |
| EG12272 | ghrB | 324 | b3553 | FWD | 3715333 | 3716307 | pORF+_3715321 | inside | npORF+_3715321 | 3715333 | 3716307 | equal  |
| EG10166 | cspA | 70  | b3556 | FWD | 3718072 | 3718284 | pORF+_3718072 | equal  | npORF+_3718072 | 3718072 | 3718284 | equal  |
| EG20252 | xyfF | 330 | b3566 | FWD | 3729154 | 3730146 | pORF+_3729076 | inside | npORF+_3729076 | 3729664 | 3730146 | inside |
| EG11316 | malS | 676 | b3571 | FWD | 3735520 | 3737550 |               |        |                |         |         |        |
| EG10616 | mtlD | 382 | b3600 | FWD | 3772447 | 3773595 | pORF+_3772129 | inside | npORF+_3772129 | 3772447 | 3773595 | equal  |
| EG10838 | rfaD | 310 | b3619 | FWD | 3792010 | 3792942 | pORF+_3792010 | equal  | npORF+_3792010 | 3792010 | 3792942 | equal  |
| EG11189 | rfaC | 319 | b3621 | FWD | 3794002 | 3794961 |               |        |                |         |         |        |
| EG11190 | coaD | 159 | b3634 | FWD | 3807848 | 3808327 | pORF+_3807680 | inside | npORF+_3807680 | 3807848 | 3808327 | equal  |
| EG10004 | dfp  | 406 | b3639 | FWD | 3810754 | 3811974 | pORF+_3810682 | inside | npORF+_3810682 | 3810868 | 3811974 | inside |
| EG10899 | rpoZ | 91  | b3649 | FWD | 3820129 | 3820404 | pORF+_3820129 | equal  | npORF+_3820129 | 3820129 | 3820404 | equal  |

|         |      |      |       |     |         |         |               |        |                |         |         |        |
|---------|------|------|-------|-----|---------|---------|---------------|--------|----------------|---------|---------|--------|
| EG10892 | rpmH | 46   | b3703 | FWD | 3882359 | 3882499 | pORF+_3882359 | equal  | npORF+_3882359 | 3882359 | 3882499 | equal  |
| EG11005 | tnaA | 471  | b3708 | FWD | 3886753 | 3888168 | pORF+_3886738 | inside | npORF+_3886738 | 3886753 | 3888168 | equal  |
| EG10814 | rbsA | 501  | b3749 | FWD | 3931801 | 3933306 | pORF+_3931801 | equal  | npORF+_3931801 | 3931945 | 3933306 | inside |
| EG10815 | rbsB | 296  | b3751 | FWD | 3934301 | 3935191 | pORF+_3934295 | inside | npORF+_3934295 | 3934307 | 3935191 | inside |
| EG10818 | rbsK | 309  | b3752 | FWD | 3935317 | 3936246 | pORF+_3935290 | inside | npORF+_3935290 | 3935317 | 3936246 | equal  |
| EG10819 | rbsR | 330  | b3753 | FWD | 3936250 | 3937242 | pORF+_3936250 | equal  | npORF+_3936250 | 3936259 | 3937242 | inside |
| EG11450 | yifE | 112  | b3764 | FWD | 3946109 | 3946447 | pORF+_3946109 | equal  | npORF+_3946109 | 3946109 | 3946447 | equal  |
| EG10497 | ilvE | 309  | b3770 | FWD | 3950507 | 3951436 | pORF+_3950441 | inside | npORF+_3950441 | 3950507 | 3951436 | equal  |
| EG10496 | ilvD | 616  | b3771 | FWD | 3951501 | 3953351 | pORF+_3951501 | equal  | npORF+_3951501 | 3951543 | 3953351 | inside |
| EG10495 | ilvC | 491  | b3774 | FWD | 3955993 | 3957468 | pORF+_3955858 | inside | npORF+_3955858 | 3955993 | 3957468 | equal  |
| EG10837 | rep  | 673  | b3778 | FWD | 3958700 | 3960721 | pORF+_3958649 | inside | npORF+_3958649 | 3959057 | 3960721 | inside |
| EG11031 | trxA | 109  | b3781 | FWD | 3963784 | 3964113 | pORF+_3963679 | inside | npORF+_3963679 | 3963784 | 3964113 | equal  |
| EG10845 | rho  | 419  | b3783 | FWD | 3964440 | 3965699 | pORF+_3964368 | inside | npORF+_3964368 | 3964440 | 3965699 | equal  |
| EG11069 | xerC | 298  | b3811 | FWD | 3994310 | 3995206 | pORF+_3994310 | equal  | npORF+_3994310 | 3994475 | 3995206 | inside |
| EG11064 | uvrD | 720  | b3813 | FWD | 3996006 | 3998168 | pORF+_3995817 | inside | npORF+_3995817 | 3996057 | 3998168 | inside |
| EG10738 | pIdA | 289  | b3821 | FWD | 4002885 | 4003754 | pORF+_4002885 | equal  | npORF+_4002885 | 4003155 | 4003754 | inside |
| EG10833 | recQ | 609  | b3822 | FWD | 4003887 | 4005716 | pORF+_4003881 | inside | npORF+_4003881 | 4005615 | 4005716 | inside |
| EG10739 | pIdB | 340  | b3825 | FWD | 4007193 | 4008215 | pORF+_4007193 | equal  | npORF+_4007193 | 4007193 | 4008215 | equal  |
| EG10584 | metE | 753  | b3829 | FWD | 4011076 | 4013337 | pORF+_4011076 | equal  | npORF+_4011076 | 4011076 | 4013337 | equal  |
| EG11045 | udp  | 253  | b3831 | FWD | 4014454 | 4015215 | pORF+_4014448 | inside | npORF+_4014448 | 4014454 | 4015215 | equal  |
| EG11481 | tatD | 260  | b4483 | FWD | 4021577 | 4022359 |               |        |                |         |         |        |
| EG10334 | fre  | 233  | b3844 | FWD | 4024550 | 4025251 | pORF+_4024517 | inside | npORF+_4024517 | 4024571 | 4025251 | inside |
| EG11485 | hemG | 181  | b3850 | FWD | 4032631 | 4033176 | pORF+_4032631 | equal  | npORF+_4032631 | 4032631 | 4033176 | equal  |
| EG11830 | yihD | 89   | b3858 | FWD | 4040092 | 4040361 | pORF+_4040062 | inside | npORF+_4040062 | 4040092 | 4040361 | equal  |
| EG11297 | dsbA | 208  | b3860 | FWD | 4041441 | 4042067 | pORF+_4041441 | equal  | npORF+_4041441 | 4041663 | 4042067 | inside |
| EG11837 | typA | 607  | b3871 | FWD | 4056430 | 4058253 | pORF+_4056430 | equal  | npORF+_4056430 | 4056442 | 4058253 | inside |
| EG11852 | dtd  | 145  | b3887 | FWD | 4075038 | 4075475 | pORF+_4075038 | equal  | npORF+_4075038 | 4075302 | 4075475 | inside |
| EG10953 | sodA | 206  | b3908 | FWD | 4098833 | 4099453 | pORF+_4098827 | inside | npORF+_4098827 | 4098833 | 4099453 | equal  |
| EG10929 | sbp  | 329  | b3917 | FWD | 4106857 | 4107846 | pORF+_4106857 | equal  | npORF+_4106857 | 4106887 | 4107846 | inside |
| EG10889 | rpmE | 70   | b3936 | FWD | 4125036 | 4125248 | pORF+_4125036 | equal  | npORF+_4125036 | 4125036 | 4125248 | equal  |
| EG10582 | metB | 386  | b3939 | FWD | 4126695 | 4127855 | pORF+_4126518 | inside | npORF+_4126518 | 4126695 | 4127855 | equal  |
| EG10590 | metL | 810  | b3940 | FWD | 4127858 | 4130290 | pORF+_4127858 | equal  | npORF+_4127858 | 4127858 | 4130290 | equal  |
| EG10681 | oxyR | 305  | b3961 | FWD | 4156513 | 4157430 | pORF+_4156483 | inside | npORF+_4156483 | 4156513 | 4157430 | equal  |
| EG10126 | btuB | 614  | b3966 | FWD | 4161662 | 4163506 | pORF+_4161617 | inside | npORF+_4161617 | 4161662 | 4163506 | equal  |
| EG11037 | tufB | 394  | b3980 | FWD | 4173967 | 4175151 | pORF+_4173967 | equal  | npORF+_4173967 | 4173967 | 4175151 | equal  |
| EG10667 | nusG | 181  | b3982 | FWD | 4175766 | 4176311 | pORF+_4175766 | equal  | npORF+_4175766 | 4175766 | 4176311 | equal  |
| EG10872 | rplK | 142  | b3983 | FWD | 4176470 | 4176898 | pORF+_4176470 | equal  | npORF+_4176470 | 4176470 | 4176898 | equal  |
| EG10864 | rplA | 234  | b3984 | FWD | 4176902 | 4177606 | pORF+_4176902 | equal  | npORF+_4176902 | 4176902 | 4177606 | equal  |
| EG10871 | rplJ | 165  | b3985 | FWD | 4178019 | 4178516 | pORF+_4178019 | equal  | npORF+_4178019 | 4178019 | 4178516 | equal  |
| EG10873 | rplL | 121  | b3986 | FWD | 4178583 | 4178948 | pORF+_4178583 | equal  | npORF+_4178583 | 4178583 | 4178948 | equal  |
| EG10894 | rpoB | 1342 | b3987 | FWD | 4179268 | 4183296 | pORF+_4179235 | inside | npORF+_4179235 | 4179268 | 4183296 | equal  |
| EG10895 | rpoC | 1407 | b3988 | FWD | 4183373 | 4187596 | pORF+_4183373 | equal  | npORF+_4183373 | 4183373 | 4187596 | equal  |
| EG11915 | nfi  | 223  | b3998 | FWD | 4196813 | 4197484 | pORF+_4196807 | inside | npORF+_4196807 | 4196960 | 4197484 | inside |
| EG10466 | hupA | 90   | b4000 | FWD | 4198304 | 4198576 | pORF+_4198304 | equal  | npORF+_4198304 | 4198304 | 4198576 | equal  |
| EG10022 | aceA | 434  | b4015 | FWD | 4215132 | 4216436 | pORF+_4215117 | inside | npORF+_4215117 | 4215132 | 4216436 | equal  |
| EG10026 | aceK | 578  | b4016 | FWD | 4216619 | 4218355 | pORF+_4216619 | equal  | npORF+_4216619 | 4216934 | 4218355 | inside |



|         |       |      |       |     |         |         |                |        |                 |         |         |        |
|---------|-------|------|-------|-----|---------|---------|----------------|--------|-----------------|---------|---------|--------|
| EG10587 | methH | 1227 | b4019 | FWD | 4221851 | 4225534 | pORF_+_4221830 | inside | npORF_+_4221830 | 4221851 | 4225534 | equal  |
| EG10528 | lamB  | 446  | b4036 | FWD | 4245994 | 4247334 | pORF_+_4245994 | equal  | npORF_+_4245994 | 4245994 | 4247334 | equal  |
| EG11369 | ubiC  | 165  | b4039 | FWD | 4250529 | 4251026 | pORF_+_4250418 | inside | npORF_+_4250418 | 4250856 | 4251026 | inside |
| EG10224 | dgkA  | 122  | b4042 | FWD | 4254660 | 4255028 | pORF_+_4254660 | equal  | npORF_+_4254660 | 4254660 | 4255028 | equal  |
| EG11928 | yjbJ  | 69   | b4045 | FWD | 4257260 | 4257469 | pORF_+_4257254 | inside | npORF_+_4257254 | 4257260 | 4257469 | equal  |
| EG10236 | dnaB  | 471  | b4052 | FWD | 4262337 | 4263752 | pORF_+_4262337 | equal  | npORF_+_4262337 | 4262337 | 4263752 | equal  |
| EG11040 | tyrB  | 397  | b4054 | FWD | 4265137 | 4266330 | pORF_+_4265095 | inside | npORF_+_4265095 | 4265137 | 4266330 | equal  |
| EG11934 | aphA  | 237  | b4055 | FWD | 4267437 | 4268150 | pORF_+_4267197 | inside | npORF_+_4267197 | 4267476 | 4268150 | inside |
| EG11936 | yjbR  | 118  | b4057 | FWD | 4268681 | 4269037 | pORF_+_4268681 | equal  | npORF_+_4268681 | 4268681 | 4269037 | equal  |
| EG10976 | ssb   | 178  | b4059 | FWD | 4272148 | 4272684 | pORF_+_4272085 | inside | npORF_+_4272085 | 4272148 | 4272684 | equal  |
| EG11781 | nrfA  | 478  | b4070 | FWD | 4285787 | 4287223 | pORF_+_4285754 | inside | npORF_+_4285754 | 4285829 | 4287223 | inside |
| EG11945 | nrfB  | 188  | b4071 | FWD | 4287268 | 4287834 |                |        |                 |         |         |        |
| EG10577 | meIA  | 451  | b4119 | FWD | 4339934 | 4341289 | pORF_+_4339934 | equal  | npORF_+_4339934 | 4340090 | 4341289 | inside |
| EG10600 | groS  | 97   | b4142 | FWD | 4368711 | 4369004 | pORF_+_4368711 | equal  | npORF_+_4368711 | 4368711 | 4369004 | equal  |
| EG10599 | groL  | 548  | b4143 | FWD | 4369048 | 4370694 | pORF_+_4369048 | equal  | npORF_+_4369048 | 4369048 | 4370694 | equal  |
| EG12099 | efp   | 188  | b4147 | FWD | 4373722 | 4374288 | pORF_+_4373722 | equal  | npORF_+_4373722 | 4373722 | 4374288 | equal  |
| EG12480 | orn   | 181  | b4162 | FWD | 4389627 | 4390172 | pORF_+_4389483 | inside | npORF_+_4389483 | 4389627 | 4390172 | equal  |
| EG10438 | hfq   | 102  | b4172 | FWD | 4398311 | 4398619 | pORF_+_4398311 | equal  | npORF_+_4398311 | 4398311 | 4398619 | equal  |
| EG10790 | purA  | 432  | b4177 | FWD | 4402710 | 4404008 | pORF_+_4402710 | equal  | npORF_+_4402710 | 4402710 | 4404008 | equal  |
| EG11259 | rnr   | 813  | b4179 | FWD | 4404677 | 4407118 | pORF_+_4404635 | inside | npORF_+_4404635 | 4404677 | 4407118 | equal  |
| EG12496 | ulaD  | 216  | b4196 | FWD | 4420209 | 4420859 | pORF_+_4420011 | inside | npORF_+_4420011 | 4420533 | 4420859 | inside |
| EG10905 | rpsF  | 135  | b4200 | FWD | 4423141 | 4423536 | pORF_+_4423141 | equal  | npORF_+_4423141 | 4423141 | 4423536 | equal  |
| EG10764 | priB  | 104  | b4201 | FWD | 4423543 | 4423857 |                |        |                 |         |         |        |
| EG10917 | rpsR  | 75   | b4202 | FWD | 4423862 | 4424089 | pORF_+_4423862 | equal  | npORF_+_4423862 | 4423862 | 4424089 | equal  |
| EG10870 | rplI  | 149  | b4203 | FWD | 4424131 | 4424580 | pORF_+_4424131 | equal  | npORF_+_4424131 | 4424131 | 4424580 | equal  |
| EG12503 | fkIB  | 206  | b4207 | FWD | 4426958 | 4427578 | pORF_+_4426799 | inside | npORF_+_4426799 | 4427012 | 4427578 | inside |
| EG12517 | ytfQ  | 318  | b4227 | FWD | 4447985 | 4448941 | pORF_+_4447985 | equal  | npORF_+_4447985 | 4448042 | 4448941 | inside |
| EG10308 | fimA  | 182  | b4314 | FWD | 4541138 | 4541686 | pORF_+_4541138 | equal  | npORF_+_4541138 | 4541138 | 4541686 | equal  |
| EG10311 | fimD  | 878  | b4317 | FWD | 4543119 | 4545755 |                |        |                 |         |         |        |
| EG10315 | fimH  | 300  | b4320 | FWD | 4546831 | 4547733 | pORF_+_4546822 | inside | npORF_+_4546822 | 4547566 | 4547733 | inside |
| EG11414 | holD  | 137  | b4372 | FWD | 4605826 | 4606239 | pORF_+_4605826 | equal  | npORF_+_4605826 | 4605898 | 4606239 | inside |
| EG11391 | osmY  | 201  | b4376 | FWD | 4609419 | 4610024 | pORF_+_4609341 | inside | npORF_+_4609341 | 4609467 | 4610024 | inside |
| EG10221 | deoC  | 259  | b4381 | FWD | 4615346 | 4616125 | pORF_+_4615322 | inside | npORF_+_4615322 | 4615346 | 4616125 | equal  |
| EG10220 | deoB  | 407  | b4383 | FWD | 4617626 | 4618849 | pORF_+_4617626 | equal  | npORF_+_4617626 | 4617626 | 4618849 | equal  |
| EG10222 | deoD  | 239  | b4384 | FWD | 4618906 | 4619625 | pORF_+_4618849 | inside | npORF_+_4618849 | 4618906 | 4619625 | equal  |
| EG10950 | slt   | 645  | b4392 | FWD | 4628756 | 4630693 | pORF_+_4628726 | inside | npORF_+_4628726 | 4629002 | 4630693 | inside |
| EG11029 | trpR  | 108  | b4393 | FWD | 4630783 | 4631109 | pORF_+_4630783 | equal  | npORF_+_4630783 | 4630783 | 4631109 | equal  |
| EG10919 | rpsT  | 87   | b0023 | REV | 20815   | 21078   | pORF_-_20815   | equal  | npORF_-_20815   | 20815   | 21078   | equal  |
| EG11559 | caiB  | 405  | b0038 | REV | 37898   | 39115   |                |        |                 |         |         |        |
| EG11560 | caiA  | 380  | b0039 | REV | 39244   | 40386   |                |        |                 |         |         |        |
| EG10048 | apaH  | 280  | b0049 | REV | 50380   | 51222   | pORF_-_50380   | equal  | npORF_-_50380   | 50380   | 51039   | inside |
| EG10985 | surA  | 428  | b0053 | REV | 53416   | 54702   | pORF_-_53416   | equal  | npORF_-_53416   | 53416   | 54666   | inside |
| EG11569 | lptD  | 784  | b0054 | REV | 54755   | 57109   | pORF_-_54755   | equal  | npORF_-_54755   | 54755   | 57076   | inside |
| EG12609 | rluA  | 219  | b0058 | REV | 59687   | 60346   | pORF_-_59687   | inside | npORF_-_59687   | 59687   | 60244   | inside |
| EG11083 | hepA  | 968  | b0059 | REV | 60358   | 63264   | pORF_-_60358   | equal  | npORF_-_60358   | 60358   | 63192   | inside |
| EG10747 | poiB  | 783  | b0060 | REV | 63429   | 65780   |                |        |                 |         |         |        |

|         |      |      |       |     |        |        |               |        |                |        |        |        |
|---------|------|------|-------|-----|--------|--------|---------------|--------|----------------|--------|--------|--------|
| EG10055 | araD | 231  | b0061 | REV | 65855  | 66550  | pORF_-_65855  | equal  | npORF_-_65855  | 65855  | 66355  | inside |
| EG10053 | araB | 566  | b0063 | REV | 68348  | 70048  | pORF_-_68348  | equal  | npORF_-_68348  | 68348  | 70048  | equal  |
| EG11574 | thiB | 327  | b0068 | REV | 74497  | 75480  | pORF_-_74497  | inside | npORF_-_74497  | 74497  | 75366  | inside |
| EG11575 | leuD | 201  | b0071 | REV | 78848  | 79453  | pORF_-_78848  | equal  | npORF_-_78848  | 78848  | 79453  | equal  |
| EG11576 | leuC | 466  | b0072 | REV | 79464  | 80864  | pORF_-_79464  | equal  | npORF_-_79464  | 79464  | 80864  | equal  |
| EG11577 | leuB | 363  | b0073 | REV | 80867  | 81958  | pORF_-_80867  | inside | npORF_-_80867  | 80867  | 81958  | equal  |
| EG11226 | leuA | 523  | b0074 | REV | 81958  | 83529  | pORF_-_81958  | equal  | npORF_-_81958  | 81958  | 83529  | equal  |
| EG10962 | speD | 264  | b0120 | REV | 134788 | 135582 | pORF_-_134788 | equal  | npORF_-_134788 | 134788 | 135582 | equal  |
| EG10963 | speE | 288  | b0121 | REV | 135598 | 136464 | pORF_-_135598 | equal  | npORF_-_135598 | 135598 | 136464 | equal  |
| EG10369 | gcd  | 796  | b0124 | REV | 138835 | 141225 | pORF_-_138835 | inside | npORF_-_138835 | 138835 | 140853 | inside |
| EG11747 | panD | 126  | b0131 | REV | 146314 | 146694 | pORF_-_146314 | equal  | npORF_-_146314 | 146314 | 146694 | equal  |
| EG11675 | panB | 264  | b0134 | REV | 148807 | 149601 | pORF_-_148807 | equal  | npORF_-_148807 | 148807 | 149601 | equal  |
| EG11374 | folK | 159  | b0142 | REV | 157253 | 157732 | pORF_-_157253 | equal  | npORF_-_157253 | 157253 | 157726 | inside |
| EG10690 | pcnB | 465  | b0143 | REV | 157729 | 159126 | pORF_-_157729 | inside | npORF_-_157729 | 157729 | 159093 | inside |
| EG10230 | dksA | 151  | b0145 | REV | 160149 | 160604 | pORF_-_160149 | inside | npORF_-_160149 | 160149 | 160604 | equal  |
| EG12330 | ligT | 176  | b0147 | REV | 161501 | 162031 |               |        |                |        |        |        |
| EG12334 | btuF | 266  | b0158 | REV | 177662 | 178462 |               |        |                |        |        |        |
| EG10207 | dapD | 274  | b0166 | REV | 185123 | 185947 | pORF_-_185123 | equal  | npORF_-_185123 | 185123 | 185947 | equal  |
| EG10570 | map  | 264  | b0168 | REV | 188712 | 189506 | pORF_-_188712 | equal  | npORF_-_188712 | 188712 | 189506 | equal  |
| EG13221 | rof  | 84   | b0189 | REV | 213678 | 213932 | pORF_-_213678 | inside | npORF_-_213678 | 213678 | 213827 | inside |
| EG10770 | proS | 572  | b0194 | REV | 217057 | 218775 | pORF_-_217057 | inside | npORF_-_217057 | 217057 | 218775 | equal  |
| EG10860 | rnhA | 155  | b0214 | REV | 235535 | 236002 | pORF_-_235535 | inside | npORF_-_235535 | 235535 | 235804 | inside |
| EG10695 | pepD | 485  | b0237 | REV | 254259 | 255716 | pORF_-_254259 | equal  | npORF_-_254259 | 254259 | 255716 | equal  |
| EG10729 | phoE | 351  | b0241 | REV | 258269 | 259324 | pORF_-_258269 | inside | npORF_-_258269 | 258269 | 259285 | inside |
| EG10067 | argF | 334  | b0273 | REV | 288525 | 289529 | pORF_-_288525 | equal  | npORF_-_288525 | 288525 | 289529 | equal  |
| EG13565 | matB | 195  | b0293 | REV | 309308 | 309895 | pORF_-_309308 | equal  | npORF_-_309308 | 309308 | 310051 | inside |
| EG10110 | betB | 490  | b0312 | REV | 326485 | 327957 | pORF_-_326485 | inside | npORF_-_326485 | 326485 | 327948 | inside |
| EG10524 | lacA | 203  | b0342 | REV | 360473 | 361084 | pORF_-_360473 | inside | npORF_-_360473 | 360473 | 360655 | inside |
| EG10527 | lacZ | 1024 | b0344 | REV | 362455 | 365529 |               |        |                |        |        |        |
| EG10525 | lacI | 360  | b0345 | REV | 365652 | 366734 | pORF_-_365652 | inside | npORF_-_365652 | 365652 | 366668 | inside |
| EG20276 | mhpR | 277  | b0346 | REV | 366811 | 367644 | pORF_-_366811 | inside | npORF_-_366811 | 366811 | 367503 | inside |
| EG50010 | frmA | 369  | b0356 | REV | 377686 | 378795 | pORF_-_377686 | equal  | npORF_-_377686 | 377686 | 378546 | inside |
| EG10428 | hemB | 324  | b0369 | REV | 387977 | 388951 | pORF_-_387977 | inside | npORF_-_387977 | 387977 | 388951 | equal  |
| EG10769 | proC | 269  | b0386 | REV | 404059 | 404868 | pORF_-_404059 | inside | npORF_-_404059 | 404059 | 404868 | equal  |
| EG12158 | rdgC | 303  | b0393 | REV | 408332 | 409243 | pORF_-_408332 | inside | npORF_-_408332 | 408332 | 409177 | inside |
| EG10927 | sbcC | 1048 | b0397 | REV | 411831 | 414977 | pORF_-_411831 | equal  | npORF_-_411831 | 411831 | 412463 | inside |
| EG11094 | sbcD | 400  | b0398 | REV | 414974 | 416176 | pORF_-_414974 | inside | npORF_-_414974 | 414974 | 415804 | inside |
| EG13612 | dxs  | 620  | b0420 | REV | 437539 | 439401 | pORF_-_437539 | equal  | npORF_-_437539 | 437539 | 439401 | equal  |
| EG10508 | ispA | 299  | b0421 | REV | 439426 | 440325 | pORF_-_439426 | equal  | npORF_-_439426 | 439426 | 440325 | equal  |
| EG10995 | tesB | 286  | b0452 | REV | 473525 | 474385 | pORF_-_473525 | inside | npORF_-_473525 | 473525 | 474385 | equal  |
| EG14239 | maa  | 183  | b0459 | REV | 478591 | 479142 | pORF_-_478591 | equal  | npORF_-_478591 | 478591 | 478680 | inside |
| EG10765 | priC | 175  | b0467 | REV | 489509 | 490036 | pORF_-_489509 | equal  | npORF_-_489509 | 489509 | 489967 | inside |
| EG11101 | aes  | 319  | b0476 | REV | 498238 | 499197 |               |        |                |        |        |        |
| EG13246 | copA | 834  | b0484 | REV | 508099 | 510603 | pORF_-_508099 | equal  | npORF_-_508099 | 508099 | 510603 | equal  |
| EG11542 | tesA | 208  | b0494 | REV | 518363 | 518989 | pORF_-_518363 | inside | npORF_-_518363 | 518363 | 518956 | inside |
| EG10796 | purK | 355  | b0522 | REV | 550750 | 551817 | pORF_-_550750 | equal  | npORF_-_550750 | 550750 | 552348 | inside |

|         |      |     |       |     |         |         |                |        |                 |         |         |        |
|---------|------|-----|-------|-----|---------|---------|----------------|--------|-----------------|---------|---------|--------|
| EG10793 | purE | 169 | b0523 | REV | 551814  | 552323  | pORF_-_551814  | inside | npORF_-_551814  | 551814  | 552284  | inside |
| EG10758 | ppiB | 164 | b0525 | REV | 553166  | 553660  | pORF_-_553166  | equal  | npORF_-_553166  | 553166  | 553660  | equal  |
| EG10328 | fold | 288 | b0529 | REV | 556098  | 556964  | pORF_-_556098  | equal  | npORF_-_556098  | 556098  | 556964  | equal  |
| EG10659 | nmpC | 365 | b0533 | REV | 575009  | 576048  |                |        |                 |         |         |        |
| EG10673 | ompT | 317 | b0565 | REV | 583903  | 584856  | pORF_-_583903  | equal  | npORF_-_583903  | 583903  | 584856  | equal  |
| EG20151 | nfsB | 217 | b0578 | REV | 603994  | 604647  | pORF_-_603994  | inside | npORF_-_603994  | 603994  | 604647  | equal  |
| EG10293 | fepA | 746 | b0584 | REV | 609477  | 611717  | pORF_-_609477  | inside | npORF_-_609477  | 609477  | 611687  | inside |
| EG10294 | fepB | 318 | b0592 | REV | 622777  | 623733  | pORF_-_622777  | equal  | npORF_-_622777  | 622777  | 623685  | inside |
| EG13535 | dsbG | 248 | b0604 | REV | 637050  | 637796  | pORF_-_637050  | inside | npORF_-_637050  | 637050  | 637583  | inside |
| EG12683 | uspG | 142 | b0607 | REV | 640662  | 641090  | pORF_-_640662  | equal  | npORF_-_640662  | 640662  | 641090  | equal  |
| EG10856 | rna  | 268 | b0611 | REV | 643420  | 644226  | pORF_-_643420  | inside | npORF_-_643420  | 643420  | 644151  | inside |
| EG11306 | lipA | 321 | b0628 | REV | 658474  | 659439  | pORF_-_658474  | equal  | npORF_-_658474  | 658474  | 659178  | inside |
| EG10201 | dacA | 403 | b0632 | REV | 661975  | 663186  | pORF_-_661975  | inside | npORF_-_661975  | 661975  | 663012  | inside |
| EG11412 | holA | 343 | b0640 | REV | 669797  | 670828  | pORF_-_669797  | equal  | npORF_-_669797  | 669797  | 670240  | inside |
| EG12700 | gltI | 302 | b0655 | REV | 686062  | 686970  | pORF_-_686062  | inside | npORF_-_686062  | 686062  | 686970  | equal  |
| EG10092 | asnB | 554 | b0674 | REV | 696736  | 698400  | pORF_-_696736  | inside | npORF_-_696736  | 696736  | 698319  | inside |
| EG10318 | fldA | 176 | b0684 | REV | 710158  | 710688  | pORF_-_710158  | inside | npORF_-_710158  | 710158  | 710688  | equal  |
| EG10517 | kdpE | 225 | b0694 | REV | 720279  | 720956  |                |        |                 |         |         |        |
| EG10402 | gltA | 427 | b0720 | REV | 752408  | 753691  | pORF_-_752408  | equal  | npORF_-_752408  | 752408  | 753691  | equal  |
| EG11699 | gpmA | 250 | b0755 | REV | 786066  | 786818  | pORF_-_786066  | inside | npORF_-_786066  | 786066  | 786818  | equal  |
| EG10363 | galK | 382 | b0757 | REV | 788054  | 789202  | pORF_-_788054  | equal  | npORF_-_788054  | 788054  | 789202  | equal  |
| EG10366 | galT | 348 | b0758 | REV | 789206  | 790252  | pORF_-_789206  | equal  | npORF_-_789206  | 789206  | 789931  | inside |
| EG10362 | galE | 338 | b0759 | REV | 790262  | 791278  | pORF_-_790262  | inside | npORF_-_790262  | 790262  | 791227  | inside |
| EG10386 | glnH | 248 | b0811 | REV | 846481  | 847227  | pORF_-_846481  | equal  | npORF_-_846481  | 846481  | 847227  | equal  |
| EG11415 | dps  | 167 | b0812 | REV | 847631  | 848134  | pORF_-_847631  | inside | npORF_-_847631  | 847631  | 848134  | equal  |
| EG13324 | ybiS | 306 | b0819 | REV | 854047  | 854967  | pORF_-_854047  | equal  | npORF_-_854047  | 854047  | 854748  | inside |
| EG10417 | grxA | 85  | b0849 | REV | 889719  | 889976  | pORF_-_889719  | inside | npORF_-_889719  | 889719  | 889976  | equal  |
| EG11628 | artJ | 243 | b0860 | REV | 899067  | 899798  | pORF_-_899067  | inside | npORF_-_899067  | 899067  | 899798  | equal  |
| EG11625 | artI | 243 | b0863 | REV | 901480  | 902211  | pORF_-_901480  | equal  | npORF_-_901480  | 901480  | 902679  | inside |
| EG13690 | ltaE | 333 | b0870 | REV | 907516  | 908517  | pORF_-_907516  | equal  | npORF_-_907516  | 907516  | 908517  | equal  |
| EG10754 | poxB | 572 | b0871 | REV | 908554  | 910272  | pORF_-_908554  | equal  | npORF_-_908554  | 908554  | 910221  | inside |
| EG11111 | cspD | 74  | b0880 | REV | 921589  | 921813  | pORF_-_921589  | inside | npORF_-_921589  | 921589  | 921813  | equal  |
| EG10504 | infA | 72  | b0884 | REV | 925448  | 925666  | pORF_-_925448  | equal  | npORF_-_925448  | 925448  | 925666  | equal  |
| EG11032 | trxB | 321 | b0888 | REV | 930308  | 931273  | pORF_-_930308  | inside | npORF_-_930308  | 930308  | 931273  | equal  |
| EG11241 | ycaC | 208 | b0897 | REV | 944154  | 944780  | pORF_-_944154  | equal  | npORF_-_944154  | 944154  | 944780  | equal  |
| EG10028 | pflA | 246 | b0902 | REV | 949563  | 950303  | pORF_-_949563  | inside | npORF_-_949563  | 949563  | 950303  | equal  |
| EG10701 | pflB | 760 | b0903 | REV | 950495  | 952777  | pORF_-_950495  | equal  | npORF_-_950495  | 950495  | 952777  | equal  |
| EG10096 | aspC | 396 | b0928 | REV | 983742  | 984932  | pORF_-_983742  | equal  | npORF_-_983742  | 983742  | 985097  | inside |
| EG10671 | ompF | 362 | b0929 | REV | 985117  | 986205  | pORF_-_985117  | equal  | npORF_-_985117  | 985117  | 986202  | inside |
| EG10094 | asnS | 466 | b0930 | REV | 986808  | 988208  | pORF_-_986808  | inside | npORF_-_986808  | 986808  | 988208  | equal  |
| EG10742 | pncB | 400 | b0931 | REV | 988377  | 989579  | pORF_-_988377  | inside | npORF_-_988377  | 988377  | 989579  | equal  |
| EG13706 | ssuD | 381 | b0935 | REV | 994066  | 995211  | pORF_-_994066  | equal  | npORF_-_994066  | 994066  | 994524  | inside |
| EG13708 | ssuE | 191 | b0937 | REV | 996160  | 996735  |                |        |                 |         |         |        |
| EG10273 | fabA | 172 | b0954 | REV | 1015175 | 1015693 | pORF_-_1015175 | inside | npORF_-_1015175 | 1015175 | 1015693 | equal  |
| EG10669 | ompA | 346 | b0957 | REV | 1018236 | 1019276 | pORF_-_1018236 | inside | npORF_-_1018236 | 1018236 | 1019249 | inside |
| EG12307 | mgsA | 152 | b0963 | REV | 1025780 | 1026238 | pORF_-_1025780 | inside | npORF_-_1025780 | 1025780 | 1026190 | inside |

|         |      |      |       |     |         |         |                |        |                 |         |         |        |
|---------|------|------|-------|-----|---------|---------|----------------|--------|-----------------|---------|---------|--------|
| EG13724 | hspQ | 105  | b0966 | REV | 1027627 | 1027944 | pORF_-_1027627 | inside | npORF_-_1027627 | 1027627 | 1027944 | equal  |
| EG11826 | etk  | 726  | b0981 | REV | 1041253 | 1043433 | pORF_-_1041253 | equal  | npORF_-_1041253 | 1041253 | 1041456 | inside |
| EG12615 | torR | 230  | b0995 | REV | 1056485 | 1057177 | pORF_-_1056485 | equal  | npORF_-_1056485 | 1056485 | 1057177 | equal  |
| EG12193 | cbpA | 306  | b1000 | REV | 1062078 | 1062998 | pORF_-_1062078 | equal  | npORF_-_1062078 | 1062078 | 1062998 | equal  |
| EG12703 | yccJ | 75   | b1003 | REV | 1066087 | 1066314 | pORF_-_1066087 | equal  | npORF_-_1066087 | 1066087 | 1066314 | equal  |
| EG11540 | wrbA | 198  | b1004 | REV | 1066335 | 1066931 | pORF_-_1066335 | equal  | npORF_-_1066335 | 1066335 | 1066931 | equal  |
| EG11820 | yceI | 191  | b1056 | REV | 1117124 | 1117699 | pORF_-_1117124 | equal  | npORF_-_1117124 | 1117124 | 1117660 | inside |
| EG10806 | pyrC | 348  | b1062 | REV | 1120784 | 1121830 | pORF_-_1120784 | equal  | npORF_-_1120784 | 1120784 | 1121830 | equal  |
| EG12688 | grxB | 215  | b1064 | REV | 1122630 | 1123277 | pORF_-_1122630 | equal  | npORF_-_1122630 | 1122630 | 1123277 | equal  |
| EG10859 | rne  | 1061 | b1084 | REV | 1140405 | 1143590 | pORF_-_1140405 | equal  | npORF_-_1140405 | 1140405 | 1143581 | inside |
| EG10306 | fhuE | 729  | b1102 | REV | 1158585 | 1160774 | pORF_-_1158585 | equal  | npORF_-_1158585 | 1158585 | 1160558 | inside |
| EG10752 | potD | 348  | b1123 | REV | 1181006 | 1182052 | pORF_-_1181006 | equal  | npORF_-_1181006 | 1181006 | 1182001 | inside |
| EG11314 | purB | 456  | b1131 | REV | 1189839 | 1191209 | pORF_-_1189839 | equal  | npORF_-_1189839 | 1189839 | 1191209 | equal  |
| EG10597 | minD | 270  | b1175 | REV | 1223772 | 1224584 | pORF_-_1223772 | equal  | npORF_-_1223772 | 1223772 | 1224584 | equal  |
| EG13243 | hlyE | 303  | b1182 | REV | 1228706 | 1229617 |                |        |                 |         |         |        |
| EG11017 | treA | 565  | b1197 | REV | 1244902 | 1246599 | pORF_-_1244902 | inside | npORF_-_1244902 | 1244902 | 1246518 | inside |
| EG11404 | ychF | 363  | b1203 | REV | 1255944 | 1257035 | pORF_-_1255944 | equal  | npORF_-_1255944 | 1255944 | 1257035 | equal  |
| EG10785 | pth  | 194  | b1204 | REV | 1257152 | 1257736 | pORF_-_1257152 | equal  | npORF_-_1257152 | 1257152 | 1257724 | inside |
| EG10774 | prs  | 315  | b1207 | REV | 1260151 | 1261098 | pORF_-_1260151 | inside | npORF_-_1260151 | 1260151 | 1261098 | equal  |
| EG11819 | purU | 280  | b1232 | REV | 1287005 | 1287847 | pORF_-_1287005 | equal  | npORF_-_1287005 | 1287005 | 1287847 | equal  |
| EG10457 | hns  | 137  | b1237 | REV | 1291732 | 1292145 | pORF_-_1291732 | equal  | npORF_-_1291732 | 1291732 | 1292145 | equal  |
| EG10031 | adhE | 891  | b1241 | REV | 1294669 | 1297344 | pORF_-_1294669 | equal  | npORF_-_1294669 | 1294669 | 1297344 | equal  |
| EG11607 | yciI | 98   | b1251 | REV | 1308593 | 1308889 | pORF_-_1308593 | inside | npORF_-_1308593 | 1308593 | 1308886 | inside |
| EG11125 | yciE | 168  | b1257 | REV | 1312742 | 1313248 | pORF_-_1312742 | equal  | npORF_-_1312742 | 1312742 | 1313167 | inside |
| EG11126 | yciF | 166  | b1258 | REV | 1313294 | 1313794 | pORF_-_1313294 | inside | npORF_-_1313294 | 1313294 | 1313788 | inside |
| EG11024 | trpA | 268  | b1260 | REV | 1314440 | 1315246 | pORF_-_1314440 | equal  | npORF_-_1314440 | 1314440 | 1315246 | equal  |
| EG11025 | trpB | 397  | b1261 | REV | 1315246 | 1316439 | pORF_-_1315246 | equal  | npORF_-_1315246 | 1315246 | 1316439 | equal  |
| EG11027 | trpD | 531  | b1263 | REV | 1317813 | 1319408 | pORF_-_1317813 | equal  | npORF_-_1317813 | 1317813 | 1319408 | equal  |
| EG11028 | trpE | 520  | b1264 | REV | 1319408 | 1320970 | pORF_-_1319408 | equal  | npORF_-_1319408 | 1319408 | 1320970 | equal  |
| EG12868 | yciN | 83   | b1273 | REV | 1328441 | 1328692 | pORF_-_1328441 | equal  | npORF_-_1328441 | 1328441 | 1328692 | equal  |
| EG11331 | ribA | 196  | b1277 | REV | 1336594 | 1337184 | pORF_-_1336594 | inside | npORF_-_1336594 | 1336594 | 1337169 | inside |
| EG11528 | fabI | 262  | b1288 | REV | 1348275 | 1349063 | pORF_-_1348275 | equal  | npORF_-_1348275 | 1348275 | 1349063 | equal  |
| EG12672 | tpx  | 168  | b1324 | REV | 1386329 | 1386835 | pORF_-_1386329 | equal  | npORF_-_1386329 | 1386329 | 1386835 | equal  |
| EG11246 | uspE | 316  | b1333 | REV | 1395696 | 1396646 | pORF_-_1395696 | inside | npORF_-_1395696 | 1395696 | 1396646 | equal  |
| EG10325 | fnr  | 250  | b1334 | REV | 1396798 | 1397550 | pORF_-_1396798 | inside | npORF_-_1396798 | 1396798 | 1397121 | inside |
| EG10668 | ogt  | 171  | b1335 | REV | 1397745 | 1398260 |                |        |                 |         |         |        |
| EG11899 | recT | 269  | b1349 | REV | 1412008 | 1412817 |                |        |                 |         |         |        |
| EG10827 | recE | 866  | b1350 | REV | 1412810 | 1415410 | pORF_-_1412810 | equal  | npORF_-_1412810 | 1412810 | 1415059 | inside |
| EG10813 | racC | 91   | b1351 | REV | 1415512 | 1415787 |                |        |                 |         |         |        |
| EG12674 | uspF | 144  | b1376 | REV | 1433209 | 1433643 | pORF_-_1433209 | inside | npORF_-_1433209 | 1433209 | 1433643 | equal  |
| EG13375 | ompN | 377  | b1377 | REV | 1433784 | 1434917 | pORF_-_1433784 | equal  | npORF_-_1433784 | 1433784 | 1434917 | equal  |
| EG13422 | feaR | 301  | b1384 | REV | 1444402 | 1445307 |                |        |                 |         |         |        |
| EG13140 | tynA | 757  | b1386 | REV | 1447100 | 1449373 |                |        |                 |         |         |        |
| EG12695 | azoR | 201  | b1412 | REV | 1480279 | 1480884 | pORF_-_1480279 | equal  | npORF_-_1480279 | 1480279 | 1480824 | inside |
| EG10647 | narY | 514  | b1467 | REV | 1535333 | 1536877 |                |        |                 |         |         |        |
| EG11508 | sra  | 45   | b1480 | REV | 1553850 | 1553987 | pORF_-_1553850 | equal  | npORF_-_1553850 | 1553850 | 1553987 | equal  |

|         |      |     |       |     |         |         |                |        |                 |         |         |        |
|---------|------|-----|-------|-----|---------|---------|----------------|--------|-----------------|---------|---------|--------|
| EG11490 | gadB | 466 | b1493 | REV | 1568669 | 1570069 | pORF_-_1568669 | inside | npORF_-_1568669 | 1568669 | 1570069 | equal  |
| EG10442 | hipB | 88  | b1508 | REV | 1590200 | 1590466 |                |        |                 |         |         |        |
| EG11065 | uxaB | 483 | b1521 | REV | 1607253 | 1608704 | pORF_-_1607253 | equal  | npORF_-_1607253 | 1607253 | 1608704 | equal  |
| EG10212 | dcp  | 681 | b1538 | REV | 1623359 | 1625404 | pORF_-_1623359 | inside | npORF_-_1623359 | 1623359 | 1625299 | inside |
| EG10745 | pntB | 462 | b1602 | REV | 1672996 | 1674384 | pORF_-_1672996 | equal  | npORF_-_1672996 | 1672996 | 1673598 | inside |
| EG10744 | pntA | 510 | b1603 | REV | 1674395 | 1675927 | pORF_-_1674395 | inside | npORF_-_1674395 | 1674395 | 1675927 | equal  |
| EG10358 | fumC | 467 | b1611 | REV | 1683209 | 1684612 | pORF_-_1683209 | equal  | npORF_-_1683209 | 1683209 | 1684612 | equal  |
| EG10356 | fumA | 548 | b1612 | REV | 1684755 | 1686401 | pORF_-_1684755 | equal  | npORF_-_1684755 | 1684755 | 1686401 | equal  |
| EG12668 | uidC | 421 | b1615 | REV | 1689610 | 1690875 |                |        |                 |         |         |        |
| EG11658 | uidB | 457 | b1616 | REV | 1690914 | 1692287 |                |        |                 |         |         |        |
| EG11055 | uidA | 603 | b1617 | REV | 1692284 | 1694095 |                |        |                 |         |         |        |
| EG10425 | hdhA | 255 | b1619 | REV | 1695297 | 1696064 | pORF_-_1695297 | equal  | npORF_-_1695297 | 1695297 | 1696064 | equal  |
| EG11043 | tyrS | 424 | b1637 | REV | 1713972 | 1715246 | pORF_-_1713972 | inside | npORF_-_1713972 | 1713972 | 1715246 | equal  |
| EG11487 | pdxH | 218 | b1638 | REV | 1715375 | 1716031 | pORF_-_1715375 | equal  | npORF_-_1715375 | 1715375 | 1716031 | equal  |
| EG13962 | sufS | 406 | b1680 | REV | 1757327 | 1758547 | pORF_-_1757327 | equal  | npORF_-_1757327 | 1757327 | 1758388 | inside |
| EG10759 | pps  | 792 | b1702 | REV | 1782758 | 1785136 | pORF_-_1782758 | equal  | npORF_-_1782758 | 1782758 | 1785136 | equal  |
| EG10440 | ihfA | 99  | b1712 | REV | 1793277 | 1793576 | pORF_-_1793277 | equal  | npORF_-_1793277 | 1793277 | 1793576 | equal  |
| EG10881 | rplT | 118 | b1716 | REV | 1797417 | 1797773 | pORF_-_1797417 | equal  | npORF_-_1797417 | 1797417 | 1797773 | equal  |
| EG11231 | rpmI | 65  | b1717 | REV | 1797826 | 1798023 | pORF_-_1797826 | inside | npORF_-_1797826 | 1797826 | 1798023 | equal  |
| EG10506 | infC | 180 | b1718 | REV | 1798120 | 1798662 | pORF_-_1798120 | inside | npORF_-_1798120 | 1798120 | 1798677 | inside |
| EG10144 | chbF | 450 | b1734 | REV | 1815172 | 1816524 |                |        |                 |         |         |        |
| EG13994 | ves  | 191 | b1742 | REV | 1822386 | 1822961 |                |        |                 |         |         |        |
| EG13490 | spy  | 161 | b1743 | REV | 1823164 | 1823649 | pORF_-_1823164 | equal  | npORF_-_1823164 | 1823164 | 1823499 | inside |
| EG11014 | topB | 653 | b1763 | REV | 1843023 | 1844984 | pORF_-_1843023 | inside | npORF_-_1843023 | 1843023 | 1843979 | inside |
| EG13492 | mipA | 248 | b1782 | REV | 1863750 | 1864496 | pORF_-_1863750 | equal  | npORF_-_1863750 | 1863750 | 1864466 | inside |
| EG10858 | rnd  | 375 | b1804 | REV | 1884888 | 1886015 |                |        |                 |         |         |        |
| EG11530 | fadD | 561 | b1805 | REV | 1886085 | 1887770 | pORF_-_1886085 | inside | npORF_-_1886085 | 1886085 | 1887770 | equal  |
| EG12204 | cspC | 69  | b1823 | REV | 1905250 | 1905459 | pORF_-_1905250 | equal  | npORF_-_1905250 | 1905250 | 1905459 | equal  |
| EG10760 | prc  | 682 | b1830 | REV | 1910792 | 1912840 | pORF_-_1910792 | inside | npORF_-_1910792 | 1910792 | 1912834 | inside |
| EG11004 | ptrB | 686 | b1845 | REV | 1924803 | 1926863 |                |        |                 |         |         |        |
| EG11807 | yebF | 118 | b1847 | REV | 1928058 | 1928414 | pORF_-_1928058 | inside | npORF_-_1928058 | 1928058 | 1928381 | inside |
| EG10256 | eda  | 213 | b1850 | REV | 1930139 | 1930780 | pORF_-_1930139 | equal  | npORF_-_1930139 | 1930139 | 1930780 | equal  |
| EG12678 | znuA | 310 | b1857 | REV | 1939675 | 1940607 | pORF_-_1939675 | inside | npORF_-_1939675 | 1939675 | 1940607 | equal  |
| EG10925 | ruvC | 173 | b1863 | REV | 1944879 | 1945400 | pORF_-_1944879 | inside | npORF_-_1944879 | 1944879 | 1945190 | inside |
| EG10097 | aspS | 590 | b1866 | REV | 1946774 | 1948546 | pORF_-_1946774 | equal  | npORF_-_1946774 | 1946774 | 1948546 | equal  |
| EG13276 | torZ | 809 | b1872 | REV | 1952602 | 1955031 | pORF_-_1952602 | inside | npORF_-_1952602 | 1952602 | 1953582 | inside |
| EG10146 | cheA | 654 | b1888 | REV | 1971384 | 1973348 | pORF_-_1971384 | inside | npORF_-_1971384 | 1971384 | 1973231 | inside |
| EG11751 | otsA | 474 | b1896 | REV | 1978212 | 1979636 | pORF_-_1978212 | inside | npORF_-_1978212 | 1978212 | 1979636 | equal  |
| EG11752 | otsB | 266 | b1897 | REV | 1979611 | 1980411 | pORF_-_1979611 | inside | npORF_-_1979611 | 1979611 | 1980240 | inside |
| EG10057 | araF | 329 | b1901 | REV | 1983163 | 1984152 | pORF_-_1983163 | inside | npORF_-_1983163 | 1983163 | 1983966 | inside |
| EG11063 | uvrC | 610 | b1913 | REV | 1990898 | 1992730 | pORF_-_1990898 | equal  | npORF_-_1990898 | 1990898 | 1992664 | inside |
| EG14038 | dcyD | 328 | b1919 | REV | 1996518 | 1997504 | pORF_-_1996518 | inside | npORF_-_1996518 | 1996518 | 1997504 | equal  |
| EG12680 | fliY | 266 | b1920 | REV | 1997609 | 1998409 | pORF_-_1997609 | inside | npORF_-_1997609 | 1997609 | 1998343 | inside |
| EG10321 | fliC | 498 | b1923 | REV | 2000134 | 2001630 | pORF_-_2000134 | equal  | npORF_-_2000134 | 2000134 | 2001630 | equal  |
| EG11068 | vsr  | 156 | b1960 | REV | 2028472 | 2028942 |                |        |                 |         |         |        |
| EG12682 | erfK | 310 | b1990 | REV | 2060415 | 2061347 | pORF_-_2060415 | inside | npORF_-_2060415 | 2060415 | 2061347 | equal  |

|         |      |     |       |     |         |         |                |        |                 |         |         |        |
|---------|------|-----|-------|-----|---------|---------|----------------|--------|-----------------|---------|---------|--------|
| EG13391 | yeeX | 109 | b2007 | REV | 2077056 | 2077385 | pORF_-_2077056 | inside | npORF_-_2077056 | 2077056 | 2077448 | inside |
| EG11892 | sbmC | 157 | b2009 | REV | 2078813 | 2079286 | pORF_-_2078813 | equal  | npORF_-_2078813 | 2078813 | 2079286 | equal  |
| EG11981 | glf  | 367 | b2036 | REV | 2105250 | 2106353 | pORF_-_2105250 | equal  | npORF_-_2105250 | 2105250 | 2106269 | inside |
| EG11418 | dcd  | 193 | b2065 | REV | 2139658 | 2140239 | pORF_-_2139658 | equal  | npORF_-_2139658 | 2139658 | 2140239 | equal  |
| EG11222 | alkA | 282 | b2068 | REV | 2144716 | 2145564 |                |        |                 |         |         |        |
| EG12415 | gatB | 94  | b2093 | REV | 2172304 | 2172588 | pORF_-_2172304 | equal  | npORF_-_2172304 | 2172304 | 2172588 | equal  |
| EG12419 | gatY | 284 | b2096 | REV | 2174372 | 2175226 | pORF_-_2174372 | inside | npORF_-_2174372 | 2174372 | 2175226 | equal  |
| EG14062 | fbaB | 350 | b2097 | REV | 2175534 | 2176586 | pORF_-_2175534 | inside | npORF_-_2175534 | 2175534 | 2176586 | equal  |
| EG12015 | pbpG | 310 | b2134 | REV | 2221960 | 2222892 | pORF_-_2221960 | inside | npORF_-_2221960 | 2221960 | 2222025 | inside |
| EG10593 | mgIB | 332 | b2150 | REV | 2237372 | 2238370 | pORF_-_2237372 | equal  | npORF_-_2237372 | 2237372 | 2238328 | inside |
| EG10365 | galS | 346 | b2151 | REV | 2238650 | 2239690 |                |        |                 |         |         |        |
| EG11375 | folE | 222 | b2153 | REV | 2241006 | 2241674 | pORF_-_2241006 | equal  | npORF_-_2241006 | 2241006 | 2241674 | equal  |
| EG10155 | cirA | 663 | b2155 | REV | 2242800 | 2244791 | pORF_-_2242800 | equal  | npORF_-_2242800 | 2242800 | 2244725 | inside |
| EG11337 | lysP | 489 | b2156 | REV | 2245085 | 2246554 | pORF_-_2245085 | equal  | npORF_-_2245085 | 2245085 | 2245591 | inside |
| EG12044 | rsuA | 231 | b2183 | REV | 2277810 | 2278505 | pORF_-_2277810 | equal  | npORF_-_2277810 | 2277810 | 2278505 | equal  |
| EG12048 | yeyK | 335 | b2186 | REV | 2280962 | 2281969 | pORF_-_2280962 | equal  | npORF_-_2280962 | 2280962 | 2281969 | equal  |
| EG12055 | ccmE | 159 | b2197 | REV | 2292923 | 2293402 |                |        |                 |         |         |        |
| EG12061 | napB | 149 | b2203 | REV | 2296291 | 2296740 |                |        |                 |         |         |        |
| EG12067 | napA | 828 | b2206 | REV | 2298289 | 2300775 | pORF_-_2298289 | equal  | npORF_-_2298289 | 2298289 | 2300586 | inside |
| EG10037 | alkB | 216 | b2212 | REV | 2306713 | 2307363 |                |        |                 |         |         |        |
| EG10029 | ada  | 354 | b2213 | REV | 2307363 | 2308427 |                |        |                 |         |         |        |
| EG10670 | ompC | 367 | b2215 | REV | 2309668 | 2310771 | pORF_-_2309668 | equal  | npORF_-_2309668 | 2309668 | 2310771 | equal  |
| EG10423 | gyrA | 875 | b2231 | REV | 2334815 | 2337442 | pORF_-_2334815 | equal  | npORF_-_2334815 | 2334815 | 2337442 | equal  |
| EG10399 | glpQ | 358 | b2239 | REV | 2347957 | 2349033 | pORF_-_2347957 | inside | npORF_-_2347957 | 2347957 | 2348964 | inside |
| EG12089 | nuoI | 180 | b2281 | REV | 2393930 | 2394472 | pORF_-_2393930 | equal  | npORF_-_2393930 | 2393930 | 2394472 | equal  |
| EG12087 | nuoG | 908 | b2283 | REV | 2395461 | 2398187 | pORF_-_2395461 | inside | npORF_-_2395461 | 2395461 | 2398040 | inside |
| EG11774 | nuoF | 445 | b2284 | REV | 2398240 | 2399577 | pORF_-_2398240 | equal  | npORF_-_2398240 | 2398240 | 2399577 | equal  |
| EG12086 | nuoE | 166 | b2285 | REV | 2399574 | 2400074 | pORF_-_2399574 | equal  | npORF_-_2399574 | 2399574 | 2400074 | equal  |
| EG12084 | nuoC | 596 | b2286 | REV | 2400077 | 2401867 | pORF_-_2400077 | inside | npORF_-_2400077 | 2400077 | 2401867 | equal  |
| EG12083 | nuoB | 220 | b2287 | REV | 2401973 | 2402635 | pORF_-_2401973 | equal  | npORF_-_2401973 | 2401973 | 2402635 | equal  |
| EG12124 | hisJ | 260 | b2309 | REV | 2424028 | 2424810 | pORF_-_2424028 | equal  | npORF_-_2424028 | 2424028 | 2424798 | inside |
| EG10072 | argT | 260 | b2310 | REV | 2425031 | 2425813 | pORF_-_2425031 | equal  | npORF_-_2425031 | 2425031 | 2425786 | inside |
| EG10794 | purF | 505 | b2312 | REV | 2426743 | 2428260 | pORF_-_2426743 | equal  | npORF_-_2426743 | 2426743 | 2428260 | equal  |
| EG10327 | folC | 422 | b2315 | REV | 2429696 | 2430964 | pORF_-_2429696 | equal  | npORF_-_2429696 | 2429696 | 2430964 | equal  |
| EG10454 | truA | 270 | b2318 | REV | 2432846 | 2433658 | pORF_-_2432846 | equal  | npORF_-_2432846 | 2432846 | 2433556 | inside |
| EG11059 | usg  | 337 | b2319 | REV | 2433658 | 2434671 | pORF_-_2433658 | equal  | npORF_-_2433658 | 2433658 | 2434671 | equal  |
| EG10274 | fabB | 406 | b2323 | REV | 2438407 | 2439627 | pORF_-_2438407 | equal  | npORF_-_2438407 | 2438407 | 2439627 | equal  |
| EG10580 | mepA | 274 | b2328 | REV | 2443582 | 2444406 | pORF_-_2443582 | equal  | npORF_-_2443582 | 2443582 | 2444001 | inside |
| EG10075 | aroC | 361 | b2329 | REV | 2444410 | 2445495 | pORF_-_2444410 | inside | npORF_-_2444410 | 2444410 | 2445495 | equal  |
| EG14146 | yfdX | 211 | b2375 | REV | 2491789 | 2492424 | pORF_-_2491789 | equal  | npORF_-_2491789 | 2491789 | 2492400 | inside |
| EG10534 | ligA | 671 | b2411 | REV | 2526183 | 2528198 | pORF_-_2526183 | equal  | npORF_-_2526183 | 2526183 | 2528198 | equal  |
| EG10193 | cysM | 303 | b2421 | REV | 2536694 | 2537605 | pORF_-_2536694 | inside | npORF_-_2536694 | 2536694 | 2537605 | equal  |
| EG10195 | cysP | 338 | b2425 | REV | 2540534 | 2541550 | pORF_-_2540534 | equal  | npORF_-_2540534 | 2540534 | 2541550 | equal  |
| EG50007 | eutC | 295 | b2440 | REV | 2554432 | 2555319 | pORF_-_2554432 | equal  | npORF_-_2554432 | 2554432 | 2555319 | equal  |
| EG50006 | eutB | 453 | b2441 | REV | 2555340 | 2556701 | pORF_-_2555340 | inside | npORF_-_2555340 | 2555340 | 2556644 | inside |
| EG10791 | purC | 237 | b2476 | REV | 2594927 | 2595640 | pORF_-_2594927 | inside | npORF_-_2594927 | 2594927 | 2595640 | equal  |

|         |      |      |       |     |         |         |                |        |                 |         |         |        |
|---------|------|------|-------|-----|---------|---------|----------------|--------|-----------------|---------|---------|--------|
| EG10205 | dapA | 292  | b2478 | REV | 2596904 | 2597782 | pORF_-_2596904 | inside | npORF_-_2596904 | 2596904 | 2597782 | equal  |
| EG14201 | hda  | 233  | b2496 | REV | 2616097 | 2616798 | pORF_-_2616097 | inside | npORF_-_2616097 | 2616097 | 2616690 | inside |
| EG11332 | upp  | 208  | b2498 | REV | 2618268 | 2618894 | pORF_-_2618268 | inside | npORF_-_2618268 | 2618268 | 2618894 | equal  |
| EG10420 | guaA | 525  | b2507 | REV | 2628980 | 2630557 | pORF_-_2628980 | equal  | npORF_-_2628980 | 2628980 | 2630557 | equal  |
| EG10421 | guaB | 488  | b2508 | REV | 2630626 | 2632092 | pORF_-_2630626 | inside | npORF_-_2630626 | 2630626 | 2632092 | equal  |
| EG10453 | hisS | 424  | b2514 | REV | 2637323 | 2638597 | pORF_-_2637323 | equal  | npORF_-_2637323 | 2637323 | 2638597 | equal  |
| EG10650 | ndk  | 143  | b2518 | REV | 2642455 | 2642886 | pORF_-_2642455 | equal  | npORF_-_2642455 | 2642455 | 2642886 | equal  |
| EG11328 | fdx  | 111  | b2525 | REV | 2654770 | 2655105 | pORF_-_2654770 | equal  | npORF_-_2654770 | 2654770 | 2655105 | equal  |
| EG12677 | iscS | 404  | b2530 | REV | 2658339 | 2659553 | pORF_-_2658339 | inside | npORF_-_2658339 | 2658339 | 2659553 | equal  |
| EG13467 | yphF | 327  | b2548 | REV | 2676406 | 2677389 |                |        |                 |         |         |        |
| EG10408 | glyA | 417  | b2551 | REV | 2682276 | 2683529 | pORF_-_2682276 | inside | npORF_-_2682276 | 2682276 | 2683529 | equal  |
| EG10384 | glnB | 112  | b2553 | REV | 2685092 | 2685430 | pORF_-_2685092 | equal  | npORF_-_2685092 | 2685092 | 2685430 | equal  |
| EG10797 | purL | 1295 | b2557 | REV | 2689678 | 2693565 | pORF_-_2689678 | equal  | npORF_-_2689678 | 2689678 | 2693565 | equal  |
| EG10247 | acpS | 126  | b2563 | REV | 2698640 | 2699020 | pORF_-_2698640 | equal  | npORF_-_2698640 | 2698640 | 2699020 | equal  |
| EG10693 | pdxJ | 243  | b2564 | REV | 2699020 | 2699751 | pORF_-_2699020 | inside | npORF_-_2699020 | 2699020 | 2699751 | equal  |
| EG10270 | era  | 301  | b2566 | REV | 2700503 | 2701408 | pORF_-_2700503 | equal  | npORF_-_2700503 | 2700503 | 2701408 | equal  |
| EG10857 | rnc  | 226  | b2567 | REV | 2701405 | 2702085 | pORF_-_2701405 | equal  | npORF_-_2701405 | 2701405 | 2702085 | equal  |
| EG11784 | yfiD | 127  | b2579 | REV | 2714088 | 2714471 | pORF_-_2714088 | inside | npORF_-_2714088 | 2714088 | 2714471 | equal  |
| EG10157 | clpB | 857  | b2592 | REV | 2729622 | 2732195 | pORF_-_2729622 | inside | npORF_-_2729622 | 2729622 | 2732018 | inside |
| EG12098 | rluD | 326  | b2594 | REV | 2733053 | 2734033 | pORF_-_2733053 | equal  | npORF_-_2733053 | 2733053 | 2734033 | equal  |
| EG10078 | aroF | 356  | b2601 | REV | 2738102 | 2739172 | pORF_-_2738102 | inside | npORF_-_2738102 | 2738102 | 2739172 | equal  |
| EG10880 | rplS | 115  | b2606 | REV | 2742205 | 2742552 | pORF_-_2742205 | equal  | npORF_-_2742205 | 2742205 | 2742552 | equal  |
| EG11023 | trmD | 255  | b2607 | REV | 2742594 | 2743361 | pORF_-_2742594 | equal  | npORF_-_2742594 | 2742594 | 2743361 | equal  |
| EG10915 | rpsP | 82   | b2609 | REV | 2743959 | 2744207 | pORF_-_2743959 | inside | npORF_-_2743959 | 2743959 | 2744207 | equal  |
| EG12675 | ygaU | 149  | b2665 | REV | 2794359 | 2794808 | pORF_-_2794359 | inside | npORF_-_2794359 | 2794359 | 2794808 | equal  |
| EG11554 | stpA | 134  | b2669 | REV | 2796113 | 2796517 | pORF_-_2796113 | equal  | npORF_-_2796113 | 2796113 | 2796517 | equal  |
| EG12712 | luxS | 171  | b2687 | REV | 2812240 | 2812755 | pORF_-_2812240 | equal  | npORF_-_2812240 | 2812240 | 2812755 | equal  |
| EG10418 | gshA | 518  | b2688 | REV | 2812905 | 2814461 | pORF_-_2812905 | equal  | npORF_-_2812905 | 2812905 | 2814371 | inside |
| EG10034 | alaS | 876  | b2697 | REV | 2817403 | 2820033 | pORF_-_2817403 | equal  | npORF_-_2817403 | 2817403 | 2820033 | equal  |
| EG10823 | recA | 353  | b2699 | REV | 2820730 | 2821791 | pORF_-_2820730 | inside | npORF_-_2820730 | 2820730 | 2821791 | equal  |
| EG13396 | hycI | 156  | b2717 | REV | 2840595 | 2841065 | pORF_-_2840595 | equal  | npORF_-_2840595 | 2840595 | 2841029 | inside |
| EG10478 | hycE | 569  | b2721 | REV | 2842784 | 2844493 |                |        |                 |         |         |        |
| EG10689 | pcm  | 208  | b2743 | REV | 2866915 | 2867541 | pORF_-_2866915 | equal  | npORF_-_2866915 | 2866915 | 2867541 | equal  |
| EG13109 | truD | 349  | b2745 | REV | 2868277 | 2869326 | pORF_-_2868277 | equal  | npORF_-_2868277 | 2868277 | 2869326 | equal  |
| EG13110 | ispD | 236  | b2747 | REV | 2869802 | 2870512 | pORF_-_2869802 | equal  | npORF_-_2869802 | 2869802 | 2870512 | equal  |
| EG10185 | cysC | 201  | b2750 | REV | 2871409 | 2872014 | pORF_-_2871409 | equal  | npORF_-_2871409 | 2871409 | 2872014 | equal  |
| EG10194 | cysN | 475  | b2751 | REV | 2872014 | 2873441 | pORF_-_2872014 | equal  | npORF_-_2872014 | 2872014 | 2873441 | equal  |
| EG10186 | cysD | 302  | b2752 | REV | 2873443 | 2874351 | pORF_-_2873443 | equal  | npORF_-_2873443 | 2873443 | 2874351 | equal  |
| EG10189 | cysH | 244  | b2762 | REV | 2885600 | 2886334 | pORF_-_2885600 | inside | npORF_-_2885600 | 2885600 | 2886334 | equal  |
| EG10190 | cysI | 570  | b2763 | REV | 2886409 | 2888121 | pORF_-_2886409 | equal  | npORF_-_2886409 | 2886409 | 2888121 | equal  |
| EG10191 | cysJ | 599  | b2764 | REV | 2888121 | 2889920 | pORF_-_2888121 | equal  | npORF_-_2888121 | 2888121 | 2889920 | equal  |
| EG10258 | eno  | 432  | b2779 | REV | 2904665 | 2905963 | pORF_-_2904665 | equal  | npORF_-_2904665 | 2904665 | 2905963 | equal  |
| EG10810 | pyrG | 545  | b2780 | REV | 2906051 | 2907688 | pORF_-_2906051 | equal  | npORF_-_2906051 | 2906051 | 2907688 | equal  |
| EG13167 | gudD | 446  | b2787 | REV | 2916067 | 2917407 | pORF_-_2916067 | inside | npORF_-_2916067 | 2916067 | 2917287 | inside |
| EG12959 | syd  | 181  | b2793 | REV | 2922757 | 2923302 | pORF_-_2922757 | equal  | npORF_-_2922757 | 2922757 | 2923005 | inside |
| EG10826 | recD | 608  | b2819 | REV | 2948657 | 2950483 | pORF_-_2948657 | equal  | npORF_-_2948657 | 2948657 | 2949559 | inside |

|         |      |      |       |     |         |         |                |        |                 |         |         |        |
|---------|------|------|-------|-----|---------|---------|----------------|--------|-----------------|---------|---------|--------|
| EG10824 | recB | 1180 | b2820 | REV | 2950483 | 2954025 | pORF_-_2950483 | inside | npORF_-_2950483 | 2950483 | 2953182 | inside |
| EG10825 | recC | 1122 | b2822 | REV | 2957082 | 2960450 | pORF_-_2957082 | equal  | npORF_-_2957082 | 2957082 | 2960147 | inside |
| EG11002 | thyA | 264  | b2827 | REV | 2962383 | 2963177 | pORF_-_2962383 | equal  | npORF_-_2962383 | 2962383 | 2963177 | equal  |
| EG13096 | kduI | 278  | b2843 | REV | 2981310 | 2982146 |                |        |                 |         |         |        |
| EG10552 | lysS | 505  | b2890 | REV | 3031679 | 3033196 | pORF_-_3031679 | equal  | npORF_-_3031679 | 3031679 | 3033196 | equal  |
| EG10762 | prfB | 365  | b2891 | REV | 3033206 | 3034304 |                |        |                 |         |         |        |
| EG11070 | dsbC | 236  | b2893 | REV | 3036134 | 3036844 | pORF_-_3036134 | equal  | npORF_-_3036134 | 3036134 | 3036817 | inside |
| EG11071 | xerD | 298  | b2894 | REV | 3036869 | 3037765 | pORF_-_3036869 | equal  | npORF_-_3036869 | 3036869 | 3037441 | inside |
| EG11810 | gcvP | 957  | b2903 | REV | 3044190 | 3047063 | pORF_-_3044190 | equal  | npORF_-_3044190 | 3044190 | 3047063 | equal  |
| EG10371 | gcvH | 129  | b2904 | REV | 3047182 | 3047571 | pORF_-_3047182 | inside | npORF_-_3047182 | 3047182 | 3047571 | equal  |
| EG11442 | gcvT | 364  | b2905 | REV | 3047595 | 3048689 | pORF_-_3047595 | equal  | npORF_-_3047595 | 3047595 | 3048689 | equal  |
| EG10697 | pepP | 441  | b2908 | REV | 3051537 | 3052862 | pORF_-_3051537 | inside | npORF_-_3051537 | 3051537 | 3052862 | equal  |
| EG10944 | serA | 410  | b2913 | REV | 3055200 | 3056432 | pORF_-_3055200 | equal  | npORF_-_3055200 | 3055200 | 3056432 | equal  |
| EG11443 | rpiA | 219  | b2914 | REV | 3056688 | 3057347 | pORF_-_3056688 | inside | npORF_-_3056688 | 3056688 | 3057347 | equal  |
| EG10703 | pgk  | 387  | b2926 | REV | 3069481 | 3070644 | pORF_-_3069481 | inside | npORF_-_3069481 | 3069481 | 3070644 | equal  |
| EG10368 | epd  | 339  | b2927 | REV | 3070694 | 3071713 | pORF_-_3070694 | inside | npORF_-_3070694 | 3070694 | 3071713 | equal  |
| EG11427 | tktA | 663  | b2935 | REV | 3077666 | 3079657 | pORF_-_3077666 | inside | npORF_-_3077666 | 3077666 | 3079657 | equal  |
| EG10046 | ansB | 348  | b2957 | REV | 3097704 | 3098750 | pORF_-_3097704 | equal  | npORF_-_3097704 | 3097704 | 3097883 | inside |
| EG20080 | glcB | 723  | b2976 | REV | 3119656 | 3121827 | pORF_-_3119656 | equal  | npORF_-_3119656 | 3119656 | 3121827 | equal  |
| EG11801 | hybC | 567  | b2994 | REV | 3139308 | 3141011 | pORF_-_3139308 | equal  | npORF_-_3139308 | 3139308 | 3139859 | inside |
| EG13006 | hybO | 372  | b2997 | REV | 3143165 | 3144283 |                |        |                 |         |         |        |
| EG11376 | ftsP | 470  | b3017 | REV | 3159279 | 3160691 | pORF_-_3159279 | equal  | npORF_-_3159279 | 3159279 | 3160334 | inside |
| EG11377 | plsC | 245  | b3018 | REV | 3160766 | 3161503 | pORF_-_3160766 | equal  | npORF_-_3160766 | 3160766 | 3161161 | inside |
| EG13025 | ygiW | 130  | b3024 | REV | 3167306 | 3167698 | pORF_-_3167306 | inside | npORF_-_3167306 | 3167306 | 3167644 | inside |
| EG12187 | cpdA | 275  | b3032 | REV | 3174028 | 3174855 | pORF_-_3174028 | equal  | npORF_-_3174028 | 3174028 | 3174855 | equal  |
| EG12184 | nudF | 209  | b3034 | REV | 3175303 | 3175932 | pORF_-_3175303 | equal  | npORF_-_3175303 | 3175303 | 3175932 | equal  |
| EG10465 | ribB | 217  | b3041 | REV | 3181835 | 3182488 | pORF_-_3181835 | equal  | npORF_-_3181835 | 3181835 | 3182488 | equal  |
| EG11673 | folB | 122  | b3058 | REV | 3202243 | 3202611 |                |        |                 |         |         |        |
| EG10990 | tdcB | 329  | b3117 | REV | 3263061 | 3264050 | pORF_-_3263061 | equal  | npORF_-_3263061 | 3263061 | 3263276 | inside |
| EG10016 | garL | 256  | b3126 | REV | 3270809 | 3271579 |                |        |                 |         |         |        |
| EG10215 | deaD | 629  | b3162 | REV | 3303993 | 3305882 | pORF_-_3303993 | inside | npORF_-_3303993 | 3303993 | 3305882 | equal  |
| EG10743 | pnp  | 711  | b3164 | REV | 3307055 | 3309190 | pORF_-_3307055 | inside | npORF_-_3307055 | 3307055 | 3309190 | equal  |
| EG10914 | rpsO | 89   | b3165 | REV | 3309437 | 3309706 | pORF_-_3309437 | equal  | npORF_-_3309437 | 3309437 | 3309871 | inside |
| EG11177 | truB | 314  | b3166 | REV | 3309855 | 3310799 | pORF_-_3309855 | equal  | npORF_-_3309855 | 3309855 | 3310706 | inside |
| EG11178 | rbfA | 133  | b3167 | REV | 3310799 | 3311200 | pORF_-_3310799 | inside | npORF_-_3310799 | 3310799 | 3311200 | equal  |
| EG10505 | infB | 890  | b3168 | REV | 3311364 | 3314036 | pORF_-_3311364 | equal  | npORF_-_3311364 | 3311364 | 3314036 | equal  |
| EG10665 | nusA | 495  | b3169 | REV | 3314061 | 3315548 | pORF_-_3314061 | equal  | npORF_-_3314061 | 3314061 | 3315548 | equal  |
| EG11553 | glmM | 445  | b3176 | REV | 3320755 | 3322092 | pORF_-_3320755 | equal  | npORF_-_3320755 | 3320755 | 3322092 | equal  |
| EG50011 | folP | 282  | b3177 | REV | 3322085 | 3322933 | pORF_-_3322085 | inside | npORF_-_3322085 | 3322085 | 3322933 | equal  |
| EG10415 | greA | 158  | b3181 | REV | 3326261 | 3326737 | pORF_-_3326261 | equal  | npORF_-_3326261 | 3326261 | 3326737 | equal  |
| EG50002 | rpmA | 85   | b3185 | REV | 3330884 | 3331141 | pORF_-_3330884 | equal  | npORF_-_3330884 | 3330884 | 3331141 | equal  |
| EG50001 | rplU | 103  | b3186 | REV | 3331162 | 3331473 | pORF_-_3331162 | inside | npORF_-_3331162 | 3331162 | 3331473 | equal  |
| EG11358 | murA | 419  | b3189 | REV | 3333257 | 3334516 | pORF_-_3333257 | equal  | npORF_-_3333257 | 3333257 | 3334516 | equal  |
| EG11383 | elbB | 217  | b3209 | REV | 3347828 | 3348481 | pORF_-_3347828 | inside | npORF_-_3347828 | 3347828 | 3348406 | inside |
| EG10637 | nanA | 297  | b3225 | REV | 3370705 | 3371598 | pORF_-_3370705 | equal  | npORF_-_3370705 | 3370705 | 3371598 | equal  |
| EG10978 | sspB | 165  | b3228 | REV | 3374301 | 3374798 | pORF_-_3374301 | equal  | npORF_-_3374301 | 3374301 | 3374798 | equal  |



|         |      |     |       |     |         |         |                |        |                 |         |         |        |
|---------|------|-----|-------|-----|---------|---------|----------------|--------|-----------------|---------|---------|--------|
| EG10977 | sspA | 212 | b3229 | REV | 3374804 | 3375442 | pORF_-_3374804 | equal  | npORF_-_3374804 | 3374804 | 3375442 | equal  |
| EG10908 | rpsI | 130 | b3230 | REV | 3375837 | 3376229 | pORF_-_3375837 | equal  | npORF_-_3375837 | 3375837 | 3376229 | equal  |
| EG10874 | rplM | 142 | b3231 | REV | 3376245 | 3376673 | pORF_-_3376245 | inside | npORF_-_3376245 | 3376245 | 3376673 | equal  |
| EG10576 | mdh  | 312 | b3236 | REV | 3381352 | 3382290 | pORF_-_3381352 | inside | npORF_-_3381352 | 3381352 | 3382290 | equal  |
| EG11299 | rng  | 489 | b3247 | REV | 3394348 | 3395817 | pORF_-_3394348 | inside | npORF_-_3394348 | 3394348 | 3395817 | equal  |
| EG10608 | mreB | 347 | b3251 | REV | 3398066 | 3399109 | pORF_-_3398066 | inside | npORF_-_3398066 | 3398066 | 3399106 | inside |
| EG10077 | aroE | 272 | b3281 | REV | 3428042 | 3428860 | pORF_-_3428042 | inside | npORF_-_3428042 | 3428042 | 3428860 | equal  |
| EG10878 | rplQ | 127 | b3294 | REV | 3437638 | 3438021 | pORF_-_3437638 | equal  | npORF_-_3437638 | 3437638 | 3438021 | equal  |
| EG10893 | rpoA | 329 | b3295 | REV | 3438062 | 3439051 | pORF_-_3438062 | equal  | npORF_-_3438062 | 3438062 | 3439051 | equal  |
| EG10903 | rpsD | 206 | b3296 | REV | 3439077 | 3439697 | pORF_-_3439077 | equal  | npORF_-_3439077 | 3439077 | 3439697 | equal  |
| EG10910 | rpsK | 129 | b3297 | REV | 3439731 | 3440120 | pORF_-_3439731 | equal  | npORF_-_3439731 | 3439731 | 3440120 | equal  |
| EG10912 | rpsM | 118 | b3298 | REV | 3440137 | 3440493 | pORF_-_3440137 | equal  | npORF_-_3440137 | 3440137 | 3440493 | equal  |
| EG11232 | rpmJ | 38  | b3299 | REV | 3440640 | 3440756 | pORF_-_3440640 | equal  | npORF_-_3440640 | 3440640 | 3440684 | inside |
| EG10876 | rplO | 144 | b3301 | REV | 3442127 | 3442561 | pORF_-_3442127 | equal  | npORF_-_3442127 | 3442127 | 3442561 | equal  |
| EG10888 | rpmD | 59  | b3302 | REV | 3442565 | 3442744 | pORF_-_3442565 | equal  | npORF_-_3442565 | 3442565 | 3442744 | equal  |
| EG10904 | rpsE | 167 | b3303 | REV | 3442748 | 3443251 | pORF_-_3442748 | equal  | npORF_-_3442748 | 3442748 | 3443251 | equal  |
| EG10879 | rplR | 117 | b3304 | REV | 3443266 | 3443619 | pORF_-_3443266 | equal  | npORF_-_3443266 | 3443266 | 3443619 | equal  |
| EG10869 | rplF | 177 | b3305 | REV | 3443629 | 3444162 | pORF_-_3443629 | equal  | npORF_-_3443629 | 3443629 | 3444162 | equal  |
| EG10907 | rpsH | 130 | b3306 | REV | 3444175 | 3444567 | pORF_-_3444175 | equal  | npORF_-_3444175 | 3444175 | 3444567 | equal  |
| EG10913 | rpsN | 101 | b3307 | REV | 3444601 | 3444906 | pORF_-_3444601 | equal  | npORF_-_3444601 | 3444601 | 3444906 | equal  |
| EG10868 | rplE | 179 | b3308 | REV | 3444921 | 3445460 | pORF_-_3444921 | equal  | npORF_-_3444921 | 3444921 | 3445460 | equal  |
| EG10884 | rplX | 104 | b3309 | REV | 3445475 | 3445789 | pORF_-_3445475 | equal  | npORF_-_3445475 | 3445475 | 3445789 | equal  |
| EG10875 | rplN | 123 | b3310 | REV | 3445800 | 3446171 | pORF_-_3445800 | equal  | npORF_-_3445800 | 3445800 | 3446171 | equal  |
| EG10916 | rpsQ | 84  | b3311 | REV | 3446336 | 3446590 | pORF_-_3446336 | equal  | npORF_-_3446336 | 3446336 | 3446590 | equal  |
| EG10887 | rpmC | 63  | b3312 | REV | 3446590 | 3446781 | pORF_-_3446590 | equal  | npORF_-_3446590 | 3446590 | 3446781 | equal  |
| EG10877 | rplP | 136 | b3313 | REV | 3446781 | 3447191 | pORF_-_3446781 | equal  | npORF_-_3446781 | 3446781 | 3447158 | inside |
| EG10902 | rpsC | 233 | b3314 | REV | 3447204 | 3447905 | pORF_-_3447204 | equal  | npORF_-_3447204 | 3447204 | 3447905 | equal  |
| EG10882 | rplV | 110 | b3315 | REV | 3447923 | 3448255 | pORF_-_3447923 | equal  | npORF_-_3447923 | 3447923 | 3448255 | equal  |
| EG10918 | rpsS | 92  | b3316 | REV | 3448270 | 3448548 | pORF_-_3448270 | equal  | npORF_-_3448270 | 3448270 | 3448548 | equal  |
| EG10865 | rplB | 273 | b3317 | REV | 3448565 | 3449386 | pORF_-_3448565 | equal  | npORF_-_3448565 | 3448565 | 3449722 | inside |
| EG10883 | rplW | 100 | b3318 | REV | 3449404 | 3449706 | pORF_-_3449404 | equal  | npORF_-_3449404 | 3449404 | 3449706 | equal  |
| EG10867 | rplD | 201 | b3319 | REV | 3449703 | 3450308 | pORF_-_3449703 | equal  | npORF_-_3449703 | 3449703 | 3450308 | equal  |
| EG10866 | rplC | 209 | b3320 | REV | 3450319 | 3450948 | pORF_-_3450319 | equal  | npORF_-_3450319 | 3450319 | 3450948 | equal  |
| EG10909 | rpsJ | 103 | b3321 | REV | 3450981 | 3451292 | pORF_-_3450981 | equal  | npORF_-_3450981 | 3450981 | 3451292 | equal  |
| EG10113 | bfr  | 158 | b3336 | REV | 3464271 | 3464747 | pORF_-_3464271 | equal  | npORF_-_3464271 | 3464271 | 3464747 | equal  |
| EG11036 | tufA | 394 | b3339 | REV | 3468167 | 3469351 | pORF_-_3468167 | inside | npORF_-_3468167 | 3468167 | 3469351 | equal  |
| EG10360 | fusA | 704 | b3340 | REV | 3469422 | 3471536 | pORF_-_3469422 | equal  | npORF_-_3469422 | 3469422 | 3471536 | equal  |
| EG10906 | rpsG | 179 | b3341 | REV | 3471564 | 3472103 | pORF_-_3471564 | equal  | npORF_-_3471564 | 3471564 | 3472103 | equal  |
| EG10911 | rpsL | 124 | b3342 | REV | 3472200 | 3472574 | pORF_-_3472200 | inside | npORF_-_3472200 | 3472200 | 3472574 | equal  |
| EG12900 | fkpA | 270 | b3347 | REV | 3474629 | 3475441 | pORF_-_3474629 | equal  | npORF_-_3474629 | 3474629 | 3475402 | inside |
| EG11663 | slyD | 196 | b3349 | REV | 3475929 | 3476519 | pORF_-_3475929 | equal  | npORF_-_3475929 | 3475929 | 3476519 | equal  |
| EG10066 | argD | 406 | b3359 | REV | 3486982 | 3488202 | pORF_-_3486982 | equal  | npORF_-_3486982 | 3486982 | 3488202 | equal  |
| EG10757 | ppiA | 190 | b3363 | REV | 3489747 | 3490319 | pORF_-_3489747 | equal  | npORF_-_3489747 | 3489747 | 3490253 | inside |
| EG12917 | php  | 292 | b3379 | REV | 3505734 | 3506612 |                |        |                 |         |         |        |
| EG11030 | trpS | 334 | b3384 | REV | 3510656 | 3511660 | pORF_-_3510656 | equal  | npORF_-_3510656 | 3510656 | 3511660 | equal  |
| EG10081 | aroK | 173 | b3390 | REV | 3516565 | 3517086 | pORF_-_3516565 | inside | npORF_-_3516565 | 3516565 | 3517086 | equal  |

|         |      |     |       |     |         |         |                |        |                 |         |         |        |
|---------|------|-----|-------|-----|---------|---------|----------------|--------|-----------------|---------|---------|--------|
| EG10560 | malP | 797 | b3417 | REV | 3548102 | 3550495 | pORF_-_3548102 | equal  | npORF_-_3548102 | 3548102 | 3550495 | equal  |
| EG10400 | glpR | 252 | b3423 | REV | 3557870 | 3558628 | pORF_-_3557870 | equal  | npORF_-_3557870 | 3557870 | 3558628 | equal  |
| EG10397 | glpG | 276 | b3424 | REV | 3558645 | 3559475 | pORF_-_3558645 | equal  | npORF_-_3558645 | 3558645 | 3559475 | equal  |
| EG10377 | glgA | 477 | b3429 | REV | 3564623 | 3566056 | pORF_-_3564623 | equal  | npORF_-_3564623 | 3564623 | 3566056 | equal  |
| EG10379 | glgC | 431 | b3430 | REV | 3566056 | 3567351 | pORF_-_3566056 | inside | npORF_-_3566056 | 3566056 | 3567351 | equal  |
| EG10088 | asd  | 367 | b3433 | REV | 3571798 | 3572901 | pORF_-_3571798 | inside | npORF_-_3571798 | 3571798 | 3572901 | equal  |
| EG12629 | gntK | 175 | b3437 | REV | 3575088 | 3575615 | pORF_-_3575088 | inside | npORF_-_3575088 | 3575088 | 3575576 | inside |
| EG10374 | ggt  | 580 | b3447 | REV | 3583104 | 3584846 | pORF_-_3583104 | inside | npORF_-_3583104 | 3583104 | 3584819 | inside |
| EG11047 | ugpB | 438 | b3453 | REV | 3589032 | 3590348 | pORF_-_3589032 | equal  | npORF_-_3589032 | 3589032 | 3590279 | inside |
| EG10540 | livK | 369 | b3458 | REV | 3594474 | 3595583 | pORF_-_3594474 | inside | npORF_-_3594474 | 3594474 | 3595550 | inside |
| EG10539 | livJ | 367 | b3460 | REV | 3596578 | 3597681 | pORF_-_3596578 | inside | npORF_-_3596578 | 3596578 | 3597696 | inside |
| EG10346 | ftsY | 497 | b3464 | REV | 3600773 | 3602266 | pORF_-_3600773 | equal  | npORF_-_3600773 | 3600773 | 3602266 | equal  |
| EG11441 | prlC | 680 | b3498 | REV | 3641163 | 3643205 | pORF_-_3641163 | inside | npORF_-_3641163 | 3641163 | 3643205 | equal  |
| EG11399 | hdeB | 108 | b3509 | REV | 3653989 | 3654315 | pORF_-_3653989 | inside | npORF_-_3653989 | 3653989 | 3654234 | inside |
| EG11398 | hdeA | 110 | b3510 | REV | 3654431 | 3654763 | pORF_-_3654431 | equal  | npORF_-_3654431 | 3654431 | 3654712 | inside |
| EG50009 | gadA | 466 | b3517 | REV | 3664203 | 3665603 | pORF_-_3664203 | inside | npORF_-_3664203 | 3664203 | 3665603 | equal  |
| EG12254 | yhjJ | 498 | b3527 | REV | 3678467 | 3679963 | pORF_-_3678467 | equal  | npORF_-_3678467 | 3678467 | 3679828 | inside |
| EG10248 | dppA | 535 | b3544 | REV | 3704121 | 3705728 | pORF_-_3704121 | equal  | npORF_-_3704121 | 3704121 | 3705671 | inside |
| EG10410 | glyS | 689 | b3559 | REV | 3720351 | 3722420 | pORF_-_3720351 | equal  | npORF_-_3720351 | 3720351 | 3722420 | equal  |
| EG12292 | aldB | 512 | b3588 | REV | 3752996 | 3754534 | pORF_-_3752996 | inside | npORF_-_3752996 | 3752996 | 3754534 | equal  |
| EG10942 | selB | 614 | b3590 | REV | 3756040 | 3757884 | pORF_-_3756040 | equal  | npORF_-_3756040 | 3756040 | 3757884 | equal  |
| EG10937 | secB | 155 | b3609 | REV | 3781684 | 3782151 | pORF_-_3781684 | equal  | npORF_-_3781684 | 3781684 | 3782151 | equal  |
| EG12294 | grxC | 83  | b3610 | REV | 3782214 | 3782465 | pORF_-_3782214 | equal  | npORF_-_3782214 | 3782214 | 3782465 | equal  |
| EG10993 | tdh  | 341 | b3616 | REV | 3788343 | 3789368 | pORF_-_3788343 | equal  | npORF_-_3788343 | 3788343 | 3789368 | equal  |
| EG10512 | kbl  | 398 | b3617 | REV | 3789378 | 3790574 | pORF_-_3789378 | equal  | npORF_-_3789378 | 3789378 | 3790574 | equal  |
| EG10329 | mutM | 269 | b3635 | REV | 3808366 | 3809175 | pORF_-_3808366 | equal  | npORF_-_3808366 | 3808366 | 3809175 | equal  |
| EG10891 | rpmG | 55  | b3636 | REV | 3809273 | 3809440 | pORF_-_3809273 | equal  | npORF_-_3809273 | 3809273 | 3809440 | equal  |
| EG10886 | rpmB | 78  | b3637 | REV | 3809461 | 3809697 | pORF_-_3809461 | equal  | npORF_-_3809461 | 3809461 | 3809697 | equal  |
| EG10808 | pyrE | 213 | b3642 | REV | 3813150 | 3813791 | pORF_-_3813150 | inside | npORF_-_3813150 | 3813150 | 3813791 | equal  |
| EG10863 | rph  | 238 | b3643 | REV | 3813886 | 3814572 | pORF_-_3813886 | inside | npORF_-_3813886 | 3813886 | 3814572 | equal  |
| EG11051 | uhpA | 196 | b3669 | REV | 3848159 | 3848749 | pORF_-_3848159 | equal  | npORF_-_3848159 | 3848159 | 3848839 | inside |
| EG11535 | ibpB | 142 | b3686 | REV | 3864492 | 3864920 | pORF_-_3864492 | inside | npORF_-_3864492 | 3864492 | 3864920 | equal  |
| EG11534 | ibpA | 137 | b3687 | REV | 3865032 | 3865445 | pORF_-_3865032 | inside | npORF_-_3865032 | 3865032 | 3865445 | equal  |
| EG20050 | dgoD | 382 | b4478 | REV | 3869873 | 3871021 | pORF_-_3869873 | equal  | npORF_-_3869873 | 3869873 | 3870823 | inside |
| EG10424 | gyrB | 804 | b3699 | REV | 3875728 | 3878142 | pORF_-_3875728 | inside | npORF_-_3875728 | 3875728 | 3878142 | equal  |
| EG10828 | recF | 357 | b3700 | REV | 3878171 | 3879244 | pORF_-_3878171 | equal  | npORF_-_3878171 | 3878171 | 3879082 | inside |
| EG10242 | dnaN | 366 | b3701 | REV | 3879244 | 3880344 | pORF_-_3879244 | equal  | npORF_-_3879244 | 3879244 | 3880344 | equal  |
| EG10735 | phoU | 241 | b3724 | REV | 3904876 | 3905601 | pORF_-_3904876 | inside | npORF_-_3904876 | 3904876 | 3905601 | equal  |
| EG10734 | pstS | 346 | b3728 | REV | 3908508 | 3909548 | pORF_-_3908508 | equal  | npORF_-_3908508 | 3908508 | 3909482 | inside |
| EG10382 | glmS | 609 | b3729 | REV | 3909862 | 3911691 | pORF_-_3909862 | equal  | npORF_-_3909862 | 3909862 | 3911691 | equal  |
| EG10100 | atpC | 139 | b3731 | REV | 3913576 | 3913995 | pORF_-_3913576 | equal  | npORF_-_3913576 | 3913576 | 3913995 | equal  |
| EG10101 | atpD | 460 | b3732 | REV | 3914016 | 3915398 | pORF_-_3914016 | equal  | npORF_-_3914016 | 3914016 | 3915398 | equal  |
| EG10104 | atpG | 287 | b3733 | REV | 3915425 | 3916288 | pORF_-_3915425 | equal  | npORF_-_3915425 | 3915425 | 3916327 | inside |
| EG10098 | atpA | 513 | b3734 | REV | 3916339 | 3917880 | pORF_-_3916339 | equal  | npORF_-_3916339 | 3916339 | 3917880 | equal  |
| EG10105 | atpH | 177 | b3735 | REV | 3917893 | 3918426 | pORF_-_3917893 | equal  | npORF_-_3917893 | 3917893 | 3918426 | equal  |
| EG10103 | atpF | 156 | b3736 | REV | 3918441 | 3918911 | pORF_-_3918441 | equal  | npORF_-_3918441 | 3918441 | 3918824 | inside |

|         |      |     |       |     |         |         |                |        |                 |         |         |        |
|---------|------|-----|-------|-----|---------|---------|----------------|--------|-----------------|---------|---------|--------|
| EG10102 | atpE | 79  | b3737 | REV | 3918973 | 3919212 | pORF_-_3918973 | equal  | npORF_-_3918973 | 3918973 | 3919164 | inside |
| EG10106 | atpI | 126 | b3739 | REV | 3920083 | 3920463 |                |        |                 |         |         |        |
| EG11199 | miuC | 147 | b3742 | REV | 3924035 | 3924478 | pORF_-_3924035 | equal  | npORF_-_3924035 | 3924035 | 3924478 | equal  |
| EG12352 | ppiC | 93  | b3775 | REV | 3957555 | 3957836 | pORF_-_3957555 | equal  | npORF_-_3957555 | 3957555 | 3957836 | equal  |
| EG10844 | rhIB | 421 | b3780 | REV | 3962388 | 3963653 | pORF_-_3962388 | equal  | npORF_-_3962388 | 3962388 | 3963653 | equal  |
| EG10433 | hemX | 393 | b3803 | REV | 3985908 | 3987089 | pORF_-_3985908 | equal  | npORF_-_3985908 | 3985908 | 3987062 | inside |
| EG10429 | hemC | 313 | b3805 | REV | 3987848 | 3988789 | pORF_-_3987848 | inside | npORF_-_3987848 | 3987848 | 3988711 | inside |
| EG10591 | metR | 317 | b3828 | REV | 4009886 | 4010839 | pORF_-_4009886 | equal  | npORF_-_4009886 | 4009886 | 4010803 | inside |
| EG10278 | fadA | 387 | b3845 | REV | 4025632 | 4026795 | pORF_-_4025632 | equal  | npORF_-_4025632 | 4025632 | 4026795 | equal  |
| EG10279 | fadB | 729 | b3846 | REV | 4026805 | 4028994 | pORF_-_4026805 | inside | npORF_-_4026805 | 4026805 | 4028994 | equal  |
| EG11828 | mobB | 175 | b3856 | REV | 4038929 | 4039456 |                |        |                 |         |         |        |
| EG11829 | mobA | 194 | b3857 | REV | 4039438 | 4040022 | pORF_-_4039438 | equal  | npORF_-_4039438 | 4039438 | 4039872 | inside |
| EG10387 | glnL | 349 | b3869 | REV | 4053313 | 4054362 | pORF_-_4053313 | equal  | npORF_-_4053313 | 4053313 | 4054032 | inside |
| EG10383 | glnA | 469 | b3870 | REV | 4054648 | 4056057 | pORF_-_4054648 | equal  | npORF_-_4054648 | 4054648 | 4056057 | equal  |
| EG13374 | ompL | 230 | b3875 | REV | 4061626 | 4062318 |                |        |                 |         |         |        |
| EG11015 | tpiA | 255 | b3919 | REV | 4108763 | 4109530 | pORF_-_4108763 | equal  | npORF_-_4108763 | 4108763 | 4109530 | equal  |
| EG11518 | fpr  | 248 | b3924 | REV | 4111749 | 4112495 | pORF_-_4111749 | equal  | npORF_-_4111749 | 4111749 | 4112462 | inside |
| EG10398 | glpK | 502 | b3926 | REV | 4113737 | 4115245 | pORF_-_4113737 | inside | npORF_-_4113737 | 4113737 | 4115266 | inside |
| EG11676 | hslV | 176 | b3932 | REV | 4119780 | 4120310 | pORF_-_4119780 | equal  | npORF_-_4119780 | 4119780 | 4120310 | equal  |
| EG10763 | priA | 732 | b3935 | REV | 4122635 | 4124833 | pORF_-_4122635 | inside | npORF_-_4122635 | 4122635 | 4124833 | equal  |
| EG10588 | metJ | 105 | b3938 | REV | 4126101 | 4126418 | pORF_-_4126101 | inside | npORF_-_4126101 | 4126101 | 4126418 | equal  |
| EG11428 | sthA | 466 | b3962 | REV | 4157413 | 4158813 | pORF_-_4157413 | equal  | npORF_-_4157413 | 4157413 | 4158813 | equal  |
| EG11022 | trmA | 366 | b3965 | REV | 4160193 | 4161293 | pORF_-_4160193 | equal  | npORF_-_4160193 | 4160193 | 4161293 | equal  |
| EG11738 | rsd  | 158 | b3995 | REV | 4194355 | 4194831 | pORF_-_4194355 | equal  | npORF_-_4194355 | 4194355 | 4194693 | inside |
| EG11918 | zraP | 141 | b4002 | REV | 4199286 | 4199711 |                |        |                 |         |         |        |
| EG10795 | purH | 529 | b4006 | REV | 4203966 | 4205555 | pORF_-_4203966 | equal  | npORF_-_4203966 | 4203966 | 4205555 | equal  |
| EG10491 | iclR | 274 | b4018 | REV | 4220827 | 4221651 | pORF_-_4220827 | inside | npORF_-_4220827 | 4220827 | 4221651 | equal  |
| EG10550 | lysC | 449 | b4024 | REV | 4229907 | 4231256 | pORF_-_4229907 | equal  | npORF_-_4229907 | 4229907 | 4231256 | equal  |
| EG10554 | malE | 396 | b4034 | REV | 4243252 | 4244442 | pORF_-_4243252 | equal  | npORF_-_4243252 | 4243252 | 4244388 | inside |
| EG10740 | plsB | 807 | b4041 | REV | 4252066 | 4254489 | pORF_-_4252066 | inside | npORF_-_4252066 | 4252066 | 4254489 | equal  |
| EG11929 | zur  | 171 | b4046 | REV | 4257511 | 4258026 | pORF_-_4257511 | inside | npORF_-_4257511 | 4257511 | 4257933 | inside |
| EG11061 | uvrA | 940 | b4058 | REV | 4269072 | 4271894 | pORF_-_4269072 | equal  | npORF_-_4269072 | 4269072 | 4271894 | equal  |
| EG10958 | soxS | 107 | b4062 | REV | 4275083 | 4275406 |                |        |                 |         |         |        |
| EG10285 | fdhF | 715 | b4079 | REV | 4295242 | 4297389 |                |        |                 |         |         |        |
| EG11501 | adiA | 755 | b4117 | REV | 4336277 | 4338544 | pORF_-_4336277 | inside | npORF_-_4336277 | 4336277 | 4337947 | inside |
| EG10553 | lysU | 505 | b4129 | REV | 4351223 | 4352740 | pORF_-_4351223 | inside | npORF_-_4351223 | 4351223 | 4352740 | equal  |
| EG10131 | cadA | 715 | b4131 | REV | 4354493 | 4356640 | pORF_-_4354493 | inside | npORF_-_4354493 | 4354493 | 4355458 | inside |
| EG12178 | dsbD | 565 | b4136 | REV | 4361368 | 4363065 | pORF_-_4361368 | inside | npORF_-_4361368 | 4361368 | 4361514 | inside |
| EG10095 | aspA | 478 | b4139 | REV | 4364914 | 4366350 | pORF_-_4364914 | inside | npORF_-_4364914 | 4364914 | 4366350 | equal  |
| EG10040 | ampC | 377 | b4150 | REV | 4375834 | 4376967 | pORF_-_4375834 | inside | npORF_-_4375834 | 4375834 | 4376967 | equal  |
| EG10331 | frdB | 244 | b4153 | REV | 4377806 | 4378540 | pORF_-_4377806 | inside | npORF_-_4377806 | 4377806 | 4378507 | inside |
| EG10775 | psd  | 322 | b4160 | REV | 4387415 | 4388383 | pORF_-_4387415 | equal  | npORF_-_4387415 | 4387415 | 4388383 | equal  |
| EG10160 | cpdB | 647 | b4213 | REV | 4432645 | 4434588 | pORF_-_4432645 | inside | npORF_-_4432645 | 4432645 | 4434540 | inside |
| EG12510 | ytfJ | 184 | b4216 | REV | 4436731 | 4437285 | pORF_-_4436731 | equal  | npORF_-_4436731 | 4436731 | 4436949 | inside |
| EG11433 | msrA | 212 | b4219 | REV | 4439561 | 4440199 | pORF_-_4439561 | inside | npORF_-_4439561 | 4439561 | 4440199 | equal  |
| EG10755 | ppa  | 176 | b4226 | REV | 4447145 | 4447675 | pORF_-_4447145 | equal  | npORF_-_4447145 | 4447145 | 4447675 | equal  |

|         |      |     |       |     |         |         |                |        |                 |         |         |        |
|---------|------|-----|-------|-----|---------|---------|----------------|--------|-----------------|---------|---------|--------|
| EG11417 | nrdD | 712 | b4238 | REV | 4458545 | 4460683 | pORF_-_4458545 | equal  | npORF_-_4458545 | 4458545 | 4460476 | inside |
| EG12524 | yjgF | 128 | b4243 | REV | 4468550 | 4468936 | pORF_-_4468550 | inside | npORF_-_4468550 | 4468550 | 4468936 | equal  |
| EG10811 | pyrI | 153 | b4244 | REV | 4469009 | 4469470 | pORF_-_4469009 | equal  | npORF_-_4469009 | 4469009 | 4469470 | equal  |
| EG10805 | pyrB | 311 | b4245 | REV | 4469483 | 4470418 | pORF_-_4469483 | equal  | npORF_-_4469483 | 4469483 | 4470418 | equal  |
| EG10069 | argI | 334 | b4254 | REV | 4475330 | 4476334 | pORF_-_4475330 | equal  | npORF_-_4475330 | 4475330 | 4476334 | equal  |
| EG11067 | valS | 951 | b4258 | REV | 4479005 | 4481860 | pORF_-_4479005 | equal  | npORF_-_4479005 | 4479005 | 4481860 | equal  |
| EG11413 | holC | 147 | b4259 | REV | 4481860 | 4482303 | pORF_-_4481860 | equal  | npORF_-_4481860 | 4481860 | 4482189 | inside |
| EG10694 | pepA | 503 | b4260 | REV | 4482463 | 4483974 | pORF_-_4482463 | equal  | npORF_-_4482463 | 4482463 | 4483974 | equal  |
| EG10286 | fecA | 774 | b4291 | REV | 4512376 | 4514700 | pORF_-_4512376 | equal  | npORF_-_4512376 | 4512376 | 4514664 | inside |
| EG12567 | iadA | 390 | b4328 | REV | 4556377 | 4557549 | pORF_-_4556377 | equal  | npORF_-_4556377 | 4556377 | 4557549 | equal  |
| EG10575 | mcrC | 348 | b4345 | REV | 4574935 | 4575981 | pORF_-_4574935 | inside | npORF_-_4574935 | 4574935 | 4576092 | inside |
| EG10574 | mcrB | 459 | b4346 | REV | 4575981 | 4577360 | pORF_-_4575981 | inside | npORF_-_4575981 | 4575981 | 4576877 | inside |
| EG10237 | dnaC | 245 | b4361 | REV | 4598261 | 4598998 | pORF_-_4598261 | equal  | npORF_-_4598261 | 4598261 | 4598842 | inside |
| EG10244 | dnaT | 179 | b4362 | REV | 4599001 | 4599540 | pORF_-_4599001 | inside | npORF_-_4599001 | 4599001 | 4599450 | inside |
| EG12596 | rsmC | 343 | b4371 | REV | 4604692 | 4605723 | pORF_-_4604692 | equal  | npORF_-_4604692 | 4604692 | 4605723 | equal  |
| EG11796 | lplA | 338 | b4386 | REV | 4621124 | 4622140 | pORF_-_4621124 | equal  | npORF_-_4621124 | 4621124 | 4621960 | inside |
| EG12343 | yjjK | 555 | b4391 | REV | 4626878 | 4628545 | pORF_-_4626878 | equal  | npORF_-_4626878 | 4626878 | 4628545 | equal  |
| EG11366 | rob  | 289 | b4396 | REV | 4632464 | 4633333 | pORF_-_4632464 | equal  | npORF_-_4632464 | 4632464 | 4633333 | equal  |
| EG10061 | arcA | 238 | b4401 | REV | 4637613 | 4638329 | pORF_-_4637613 | equal  | npORF_-_4637613 | 4637613 | 4638329 | equal  |
