# Supplementary material
Source: PubMed Central journal article supplement (PMC3832199)
Supplement: NIHMS251755-supplement-Supplement_Table10.pdf [file NIHMS251755-supplement-Supplement_Table10.pdf]

**Supplementary Table 10: Mapping pORFs to RTSs.** Abbreviations: U, uncharacterized ORF

| <b>pORF</b>  | <b>bnum</b> | <b>Gene</b> | <b>Note</b> | <b>RTS</b> |
|--------------|-------------|-------------|-------------|------------|
| pORF+_337    | b0002       | thrA        |             | RTS_R4+_1  |
| pORF+_2801   | b0003       | thrB        |             | RTS_R4+_2  |
| pORF+_3734   | b0004       | thrC        |             | RTS_R4+_2  |
| pORF+_8175   | b0008       | talB        |             | RTS_R4+_4  |
| pORF+_9303   | b0009       | mog         | U           | RTS_R4+_5  |
| pORF+_12163  | b0014       | dnaK        |             | RTS_R4+_6  |
| pORF+_14138  | b0015       | dnaJ        |             | RTS_R4+_7  |
| pORF+_15439  | b0016       | insL        |             | RTS_R4+_8  |
| pORF+_21407  | b0025       | ribF        |             | RTS_R4+_13 |
| pORF+_22391  | b0026       | ileS        |             | RTS_R4+_13 |
| pORF+_25826  | b0028       | fkpB        |             | RTS_R4+_15 |
| pORF+_26193  | b0029       | ispH        |             | RTS_R4+_15 |
| pORF+_27293  | b0030       | rihC        |             | RTS_R4+_15 |
| pORF+_28374  | b0031       | dapB        |             | RTS_R4+_16 |
| pORF+_29624  | b0032       | carA        |             | RTS_R4+_17 |
| pORF+_30817  | b0033       | carB        |             | RTS_R4+_17 |
| pORF+_34195  | b0034       | caiF        |             | RTS_R4+_18 |
| pORF+_44180  | b0043       | fixC        | U           |            |
| pORF+_47246  | b0046       | kefF        |             | RTS_R4+_19 |
| pORF+_47673  | b0047       | kefC        |             | RTS_R4+_19 |
| pORF+_49688  | b0048       | folA        |             | RTS_R4+_20 |
| pORF+_57319  | b0055       | djIA        |             | RTS_R4+_21 |
| pORF+_70336  | b0064       | araC        |             | RTS_R4+_23 |
| pORF+_85540  | b0077       | ilvI        |             | RTS_R4+_27 |
| pORF+_87327  | b0078       | ilvH        |             | RTS_R4+_27 |
| pORF+_88028  | b0080       | fruR        |             | RTS_R4+_28 |
| pORF+_89598  | b0081       | mraZ        | U           | RTS_R4+_29 |
| pORF+_89965  | b0082       | mraW        |             | RTS_R4+_30 |
| pORF+_91032  | b0083       | ftsL        |             | RTS_R4+_32 |
| pORF+_93166  | b0085       | murE        |             | RTS_R4+_33 |
| pORF+_94650  | b0086       | murF        |             | RTS_R4+_33 |
| pORF+_97087  | b0088       | murD        |             | RTS_R4+_33 |
| pORF+_98400  | b0089       | ftsW        |             | RTS_R4+_33 |
| pORF+_99644  | b0090       | murG        |             | RTS_R4+_33 |
| pORF+_100765 | b0091       | murC        |             | RTS_R4+_34 |
| pORF+_102233 | b0092       | ddlB        |             | RTS_R4+_34 |
| pORF+_103155 | b0093       | ftsQ        |             | RTS_R4+_35 |
| pORF+_103982 | b0094       | ftsA        |             | RTS_R4+_35 |
| pORF+_105305 | b0095       | ftsZ        |             | RTS_R4+_36 |
| pORF+_106557 | b0096       | lpxC        |             | RTS_R4+_37 |
| pORF+_108279 | b0098       | secA        |             | RTS_R4+_39 |
| pORF+_113444 | b0104       | guaC        |             | RTS_R4+_40 |
| pORF+_118733 | b0110       | ampD        |             | RTS_R4+_41 |
| pORF+_119242 | b0111       | ampE        | U           | RTS_R4+_41 |
| pORF+_122059 | b0113       | pdhR        |             | RTS_R4+_42 |
| pORF+_123017 | b0114       | aceE        |             | RTS_R4+_43 |
| pORF+_125695 | b0115       | aceF        |             | RTS_R4+_43 |
| pORF+_127879 | b0116       | lpd         |             | RTS_R4+_44 |
| pORF+_131462 | b0118       | acnB        |             | RTS_R4+_47 |
| pORF+_134340 | b0119       | yacl        | U           | RTS_R4+_48 |
| pORF+_137044 | b0123       | cueO        |             | RTS_R4+_49 |
| pORF+_141356 | b0125       | hpt         |             | RTS_R4+_50 |
| pORF+_142779 | b0127       | yadG        | U           | RTS_R4+_51 |
| pORF+_162060 | b0148       | hrpB        | U           | RTS_R4+_54 |
| pORF+_164715 | b0149       | mrcB        |             | RTS_R4+_55 |
| pORF+_167484 | b0150       | fhuA        |             | RTS_R4+_56 |
| pORF+_169736 | b0151       | fhuC        |             | RTS_R4+_57 |
| pORF+_170572 | b0152       | fhuD        |             | RTS_R4+_57 |
| pORF+_171462 | b0153       | fhuB        |             | RTS_R4+_57 |
| pORF+_176577 | b0156       | erpA        | U           | RTS_R4+_59 |
| pORF+_179237 | b0160       | dgt         |             | RTS_R4+_60 |

|              |       |      |   |             |
|--------------|-------|------|---|-------------|
| pORF+_180884 | b0161 | degP |   | RTS_R4+_61  |
| pORF+_189676 | b0169 | rpsB |   | RTS_R4+_64  |
| pORF+_190857 | b0170 | tsf  |   | RTS_R4+_64  |
| pORF+_191855 | b0171 | pyrH |   | RTS_R4+_65  |
| pORF+_192872 | b0172 | frr  |   | RTS_R4+_66  |
| pORF+_193521 | b0173 | dxr  |   | RTS_R4+_66  |
| pORF+_194903 | b0174 | ispU |   | RTS_R4+_67  |
| pORF+_196501 | b0176 | rseP |   | RTS_R4+_68  |
| pORF+_197928 | b0177 | bamA | U | RTS_R4+_69  |
| pORF+_200482 | b0178 | skp  |   | RTS_R4+_70  |
| pORF+_200971 | b0179 | lpxD |   | RTS_R4+_70  |
| pORF+_202008 | b0180 | fabZ |   | RTS_R4+_71  |
| pORF+_202560 | b0181 | lpxA |   | RTS_R4+_71  |
| pORF+_203348 | b0182 | lpxB |   | RTS_R4+_71  |
| pORF+_205126 | b0184 | dnaE |   | RTS_R4+_71  |
| pORF+_208621 | b0185 | accA |   | RTS_R4+_72  |
| pORF+_209679 | b0186 | ldcC |   | RTS_R4+_73  |
| pORF+_211850 | b0187 | yaeR | U | RTS_R4+_74  |
| pORF+_212331 | b0188 | tilS |   | RTS_R4+_74  |
| pORF+_215269 | b0192 | nlpE |   | RTS_R4+_76  |
| pORF+_222833 | b0200 | gmhB |   | RTS_R4+_77  |
| pORF+_229167 | b0207 | dkgB |   | RTS_R4+_80  |
| pORF+_231122 | b0209 | yafD | U | RTS_R4+_81  |
| pORF+_236058 | b0215 | dnaQ |   | RTS_R4+_83  |
| pORF+_239154 | b4503 | yafF | U |             |
| pORF+_240343 | b0220 | ivy  |   | RTS_R4+_85  |
| pORF+_243510 | b0222 | lpcA |   | RTS_R4+_86  |
| pORF+_244312 | b0223 | yafJ | U | RTS_R4+_86  |
| pORF+_249937 | b0230 | lafU | U | RTS_R4+_89  |
| pORF+_255977 | b0238 | gpt  |   | RTS_R4+_93  |
| pORF+_256527 | b0239 | frsA |   | RTS_R4+_94  |
| pORF+_257829 | b0240 | crl  |   | RTS_R4+_95  |
| pORF+_259525 | b0242 | proB |   | RTS_R4+_96  |
| pORF+_260727 | b0243 | proA |   | RTS_R4+_96  |
| pORF+_265665 |       |      |   |             |
| pORF+_274525 | b0260 | mmuP | U | RTS_R4+_101 |
| pORF+_275795 | b0261 | mmuM |   | RTS_R4+_101 |
| pORF+_281481 | b0268 | yagE | U |             |
| pORF+_282404 | b0269 | yagF | U |             |
| pORF+_284619 | b0270 | yagG | U |             |
| pORF+_302215 | b0287 | yagU | U | RTS_R4+_108 |
| pORF+_314506 | b0298 | insE |   | RTS_R4+_110 |
| pORF+_314811 | b0299 | insF |   | RTS_R4+_110 |
| pORF+_320832 | b0306 | ykgE | U | RTS_R4+_112 |
| pORF+_321562 | b0307 | ykgF | U | RTS_R4+_112 |
| pORF+_322829 | b0308 | ykgG | U | RTS_R4+_112 |
| pORF+_331589 | b0315 | yahA | U | RTS_R4+_115 |
| pORF+_334504 | b0318 | yahD | U | RTS_R4+_116 |
| pORF+_335149 | b0319 | yahE | U | RTS_R4+_116 |
| pORF+_336002 | b0320 | yahF | U | RTS_R4+_116 |
| pORF+_337549 | b0321 | yahG | U | RTS_R4+_116 |
| pORF+_339389 | b0323 | yahI | U | RTS_R4+_117 |
| pORF+_340349 | b0324 | yahJ | U | RTS_R4+_118 |
| pORF+_342108 | b0325 | yahK | U | RTS_R4+_119 |
| pORF+_345708 | b0329 | yahO | U | RTS_R4+_121 |
| pORF+_347906 | b0331 | prpB |   | RTS_R4+_122 |
| pORF+_349236 | b0333 | prpC |   | RTS_R4+_122 |
| pORF+_350439 | b0334 | prpD |   | RTS_R4+_122 |
| pORF+_352003 |       |      |   | RTS_R4+_122 |
| pORF+_352501 |       |      |   | RTS_R4+_122 |
| pORF+_354146 | b0336 | codB |   | RTS_R4+_123 |
| pORF+_355380 | b0337 | codA |   | RTS_R4+_123 |
| pORF+_370400 | b0349 | mhpC |   | RTS_R4+_124 |

|              |       |      |   |             |
|--------------|-------|------|---|-------------|
| pORF+_374638 | b0353 | mhpT | U | RTS_R4+_125 |
| pORF+_375879 | b0354 | yaiL |   | RTS_R4+_126 |
| pORF+_384399 | b0365 | tauA |   | RTS_R4+_129 |
| pORF+_385431 | b0366 | tauB |   | RTS_R4+_129 |
| pORF+_386195 | b0367 | tauC |   | RTS_R4+_129 |
| pORF+_387019 | b0368 | tauD |   | RTS_R4+_129 |
| pORF+_397096 | b0378 | yaiW | U | RTS_R4+_132 |
| pORF+_400610 | b0382 | iraP | U | RTS_R4+_134 |
| pORF+_400902 | b0383 | phoA |   | RTS_R4+_135 |
| pORF+_402487 | b0384 | psiF | U | RTS_R4+_135 |
| pORF+_404868 | b0387 | yaiI | U | RTS_R4+_137 |
| pORF+_405629 | b0388 | aroL |   | RTS_R4+_138 |
| pORF+_406203 | b0389 | yaiA | U | RTS_R4+_139 |
| pORF+_406652 | b0390 | aroM | U | RTS_R4+_140 |
| pORF+_407401 | b0391 | yaiE | U | RTS_R4+_141 |
| pORF+_409230 | b0394 | mak  |   | RTS_R4+_143 |
| pORF+_416366 | b0399 | phoB |   | RTS_R4+_145 |
| pORF+_417113 | b0400 | phoR |   | RTS_R4+_145 |
| pORF+_420207 | b0402 | proY | U | RTS_R4+_147 |
| pORF+_421739 | b0403 | malZ |   | RTS_R4+_148 |
| pORF+_424235 | b0405 | queA |   | RTS_R4+_149 |
| pORF+_425361 | b0406 | tgt  |   | RTS_R4+_149 |
| pORF+_426481 | b0407 | yajC |   | RTS_R4+_151 |
| pORF+_426871 | b0408 | secD |   | RTS_R4+_152 |
| pORF+_428684 | b0409 | secF |   | RTS_R4+_152 |
| pORF+_432226 | b0413 | nrdR | U | RTS_R4+_154 |
| pORF+_432679 | b0414 | ribD |   | RTS_R4+_154 |
| pORF+_433775 | b0415 | ribE |   | RTS_R4+_155 |
| pORF+_434361 | b0416 | nusB |   | RTS_R4+_155 |
| pORF+_434858 | b0417 | thiL |   | RTS_R4+_155 |
| pORF+_440773 | b0423 | thiI |   | RTS_R4+_158 |
| pORF+_443739 | b0426 | yajQ | U | RTS_R4+_159 |
| pORF+_453663 | b0435 | bolA |   | RTS_R4+_160 |
| pORF+_454357 | b0436 | tig  |   | RTS_R4+_161 |
| pORF+_455901 | b0437 | clpP |   | RTS_R4+_162 |
| pORF+_456650 | b0438 | clpX |   | RTS_R4+_162 |
| pORF+_458067 | b0439 | lon  |   | RTS_R4+_163 |
| pORF+_460675 | b0440 | hupB |   | RTS_R4+_165 |
| pORF+_461139 | b0441 | ppiD |   | RTS_R4+_166 |
| pORF+_463626 | b0443 | ybaW | U | RTS_R4+_166 |
| pORF+_468095 | b0448 | mdIA | U | RTS_R4+_168 |
| pORF+_469746 | b0449 | mdIB | U | RTS_R4+_169 |
| pORF+_471684 | b0450 | glnK |   | RTS_R4+_170 |
| pORF+_474603 | b0453 | ybaY | U | RTS_R4+_172 |
| pORF+_485760 | b0465 | kefA | U | RTS_R4+_177 |
| pORF+_490582 | b0469 | apt  |   | RTS_R4+_179 |
| pORF+_491316 | b0470 | dnaX |   | RTS_R4+_180 |
| pORF+_493285 | b0471 | ybaB | U | RTS_R4+_181 |
| pORF+_493629 | b0472 | recR |   | RTS_R4+_181 |
| pORF+_494344 | b0473 | htpG |   | RTS_R4+_182 |
| pORF+_496339 | b0474 | adk  |   | RTS_R4+_183 |
| pORF+_497279 | b0475 | hemH |   | RTS_R4+_184 |
| pORF+_499349 | b0477 | gsk  |   | RTS_R4+_185 |
| pORF+_504138 | b0480 | ushA |   | RTS_R4+_186 |
| pORF+_507388 | b0483 | ybaQ | U | RTS_R4+_188 |
| pORF+_510865 | b0485 | ybaS | U | RTS_R4+_189 |
| pORF+_513217 | b0487 | cueR |   | RTS_R4+_190 |
| pORF+_515143 | b0490 | ybbL | U | RTS_R4+_191 |
| pORF+_518957 | b0495 | ybbA | U | RTS_R4+_192 |
| pORF+_519640 | b0496 | ybbP | U | RTS_R4+_192 |
| pORF+_522485 | b0497 | rhdD | U | RTS_R4+_193 |
| pORF+_532235 | b0506 | allR |   | RTS_R4+_196 |
| pORF+_533050 | b0507 | gcl  |   | RTS_R4+_198 |

|              |       |      |   |             |
|--------------|-------|------|---|-------------|
| pORF+_534934 | b0508 | hyi  |   |             |
| pORF+_535810 | b0509 | glxR |   |             |
| pORF+_548757 | b0520 | ylbF | U |             |
| pORF+_553834 | b0526 | cysS |   | RTS_R4+_200 |
| pORF+_566056 | b0540 | insE |   | RTS_R4+_202 |
| pORF+_566361 | b0541 | insF |   | RTS_R4+_202 |
| pORF+_594823 | b0572 | cusC |   |             |
| pORF+_596354 | b0573 | cusF |   | RTS_R4+_211 |
| pORF+_596702 | b0574 | cusB |   | RTS_R4+_211 |
| pORF+_597937 | b0575 | cusA |   | RTS_R4+_211 |
| pORF+_601146 | b0576 | pheP |   | RTS_R4+_212 |
| pORF+_607282 | b0582 | insL |   | RTS_R4+_213 |
| pORF+_611960 | b0585 | fes  |   | RTS_R4+_214 |
| pORF+_613159 | b4511 | ybdZ | U | RTS_R4+_214 |
| pORF+_613242 | b0586 | entF |   | RTS_R4+_214 |
| pORF+_621523 | b0591 | entS | U | RTS_R4+_215 |
| pORF+_624096 | b0593 | entC |   | RTS_R4+_216 |
| pORF+_625293 | b0594 | entE |   | RTS_R4+_216 |
| pORF+_626917 | b0595 | entB |   | RTS_R4+_216 |
| pORF+_627744 | b0596 | entA |   | RTS_R4+_216 |
| pORF+_628523 | b0597 | ybdB | U | RTS_R4+_216 |
| pORF+_629117 | b0598 | cstA |   | RTS_R4+_217 |
| pORF+_632809 | b0600 | ybdL |   | RTS_R4+_218 |
| pORF+_638168 | b0605 | ahpC |   | RTS_R4+_219 |
| pORF+_638946 | b0606 | ahpF |   | RTS_R4+_219 |
| pORF+_647226 |       |      |   |             |
| pORF+_653085 | b0620 | dpiA |   | RTS_R4+_221 |
| pORF+_656485 | b0623 | cspE |   | RTS_R4+_223 |
| pORF+_658170 | b0627 | tatE |   | RTS_R4+_225 |
| pORF+_674241 | b0643 | ybeL | U | RTS_R4+_227 |
| pORF+_694318 | b0662 | ubiF |   | RTS_R4+_228 |
| pORF+_703167 | b0679 | nagE |   | RTS_R4+_230 |
| pORF+_705316 | b0680 | glnS |   | RTS_R4+_231 |
| pORF+_709013 | b0682 | ybfN | U |             |
| pORF+_712075 | b0687 | seqA |   | RTS_R4+_233 |
| pORF+_712730 | b0688 | pgm  |   | RTS_R4+_233 |
| pORF+_736123 | b0705 | ybfL | U |             |
| pORF+_742050 | b0710 | ybgI | U | RTS_R4+_240 |
| pORF+_742816 | b0711 | ybgJ | U | RTS_R4+_240 |
| pORF+_743466 | b0712 | ybgK | U | RTS_R4+_240 |
| pORF+_745158 | b0714 | nei  |   | RTS_R4+_241 |
| pORF+_754783 | b0722 | sdhD |   | RTS_R4+_244 |
| pORF+_755118 | b0723 | sdhA |   | RTS_R4+_244 |
| pORF+_756912 | b0724 | sdhB |   | RTS_R4+_244 |
| pORF+_757929 | b0726 | sucA |   | RTS_R4+_245 |
| pORF+_760745 | b0727 | sucB |   | RTS_R4+_245 |
| pORF+_762237 | b0728 | sucC |   | RTS_R4+_245 |
| pORF+_763403 | b0729 | sucD |   | RTS_R4+_245 |
| pORF+_770678 | b0733 | cydA |   | RTS_R4+_247 |
| pORF+_772265 | b0734 | cydB |   | RTS_R4+_247 |
| pORF+_773975 | b0736 | ybgC | U | RTS_R4+_250 |
| pORF+_774376 | b0737 | tolQ |   | RTS_R4+_250 |
| pORF+_775072 | b0738 | tolR |   | RTS_R4+_250 |
| pORF+_775565 | b0739 | tolA |   | RTS_R4+_250 |
| pORF+_776960 | b0740 | tolB |   | RTS_R4+_251 |
| pORF+_778266 | b0741 | pal  |   | RTS_R4+_251 |
| pORF+_778821 | b0742 | ybgF | U | RTS_R4+_251 |
| pORF+_781308 | b0750 | nadA |   | RTS_R4+_255 |
| pORF+_784856 | b0754 | aroG |   | RTS_R4+_257 |
| pORF+_794312 | b0763 | modA |   | RTS_R4+_260 |
| pORF+_795777 | b0765 | modC |   | RTS_R4+_260 |
| pORF+_797809 | b0767 | pgl  |   | RTS_R4+_262 |
| pORF+_808567 | b0775 | bioB |   | RTS_R4+_263 |

|                |       |      |   |             |
|----------------|-------|------|---|-------------|
| pORF_+_809604  | b0776 | bioF |   | RTS_R4+_263 |
| pORF_+_811487  | b0778 | bioD |   | RTS_R4+_263 |
| pORF_+_812749  | b0779 | uvrB |   | RTS_R4+_264 |
| pORF_+_816186  | b0781 | moaA |   | RTS_R4+_265 |
| pORF_+_817278  | b0782 | moaB |   | RTS_R4+_266 |
| pORF_+_817793  | b0783 | moaC |   | RTS_R4+_266 |
| pORF_+_818208  | b0784 | moaD |   | RTS_R4+_266 |
| pORF_+_818518  | b0785 | moaE |   | RTS_R4+_266 |
| pORF_+_830095  | b0797 | rhIE |   | RTS_R4+_270 |
| pORF_+_834471  | b0800 | ybiB | U | RTS_R4+_272 |
| pORF_+_835574  | b0801 | ybiC | U | RTS_R4+_273 |
| pORF_+_841474  | b0807 | rlmF | U | RTS_R4+_275 |
| pORF_+_849667  | b0814 | ompX |   | RTS_R4+_276 |
| pORF_+_852406  | b0817 | mntR |   | RTS_R4+_277 |
| pORF_+_855186  | b0820 | ybiT | U | RTS_R4+_278 |
| pORF_+_862793  | b0825 | fsaA |   | RTS_R4+_280 |
| pORF_+_865791  | b0828 | iaaA |   | RTS_R4+_281 |
| pORF_+_866635  | b0829 | gsiA | U | RTS_R4+_281 |
| pORF_+_868367  | b0830 | gsiB | U | RTS_R4+_281 |
| pORF_+_870190  | b0831 | gsiC | U | RTS_R4+_281 |
| pORF_+_871113  | b0832 | gsiD | U | RTS_R4+_282 |
| pORF_+_872124  | b0833 | yliE | U | RTS_R4+_283 |
| pORF_+_874558  | b0834 | yliF | U | RTS_R4+_283 |
| pORF_+_879929  | b0839 | dacC |   | RTS_R4+_286 |
| pORF_+_890407  | b0851 | nfsA |   | RTS_R4+_290 |
| pORF_+_891190  | b0852 | rimK |   | RTS_R4+_291 |
| pORF_+_892857  | b0854 | potF |   | RTS_R4+_293 |
| pORF_+_894133  | b0855 | potG |   | RTS_R4+_293 |
| pORF_+_897741  | b0859 | rumB |   | RTS_R4+_295 |
| pORF_+_903816  | b0866 | ybjQ | U | RTS_R4+_296 |
| pORF_+_904136  | b0867 | amiD | U | RTS_R4+_296 |
| pORF_+_915696  | b0876 | ybjD | U | RTS_R4+_299 |
| pORF_+_918431  | b0878 | macA |   | RTS_R4+_300 |
| pORF_+_919570  | b0879 | macB |   | RTS_R4+_300 |
| pORF_+_922472  | b0882 | clpA |   | RTS_R4+_302 |
| pORF_+_931764  | b0889 | lrp  |   | RTS_R4+_303 |
| pORF_+_932447  | b0890 | ftsK |   | RTS_R4+_304 |
| pORF_+_936592  | b0891 | lolA |   | RTS_R4+_305 |
| pORF_+_937217  | b0892 | rarA |   | RTS_R4+_305 |
| pORF_+_938651  | b0893 | serS |   | RTS_R4+_306 |
| pORF_+_940182  | b0894 | dmsA |   | RTS_R4+_307 |
| pORF_+_942637  | b0895 | dmsB |   | RTS_R4+_307 |
| pORF_+_948891  | b0901 | ycaK | U | RTS_R4+_310 |
| pORF_+_956876  | b0907 | serC |   | RTS_R4+_312 |
| pORF_+_958035  | b0908 | aroA |   | RTS_R4+_312 |
| pORF_+_959463  | b0909 | ycaL | U | RTS_R4+_313 |
| pORF_+_960424  | b0910 | cmk  |   | RTS_R4+_314 |
| pORF_+_961218  | b0911 | rpsA |   | RTS_R4+_315 |
| pORF_+_963051  | b0912 | ihfB |   | RTS_R4+_316 |
| pORF_+_963465  | b0913 | ycaI | U | RTS_R4+_317 |
| pORF_+_965844  | b0914 | msbA |   | RTS_R4+_318 |
| pORF_+_967589  | b0915 | lpxK |   | RTS_R4+_318 |
| pORF_+_969896  | b0917 | ycaR | U | RTS_R4+_319 |
| pORF_+_970075  | b0918 | kdsB |   | RTS_R4+_319 |
| pORF_+_970975  | b0919 | ycbJ | U | RTS_R4+_320 |
| pORF_+_972748  | b0921 | smtA | U | RTS_R4+_321 |
| pORF_+_973542  | b0922 | mukF |   | RTS_R4+_321 |
| pORF_+_974818  | b0923 | mukE |   | RTS_R4+_321 |
| pORF_+_975549  | b0924 | mukB | U | RTS_R4+_321 |
| pORF_+_980270  | b0925 | ycbB | U | RTS_R4+_322 |
| pORF_+_982873  | b0927 | ycbL | U | RTS_R4+_324 |
| pORF_+_989845  | b0932 | pepN |   | RTS_R4+_327 |
| pORF_+_1003964 | b0945 | pyrD |   | RTS_R4+_328 |

|               |       |      |   |             |
|---------------|-------|------|---|-------------|
| pORF+_1005139 | b0946 | ycbW | U | RTS_R4+_329 |
| pORF+_1007067 | b0948 | rlmL | U | RTS_R4+_330 |
| pORF+_1009187 | b0949 | uup  | U | RTS_R4+_330 |
| pORF+_1012422 | b0951 | pqiB |   | RTS_R4+_331 |
| pORF+_1014119 | b0952 | ymbA | U | RTS_R4+_331 |
| pORF+_1014938 | b0953 | rmf  |   | RTS_R4+_332 |
| pORF+_1017708 | b0956 | ycbG | U | RTS_R4+_333 |
| pORF+_1023601 | b0962 | helD |   | RTS_R4+_336 |
| pORF+_1027088 | b0965 | yccU | U | RTS_R4+_337 |
| pORF+_1029074 | b0968 | yccX | U | RTS_R4+_338 |
| pORF+_1031335 | b0972 | hyaA |   | RTS_R4+_340 |
| pORF+_1032477 | b0973 | hyaB |   | RTS_R4+_340 |
| pORF+_1036957 | b0978 | appC |   | RTS_R4+_341 |
| pORF+_1039810 | b0980 | appA |   | RTS_R4+_342 |
| pORF+_1050684 | b0990 | cspG |   |             |
| pORF+_1051290 | b4517 | gnsA | U | RTS_R4+_344 |
| pORF+_1057259 | b0996 | torC |   | RTS_R4+_346 |
| pORF+_1058479 | b0997 | torA |   | RTS_R4+_346 |
| pORF+_1064784 | b1002 | agp  |   | RTS_R4+_348 |
| pORF+_1073438 | b1013 | rutR | U | RTS_R4+_350 |
| pORF+_1078528 | b1015 | putP |   | RTS_R4+_351 |
| pORF+_1081466 | b1018 | efeO | U | RTS_R4+_352 |
| pORF+_1082599 | b1019 | efeB | U | RTS_R4+_352 |
| pORF+_1084215 | b1020 | phoH | U | RTS_R4+_353 |
| pORF+_1094710 | b1028 | ymdE | U |             |
| pORF+_1097070 | b1033 | ghrA |   | RTS_R4+_356 |
| pORF+_1098102 | b1034 | ycdX | U | RTS_R4+_357 |
| pORF+_1098863 | b1035 | ycdY | U | RTS_R4+_357 |
| pORF+_1105043 | b1045 | ymdB | U | RTS_R4+_360 |
| pORF+_1105509 | b1046 | ymdC | U | RTS_R4+_360 |
| pORF+_1108540 | b1048 | mdoG |   | RTS_R4+_361 |
| pORF+_1110056 | b1049 | mdoH |   | RTS_R4+_361 |
| pORF+_1115976 | b1055 | yceA | U | RTS_R4+_362 |
| pORF+_1124785 | b1066 | rimJ |   | RTS_R4+_363 |
| pORF+_1125380 | b1067 | yceH | U | RTS_R4+_363 |
| pORF+_1125996 | b1068 | yceM | U | RTS_R4+_363 |
| pORF+_1127023 | b1069 | yceN | U | RTS_R4+_364 |
| pORF+_1131797 | b1076 | flgE |   |             |
| pORF+_1133025 | b1077 | flgF |   |             |
| pORF+_1134772 | b1079 | flgH |   |             |
| pORF+_1135494 | b1080 | flgI | U |             |
| pORF+_1137601 | b1082 | flgK |   | RTS_R4+_365 |
| pORF+_1139256 | b1083 | flgL |   | RTS_R4+_365 |
| pORF+_1144163 | b1086 | rluC |   | RTS_R4+_366 |
| pORF+_1146017 | b1088 | yceD | U | RTS_R4+_368 |
| pORF+_1146590 | b1089 | rpmF |   | RTS_R4+_369 |
| pORF+_1146844 | b1090 | plsX |   | RTS_R4+_370 |
| pORF+_1147982 | b1091 | fabH |   | RTS_R4+_371 |
| pORF+_1148951 | b1092 | fabD |   | RTS_R4+_371 |
| pORF+_1149893 | b1093 | fabG |   | RTS_R4+_371 |
| pORF+_1150838 | b1094 | acpP |   | RTS_R4+_372 |
| pORF+_1151162 | b1095 | fabF |   | RTS_R4+_373 |
| pORF+_1153335 | b1097 | yceG | U | RTS_R4+_374 |
| pORF+_1154347 | b1098 | tmk  |   | RTS_R4+_375 |
| pORF+_1154985 | b1099 | holB |   | RTS_R4+_375 |
| pORF+_1155940 | b1100 | ycfH | U | RTS_R4+_375 |
| pORF+_1157092 | b1101 | ptsG |   | RTS_R4+_376 |
| pORF+_1161090 | b1103 | hinT |   | RTS_R4+_377 |
| pORF+_1161470 | b1104 | ycfL | U | RTS_R4+_377 |
| pORF+_1161858 | b1105 | ycfM | U | RTS_R4+_377 |
| pORF+_1163318 | b1107 | nagZ |   | RTS_R4+_378 |
| pORF+_1164309 | b1108 | ycfP | U | RTS_R4+_379 |
| pORF+_1165281 | b1109 | ndh  |   | RTS_R4+_380 |

|               |       |      |   |             |
|---------------|-------|------|---|-------------|
| pORF+_1168296 | b1112 | bhsA | U | RTS_R4+_382 |
| pORF+_1175701 | b1117 | lolD |   | RTS_R4+_383 |
| pORF+_1176543 | b1118 | lolE |   | RTS_R4+_383 |
| pORF+_1177756 | b1119 | nagK |   | RTS_R4+_384 |
| pORF+_1178743 | b1120 | cobB |   | RTS_R4+_384 |
| pORF+_1185025 | b1127 | pepT |   | RTS_R4+_385 |
| pORF+_1194346 | b1136 | icd  |   | RTS_R4+_386 |
| pORF+_1205315 | b1152 | ymfP | U |             |
| pORF+_1206136 | b1153 | ymfQ | U |             |
| pORF+_1210636 | b4519 | icdC | U | RTS_R4+_389 |
| pORF+_1215291 | b1165 | ymgA | U | RTS_R4+_390 |
| pORF+_1215592 | b1166 | ariR | U | RTS_R4+_390 |
| pORF+_1225823 | b1177 | ycgJ | U | RTS_R4+_395 |
| pORF+_1226904 | b1179 | ycgL | U | RTS_R4+_396 |
| pORF+_1227302 | b1180 | ycgM | U | RTS_R4+_396 |
| pORF+_1230409 | b1184 | umuC |   | RTS_R4+_398 |
| pORF+_1234137 | b1187 | fadR |   | RTS_R4+_399 |
| pORF+_1236788 | b1189 | dadA |   | RTS_R4+_400 |
| pORF+_1238102 | b1190 | dadX |   | RTS_R4+_400 |
| pORF+_1242289 | b1193 | emtA |   | RTS_R4+_402 |
| pORF+_1250280 | b1201 | dhaR | U | RTS_R4+_405 |
| pORF+_1258014 | b1205 | ychH | U | RTS_R4+_406 |
| pORF+_1262739 | b1210 | hemA |   | RTS_R4+_407 |
| pORF+_1264235 | b1211 | prfA |   | RTS_R4+_407 |
| pORF+_1265317 | b1212 | prmC |   | RTS_R4+_407 |
| pORF+_1267388 | b1215 | kdsA |   | RTS_R4+_409 |
| pORF+_1271342 | b1217 | chaB | U | RTS_R4+_410 |
| pORF+_1279087 | b1224 | narG |   | RTS_R4+_414 |
| pORF+_1282139 |       |      |   | RTS_R4+_414 |
| pORF+_1282827 | b1225 | narH |   | RTS_R4+_414 |
| pORF+_1284362 | b1226 | narJ |   | RTS_R4+_414 |
| pORF+_1288429 | b1234 | rssA | U | RTS_R4+_415 |
| pORF+_1289465 | b1235 | rssB |   | RTS_R4+_416 |
| pORF+_1290680 | b1236 | galU |   | RTS_R4+_417 |
| pORF+_1292750 | b1238 | tdk  |   | RTS_R4+_418 |
| pORF+_1299134 | b1243 | oppA |   | RTS_R4+_421 |
| pORF+_1300923 | b1244 | oppB |   | RTS_R4+_422 |
| pORF+_1302778 | b1246 | oppD |   | RTS_R4+_422 |
| pORF+_1303788 | b1247 | oppF |   | RTS_R4+_422 |
| pORF+_1309062 | b1252 | tonB |   | RTS_R4+_424 |
| pORF+_1312044 | b1256 | ompW |   | RTS_R4+_425 |
| pORF+_1322086 | b1267 | yciO | U | RTS_R4+_427 |
| pORF+_1324876 | b1269 | rluB |   | RTS_R4+_430 |
| pORF+_1327356 | b1272 | sohB | U | RTS_R4+_431 |
| pORF+_1329030 | b1274 | topA |   | RTS_R4+_432 |
| pORF+_1331879 | b1275 | cysB |   | RTS_R4+_433 |
| pORF+_1333855 | b1276 | acnA |   | RTS_R4+_435 |
| pORF+_1338267 | b1279 | yciS | U | RTS_R4+_437 |
| pORF+_1338582 | b1280 | yciM | U | RTS_R4+_437 |
| pORF+_1339885 | b1281 | pyrF |   | RTS_R4+_438 |
| pORF+_1340679 | b1282 | yciH | U | RTS_R4+_438 |
| pORF+_1359132 | b1298 | puuD |   | RTS_R4+_439 |
| pORF+_1359935 | b1299 | puuR |   | RTS_R4+_439 |
| pORF+_1360671 | b1300 | puuC |   | RTS_R4+_439 |
| pORF+_1362256 | b1301 | puuB |   | RTS_R4+_439 |
| pORF+_1363574 | b1302 | puuE |   | RTS_R4+_439 |
| pORF+_1366103 | b1304 | pspA |   | RTS_R4+_440 |
| pORF+_1366825 | b1305 | pspB |   | RTS_R4+_440 |
| pORF+_1367713 | b1308 | pspE |   | RTS_R4+_441 |
| pORF+_1368213 | b1309 | ycjM | U | RTS_R4+_442 |
| pORF+_1369933 | b1310 | ycjN | U | RTS_R4+_442 |
| pORF+_1374856 | b1315 | ycjS | U | RTS_R4+_442 |
| pORF+_1382141 | b1321 | ycjX | U | RTS_R4+_443 |

|               |       |      |   |             |
|---------------|-------|------|---|-------------|
| pORF+_1383535 | b1322 | ycjF | U | RTS_R4+_443 |
| pORF+_1384717 | b1323 | tyrR |   | RTS_R4+_444 |
| pORF+_1386912 | b1325 | ycjG |   | RTS_R4+_445 |
| pORF+_1391230 | b1329 | mppA |   | RTS_R4+_447 |
| pORF+_1394100 | b1331 | insH |   | RTS_R4+_448 |
| pORF+_1404003 | b1340 | ydaL | U | RTS_R4+_451 |
| pORF+_1406074 | b1342 | ydaN | U | RTS_R4+_452 |
| pORF+_1423838 |       |      |   |             |
| pORF+_1425482 | b4570 | lomR | U |             |
| pORF+_1427067 | b1372 | stfR | U | RTS_R4+_457 |
| pORF+_1445540 | b1385 | feaB |   | RTS_R4+_465 |
| pORF+_1456982 | b1395 | paaH |   |             |
| pORF+_1458917 | b1397 | paaJ | U | RTS_R4+_466 |
| pORF+_1461563 | b1399 | paaX |   | RTS_R4+_468 |
| pORF+_1462495 | b1400 | paaY | U | RTS_R4+_468 |
| pORF+_1463416 | b4492 | ydbA | U | RTS_R4+_469 |
| pORF+_1472245 | b1406 | ydbC | U | RTS_R4+_473 |
| pORF+_1473162 | b1407 | ydbD | U |             |
| pORF+_1481085 | b1413 | hrpA |   | RTS_R4+_474 |
| pORF+_1485259 | b1414 | ydcF | U | RTS_R4+_475 |
| pORF+_1486256 | b1415 | aldA |   | RTS_R4+_476 |
| pORF+_1490494 | b1421 | trg  |   | RTS_R4+_479 |
| pORF+_1493312 | b1423 | ydcJ | U | RTS_R4+_480 |
| pORF+_1494880 | b1424 | mdoD |   | RTS_R4+_481 |
| pORF+_1496947 | b1427 | rimL |   | RTS_R4+_483 |
| pORF+_1499586 | b1430 | tehB | U | RTS_R4+_484 |
| pORF+_1500481 | b1431 | ydcL | U | RTS_R4+_485 |
| pORF+_1504763 | b1435 | ydcP | U | RTS_R4+_488 |
| pORF+_1509678 | b1440 | ydcS | U | RTS_R4+_491 |
| pORF+_1510841 | b1441 | ydcT | U | RTS_R4+_491 |
| pORF+_1513602 | b1444 | ydcW |   | RTS_R4+_492 |
| pORF+_1515672 | b1446 | ydcY | U | RTS_R4+_494 |
| pORF+_1516958 | b1449 | yncB | U | RTS_R4+_495 |
| pORF+_1518229 | b1450 | yncC | U | RTS_R4+_496 |
| pORF+_1521331 | b1452 | yncE | U | RTS_R4+_497 |
| pORF+_1524964 | b1455 | yncH | U |             |
| pORF+_1531037 | b1461 | pptA |   | RTS_R4+_501 |
| pORF+_1545425 |       |      |   | RTS_R4+_503 |
| pORF+_1546061 | b1474 | fdnG |   | RTS_R4+_503 |
| pORF+_1548485 | b1475 | fdnH |   |             |
| pORF+_1554649 | b1482 | osmC |   | RTS_R4+_504 |
| pORF+_1599514 | b1513 | lsrA |   |             |
| pORF+_1602071 | b1515 | lsrD |   | RTS_R4+_506 |
| pORF+_1603075 | b1516 | lsrB |   | RTS_R4+_506 |
| pORF+_1604124 | b1517 | lsrF |   | RTS_R4+_507 |
| pORF+_1605023 | b1518 | lsrG |   | RTS_R4+_507 |
| pORF+_1605370 | b1519 | tam  |   | RTS_R4+_508 |
| pORF+_1625526 | b1539 | ydfG |   | RTS_R4+_516 |
| pORF+_1626376 | b1540 | ydfH | U | RTS_R4+_517 |
| pORF+_1627239 | b1541 | ydfZ | U | RTS_R4+_518 |
| pORF+_1631646 | b1545 | pinQ | U |             |
| pORF+_1639879 | b1558 | cspF |   |             |
| pORF+_1645958 | b1570 | dicA | U | RTS_R4+_524 |
| pORF+_1653832 | b1583 | ynfB | U | RTS_R4+_528 |
| pORF+_1654208 | b1584 | speG |   | RTS_R4+_528 |
| pORF+_1655547 | b1586 | ynfD | U | RTS_R4+_529 |
| pORF+_1656093 | b1587 | ynfE |   | RTS_R4+_530 |
| pORF+_1658577 | b1588 | ynfF |   | RTS_R4+_531 |
| pORF+_1661014 | b1589 | ynfG |   | RTS_R4+_532 |
| pORF+_1662521 | b1591 | dmsD |   | RTS_R4+_533 |
| pORF+_1669373 | b1597 | asr  |   | RTS_R4+_536 |
| pORF+_1669984 | b1598 | ydgD | U | RTS_R4+_537 |
| pORF+_1676451 | b1604 | ydgH | U | RTS_R4+_539 |



|               |       |      |   |             |
|---------------|-------|------|---|-------------|
| pORF+_1680123 | b1608 | rstA |   | RTS_R4+_541 |
| pORF+_1680906 | b1609 | rstB |   | RTS_R4+_541 |
| pORF+_1682271 | b1610 | tus  |   | RTS_R4+_542 |
| pORF+_1686522 | b1613 | manA |   | RTS_R4+_543 |
| pORF+_1687876 | b1614 | ydgA | U | RTS_R4+_544 |
| pORF+_1697016 | b1621 | malX |   | RTS_R4+_545 |
| pORF+_1698981 | b1622 | malY |   | RTS_R4+_546 |
| pORF+_1700257 | b1623 | add  |   | RTS_R4+_547 |
| pORF+_1704943 | b1629 | rsxC | U | RTS_R4+_552 |
| pORF+_1707166 | b1630 | rsxD | U | RTS_R4+_552 |
| pORF+_1708228 | b1631 | rsxG | U | RTS_R4+_552 |
| pORF+_1709547 | b1633 | nth  |   | RTS_R4+_552 |
| pORF+_1710793 | b1634 | tppB | U | RTS_R4+_553 |
| pORF+_1712401 | b1635 | gst  |   | RTS_R4+_554 |
| pORF+_1717900 | b1641 | slyB |   | RTS_R4+_555 |
| pORF+_1720145 | b1645 | ydhK | U | RTS_R4+_556 |
| pORF+_1724683 | b1650 | nemA |   | RTS_R4+_557 |
| pORF+_1725861 | b1651 | gloA |   | RTS_R4+_558 |
| pORF+_1726371 | b1652 | rnt  |   | RTS_R4+_559 |
| pORF+_1733402 | b1656 | sodB |   | RTS_R4+_561 |
| pORF+_1735868 | b1658 | purR |   | RTS_R4+_562 |
| pORF+_1739437 | b1661 | cfa  |   | RTS_R4+_564 |
| pORF+_1741481 | b1663 | mdtK |   | RTS_R4+_565 |
| pORF+_1744724 | b1667 | ydhR | U | RTS_R4+_567 |
| pORF+_1745155 | b1668 | ydhS | U | RTS_R4+_568 |
| pORF+_1753506 | b1676 | pykF |   | RTS_R4+_569 |
| pORF+_1755445 | b1677 | lpp  |   | RTS_R4+_570 |
| pORF+_1767098 | b1688 | ydiK | U | RTS_R4+_571 |
| pORF+_1771813 | b1692 | ydiB |   | RTS_R4+_573 |
| pORF+_1772710 | b1693 | aroD |   | RTS_R4+_573 |
| pORF+_1785469 | b1703 | ydiA | U | RTS_R4+_575 |
| pORF+_1786336 | b1704 | aroH |   | RTS_R4+_576 |
| pORF+_1804391 | b1723 | pfkB |   | RTS_R4+_580 |
| pORF+_1805424 | b1724 | ydiZ | U | RTS_R4+_581 |
| pORF+_1805820 | b1725 | yniA | U | RTS_R4+_582 |
| pORF+_1807404 | b1727 | yniC | U | RTS_R4+_583 |
| pORF+_1808958 | b1729 | ydjN | U | RTS_R4+_585 |
| pORF+_1811891 | b1732 | katE |   | RTS_R4+_586 |
| pORF+_1820482 | b1740 | nadE |   | RTS_R4+_587 |
| pORF+_1830440 | b1749 | xthA |   | RTS_R4+_589 |
| pORF+_1831978 | b1751 | ydjY | U | RTS_R4+_591 |
| pORF+_1833539 | b1753 | ynjA | U | RTS_R4+_592 |
| pORF+_1834094 | b1754 | ynjB | U | RTS_R4+_592 |
| pORF+_1837476 | b1757 | ynjE | U | RTS_R4+_592 |
| pORF+_1840395 | b1761 | gdhA |   | RTS_R4+_594 |
| pORF+_1846717 | b1766 | sppA |   | RTS_R4+_595 |
| pORF+_1848884 | b1767 | ansA |   | RTS_R4+_596 |
| pORF+_1849893 | b1768 | pncA |   | RTS_R4+_596 |
| pORF+_1860786 | b1779 | gapA |   | RTS_R4+_598 |
| pORF+_1861853 | b1780 | yeaD | U | RTS_R4+_599 |
| pORF+_1864932 | b1783 | yeaG | U | RTS_R4+_600 |
| pORF+_1866979 | b1784 | yeaH | U | RTS_R4+_600 |
| pORF+_1871598 | b1787 | yeaK | U | RTS_R4+_603 |
| pORF+_1874912 | b1792 | yeaO | U | RTS_R4+_605 |
| pORF+_1875610 | b1794 | yeaP | U | RTS_R4+_606 |
| pORF+_1879936 | b1800 | yeaU | U | RTS_R4+_607 |
| pORF+_1891343 | b1809 | yoaB | U | RTS_R4+_608 |
| pORF+_1892097 | b1810 | yoaC | U | RTS_R4+_609 |
| pORF+_1892829 | b1812 | pabB |   | RTS_R4+_610 |
| pORF+_1894194 | b1813 | nudL | U | RTS_R4+_610 |
| pORF+_1894956 | b1814 | sdaA |   | RTS_R4+_611 |
| pORF+_1900072 | b1817 | manX |   | RTS_R4+_613 |
| pORF+_1901106 | b1818 | manY |   | RTS_R4+_614 |

|               |       |      |   |             |
|---------------|-------|------|---|-------------|
| pORF+_1901910 | b1819 | manZ |   | RTS_R4+_614 |
| pORF+_1906949 | b4536 | yobH | U | RTS_R4+_618 |
| pORF+_1914282 | b1833 | yebS | U | RTS_R4+_619 |
| pORF+_1915492 | b1834 | yebT | U | RTS_R4+_620 |
| pORF+_1918241 | b1835 | rsmF | U | RTS_R4+_621 |
| pORF+_1919789 | b1836 | yebV | U | RTS_R4+_622 |
| pORF+_1923045 | b1842 | holE |   | RTS_R4+_625 |
| pORF+_1928905 | b1849 | purT |   | RTS_R4+_628 |
| pORF+_1934676 | b1853 | yebK | U | RTS_R4+_629 |
| pORF+_1935532 | b1854 | pykA |   | RTS_R4+_630 |
| pORF+_1940686 | b1858 | znuC |   | RTS_R4+_631 |
| pORF+_1941438 | b1859 | znuB |   | RTS_R4+_631 |
| pORF+_1948823 | b1867 | yecD | U | RTS_R4+_632 |
| pORF+_1949419 | b1868 | yecE | U | RTS_R4+_632 |
| pORF+_1950131 | b1869 | yecN | U | RTS_R4+_633 |
| pORF+_1950726 | b1870 | cmoA | U | RTS_R4+_633 |
| pORF+_1951466 | b1871 | cmoB | U | RTS_R4+_633 |
| pORF+_1958086 | b1876 | argS |   | RTS_R4+_635 |
| pORF+_1977777 | b1895 | uspC |   | RTS_R4+_637 |
| pORF+_1986725 | b1905 | ftnA |   | RTS_R4+_640 |
| pORF+_1993842 | b1915 | yecF | U | RTS_R4+_642 |
| pORF+_2004180 | b1927 | amyA |   | RTS_R4+_645 |
| pORF+_2007503 | b1930 | yedF | U | RTS_R4+_646 |
| pORF+_2011253 | b1938 | fliF |   | RTS_R4+_649 |
| pORF+_2012904 | b1939 | fliG |   | RTS_R4+_649 |
| pORF+_2013871 | b1940 | fliH |   | RTS_R4+_649 |
| pORF+_2014578 | b1941 | fliI |   | RTS_R4+_649 |
| pORF+_2017642 | b1944 | fliL |   | RTS_R4+_650 |
| pORF+_2019112 | b1946 | fliN |   |             |
| pORF+_2021992 | b1951 | rcsA |   |             |
| pORF+_2022995 | b1953 | yodD | U | RTS_R4+_651 |
| pORF+_2023535 | b1955 | yedP | U | RTS_R4+_652 |
| pORF+_2032045 | b4496 | yedS | U | RTS_R4+_653 |
| pORF+_2032863 | b4496 | yedS | U | RTS_R4+_653 |
| pORF+_2033859 | b1967 | hchA |   | RTS_R4+_654 |
| pORF+_2036980 | b1970 | yedX | U | RTS_R4+_655 |
| pORF+_2037502 | b1971 | yedY | U | RTS_R4+_656 |
| pORF+_2039399 | b1973 | yodA | U | RTS_R4+_657 |
| pORF+_2041636 | b1976 | mtfA | U | RTS_R4+_659 |
| pORF+_2042887 | b1978 | yeeJ |   | RTS_R4+_661 |
| pORF+_2051667 | b1981 | shiA |   | RTS_R4+_662 |
| pORF+_2052929 | b1982 | amn  |   | RTS_R4+_663 |
| pORF+_2054882 | b1983 | yeeN | U | RTS_R4+_664 |
| pORF+_2068268 | b4582 | yoeA | U | RTS_R4+_669 |
| pORF+_2069407 | b2000 | flu  |   | RTS_R4+_672 |
| pORF+_2080708 | b2011 | sbcB |   | RTS_R4+_674 |
| pORF+_2088177 | b2019 | hisG |   | RTS_R4+_676 |
| pORF+_2089112 | b2020 | hisD |   | RTS_R4+_676 |
| pORF+_2090422 | b2021 | hisC |   | RTS_R4+_676 |
| pORF+_2091489 | b2022 | hisB |   | RTS_R4+_676 |
| pORF+_2092559 | b2023 | hisH |   | RTS_R4+_676 |
| pORF+_2093146 | b2024 | hisA |   | RTS_R4+_676 |
| pORF+_2093868 | b2025 | hisF |   | RTS_R4+_676 |
| pORF+_2094638 | b2026 | hisI |   | RTS_R4+_677 |
| pORF+_2135860 | b2063 | yegH | U | RTS_R4+_678 |
| pORF+_2145635 | b2069 | yegD | U | RTS_R4+_681 |
| pORF+_2151893 | b2074 | mdtA |   | RTS_R4+_684 |
| pORF+_2153287 | b2075 | mdtB |   | RTS_R4+_684 |
| pORF+_2160900 | b2078 | baeS |   | RTS_R4+_685 |
| pORF+_2162300 | b2079 | baeR |   | RTS_R4+_686 |
| pORF+_2163174 | b2080 | yegP | U | RTS_R4+_687 |
| pORF+_2163692 | b2081 | yegQ | U | RTS_R4+_688 |
| pORF+_2166736 | b2086 | yegS |   | RTS_R4+_690 |

|               |       |      |   |             |
|---------------|-------|------|---|-------------|
| pORF+_2168251 | b2088 | insE |   | RTS_R4+_691 |
| pORF+_2168556 | b2089 | insF |   | RTS_R4+_691 |
| pORF+_2178117 | b2099 | yegU | U |             |
| pORF+_2184802 | b2107 | yohN | U | RTS_R4+_693 |
| pORF+_2192313 | b2114 | metG |   | RTS_R4+_694 |
| pORF+_2198301 | b2118 | yehI | U |             |
| pORF+_2203576 | b2120 | yehM | U |             |
| pORF+_2207098 | b2122 | yehQ | U |             |
| pORF+_2220174 | b2133 | dld  |   | RTS_R4+_698 |
| pORF+_2229866 | b2143 | cdd  |   | RTS_R4+_702 |
| pORF+_2230900 | b2144 | sanA | U | RTS_R4+_703 |
| pORF+_2232055 | b2146 | yeiT | U | RTS_R4+_704 |
| pORF+_2241932 | b2154 | yeiG | U | RTS_R4+_705 |
| pORF+_2248862 | b2159 | nfo  |   | RTS_R4+_707 |
| pORF+_2263217 | b2171 | yeiP | U | RTS_R4+_709 |
| pORF+_2265851 | b2173 | yeiR | U | RTS_R4+_711 |
| pORF+_2268001 | b2175 | spr  | U | RTS_R4+_712 |
| pORF+_2270380 | b2177 | yejA | U | RTS_R4+_714 |
| pORF+_2272201 | b2178 | yejB | U |             |
| pORF+_2274274 | b2180 | yejF | U | RTS_R4+_716 |
| pORF+_2278654 | b2184 | yejH | U | RTS_R4+_718 |
| pORF+_2280443 | b2185 | rplY |   | RTS_R4+_719 |
| pORF+_2282151 | b2187 | yejL | U | RTS_R4+_720 |
| pORF+_2282398 | b2188 | yejM | U | RTS_R4+_720 |
| pORF+_2288492 | b2193 | narP |   | RTS_R4+_722 |
| pORF+_2301906 | b2209 | eco  |   | RTS_R4+_724 |
| pORF+_2311510 | b2216 | rcsD |   | RTS_R4+_727 |
| pORF+_2314154 | b2217 | rcsB |   | RTS_R4+_728 |
| pORF+_2319888 | b2220 | atoC |   | RTS_R4+_729 |
| pORF+_2322778 | b2223 | atoE |   |             |
| pORF+_2324131 | b2224 | atoB |   |             |
| pORF+_2337541 | b2232 | ubiG |   | RTS_R4+_730 |
| pORF+_2342887 | b2234 | nrdA |   | RTS_R4+_732 |
| pORF+_2345175 | b2235 | nrdB |   | RTS_R4+_733 |
| pORF+_2350669 | b2241 | glpA |   | RTS_R4+_735 |
| pORF+_2352059 | b2242 | glpB |   | RTS_R4+_735 |
| pORF+_2363917 | b2253 | arnB |   | RTS_R4+_738 |
| pORF+_2368930 | b2257 | arnT |   | RTS_R4+_739 |
| pORF+_2370632 | b2258 | arnF | U | RTS_R4+_740 |
| pORF+_2379612 | b2268 | rbn  |   | RTS_R4+_741 |
| pORF+_2380735 | b2269 | elaD | U |             |
| pORF+_2405583 | b2290 | yfbQ | U | RTS_R4+_743 |
| pORF+_2406884 | b2291 | yfbR |   | RTS_R4+_744 |
| pORF+_2411492 | b2296 | ackA |   | RTS_R4+_745 |
| pORF+_2412769 | b2297 | pta  |   | RTS_R4+_746 |
| pORF+_2418643 | b2302 | yfcG | U | RTS_R4+_748 |
| pORF+_2419347 | b2303 | folX |   | RTS_R4+_749 |
| pORF+_2419730 | b2304 | yfcH | U | RTS_R4+_750 |
| pORF+_2439726 | b2324 | mnmC |   | RTS_R4+_752 |
| pORF+_2446628 | b2331 | yfcN | U | RTS_R4+_753 |
| pORF+_2459322 | b2344 | fadL |   | RTS_R4+_754 |
| pORF+_2461034 | b2345 | yfdF | U |             |
| pORF+_2463323 | b2347 | yfdC | U | RTS_R4+_755 |
| pORF+_2464531 | b2349 | intS | U | RTS_R4+_757 |
| pORF+_2466236 | b2351 | yfdH |   | RTS_R4+_758 |
| pORF+_2467153 | b2352 | yfdI | U | RTS_R4+_759 |
| pORF+_2472054 | b2360 | yfdQ | U |             |
| pORF+_2477224 | b2366 | dsdA |   | RTS_R4+_762 |
| pORF+_2481777 | b2369 | evgA |   | RTS_R4+_763 |
| pORF+_2482396 | b2370 | evgS |   | RTS_R4+_763 |
| pORF+_2498387 | b2381 | ypdB | U | RTS_R4+_767 |
| pORF+_2511025 | b2393 | nupC |   | RTS_R4+_771 |
| pORF+_2512347 | b2394 | insL |   | RTS_R4+_772 |

|                |       |      |   |             |
|----------------|-------|------|---|-------------|
| pORF_+_2516474 | b2398 | yfeC | U | RTS_R4+_773 |
| pORF_+_2524968 | b2410 | yfeH | U | RTS_R4+_776 |
| pORF_+_2529485 | b2413 | cysZ | U | RTS_R4+_777 |
| pORF_+_2530431 | b2414 | cysK |   | RTS_R4+_778 |
| pORF_+_2531786 | b2415 | ptsH |   | RTS_R4+_779 |
| pORF_+_2532088 | b2416 | ptsI |   | RTS_R4+_779 |
| pORF_+_2533856 | b2417 | crr  |   | RTS_R4+_780 |
| pORF_+_2543795 | b2428 | murQ | U | RTS_R4+_784 |
| pORF_+_2550374 | b2435 | amiA |   | RTS_R4+_786 |
| pORF_+_2551247 | b2436 | hemF |   | RTS_R4+_786 |
| pORF_+_2556793 | b2442 | intZ | U | RTS_R4+_788 |
| pORF_+_2561984 | b2449 | yffR | U | RTS_R4+_792 |
| pORF_+_2562395 | b2450 | yffS | U | RTS_R4+_793 |
| pORF_+_2576688 | b2464 | talA |   | RTS_R4+_795 |
| pORF_+_2577595 | b2465 | tktB |   | RTS_R4+_795 |
| pORF_+_2585617 | b2470 | acrD |   | RTS_R4+_797 |
| pORF_+_2589269 | b2471 | yffB | U | RTS_R4+_798 |
| pORF_+_2589629 | b2472 | dapE |   | RTS_R4+_799 |
| pORF_+_2597862 | b2479 | gcvR |   | RTS_R4+_802 |
| pORF_+_2598500 | b2480 | bcp  |   | RTS_R4+_803 |
| pORF_+_2604373 |       |      |   |             |
| pORF_+_2614116 | b2494 | yfgC | U | RTS_R4+_804 |
| pORF_+_2615600 | b2495 | yfgD | U | RTS_R4+_804 |
| pORF_+_2619204 | b2499 | purM |   | RTS_R4+_805 |
| pORF_+_2620256 | b2500 | purN |   | RTS_R4+_805 |
| pORF_+_2621060 | b2501 | ppk  |   | RTS_R4+_806 |
| pORF_+_2623098 | b2502 | ppx  |   | RTS_R4+_806 |
| pORF_+_2632254 | b2509 | xseA |   | RTS_R4+_810 |
| pORF_+_2650357 | b2521 | sseA |   | RTS_R4+_811 |
| pORF_+_2661464 | b2533 | suhB |   | RTS_R4+_813 |
| pORF_+_2663436 | b2535 | csiE | U | RTS_R4+_814 |
| pORF_+_2670069 | b2542 | hcaD |   | RTS_R4+_816 |
| pORF_+_2682237 |       |      |   | RTS_R4+_819 |
| pORF_+_2683836 | b2552 | hmp  |   | RTS_R4+_820 |
| pORF_+_2693823 | b2558 | yfhD | U | RTS_R4+_821 |
| pORF_+_2696709 | b2561 | yfhH | U | RTS_R4+_822 |
| pORF_+_2708442 | b2574 | nadB |   | RTS_R4+_824 |
| pORF_+_2710918 | b2576 | srmB |   | RTS_R4+_825 |
| pORF_+_2714776 | b2580 | ung  |   | RTS_R4+_826 |
| pORF_+_2716757 | b2582 | trxC |   | RTS_R4+_827 |
| pORF_+_2717975 | b2584 | yfiQ | U | RTS_R4+_828 |
| pORF_+_2720746 | b2585 | pssA |   | RTS_R4+_830 |
| pORF_+_2734168 | b2595 | bamD | U | RTS_R4+_832 |
| pORF_+_2735176 | b2597 | raiA |   | RTS_R4+_833 |
| pORF_+_2735767 | b2599 | pheA |   | RTS_R4+_834 |
| pORF_+_2740405 | b2604 | yfiN | U | RTS_R4+_836 |
| pORF_+_2741647 | b2605 | yfiB | U | RTS_R4+_836 |
| pORF_+_2745909 | b2611 | ypjD | U | RTS_R4+_837 |
| pORF_+_2746820 | b4461 | yfjD | U | RTS_R4+_837 |
| pORF_+_2748853 | b2615 | nadK |   | RTS_R4+_838 |
| pORF_+_2751627 | b2617 | smpA |   | RTS_R4+_840 |
| pORF_+_2752918 | b2620 | smpB |   | RTS_R4+_841 |
| pORF_+_2757007 | b2625 | yfiI | U |             |
| pORF_+_2765726 | b2632 | yfjP | U | RTS_R4+_848 |
| pORF_+_2787938 | b2660 | ygaF | U | RTS_R4+_854 |
| pORF_+_2789295 | b2661 | gabD |   | RTS_R4+_855 |
| pORF_+_2790751 | b2662 | gabT |   | RTS_R4+_855 |
| pORF_+_2795542 | b2668 | ygaP | U | RTS_R4+_857 |
| pORF_+_2798156 | b2672 | ygaM | U | RTS_R4+_859 |
| pORF_+_2798745 | b2673 | nrdH |   | RTS_R4+_860 |
| pORF_+_2799370 | b2675 | nrdE |   | RTS_R4+_860 |
| pORF_+_2802564 | b2677 | proV |   | RTS_R4+_861 |
| pORF_+_2805112 | b2679 | proX |   | RTS_R4+_861 |

|               |       |      |   |             |
|---------------|-------|------|---|-------------|
| pORF+_2808792 | b2684 | mprA |   | RTS_R4+_863 |
| pORF+_2809437 | b2685 | emrA |   | RTS_R4+_863 |
| pORF+_2823854 | b2702 | srlA |   | RTS_R4+_866 |
| pORF+_2827069 | b2707 | srlR |   | RTS_R4+_867 |
| pORF+_2827835 | b2708 | gutQ | U | RTS_R4+_868 |
| pORF+_2849023 | b2727 | hypB |   | RTS_R4+_872 |
| pORF+_2849859 | b2728 | hypC |   | RTS_R4+_872 |
| pORF+_2851276 | b2730 | hypE |   | RTS_R4+_873 |
| pORF+_2852324 | b2731 | fhlA |   | RTS_R4+_874 |
| pORF+_2855115 | b2733 | mutS |   | RTS_R4+_875 |
| pORF+_2899918 | b2776 | ycgE | U |             |
| pORF+_2913079 | b2786 | barA |   | RTS_R4+_881 |
| pORF+_2923370 | b2794 | queF |   | RTS_R4+_882 |
| pORF+_2924330 | b2795 | ygdH | U | RTS_R4+_883 |
| pORF+_2926251 | b2796 | sdaC | U | RTS_R4+_884 |
| pORF+_2927598 | b2797 | sdaB |   | RTS_R4+_884 |
| pORF+_2928987 | b2798 | ygdG |   | RTS_R4+_884 |
| pORF+_2933606 | b2802 | fucI |   |             |
| pORF+_2936910 | b2804 | fucU |   | RTS_R4+_885 |
| pORF+_2937381 | b2805 | fucR |   | RTS_R4+_885 |
| pORF+_2942564 | b2811 | csdE | U | RTS_R4+_888 |
| pORF+_2947198 | b2818 | argA |   | RTS_R4+_891 |
| pORF+_2969293 | b2833 | ygdR | U | RTS_R4+_894 |
| pORF+_2969619 | b2834 | tas  | U | RTS_R4+_895 |
| pORF+_2974621 | b2837 | galR |   | RTS_R4+_896 |
| pORF+_3009483 | b2874 | yqeA | U | RTS_R4+_902 |
| pORF+_3014082 | b2878 | ygfK | U | RTS_R4+_904 |
| pORF+_3019338 | b2881 | xdhD | U | RTS_R4+_904 |
| pORF+_3029260 | b2888 | ygfU | U |             |
| pORF+_3031087 | b2889 | idi  |   | RTS_R4+_906 |
| pORF+_3037877 | b2895 | fldB |   | RTS_R4+_907 |
| pORF+_3039335 | b2898 | ygfZ | U | RTS_R4+_908 |
| pORF+_3041666 | b2901 | bglA |   | RTS_R4+_909 |
| pORF+_3053634 | b2910 | zapA |   | RTS_R4+_910 |
| pORF+_3057709 | b2916 | argP |   | RTS_R4+_913 |
| pORF+_3061009 | b2918 | argK |   |             |
| pORF+_3079716 | b2936 | yggG | U | RTS_R4+_915 |
| pORF+_3084716 | b2942 | metK |   | RTS_R4+_916 |
| pORF+_3088366 | b2945 | endA |   | RTS_R4+_917 |
| pORF+_3089129 | b2946 | rsmE | U | RTS_R4+_918 |
| pORF+_3089900 | b2947 | gshB |   | RTS_R4+_918 |
| pORF+_3090887 | b2948 | yqgE | U | RTS_R4+_919 |
| pORF+_3091396 | b2949 | yqgF | U | RTS_R4+_919 |
| pORF+_3093120 | b2951 | yggS | U | RTS_R4+_920 |
| pORF+_3094703 | b2954 | rdgB |   | RTS_R4+_921 |
| pORF+_3095289 | b2955 | yggW | U | RTS_R4+_921 |
| pORF+_3102115 | b2962 | yggX |   | RTS_R4+_925 |
| pORF+_3102452 | b2963 | mltC |   | RTS_R4+_925 |
| pORF+_3103688 | b2964 | nupG |   | RTS_R4+_926 |
| pORF+_3128200 | b2982 | insH |   | RTS_R4+_932 |
| pORF+_3136701 | b2989 | yghU | U | RTS_R4+_933 |
| pORF+_3145919 | b3001 | yghZ |   | RTS_R4+_934 |
| pORF+_3147684 | b3003 | yghA | U | RTS_R4+_935 |
| pORF+_3150123 | b3008 | metC |   | RTS_R4+_936 |
| pORF+_3151585 | b3009 | yghB | U | RTS_R4+_937 |
| pORF+_3153353 | b3011 | yqhD |   | RTS_R4+_938 |
| pORF+_3153651 |       |      |   | RTS_R4+_938 |
| pORF+_3154645 | b3012 | dkgA |   | RTS_R4+_939 |
| pORF+_3156649 | b3014 | yqhH | U |             |
| pORF+_3168506 | b3026 | qseC |   | RTS_R4+_940 |
| pORF+_3170552 | b3028 | mdaB |   | RTS_R4+_941 |
| pORF+_3171164 | b3029 | ygiN |   | RTS_R4+_942 |
| pORF+_3176098 | b3035 | tolC |   | RTS_R4+_944 |

|               |       |      |   |              |
|---------------|-------|------|---|--------------|
| pORF+_3177733 | b3037 | ygiB | U | RTS_R4+_945  |
| pORF+_3178443 | b3038 | ygiC | U | RTS_R4+_945  |
| pORF+_3180530 | b3040 | zupT |   | RTS_R4+_947  |
| pORF+_3182802 | b3042 | yqiC | U | RTS_R4+_948  |
| pORF+_3183436 | b3043 | ygiL | U |              |
| pORF+_3190230 | b3050 | yqiJ | U |              |
| pORF+_3190886 | b3051 | yqiK | U |              |
| pORF+_3199229 | b3055 | htrG | U | RTS_R4+_950  |
| pORF+_3199913 | b3056 | cca  |   | RTS_R4+_951  |
| pORF+_3208803 | b3065 | rpsU |   | RTS_R4+_953  |
| pORF+_3209129 | b3066 | dnaG |   | RTS_R4+_953  |
| pORF+_3211069 | b3067 | rpoD |   | RTS_R4+_954  |
| pORF+_3214801 | b3071 | yqjI | U | RTS_R4+_956  |
| pORF+_3217405 | b3073 | ygjG |   | RTS_R4+_957  |
| pORF+_3219488 | b3075 | ebgR |   | RTS_R4+_958  |
| pORF+_3229687 | b3081 | fadH |   | RTS_R4+_959  |
| pORF+_3235315 | b3087 | ygjR | U | RTS_R4+_961  |
| pORF+_3237966 | b3089 | sstT |   | RTS_R4+_963  |
| pORF+_3244659 | b3094 | exuR |   | RTS_R4+_965  |
| pORF+_3246976 | b3097 | yqjC | U | RTS_R4+_967  |
| pORF+_3247397 | b3098 | yqjD | U | RTS_R4+_967  |
| pORF+_3249025 | b3102 | yqjG | U | RTS_R4+_969  |
| pORF+_3253059 | b3107 | yhaL | U | RTS_R4+_972  |
| pORF+_3265846 | b3120 | yhaB | U |              |
| pORF+_3275024 | b3129 | sohA | U | RTS_R4+_975  |
| pORF+_3276936 | b3132 | kbaZ |   |              |
| pORF+_3281165 | b3137 | kbaY |   |              |
| pORF+_3283353 | b3140 | agaD |   |              |
| pORF+_3286761 | b3144 | yraJ | U |              |
| pORF+_3291392 | b3147 | yraM | U | RTS_R4+_976  |
| pORF+_3293831 | b3149 | diaA |   | RTS_R4+_977  |
| pORF+_3294431 | b3150 | yraP | U | RTS_R4+_978  |
| pORF+_3296954 | b3153 | yhbO | U | RTS_R4+_979  |
| pORF+_3301470 | b3160 | yhbW | U | RTS_R4+_982  |
| pORF+_3316659 | b3172 | argG |   | RTS_R4+_983  |
| pORF+_3325812 | b3180 | yhbY | U | RTS_R4+_984  |
| pORF+_3326985 | b3182 | dacB |   | RTS_R4+_985  |
| pORF+_3331732 | b3187 | ispB |   | RTS_R4+_986  |
| pORF+_3338297 | b3196 | yrbG | U | RTS_R4+_987  |
| pORF+_3339267 | b3197 | kdsD |   | RTS_R4+_987  |
| pORF+_3340295 | b3198 | kdsC |   | RTS_R4+_988  |
| pORF+_3340858 | b3199 | yrbK | U | RTS_R4+_988  |
| pORF+_3341381 | b3200 | lptA | U | RTS_R4+_989  |
| pORF+_3341966 | b3201 | lptB | U | RTS_R4+_989  |
| pORF+_3342739 | b3202 | rpoN |   | RTS_R4+_990  |
| pORF+_3344111 | b3203 | hpf  | U | RTS_R4+_991  |
| pORF+_3344576 | b3204 | ptsN |   | RTS_R4+_991  |
| pORF+_3345137 | b3205 | yhbJ | U | RTS_R4+_991  |
| pORF+_3345988 | b3206 | npr  |   | RTS_R4+_991  |
| pORF+_3346417 | b3207 | yrbL | U | RTS_R4+_992  |
| pORF+_3352639 | b3212 | gltB |   | RTS_R4+_996  |
| pORF+_3357220 | b3213 | gltD |   | RTS_R4+_996  |
| pORF+_3360811 | b3216 | yhcD | U | RTS_R4+_998  |
| pORF+_3364948 | b3219 | yhcF | U | RTS_R4+_999  |
| pORF+_3372873 | b3227 | dcuD | U |              |
| pORF+_3378207 | b3233 | yhcB | U | RTS_R4+_1000 |
| pORF+_3378723 | b3234 | degQ |   | RTS_R4+_1001 |
| pORF+_3380222 | b3235 | degS |   | RTS_R4+_1002 |
| pORF+_3382725 | b3237 | argR |   | RTS_R4+_1003 |
| pORF+_3383509 | b3238 | yhcN | U | RTS_R4+_1004 |
| pORF+_3387542 | b3243 | aaeR | U | RTS_R4+_1006 |
| pORF+_3401506 | b3253 | yhdH | U | RTS_R4+_1011 |
| pORF+_3403458 | b3255 | accB |   | RTS_R4+_1013 |

|               |       |      |   |              |
|---------------|-------|------|---|--------------|
| pORF+_3403900 | b3256 | accC |   | RTS_R4+_1013 |
| pORF+_3407092 | b3259 | prmA |   | RTS_R4+_1015 |
| pORF+_3408302 | b3260 | dusB |   | RTS_R4+_1016 |
| pORF+_3409293 | b3261 | fis  |   | RTS_R4+_1016 |
| pORF+_3411886 | b3265 | acrE |   |              |
| pORF+_3413055 | b3266 | acrF |   |              |
| pORF+_3416412 | b3267 | yhdV | U | RTS_R4+_1018 |
| pORF+_3420458 | b3271 | yhdZ | U | RTS_R4+_1019 |
| pORF+_3427042 | b3279 | yrdA | U | RTS_R4+_1020 |
| pORF+_3431712 | b3287 | def  |   | RTS_R4+_1021 |
| pORF+_3432236 | b3288 | fmt  |   | RTS_R4+_1021 |
| pORF+_3433208 | b3289 | rsmB |   | RTS_R4+_1021 |
| pORF+_3434540 | b3290 | trkA |   | RTS_R4+_1021 |
| pORF+_3436046 | b3291 | mscL |   | RTS_R4+_1022 |
| pORF+_3456361 | b3326 | gspE |   | RTS_R4+_1023 |
| pORF+_3475662 | b3348 | slyX | U | RTS_R4+_1024 |
| pORF+_3479311 | b3352 | yheS | U | RTS_R4+_1026 |
| pORF+_3482240 | b3354 | yheU | U | RTS_R4+_1027 |
| pORF+_3482512 | b3355 | prkB | U | RTS_R4+_1027 |
| pORF+_3484142 | b3357 | crp  |   | RTS_R4+_1028 |
| pORF+_3492033 | b3365 | nirB |   | RTS_R4+_1030 |
| pORF+_3495850 | b3368 | cysG |   | RTS_R4+_1031 |
| pORF+_3502008 | b3375 | frlR | U | RTS_R4+_1033 |
| pORF+_3520869 | b3396 | mrcA |   | RTS_R4+_1035 |
| pORF+_3524491 | b3398 | yrfF | U | RTS_R4+_1036 |
| pORF+_3527370 | b3400 | hslR |   | RTS_R4+_1038 |
| pORF+_3527790 | b3401 | hslO |   | RTS_R4+_1038 |
| pORF+_3530771 | b3403 | pck  |   | RTS_R4+_1039 |
| pORF+_3535407 | b3407 | yhgF | U | RTS_R4+_1041 |
| pORF+_3538417 | b3409 | feoB |   | RTS_R4+_1042 |
| pORF+_3543646 | b3414 | gntY | U | RTS_R4+_1044 |
| pORF+_3544581 | b3415 | gntT |   | RTS_R4+_1045 |
| pORF+_3551107 | b3418 | malT | U | RTS_R4+_1046 |
| pORF+_3560021 | b3426 | glpD |   | RTS_R4+_1048 |
| pORF+_3584966 | b3448 | yhhA | U | RTS_R4+_1053 |
| pORF+_3596007 | b3459 | yhhK | U | RTS_R4+_1055 |
| pORF+_3602416 | b3465 | rsmD | U | RTS_R4+_1056 |
| pORF+_3604474 | b3469 | zntA |   | RTS_R4+_1058 |
| pORF+_3607924 | b3472 | dcrB |   | RTS_R4+_1060 |
| pORF+_3611690 | b3476 | nikA |   | RTS_R4+_1062 |
| pORF+_3615799 | b3480 | nikE |   | RTS_R4+_1063 |
| pORF+_3616611 | b3481 | nikR |   | RTS_R4+_1063 |
| pORF+_3635665 | b3493 | pitA |   | RTS_R4+_1067 |
| pORF+_3638134 | b3495 | uspA |   | RTS_R4+_1068 |
| pORF+_3643357 | b3499 | yhiR | U | RTS_R4+_1070 |
| pORF+_3644322 | b3500 | gor  |   | RTS_R4+_1071 |
| pORF+_3646937 | b3502 | arsB |   | RTS_R4+_1073 |
| pORF+_3648260 | b3503 | arsC |   | RTS_R4+_1074 |
| pORF+_3651951 | b3506 | slp  |   | RTS_R4+_1075 |
| pORF+_3656311 | b3512 | gadE |   | RTS_R4+_1077 |
| pORF+_3657255 | b3513 | mdtE |   | RTS_R4+_1078 |
| pORF+_3658437 | b3514 | mdtF |   | RTS_R4+_1078 |
| pORF+_3672809 | b3523 | yhjE | U | RTS_R4+_1085 |
| pORF+_3677094 | b3526 | kdgK |   | RTS_R4+_1086 |
| pORF+_3694481 | b3536 | bcsE | U | RTS_R4+_1087 |
| pORF+_3696237 | b3538 | bcsG | U | RTS_R4+_1087 |
| pORF+_3714570 | b3552 | viaD | U | RTS_R4+_1093 |
| pORF+_3715321 | b3553 | ghrB |   | RTS_R4+_1094 |
| pORF+_3718072 | b3556 | cspA |   | RTS_R4+_1096 |
| pORF+_3719221 | b3558 | insK | U |              |
| pORF+_3729076 | b3566 | xyfF |   |              |
| pORF+_3737623 | b3572 | avtA |   | RTS_R4+_1101 |
| pORF+_3744117 | b3579 | viaO | U |              |

|               |       |      |   |              |
|---------------|-------|------|---|--------------|
| pORF+_3746600 | b3581 | sgbH |   |              |
| pORF+_3764345 | b3594 | yibA | U | RTS_R4+_1104 |
| pORF+_3766986 | b4651 | yibW | U | RTS_R4+_1106 |
| pORF+_3770304 | b3599 | mtlA |   | RTS_R4+_1107 |
| pORF+_3772129 | b3600 | mtlD |   | RTS_R4+_1108 |
| pORF+_3774688 | b3602 | yibL | U | RTS_R4+_1109 |
| pORF+_3775395 | b3603 | lldP |   | RTS_R4+_1110 |
| pORF+_3777850 | b3605 | lldD |   | RTS_R4+_1110 |
| pORF+_3779238 | b3606 | yibK | U | RTS_R4+_1111 |
| pORF+_3783139 | b3612 | gpmM |   | RTS_R4+_1112 |
| pORF+_3784837 | b3613 | envC |   | RTS_R4+_1113 |
| pORF+_3786124 | b3614 | yibQ | U | RTS_R4+_1114 |
| pORF+_3792010 | b3619 | rfaD |   | RTS_R4+_1115 |
| pORF+_3792952 | b3620 | rfaF |   | RTS_R4+_1115 |
| pORF+_3794971 | b3622 | rfaL |   | RTS_R4+_1116 |
| pORF+_3806563 | b3633 | waaA |   | RTS_R4+_1117 |
| pORF+_3807680 | b3634 | coaD |   | RTS_R4+_1118 |
| pORF+_3810682 | b3639 | dfp  |   | RTS_R4+_1119 |
| pORF+_3811952 | b3640 | dut  |   | RTS_R4+_1120 |
| pORF+_3812475 | b3641 | slmA |   | RTS_R4+_1120 |
| pORF+_3814699 | b3644 | yicC | U | RTS_R4+_1121 |
| pORF+_3816843 | b3646 | yicG | U |              |
| pORF+_3819394 | b3648 | gmk  |   | RTS_R4+_1122 |
| pORF+_3820129 | b3649 | rpoZ |   | RTS_R4+_1123 |
| pORF+_3820423 | b3650 | spoT |   | RTS_R4+_1123 |
| pORF+_3822538 | b3651 | trmH |   | RTS_R4+_1123 |
| pORF+_3823200 | b3652 | recG |   | RTS_R4+_1123 |
| pORF+_3826959 | b3654 | yicE | U | RTS_R4+_1124 |
| pORF+_3828456 | b3655 | yicH | U | RTS_R4+_1125 |
| pORF+_3841987 | b3665 | ade  |   | RTS_R4+_1129 |
| pORF+_3865676 | b3688 | yidQ | U | RTS_R4+_1134 |
| pORF+_3882359 | b3703 | rpmH |   | RTS_R4+_1136 |
| pORF+_3882516 | b3704 | rnpA |   | RTS_R4+_1136 |
| pORF+_3883099 | b3705 | yidC |   | RTS_R4+_1137 |
| pORF+_3884851 | b3706 | mnmE |   | RTS_R4+_1138 |
| pORF+_3886738 | b3708 | tnaA |   |              |
| pORF+_3892675 | b3713 | yieF |   | RTS_R4+_1141 |
| pORF+_3894797 | b3715 | yieH | U | RTS_R4+_1142 |
| pORF+_3925178 | b3744 | asnA |   | RTS_R4+_1146 |
| pORF+_3929339 | b3747 | kup  |   | RTS_R4+_1147 |
| pORF+_3931338 | b3748 | rbsD | U | RTS_R4+_1148 |
| pORF+_3931801 | b3749 | rbsA |   | RTS_R4+_1148 |
| pORF+_3934295 | b3751 | rbsB |   | RTS_R4+_1148 |
| pORF+_3935290 | b3752 | rbsK |   | RTS_R4+_1149 |
| pORF+_3936250 | b3753 | rbsR |   | RTS_R4+_1150 |
| pORF+_3946109 | b3764 | yifE | U | RTS_R4+_1154 |
| pORF+_3948583 | b4488 | ilvG | U | RTS_R4+_1156 |
| pORF+_3949646 | b4488 | ilvG | U | RTS_R4+_1156 |
| pORF+_3950441 | b3770 | ilvE |   | RTS_R4+_1156 |
| pORF+_3951501 | b3771 | ilvD |   | RTS_R4+_1156 |
| pORF+_3953354 | b3772 | ilvA |   | RTS_R4+_1156 |
| pORF+_3955858 | b3774 | ilvC |   | RTS_R4+_1157 |
| pORF+_3958649 | b3778 | rep  |   | RTS_R4+_1158 |
| pORF+_3963679 | b3781 | trxA |   | RTS_R4+_1160 |
| pORF+_3964368 | b3783 | rho  |   | RTS_R4+_1161 |
| pORF+_3967051 | b3785 | wzzE |   | RTS_R4+_1163 |
| pORF+_3968114 | b3786 | rffE |   | RTS_R4+_1164 |
| pORF+_3969283 | b3787 | rffD |   | RTS_R4+_1164 |
| pORF+_3970545 | b3788 | rffG |   | RTS_R4+_1164 |
| pORF+_3971631 | b3789 | rffH |   | RTS_R4+_1164 |
| pORF+_3973169 | b3791 | rffA |   | RTS_R4+_1164 |
| pORF+_3974301 | b3792 | wzxE |   | RTS_R4+_1164 |
| pORF+_3975548 | b4481 | rffT |   | RTS_R4+_1164 |



|               |       |      |   |              |
|---------------|-------|------|---|--------------|
| pORF+_3976624 | b3793 | wzyE | U | RTS_R4+_1164 |
| pORF+_3977979 | b3794 | rffM |   | RTS_R4+_1164 |
| pORF+_3989176 | b3806 | cyaA |   | RTS_R4+_1169 |
| pORF+_3992545 | b4558 | yifL | U | RTS_R4+_1170 |
| pORF+_3992782 | b3809 | dapF |   | RTS_R4+_1170 |
| pORF+_3993606 | b3810 | yigA | U | RTS_R4+_1170 |
| pORF+_3994310 | b3811 | xerC |   | RTS_R4+_1170 |
| pORF+_3995206 | b3812 | yigB | U | RTS_R4+_1170 |
| pORF+_3995817 | b3813 | uvrD |   | RTS_R4+_1171 |
| pORF+_3999434 | b3816 | corA |   | RTS_R4+_1172 |
| pORF+_4002885 | b3821 | pldA |   | RTS_R4+_1173 |
| pORF+_4003881 | b3822 | recQ |   | RTS_R4+_1174 |
| pORF+_4007193 | b3825 | pldB |   | RTS_R4+_1175 |
| pORF+_4008097 | b3826 | yigL | U | RTS_R4+_1175 |
| pORF+_4011076 | b3829 | metE |   | RTS_R4+_1177 |
| pORF+_4014448 | b3831 | udp  |   | RTS_R4+_1178 |
| pORF+_4015356 | b3832 | rmuC | U | RTS_R4+_1178 |
| pORF+_4016878 | b3833 | ubiE |   | RTS_R4+_1179 |
| pORF+_4017602 | b3834 | yigP | U | RTS_R4+_1179 |
| pORF+_4018249 | b3835 | ubiB |   | RTS_R4+_1179 |
| pORF+_4019926 | b3836 | tatA |   | RTS_R4+_1180 |
| pORF+_4020241 | b3838 | tatB |   | RTS_R4+_1180 |
| pORF+_4023011 | b3843 | ubiD |   | RTS_R4+_1181 |
| pORF+_4024517 | b3844 | fre  |   | RTS_R4+_1181 |
| pORF+_4029184 | b3847 | pepQ |   | RTS_R4+_1182 |
| pORF+_4031168 | b3849 | trkH |   | RTS_R4+_1183 |
| pORF+_4032631 | b3850 | hemG |   | RTS_R4+_1183 |
| pORF+_4040062 | b3858 | yihD | U | RTS_R4+_1185 |
| pORF+_4040438 | b3859 | rdoA |   | RTS_R4+_1186 |
| pORF+_4041441 | b3860 | dsbA |   | RTS_R4+_1187 |
| pORF+_4044989 | b3863 | polA |   | RTS_R4+_1188 |
| pORF+_4049307 | b3866 | yihI | U | RTS_R4+_1191 |
| pORF+_4050062 | b3867 | hemN |   | RTS_R4+_1191 |
| pORF+_4056430 | b3871 | typA |   | RTS_R4+_1192 |
| pORF+_4059188 | b3873 | yihM | U |              |
| pORF+_4072668 | b3884 | yihW | U | RTS_R4+_1193 |
| pORF+_4073555 | b3885 | yihX | U | RTS_R4+_1193 |
| pORF+_4075038 | b3887 | dtd  |   | RTS_R4+_1194 |
| pORF+_4075472 | b3888 | yiiD | U | RTS_R4+_1194 |
| pORF+_4084039 | b3895 | fdhD |   | RTS_R4+_1195 |
| pORF+_4098827 | b3908 | sodA |   | RTS_R4+_1196 |
| pORF+_4100815 | b3910 | yiiM | U | RTS_R4+_1197 |
| pORF+_4103840 | b4484 | cpxP |   | RTS_R4+_1198 |
| pORF+_4104474 | b3915 | fieF |   | RTS_R4+_1199 |
| pORF+_4105479 | b3916 | pfkA |   | RTS_R4+_1200 |
| pORF+_4106857 | b3917 | sbp  |   | RTS_R4+_1201 |
| pORF+_4107761 | b3918 | cdh  |   | RTS_R4+_1202 |
| pORF+_4110990 | b3922 | yiiS | U | RTS_R4+_1204 |
| pORF+_4111316 | b3923 | uspD |   | RTS_R4+_1204 |
| pORF+_4116520 | b3928 | yiiU | U | RTS_R4+_1205 |
| pORF+_4125036 | b3936 | rpmE |   | RTS_R4+_1207 |
| pORF+_4126518 | b3939 | metB |   | RTS_R4+_1208 |
| pORF+_4127858 | b3940 | metL |   | RTS_R4+_1208 |
| pORF+_4130639 | b3941 | metF |   | RTS_R4+_1209 |
| pORF+_4131819 | b3942 | katG |   | RTS_R4+_1210 |
| pORF+_4153024 | b3958 | argC |   | RTS_R4+_1213 |
| pORF+_4154003 | b3959 | argB |   | RTS_R4+_1213 |
| pORF+_4154873 | b3960 | argH |   | RTS_R4+_1213 |
| pORF+_4156483 | b3961 | oxyR |   | RTS_R4+_1214 |
| pORF+_4159051 | b3963 | fabR |   | RTS_R4+_1215 |
| pORF+_4161617 | b3966 | btuB |   | RTS_R4+_1216 |
| pORF+_4163439 | b3967 | murI |   | RTS_R4+_1217 |
| pORF+_4170080 | b3972 | murB |   | RTS_R4+_1219 |

|                |       |      |   |               |
|----------------|-------|------|---|---------------|
| pORF_+_4171105 | b3973 | birA |   | RTS_R4_+_1219 |
| pORF_+_4173967 | b3980 | tufB |   | RTS_R4_+_1220 |
| pORF_+_4175381 | b3981 | secE |   | RTS_R4_+_1221 |
| pORF_+_4175766 | b3982 | nusG |   | RTS_R4_+_1221 |
| pORF_+_4176470 | b3983 | rplK |   | RTS_R4_+_1222 |
| pORF_+_4176902 | b3984 | rplA |   | RTS_R4_+_1222 |
| pORF_+_4178019 | b3985 | rplJ |   | RTS_R4_+_1223 |
| pORF_+_4178583 | b3986 | rplL |   | RTS_R4_+_1223 |
| pORF_+_4179235 | b3987 | rpoB |   | RTS_R4_+_1224 |
| pORF_+_4183373 | b3988 | rpoC |   | RTS_R4_+_1224 |
| pORF_+_4194926 | b3996 | nudC |   | RTS_R4_+_1225 |
| pORF_+_4195739 | b3997 | hemE |   | RTS_R4_+_1226 |
| pORF_+_4196807 | b3998 | nfi  |   | RTS_R4_+_1227 |
| pORF_+_4197527 | b3999 | yjaG | U | RTS_R4_+_1228 |
| pORF_+_4198304 | b4000 | hupA |   | RTS_R4_+_1229 |
| pORF_+_4211221 | b4011 | yjaA | U |               |
| pORF_+_4212303 | b4013 | metA |   | RTS_R4_+_1233 |
| pORF_+_4213483 | b4014 | aceB |   | RTS_R4_+_1234 |
| pORF_+_4215117 | b4015 | aceA |   | RTS_R4_+_1234 |
| pORF_+_4216619 | b4016 | aceK |   | RTS_R4_+_1235 |
| pORF_+_4221830 | b4019 | metH |   | RTS_R4_+_1236 |
| pORF_+_4225754 | b4020 | yjbB | U | RTS_R4_+_1237 |
| pORF_+_4228377 | b4022 | rluF |   | RTS_R4_+_1238 |
| pORF_+_4231775 | b4025 | pgi  |   | RTS_R4_+_1239 |
| pORF_+_4244717 | b4035 | malk |   | RTS_R4_+_1242 |
| pORF_+_4245994 | b4036 | lamB |   | RTS_R4_+_1242 |
| pORF_+_4247568 | b4037 | malM |   | RTS_R4_+_1242 |
| pORF_+_4250418 | b4039 | ubiC |   | RTS_R4_+_1243 |
| pORF_+_4254660 | b4042 | dgkA |   | RTS_R4_+_1244 |
| pORF_+_4255138 | b4043 | lexA |   | RTS_R4_+_1245 |
| pORF_+_4257254 | b4045 | yjbJ | U | RTS_R4_+_1247 |
| pORF_+_4259686 | b4049 | dusA |   | RTS_R4_+_1248 |
| pORF_+_4262337 | b4052 | dnaB |   | RTS_R4_+_1249 |
| pORF_+_4263805 | b4053 | alr  |   | RTS_R4_+_1249 |
| pORF_+_4265095 | b4054 | tyrB |   | RTS_R4_+_1250 |
| pORF_+_4267197 | b4055 | aphA |   | RTS_R4_+_1251 |
| pORF_+_4268261 | b4056 | yjbQ | U | RTS_R4_+_1252 |
| pORF_+_4268681 | b4057 | yjbR | U | RTS_R4_+_1252 |
| pORF_+_4272085 | b4059 | ssb  |   | RTS_R4_+_1253 |
| pORF_+_4276502 | b4064 | yjcD | U | RTS_R4_+_1256 |
| pORF_+_4278003 | b4065 | yjcE | U | RTS_R4_+_1257 |
| pORF_+_4285754 | b4070 | nrfA |   |               |
| pORF_+_4289511 | b4074 | nrfE |   |               |
| pORF_+_4292504 | b4077 | gltP |   | RTS_R4_+_1258 |
| pORF_+_4327383 | b4110 | yjcZ | U | RTS_R4_+_1263 |
| pORF_+_4328492 | b4111 | proP |   | RTS_R4_+_1264 |
| pORF_+_4339934 | b4119 | melA |   | RTS_R4_+_1265 |
| pORF_+_4349866 | b4126 | yjdI | U | RTS_R4_+_1266 |
| pORF_+_4368711 | b4142 | groS |   | RTS_R4_+_1270 |
| pORF_+_4369048 | b4143 | groL |   | RTS_R4_+_1271 |
| pORF_+_4370799 | b4144 | yjeI | U | RTS_R4_+_1272 |
| pORF_+_4373722 | b4147 | efp  |   | RTS_R4_+_1273 |
| pORF_+_4374340 | b4410 | ecnA |   | RTS_R4_+_1274 |
| pORF_+_4374576 | b4411 | ecnB |   | RTS_R4_+_1275 |
| pORF_+_4380621 | b4155 | poxA | U | RTS_R4_+_1277 |
| pORF_+_4389483 | b4162 | orn  |   | RTS_R4_+_1278 |
| pORF_+_4392068 | b4167 | yjeF | U | RTS_R4_+_1280 |
| pORF_+_4393608 | b4168 | yjeE |   | RTS_R4_+_1281 |
| pORF_+_4394073 | b4169 | amiB |   | RTS_R4_+_1281 |
| pORF_+_4395432 | b4170 | mutL |   | RTS_R4_+_1282 |
| pORF_+_4397275 | b4171 | miaA |   | RTS_R4_+_1283 |
| pORF_+_4398311 | b4172 | hfq  |   | RTS_R4_+_1284 |
| pORF_+_4398695 | b4173 | hflX | U | RTS_R4_+_1284 |

|                |       |      |   |               |
|----------------|-------|------|---|---------------|
| pORF_+_4400061 | b4174 | hflK |   | RTS_R4_+_1284 |
| pORF_+_4401323 | b4175 | hflC |   | RTS_R4_+_1284 |
| pORF_+_4402710 | b4177 | purA |   | RTS_R4_+_1286 |
| pORF_+_4404213 | b4178 | nsrR | U | RTS_R4_+_1288 |
| pORF_+_4404635 | b4179 | rnr  |   | RTS_R4_+_1288 |
| pORF_+_4407298 | b4180 | rlmB |   | RTS_R4_+_1289 |
| pORF_+_4411036 | b4186 | yjfC | U |               |
| pORF_+_4412280 | b4187 | aidB |   | RTS_R4_+_1290 |
| pORF_+_4414975 | b4190 | yjfp | U | RTS_R4_+_1291 |
| pORF_+_4420011 | b4196 | ulaD |   |               |
| pORF_+_4423141 | b4200 | rpsF |   | RTS_R4_+_1292 |
| pORF_+_4423862 | b4202 | rpsR |   | RTS_R4_+_1292 |
| pORF_+_4424131 | b4203 | rplI |   | RTS_R4_+_1292 |
| pORF_+_4426799 | b4207 | fkfB |   | RTS_R4_+_1294 |
| pORF_+_4427887 | b4208 | cycA |   | RTS_R4_+_1295 |
| pORF_+_4434778 | b4214 | cysQ |   | RTS_R4_+_1298 |
| pORF_+_4440405 | b4220 | ytfM | U | RTS_R4_+_1301 |
| pORF_+_4442135 | b4221 | ytfN | U | RTS_R4_+_1301 |
| pORF_+_4445917 | b4222 | ytfP | U | RTS_R4_+_1301 |
| pORF_+_4447985 | b4227 | ytfQ | U | RTS_R4_+_1303 |
| pORF_+_4449081 | b4485 | ytfR | U | RTS_R4_+_1303 |
| pORF_+_4453808 | b4233 | mpl  |   | RTS_R4_+_1304 |
| pORF_+_4455982 | b4235 | pmbA | U | RTS_R4_+_1305 |
| pORF_+_4465648 | b4242 | mgta |   | RTS_R4_+_1307 |
| pORF_+_4472147 | b4251 | yjgJ | U | RTS_R4_+_1309 |
| pORF_+_4472876 | b4252 | yjgK | U | RTS_R4_+_1310 |
| pORF_+_4476496 | b4255 | rraB | U | RTS_R4_+_1312 |
| pORF_+_4484241 | b4261 | yjgP | U | RTS_R4_+_1313 |
| pORF_+_4485338 | b4262 | yjgQ | U | RTS_R4_+_1313 |
| pORF_+_4494773 | b4271 | intB | U | RTS_R4_+_1316 |
| pORF_+_4503295 | b4280 | yjhC | U | RTS_R4_+_1318 |
| pORF_+_4538950 | b4312 | fimB |   | RTS_R4_+_1328 |
| pORF_+_4541138 | b4314 | fimA |   | RTS_R4_+_1330 |
| pORF_+_4542327 | b4316 | fimC |   | RTS_R4_+_1331 |
| pORF_+_4546822 | b4320 | fimH |   | RTS_R4_+_1333 |
| pORF_+_4549623 | b4322 | uxuA |   | RTS_R4_+_1335 |
| pORF_+_4550924 | b4323 | uxuB |   | RTS_R4_+_1335 |
| pORF_+_4552599 | b4324 | uxuR |   | RTS_R4_+_1336 |
| pORF_+_4584972 | b4351 | mrr  |   | RTS_R4_+_1345 |
| pORF_+_4589680 | b4355 | tsr  |   | RTS_R4_+_1346 |
| pORF_+_4605826 | b4372 | holD |   | RTS_R4_+_1349 |
| pORF_+_4606208 | b4373 | rimI |   | RTS_R4_+_1349 |
| pORF_+_4606669 | b4374 | yjjG |   | RTS_R4_+_1349 |
| pORF_+_4607410 | b4375 | prfC |   | RTS_R4_+_1349 |
| pORF_+_4609341 | b4376 | osmY |   | RTS_R4_+_1350 |
| pORF_+_4611504 | b4378 | yjjV | U | RTS_R4_+_1351 |
| pORF_+_4615322 | b4381 | deoC |   | RTS_R4_+_1353 |
| pORF_+_4616252 | b4382 | deoA |   | RTS_R4_+_1353 |
| pORF_+_4617626 | b4383 | deoB |   | RTS_R4_+_1354 |
| pORF_+_4618849 | b4384 | deoD |   | RTS_R4_+_1354 |
| pORF_+_4622780 | b4388 | serB |   | RTS_R4_+_1356 |
| pORF_+_4623887 | b4389 | radA | U | RTS_R4_+_1356 |
| pORF_+_4625317 | b4390 | nadR |   | RTS_R4_+_1357 |
| pORF_+_4628726 | b4392 | slt  |   | RTS_R4_+_1358 |
| pORF_+_4630783 | b4393 | trpR |   | RTS_R4_+_1359 |
| pORF_+_4631820 | b4395 | ytjC |   | RTS_R4_+_1360 |
| pORF_+_4633544 | b4397 | creA | U | RTS_R4_+_1361 |
| pORF_+_4634030 | b4398 | creB |   | RTS_R4_+_1361 |
| pORF_+_4634719 | b4399 | creC |   | RTS_R4_+_1361 |
| pORF_+_4638944 | b4403 | yjtD | U | RTS_R4_+_1364 |
| pORF_-_5683    | b0006 | yaaA | U | RTS_R4_-_1    |
| pORF_-_20815   | b0023 | rpsT |   | RTS_R4_-_7    |
| pORF_-_50380   | b0049 | apaH |   | RTS_R4_-_11   |

|               |       |      |   |             |
|---------------|-------|------|---|-------------|
| pORF_-_51609  | b0051 | ksgA |   | RTS_R4_-_12 |
| pORF_-_52427  | b0052 | pdxA |   | RTS_R4_-_13 |
| pORF_-_53416  | b0053 | surA |   | RTS_R4_-_13 |
| pORF_-_54755  | b0054 | imp  |   | RTS_R4_-_14 |
| pORF_-_59687  | b0058 | rluA |   | RTS_R4_-_15 |
| pORF_-_60358  | b0059 | hepA |   | RTS_R4_-_15 |
| pORF_-_65855  | b0061 | araD |   | RTS_R4_-_17 |
| pORF_-_66835  | b0062 | araA |   | RTS_R4_-_17 |
| pORF_-_68348  | b0063 | araB |   | RTS_R4_-_17 |
| pORF_-_72229  | b0066 | thiQ |   | RTS_R4_-_18 |
| pORF_-_72911  | b0067 | thiP |   | RTS_R4_-_18 |
| pORF_-_74497  | b0068 | tbpA |   | RTS_R4_-_18 |
| pORF_-_75644  | b0069 | sgrR |   | RTS_R4_-_19 |
| pORF_-_78848  | b0071 | leuD |   | RTS_R4_-_20 |
| pORF_-_79464  | b0072 | leuC |   | RTS_R4_-_20 |
| pORF_-_80867  | b0073 | leuB |   | RTS_R4_-_20 |
| pORF_-_81958  | b0074 | leuA |   | RTS_R4_-_20 |
| pORF_-_111649 | b0101 | yacG | U | RTS_R4_-_21 |
| pORF_-_111856 | b0102 | yacF | U | RTS_R4_-_21 |
| pORF_-_112599 | b0103 | coaE |   | RTS_R4_-_22 |
| pORF_-_117752 | b0109 | nadC |   | RTS_R4_-_24 |
| pORF_-_120178 | b0112 | aroP |   | RTS_R4_-_25 |
| pORF_-_134788 | b0120 | speD |   | RTS_R4_-_26 |
| pORF_-_135598 | b0121 | speE |   | RTS_R4_-_26 |
| pORF_-_136570 | b0122 | yacC | U | RTS_R4_-_27 |
| pORF_-_138835 | b0124 | gcd  |   | RTS_R4_-_28 |
| pORF_-_142008 | b0126 | can  |   | RTS_R4_-_29 |
| pORF_-_146314 | b0131 | panD |   | RTS_R4_-_30 |
| pORF_-_147944 | b0133 | panC |   | RTS_R4_-_31 |
| pORF_-_148807 | b0134 | panB |   | RTS_R4_-_31 |
| pORF_-_152829 | b0139 | htrE | U |             |
| pORF_-_157253 | b0142 | folK |   | RTS_R4_-_32 |
| pORF_-_157729 | b0143 | pcnB |   | RTS_R4_-_32 |
| pORF_-_160149 | b0145 | dksA |   | RTS_R4_-_33 |
| pORF_-_173602 | b0154 | hemL |   | RTS_R4_-_36 |
| pORF_-_178455 | b0159 | mtn  |   | RTS_R4_-_37 |
| pORF_-_183709 | b0163 | yaeH | U | RTS_R4_-_38 |
| pORF_-_184257 | b0164 | yaeI | U | RTS_R4_-_39 |
| pORF_-_185123 | b0166 | dapD |   | RTS_R4_-_39 |
| pORF_-_185978 | b0167 | glnD |   | RTS_R4_-_40 |
| pORF_-_188712 | b0168 | map  |   | RTS_R4_-_41 |
| pORF_-_213678 | b0189 | rof  |   | RTS_R4_-_42 |
| pORF_-_213925 | b4406 | yaeP | U | RTS_R4_-_42 |
| pORF_-_217057 | b0194 | proS |   | RTS_R4_-_43 |
| pORF_-_218887 | b0195 | yaeB | U | RTS_R4_-_44 |
| pORF_-_219591 | b0196 | rscF | U | RTS_R4_-_44 |
| pORF_-_220113 | b0197 | metQ |   | RTS_R4_-_45 |
| pORF_-_220968 | b0198 | metI |   | RTS_R4_-_45 |
| pORF_-_221614 | b0199 | metN |   | RTS_R4_-_45 |
| pORF_-_229967 | b0208 | yafC | U | RTS_R4_-_46 |
| pORF_-_234027 | b0212 | gloB | U | RTS_R4_-_48 |
| pORF_-_235535 | b0214 | rnhA |   | RTS_R4_-_49 |
| pORF_-_239419 | b0219 | yafV | U | RTS_R4_-_50 |
| pORF_-_240859 | b0221 | fadE |   | RTS_R4_-_51 |
| pORF_-_246242 | b0226 | dinJ | U | RTS_R4_-_53 |
| pORF_-_254259 | b0237 | pepD |   | RTS_R4_-_55 |
| pORF_-_258269 | b0241 | phoE |   |             |
| pORF_-_262914 | b0246 | yafW |   |             |
| pORF_-_264844 | b0250 | ykfB | U | RTS_R4_-_57 |
| pORF_-_273325 | b0259 | insH |   | RTS_R4_-_59 |
| pORF_-_287628 | b0272 | yagI | U | RTS_R4_-_63 |
| pORF_-_288525 | b0273 | argF |   | RTS_R4_-_64 |
| pORF_-_294920 | b0281 | intF | U | RTS_R4_-_67 |

|               |       |      |   |              |
|---------------|-------|------|---|--------------|
| pORF_-_296994 | b0283 | yagQ | U | RTS_R4_-_68  |
| pORF_-_300155 | b0285 | yagS | U | RTS_R4_-_68  |
| pORF_-_306031 | b0291 | yagX | U | RTS_R4_-_71  |
| pORF_-_309308 | b0293 | matB | U | RTS_R4_-_71  |
| pORF_-_311598 | b4506 | ykgO |   | RTS_R4_-_72  |
| pORF_-_311738 | b0296 | ykgM |   | RTS_R4_-_72  |
| pORF_-_317900 | b0304 | ykgC | U | RTS_R4_-_75  |
| pORF_-_326485 | b0312 | betB |   | RTS_R4_-_76  |
| pORF_-_327971 | b0313 | betI |   | RTS_R4_-_76  |
| pORF_-_346081 | b0330 | prpR |   | RTS_R4_-_79  |
| pORF_-_360473 | b0342 | lacA |   |              |
| pORF_-_361150 | b0343 | lacY |   |              |
| pORF_-_365652 | b0345 | lacI |   | RTS_R4_-_81  |
| pORF_-_366811 | b0346 | mhpR |   | RTS_R4_-_81  |
| pORF_-_376759 | b0355 | frmB | U | RTS_R4_-_82  |
| pORF_-_377686 | b0356 | frmA |   | RTS_R4_-_83  |
| pORF_-_378830 | b0357 | frmR |   | RTS_R4_-_83  |
| pORF_-_387977 | b0369 | hemB |   | RTS_R4_-_86  |
| pORF_-_390963 | b0372 | insF |   | RTS_R4_-_87  |
| pORF_-_391826 | b0373 | insE |   | RTS_R4_-_87  |
| pORF_-_394354 | b0376 | ampH |   | RTS_R4_-_88  |
| pORF_-_399053 | b0381 | ddlA |   | RTS_R4_-_90  |
| pORF_-_404059 | b0386 | proC |   | RTS_R4_-_92  |
| pORF_-_408332 | b0393 | rdgC |   | RTS_R4_-_94  |
| pORF_-_411831 | b0397 | sbcC |   | RTS_R4_-_96  |
| pORF_-_414974 | b0398 | sbcD |   | RTS_R4_-_96  |
| pORF_-_430353 | b0411 | tsx  |   | RTS_R4_-_99  |
| pORF_-_436385 | b0419 | yajO | U | RTS_R4_-_101 |
| pORF_-_437539 | b0420 | dxs  |   | RTS_R4_-_102 |
| pORF_-_439426 | b0421 | ispA |   | RTS_R4_-_103 |
| pORF_-_440325 | b0422 | xseB |   | RTS_R4_-_103 |
| pORF_-_442275 | b0424 | yajL | U | RTS_R4_-_104 |
| pORF_-_442828 | b0425 | panE |   | RTS_R4_-_104 |
| pORF_-_447874 | b0431 | cyoB |   | RTS_R4_-_106 |
| pORF_-_449887 | b0432 | cyoA |   | RTS_R4_-_106 |
| pORF_-_451294 | b0433 | ampG |   | RTS_R4_-_107 |
| pORF_-_452813 | b0434 | yajG | U | RTS_R4_-_107 |
| pORF_-_464076 | b0444 | queC | U | RTS_R4_-_108 |
| pORF_-_464836 | b0445 | ybaE | U | RTS_R4_-_109 |
| pORF_-_473525 | b0452 | tesB |   | RTS_R4_-_110 |
| pORF_-_476291 | b0457 | ylaB | U | RTS_R4_-_112 |
| pORF_-_478591 | b0459 | maa  |   | RTS_R4_-_114 |
| pORF_-_479314 | b0460 | hha  |   | RTS_R4_-_115 |
| pORF_-_480478 | b0462 | acrB |   | RTS_R4_-_116 |
| pORF_-_483650 | b0463 | acrA |   | RTS_R4_-_116 |
| pORF_-_489509 | b0467 | priC |   | RTS_R4_-_118 |
| pORF_-_500786 | b0478 | ybaL | U | RTS_R4_-_121 |
| pORF_-_505827 | b0481 | ybaK | U | RTS_R4_-_123 |
| pORF_-_508099 | b0484 | copA |   | RTS_R4_-_125 |
| pORF_-_514080 | b0489 | qmcA | U | RTS_R4_-_126 |
| pORF_-_516649 | b0492 | ybbN | U | RTS_R4_-_127 |
| pORF_-_517564 | b0493 | ybbO | U | RTS_R4_-_128 |
| pORF_-_518363 | b0494 | tesA |   | RTS_R4_-_128 |
| pORF_-_529356 | b0503 | ybbB |   | RTS_R4_-_129 |
| pORF_-_542485 | b0515 | ylbA | U | RTS_R4_-_130 |
| pORF_-_550750 | b0522 | purK |   | RTS_R4_-_131 |
| pORF_-_551814 | b0523 | purE |   | RTS_R4_-_131 |
| pORF_-_553166 | b0525 | ppiB |   | RTS_R4_-_132 |
| pORF_-_555884 | b0528 | ybcJ | U | RTS_R4_-_134 |
| pORF_-_556098 | b0529 | folD |   | RTS_R4_-_134 |
| pORF_-_564038 | b0537 | intD | U | RTS_R4_-_135 |
| pORF_-_573960 | b0552 | insH |   | RTS_R4_-_137 |
| pORF_-_574981 | b0553 | nmpC | U | RTS_R4_-_138 |

|               |       |      |   |              |
|---------------|-------|------|---|--------------|
| pORF_-_577823 | b0557 | borD | U | RTS_R4_-_139 |
| pORF_-_583903 | b0565 | ompT |   | RTS_R4_-_142 |
| pORF_-_586314 | b0567 | ybcH | U | RTS_R4_-_144 |
| pORF_-_587205 | b0568 | nfrA |   | RTS_R4_-_144 |
| pORF_-_592551 | b0570 | cusS |   | RTS_R4_-_146 |
| pORF_-_593983 | b0571 | cusR |   | RTS_R4_-_146 |
| pORF_-_603994 | b0578 | nfsB |   | RTS_R4_-_149 |
| pORF_-_604741 | b0579 | ybdF | U | RTS_R4_-_150 |
| pORF_-_605488 | b0581 | ybdK | U | RTS_R4_-_151 |
| pORF_-_609477 | b0584 | fepA |   | RTS_R4_-_153 |
| pORF_-_618607 | b0588 | fepC |   | RTS_R4_-_154 |
| pORF_-_622777 | b0592 | fepB |   | RTS_R4_-_155 |
| pORF_-_631612 | b0599 | ybdH | U | RTS_R4_-_157 |
| pORF_-_634572 | b0602 | ybdN | U |              |
| pORF_-_637050 | b0604 | dsbG |   | RTS_R4_-_158 |
| pORF_-_640662 | b0607 | uspG |   | RTS_R4_-_159 |
| pORF_-_642780 | b0610 | rnk  |   | RTS_R4_-_160 |
| pORF_-_643420 | b0611 | rna  |   | RTS_R4_-_161 |
| pORF_-_653806 | b0621 | dcuC |   | RTS_R4_-_162 |
| pORF_-_658474 | b0628 | lipA |   | RTS_R4_-_164 |
| pORF_-_660860 | b0630 | lipB |   | RTS_R4_-_165 |
| pORF_-_661602 | b0631 | ybeD | U | RTS_R4_-_166 |
| pORF_-_661975 | b0632 | dacA |   | RTS_R4_-_167 |
| pORF_-_663325 | b0633 | rlpA |   | RTS_R4_-_168 |
| pORF_-_665539 | b0635 | mrda |   | RTS_R4_-_169 |
| pORF_-_667471 | b0636 | ybeA | U | RTS_R4_-_169 |
| pORF_-_667942 | b0637 | ybeB | U | RTS_R4_-_169 |
| pORF_-_669797 | b0640 | hoIA |   | RTS_R4_-_171 |
| pORF_-_670828 | b0641 | rlpB |   | RTS_R4_-_171 |
| pORF_-_671424 | b0642 | leuS |   | RTS_R4_-_171 |
| pORF_-_680946 | b0650 | hscC |   | RTS_R4_-_173 |
| pORF_-_682700 | b0651 | rihA |   | RTS_R4_-_174 |
| pORF_-_683753 | b0652 | gltL |   | RTS_R4_-_175 |
| pORF_-_685152 | b0654 | gltJ |   | RTS_R4_-_175 |
| pORF_-_686062 | b0655 | gltI |   | RTS_R4_-_176 |
| pORF_-_687220 | b0656 | insH |   | RTS_R4_-_177 |
| pORF_-_688566 | b0657 | Int  |   | RTS_R4_-_178 |
| pORF_-_690129 | b0658 | ybeX |   | RTS_R4_-_178 |
| pORF_-_691097 | b0659 | ybeY | U | RTS_R4_-_179 |
| pORF_-_691561 | b0660 | ybeZ | U | RTS_R4_-_179 |
| pORF_-_692754 | b0661 | miaB |   | RTS_R4_-_180 |
| pORF_-_696736 | b0674 | asnB |   | RTS_R4_-_183 |
| pORF_-_698797 | b0675 | nagD |   | RTS_R4_-_184 |
| pORF_-_699597 | b0676 | nagC |   | RTS_R4_-_185 |
| pORF_-_700826 | b0677 | nagA |   | RTS_R4_-_186 |
| pORF_-_702034 | b0678 | nagB |   | RTS_R4_-_186 |
| pORF_-_709423 | b0683 | fur  |   | RTS_R4_-_187 |
| pORF_-_710158 | b0684 | fldA |   | RTS_R4_-_188 |
| pORF_-_710828 | b0685 | ybfE | U | RTS_R4_-_189 |
| pORF_-_711261 | b0686 | ybfF | U | RTS_R4_-_189 |
| pORF_-_717485 | b0693 | speF |   | RTS_R4_-_190 |
| pORF_-_720953 | b0695 | kdpD |   | RTS_R4_-_192 |
| pORF_-_752408 | b0720 | gltA |   | RTS_R4_-_196 |
| pORF_-_784160 | b0753 | ybgS | U | RTS_R4_-_199 |
| pORF_-_786066 | b0755 | gpmA |   | RTS_R4_-_200 |
| pORF_-_787020 | b0756 | galM |   | RTS_R4_-_201 |
| pORF_-_788054 | b0757 | galK |   | RTS_R4_-_202 |
| pORF_-_789206 | b0758 | galT |   | RTS_R4_-_202 |
| pORF_-_790262 | b0759 | galE |   | RTS_R4_-_202 |
| pORF_-_791539 | b0760 | modF |   | RTS_R4_-_203 |
| pORF_-_793079 | b0761 | modE |   | RTS_R4_-_204 |
| pORF_-_796836 | b0766 | ybhA | U | RTS_R4_-_205 |
| pORF_-_805221 | b0772 | ybhC | U | RTS_R4_-_207 |

|                |       |      |   |              |
|----------------|-------|------|---|--------------|
| pORF_-_806656  | b0773 | ybhB | U | RTS_R4_-_208 |
| pORF_-_807191  | b0774 | bioA |   | RTS_R4_-_209 |
| pORF_-_814962  | b0780 | ybhK | U | RTS_R4_-_210 |
| pORF_-_821721  | b0789 | ybhO |   | RTS_R4_-_211 |
| pORF_-_824225  | b0792 | ybhR | U | RTS_R4_-_212 |
| pORF_-_826468  | b0794 | ybhF | U | RTS_R4_-_212 |
| pORF_-_828197  | b0795 | ybhG | U | RTS_R4_-_213 |
| pORF_-_829195  | b0796 | ybiH | U | RTS_R4_-_213 |
| pORF_-_836888  | b0802 | ybiJ | U | RTS_R4_-_215 |
| pORF_-_837753  | b0804 | ybiX | U | RTS_R4_-_217 |
| pORF_-_838472  | b0805 | fiu  | U | RTS_R4_-_218 |
| pORF_-_842478  | b0808 | ybiO | U | RTS_R4_-_220 |
| pORF_-_844964  | b0809 | glnQ |   | RTS_R4_-_221 |
| pORF_-_846481  | b0811 | glnH |   | RTS_R4_-_221 |
| pORF_-_847631  | b0812 | dps  |   | RTS_R4_-_222 |
| pORF_-_854047  | b0819 | ybiS | U | RTS_R4_-_226 |
| pORF_-_857019  | b0821 | ybiU | U | RTS_R4_-_227 |
| pORF_-_858436  | b0822 | ybiV | U | RTS_R4_-_227 |
| pORF_-_859397  | b0823 | ybiW | U |              |
| pORF_-_863603  | b0826 | moeB |   | RTS_R4_-_228 |
| pORF_-_864352  | b0827 | moeA |   | RTS_R4_-_228 |
| pORF_-_875933  | b0835 | yliG | U | RTS_R4_-_229 |
| pORF_-_879077  | b0838 | yliJ | U | RTS_R4_-_230 |
| pORF_-_881199  | b0840 | deoR |   | RTS_R4_-_231 |
| pORF_-_884539  | b0844 | ybjI | U | RTS_R4_-_232 |
| pORF_-_885354  | b0845 | ybjJ | U | RTS_R4_-_232 |
| pORF_-_887357  | b0847 | ybjL | U | RTS_R4_-_234 |
| pORF_-_889719  | b0849 | grxA |   | RTS_R4_-_235 |
| pORF_-_899067  | b0860 | artJ |   | RTS_R4_-_236 |
| pORF_-_900757  | b0862 | artQ |   | RTS_R4_-_237 |
| pORF_-_901480  | b0863 | artI |   | RTS_R4_-_237 |
| pORF_-_902229  | b0864 | artP |   | RTS_R4_-_237 |
| pORF_-_903175  | b0865 | ybjP | U | RTS_R4_-_238 |
| pORF_-_904963  | b0868 | ybjS | U | RTS_R4_-_239 |
| pORF_-_907516  | b0870 | ltaE |   | RTS_R4_-_240 |
| pORF_-_908554  | b0871 | poxB |   | RTS_R4_-_241 |
| pORF_-_917351  | b0877 | ybjX | U | RTS_R4_-_246 |
| pORF_-_921589  | b0880 | cspD |   | RTS_R4_-_247 |
| pORF_-_925448  | b0884 | infA |   | RTS_R4_-_249 |
| pORF_-_926697  | b0886 | cydC |   | RTS_R4_-_251 |
| pORF_-_928419  | b0887 | cydD |   | RTS_R4_-_251 |
| pORF_-_930308  | b0888 | trxB |   | RTS_R4_-_252 |
| pORF_-_944154  | b0897 | ycaC | U | RTS_R4_-_253 |
| pORF_-_949563  | b0902 | pflA |   | RTS_R4_-_255 |
| pORF_-_950495  | b0903 | pflB |   | RTS_R4_-_256 |
| pORF_-_952832  | b0904 | focA |   | RTS_R4_-_257 |
| pORF_-_954095  | b0905 | ycaO | U | RTS_R4_-_258 |
| pORF_-_983742  | b0928 | aspC |   | RTS_R4_-_261 |
| pORF_-_985117  | b0929 | ompF |   | RTS_R4_-_262 |
| pORF_-_986808  | b0930 | asnS |   | RTS_R4_-_263 |
| pORF_-_988377  | b0931 | pncB |   | RTS_R4_-_264 |
| pORF_-_992500  | b0933 | ssuB |   | RTS_R4_-_265 |
| pORF_-_994066  | b0935 | ssuD |   | RTS_R4_-_265 |
| pORF_-_1005714 | b0947 | ycbX | U | RTS_R4_-_267 |
| pORF_-_1015175 | b0954 | fabA |   | RTS_R4_-_268 |
| pORF_-_1015762 | b0955 | ycbZ | U | RTS_R4_-_269 |
| pORF_-_1018236 | b0957 | ompA |   | RTS_R4_-_270 |
| pORF_-_1020953 | b0960 | yccS | U | RTS_R4_-_272 |
| pORF_-_1023125 | b0961 | yccF | U | RTS_R4_-_272 |
| pORF_-_1025780 | b0963 | mgsA |   | RTS_R4_-_273 |
| pORF_-_1026334 | b0964 | yccT | U | RTS_R4_-_274 |
| pORF_-_1027627 | b0966 | hspQ |   | RTS_R4_-_275 |
| pORF_-_1028002 | b0967 | yccW | U | RTS_R4_-_276 |

|                |       |      |   |              |
|----------------|-------|------|---|--------------|
| pORF_-_1029562 | b0969 | yccK | U | RTS_R4_-_277 |
| pORF_-_1041253 | b0981 | etk  |   | RTS_R4_-_282 |
| pORF_-_1045072 | b0984 | gfcD | U | RTS_R4_-_282 |
| pORF_-_1047168 | b0985 | gfcC | U | RTS_R4_-_282 |
| pORF_-_1056485 | b0995 | torR |   | RTS_R4_-_284 |
| pORF_-_1061773 | b0999 | cbpM |   | RTS_R4_-_285 |
| pORF_-_1062078 | b1000 | cbpA |   | RTS_R4_-_285 |
| pORF_-_1066087 | b1003 | yccJ | U | RTS_R4_-_286 |
| pORF_-_1066335 | b1004 | wrbA |   | RTS_R4_-_286 |
| pORF_-_1074143 | b1014 | putA |   | RTS_R4_-_289 |
| pORF_-_1087062 | b1023 | pgaB | U |              |
| pORF_-_1089089 | b1024 | pgaA | U |              |
| pORF_-_1093498 | b1026 | insF |   | RTS_R4_-_293 |
| pORF_-_1094361 | b1027 | insE |   | RTS_R4_-_293 |
| pORF_-_1100074 | b1037 | csgG |   | RTS_R4_-_295 |
| pORF_-_1100934 | b1038 | csgF | U | RTS_R4_-_295 |
| pORF_-_1101769 | b1040 | csgD |   | RTS_R4_-_295 |
| pORF_-_1113030 | b1051 | msyB | U | RTS_R4_-_297 |
| pORF_-_1113487 | b1053 | mdtG | U | RTS_R4_-_298 |
| pORF_-_1114885 | b1054 | lpxL |   | RTS_R4_-_299 |
| pORF_-_1117124 | b1056 | yceI | U | RTS_R4_-_300 |
| pORF_-_1118691 | b1059 | solA |   | RTS_R4_-_301 |
| pORF_-_1119924 | b1060 | bssS | U | RTS_R4_-_302 |
| pORF_-_1120465 | b1061 | dinI |   | RTS_R4_-_303 |
| pORF_-_1120784 | b1062 | pyrC |   | RTS_R4_-_304 |
| pORF_-_1121936 | b1063 | yceB | U | RTS_R4_-_305 |
| pORF_-_1122630 | b1064 | grxB |   | RTS_R4_-_305 |
| pORF_-_1123341 | b1065 | mdtH | U |              |
| pORF_-_1128637 | b1070 | flgN |   | RTS_R4_-_306 |
| pORF_-_1129058 | b1071 | flgM |   | RTS_R4_-_306 |
| pORF_-_1140405 | b1084 | rne  |   | RTS_R4_-_307 |
| pORF_-_1145234 | b1087 | yceF | U | RTS_R4_-_308 |
| pORF_-_1158585 | b1102 | fhuE |   | RTS_R4_-_310 |
| pORF_-_1167423 | b1111 | ycfQ | U | RTS_R4_-_311 |
| pORF_-_1168635 | b1113 | ycfS | U | RTS_R4_-_312 |
| pORF_-_1169741 | b1114 | mfd  |   | RTS_R4_-_313 |
| pORF_-_1181006 | b1123 | potD |   | RTS_R4_-_314 |
| pORF_-_1183681 | b1126 | potA |   | RTS_R4_-_314 |
| pORF_-_1186342 | b1128 | ycfD | U | RTS_R4_-_315 |
| pORF_-_1187539 | b1129 | phoQ |   | RTS_R4_-_316 |
| pORF_-_1188999 | b1130 | phoP |   | RTS_R4_-_316 |
| pORF_-_1189839 | b1131 | purB |   | RTS_R4_-_317 |
| pORF_-_1191213 | b1132 | hflD | U | RTS_R4_-_317 |
| pORF_-_1191890 | b1133 | mnmA |   | RTS_R4_-_317 |
| pORF_-_1193050 | b1134 | nudJ |   | RTS_R4_-_318 |
| pORF_-_1196756 | b1138 | ymfE | U |              |
| pORF_-_1198902 | b1140 | intE | U | RTS_R4_-_319 |
| pORF_-_1201482 | b1145 | ymfK |   | RTS_R4_-_321 |
| pORF_-_1212551 | b1162 | ycgE | U | RTS_R4_-_325 |
| pORF_-_1221528 | b1171 | ymgD | U | RTS_R4_-_327 |
| pORF_-_1221867 | b1172 | ymgG | U | RTS_R4_-_327 |
| pORF_-_1223502 | b1174 | minE |   | RTS_R4_-_328 |
| pORF_-_1223772 | b1175 | minD |   | RTS_R4_-_328 |
| pORF_-_1224608 | b1176 | minC |   | RTS_R4_-_328 |
| pORF_-_1226294 | b1178 | ycgK | U | RTS_R4_-_330 |
| pORF_-_1232114 |       |      |   | RTS_R4_-_332 |
| pORF_-_1232399 | b1186 | nhaB |   | RTS_R4_-_333 |
| pORF_-_1234932 | b1188 | ycgB | U | RTS_R4_-_334 |
| pORF_-_1239558 | b1191 | cvrA | U | RTS_R4_-_335 |
| pORF_-_1241389 | b1192 | ldcA |   | RTS_R4_-_335 |
| pORF_-_1243016 | b1194 | ycgR |   | RTS_R4_-_336 |
| pORF_-_1244902 | b1197 | treA |   | RTS_R4_-_337 |
| pORF_-_1246919 | b1198 | dhaM | U | RTS_R4_-_338 |



|                |       |      |   |              |
|----------------|-------|------|---|--------------|
| pORF_-_1248348 | b1199 | dhaL |   | RTS_R4_-_338 |
| pORF_-_1248991 | b1200 | dhaK |   | RTS_R4_-_338 |
| pORF_-_1252308 | b1202 | ycgV | U | RTS_R4_-_339 |
| pORF_-_1255944 | b1203 | ychF | U | RTS_R4_-_340 |
| pORF_-_1257152 | b1204 | pth  |   | RTS_R4_-_341 |
| pORF_-_1258347 | b1206 | ychM | U | RTS_R4_-_342 |
| pORF_-_1260151 | b1207 | prs  |   | RTS_R4_-_343 |
| pORF_-_1261249 | b1208 | ispE |   | RTS_R4_-_344 |
| pORF_-_1262100 | b1209 | loiB |   | RTS_R4_-_344 |
| pORF_-_1272469 | b1219 | ychN | U | RTS_R4_-_352 |
| pORF_-_1274402 | b1221 | narL |   | RTS_R4_-_353 |
| pORF_-_1275045 | b1222 | narX |   | RTS_R4_-_353 |
| pORF_-_1287005 | b1232 | purU |   | RTS_R4_-_356 |
| pORF_-_1291732 | b1237 | hns  |   | RTS_R4_-_358 |
| pORF_-_1294669 | b1241 | adhE |   | RTS_R4_-_359 |
| pORF_-_1304845 | b1248 | yciU | U | RTS_R4_-_360 |
| pORF_-_1305209 | b1249 | cls  |   | RTS_R4_-_360 |
| pORF_-_1307040 | b1250 | kch  |   | RTS_R4_-_361 |
| pORF_-_1308593 | b1251 | yciI | U | RTS_R4_-_362 |
| pORF_-_1309872 | b1253 | yciA | U | RTS_R4_-_363 |
| pORF_-_1312742 | b1257 | yciE | U | RTS_R4_-_365 |
| pORF_-_1313294 | b1258 | yciF | U | RTS_R4_-_365 |
| pORF_-_1313880 | b1259 | yciG | U | RTS_R4_-_365 |
| pORF_-_1314440 | b1260 | trpA |   | RTS_R4_-_366 |
| pORF_-_1315246 | b1261 | trpB |   | RTS_R4_-_366 |
| pORF_-_1316451 | b1262 | trpC |   | RTS_R4_-_366 |
| pORF_-_1317813 | b1263 | trpD |   | RTS_R4_-_367 |
| pORF_-_1319408 | b1264 | trpE |   | RTS_R4_-_367 |
| pORF_-_1325791 | b1270 | btuR |   | RTS_R4_-_368 |
| pORF_-_1326378 | b1271 | yciK | U | RTS_R4_-_368 |
| pORF_-_1328441 | b1273 | yciN | U | RTS_R4_-_369 |
| pORF_-_1336594 | b1277 | ribA |   | RTS_R4_-_370 |
| pORF_-_1341134 | b1283 | osmB |   | RTS_R4_-_371 |
| pORF_-_1341621 | b1284 | yciT | U | RTS_R4_-_372 |
| pORF_-_1342460 | b4596 | yciZ | U | RTS_R4_-_373 |
| pORF_-_1345002 | b1286 | rnb  |   | RTS_R4_-_375 |
| pORF_-_1347004 | b1287 | yciW | U | RTS_R4_-_376 |
| pORF_-_1348275 | b1288 | fabI |   | RTS_R4_-_377 |
| pORF_-_1349852 | b1290 | sapF | U | RTS_R4_-_378 |
| pORF_-_1350660 | b1291 | sapD | U | RTS_R4_-_378 |
| pORF_-_1352529 | b1293 | sapB | U | RTS_R4_-_378 |
| pORF_-_1353491 | b1294 | sapA | U | RTS_R4_-_379 |
| pORF_-_1355447 | b1295 | ymjA | U | RTS_R4_-_380 |
| pORF_-_1355826 | b1296 | puuP |   | RTS_R4_-_381 |
| pORF_-_1357514 | b1297 | puuA |   | RTS_R4_-_381 |
| pORF_-_1364959 | b1303 | pspF |   | RTS_R4_-_382 |
| pORF_-_1386329 | b1324 | tpx  |   | RTS_R4_-_384 |
| pORF_-_1387894 | b1326 | mpaA |   | RTS_R4_-_385 |
| pORF_-_1392915 | b1330 | ynaI | U | RTS_R4_-_387 |
| pORF_-_1395696 | b1333 | uspE |   | RTS_R4_-_388 |
| pORF_-_1396798 | b1334 | fnr  |   | RTS_R4_-_389 |
| pORF_-_1404587 | b1341 | ydaM | U | RTS_R4_-_393 |
| pORF_-_1409037 | b1344 | ttcA | U | RTS_R4_-_395 |
| pORF_-_1412810 | b1350 | recE |   | RTS_R4_-_396 |
| pORF_-_1417789 | b1356 | racR | U | RTS_R4_-_397 |
| pORF_-_1425770 | b1370 | insH |   | RTS_R4_-_400 |
| pORF_-_1431108 | b1374 | pinR | U |              |
| pORF_-_1433209 | b1376 | uspF |   | RTS_R4_-_402 |
| pORF_-_1433784 | b1377 | ompN |   |              |
| pORF_-_1435284 | b1378 | ydbK | U | RTS_R4_-_403 |
| pORF_-_1439345 | b1379 | hslJ |   | RTS_R4_-_404 |
| pORF_-_1439878 | b1380 | ldhA |   | RTS_R4_-_405 |
| pORF_-_1449621 | b1387 | maoC |   | RTS_R4_-_408 |

|                |       |      |   |              |
|----------------|-------|------|---|--------------|
| pORF_-_1480279 | b1412 | azoR |   | RTS_R4_-_410 |
| pORF_-_1487985 | b4493 | gapC | U | RTS_R4_-_411 |
| pORF_-_1488621 |       |      |   | RTS_R4_-_411 |
| pORF_-_1492172 | b1422 | ydcI | U | RTS_R4_-_413 |
| pORF_-_1518987 | b1451 | yncD | U | RTS_R4_-_419 |
| pORF_-_1522505 | b1453 | ansP |   | RTS_R4_-_420 |
| pORF_-_1531306 | b1462 | yddH | U | RTS_R4_-_421 |
| pORF_-_1532989 | b1464 | yddE | U | RTS_R4_-_422 |
| pORF_-_1534638 | b1466 | narW |   | RTS_R4_-_423 |
| pORF_-_1536874 | b1468 | narZ |   | RTS_R4_-_423 |
| pORF_-_1542782 | b1471 | yddK | U |              |
| pORF_-_1543762 | b1472 | yddL | U |              |
| pORF_-_1550422 | b1477 | yddM | U | RTS_R4_-_425 |
| pORF_-_1550852 | b1478 | adhP |   | RTS_R4_-_426 |
| pORF_-_1551996 | b1479 | maeA |   | RTS_R4_-_427 |
| pORF_-_1553850 | b1480 | sra  |   | RTS_R4_-_428 |
| pORF_-_1556055 | b1484 | ddpD |   | RTS_R4_-_430 |
| pORF_-_1558955 | b1487 | ddpA |   | RTS_R4_-_430 |
| pORF_-_1563782 | b1490 | yddV | U | RTS_R4_-_431 |
| pORF_-_1566978 | b1492 | gadC | U | RTS_R4_-_433 |
| pORF_-_1568669 | b1493 | gadB |   | RTS_R4_-_434 |
| pORF_-_1570431 | b1494 | pqqL | U | RTS_R4_-_435 |
| pORF_-_1573271 | b1495 | yddB | U |              |
| pORF_-_1578866 | b1498 | ydeN | U |              |
| pORF_-_1582231 | b1501 | ydeP | U | RTS_R4_-_436 |
| pORF_-_1588878 | b1507 | hipA |   | RTS_R4_-_439 |
| pORF_-_1592133 | b1510 | ydeK | U | RTS_R4_-_440 |
| pORF_-_1596641 | b1511 | lsrK |   | RTS_R4_-_441 |
| pORF_-_1598312 | b1512 | lsrR |   | RTS_R4_-_441 |
| pORF_-_1607253 | b1521 | uxaB |   | RTS_R4_-_443 |
| pORF_-_1610349 | b1524 | yneH | U | RTS_R4_-_444 |
| pORF_-_1611339 | b1525 | sad  | U | RTS_R4_-_445 |
| pORF_-_1622129 | b1536 | ydeI | U | RTS_R4_-_450 |
| pORF_-_1623359 | b1538 | dcp  |   | RTS_R4_-_451 |
| pORF_-_1635633 | b1550 | gnsB | U | RTS_R4_-_456 |
| pORF_-_1636479 | b1552 | cspI |   |              |
| pORF_-_1637054 | b1553 | ydfP | U |              |
| pORF_-_1639363 | b1557 | cspB |   | RTS_R4_-_457 |
| pORF_-_1643657 | b1564 | relB |   | RTS_R4_-_459 |
| pORF_-_1650920 | b1580 | rspB | U |              |
| pORF_-_1664548 | b1593 | ynfK | U | RTS_R4_-_465 |
| pORF_-_1672996 | b1602 | pntB |   | RTS_R4_-_471 |
| pORF_-_1674395 | b1603 | pntA |   | RTS_R4_-_471 |
| pORF_-_1683209 | b1611 | fumC |   | RTS_R4_-_474 |
| pORF_-_1684755 | b1612 | fumA |   | RTS_R4_-_475 |
| pORF_-_1694486 | b1618 | uidR |   | RTS_R4_-_477 |
| pORF_-_1695297 | b1619 | hdhA |   | RTS_R4_-_478 |
| pORF_-_1701292 | b1624 | ydgJ | U | RTS_R4_-_480 |
| pORF_-_1713050 | b1636 | pdxY |   | RTS_R4_-_482 |
| pORF_-_1713972 | b1637 | tyrS |   | RTS_R4_-_483 |
| pORF_-_1715375 | b1638 | pdxH |   | RTS_R4_-_484 |
| pORF_-_1716517 | b1640 | anmK | U | RTS_R4_-_486 |
| pORF_-_1718414 | b1642 | slyA |   | RTS_R4_-_487 |
| pORF_-_1722158 | b1646 | sodC |   | RTS_R4_-_489 |
| pORF_-_1722760 | b1647 | ydhF | U | RTS_R4_-_490 |
| pORF_-_1731778 | b1654 | grxD | U | RTS_R4_-_492 |
| pORF_-_1734145 | b1657 | ydhP | U | RTS_R4_-_493 |
| pORF_-_1740625 | b1662 | ribC |   | RTS_R4_-_496 |
| pORF_-_1742895 | b1664 | ydhQ | U | RTS_R4_-_497 |
| pORF_-_1749752 | b1673 | ydhV | U | RTS_R4_-_498 |
| pORF_-_1752956 | b1675 | ydhZ | U | RTS_R4_-_499 |
| pORF_-_1755745 | b1678 | ynhG | U | RTS_R4_-_501 |
| pORF_-_1756898 | b1679 | sufE |   | RTS_R4_-_502 |

|                |       |      |   |              |
|----------------|-------|------|---|--------------|
| pORF_-_1757327 | b1680 | sufS |   | RTS_R4_-_502 |
| pORF_-_1758544 | b1681 | sufD |   | RTS_R4_-_502 |
| pORF_-_1759790 | b1682 | sufC |   | RTS_R4_-_502 |
| pORF_-_1760546 | b1683 | sufB |   | RTS_R4_-_502 |
| pORF_-_1762042 | b1684 | sufA |   | RTS_R4_-_502 |
| pORF_-_1762958 | b1685 | ydiH | U | RTS_R4_-_504 |
| pORF_-_1763246 | b1686 | ydiI | U | RTS_R4_-_505 |
| pORF_-_1763653 | b1687 | ydiJ | U | RTS_R4_-_505 |
| pORF_-_1782758 | b1702 | pps  |   | RTS_R4_-_507 |
| pORF_-_1787832 | b1706 | ydiU | U | RTS_R4_-_508 |
| pORF_-_1790833 | b1709 | btuD |   | RTS_R4_-_511 |
| pORF_-_1791582 | b1710 | btuE | U | RTS_R4_-_511 |
| pORF_-_1793277 | b1712 | ihfA |   | RTS_R4_-_513 |
| pORF_-_1793581 | b1713 | pheT |   | RTS_R4_-_514 |
| pORF_-_1795983 | b1714 | pheS |   | RTS_R4_-_514 |
| pORF_-_1797417 | b1716 | rplT |   | RTS_R4_-_515 |
| pORF_-_1797826 | b1717 | rpmI |   | RTS_R4_-_516 |
| pORF_-_1798120 | b1718 | infC |   | RTS_R4_-_517 |
| pORF_-_1798666 | b1719 | thrS |   | RTS_R4_-_518 |
| pORF_-_1803349 | b1722 | ydiY | U | RTS_R4_-_519 |
| pORF_-_1806721 | b1726 | yniB | U | RTS_R4_-_520 |
| pORF_-_1817479 | b1736 | chbA |   | RTS_R4_-_523 |
| pORF_-_1817880 | b1737 | chbC |   | RTS_R4_-_523 |
| pORF_-_1819323 | b1738 | chbB |   | RTS_R4_-_523 |
| pORF_-_1819942 | b1739 | osmE |   | RTS_R4_-_524 |
| pORF_-_1823164 | b1743 | spy  |   | RTS_R4_-_526 |
| pORF_-_1824940 | b1745 | astB |   | RTS_R4_-_527 |
| pORF_-_1826280 | b1746 | astD |   | RTS_R4_-_527 |
| pORF_-_1827755 | b1747 | astA |   | RTS_R4_-_527 |
| pORF_-_1828786 | b1748 | astC |   | RTS_R4_-_527 |
| pORF_-_1843023 | b1763 | topB |   | RTS_R4_-_532 |
| pORF_-_1844989 | b1764 | selD |   | RTS_R4_-_532 |
| pORF_-_1846149 | b1765 | ydjA | U | RTS_R4_-_533 |
| pORF_-_1852120 | b1770 | ydjF | U | RTS_R4_-_534 |
| pORF_-_1853015 | b1771 | ydjG | U |              |
| pORF_-_1854005 | b1772 | ydjH | U |              |
| pORF_-_1858280 | b1776 | ydjL | U |              |
| pORF_-_1859726 | b1777 | yeaC | U | RTS_R4_-_535 |
| pORF_-_1860040 | b1778 | msrB |   | RTS_R4_-_535 |
| pORF_-_1863750 | b1782 | mipA |   | RTS_R4_-_537 |
| pORF_-_1878145 | b1798 | leuE |   | RTS_R4_-_542 |
| pORF_-_1886085 | b1805 | fadD |   | RTS_R4_-_545 |
| pORF_-_1887975 | b1806 | yeaY | U | RTS_R4_-_546 |
| pORF_-_1888596 | b1807 | yeaZ | U | RTS_R4_-_547 |
| pORF_-_1892576 | b1811 | yoaH | U | RTS_R4_-_549 |
| pORF_-_1898053 | b1816 | yoaE | U | RTS_R4_-_552 |
| pORF_-_1904275 | b1822 | rrmA |   | RTS_R4_-_553 |
| pORF_-_1905250 | b1823 | cspC |   | RTS_R4_-_554 |
| pORF_-_1907332 | b1827 | kdgR | U | RTS_R4_-_556 |
| pORF_-_1909719 | b1829 | htpX | U | RTS_R4_-_557 |
| pORF_-_1910792 | b1830 | prc  |   | RTS_R4_-_558 |
| pORF_-_1912860 | b1831 | proQ | U | RTS_R4_-_558 |
| pORF_-_1913655 | b1832 | yebR |   | RTS_R4_-_559 |
| pORF_-_1921389 | b1839 | yebY | U | RTS_R4_-_562 |
| pORF_-_1922619 | b1841 | yobA | U | RTS_R4_-_562 |
| pORF_-_1927072 | b1846 | yebE | U | RTS_R4_-_565 |
| pORF_-_1928058 | b1847 | yebF | U | RTS_R4_-_566 |
| pORF_-_1928481 | b1848 | yebG | U | RTS_R4_-_567 |
| pORF_-_1930139 | b1850 | eda  |   | RTS_R4_-_568 |
| pORF_-_1930817 | b1851 | edd  |   | RTS_R4_-_569 |
| pORF_-_1932863 | b1852 | zwf  |   | RTS_R4_-_570 |
| pORF_-_1937246 | b1855 | lpxM |   | RTS_R4_-_571 |
| pORF_-_1938337 | b1856 | yebA | U | RTS_R4_-_572 |

|                |       |      |   |              |
|----------------|-------|------|---|--------------|
| pORF_-_1939675 | b1857 | znuA |   | RTS_R4_-_572 |
| pORF_-_1942370 | b1860 | ruvB |   | RTS_R4_-_573 |
| pORF_-_1943389 | b1861 | ruvA |   | RTS_R4_-_573 |
| pORF_-_1944879 | b1863 | ruvC |   | RTS_R4_-_574 |
| pORF_-_1945435 | b1864 | yebC | U | RTS_R4_-_575 |
| pORF_-_1946774 | b1866 | aspS |   | RTS_R4_-_575 |
| pORF_-_1952602 | b1872 | torZ |   | RTS_R4_-_576 |
| pORF_-_1956544 | b1874 | cutC |   | RTS_R4_-_577 |
| pORF_-_1957304 | b1875 | yecM | U | RTS_R4_-_577 |
| pORF_-_1960996 | b1879 | flhA | U | RTS_R4_-_578 |
| pORF_-_1964417 | b1881 | cheZ |   | RTS_R4_-_578 |
| pORF_-_1965072 | b1882 | cheY |   | RTS_R4_-_578 |
| pORF_-_1965476 | b1883 | cheB |   | RTS_R4_-_578 |
| pORF_-_1967407 | b1885 | tap  |   | RTS_R4_-_578 |
| pORF_-_1969054 | b1886 | tar  |   | RTS_R4_-_578 |
| pORF_-_1970860 | b1887 | cheW |   |              |
| pORF_-_1971384 | b1888 | cheA |   | RTS_R4_-_579 |
| pORF_-_1973353 | b1889 | motB |   | RTS_R4_-_579 |
| pORF_-_1974276 | b1890 | motA |   | RTS_R4_-_579 |
| pORF_-_1975871 | b1892 | flhD |   | RTS_R4_-_580 |
| pORF_-_1978212 | b1896 | otsA |   | RTS_R4_-_582 |
| pORF_-_1979611 | b1897 | otsB |   | RTS_R4_-_583 |
| pORF_-_1980578 | b4460 | araH |   | RTS_R4_-_584 |
| pORF_-_1983163 | b1901 | araF |   | RTS_R4_-_585 |
| pORF_-_1985531 | b4537 | yecJ | U | RTS_R4_-_586 |
| pORF_-_1987275 | b1906 | yecH | U | RTS_R4_-_588 |
| pORF_-_1988978 | b1908 | yecA | U | RTS_R4_-_589 |
| pORF_-_1990898 | b1913 | uvrC |   | RTS_R4_-_592 |
| pORF_-_1992727 | b1914 | uvrY |   | RTS_R4_-_592 |
| pORF_-_1995086 | b1917 | yecC | U | RTS_R4_-_594 |
| pORF_-_1995835 | b1918 | yecS | U | RTS_R4_-_594 |
| pORF_-_1996518 | b1919 | dcyD |   | RTS_R4_-_595 |
| pORF_-_1997609 | b1920 | fliY |   | RTS_R4_-_596 |
| pORF_-_1999094 | b1922 | fliA |   | RTS_R4_-_597 |
| pORF_-_2000134 | b1923 | fliC |   | RTS_R4_-_598 |
| pORF_-_2005701 | b1928 | yedD | U | RTS_R4_-_599 |
| pORF_-_2010724 | b1937 | fliE |   |              |
| pORF_-_2024347 | b1956 | yedQ | U | RTS_R4_-_602 |
| pORF_-_2026473 | b1958 | yedI | U | RTS_R4_-_603 |
| pORF_-_2028923 | b1961 | dcm  |   | RTS_R4_-_604 |
| pORF_-_2030408 | b1962 | yedJ | U | RTS_R4_-_605 |
| pORF_-_2057988 | b1987 | cbl  |   | RTS_R4_-_612 |
| pORF_-_2060415 | b1990 | erfK | U | RTS_R4_-_614 |
| pORF_-_2061412 | b1991 | cobT |   | RTS_R4_-_615 |
| pORF_-_2064329 | b1994 | insH |   | RTS_R4_-_617 |
| pORF_-_2077056 | b2007 | yeeX | U | RTS_R4_-_622 |
| pORF_-_2078813 | b2009 | sbmC |   | RTS_R4_-_623 |
| pORF_-_2079405 | b2010 | dacD |   | RTS_R4_-_624 |
| pORF_-_2082250 | b2012 | yeeD | U | RTS_R4_-_625 |
| pORF_-_2083728 | b2014 | yeeF | U | RTS_R4_-_626 |
| pORF_-_2086328 | b2016 | yeeZ | U | RTS_R4_-_627 |
| pORF_-_2087486 | b2017 | yefM |   | RTS_R4_-_628 |
| pORF_-_2095345 | b2027 | cld  |   | RTS_R4_-_629 |
| pORF_-_2097886 | b2029 | gnd  |   | RTS_R4_-_631 |
| pORF_-_2099919 | b2030 | insH |   | RTS_R4_-_633 |
| pORF_-_2100940 | b4571 | wbbL | U | RTS_R4_-_634 |
| pORF_-_2101415 | b2032 | wbbK |   | RTS_R4_-_634 |
| pORF_-_2102518 | b2033 | wbbJ | U | RTS_R4_-_634 |
| pORF_-_2103089 | b2034 | wbbI | U | RTS_R4_-_635 |
| pORF_-_2105250 | b2036 | glf  |   | RTS_R4_-_635 |
| pORF_-_2107605 | b2038 | rfbC |   | RTS_R4_-_637 |
| pORF_-_2108162 | b2039 | rfbA |   | RTS_R4_-_637 |
| pORF_-_2109101 | b2040 | rfbD |   | RTS_R4_-_638 |

|                 |       |      |   |               |
|-----------------|-------|------|---|---------------|
| pORF_- _2110000 | b2041 | rfbB |   | RTS_R4_- _638 |
| pORF_- _2111458 | b2042 | galF | U | RTS_R4_- _639 |
| pORF_- _2113931 | b2044 | wcaL | U |               |
| pORF_- _2119633 | b2048 | cpsG |   |               |
| pORF_- _2121108 | b2049 | cpsB |   |               |
| pORF_- _2125217 | b2053 | gmd  |   |               |
| pORF_- _2126928 | b2055 | wcaE | U |               |
| pORF_- _2130091 | b2058 | wcaB | U |               |
| pORF_- _2137783 | b2064 | asmA | U | RTS_R4_- _640 |
| pORF_- _2139658 | b2065 | dcd  |   | RTS_R4_- _640 |
| pORF_- _2140331 | b2066 | udk  |   | RTS_R4_- _641 |
| pORF_- _2166013 | b2085 | yegR | U |               |
| pORF_- _2169857 | b2091 | gatD |   | RTS_R4_- _647 |
| pORF_- _2170945 | b2092 | gatC |   | RTS_R4_- _647 |
| pORF_- _2172304 | b2093 | gatB |   | RTS_R4_- _647 |
| pORF_- _2172619 | b2094 | gatA |   | RTS_R4_- _647 |
| pORF_- _2173081 | b2095 | gatZ |   | RTS_R4_- _647 |
| pORF_- _2174372 | b2096 | gatY |   | RTS_R4_- _647 |
| pORF_- _2175534 | b2097 | fbaB |   | RTS_R4_- _648 |
| pORF_- _2180057 | b2101 | yegW | U | RTS_R4_- _649 |
| pORF_- _2180855 | b2102 | yegX | U | RTS_R4_- _650 |
| pORF_- _2181738 | b2103 | thiD |   | RTS_R4_- _650 |
| pORF_- _2182535 | b2104 | thiM |   | RTS_R4_- _650 |
| pORF_- _2183546 | b2105 | rcnR | U | RTS_R4_- _651 |
| pORF_- _2188948 | b2110 | yehC | U | RTS_R4_- _652 |
| pORF_- _2191081 | b2113 | mrp  |   | RTS_R4_- _654 |
| pORF_- _2210265 | b2125 | yehT | U | RTS_R4_- _657 |
| pORF_- _2214503 | b2129 | yehX | U | RTS_R4_- _658 |
| pORF_- _2215422 | b2130 | yehY | U | RTS_R4_- _658 |
| pORF_- _2216586 | b2131 | osmF | U | RTS_R4_- _658 |
| pORF_- _2217714 | b2132 | bgIX |   | RTS_R4_- _659 |
| pORF_- _2221960 | b2134 | pbpG |   | RTS_R4_- _660 |
| pORF_- _2223066 | b2135 | yohC | U | RTS_R4_- _661 |
| pORF_- _2224531 | b2137 | yohF | U | RTS_R4_- _662 |
| pORF_- _2235791 | b2149 | mgIA |   | RTS_R4_- _665 |
| pORF_- _2237372 | b2150 | mgIB |   | RTS_R4_- _665 |
| pORF_- _2239832 | b2152 | yehB | U | RTS_R4_- _666 |
| pORF_- _2241006 | b2153 | folE |   | RTS_R4_- _666 |
| pORF_- _2242800 | b2155 | cirA |   | RTS_R4_- _667 |
| pORF_- _2245085 | b2156 | lysP |   | RTS_R4_- _668 |
| pORF_- _2246759 | b2157 | yehE | U | RTS_R4_- _669 |
| pORF_- _2252267 | b2162 | rihB |   |               |
| pORF_- _2255451 | b2165 | yehN | U |               |
| pORF_- _2257741 | b2167 | fruA |   | RTS_R4_- _671 |
| pORF_- _2259449 | b2168 | fruK |   | RTS_R4_- _671 |
| pORF_- _2260387 | b2169 | fruB |   | RTS_R4_- _671 |
| pORF_- _2275915 | b2181 | yeyG | U | RTS_R4_- _672 |
| pORF_- _2277810 | b2183 | rsuA |   | RTS_R4_- _673 |
| pORF_- _2280962 | b2186 | yeyK |   | RTS_R4_- _674 |
| pORF_- _2287087 | b2192 | insH |   | RTS_R4_- _676 |
| pORF_- _2289380 | b2194 | ccmH |   | RTS_R4_- _677 |
| pORF_- _2295043 | b2201 | ccmA |   | RTS_R4_- _677 |
| pORF_- _2298289 | b2206 | napA |   | RTS_R4_- _678 |
| pORF_- _2303130 | b2210 | mgo  |   | RTS_R4_- _679 |
| pORF_- _2304994 | b2211 | yoyI | U | RTS_R4_- _680 |
| pORF_- _2309668 | b2215 | ompC |   | RTS_R4_- _682 |
| pORF_- _2315049 | b2218 | rscC |   | RTS_R4_- _683 |
| pORF_- _2328321 | b4500 | yfaS | U |               |
| pORF_- _2332358 | b2229 | yfaT | U |               |
| pORF_- _2332978 | b2230 | yfaA | U |               |
| pORF_- _2334815 | b2231 | gyrA |   | RTS_R4_- _684 |
| pORF_- _2338439 | b2233 | yfaL |   | RTS_R4_- _685 |
| pORF_- _2347957 | b2239 | glpQ |   | RTS_R4_- _687 |

|                 |       |      |   |               |
|-----------------|-------|------|---|---------------|
| pORF_- _2349038 | b2240 | glpT |   | RTS_R4_- _687 |
| pORF_- _2360453 | b2249 | yfaY | U | RTS_R4_- _689 |
| pORF_- _2361755 | b2250 | yfaZ | U | RTS_R4_- _690 |
| pORF_- _2363040 | b2252 | ais  | U |               |
| pORF_- _2371294 | b2259 | pmrD |   | RTS_R4_- _691 |
| pORF_- _2371670 | b2260 | menE |   | RTS_R4_- _692 |
| pORF_- _2373022 | b2261 | menC |   | RTS_R4_- _692 |
| pORF_- _2373984 | b2262 | menB |   | RTS_R4_- _692 |
| pORF_- _2375611 | b2264 | menD |   | RTS_R4_- _693 |
| pORF_- _2377370 | b2265 | menF |   | RTS_R4_- _693 |
| pORF_- _2378744 | b2266 | elaB | U | RTS_R4_- _694 |
| pORF_- _2379104 | b2267 | elaA | U | RTS_R4_- _695 |
| pORF_- _2388070 | b2276 | nuoN |   | RTS_R4_- _697 |
| pORF_- _2391227 | b2278 | nuoL |   | RTS_R4_- _697 |
| pORF_- _2393065 | b2279 | nuoK |   | RTS_R4_- _697 |
| pORF_- _2393364 | b2280 | nuoJ |   | RTS_R4_- _697 |
| pORF_- _2393930 | b2281 | nuoI |   | RTS_R4_- _697 |
| pORF_- _2395461 | b2283 | nuoG |   | RTS_R4_- _697 |
| pORF_- _2398240 | b2284 | nuoF |   | RTS_R4_- _697 |
| pORF_- _2399574 | b2285 | nuoE |   | RTS_R4_- _697 |
| pORF_- _2400077 | b2286 | nuoC |   | RTS_R4_- _697 |
| pORF_- _2401973 | b2287 | nuoB |   | RTS_R4_- _697 |
| pORF_- _2402651 | b2288 | nuoA |   | RTS_R4_- _697 |
| pORF_- _2403725 | b2289 | lrhA |   | RTS_R4_- _698 |
| pORF_- _2409461 | b2293 | yfbT | U | RTS_R4_- _700 |
| pORF_- _2410122 | b2294 | yfbU | U | RTS_R4_- _700 |
| pORF_- _2416656 | b2299 | yfcD | U | RTS_R4_- _702 |
| pORF_- _2417256 | b2300 | yfcE | U | RTS_R4_- _702 |
| pORF_- _2417863 | b2301 | yfcF | U | RTS_R4_- _703 |
| pORF_- _2420671 | b2305 | yfcI | U | RTS_R4_- _704 |
| pORF_- _2421758 | b2306 | hisP |   | RTS_R4_- _705 |
| pORF_- _2423252 | b2308 | hisQ |   | RTS_R4_- _705 |
| pORF_- _2424028 | b2309 | hisJ |   | RTS_R4_- _705 |
| pORF_- _2425031 | b2310 | argT |   | RTS_R4_- _706 |
| pORF_- _2426079 | b2311 | ubiX |   | RTS_R4_- _707 |
| pORF_- _2426743 | b2312 | purF |   | RTS_R4_- _707 |
| pORF_- _2429044 | b2314 | dedD | U | RTS_R4_- _708 |
| pORF_- _2429696 | b2315 | folC |   | RTS_R4_- _709 |
| pORF_- _2431034 | b2316 | accD |   | RTS_R4_- _709 |
| pORF_- _2432846 | b2318 | truA |   | RTS_R4_- _711 |
| pORF_- _2433658 | b2319 | usg  | U | RTS_R4_- _711 |
| pORF_- _2434737 | b2320 | pdxB |   | RTS_R4_- _712 |
| pORF_- _2438407 | b2323 | fabB |   | RTS_R4_- _713 |
| pORF_- _2441913 | b2325 | yfcL | U | RTS_R4_- _714 |
| pORF_- _2443582 | b2328 | mepA |   | RTS_R4_- _715 |
| pORF_- _2444410 | b2329 | aroC |   | RTS_R4_- _715 |
| pORF_- _2445530 | b2330 | prmB |   | RTS_R4_- _715 |
| pORF_- _2454349 | b2340 | sixA |   | RTS_R4_- _718 |
| pORF_- _2455037 | b2341 | fadJ |   | RTS_R4_- _719 |
| pORF_- _2457181 | b2342 | fadI |   | RTS_R4_- _719 |
| pORF_- _2457788 |       |      |   | RTS_R4_- _719 |
| pORF_- _2458672 | b2343 | yfcZ | U | RTS_R4_- _720 |
| pORF_- _2462274 | b2346 | vacJ | U | RTS_R4_- _721 |
| pORF_- _2490026 | b2374 | frc  |   |               |
| pORF_- _2491789 | b2375 | yfdX | U |               |
| pORF_- _2495079 | b2379 | yfdZ |   | RTS_R4_- _726 |
| pORF_- _2500012 | b2383 | fryA | U |               |
| pORF_- _2504669 | b2386 | fryC | U |               |
| pORF_- _2506483 | b2388 | glk  |   | RTS_R4_- _727 |
| pORF_- _2509490 | b2392 | mntH |   | RTS_R4_- _728 |
| pORF_- _2513665 | b2395 | yfeA | U | RTS_R4_- _729 |
| pORF_- _2517279 | b2400 | gltX |   | RTS_R4_- _731 |
| pORF_- _2519615 | b2405 | xapR |   | RTS_R4_- _732 |

|                |       |      |   |              |
|----------------|-------|------|---|--------------|
| pORF_-_2526183 | b2411 | ligA |   | RTS_R4_-_734 |
| pORF_-_2528269 | b2412 | zipA |   | RTS_R4_-_735 |
| pORF_-_2534408 | b2418 | pdxK |   | RTS_R4_-_736 |
| pORF_-_2536694 | b2421 | cysM |   | RTS_R4_-_737 |
| pORF_-_2537739 | b2422 | cysA |   | RTS_R4_-_737 |
| pORF_-_2539701 | b2424 | cysU |   | RTS_R4_-_737 |
| pORF_-_2540534 | b2425 | cysP |   | RTS_R4_-_737 |
| pORF_-_2541854 | b2426 | ucpA | U | RTS_R4_-_738 |
| pORF_-_2547668 | b2431 | yfeX | U | RTS_R4_-_740 |
| pORF_-_2548663 | b2432 | yfeY | U | RTS_R4_-_741 |
| pORF_-_2549735 | b2434 | ypeA | U | RTS_R4_-_741 |
| pORF_-_2553763 | b2439 | eutL | U | RTS_R4_-_742 |
| pORF_-_2554432 | b2440 | eutC |   | RTS_R4_-_742 |
| pORF_-_2555340 | b2441 | eutB |   | RTS_R4_-_742 |
| pORF_-_2563503 | b2451 | eutA |   |              |
| pORF_-_2568370 | b2455 | eutE | U |              |
| pORF_-_2570179 | b2457 | eutM | U |              |
| pORF_-_2570511 | b2458 | eutD | U |              |
| pORF_-_2574120 | b2463 | maeB | U | RTS_R4_-_744 |
| pORF_-_2580925 | b2467 | nudK | U | RTS_R4_-_746 |
| pORF_-_2581568 | b2468 | aegA | U |              |
| pORF_-_2591866 | b2474 | ypfI | U | RTS_R4_-_749 |
| pORF_-_2593896 | b2475 | ypfJ | U | RTS_R4_-_749 |
| pORF_-_2594927 | b2476 | purC |   | RTS_R4_-_750 |
| pORF_-_2595853 | b2477 | bamC |   | RTS_R4_-_751 |
| pORF_-_2596904 | b2478 | dapA |   | RTS_R4_-_751 |
| pORF_-_2616097 | b2496 | hda  |   | RTS_R4_-_753 |
| pORF_-_2618268 | b2498 | upp  |   | RTS_R4_-_755 |
| pORF_-_2628980 | b2507 | guaA |   | RTS_R4_-_756 |
| pORF_-_2630626 | b2508 | guaB |   | RTS_R4_-_757 |
| pORF_-_2633621 | b2510 | yfgJ | U | RTS_R4_-_758 |
| pORF_-_2633906 | b2511 | der  | U | RTS_R4_-_759 |
| pORF_-_2635496 | b2512 | bamB |   | RTS_R4_-_760 |
| pORF_-_2636685 | b2513 | yfgM | U | RTS_R4_-_760 |
| pORF_-_2637323 | b2514 | hisS |   | RTS_R4_-_760 |
| pORF_-_2638708 | b2515 | ispG |   | RTS_R4_-_761 |
| pORF_-_2639853 | b2516 | yfgA | U | RTS_R4_-_761 |
| pORF_-_2641151 | b2517 | rlmN | U | RTS_R4_-_762 |
| pORF_-_2642455 | b2518 | ndk  |   | RTS_R4_-_763 |
| pORF_-_2645348 | b2520 | yfhM | U | RTS_R4_-_765 |
| pORF_-_2652179 | b2522 | sseB |   | RTS_R4_-_767 |
| pORF_-_2653097 | b2523 | pepB |   | RTS_R4_-_767 |
| pORF_-_2654558 | b2524 | iscX | U | RTS_R4_-_768 |
| pORF_-_2654770 | b2525 | fdx  |   | RTS_R4_-_768 |
| pORF_-_2655107 | b2526 | hscA |   | RTS_R4_-_768 |
| pORF_-_2656974 | b2527 | hscB |   | RTS_R4_-_769 |
| pORF_-_2657585 | b2528 | iscA |   | RTS_R4_-_769 |
| pORF_-_2657925 | b2529 | iscU |   | RTS_R4_-_770 |
| pORF_-_2658339 | b2530 | iscS |   | RTS_R4_-_770 |
| pORF_-_2659665 | b2531 | iscR |   | RTS_R4_-_770 |
| pORF_-_2660605 | b2532 | trmJ | U | RTS_R4_-_771 |
| pORF_-_2672722 | b2545 | yphC | U | RTS_R4_-_773 |
| pORF_-_2674872 | b2547 | yphE | U | RTS_R4_-_774 |
| pORF_-_2677486 | b2549 | yphG | U | RTS_R4_-_775 |
| pORF_-_2682276 | b2551 | glyA |   | RTS_R4_-_776 |
| pORF_-_2685092 | b2553 | glnB |   | RTS_R4_-_777 |
| pORF_-_2685491 | b2554 | yfhA | U | RTS_R4_-_778 |
| pORF_-_2686815 | b2555 | yfhG | U | RTS_R4_-_778 |
| pORF_-_2687693 | b2556 | yfhK | U | RTS_R4_-_779 |
| pORF_-_2689678 | b2557 | purL |   | RTS_R4_-_780 |
| pORF_-_2698640 | b2563 | acpS |   | RTS_R4_-_783 |
| pORF_-_2699020 | b2564 | pdxJ |   | RTS_R4_-_783 |
| pORF_-_2700503 | b2566 | era  |   | RTS_R4_-_783 |

|                 |       |      |   |               |
|-----------------|-------|------|---|---------------|
| pORF_- _2701405 | b2567 | rnc  |   | RTS_R4_- _783 |
| pORF_- _2702357 | b2568 | lepB |   | RTS_R4_- _784 |
| pORF_- _2703347 | b2569 | lepA |   | RTS_R4_- _784 |
| pORF_- _2705820 | b2571 | rseB |   | RTS_R4_- _785 |
| pORF_- _2706776 | b2572 | rseA |   | RTS_R4_- _785 |
| pORF_- _2707459 | b2573 | rpoE |   | RTS_R4_- _786 |
| pORF_- _2714088 | b2579 | yfiD |   | RTS_R4_- _789 |
| pORF_- _2715513 | b2581 | yfiF | U | RTS_R4_- _790 |
| pORF_- _2722470 | b2587 | kgfP |   | RTS_R4_- _791 |
| pORF_- _2729622 | b2592 | clpB |   | RTS_R4_- _794 |
| pORF_- _2732325 | b2593 | yfiH | U | RTS_R4_- _796 |
| pORF_- _2733053 | b2594 | rluD |   | RTS_R4_- _796 |
| pORF_- _2736970 | b2600 | tyrA |   | RTS_R4_- _798 |
| pORF_- _2738102 | b2601 | aroF |   | RTS_R4_- _798 |
| pORF_- _2742205 | b2606 | rplS |   | RTS_R4_- _799 |
| pORF_- _2742594 | b2607 | trmD |   | RTS_R4_- _799 |
| pORF_- _2743392 | b2608 | rimM |   | RTS_R4_- _799 |
| pORF_- _2743959 | b2609 | rpsP |   | RTS_R4_- _799 |
| pORF_- _2744456 | b2610 | ffh  |   | RTS_R4_- _800 |
| pORF_- _2748137 | b2614 | grpE |   | RTS_R4_- _801 |
| pORF_- _2752030 | b2618 | yfjF | U | RTS_R4_- _802 |
| pORF_- _2769862 | b2638 | yfjU | U | RTS_R4_- _805 |
| pORF_- _2770189 | b2641 | yfjV | U | RTS_R4_- _806 |
| pORF_- _2776168 | b2647 | ypjA |   | RTS_R4_- _807 |
| pORF_- _2794359 | b2665 | ygaU | U | RTS_R4_- _810 |
| pORF_- _2796113 | b2669 | stpA |   | RTS_R4_- _812 |
| pORF_- _2812240 | b2687 | luxS |   | RTS_R4_- _817 |
| pORF_- _2812905 | b2688 | gshA |   | RTS_R4_- _818 |
| pORF_- _2814959 | b2690 | yqaB | U | RTS_R4_- _819 |
| pORF_- _2816983 | b2696 | csrA |   | RTS_R4_- _824 |
| pORF_- _2817403 | b2697 | alaS |   | RTS_R4_- _825 |
| pORF_- _2820161 | b2698 | recX |   |               |
| pORF_- _2820730 | b2699 | recA |   | RTS_R4_- _826 |
| pORF_- _2821871 | b2700 | ygaD | U | RTS_R4_- _827 |
| pORF_- _2822513 | b2701 | mltB |   | RTS_R4_- _828 |
| pORF_- _2833195 | b2712 | hypF |   | RTS_R4_- _830 |
| pORF_- _2836276 | b2714 | ascG |   | RTS_R4_- _831 |
| pORF_- _2840595 | b2717 | hycI |   | RTS_R4_- _832 |
| pORF_- _2845437 | b2723 | hycC |   |               |
| pORF_- _2854475 | b2732 | ygbA | U | RTS_R4_- _833 |
| pORF_- _2864581 | b2741 | rpoS |   | RTS_R4_- _835 |
| pORF_- _2865636 | b2742 | nlpD | U | RTS_R4_- _836 |
| pORF_- _2866915 | b2743 | pcm  |   | RTS_R4_- _837 |
| pORF_- _2867535 | b2744 | surE |   | RTS_R4_- _837 |
| pORF_- _2868277 | b2745 | truD |   | RTS_R4_- _838 |
| pORF_- _2869323 | b2746 | ispF |   | RTS_R4_- _838 |
| pORF_- _2869802 | b2747 | ispD |   | RTS_R4_- _838 |
| pORF_- _2870531 | b2748 | ftsB |   | RTS_R4_- _838 |
| pORF_- _2871409 | b2750 | cysC |   | RTS_R4_- _840 |
| pORF_- _2872014 | b2751 | cysN |   | RTS_R4_- _840 |
| pORF_- _2873443 | b2752 | cysD |   | RTS_R4_- _840 |
| pORF_- _2879073 | b2758 | ygcJ | U | RTS_R4_- _844 |
| pORF_- _2882575 | b2761 | ygcB | U | RTS_R4_- _845 |
| pORF_- _2885600 | b2762 | cysH |   | RTS_R4_- _847 |
| pORF_- _2886409 | b2763 | cysI |   | RTS_R4_- _847 |
| pORF_- _2888121 | b2764 | cysJ |   | RTS_R4_- _847 |
| pORF_- _2895986 | b4463 | ygcU | U | RTS_R4_- _848 |
| pORF_- _2897510 | b2774 | ygcW | U | RTS_R4_- _848 |
| pORF_- _2902769 | b2777 | ygcF | U | RTS_R4_- _850 |
| pORF_- _2904665 | b2779 | eno  |   | RTS_R4_- _851 |
| pORF_- _2906051 | b2780 | pyrG |   | RTS_R4_- _852 |
| pORF_- _2907916 | b2781 | mazG |   | RTS_R4_- _853 |
| pORF_- _2908778 | b2782 | chpA |   | RTS_R4_- _853 |



|                |       |      |   |              |
|----------------|-------|------|---|--------------|
| pORF_-_2909113 | b2783 | chpR |   | RTS_R4_-_853 |
| pORF_-_2909439 | b2784 | relA |   | RTS_R4_-_854 |
| pORF_-_2911721 | b2785 | rumA |   | RTS_R4_-_855 |
| pORF_-_2916067 | b2787 | gudD |   | RTS_R4_-_856 |
| pORF_-_2917428 | b2788 | gudX | U | RTS_R4_-_856 |
| pORF_-_2920557 | b2790 | yqcA | U | RTS_R4_-_857 |
| pORF_-_2921024 | b2791 | truC |   | RTS_R4_-_857 |
| pORF_-_2921806 | b2792 | yqcC | U | RTS_R4_-_857 |
| pORF_-_2922757 | b2793 | syd  | U | RTS_R4_-_859 |
| pORF_-_2929887 | b2799 | fucO |   | RTS_R4_-_860 |
| pORF_-_2938165 | b2806 | ygdE | U | RTS_R4_-_861 |
| pORF_-_2939672 | b2808 | gcvA |   | RTS_R4_-_862 |
| pORF_-_2940940 | b2809 | ygdI | U | RTS_R4_-_863 |
| pORF_-_2943058 | b2812 | ygdL | U | RTS_R4_-_864 |
| pORF_-_2944103 | b2813 | mltA |   | RTS_R4_-_865 |
| pORF_-_2948657 | b2819 | recD |   | RTS_R4_-_867 |
| pORF_-_2950483 | b2820 | recB |   | RTS_R4_-_867 |
| pORF_-_2954018 | b2821 | ptrA |   | RTS_R4_-_868 |
| pORF_-_2957082 | b2822 | recC |   | RTS_R4_-_869 |
| pORF_-_2962383 | b2827 | thyA |   | RTS_R4_-_871 |
| pORF_-_2963184 | b2828 | lgt  |   | RTS_R4_-_871 |
| pORF_-_2964210 | b2829 | ptsP |   | RTS_R4_-_872 |
| pORF_-_2970691 | b2835 | lplT | U | RTS_R4_-_873 |
| pORF_-_2971877 | b2836 | aas  |   | RTS_R4_-_874 |
| pORF_-_2975659 | b2838 | lysA |   | RTS_R4_-_877 |
| pORF_-_2977965 | b2840 | ygeA | U | RTS_R4_-_878 |
| pORF_-_2978786 | b2841 | araE |   | RTS_R4_-_878 |
| pORF_-_2980519 | b2842 | kduD |   | RTS_R4_-_879 |
| pORF_-_2982433 | b2844 | yqeF | U | RTS_R4_-_880 |
| pORF_-_3002030 | b2869 | ygeV | U | RTS_R4_-_885 |
| pORF_-_3010636 | b2875 | yqeB | U | RTS_R4_-_886 |
| pORF_-_3012309 | b2876 | yqeC | U | RTS_R4_-_886 |
| pORF_-_3027034 | b2887 | ygfT | U | RTS_R4_-_889 |
| pORF_-_3031679 | b2890 | lysS |   | RTS_R4_-_890 |
| pORF_-_3033206 |       |      |   | RTS_R4_-_890 |
| pORF_-_3034227 |       |      |   | RTS_R4_-_890 |
| pORF_-_3034395 | b2892 | recJ |   | RTS_R4_-_891 |
| pORF_-_3036134 | b2893 | dsbC |   | RTS_R4_-_891 |
| pORF_-_3036869 | b2894 | xerD |   | RTS_R4_-_891 |
| pORF_-_3038826 | b2897 | ygfY | U | RTS_R4_-_892 |
| pORF_-_3041334 | b2900 | yqfB | U | RTS_R4_-_894 |
| pORF_-_3043180 | b2902 | ygfF | U | RTS_R4_-_895 |
| pORF_-_3044190 | b2903 | gcvP |   | RTS_R4_-_896 |
| pORF_-_3047182 | b2904 | gcvH |   | RTS_R4_-_897 |
| pORF_-_3047595 | b2905 | gcvT |   | RTS_R4_-_897 |
| pORF_-_3049137 | b2906 | visC | U | RTS_R4_-_898 |
| pORF_-_3050362 | b2907 | ubiH |   | RTS_R4_-_898 |
| pORF_-_3051537 | b2908 | pepP |   | RTS_R4_-_898 |
| pORF_-_3052888 | b2909 | ygfB | U | RTS_R4_-_898 |
| pORF_-_3055200 | b2913 | serA |   | RTS_R4_-_899 |
| pORF_-_3056688 | b2914 | rpiA |   | RTS_R4_-_900 |
| pORF_-_3064299 | b2921 | ygfI | U |              |
| pORF_-_3065362 | b2922 | yggE | U | RTS_R4_-_901 |
| pORF_-_3066969 | b2924 | mscS |   | RTS_R4_-_903 |
| pORF_-_3068187 | b2925 | fbaA |   | RTS_R4_-_904 |
| pORF_-_3069481 | b2926 | pgk  |   | RTS_R4_-_905 |
| pORF_-_3070694 | b2927 | epd  |   | RTS_R4_-_906 |
| pORF_-_3071998 | b2928 | yggC | U | RTS_R4_-_907 |
| pORF_-_3075493 | b2933 | cmtA | U |              |
| pORF_-_3077666 | b2935 | tktA |   | RTS_R4_-_908 |
| pORF_-_3080899 | b2937 | speB |   | RTS_R4_-_909 |
| pORF_-_3081957 | b2938 | speA |   | RTS_R4_-_910 |
| pORF_-_3092122 | b2950 | yggR | U |              |

|                |       |      |   |              |
|----------------|-------|------|---|--------------|
| pORF_-_3097704 | b2957 | ansB |   | RTS_R4_-_912 |
| pORF_-_3098926 | b2958 | yggN | U | RTS_R4_-_913 |
| pORF_-_3099829 | b2959 | yggL | U | RTS_R4_-_914 |
| pORF_-_3100155 | b2960 | trmI |   | RTS_R4_-_915 |
| pORF_-_3105042 | b2965 | speC |   | RTS_R4_-_916 |
| pORF_-_3110076 | b2970 | yghF | U | RTS_R4_-_917 |
| pORF_-_3112572 | b4466 | yghJ | U | RTS_R4_-_919 |
| pORF_-_3117619 | b2975 | glcA |   | RTS_R4_-_920 |
| pORF_-_3119656 | b2976 | glcB |   | RTS_R4_-_921 |
| pORF_-_3121849 | b2977 | glcG | U | RTS_R4_-_921 |
| pORF_-_3123492 | b4468 | glcE |   | RTS_R4_-_922 |
| pORF_-_3124544 | b2979 | glcD |   | RTS_R4_-_922 |
| pORF_-_3129363 | b2983 | yghQ | U |              |
| pORF_-_3134685 | b2988 | gsp  |   | RTS_R4_-_923 |
| pORF_-_3139308 | b2994 | hybC |   | RTS_R4_-_924 |
| pORF_-_3148840 | b3005 | exbD |   | RTS_R4_-_929 |
| pORF_-_3149272 | b3006 | exbB |   | RTS_R4_-_929 |
| pORF_-_3156949 | b4469 | ygiQ | U | RTS_R4_-_932 |
| pORF_-_3159279 | b3017 | ftsP |   | RTS_R4_-_933 |
| pORF_-_3160766 | b3018 | plsC |   | RTS_R4_-_934 |
| pORF_-_3161737 | b3019 | parC |   | RTS_R4_-_935 |
| pORF_-_3164133 | b3020 | ygiS | U | RTS_R4_-_936 |
| pORF_-_3165873 | b3021 | ygiT | U | RTS_R4_-_936 |
| pORF_-_3167306 | b3024 | ygiW | U | RTS_R4_-_937 |
| pORF_-_3171526 | b3030 | parE |   | RTS_R4_-_938 |
| pORF_-_3173447 | b3031 | yqiA | U | RTS_R4_-_939 |
| pORF_-_3174028 | b3032 | cpdA |   | RTS_R4_-_939 |
| pORF_-_3175303 | b3034 | nudF |   | RTS_R4_-_940 |
| pORF_-_3181835 | b3041 | ribB |   | RTS_R4_-_943 |
| pORF_-_3189761 | b3049 | glgS | U | RTS_R4_-_945 |
| pORF_-_3193342 | b3052 | rfaE |   | RTS_R4_-_949 |
| pORF_-_3194823 | b3053 | glnE |   | RTS_R4_-_950 |
| pORF_-_3197686 | b3054 | ygiF | U | RTS_R4_-_950 |
| pORF_-_3207552 | b3064 | ygjD | U | RTS_R4_-_954 |
| pORF_-_3212989 | b3068 | mug  |   | RTS_R4_-_955 |
| pORF_-_3213749 | b3070 | yqjH | U | RTS_R4_-_956 |
| pORF_-_3215578 | b3072 | aer  |   | RTS_R4_-_957 |
| pORF_-_3231750 | b3082 | ygjM | U | RTS_R4_-_958 |
| pORF_-_3232761 | b3084 | rlmG | U | RTS_R4_-_959 |
| pORF_-_3239849 | b3091 | uxaA |   | RTS_R4_-_960 |
| pORF_-_3241351 | b3092 | uxaC |   | RTS_R4_-_960 |
| pORF_-_3243363 |       |      |   |              |
| pORF_-_3251340 | b3105 | yhaJ | U | RTS_R4_-_961 |
| pORF_-_3253363 | b4470 | yhaM | U | RTS_R4_-_962 |
| pORF_-_3256307 | b4471 | tdcG |   |              |
| pORF_-_3257743 | b3113 | tdcF | U |              |
| pORF_-_3258146 | b3114 | tdcE |   |              |
| pORF_-_3260474 | b3115 | tdcD |   |              |
| pORF_-_3261708 | b3116 | tdcC |   |              |
| pORF_-_3263061 | b3117 | tdcB |   |              |
| pORF_-_3264149 | b3118 | tdcA |   |              |
| pORF_-_3268647 | b3124 | garK |   | RTS_R4_-_964 |
| pORF_-_3269889 | b3125 | garR |   | RTS_R4_-_964 |
| pORF_-_3275878 | b3131 | agaR |   | RTS_R4_-_965 |
| pORF_-_3290497 | b3146 | yraL | U | RTS_R4_-_967 |
| pORF_-_3295120 | b3151 | yraQ | U | RTS_R4_-_969 |
| pORF_-_3296233 | b3152 | yraR | U | RTS_R4_-_969 |
| pORF_-_3297494 | b3154 | yhbP | U | RTS_R4_-_970 |
| pORF_-_3298277 | b3156 | yhbS | U | RTS_R4_-_971 |
| pORF_-_3303993 | b3162 | deaD |   | RTS_R4_-_973 |
| pORF_-_3306062 | b3163 | nlpI | U | RTS_R4_-_974 |
| pORF_-_3307055 | b3164 | pnp  |   | RTS_R4_-_975 |
| pORF_-_3309437 | b3165 | rpsO |   | RTS_R4_-_976 |

|                |       |      |   |               |
|----------------|-------|------|---|---------------|
| pORF_-_3309855 | b3166 | truB |   | RTS_R4_-_977  |
| pORF_-_3310799 | b3167 | rbfA |   | RTS_R4_-_977  |
| pORF_-_3311364 | b3168 | infB | U | RTS_R4_-_978  |
| pORF_-_3314061 | b3169 | nusA |   | RTS_R4_-_978  |
| pORF_-_3315576 | b3170 | yhbC | U | RTS_R4_-_978  |
| pORF_-_3318010 | b3173 | yhbX | U |               |
| pORF_-_3320195 | b3175 | secG |   | RTS_R4_-_980  |
| pORF_-_3320755 | b3176 | glmM |   | RTS_R4_-_981  |
| pORF_-_3322085 | b3177 | folP |   | RTS_R4_-_982  |
| pORF_-_3323023 | b3178 | hflB |   | RTS_R4_-_983  |
| pORF_-_3325057 | b3179 | rrmJ |   | RTS_R4_-_984  |
| pORF_-_3326261 | b3181 | greA |   | RTS_R4_-_985  |
| pORF_-_3328604 | b3183 | obgE |   | RTS_R4_-_986  |
| pORF_-_3329792 | b3184 | yhbE | U | RTS_R4_-_987  |
| pORF_-_3330884 | b3185 | rpmA |   | RTS_R4_-_988  |
| pORF_-_3331162 | b3186 | rplU |   | RTS_R4_-_988  |
| pORF_-_3333257 | b3189 | murA |   | RTS_R4_-_989  |
| pORF_-_3334571 | b3190 | yrbA | U | RTS_R4_-_990  |
| pORF_-_3334985 | b3191 | yrbB | U | RTS_R4_-_991  |
| pORF_-_3335278 | b3192 | yrbC | U | RTS_R4_-_991  |
| pORF_-_3335932 | b3193 | yrbD | U | RTS_R4_-_992  |
| pORF_-_3336488 | b3194 | yrbE | U | RTS_R4_-_992  |
| pORF_-_3337278 | b3195 | yrbF | U | RTS_R4_-_992  |
| pORF_-_3347828 | b3209 | elbB |   | RTS_R4_-_993  |
| pORF_-_3348711 | b3210 | arcB |   | RTS_R4_-_994  |
| pORF_-_3363724 | b3218 | insH |   | RTS_R4_-_997  |
| pORF_-_3367497 | b3222 | nanK | U | RTS_R4_-_999  |
| pORF_-_3368369 | b3223 | nanE | U | RTS_R4_-_999  |
| pORF_-_3369106 | b3224 | nanT |   | RTS_R4_-_999  |
| pORF_-_3370705 | b3225 | nanA |   | RTS_R4_-_999  |
| pORF_-_3371720 | b3226 | nanR |   | RTS_R4_-_1000 |
| pORF_-_3374301 | b3228 | sspB |   | RTS_R4_-_1001 |
| pORF_-_3374804 | b3229 | sspA |   | RTS_R4_-_1001 |
| pORF_-_3375837 | b3230 | rpsI |   | RTS_R4_-_1002 |
| pORF_-_3376245 | b3231 | rplM |   | RTS_R4_-_1002 |
| pORF_-_3376892 | b3232 | yhcM | U | RTS_R4_-_1003 |
| pORF_-_3381352 | b3236 | mdh  |   | RTS_R4_-_1004 |
| pORF_-_3383879 | b3239 | yhcO | U | RTS_R4_-_1005 |
| pORF_-_3388605 | b3244 | tldD | U | RTS_R4_-_1007 |
| pORF_-_3390480 | b4472 | yhdP | U | RTS_R4_-_1008 |
| pORF_-_3394348 | b3247 | rng  |   | RTS_R4_-_1008 |
| pORF_-_3395807 | b3248 | yhdE | U | RTS_R4_-_1009 |
| pORF_-_3396897 | b3250 | mreC |   | RTS_R4_-_1010 |
| pORF_-_3398066 | b3251 | mreB |   | RTS_R4_-_1010 |
| pORF_-_3399414 | b3252 | csrD | U | RTS_R4_-_1011 |
| pORF_-_3428042 | b3281 | aroE |   | RTS_R4_-_1014 |
| pORF_-_3428865 | b3282 | rimN | U | RTS_R4_-_1015 |
| pORF_-_3429442 | b3283 | yrdD | U | RTS_R4_-_1015 |
| pORF_-_3437638 | b3294 | rplQ |   | RTS_R4_-_1019 |
| pORF_-_3438062 | b3295 | rpoA |   | RTS_R4_-_1019 |
| pORF_-_3439077 | b3296 | rpsD |   | RTS_R4_-_1019 |
| pORF_-_3439731 | b3297 | rpsK |   | RTS_R4_-_1019 |
| pORF_-_3440137 | b3298 | rpsM |   | RTS_R4_-_1019 |
| pORF_-_3440640 | b3299 | rpmJ |   | RTS_R4_-_1019 |
| pORF_-_3440788 | b3300 | secY |   | RTS_R4_-_1020 |
| pORF_-_3442127 | b3301 | rplO |   | RTS_R4_-_1020 |
| pORF_-_3442565 | b3302 | rpmD |   | RTS_R4_-_1020 |
| pORF_-_3442748 | b3303 | rpsE |   | RTS_R4_-_1020 |
| pORF_-_3443266 | b3304 | rplR |   | RTS_R4_-_1020 |
| pORF_-_3443629 | b3305 | rplF |   | RTS_R4_-_1020 |
| pORF_-_3444175 | b3306 | rpsH |   | RTS_R4_-_1020 |
| pORF_-_3444601 | b3307 | rpsN |   | RTS_R4_-_1020 |
| pORF_-_3444921 | b3308 | rplE |   | RTS_R4_-_1020 |

|                |       |      |   |               |
|----------------|-------|------|---|---------------|
| pORF_-_3445475 | b3309 | rplX |   | RTS_R4_-_1020 |
| pORF_-_3445800 | b3310 | rplN |   | RTS_R4_-_1020 |
| pORF_-_3446336 | b3311 | rpsQ |   | RTS_R4_-_1021 |
| pORF_-_3446590 | b3312 | rpmC |   | RTS_R4_-_1021 |
| pORF_-_3446781 | b3313 | rplP |   | RTS_R4_-_1021 |
| pORF_-_3447204 | b3314 | rpsC |   | RTS_R4_-_1021 |
| pORF_-_3447923 | b3315 | rplV |   | RTS_R4_-_1021 |
| pORF_-_3448270 | b3316 | rpsS |   | RTS_R4_-_1021 |
| pORF_-_3448565 | b3317 | rplB |   | RTS_R4_-_1021 |
| pORF_-_3449404 | b3318 | rplW |   | RTS_R4_-_1021 |
| pORF_-_3449703 | b3319 | rplD |   | RTS_R4_-_1021 |
| pORF_-_3450319 | b3320 | rplC |   | RTS_R4_-_1021 |
| pORF_-_3450981 | b3321 | rpsJ |   | RTS_R4_-_1021 |
| pORF_-_3451951 | b3323 | gspA |   | RTS_R4_-_1022 |
| pORF_-_3464271 | b3336 | bfr  |   | RTS_R4_-_1023 |
| pORF_-_3468167 | b3339 | tufA |   | RTS_R4_-_1026 |
| pORF_-_3469422 | b3340 | fusA |   | RTS_R4_-_1027 |
| pORF_-_3471564 | b3341 | rpsG |   | RTS_R4_-_1027 |
| pORF_-_3472200 | b3342 | rpsL |   | RTS_R4_-_1027 |
| pORF_-_3472700 | b3343 | yheL | U | RTS_R4_-_1028 |
| pORF_-_3472995 | b3344 | yheM | U | RTS_R4_-_1028 |
| pORF_-_3473354 | b3345 | yheN | U | RTS_R4_-_1028 |
| pORF_-_3473740 | b3346 | yheO | U | RTS_R4_-_1028 |
| pORF_-_3474629 | b3347 | fkpA |   | RTS_R4_-_1029 |
| pORF_-_3475929 | b3349 | slyD |   | RTS_R4_-_1030 |
| pORF_-_3483436 | b3356 | yhfA | U | RTS_R4_-_1032 |
| pORF_-_3486982 | b3359 | argD |   | RTS_R4_-_1033 |
| pORF_-_3488288 | b3360 | pabA |   | RTS_R4_-_1034 |
| pORF_-_3488883 | b3361 | fic  |   | RTS_R4_-_1034 |
| pORF_-_3489475 | b3362 | yhfG | U | RTS_R4_-_1034 |
| pORF_-_3489747 | b3363 | ppiA |   | RTS_R4_-_1035 |
| pORF_-_3504054 | b3377 | yhfT | U | RTS_R4_-_1037 |
| pORF_-_3510656 | b3384 | trpS |   | RTS_R4_-_1038 |
| pORF_-_3511653 | b3385 | gph  |   | RTS_R4_-_1039 |
| pORF_-_3512404 | b3386 | rpe  |   | RTS_R4_-_1039 |
| pORF_-_3513099 | b3387 | dam  |   | RTS_R4_-_1040 |
| pORF_-_3514042 | b3388 | damX | U | RTS_R4_-_1041 |
| pORF_-_3515420 | b3389 | aroB |   | RTS_R4_-_1042 |
| pORF_-_3516565 | b3390 | aroK |   | RTS_R4_-_1042 |
| pORF_-_3523611 | b3397 | nudE |   | RTS_R4_-_1044 |
| pORF_-_3528737 | b3402 | yhgE | U | RTS_R4_-_1045 |
| pORF_-_3532538 | b3404 | envZ |   | RTS_R4_-_1046 |
| pORF_-_3533887 | b3405 | ompR |   | RTS_R4_-_1046 |
| pORF_-_3542096 | b3412 | bioH |   | RTS_R4_-_1048 |
| pORF_-_3546008 | b3416 | malQ |   | RTS_R4_-_1049 |
| pORF_-_3548102 | b3417 | malP |   | RTS_R4_-_1049 |
| pORF_-_3557870 | b3423 | glpR |   | RTS_R4_-_1051 |
| pORF_-_3558645 | b3424 | glpG | U | RTS_R4_-_1052 |
| pORF_-_3559520 | b3425 | glpE |   | RTS_R4_-_1052 |
| pORF_-_3562157 | b3428 | glgP |   | RTS_R4_-_1054 |
| pORF_-_3564623 | b3429 | glgA |   | RTS_R4_-_1054 |
| pORF_-_3566056 | b3430 | glgC |   | RTS_R4_-_1055 |
| pORF_-_3567369 | b3431 | glgX |   | RTS_R4_-_1056 |
| pORF_-_3569339 | b3432 | glgB |   | RTS_R4_-_1056 |
| pORF_-_3571798 | b3433 | asd  |   | RTS_R4_-_1057 |
| pORF_-_3575088 | b3437 | gntK |   | RTS_R4_-_1058 |
| pORF_-_3575754 | b3438 | gntR |   | RTS_R4_-_1059 |
| pORF_-_3576973 | b3439 | yhhW | U | RTS_R4_-_1060 |
| pORF_-_3577791 | b3440 | yhhX | U | RTS_R4_-_1060 |
| pORF_-_3583104 | b3447 | ggt  |   | RTS_R4_-_1063 |
| pORF_-_3585393 | b3449 | ugpQ |   | RTS_R4_-_1064 |
| pORF_-_3586133 | b3450 | ugpC |   | RTS_R4_-_1064 |
| pORF_-_3589032 | b3453 | ugpB |   | RTS_R4_-_1064 |

|                |       |      |   |               |
|----------------|-------|------|---|---------------|
| pORF_-_3590747 | b3454 | livF |   | RTS_R4_-_1065 |
| pORF_-_3591462 | b3455 | livG |   | RTS_R4_-_1065 |
| pORF_-_3592226 | b3456 | livM |   | RTS_R4_-_1065 |
| pORF_-_3594474 | b3458 | livK |   | RTS_R4_-_1065 |
| pORF_-_3596578 | b3460 | livJ |   | RTS_R4_-_1066 |
| pORF_-_3597952 | b3461 | rpoH |   | RTS_R4_-_1067 |
| pORF_-_3599051 | b3462 | ftsX | U | RTS_R4_-_1068 |
| pORF_-_3600102 | b3463 | ftsE | U | RTS_R4_-_1068 |
| pORF_-_3600773 | b3464 | ftsY | U | RTS_R4_-_1068 |
| pORF_-_3603274 | b3467 | yhhM | U | RTS_R4_-_1069 |
| pORF_-_3606774 | b3470 | sirA | U | RTS_R4_-_1070 |
| pORF_-_3624826 | b3486 | rbbA | U | RTS_R4_-_1073 |
| pORF_-_3627558 | b3487 | yhiI | U | RTS_R4_-_1073 |
| pORF_-_3628991 | b3488 | yhiJ | U |               |
| pORF_-_3634231 | b3492 | yhiN | U | RTS_R4_-_1074 |
| pORF_-_3640403 | b3497 | yhiQ | U | RTS_R4_-_1077 |
| pORF_-_3641163 | b3498 | prlC |   | RTS_R4_-_1077 |
| pORF_-_3650205 | b3505 | insH |   | RTS_R4_-_1080 |
| pORF_-_3653989 | b3509 | hdeB |   | RTS_R4_-_1081 |
| pORF_-_3654431 | b3510 | hdeA |   | RTS_R4_-_1081 |
| pORF_-_3663009 | b3516 | gadX |   | RTS_R4_-_1084 |
| pORF_-_3664203 | b3517 | gadA |   | RTS_R4_-_1085 |
| pORF_-_3665814 | b3518 | yhjA | U | RTS_R4_-_1086 |
| pORF_-_3674313 | b3524 | yhjG | U | RTS_R4_-_1087 |
| pORF_-_3678467 | b3527 | yhjJ | U | RTS_R4_-_1089 |
| pORF_-_3680184 | b3528 | dctA |   | RTS_R4_-_1090 |
| pORF_-_3681653 | b3529 | yhjK | U | RTS_R4_-_1091 |
| pORF_-_3699887 | b3540 | dppF |   | RTS_R4_-_1095 |
| pORF_-_3700888 | b3541 | dppD |   | RTS_R4_-_1095 |
| pORF_-_3701882 | b3542 | dppC |   | RTS_R4_-_1095 |
| pORF_-_3702794 | b3543 | dppB |   | RTS_R4_-_1095 |
| pORF_-_3704121 | b3544 | dppA |   | RTS_R4_-_1095 |
| pORF_-_3706807 | b3546 | eptB | U | RTS_R4_-_1097 |
| pORF_-_3712084 | b3551 | bisC |   | RTS_R4_-_1099 |
| pORF_-_3716357 | b3554 | yiaF | U | RTS_R4_-_1100 |
| pORF_-_3720351 | b3559 | glyS |   | RTS_R4_-_1101 |
| pORF_-_3722430 | b3560 | glyQ |   | RTS_R4_-_1101 |
| pORF_-_3725940 | b3564 | xylB |   | RTS_R4_-_1103 |
| pORF_-_3727466 | b3565 | xylA |   | RTS_R4_-_1103 |
| pORF_-_3739707 | b3574 | yiaJ | U | RTS_R4_-_1106 |
| pORF_-_3749151 | b3584 | yiaT | U | RTS_R4_-_1108 |
| pORF_-_3752996 | b3588 | aldB |   | RTS_R4_-_1109 |
| pORF_-_3754699 | b3589 | yiaY | U |               |
| pORF_-_3756040 | b3590 | selB |   | RTS_R4_-_1110 |
| pORF_-_3757881 | b3591 | selA |   | RTS_R4_-_1110 |
| pORF_-_3759370 | b3592 | yibF | U | RTS_R4_-_1111 |
| pORF_-_3774194 | b4554 | yibT | U | RTS_R4_-_1115 |
| pORF_-_3779764 | b3607 | cysE |   | RTS_R4_-_1116 |
| pORF_-_3780665 | b3608 | gpsA |   | RTS_R4_-_1117 |
| pORF_-_3781684 | b3609 | secB |   | RTS_R4_-_1117 |
| pORF_-_3782214 | b3610 | grxC |   | RTS_R4_-_1118 |
| pORF_-_3782607 | b3611 | yibN | U | RTS_R4_-_1119 |
| pORF_-_3787070 | b3615 | yibD | U |               |
| pORF_-_3788343 | b3616 | tdh  |   | RTS_R4_-_1120 |
| pORF_-_3789378 | b3617 | kbl  |   | RTS_R4_-_1120 |
| pORF_-_3796262 | b3623 | waaU |   | RTS_R4_-_1122 |
| pORF_-_3798290 | b3625 | rfaY |   | RTS_R4_-_1123 |
| pORF_-_3799006 | b3626 | rfaJ |   | RTS_R4_-_1124 |
| pORF_-_3800062 | b3627 | rfaI |   | RTS_R4_-_1124 |
| pORF_-_3801081 | b3628 | rfaB |   | RTS_R4_-_1125 |
| pORF_-_3802204 | b3629 | rfaS |   | RTS_R4_-_1126 |
| pORF_-_3805087 | b3632 | rfaQ |   | RTS_R4_-_1128 |
| pORF_-_3808366 | b3635 | mutM |   | RTS_R4_-_1129 |

|                |       |      |   |               |
|----------------|-------|------|---|---------------|
| pORF_-_3809273 | b3636 | rpmG |   | RTS_R4_-_1130 |
| pORF_-_3809461 | b3637 | rpmB |   | RTS_R4_-_1130 |
| pORF_-_3813150 | b3642 | pyrE |   | RTS_R4_-_1131 |
| pORF_-_3813886 | b3643 | rph  |   | RTS_R4_-_1131 |
| pORF_-_3825483 | b3653 | gltS |   | RTS_R4_-_1132 |
| pORF_-_3837198 | b3661 | nlpA |   | RTS_R4_-_1133 |
| pORF_-_3848159 | b3669 | uhpA |   | RTS_R4_-_1135 |
| pORF_-_3848825 | b3670 | ilvN |   | RTS_R4_-_1135 |
| pORF_-_3849119 | b3671 | ilvB |   | RTS_R4_-_1135 |
| pORF_-_3856424 | b3679 | yidK | U |               |
| pORF_-_3864492 | b3686 | ibpB |   | RTS_R4_-_1139 |
| pORF_-_3865032 | b3687 | ibpA |   | RTS_R4_-_1140 |
| pORF_-_3866085 | b3689 | yidR | U | RTS_R4_-_1141 |
| pORF_-_3869873 | b4478 | dgoD |   | RTS_R4_-_1142 |
| pORF_-_3872494 | b4479 | dgoR | U | RTS_R4_-_1142 |
| pORF_-_3874163 | b3697 | yidA | U | RTS_R4_-_1143 |
| pORF_-_3875090 | b3698 | yidB | U | RTS_R4_-_1144 |
| pORF_-_3875728 | b3699 | gyrB |   | RTS_R4_-_1145 |
| pORF_-_3878171 | b3700 | recF |   | RTS_R4_-_1146 |
| pORF_-_3879244 | b3701 | dnaN |   | RTS_R4_-_1147 |
| pORF_-_3880349 | b3702 | dnaA |   | RTS_R4_-_1147 |
| pORF_-_3893295 | b3714 | yieG | U | RTS_R4_-_1149 |
| pORF_-_3900312 | b3721 | bglB |   |               |
| pORF_-_3903754 | b3723 | bglG |   |               |
| pORF_-_3904876 | b3724 | phoU |   | RTS_R4_-_1150 |
| pORF_-_3905616 | b3725 | pstB |   | RTS_R4_-_1150 |
| pORF_-_3906572 | b3726 | pstA |   | RTS_R4_-_1150 |
| pORF_-_3907462 | b3727 | pstC |   | RTS_R4_-_1150 |
| pORF_-_3908508 | b3728 | pstS |   | RTS_R4_-_1150 |
| pORF_-_3909862 | b3729 | glmS |   | RTS_R4_-_1151 |
| pORF_-_3911853 | b3730 | glmU |   | RTS_R4_-_1151 |
| pORF_-_3913576 | b3731 | atpC |   | RTS_R4_-_1152 |
| pORF_-_3914016 | b3732 | atpD |   | RTS_R4_-_1152 |
| pORF_-_3915425 | b3733 | atpG |   | RTS_R4_-_1152 |
| pORF_-_3916339 | b3734 | atpA |   | RTS_R4_-_1152 |
| pORF_-_3917893 | b3735 | atpH |   | RTS_R4_-_1152 |
| pORF_-_3918441 | b3736 | atpF |   | RTS_R4_-_1152 |
| pORF_-_3918973 | b3737 | atpE |   | RTS_R4_-_1152 |
| pORF_-_3919259 | b3738 | atpB |   | RTS_R4_-_1152 |
| pORF_-_3921080 | b3740 | gidB |   | RTS_R4_-_1153 |
| pORF_-_3921767 | b3741 | mnmG |   | RTS_R4_-_1153 |
| pORF_-_3924035 | b3742 | mioC |   | RTS_R4_-_1154 |
| pORF_-_3924568 | b3743 | asnC |   | RTS_R4_-_1155 |
| pORF_-_3926175 | b3745 | viaA | U | RTS_R4_-_1156 |
| pORF_-_3927620 | b3746 | ravA | U | RTS_R4_-_1157 |
| pORF_-_3938658 | b3755 | yieP | U | RTS_R4_-_1158 |
| pORF_-_3945151 | b4480 | hdfR |   | RTS_R4_-_1159 |
| pORF_-_3957555 | b3775 | ppiC |   | RTS_R4_-_1161 |
| pORF_-_3960768 | b3779 | gpp  |   | RTS_R4_-_1163 |
| pORF_-_3962388 | b3780 | rhIB |   | RTS_R4_-_1163 |
| pORF_-_3984709 | b3802 | hemY | U | RTS_R4_-_1165 |
| pORF_-_3985908 | b3803 | hemX | U | RTS_R4_-_1165 |
| pORF_-_3987111 | b3804 | hemD |   | RTS_R4_-_1166 |
| pORF_-_3987848 | b3805 | hemC |   | RTS_R4_-_1166 |
| pORF_-_3991762 | b3807 | cyaY |   | RTS_R4_-_1167 |
| pORF_-_4002253 | b3820 | yigI | U | RTS_R4_-_1168 |
| pORF_-_4009886 | b3828 | metR |   | RTS_R4_-_1170 |
| pORF_-_4013377 | b3830 | ysgA | U | RTS_R4_-_1171 |
| pORF_-_4022356 | b3842 | rfaH |   | RTS_R4_-_1172 |
| pORF_-_4025632 | b3845 | fadA |   | RTS_R4_-_1173 |
| pORF_-_4026805 | b3846 | fadB |   | RTS_R4_-_1173 |
| pORF_-_4039438 | b3857 | mobA |   | RTS_R4_-_1174 |
| pORF_-_4043693 | b3862 | yihG | U | RTS_R4_-_1175 |

|                |       |      |   |               |
|----------------|-------|------|---|---------------|
| pORF_-_4048156 | b3865 | yihA |   | RTS_R4_-_1176 |
| pORF_-_4051892 | b3868 | glnG |   | RTS_R4_-_1178 |
| pORF_-_4053313 | b3869 | glnL |   | RTS_R4_-_1178 |
| pORF_-_4054648 | b3870 | glnA |   | RTS_R4_-_1179 |
| pORF_-_4065263 | b3878 | yihQ |   |               |
| pORF_-_4078322 | b3891 | fdhE |   | RTS_R4_-_1180 |
| pORF_-_4079248 | b3892 | fdoI |   | RTS_R4_-_1181 |
| pORF_-_4079880 | b3893 | fdoH |   | RTS_R4_-_1181 |
| pORF_-_4080795 | b3894 | fdoG |   | RTS_R4_-_1181 |
| pORF_-_4083258 |       |      |   | RTS_R4_-_1181 |
| pORF_-_4097514 | b3907 | rhaT |   | RTS_R4_-_1182 |
| pORF_-_4101625 | b3911 | cpxA |   | RTS_R4_-_1184 |
| pORF_-_4102995 | b3912 | cpxR |   | RTS_R4_-_1184 |
| pORF_-_4108763 | b3919 | tpiA |   | RTS_R4_-_1185 |
| pORF_-_4111749 | b3924 | fpr  |   | RTS_R4_-_1187 |
| pORF_-_4112592 | b3925 | glpX |   | RTS_R4_-_1188 |
| pORF_-_4113737 | b3926 | glpK |   | RTS_R4_-_1189 |
| pORF_-_4116868 | b3929 | rraA |   | RTS_R4_-_1190 |
| pORF_-_4118439 | b3931 | hslU |   | RTS_R4_-_1192 |
| pORF_-_4119780 | b3932 | hslV |   | RTS_R4_-_1192 |
| pORF_-_4120403 | b3933 | ftsN |   | RTS_R4_-_1193 |
| pORF_-_4121454 | b3934 | cytR |   | RTS_R4_-_1194 |
| pORF_-_4122635 | b3935 | priA |   | RTS_R4_-_1195 |
| pORF_-_4126101 | b3938 | metJ |   | RTS_R4_-_1196 |
| pORF_-_4135063 | b3944 | yijF | U |               |
| pORF_-_4135955 | b3945 | gldA |   | RTS_R4_-_1198 |
| pORF_-_4137069 | b3946 | fsaB |   | RTS_R4_-_1198 |
| pORF_-_4137743 | b3947 | ptsA | U | RTS_R4_-_1198 |
| pORF_-_4146555 | b3955 | yijP | U | RTS_R4_-_1200 |
| pORF_-_4148470 | b3956 | ppc  |   | RTS_R4_-_1201 |
| pORF_-_4151719 | b3957 | argE |   | RTS_R4_-_1202 |
| pORF_-_4157413 | b3962 | sthA |   | RTS_R4_-_1204 |
| pORF_-_4160193 | b3965 | trmA |   | RTS_R4_-_1205 |
| pORF_-_4172099 | b3974 | coaA |   | RTS_R4_-_1207 |
| pORF_-_4188758 | b3990 | thiH |   | RTS_R4_-_1209 |
| pORF_-_4189888 | b3991 | thiG |   | RTS_R4_-_1209 |
| pORF_-_4190660 | b4407 | thiS |   | RTS_R4_-_1209 |
| pORF_-_4190844 | b3992 | thiF |   | RTS_R4_-_1209 |
| pORF_-_4191592 | b3993 | thiE |   | RTS_R4_-_1209 |
| pORF_-_4192227 | b3994 | thiC |   | RTS_R4_-_1209 |
| pORF_-_4194355 | b3995 | rsd  |   | RTS_R4_-_1210 |
| pORF_-_4202665 | b4005 | purD |   | RTS_R4_-_1212 |
| pORF_-_4203966 | b4006 | purH |   | RTS_R4_-_1212 |
| pORF_-_4220827 | b4018 | iclR |   | RTS_R4_-_1214 |
| pORF_-_4227476 | b4021 | pepE |   | RTS_R4_-_1215 |
| pORF_-_4229382 | b4023 | pagB | U | RTS_R4_-_1216 |
| pORF_-_4229907 | b4024 | lysC |   | RTS_R4_-_1217 |
| pORF_-_4238802 | b4031 | xylE |   |               |
| pORF_-_4243252 | b4034 | malE |   | RTS_R4_-_1219 |
| pORF_-_4252066 | b4041 | plsB |   | RTS_R4_-_1220 |
| pORF_-_4257511 | b4046 | zur  |   | RTS_R4_-_1221 |
| pORF_-_4261271 | b4051 | qor  |   | RTS_R4_-_1222 |
| pORF_-_4269072 | b4058 | uvrA |   | RTS_R4_-_1223 |
| pORF_-_4281276 | b4067 | actP |   | RTS_R4_-_1227 |
| pORF_-_4282922 | b4068 | yjch | U | RTS_R4_-_1227 |
| pORF_-_4283436 | b4069 | acs  |   | RTS_R4_-_1227 |
| pORF_-_4294459 | b4078 | yjcO | U | RTS_R4_-_1228 |
| pORF_-_4301101 | b4082 | mdtN | U |               |
| pORF_-_4302635 | b4083 | yjcS | U |               |
| pORF_-_4306512 | b4086 | alsC |   |               |
| pORF_-_4307471 | b4087 | alsA |   |               |
| pORF_-_4309130 | b4088 | alsB |   |               |
| pORF_-_4310124 | b4089 | rpiR |   | RTS_R4_-_1230 |

|                |       |      |   |               |
|----------------|-------|------|---|---------------|
| pORF_- 4315238 | b4096 | phnL |   |               |
| pORF_- 4316029 | b4097 | phnK |   |               |
| pORF_- 4322400 | b4106 | phnC |   |               |
| pORF_- 4323321 | b4107 | yjdN | U | RTS_R4_- 1232 |
| pORF_- 4324422 | b4108 | yjdM | U | RTS_R4_- 1233 |
| pORF_- 4331305 | b4113 | basR |   | RTS_R4_- 1234 |
| pORF_- 4336277 | b4117 | adiA |   |               |
| pORF_- 4343703 | b4122 | fumB |   | RTS_R4_- 1236 |
| pORF_- 4345427 | b4123 | dcuB |   | RTS_R4_- 1236 |
| pORF_- 4347338 | b4124 | dcuR |   | RTS_R4_- 1237 |
| pORF_- 4351223 | b4129 | lysU |   | RTS_R4_- 1239 |
| pORF_- 4354493 | b4131 | cadA |   |               |
| pORF_- 4360756 | b4135 | yjdC | U | RTS_R4_- 1242 |
| pORF_- 4361368 | b4136 | dipZ | U | RTS_R4_- 1243 |
| pORF_- 4363041 | b4137 | cutA |   | RTS_R4_- 1243 |
| pORF_- 4363495 | b4138 | dcuA |   | RTS_R4_- 1244 |
| pORF_- 4364914 | b4139 | aspA |   | RTS_R4_- 1245 |
| pORF_- 4375212 | b4149 | blc  |   | RTS_R4_- 1248 |
| pORF_- 4375834 | b4150 | ampC |   | RTS_R4_- 1249 |
| pORF_- 4377806 | b4153 | frdB |   | RTS_R4_- 1250 |
| pORF_- 4378533 | b4154 | frdA |   | RTS_R4_- 1250 |
| pORF_- 4384070 | b4159 | yjeP | U | RTS_R4_- 1251 |
| pORF_- 4387415 | b4160 | psd  |   | RTS_R4_- 1251 |
| pORF_- 4388480 | b4161 | rsgA |   | RTS_R4_- 1252 |
| pORF_- 4414464 | b4189 | yjfO | U | RTS_R4_- 1254 |
| pORF_- 4415721 | b4191 | ulaR |   | RTS_R4_- 1255 |
| pORF_- 4422539 | b4199 | yjfY | U | RTS_R4_- 1257 |
| pORF_- 4424651 | b4204 | yjfZ | U |               |
| pORF_- 4426102 | b4206 | ytfB | U | RTS_R4_- 1258 |
| pORF_- 4431187 | b4211 | ytfG |   | RTS_R4_- 1261 |
| pORF_- 4432645 | b4213 | cpdB |   | RTS_R4_- 1262 |
| pORF_- 4436731 | b4216 | ytfJ | U | RTS_R4_- 1263 |
| pORF_- 4437895 | b4218 | ytfL | U | RTS_R4_- 1264 |
| pORF_- 4439561 | b4219 | msrA |   | RTS_R4_- 1265 |
| pORF_- 4447145 | b4226 | ppa  |   | RTS_R4_- 1266 |
| pORF_- 4452634 | b4232 | fbp  |   | RTS_R4_- 1267 |
| pORF_- 4455337 | b4234 | yjgA | U | RTS_R4_- 1268 |
| pORF_- 4458545 | b4238 | nrdD |   | RTS_R4_- 1269 |
| pORF_- 4461077 | b4239 | treC |   |               |
| pORF_- 4462782 | b4240 | treB |   | RTS_R4_- 1270 |
| pORF_- 4464322 | b4241 | treR |   | RTS_R4_- 1270 |
| pORF_- 4468550 | b4243 | yjgF |   | RTS_R4_- 1271 |
| pORF_- 4469009 | b4244 | pyrI |   | RTS_R4_- 1272 |
| pORF_- 4469483 | b4245 | pyrB |   | RTS_R4_- 1272 |
| pORF_- 4475330 | b4254 | argI |   | RTS_R4_- 1275 |
| pORF_- 4477057 | b4256 | yjgM | U | RTS_R4_- 1276 |
| pORF_- 4479005 | b4258 | valS |   | RTS_R4_- 1277 |
| pORF_- 4481860 | b4259 | holC |   | RTS_R4_- 1278 |
| pORF_- 4482463 | b4260 | pepA |   | RTS_R4_- 1279 |
| pORF_- 4486584 | b4263 | yjgR | U | RTS_R4_- 1280 |
| pORF_- 4488164 | b4264 | idnR |   | RTS_R4_- 1281 |
| pORF_- 4490610 | b4266 | idnO |   |               |
| pORF_- 4493213 | b4269 | yjgB | U | RTS_R4_- 1282 |
| pORF_- 4509481 | b4288 | fecD |   | RTS_R4_- 1288 |
| pORF_- 4511429 | b4290 | fecB |   | RTS_R4_- 1288 |
| pORF_- 4512376 | b4291 | fecA |   | RTS_R4_- 1289 |
| pORF_- 4517361 | b4295 | yjhU | U | RTS_R4_- 1290 |
| pORF_- 4526134 | b4303 | sgcQ | U | RTS_R4_- 1292 |
| pORF_- 4528278 | b4565 | sgcB | U | RTS_R4_- 1292 |
| pORF_- 4528553 | b4305 | sgcX | U | RTS_R4_- 1292 |
| pORF_- 4535682 | b4310 | nanM | U | RTS_R4_- 1295 |
| pORF_- 4555401 | b4327 | yjiE | U | RTS_R4_- 1297 |
| pORF_- 4556377 | b4328 | iadA |   | RTS_R4_- 1298 |



|                |       |      |   |               |
|----------------|-------|------|---|---------------|
| pORF_-_4558020 | b4330 | yjiH | U | RTS_R4_-_1299 |
| pORF_-_4562722 | b4335 | yjiM | U | RTS_R4_-_1300 |
| pORF_-_4563989 | b4336 | yjiN | U | RTS_R4_-_1300 |
| pORF_-_4574935 | b4345 | mcrC |   |               |
| pORF_-_4575981 | b4346 | mcrB |   | RTS_R4_-_1303 |
| pORF_-_4578091 | b4348 | hsdS |   | RTS_R4_-_1305 |
| pORF_-_4579482 | b4349 | hsdM |   | RTS_R4_-_1305 |
| pORF_-_4581272 | b4350 | hsdR |   | RTS_R4_-_1306 |
| pORF_-_4585932 | b4352 | yjiA | U | RTS_R4_-_1307 |
| pORF_-_4587152 | b4354 | yjiY | U | RTS_R4_-_1308 |
| pORF_-_4592960 | b4357 | yjjM | U | RTS_R4_-_1309 |
| pORF_-_4595173 | b4359 | mdoB |   | RTS_R4_-_1310 |
| pORF_-_4597718 | b4360 | yjjA | U | RTS_R4_-_1311 |
| pORF_-_4598261 | b4361 | dnaC |   | RTS_R4_-_1311 |
| pORF_-_4599001 | b4362 | dnaT |   | RTS_R4_-_1311 |
| pORF_-_4602898 | b4367 | fhuF |   | RTS_R4_-_1313 |
| pORF_-_4604692 | b4371 | rsmC |   | RTS_R4_-_1315 |
| pORF_-_4613538 | b4380 | yjjI | U | RTS_R4_-_1316 |
| pORF_-_4621124 | b4386 | lplA |   | RTS_R4_-_1317 |
| pORF_-_4622168 | b4387 | ytjB | U | RTS_R4_-_1317 |
| pORF_-_4626878 | b4391 | yjjK | U | RTS_R4_-_1318 |
| pORF_-_4631256 | b4394 | yjjX |   | RTS_R4_-_1319 |
| pORF_-_4632464 | b4396 | rob  |   | RTS_R4_-_1320 |
| pORF_-_4637613 | b4401 | arcA |   | RTS_R4_-_1321 |
