# Supplementary material
Source: PubMed Central journal article supplement (PMC3832199)
Supplement: NIHMS251755-supplement-Supplement_Table12.pdf [file NIHMS251755-supplement-Supplement_Table12.pdf]

**Supplementary Table 12: Determination of transcription units architecture and calculation of 5'UTR length**

| TU      | Strand | Start | End   | Len  | MU Assembly | TSS   | Current Annotation  | Assembly | Promoter | Start | 5'UTR Len |
|---------|--------|-------|-------|------|-------------|-------|---------------------|----------|----------|-------|-----------|
| TU-0001 | FWD    | 150   | 5000  | 4850 | MU-1;MU-2   | 148   | thrL;thrA;thrB;thrC |          | thrL     | 190   | 42        |
| TU-0002 | FWD    | 150   | 5000  | 4850 | MU-1;MU-2   | 163   | thrL;thrA;thrB;thrC |          | thrL     | 190   | 27        |
| TU-0003 | FWD    | 150   | 5000  | 4850 | MU-1;MU-2   | 170   | thrL;thrA;thrB;thrC |          | thrL     | 190   | 20        |
| TU-0004 | FWD    | 2600  | 5000  | 2400 | MU-2        | 2688  | thrB;thrC           |          | thrB     | 2801  | 113       |
| TU-0005 | FWD    | 5050  | 5525  | 475  | MU-3        | 5118  | yaaX                |          | yaaX     | 5234  | 116       |
| TU-0006 | FWD    | 8200  | 9200  | 1000 | MU-4        | 8191  | talB                |          | talB     | 8238  | 47        |
| TU-0007 | FWD    | 8200  | 9200  | 1000 | MU-4        | 8198  | talB                |          | talB     | 8238  | 40        |
| TU-0008 | FWD    | 8200  | 9200  | 1000 | MU-4        | 8204  | talB                |          | talB     | 8238  | 34        |
| TU-0009 | FWD    | 8200  | 9200  | 1000 | MU-4        | 8211  | talB                |          | talB     | 8238  | 27        |
| TU-0010 | FWD    | 8200  | 9200  | 1000 | MU-4        | 8230  | talB                |          | talB     | 8238  | 8         |
| TU-0011 | FWD    | 9300  | 10100 | 800  | MU-5        | 9277  | mog                 |          | mog      | 9306  | 29        |
| TU-0012 | FWD    | 12051 | 15326 | 3275 | MU-6;MU-7   | 12048 | dnaK;Tpke11;dnaJ    |          | dnaK     | 12163 | 115       |
| TU-0013 | FWD    | 12051 | 15326 | 3275 | MU-6;MU-7   | 12123 | dnaK;Tpke11;dnaJ    |          | dnaK     | 12163 | 40        |
| TU-0014 | FWD    | 12051 | 15326 | 3275 | MU-6;MU-7   | 12159 | dnaK;Tpke11;dnaJ    |          | dnaK     | 12163 | 4         |
| TU-0015 | FWD    | 12051 | 15326 | 3275 | MU-6;MU-7   | 12142 | dnaK;Tpke11;dnaJ    |          | dnaK     | 12163 | 21        |
| TU-0016 | FWD    | 14076 | 15326 | 1250 | MU-7        | 14052 | Tpke11;dnaJ         |          | Tpke11   | 14080 | 28        |
| TU-0017 | FWD    | 15351 | 16801 | 1450 | MU-8        | 15247 | insL                |          | insL     | 15445 | 198       |
| TU-0018 | FWD    | 15351 | 16801 | 1450 | MU-8        | 15253 | insL                |          | insL     | 15445 | 192       |
| TU-0019 | FWD    | 15351 | 16801 | 1450 | MU-8        | 15276 | insL                |          | insL     | 15445 | 169       |
| TU-0020 | FWD    | 15351 | 16801 | 1450 | MU-8        | 15338 | insL                |          | insL     | 15445 | 107       |
| TU-0021 | FWD    | 16976 | 17051 | 75   | MU-9        | 16959 | sokC                |          | sokC     | 16952 | -7        |
| TU-0022 | FWD    | 17576 | 19701 | 2125 | MU-10       | 17462 | nhaA;nhaR           |          | nhaA     | 17489 | 27        |
| TU-0023 | FWD    | 19801 | 20501 | 700  | MU-11       | 19727 | NT                  |          |          |       |           |
| TU-0024 | FWD    | 19801 | 20501 | 700  | MU-11       | 19742 | NT                  |          |          |       |           |
| TU-0025 | FWD    | 21001 | 21376 | 375  | MU-12       | 20912 | yaaY                |          | yaaY     | 21181 | 269       |
| TU-0026 | FWD    | 21401 | 24976 | 3575 | MU-13       | 21383 | ribF;ileS           |          | ribF     | 21407 | 24        |
| TU-0027 | FWD    | 21401 | 24976 | 3575 | MU-13       | 21395 | ribF;ileS           |          | ribF     | 21407 | 12        |
| TU-0028 | FWD    | 25001 | 25726 | 725  | MU-14       | 24971 | lspA                |          | lspA     | 25207 | 236       |
| TU-0029 | FWD    | 25001 | 25726 | 725  | MU-14       | 25006 | lspA                |          | lspA     | 25207 | 201       |
| TU-0030 | FWD    | 25751 | 28201 | 2450 | MU-15       | 25695 | fkpB;ispH;rihC      |          | fkpB     | 25826 | 131       |
| TU-0031 | FWD    | 25751 | 28201 | 2450 | MU-15       | 25698 | fkpB;ispH;rihC      |          | fkpB     | 25826 | 128       |
| TU-0032 | FWD    | 25751 | 28201 | 2450 | MU-15       | 25701 | fkpB;ispH;rihC      |          | fkpB     | 25826 | 125       |
| TU-0033 | FWD    | 25751 | 28201 | 2450 | MU-15       | 25804 | fkpB;ispH;rihC      |          | fkpB     | 25826 | 22        |
| TU-0034 | FWD    | 28276 | 29201 | 925  | MU-16       | 28289 | dapB                |          | dapB     | 28374 | 85        |
| TU-0035 | FWD    | 28276 | 29201 | 925  | MU-16       | 28343 | dapB                |          | dapB     | 28374 | 31        |
| TU-0036 | FWD    | 29555 | 34055 | 4500 | MU-17       | 29551 | carA;carB           |          | carA     | 29651 | 100       |
| TU-0037 | FWD    | 29555 | 34055 | 4500 | MU-17       | 29620 | carA;carB           |          | carA     | 29651 | 31        |
| TU-0038 | FWD    | 29555 | 34055 | 4500 | MU-17       | 29632 | carA;carB           |          | carA     | 29651 | 19        |
| TU-0039 | FWD    | 34234 | 34784 | 550  | MU-18       | 34226 | caiF                |          | caiF     | 34300 | 74        |
| TU-0040 | FWD    | 34234 | 34784 | 550  | MU-18       | 34273 | caiF                |          | caiF     | 34300 | 27        |
| TU-0041 | FWD    | 42403 | 45750 | 3347 | MU-19       |       | fixA;fixB;fixC;fixX |          | fixA     | 42403 |           |
| TU-0042 | FWD    | 45807 | 47138 | 1331 | MU-20       |       | yaaU                |          | yaaU     | 45807 |           |
| TU-0043 | FWD    | 47234 | 49509 | 2275 | MU-21       | 47215 | kefF;kefC           |          | kefF     | 47246 | 31        |
| TU-0044 | FWD    | 49809 | 50509 | 700  | MU-22       | 49788 | folA                |          | folA     | 49823 | 35        |

|         |     |        |        |                                                             |                                                                                       |      |        |      |
|---------|-----|--------|--------|-------------------------------------------------------------|---------------------------------------------------------------------------------------|------|--------|------|
| TU-0045 | FWD | 49809  | 50509  | 700 MU-22                                                   | 49799 folA                                                                            | folA | 49823  | 24   |
| TU-0046 | FWD | 57284  | 58734  | 1450 MU-23                                                  | 57259 djIA                                                                            | djIA | 57364  | 105  |
| TU-0047 | FWD | 57284  | 58734  | 1450 MU-23                                                  | 57261 djIA                                                                            | djIA | 57364  | 103  |
| TU-0048 | FWD | 58784  | 59709  | 925 MU-24                                                   | 58946 yabP                                                                            | yabP | 58474  | -472 |
| TU-0049 | FWD | 70184  | 71184  | 1000 MU-25                                                  | 70221 araC                                                                            | araC | 70387  | 166  |
| TU-0050 | FWD | 71234  | 72284  | 1050 MU-26                                                  | 71240 yabI                                                                            | yabI | 71351  | 111  |
| TU-0051 | FWD | 71234  | 72284  | 1050 MU-26                                                  | 71271 yabI                                                                            | yabI | 71351  | 80   |
| TU-0052 | FWD | 77409  | 78909  | 1500 MU-27                                                  | 77357 sgrS;setA                                                                       | sgrS | 77367  | 10   |
| TU-0053 | FWD | 77409  | 78909  | 1500 MU-27                                                  | 77367 sgrS;setA                                                                       | sgrS | 77367  | 0    |
| TU-0054 | FWD | 84359  | 84734  | 375 MU-28                                                   | 84298 leuO                                                                            | leuO | 84368  | 70   |
| TU-0055 | FWD | 84359  | 84734  | 375 MU-28                                                   | 84307 leuO                                                                            | leuO | 84368  | 61   |
| TU-0056 | FWD | 85609  | 87834  | 2225 MU-29                                                  | 85599 ilvI;ilvH                                                                       | ilvI | 85630  | 31   |
| TU-0057 | FWD | 85609  | 87834  | 2225 MU-29                                                  | 85604 ilvI;ilvH                                                                       | ilvI | 85630  | 26   |
| TU-0058 | FWD | 88009  | 89159  | 1150 MU-30                                                  | 87837 fruR                                                                            | fruR | 88028  | 191  |
| TU-0059 | FWD | 88009  | 89159  | 1150 MU-30                                                  | 87868 fruR                                                                            | fruR | 88028  | 160  |
| TU-0060 | FWD | 88009  | 89159  | 1150 MU-30                                                  | 87969 fruR                                                                            | fruR | 88028  | 59   |
| TU-0061 | FWD | 89634  | 107459 | 17825 MU-31;MU-32;MU-33;MU-34;MU-35;MU-36;MU-37;MU-38;MU-39 | 89589 mraZ;mraW;ftsL;ftsI;murE;murF;mraY;murD;ftsW;murG;murC;ddlB;ftsQ;ftsA;ftsZ;lpxC | mraZ | 89634  | 45   |
| TU-0062 | FWD | 89959  | 107459 | 17500 MU-32;MU-33;MU-34;MU-35;MU-36;MU-37;MU-38;MU-39       | 89954 mraW;ftsL;ftsI;murE;murF;mraY;murD;ftsW;murG;murC;ddlB;ftsQ;ftsA;ftsZ;lpxC      | mraW | 90094  | 140  |
| TU-0063 | FWD | 89959  | 107459 | 17500 MU-32;MU-33;MU-34;MU-35;MU-36;MU-37;MU-38;MU-39       | 90014 mraW;ftsL;ftsI;murE;murF;mraY;murD;ftsW;murG;murC;ddlB;ftsQ;ftsA;ftsZ;lpxC      | mraW | 90094  | 80   |
| TU-0064 | FWD | 90334  | 107459 | 17125 MU-33;MU-34;MU-35;MU-36;MU-37;MU-38;MU-39             | 90327 ftsL;ftsI;murE;murF;mraY;murD;ftsW;murG;murC;ddlB;ftsQ;ftsA;ftsZ;lpxC           | ftsL | 91032  | 705  |
| TU-0065 | FWD | 90709  | 107459 | 16750 MU-34;MU-35;MU-36;MU-37;MU-38;MU-39                   | 90682 ftsL;ftsI;murE;murF;mraY;murD;ftsW;murG;murC;ddlB;ftsQ;ftsA;ftsZ;lpxC           | ftsL | 91032  | 350  |
| TU-0066 | FWD | 90709  | 107459 | 16750 MU-34;MU-35;MU-36;MU-37;MU-38;MU-39                   | 91028 ftsL;ftsI;murE;murF;mraY;murD;ftsW;murG;murC;ddlB;ftsQ;ftsA;ftsZ;lpxC           | ftsL | 91032  | 4    |
| TU-0067 | FWD | 93134  | 107459 | 14325 MU-35;MU-36;MU-37;MU-38;MU-39                         | 93137 murE;murF;mraY;murD;ftsW;murG;murC;ddlB;ftsQ;ftsA;ftsZ;lpxC                     | murE | 93166  | 29   |
| TU-0068 | FWD | 93134  | 107459 | 14325 MU-35;MU-36;MU-37;MU-38;MU-39                         | 93145 murE;murF;mraY;murD;ftsW;murG;murC;ddlB;ftsQ;ftsA;ftsZ;lpxC                     | murE | 93166  | 21   |
| TU-0069 | FWD | 100784 | 107459 | 6675 MU-36;MU-37;MU-38;MU-39                                | 100740 murC;ddlB;ftsQ;ftsA;ftsZ;lpxC                                                  | murC | 100765 | 25   |
| TU-0070 | FWD | 100784 | 107459 | 6675 MU-36;MU-37;MU-38;MU-39                                | 100750 murC;ddlB;ftsQ;ftsA;ftsZ;lpxC                                                  | murC | 100765 | 15   |
| TU-0071 | FWD | 102784 | 107459 | 4675 MU-37;MU-38;MU-39                                      | 102763 ftsQ;ftsA;ftsZ;lpxC                                                            | ftsQ | 103155 | 392  |
| TU-0072 | FWD | 104609 | 107459 | 2850 MU-38;MU-39                                            | 104560 ftsZ;lpxC                                                                      | ftsZ | 105305 | 745  |
| TU-0073 | FWD | 106509 | 107459 | 950 MU-39                                                   | 106507 lpxC                                                                           | lpxC | 106557 | 50   |
| TU-0074 | FWD | 106509 | 107459 | 950 MU-39                                                   | 106519 lpxC                                                                           | lpxC | 106557 | 38   |
| TU-0075 | FWD | 106509 | 107459 | 950 MU-39                                                   | 106530 lpxC                                                                           | lpxC | 106557 | 27   |
| TU-0076 | FWD | 107709 | 107984 | 275 MU-40                                                   | 107561 secM;secA;mutT                                                                 | secM | 107705 | 144  |
| TU-0077 | FWD | 108009 | 111584 | 3575 MU-41                                                  | 107977 secA;mutT                                                                      | secA | 108279 | 302  |
| TU-0078 | FWD | 108009 | 111584 | 3575 MU-41                                                  | 108025 secA;mutT                                                                      | secA | 108279 | 254  |
| TU-0079 | FWD | 108009 | 111584 | 3575 MU-41                                                  | 108119 secA;mutT                                                                      | secA | 108279 | 160  |
| TU-0080 | FWD | 108009 | 111584 | 3575 MU-41                                                  | 108132 secA;mutT                                                                      | secA | 108279 | 147  |
| TU-0081 | FWD | 113409 | 114484 | 1075 MU-42                                                  | 113396 guaC                                                                           | guaC | 113444 | 48   |
| TU-0082 | FWD | 113409 | 114484 | 1075 MU-42                                                  | 113415 guaC                                                                           | guaC | 113444 | 29   |

|         |     |        |        |                  |                            |      |        |      |
|---------|-----|--------|--------|------------------|----------------------------|------|--------|------|
| TU-0083 | FWD | 113409 | 114484 | 1075 MU-42       | 113436 guaC                | guaC | 113444 | 8    |
| TU-0084 | FWD | 118734 | 120209 | 1475 MU-43       | 118701 ampD;ampE           | ampD | 118733 | 32   |
| TU-0085 | FWD | 118734 | 120209 | 1475 MU-43       | 118918 ampD;ampE           | ampD | 118733 | -185 |
| TU-0086 | FWD | 122063 | 127588 | 5525 MU-44;MU-45 | 122034 pdhR;aceE;aceF;lpd  | pdhR | 122092 | 58   |
| TU-0087 | FWD | 122988 | 127588 | 4600 MU-45       | 122852 aceE;aceF;lpd       | aceE | 123017 | 165  |
| TU-0088 | FWD | 122988 | 127588 | 4600 MU-45       | 122860 aceE;aceF;lpd       | aceE | 123017 | 157  |
| TU-0089 | FWD | 122988 | 127588 | 4600 MU-45       | 122969 aceE;aceF;lpd       | aceE | 123017 | 48   |
| TU-0090 | FWD | 122988 | 127588 | 4600 MU-45       | 122975 aceE;aceF;lpd       | aceE | 123017 | 42   |
| TU-0091 | FWD | 122988 | 127588 | 4600 MU-45       | 122985 aceE;aceF;lpd       | aceE | 123017 | 32   |
| TU-0092 | FWD | 122988 | 127588 | 4600 MU-45       | 122992 aceE;aceF;lpd       | aceE | 123017 | 25   |
| TU-0093 | FWD | 122988 | 127588 | 4600 MU-45       | 123003 aceE;aceF;lpd       | aceE | 123017 | 14   |
| TU-0094 | FWD | 127638 | 129321 | 1683 MU-46       | 127700 lpd                 | lpd  | 127912 | 212  |
| TU-0095 | FWD | 127638 | 129321 | 1683 MU-46       | 127717 lpd                 | lpd  | 127912 | 195  |
| TU-0096 | FWD | 129571 | 129596 | 25 MU-47         | 129500 NT                  |      |        |      |
| TU-0097 | FWD | 130246 | 130671 | 425 MU-48        | 130202 NT                  |      |        |      |
| TU-0098 | FWD | 131546 | 134246 | 2700 MU-49       | 131519 acnB                | acnB | 131615 | 96   |
| TU-0099 | FWD | 131546 | 134246 | 2700 MU-49       | 131743 acnB                | acnB | 131615 | -128 |
| TU-0100 | FWD | 134346 | 134821 | 475 MU-50        | 134339 yacl                | yacl | 134388 | 49   |
| TU-0101 | FWD | 137071 | 138596 | 1525 MU-51       | 137044 cueO                | cueO | 137083 | 39   |
| TU-0102 | FWD | 137071 | 138596 | 1525 MU-51       | 137049 cueO                | cueO | 137083 | 34   |
| TU-0103 | FWD | 141371 | 142596 | 1225 MU-52       | 141360 hpt                 | hpt  | 141431 | 71   |
| TU-0104 | FWD | 141371 | 142596 | 1225 MU-52       | 141407 hpt                 | hpt  | 141431 | 24   |
| TU-0105 | FWD | 142646 | 144946 | 2300 MU-53       | 142733 yadG;yadH;yadI      | yadG | 142779 | 46   |
| TU-0106 | FWD | 145071 | 146250 | 1179 MU-54       | 145108 yadE                | yadE | 145081 | -27  |
| TU-0107 | FWD | 146968 | 147870 | 902 MU-55        | yadD                       | yadD | 146968 |      |
| TU-0108 | FWD | 147600 | 147825 | 225 MU-56        | 147583 NT                  |      |        |      |
| TU-0109 | FWD | 147600 | 147825 | 225 MU-56        | 147647 NT                  |      |        |      |
| TU-0110 | FWD | 162101 | 164526 | 2425 MU-57       | 162077 hrpB                | hrpB | 162105 | 28   |
| TU-0111 | FWD | 164601 | 167226 | 2625 MU-58       | 164648 mrcB                | mrcB | 164730 | 82   |
| TU-0112 | FWD | 164601 | 167226 | 2625 MU-58       | 164658 mrcB                | mrcB | 164730 | 72   |
| TU-0113 | FWD | 167451 | 173576 | 6125 MU-59;MU-60 | 167427 fhuA;fhuC;fhuD;fhuB | fhuA | 167484 | 57   |
| TU-0114 | FWD | 167451 | 173576 | 6125 MU-59;MU-60 | 167443 fhuA;fhuC;fhuD;fhuB | fhuA | 167484 | 41   |
| TU-0115 | FWD | 169776 | 173576 | 3800 MU-60       | 169728 fhuC;fhuD;fhuB      | fhuC | 169778 | 50   |
| TU-0116 | FWD | 169776 | 173576 | 3800 MU-60       | 169733 fhuC;fhuD;fhuB      | fhuC | 169778 | 45   |
| TU-0117 | FWD | 174951 | 176576 | 1625 MU-61       | 174931 clcA                | clcA | 175107 | 176  |
| TU-0118 | FWD | 174951 | 176576 | 1625 MU-61       | 174975 clcA                | clcA | 175107 | 132  |
| TU-0119 | FWD | 174951 | 176576 | 1625 MU-61       | 175009 clcA                | clcA | 175107 | 98   |
| TU-0120 | FWD | 174951 | 176576 | 1625 MU-61       | 175074 clcA                | clcA | 175107 | 33   |
| TU-0121 | FWD | 176601 | 177051 | 450 MU-62        | 176558 erpA                | erpA | 176610 | 52   |
| TU-0122 | FWD | 176601 | 177051 | 450 MU-62        | 176561 erpA                | erpA | 176610 | 49   |
| TU-0123 | FWD | 176601 | 177051 | 450 MU-62        | 176583 erpA                | erpA | 176610 | 27   |
| TU-0124 | FWD | 176601 | 177051 | 450 MU-62        | 176592 erpA                | erpA | 176610 | 18   |
| TU-0125 | FWD | 179226 | 180582 | 1356 MU-63       | 179264 dgt                 | dgt  | 179237 | -27  |
| TU-0126 | FWD | 180882 | 183582 | 2700 MU-64       | 180852 degP;cdaR           | degP | 180884 | 32   |
| TU-0127 | FWD | 180882 | 183582 | 2700 MU-64       | 180859 degP;cdaR           | degP | 180884 | 25   |
| TU-0128 | FWD | 186157 | 186832 | 675 MU-65        | 186142 NT                  |      |        |      |

|         |     |        |        |                  |                                 |      |        |     |
|---------|-----|--------|--------|------------------|---------------------------------|------|--------|-----|
| TU-0129 | FWD | 189607 | 189757 | 150 MU-66        | 189639 tff                      | tff  | 189712 | 73  |
| TU-0130 | FWD | 189807 | 191707 | 1900 MU-67       | 189842 rpsB;tsf                 | rpsB | 189874 | 32  |
| TU-0131 | FWD | 189807 | 191707 | 1900 MU-67       | 189866 rpsB;tsf                 | rpsB | 189874 | 8   |
| TU-0132 | FWD | 191757 | 192732 | 975 MU-68        | 191754 pyrH                     | pyrH | 191855 | 101 |
| TU-0133 | FWD | 191757 | 192732 | 975 MU-68        | 191812 pyrH                     | pyrH | 191855 | 43  |
| TU-0134 | FWD | 191757 | 192732 | 975 MU-68        | 191820 pyrH                     | pyrH | 191855 | 35  |
| TU-0135 | FWD | 192757 | 194532 | 1775 MU-69       | 192617 frr;dxr                  | frr  | 192872 | 255 |
| TU-0136 | FWD | 192757 | 194532 | 1775 MU-69       | 192666 frr;dxr                  | frr  | 192872 | 206 |
| TU-0137 | FWD | 192757 | 194532 | 1775 MU-69       | 192790 frr;dxr                  | frr  | 192872 | 82  |
| TU-0138 | FWD | 192757 | 194532 | 1775 MU-69       | 192797 frr;dxr                  | frr  | 192872 | 75  |
| TU-0139 | FWD | 192757 | 194532 | 1775 MU-69       | 192814 frr;dxr                  | frr  | 192872 | 58  |
| TU-0140 | FWD | 192757 | 194532 | 1775 MU-69       | 192854 frr;dxr                  | frr  | 192872 | 18  |
| TU-0141 | FWD | 192757 | 194532 | 1775 MU-69       | 192863 frr;dxr                  | frr  | 192872 | 9   |
| TU-0142 | FWD | 194632 | 196532 | 1900 MU-70       | 194843 ispU;cdsA                | ispU | 194903 | 60  |
| TU-0143 | FWD | 196557 | 200257 | 3700 MU-71;MU-72 | 196415 rseP;bamA                | rseP | 196546 | 131 |
| TU-0144 | FWD | 196557 | 200257 | 3700 MU-71;MU-72 | 196429 rseP;bamA                | rseP | 196546 | 117 |
| TU-0145 | FWD | 197907 | 200257 | 2350 MU-72       | 197823 bamA                     | bamA | 197928 | 105 |
| TU-0146 | FWD | 197907 | 200257 | 2350 MU-72       | 197883 bamA                     | bamA | 197928 | 45  |
| TU-0147 | FWD | 200282 | 202007 | 1725 MU-73       | 200138 skp;lpxD                 | skp  | 200482 | 344 |
| TU-0148 | FWD | 200282 | 202007 | 1725 MU-73       | 200212 skp;lpxD                 | skp  | 200482 | 270 |
| TU-0149 | FWD | 200282 | 202007 | 1725 MU-73       | 200256 skp;lpxD                 | skp  | 200482 | 226 |
| TU-0150 | FWD | 200282 | 202007 | 1725 MU-73       | 200299 skp;lpxD                 | skp  | 200482 | 183 |
| TU-0151 | FWD | 200282 | 202007 | 1725 MU-73       | 200305 skp;lpxD                 | skp  | 200482 | 177 |
| TU-0152 | FWD | 200282 | 202007 | 1725 MU-73       | 200317 skp;lpxD                 | skp  | 200482 | 165 |
| TU-0153 | FWD | 200282 | 202007 | 1725 MU-73       | 200378 skp;lpxD                 | skp  | 200482 | 104 |
| TU-0154 | FWD | 200282 | 202007 | 1725 MU-73       | 200387 skp;lpxD                 | skp  | 200482 | 95  |
| TU-0155 | FWD | 200282 | 202007 | 1725 MU-73       | 200399 skp;lpxD                 | skp  | 200482 | 83  |
| TU-0156 | FWD | 202032 | 208407 | 6375 MU-74       | 202019 fabZ;lpxA;lpxB;rnhB;dnaE | fabZ | 202101 | 82  |
| TU-0157 | FWD | 202032 | 208407 | 6375 MU-74       | 202066 fabZ;lpxA;lpxB;rnhB;dnaE | fabZ | 202101 | 35  |
| TU-0158 | FWD | 202032 | 208407 | 6375 MU-74       | 202074 fabZ;lpxA;lpxB;rnhB;dnaE | fabZ | 202101 | 27  |
| TU-0159 | FWD | 202032 | 208407 | 6375 MU-74       | 202082 fabZ;lpxA;lpxB;rnhB;dnaE | fabZ | 202101 | 19  |
| TU-0160 | FWD | 208432 | 209582 | 1150 MU-75       | 208412 accA                     | accA | 208621 | 209 |
| TU-0161 | FWD | 209682 | 211757 | 2075 MU-76       | 209658 ldcC                     | ldcC | 209679 | 21  |
| TU-0162 | FWD | 211782 | 213682 | 1900 MU-77       | 211858 yaeR;tilS                | yaeR | 211877 | 19  |
| TU-0163 | FWD | 214307 | 216107 | 1800 MU-78;MU-79 | 214269 yaeQ;yaeJ;nlpE           | yaeQ | 214291 | 22  |
| TU-0164 | FWD | 214307 | 216107 | 1800 MU-78;MU-79 | 214284 yaeQ;yaeJ;nlpE           | yaeQ | 214291 | 7   |
| TU-0165 | FWD | 215332 | 216107 | 775 MU-79        | 215123 nlpE                     | nlpE | 215269 | 146 |
| TU-0166 | FWD | 222832 | 223707 | 875 MU-80        | 222806 gmhB                     | gmhB | 222833 | 27  |
| TU-0167 | FWD | 223732 | 225607 | 1875 MU-81       | 223771 rrsH;ileV;alaV           | rrsH | 223771 | 0   |
| TU-0168 | FWD | 225632 | 229012 | 3380 MU-82       | 225711 rrlH;rrfH;aspU           | rrlH | 225759 | 48  |
| TU-0169 | FWD | 229162 | 229862 | 700 MU-83        | 229134 dkgB                     | dkgB | 229167 | 33  |
| TU-0170 | FWD | 231087 | 232587 | 1500 MU-84       | 231063 yafD;yafE                | yafD | 231122 | 59  |
| TU-0171 | FWD | 234813 | 235463 | 650 MU-85        | 234785 yafS                     | yafS | 234816 | 31  |
| TU-0172 | FWD | 235963 | 236888 | 925 MU-86        | 236021 dnaQ                     | dnaQ | 236067 | 46  |
| TU-0173 | FWD | 236938 | 237038 | 100 MU-87        | 236861 aspV                     | aspV | 236931 | 70  |
| TU-0174 | FWD | 237335 | 238120 | 785 MU-88        | yafT                            | yafT | 237335 |     |

|         |     |        |        |                    |                       |       |        |      |
|---------|-----|--------|--------|--------------------|-----------------------|-------|--------|------|
| TU-0175 | FWD | 238462 | 238586 | 124 MU-89          | C0067                 | C0067 | 238462 |      |
| TU-0176 | FWD | 239106 | 239378 | 272 MU-90          | yafF                  | yafF  | 239106 |      |
| TU-0177 | FWD | 240338 | 240813 | 475 MU-91          | 240333 ivy            | ivy   | 240343 | 10   |
| TU-0178 | FWD | 243488 | 245313 | 1825 MU-92         | 243512 lpcA;yafJ      | lpcA  | 243543 | 31   |
| TU-0179 | FWD | 243488 | 245313 | 1825 MU-92         | 243522 lpcA;yafJ      | lpcA  | 243543 | 21   |
| TU-0180 | FWD | 246688 | 248038 | 1350 MU-93         | 246656 yafL;yafM      | yafL  | 246712 | 56   |
| TU-0181 | FWD | 248138 | 248338 | 200 MU-94          | 248128 NT             |       |        |      |
| TU-0182 | FWD | 250538 | 250788 | 250 MU-95          | 250492 lafU           | lafU  | 250072 | -420 |
| TU-0183 | FWD | 250863 | 251838 | 975 MU-96          | 250883 dinB           | dinB  | 250898 | 15   |
| TU-0184 | FWD | 251913 | 252813 | 900 MU-97          | 251969 yafN;yafO;yafP | yafN  | 252005 | 36   |
| TU-0185 | FWD | 252709 | 253161 | 452 MU-98          | yafP                  | yafP  | 252709 |      |
| TU-0186 | FWD | 253363 | 253463 | 100 MU-99          | 253336 NT             |       |        |      |
| TU-0187 | FWD | 253479 | 253685 | 206 MU-100         | ykfJ                  | ykfJ  | 253479 |      |
| TU-0188 | FWD | 253702 | 254202 | 500 MU-101         | prfH                  | prfH  | 253702 |      |
| TU-0189 | FWD | 255938 | 256438 | 500 MU-102         | 255918 gpt            | gpt   | 255977 | 59   |
| TU-0190 | FWD | 255938 | 256438 | 500 MU-102         | 255924 gpt            | gpt   | 255977 | 53   |
| TU-0191 | FWD | 255938 | 256438 | 500 MU-102         | 255936 gpt            | gpt   | 255977 | 41   |
| TU-0192 | FWD | 256513 | 257788 | 1275 MU-103        | 256502 frsA           | frsA  | 256527 | 25   |
| TU-0193 | FWD | 256513 | 257788 | 1275 MU-103        | 256509 frsA           | frsA  | 256527 | 18   |
| TU-0194 | FWD | 257813 | 258388 | 575 MU-104         | 257810 crl            | crl   | 257829 | 19   |
| TU-0195 | FWD | 259489 | 261989 | 2500 MU-105        | 259572 proB;proA      | proB  | 259612 | 40   |
| TU-0196 | FWD | 259489 | 261989 | 2500 MU-105        | 259576 proB;proA      | proB  | 259612 | 36   |
| TU-0197 | FWD | 259489 | 261989 | 2500 MU-105        | 259584 proB;proA      | proB  | 259612 | 28   |
| TU-0198 | FWD | 262089 | 262214 | 125 MU-106         | 262064 thrW           | thrW  | 262095 | 31   |
| TU-0199 | FWD | 262089 | 262214 | 125 MU-106         | 262114 thrW           | thrW  | 262095 | -19  |
| TU-0200 | FWD | 268364 | 268539 | 175 MU-107         | 268350 NT             |       |        |      |
| TU-0201 | FWD | 269514 | 272564 | 3050 MU-108;MU-109 | 269482 insN;insI;insN | insN  | 269502 | 20   |
| TU-0202 | FWD | 270864 | 272564 | 1700 MU-109        | 270974 insN           | insN  | 270988 | 14   |
| TU-0203 | FWD | 270864 | 272564 | 1700 MU-109        | 270979 insN           | insN  | 270988 | 9    |
| TU-0204 | FWD | 274539 | 277114 | 2575 MU-110        | 274508 mmuP;mmuM      | mmuP  | 274549 | 41   |
| TU-0205 | FWD | 278414 | 279314 | 900 MU-111         | NT                    |       |        |      |
| TU-0206 | FWD | 281481 | 287623 | 6142 MU-112        | yagE;yagF;yagG;yagH   | yagE  | 281481 |      |
| TU-0207 | FWD | 289715 | 290040 | 325 MU-113         | 289619 NT             |       |        |      |
| TU-0208 | FWD | 290065 | 290590 | 525 MU-114         | NT                    |       |        |      |
| TU-0209 | FWD | 290765 | 291390 | 625 MU-115         | 290751 yagJ           | yagJ  | 290724 | -27  |
| TU-0210 | FWD | 294940 | 295365 | 425 MU-116         | 294852 NT             |       |        |      |
| TU-0211 | FWD | 296365 | 296940 | 575 MU-117         | 296384 ptwF           | ptwF  | 296430 | 46   |
| TU-0212 | FWD | 302165 | 303140 | 975 MU-118         | 302181 yagU           | yagU  | 302215 | 34   |
| TU-0213 | FWD | 302165 | 303140 | 975 MU-118         | 302183 yagU           | yagU  | 302215 | 32   |
| TU-0214 | FWD | 311336 | 311563 | 227 MU-119         | ykgL                  | ykgL  | 311336 |      |
| TU-0215 | FWD | 312068 | 312193 | 125 MU-120         | 312032 NT             |       |        |      |
| TU-0216 | FWD | 313581 | 314452 | 871 MU-121         | eaeH                  | eaeH  | 313581 |      |
| TU-0217 | FWD | 314493 | 315693 | 1200 MU-122        | insE;insF             | insE  | 314506 |      |
| TU-0218 | FWD | 316663 | 316791 | 128 MU-123         | ykgQ                  | ykgQ  | 316663 |      |
| TU-0219 | FWD | 319468 | 319743 | 275 MU-124         | 319342 ykgD           | ykgD  | 319451 | 109  |
| TU-0220 | FWD | 319468 | 319743 | 275 MU-124         | 319351 ykgD           | ykgD  | 319451 | 100  |

|         |     |        |        |                    |                                      |      |        |     |
|---------|-----|--------|--------|--------------------|--------------------------------------|------|--------|-----|
| TU-0221 | FWD | 320818 | 323868 | 3050 MU-125        | 320708 ykgE;ykgF;ykgG                | ykgE | 320832 | 124 |
| TU-0222 | FWD | 328693 | 330368 | 1675 MU-126        | 328645 betT                          | betT | 328687 | 42  |
| TU-0223 | FWD | 330393 | 330768 | 375 MU-127         | 330428 NT                            |      |        |     |
| TU-0224 | FWD | 331293 | 332618 | 1325 MU-128        | 331089 yahA                          | yahA | 331595 | 506 |
| TU-0225 | FWD | 331293 | 332618 | 1325 MU-128        | 331266 yahA                          | yahA | 331595 | 329 |
| TU-0226 | FWD | 331293 | 332618 | 1325 MU-128        | 331462 yahA                          | yahA | 331595 | 133 |
| TU-0227 | FWD | 331293 | 332618 | 1325 MU-128        | 331470 yahA                          | yahA | 331595 | 125 |
| TU-0228 | FWD | 334943 | 338943 | 4000 MU-129        | 334399 yahD;yahE;yahF;yahG           | yahD | 334504 | 105 |
| TU-0229 | FWD | 334943 | 338943 | 4000 MU-129        | 334470 yahD;yahE;yahF;yahG           | yahD | 334504 | 34  |
| TU-0230 | FWD | 339218 | 341793 | 2575 MU-130;MU-131 | 339162 yahI;yahJ                     | yahI | 339389 | 227 |
| TU-0231 | FWD | 340368 | 341793 | 1425 MU-131        | 340325 yahJ                          | yahJ | 340349 | 24  |
| TU-0232 | FWD | 341968 | 343143 | 1175 MU-132        | 342042 yahK                          | yahK | 342108 | 66  |
| TU-0233 | FWD | 341968 | 343143 | 1175 MU-132        | 342062 yahK                          | yahK | 342108 | 46  |
| TU-0234 | FWD | 341968 | 343143 | 1175 MU-132        | 342079 yahK                          | yahK | 342108 | 29  |
| TU-0235 | FWD | 343400 | 344215 | 815 MU-133         | yahL                                 | yahL | 343400 |     |
| TU-0236 | FWD | 344493 | 344643 | 150 MU-134         | 344602 NT                            |      |        |     |
| TU-0237 | FWD | 344628 | 344873 | 245 MU-135         | yahM                                 | yahM | 344628 |     |
| TU-0238 | FWD | 345668 | 346043 | 375 MU-136         | 345656 yahO                          | yahO | 345708 | 52  |
| TU-0239 | FWD | 345668 | 346043 | 375 MU-136         | 345664 yahO                          | yahO | 345708 | 44  |
| TU-0240 | FWD | 345668 | 346043 | 375 MU-136         | 345678 yahO                          | yahO | 345708 | 30  |
| TU-0241 | FWD | 347893 | 353543 | 5650 MU-137        | 347871 prpB;prpC;prpD;prpE           | prpB | 347906 | 35  |
| TU-0242 | FWD | 354143 | 357043 | 2900 MU-138        | 354108 codB;codA                     | codB | 354146 | 38  |
| TU-0243 | FWD | 354143 | 357043 | 2900 MU-138        | 354119 codB;codA                     | codB | 354146 | 27  |
| TU-0244 | FWD | 358023 | 360370 | 2347 MU-139        | 357998 cynT;cynS;cynX                | cynT | 358023 | 25  |
| TU-0245 | FWD | 368052 | 374027 | 5975 MU-140        | 367744 mhpA;mhpB;mhpC;mhpD;mhpF;mhpE | mhpA | 367835 | 91  |
| TU-0246 | FWD | 374152 | 375852 | 1700 MU-141        | 374107 mhpT                          | mhpT | 374683 | 576 |
| TU-0247 | FWD | 375977 | 376952 | 975 MU-142         | 375966 yaiL                          | yaiL | 375996 | 30  |
| TU-0248 | FWD | 375977 | 376952 | 975 MU-142         | 375971 yaiL                          | yaiL | 375996 | 25  |
| TU-0249 | FWD | 380506 | 381781 | 1275 MU-143        | insC;insD                            | insC | 380575 |     |
| TU-0250 | FWD | 382156 | 382581 | 425 MU-144         | 382126 NT                            |      |        |     |
| TU-0251 | FWD | 384456 | 387831 | 3375 MU-145        | 384430 tauA;tauB;tauC;tauD           | tauA | 384456 | 26  |
| TU-0252 | FWD | 389475 | 390932 | 1457 MU-146        | 389071 yaiT                          | yaiT | 389475 | 404 |
| TU-0253 | FWD | 390961 | 391361 | 400 MU-147         | NT                                   |      |        |     |
| TU-0254 | FWD | 389475 | 394353 | 4878 MU-148        | yaiT;yaiV                            | yaiT | 389475 |     |
| TU-0255 | FWD | 395536 | 396775 | 1239 MU-149        | 395657 sbmA                          | sbmA | 395863 | 206 |
| TU-0256 | FWD | 395536 | 396775 | 1239 MU-149        | 395704 sbmA                          | sbmA | 395863 | 159 |
| TU-0257 | FWD | 395536 | 396775 | 1239 MU-149        | 395779 sbmA                          | sbmA | 395863 | 84  |
| TU-0258 | FWD | 396875 | 398179 | 1304 MU-150        | 396858 yaiW                          | yaiW | 397096 | 238 |
| TU-0259 | FWD | 398804 | 399379 | 575 MU-151         | 398796 yaiZ                          | yaiZ | 398817 | 21  |
| TU-0260 | FWD | 400579 | 400954 | 375 MU-152         | 400543 iraP                          | iraP | 400610 | 67  |
| TU-0261 | FWD | 400579 | 400954 | 375 MU-152         | 400587 iraP                          | iraP | 400610 | 23  |
| TU-0262 | FWD | 400979 | 402829 | 1850 MU-153        | 400875 phoA;psiF                     | phoA | 400971 | 96  |
| TU-0263 | FWD | 400979 | 402829 | 1850 MU-153        | 400902 phoA;psiF                     | phoA | 400971 | 69  |
| TU-0264 | FWD | 400979 | 402829 | 1850 MU-153        | 400916 phoA;psiF                     | phoA | 400971 | 55  |
| TU-0265 | FWD | 402980 | 404030 | 1050 MU-154        | 402912 adrA                          | adrA | 402927 | 15  |
| TU-0266 | FWD | 405005 | 405455 | 450 MU-155         | 404965 yaiI                          | yaiI | 404988 | 23  |

|         |     |        |        |                           |                                      |      |        |     |
|---------|-----|--------|--------|---------------------------|--------------------------------------|------|--------|-----|
| TU-0267 | FWD | 405530 | 406530 | 1000 MU-156;MU-157        | 405456 aroL;yaiA;aroM                | aroL | 405629 | 173 |
| TU-0268 | FWD | 405530 | 406530 | 1000 MU-156;MU-157        | 405502 aroL;yaiA;aroM                | aroL | 405629 | 127 |
| TU-0269 | FWD | 406205 | 407380 | 1175 MU-157;MU-158        | 406176 yaiA;aroM                     | yaiA | 406203 | 27  |
| TU-0270 | FWD | 406555 | 407380 | 825 MU-158                | 406399 aroM                          | aroM | 406652 | 253 |
| TU-0271 | FWD | 407405 | 407680 | 275 MU-159                | 407371 yaiE                          | yaiE | 407401 | 30  |
| TU-0272 | FWD | 407780 | 408280 | 500 MU-160                | 407685 ykiA                          | ykiA | 407893 | 208 |
| TU-0273 | FWD | 409305 | 410605 | 1300 MU-161               | 409344 mak                           | mak  | 409368 | 24  |
| TU-0274 | FWD | 415456 | 416281 | 825 MU-162                | 415429 NT                            |      |        |     |
| TU-0275 | FWD | 416381 | 418381 | 2000 MU-163               | 416378 phoB;phoR                     | phoB | 416366 | -12 |
| TU-0276 | FWD | 418581 | 421606 | 3025 MU-164;MU-165        | 418645 brnQ;proY                     | brnQ | 418815 | 170 |
| TU-0277 | FWD | 418581 | 421606 | 3025 MU-164;MU-165        | 418776 brnQ;proY                     | brnQ | 418815 | 39  |
| TU-0278 | FWD | 420206 | 421606 | 1400 MU-165               | 420146 proY                          | proY | 420210 | 64  |
| TU-0279 | FWD | 421806 | 423656 | 1850 MU-166               | 421719 malZ                          | malZ | 421739 | 20  |
| TU-0280 | FWD | 424231 | 426056 | 1825 MU-167               | 424209 queA;tgt                      | queA | 424235 | 26  |
| TU-0281 | FWD | 426081 | 426481 | 400 MU-168                | 425886 NT                            |      |        |     |
| TU-0282 | FWD | 426081 | 426481 | 400 MU-168                | 425978 NT                            |      |        |     |
| TU-0283 | FWD | 426081 | 426481 | 400 MU-168                | 426063 NT                            |      |        |     |
| TU-0284 | FWD | 426081 | 426481 | 400 MU-168                | 426165 NT                            |      |        |     |
| TU-0285 | FWD | 426531 | 426831 | 300 MU-169                | 426428 yajC;secD;secF                | yajC | 426511 | 83  |
| TU-0286 | FWD | 426531 | 426831 | 300 MU-169                | 426439 yajC;secD;secF                | yajC | 426511 | 72  |
| TU-0287 | FWD | 426531 | 426831 | 300 MU-169                | 426472 yajC;secD;secF                | yajC | 426511 | 39  |
| TU-0288 | FWD | 426859 | 429709 | 2850 MU-170               | 426798 secD;secF                     | secD | 426871 | 73  |
| TU-0289 | FWD | 426859 | 429709 | 2850 MU-170               | 426873 secD;secF                     | secD | 426871 | -2  |
| TU-0290 | FWD | 426859 | 429709 | 2850 MU-170               | 426882 secD;secF                     | secD | 426871 | -11 |
| TU-0291 | FWD | 426859 | 429709 | 2850 MU-170               | 426887 secD;secF                     | secD | 426871 | -16 |
| TU-0292 | FWD | 429809 | 430284 | 475 MU-171                | 429809 yajD                          | yajD | 429829 | 20  |
| TU-0293 | FWD | 432212 | 436337 | 4125 MU-172;MU-173;MU-174 | 432199 nrdR;ribD;ribE;nusB;thiL;pgpA | nrdR | 432226 | 27  |
| TU-0294 | FWD | 433737 | 436337 | 2600 MU-173;MU-174        | 433735 ribE;nusB;thiL;pgpA           | ribE | 433871 | 136 |
| TU-0295 | FWD | 433737 | 436337 | 2600 MU-173;MU-174        | 433817 ribE;nusB;thiL;pgpA           | ribE | 433871 | 54  |
| TU-0296 | FWD | 433737 | 436337 | 2600 MU-173;MU-174        | 433820 ribE;nusB;thiL;pgpA           | ribE | 433871 | 51  |
| TU-0297 | FWD | 433737 | 436337 | 2600 MU-173;MU-174        | 433828 ribE;nusB;thiL;pgpA           | ribE | 433871 | 43  |
| TU-0298 | FWD | 435737 | 436337 | 600 MU-174                | 435808 pgpA                          | pgpA | 435813 | 5   |
| TU-0299 | FWD | 437412 | 437687 | 275 MU-175                | 437492 NT                            |      |        |     |
| TU-0300 | FWD | 440712 | 442212 | 1500 MU-176               | 440693 thiI                          | thiI | 440773 | 80  |
| TU-0301 | FWD | 443812 | 444487 | 675 MU-177                | 443824 yajQ                          | yajQ | 443907 | 83  |
| TU-0302 | FWD | 443812 | 444487 | 675 MU-177                | 443852 yajQ                          | yajQ | 443907 | 55  |
| TU-0303 | FWD | 443812 | 444487 | 675 MU-177                | 443861 yajQ                          | yajQ | 443907 | 46  |
| TU-0304 | FWD | 443812 | 444487 | 675 MU-177                | 443882 yajQ                          | yajQ | 443907 | 25  |
| TU-0305 | FWD | 443812 | 444487 | 675 MU-177                | 443888 yajQ                          | yajQ | 443907 | 19  |
| TU-0306 | FWD | 453587 | 454037 | 450 MU-178                | 453575 bolA                          | bolA | 453696 | 121 |
| TU-0307 | FWD | 453587 | 454037 | 450 MU-178                | 453607 bolA                          | bolA | 453696 | 89  |
| TU-0308 | FWD | 453587 | 454037 | 450 MU-178                | 453649 bolA                          | bolA | 453696 | 47  |
| TU-0309 | FWD | 453587 | 454037 | 450 MU-178                | 453658 bolA                          | bolA | 453696 | 38  |
| TU-0310 | FWD | 454112 | 455762 | 1650 MU-179               | 454217 tig                           | tig  | 454357 | 140 |
| TU-0311 | FWD | 454112 | 455762 | 1650 MU-179               | 454228 tig                           | tig  | 454357 | 129 |
| TU-0312 | FWD | 454112 | 455762 | 1650 MU-179               | 454331 tig                           | tig  | 454357 | 26  |

|         |     |        |        |                    |                       |      |        |     |
|---------|-----|--------|--------|--------------------|-----------------------|------|--------|-----|
| TU-0313 | FWD | 455787 | 457912 | 2125 MU-180        | 455778 clpP;clpX      | clpP | 455901 | 123 |
| TU-0314 | FWD | 455787 | 457912 | 2125 MU-180        | 455801 clpP;clpX      | clpP | 455901 | 100 |
| TU-0315 | FWD | 455787 | 457912 | 2125 MU-180        | 455829 clpP;clpX      | clpP | 455901 | 72  |
| TU-0316 | FWD | 455787 | 457912 | 2125 MU-180        | 455867 clpP;clpX      | clpP | 455901 | 34  |
| TU-0317 | FWD | 455787 | 457912 | 2125 MU-180        | 455873 clpP;clpX      | clpP | 455901 | 28  |
| TU-0318 | FWD | 455787 | 457912 | 2125 MU-180        | 455882 clpP;clpX      | clpP | 455901 | 19  |
| TU-0319 | FWD | 457980 | 459055 | 1075 MU-181        | 457992 lon            | lon  | 458112 | 120 |
| TU-0320 | FWD | 457980 | 459055 | 1075 MU-181        | 458039 lon            | lon  | 458112 | 73  |
| TU-0321 | FWD | 457980 | 459055 | 1075 MU-181        | 458090 lon            | lon  | 458112 | 22  |
| TU-0322 | FWD | 459080 | 460555 | 1475 MU-182        | 459037 NT             |      |        |     |
| TU-0323 | FWD | 459080 | 460555 | 1475 MU-182        | 459330 NT             |      |        |     |
| TU-0324 | FWD | 459080 | 460555 | 1475 MU-182        | 459337 NT             |      |        |     |
| TU-0325 | FWD | 459080 | 460555 | 1475 MU-182        | 459339 NT             |      |        |     |
| TU-0326 | FWD | 460580 | 461005 | 425 MU-183         | 460556 hupB           | hupB | 460675 | 119 |
| TU-0327 | FWD | 460580 | 461005 | 425 MU-183         | 460615 hupB           | hupB | 460675 | 60  |
| TU-0328 | FWD | 460580 | 461005 | 425 MU-183         | 460619 hupB           | hupB | 460675 | 56  |
| TU-0329 | FWD | 460580 | 461005 | 425 MU-183         | 460637 hupB           | hupB | 460675 | 38  |
| TU-0330 | FWD | 460580 | 461005 | 425 MU-183         | 460655 hupB           | hupB | 460675 | 20  |
| TU-0331 | FWD | 461030 | 464005 | 2975 MU-184        | 461076 ppiD;ybaV;ybaW | ppiD | 461139 | 63  |
| TU-0332 | FWD | 466630 | 467480 | 850 MU-185         | 466606 cof            | cof  | 466636 | 30  |
| TU-0333 | FWD | 467605 | 471605 | 4000 MU-186;MU-187 | 467581 ybaO;mdlA;mdlB | ybaO | 467607 | 26  |
| TU-0334 | FWD | 470330 | 471605 | 1275 MU-187        | mdlB                  | mdlB | 469860 |     |
| TU-0335 | FWD | 471805 | 473480 | 1675 MU-188;MU-189 | 471781 glnK;amtB      | glnK | 471822 | 41  |
| TU-0336 | FWD | 472155 | 473480 | 1325 MU-189        | 472073 amtB           | amtB | 472190 | 117 |
| TU-0337 | FWD | 474555 | 475155 | 600 MU-190         | 474530 ybaY           | ybaY | 474603 | 73  |
| TU-0338 | FWD | 474555 | 475155 | 600 MU-190         | 474538 ybaY           | ybaY | 474603 | 65  |
| TU-0339 | FWD | 475680 | 475780 | 100 MU-191         | 475672 ffs            | ffs  | 475672 | 0   |
| TU-0340 | FWD | 475880 | 476255 | 375 MU-192         | 475842 ybaA           | ybaA | 475896 | 54  |
| TU-0341 | FWD | 477905 | 478980 | 1075 MU-193        | 478077 NT             |      |        |     |
| TU-0342 | FWD | 484983 | 485533 | 550 MU-194         | 484940 acrR           | acrR | 484985 | 45  |
| TU-0343 | FWD | 485733 | 489283 | 3550 MU-195        | 485713 kefA           | kefA | 485760 | 47  |
| TU-0344 | FWD | 490108 | 490508 | 400 MU-196         | 490082 ybaN           | ybaN | 490106 | 24  |
| TU-0345 | FWD | 490533 | 491208 | 675 MU-197         | 490534 apt            | apt  | 490636 | 102 |
| TU-0346 | FWD | 491283 | 493058 | 1775 MU-198        | 491278 dnaX           | dnaX | 491316 | 38  |
| TU-0347 | FWD | 493083 | 494233 | 1150 MU-199        | 493133 ybaB;recR      | ybaB | 493300 | 167 |
| TU-0348 | FWD | 493083 | 494233 | 1150 MU-199        | 493139 ybaB;recR      | ybaB | 493300 | 161 |
| TU-0349 | FWD | 493083 | 494233 | 1150 MU-199        | 493170 ybaB;recR      | ybaB | 493300 | 130 |
| TU-0350 | FWD | 493083 | 494233 | 1150 MU-199        | 493242 ybaB;recR      | ybaB | 493300 | 58  |
| TU-0351 | FWD | 493083 | 494233 | 1150 MU-199        | 493275 ybaB;recR      | ybaB | 493300 | 25  |
| TU-0352 | FWD | 494308 | 496183 | 1875 MU-200        | 494300 htpG           | htpG | 494344 | 44  |
| TU-0353 | FWD | 494308 | 496183 | 1875 MU-200        | 494306 htpG           | htpG | 494344 | 38  |
| TU-0354 | FWD | 494308 | 496183 | 1875 MU-200        | 494314 htpG           | htpG | 494344 | 30  |
| TU-0355 | FWD | 494308 | 496183 | 1875 MU-200        | 494328 htpG           | htpG | 494344 | 16  |
| TU-0356 | FWD | 496383 | 497183 | 800 MU-201         | 496357 adk            | adk  | 496399 | 42  |
| TU-0357 | FWD | 497283 | 498108 | 825 MU-202         | 497255 hemH           | hemH | 497279 | 24  |
| TU-0358 | FWD | 499362 | 500787 | 1425 MU-203        | 499323 gsk            | gsk  | 499349 | 26  |



|         |     |        |        |             |                                              |      |        |     |
|---------|-----|--------|--------|-------------|----------------------------------------------|------|--------|-----|
| TU-0359 | FWD | 504137 | 505864 | 1727 MU-204 | 504107 ushA                                  | ushA | 504138 | 31  |
| TU-0360 | FWD | 504137 | 505864 | 1727 MU-204 | 504112 ushA                                  | ushA | 504138 | 26  |
| TU-0361 | FWD | 506264 | 506489 | 225 MU-205  | 506428 sroB                                  | sroB | 506428 | 0   |
| TU-0362 | FWD | 507414 | 508039 | 625 MU-206  | 507400 ybaQ                                  | ybaQ | 507442 | 42  |
| TU-0363 | FWD | 507414 | 508039 | 625 MU-206  | 507406 ybaQ                                  | ybaQ | 507442 | 36  |
| TU-0364 | FWD | 510814 | 513114 | 2300 MU-207 | 510797 ybaS;ybaT                             | ybaS | 510865 | 68  |
| TU-0365 | FWD | 510814 | 513114 | 2300 MU-207 | 510827 ybaS;ybaT                             | ybaS | 510865 | 38  |
| TU-0366 | FWD | 513139 | 513889 | 750 MU-208  | 513098 cueR                                  | cueR | 513217 | 119 |
| TU-0367 | FWD | 515139 | 516639 | 1500 MU-209 | 515116 ybbL;ybbM                             | ybbL | 515143 | 27  |
| TU-0368 | FWD | 518414 | 522014 | 3600 MU-210 | 518602 ybbA;ybbP                             | ybbA | 518957 | 355 |
| TU-0369 | FWD | 518414 | 522014 | 3600 MU-210 | 518895 ybbA;ybbP                             | ybbA | 518957 | 62  |
| TU-0370 | FWD | 522439 | 526339 | 3900 MU-211 | 522451 rhsD                                  | rhsD | 522485 | 34  |
| TU-0371 | FWD | 526514 | 527864 | 1350 MU-212 | 526780 ybbC;yIbH                             | ybbC | 526805 | 25  |
| TU-0372 | FWD | 527864 | 528354 | 490 MU-213  | ybbD                                         | ybbD | 527864 |     |
| TU-0373 | FWD | 528724 | 528816 | 92 MU-214   | yIbI                                         | yIbI | 528724 |     |
| TU-0374 | FWD | 531639 | 532114 | 475 MU-215  | 531614 allA                                  | allA | 531675 | 61  |
| TU-0375 | FWD | 532214 | 532864 | 650 MU-216  | 532189 allR                                  | allR | 532235 | 46  |
| TU-0376 | FWD | 532889 | 533039 | 150 MU-217  | 532861 NT                                    |      |        |     |
| TU-0377 | FWD | 532889 | 533039 | 150 MU-217  | 532866 NT                                    |      |        |     |
| TU-0378 | FWD | 534064 | 534514 | 450 MU-218  | 534032 NT                                    |      |        |     |
| TU-0379 | FWD | 533140 | 542257 | 9117 MU-219 | 533001 gcl;hyi;glxR;ybbV;ybbW;allB;ybbY;glxK | gcl  | 533140 | 139 |
| TU-0380 | FWD | 535810 | 542257 | 6447 MU-220 | 535605 glxR;ybbV;ybbW;allB;ybbY;glxK         | glxR | 535810 | 205 |
| TU-0381 | FWD | 536857 | 542257 | 5400 MU-221 | 536895 ybbW;allB;ybbY;glxK                   | ybbW | 536857 | -38 |
| TU-0382 | FWD | 541214 | 542039 | 825 MU-222  | 540988 glxK                                  | glxK | 541112 | 124 |
| TU-0383 | FWD | 545904 | 550555 | 4651 MU-223 | fdrA;yIbE;yIbF;ybcF                          | fdrA | 545904 |     |
| TU-0384 | FWD | 553814 | 555314 | 1500 MU-224 | 553800 cysS                                  | cysS | 553834 | 34  |
| TU-0385 | FWD | 557435 | 557977 | 542 MU-225  | 557392 sfmA                                  | sfmA | 557435 | 43  |
| TU-0386 | FWD | 558197 | 561523 | 3326 MU-226 | sfmC;sfmD                                    | sfmC | 558197 |     |
| TU-0387 | FWD | 561559 | 563068 | 1509 MU-227 | sfmH;sfmF                                    | sfmH | 561559 |     |
| TU-0388 | FWD | 563939 | 564139 | 200 MU-228  | 563958 argU                                  | argU | 563946 | -12 |
| TU-0389 | FWD | 563939 | 564139 | 200 MU-228  | 563959 argU                                  | argU | 563946 | -13 |
| TU-0390 | FWD | 565599 | 565999 | 400 MU-229  | 565404 peaD;renD                             | peaD | 565599 | 195 |
| TU-0391 | FWD | 566014 | 567439 | 1425 MU-230 | insE;insF;renD                               | insE | 566056 |     |
| TU-0392 | FWD | 567539 | 567839 | 300 MU-231  | 567514 emrE                                  | emrE | 567538 | 24  |
| TU-0393 | FWD | 568125 | 569651 | 1526 MU-232 | ybcK                                         | ybcK | 568125 |     |
| TU-0394 | FWD | 570141 | 571516 | 1375 MU-233 | 570094 ybcL;ybcM                             | ybcL | 570116 | 22  |
| TU-0395 | FWD | 571591 | 573093 | 1502 MU-234 | 571542 yIcH;ybcN;ninE;ybcO;rusA;yIcG         | yIcH | 571591 | 49  |
| TU-0396 | FWD | 573179 | 573562 | 383 MU-235  | 573132 quuD                                  | quuD | 573179 | 47  |
| TU-0397 | FWD | 576091 | 576449 | 358 MU-236  | 576081 NT                                    |      |        |     |
| TU-0398 | FWD | 576699 | 577274 | 575 MU-237  | 576504 essD;arrD;rzpD;rzoD                   | essD | 576621 | 117 |
| TU-0399 | FWD | 578953 | 579653 | 700 MU-238  | 578930 ybcW                                  | ybcW | 579103 | 173 |
| TU-0400 | FWD | 578953 | 579653 | 700 MU-238  | 579059 ybcW                                  | ybcW | 579103 | 44  |
| TU-0401 | FWD | 580057 | 580885 | 828 MU-239  | nohB;aaaD                                    | nohB | 580057 |     |
| TU-0402 | FWD | 580790 | 581140 | 350 MU-240  | 580819 tfaD                                  | tfaD | 580883 | 64  |
| TU-0403 | FWD | 582176 | 582358 | 182 MU-241  | tfaX                                         | tfaX | 582176 |     |
| TU-0404 | FWD | 582840 | 583815 | 975 MU-242  | appY                                         | appY | 582904 |     |

|         |     |        |        |             |                                 |      |        |      |
|---------|-----|--------|--------|-------------|---------------------------------|------|--------|------|
| TU-0405 | FWD | 585215 | 585315 | 100 MU-243  | pauD                            | pauD | 585280 |      |
| TU-0406 | FWD | 594823 | 596196 | 1373 MU-244 | 594797 cusC                     | cusC | 594823 | 26   |
| TU-0407 | FWD | 596295 | 600695 | 4400 MU-245 | 596325 cusF;cusB;cusA           | cusF | 596354 | 29   |
| TU-0408 | FWD | 601170 | 602520 | 1350 MU-246 | 601152 pheP                     | pheP | 601182 | 30   |
| TU-0409 | FWD | 607059 | 607211 | 152 MU-247  | 607066 hokE                     | hokE | 607059 | -7   |
| TU-0410 | FWD | 607245 | 608545 | 1300 MU-248 | 607179 insL                     | insL | 607288 | 109  |
| TU-0411 | FWD | 611945 | 617371 | 5426 MU-249 | 611909 fes;ybdZ;entF            | fes  | 612038 | 129  |
| TU-0412 | FWD | 617477 | 618610 | 1133 MU-250 | 617410 fepE                     | fepE | 617477 | 67   |
| TU-0413 | FWD | 621496 | 622721 | 1225 MU-251 | 621481 entS                     | entS | 621523 | 42   |
| TU-0414 | FWD | 621496 | 622721 | 1225 MU-251 | 621483 entS                     | entS | 621523 | 40   |
| TU-0415 | FWD | 624096 | 628971 | 4875 MU-252 | 624054 entC;entE;entB;entA;ybdB | entC | 624108 | 54   |
| TU-0416 | FWD | 629046 | 631996 | 2950 MU-253 | 629079 cstA;ybdD                | cstA | 629117 | 38   |
| TU-0417 | FWD | 629046 | 631996 | 2950 MU-253 | 629088 cstA;ybdD                | cstA | 629117 | 29   |
| TU-0418 | FWD | 629046 | 631996 | 2950 MU-253 | 629096 cstA;ybdD                | cstA | 629117 | 21   |
| TU-0419 | FWD | 632796 | 634146 | 1350 MU-254 | 632780 ybdL                     | ybdL | 632809 | 29   |
| TU-0420 | FWD | 632796 | 634146 | 1350 MU-254 | 632789 ybdL                     | ybdL | 632809 | 20   |
| TU-0421 | FWD | 637871 | 640549 | 2678 MU-255 | 638054 ahpC;ahpF                | ahpC | 638168 | 114  |
| TU-0422 | FWD | 637871 | 640549 | 2678 MU-255 | 638104 ahpC;ahpF                | ahpC | 638168 | 64   |
| TU-0423 | FWD | 637871 | 640549 | 2678 MU-255 | 638130 ahpC;ahpF                | ahpC | 638168 | 38   |
| TU-0424 | FWD | 637871 | 640549 | 2678 MU-255 | 638144 ahpC;ahpF                | ahpC | 638168 | 24   |
| TU-0425 | FWD | 637871 | 640549 | 2678 MU-255 | 638149 ahpC;ahpF                | ahpC | 638168 | 19   |
| TU-0426 | FWD | 637871 | 640549 | 2678 MU-255 | 638189 ahpC;ahpF                | ahpC | 638168 | -21  |
| TU-0427 | FWD | 637871 | 640549 | 2678 MU-255 | 638227 ahpC;ahpF                | ahpC | 638168 | -59  |
| TU-0428 | FWD | 641274 | 642581 | 1307 MU-256 | 641285 ybdR                     | ybdR | 641311 | 26   |
| TU-0429 | FWD | 651849 | 653724 | 1875 MU-257 | 651740 dpiB;dpiA                | dpiB | 651458 | -282 |
| TU-0430 | FWD | 655824 | 656124 | 300 MU-258  | 655710 pagP                     | pagP | 655780 | 70   |
| TU-0431 | FWD | 655824 | 656124 | 300 MU-258  | 655753 pagP                     | pagP | 655780 | 27   |
| TU-0432 | FWD | 656474 | 656799 | 325 MU-259  | 656473 cspE                     | cspE | 656515 | 42   |
| TU-0433 | FWD | 657199 | 657974 | 775 MU-260  | 657187 ybeM                     | ybeM | 657254 | 67   |
| TU-0434 | FWD | 658024 | 658374 | 350 MU-261  | 658045 tatE                     | tatE | 658170 | 125  |
| TU-0435 | FWD | 663280 | 663505 | 225 MU-262  | 663180 NT                       |      |        |      |
| TU-0436 | FWD | 663280 | 663505 | 225 MU-262  | 663285 NT                       |      |        |      |
| TU-0437 | FWD | 674180 | 674980 | 800 MU-263  | 674160 ybeL                     | ybeL | 674241 | 81   |
| TU-0438 | FWD | 674180 | 674980 | 800 MU-263  | 674216 ybeL                     | ybeL | 674241 | 25   |
| TU-0439 | FWD | 675934 | 678065 | 2131 MU-264 | ybeR;djlB                       | ybeR | 675934 |      |
| TU-0440 | FWD | 678731 | 680886 | 2155 MU-265 | 678687 ybeU;djlC                | ybeU | 678731 | 44   |
| TU-0441 | FWD | 694330 | 695630 | 1300 MU-266 | 694300 ubiF                     | ubiF | 694324 | 24   |
| TU-0442 | FWD | 695830 | 696655 | 825 MU-267  | 695655 NT                       |      |        |      |
| TU-0443 | FWD | 702680 | 705055 | 2375 MU-268 | 702830 nagE                     | nagE | 703167 | 337  |
| TU-0444 | FWD | 702680 | 705055 | 2375 MU-268 | 703063 nagE                     | nagE | 703167 | 104  |
| TU-0445 | FWD | 705180 | 707155 | 1975 MU-269 | 705222 glnS                     | glnS | 705316 | 94   |
| TU-0446 | FWD | 705180 | 707155 | 1975 MU-269 | 705283 glnS                     | glnS | 705316 | 33   |
| TU-0447 | FWD | 705180 | 707155 | 1975 MU-269 | 705286 glnS                     | glnS | 705316 | 30   |
| TU-0448 | FWD | 705180 | 707155 | 1975 MU-269 | 705301 glnS                     | glnS | 705316 | 15   |
| TU-0449 | FWD | 705180 | 707155 | 1975 MU-269 | 705309 glnS                     | glnS | 705316 | 7    |
| TU-0450 | FWD | 707557 | 709339 | 1782 MU-270 | 707487 ybfM;ybfN                | ybfM | 707557 | 70   |

|         |     |        |        |                            |                                                |      |        |     |
|---------|-----|--------|--------|----------------------------|------------------------------------------------|------|--------|-----|
| TU-0451 | FWD | 707557 | 709339 | 1782 MU-270                | 707512 ybfM;ybfN                               | ybfM | 707557 | 45  |
| TU-0452 | FWD | 709980 | 710055 | 75 MU-271                  | 710000 NT                                      |      |        |     |
| TU-0453 | FWD | 712105 | 714580 | 2475 MU-272                | 712074 seqA;pgm                                | seqA | 712210 | 136 |
| TU-0454 | FWD | 712105 | 714580 | 2475 MU-272                | 712139 seqA;pgm                                | seqA | 712210 | 71  |
| TU-0455 | FWD | 714635 | 715129 | 494 MU-273                 | 714596 ybfP                                    | ybfP | 714635 | 39  |
| TU-0456 | FWD | 715530 | 715555 | 25 MU-274                  | NT                                             |      |        |     |
| TU-0457 | FWD | 719806 | 720063 | 257 MU-275                 | ybfK                                           | ybfK | 719806 |     |
| TU-0458 | FWD | 728255 | 728655 | 400 MU-276                 | 728295 ybfA                                    | ybfA | 728357 | 62  |
| TU-0459 | FWD | 728255 | 728655 | 400 MU-276                 | 728306 ybfA                                    | ybfA | 728357 | 51  |
| TU-0460 | FWD | 728255 | 728655 | 400 MU-276                 | 728311 ybfA                                    | ybfA | 728357 | 46  |
| TU-0461 | FWD | 728755 | 733180 | 4425 MU-277                | 728572 rhsC;ybfB                               | rhsC | 728806 | 234 |
| TU-0462 | FWD | 733530 | 734305 | 775 MU-278                 | 733014 ybfO                                    | ybfO | 733356 | 342 |
| TU-0463 | FWD | 733530 | 734305 | 775 MU-278                 | 733048 ybfO                                    | ybfO | 733356 | 308 |
| TU-0464 | FWD | 734505 | 735655 | 1150 MU-279                | 734611 ybfC                                    | ybfC | 734873 | 262 |
| TU-0465 | FWD | 734505 | 735655 | 1150 MU-279                | 734641 ybfC                                    | ybfC | 734873 | 232 |
| TU-0466 | FWD | 735668 | 735922 | 254 MU-280                 | ybfQ                                           | ybfQ | 735668 |     |
| TU-0467 | FWD | 736048 | 737184 | 1136 MU-281                | ybfL                                           | ybfL | 736048 |     |
| TU-0468 | FWD | 737315 | 738076 | 761 MU-282                 | 737286 ybfD                                    | ybfD | 737315 | 29  |
| TU-0469 | FWD | 738183 | 740533 | 2350 MU-283                | 738203 ybgA;phr                                | ybgA | 738224 | 21  |
| TU-0470 | FWD | 741908 | 746408 | 4500 MU-284;MU-285         | 741851 ybgI;ybgJ;ybgK;ybgL;nei                 | ybgI | 742050 | 199 |
| TU-0471 | FWD | 741908 | 746408 | 4500 MU-284;MU-285         | 742021 ybgI;ybgJ;ybgK;ybgL;nei                 | ybgI | 742050 | 29  |
| TU-0472 | FWD | 744608 | 746408 | 1800 MU-285                | ybgL;nei                                       | ybgL | 744388 |     |
| TU-0473 | FWD | 746833 | 747633 | 800 MU-286                 | NT                                             |      |        |     |
| TU-0474 | FWD | 754158 | 764658 | 10500 MU-287;MU-288;MU-289 | 754178 sdhC;sdhD;sdhA;sdhB;sucA;sucB;sucC;sucD | sdhC | 754400 | 222 |
| TU-0475 | FWD | 754708 | 757683 | 2975 MU-288                | 754738 sdhA;sdhB                               | sdhA | 755130 | 392 |
| TU-0476 | FWD | 754708 | 757683 | 2975 MU-288                | 754745 sdhA;sdhB                               | sdhA | 755130 | 385 |
| TU-0477 | FWD | 757758 | 764658 | 6900 MU-289                | 757777 sucA;sucB;sucC;sucD                     | sucA | 757929 | 152 |
| TU-0478 | FWD | 757758 | 764658 | 6900 MU-289                | 757802 sucA;sucB;sucC;sucD                     | sucA | 757929 | 127 |
| TU-0479 | FWD | 757758 | 764658 | 6900 MU-289                | 757808 sucA;sucB;sucC;sucD                     | sucA | 757929 | 121 |
| TU-0480 | FWD | 765558 | 769633 | 4075 MU-290                | 765093 mngA;mngB                               | mngA | 765207 | 114 |
| TU-0481 | FWD | 770383 | 773258 | 2875 MU-291                | 770474 cydA;cydB                               | cydA | 770681 | 207 |
| TU-0482 | FWD | 770383 | 773258 | 2875 MU-291                | 770487 cydA;cydB                               | cydA | 770681 | 194 |
| TU-0483 | FWD | 770383 | 773258 | 2875 MU-291                | 770517 cydA;cydB                               | cydA | 770681 | 164 |
| TU-0484 | FWD | 770383 | 773258 | 2875 MU-291                | 770523 cydA;cydB                               | cydA | 770681 | 158 |
| TU-0485 | FWD | 770383 | 773258 | 2875 MU-291                | 770603 cydA;cydB                               | cydA | 770681 | 78  |
| TU-0486 | FWD | 773283 | 773583 | 300 MU-292                 | 773229 ybgT                                    | ybgT | 773419 | 190 |
| TU-0487 | FWD | 773608 | 773808 | 200 MU-293                 | ybgE                                           | ybgE | 773532 |     |
| TU-0488 | FWD | 773958 | 776708 | 2750 MU-294                | 773934 ybgC;tolQ;tolR;tolA                     | ybgC | 773975 | 41  |
| TU-0489 | FWD | 776733 | 779733 | 3000 MU-295                | 776788 tolB;pal;ybgF                           | tolB | 776963 | 175 |
| TU-0490 | FWD | 776733 | 779733 | 3000 MU-295                | 776892 tolB;pal;ybgF                           | tolB | 776963 | 71  |
| TU-0491 | FWD | 776733 | 779733 | 3000 MU-295                | 776907 tolB;pal;ybgF                           | tolB | 776963 | 56  |
| TU-0492 | FWD | 779758 | 780233 | 475 MU-296                 | 779735 lysT;valT;lysW                          | lysT | 779777 | 42  |
| TU-0493 | FWD | 780258 | 780458 | 200 MU-297                 | 780263 valZ;lysY                               | valZ | 780291 | 28  |
| TU-0494 | FWD | 780483 | 781033 | 550 MU-298                 | 780570 lysZ;lysQ                               | lysZ | 780592 | 22  |
| TU-0495 | FWD | 781258 | 782158 | 900 MU-299                 | 781226 nadA                                    | nadA | 781308 | 82  |

|         |     |        |        |                    |                                 |      |        |     |
|---------|-----|--------|--------|--------------------|---------------------------------|------|--------|-----|
| TU-0496 | FWD | 781258 | 782158 | 900 MU-299         | 781237 nadA                     | nadA | 781308 | 71  |
| TU-0497 | FWD | 781258 | 782158 | 900 MU-299         | 781283 nadA                     | nadA | 781308 | 25  |
| TU-0498 | FWD | 782183 | 783508 | 1325 MU-300        | 782246 pnuC                     | pnuC | 782389 | 143 |
| TU-0499 | FWD | 782183 | 783508 | 1325 MU-300        | 782268 pnuC                     | pnuC | 782389 | 121 |
| TU-0500 | FWD | 784833 | 786008 | 1175 MU-301        | 784815 aroG                     | aroG | 784856 | 41  |
| TU-0501 | FWD | 784833 | 786008 | 1175 MU-301        | 784821 aroG                     | aroG | 784856 | 35  |
| TU-0502 | FWD | 784833 | 786008 | 1175 MU-301        | 784826 aroG                     | aroG | 784856 | 30  |
| TU-0503 | FWD | 784833 | 786008 | 1175 MU-301        | 784830 aroG                     | aroG | 784856 | 26  |
| TU-0504 | FWD | 786933 | 786983 | 50 MU-302          | 786750 NT                       |      |        |     |
| TU-0505 | FWD | 793833 | 794133 | 300 MU-303         | 793974 ybhT                     | ybhT | 793996 | 22  |
| TU-0506 | FWD | 794308 | 796733 | 2425 MU-304        | 794219 modA;modB;modC           | modA | 794312 | 93  |
| TU-0507 | FWD | 794308 | 796733 | 2425 MU-304        | 794285 modA;modB;modC           | modA | 794312 | 27  |
| TU-0508 | FWD | 797533 | 797708 | 175 MU-305         | 797506 NT                       |      |        |     |
| TU-0509 | FWD | 797733 | 798808 | 1075 MU-306        | 797668 pgl                      | pgl  | 797809 | 141 |
| TU-0510 | FWD | 797733 | 798808 | 1075 MU-306        | 797674 pgl                      | pgl  | 797809 | 135 |
| TU-0511 | FWD | 797733 | 798808 | 1075 MU-306        | 797680 pgl                      | pgl  | 797809 | 129 |
| TU-0512 | FWD | 797733 | 798808 | 1075 MU-306        | 797778 pgl                      | pgl  | 797809 | 31  |
| TU-0513 | FWD | 799982 | 804987 | 5005 MU-307        | ybhH;ybhI;ybhJ                  | ybhH | 799982 |     |
| TU-0514 | FWD | 808504 | 812306 | 3802 MU-308        | 808524 bioB;bioF;bioC;bioD      | bioB | 808567 | 43  |
| TU-0515 | FWD | 808504 | 812306 | 3802 MU-308        | 808533 bioB;bioF;bioC;bioD      | bioB | 808567 | 34  |
| TU-0516 | FWD | 812531 | 814913 | 2382 MU-309        | 812660 uvrB                     | uvrB | 812749 | 89  |
| TU-0517 | FWD | 816090 | 819040 | 2950 MU-310;MU-311 | 816050 moaA;moaB;moaC;moaD;moaE | moaA | 816267 | 217 |
| TU-0518 | FWD | 816090 | 819040 | 2950 MU-310;MU-311 | 816137 moaA;moaB;moaC;moaD;moaE | moaA | 816267 | 130 |
| TU-0519 | FWD | 817265 | 819040 | 1775 MU-311        | 817199 moaB;moaC;moaD;moaE      | moaB | 817278 | 79  |
| TU-0520 | FWD | 817265 | 819040 | 1775 MU-311        | 817207 moaB;moaC;moaD;moaE      | moaB | 817278 | 71  |
| TU-0521 | FWD | 817265 | 819040 | 1775 MU-311        | 817223 moaB;moaC;moaD;moaE      | moaB | 817278 | 55  |
| TU-0522 | FWD | 817265 | 819040 | 1775 MU-311        | 817235 moaB;moaC;moaD;moaE      | moaB | 817278 | 43  |
| TU-0523 | FWD | 819115 | 819815 | 700 MU-312         | 819081 ybhL                     | ybhL | 819107 | 26  |
| TU-0524 | FWD | 819115 | 819815 | 700 MU-312         | 819090 ybhL                     | ybhL | 819107 | 17  |
| TU-0525 | FWD | 820016 | 820729 | 713 MU-313         | ybhM                            | ybhM | 820016 |     |
| TU-0526 | FWD | 820790 | 820890 | 100 MU-314         | NT                              |      |        |     |
| TU-0527 | FWD | 823865 | 824390 | 525 MU-315         | 823826 ybhQ                     | ybhQ | 823853 | 27  |
| TU-0528 | FWD | 830040 | 831590 | 1550 MU-316        | 830008 rhIE                     | rhIE | 830095 | 87  |
| TU-0529 | FWD | 832290 | 834290 | 2000 MU-317        | 832266 dinG                     | dinG | 832293 | 27  |
| TU-0530 | FWD | 832290 | 834290 | 2000 MU-317        | 832278 dinG                     | dinG | 832293 | 15  |
| TU-0531 | FWD | 834390 | 835421 | 1031 MU-318        | 834346 ybiB                     | ybiB | 834471 | 125 |
| TU-0532 | FWD | 834390 | 835421 | 1031 MU-318        | 834393 ybiB                     | ybiB | 834471 | 78  |
| TU-0533 | FWD | 834390 | 835421 | 1031 MU-318        | 834404 ybiB                     | ybiB | 834471 | 67  |
| TU-0534 | FWD | 835571 | 836821 | 1250 MU-319        | 835541 ybiC                     | ybiC | 835574 | 33  |
| TU-0535 | FWD | 837821 | 838296 | 475 MU-320         | 837896 NT                       |      |        |     |
| TU-0536 | FWD | 841546 | 842446 | 900 MU-321         | 841376 rlmF                     | rlmF | 841555 | 179 |
| TU-0537 | FWD | 841546 | 842446 | 900 MU-321         | 841479 rlmF                     | rlmF | 841555 | 76  |
| TU-0538 | FWD | 841546 | 842446 | 900 MU-321         | 841538 rlmF                     | rlmF | 841555 | 17  |
| TU-0539 | FWD | 849322 | 850197 | 875 MU-322         | 849434 ompX                     | ompX | 849673 | 239 |
| TU-0540 | FWD | 849322 | 850197 | 875 MU-322         | 849446 ompX                     | ompX | 849673 | 227 |
| TU-0541 | FWD | 849322 | 850197 | 875 MU-322         | 849536 ompX                     | ompX | 849673 | 137 |

|         |     |        |        |                           |                                 |      |        |     |
|---------|-----|--------|--------|---------------------------|---------------------------------|------|--------|-----|
| TU-0542 | FWD | 849322 | 850197 | 875 MU-322                | 849610 ompX                     | ompX | 849673 | 63  |
| TU-0543 | FWD | 849322 | 850197 | 875 MU-322                | 849622 ompX                     | ompX | 849673 | 51  |
| TU-0544 | FWD | 849322 | 850197 | 875 MU-322                | 849628 ompX                     | ompX | 849673 | 45  |
| TU-0545 | FWD | 849322 | 850197 | 875 MU-322                | 849640 ompX                     | ompX | 849673 | 33  |
| TU-0546 | FWD | 849322 | 850197 | 875 MU-322                | 849646 ompX                     | ompX | 849673 | 27  |
| TU-0547 | FWD | 851894 | 852163 | 269 MU-323                | yliL                            | yliL | 851894 |     |
| TU-0548 | FWD | 852322 | 854047 | 1725 MU-324               | 852360 mntR;ybiR                | mntR | 852406 | 46  |
| TU-0549 | FWD | 855122 | 856847 | 1725 MU-325               | 855156 ybiT                     | ybiT | 855186 | 30  |
| TU-0550 | FWD | 859172 | 859675 | 503 MU-326                | 859050 NT                       |      |        |     |
| TU-0551 | FWD | 859172 | 859675 | 503 MU-326                | 859134 NT                       |      |        |     |
| TU-0552 | FWD | 862900 | 863500 | 600 MU-327                | 862837 fsaA                     | fsaA | 862865 | 28  |
| TU-0553 | FWD | 865750 | 872000 | 6250 MU-328;MU-329        | 865760 iaaA;gsiA;gsiB;gsiC;gsiD | iaaA | 865791 | 31  |
| TU-0554 | FWD | 870800 | 872000 | 1200 MU-329               | 870904 gsiD                     | gsiD | 871113 | 209 |
| TU-0555 | FWD | 870800 | 872000 | 1200 MU-329               | 870945 gsiD                     | gsiD | 871113 | 168 |
| TU-0556 | FWD | 872150 | 875975 | 3825 MU-330               | 872121 yliE;yliF                | yliE | 872202 | 81  |
| TU-0557 | FWD | 872150 | 875975 | 3825 MU-330               | 872128 yliE;yliF                | yliE | 872202 | 74  |
| TU-0558 | FWD | 872150 | 875975 | 3825 MU-330               | 872170 yliE;yliF                | yliE | 872202 | 32  |
| TU-0559 | FWD | 872150 | 875975 | 3825 MU-330               | 872180 yliE;yliF                | yliE | 872202 | 22  |
| TU-0560 | FWD | 877350 | 877850 | 500 MU-331                | 877440 bssR                     | bssR | 877471 | 31  |
| TU-0561 | FWD | 877900 | 878950 | 1050 MU-332               | 877945 yliI                     | yliI | 877965 | 20  |
| TU-0562 | FWD | 879860 | 881135 | 1275 MU-333               | 879841 dacC                     | dacC | 879950 | 109 |
| TU-0563 | FWD | 879860 | 881135 | 1275 MU-333               | 879851 dacC                     | dacC | 879950 | 99  |
| TU-0564 | FWD | 879860 | 881135 | 1275 MU-333               | 879858 dacC                     | dacC | 879950 | 92  |
| TU-0565 | FWD | 879860 | 881135 | 1275 MU-333               | 879868 dacC                     | dacC | 879950 | 82  |
| TU-0566 | FWD | 879860 | 881135 | 1275 MU-333               | 879918 dacC                     | dacC | 879950 | 32  |
| TU-0567 | FWD | 882810 | 884435 | 1625 MU-334               | 882793 cmr                      | cmr  | 882896 | 103 |
| TU-0568 | FWD | 882810 | 884435 | 1625 MU-334               | 882872 cmr                      | cmr  | 882896 | 24  |
| TU-0569 | FWD | 886685 | 887185 | 500 MU-335                | 886624 ybjK                     | ybjK | 886646 | 22  |
| TU-0570 | FWD | 889154 | 889604 | 450 MU-336                | 889111 ybjM                     | ybjM | 889312 | 201 |
| TU-0571 | FWD | 890129 | 892629 | 2500 MU-337;MU-338;MU-339 | 890086 ybjC;nfsA;rimK;ybjN      | ybjC | 890136 | 50  |
| TU-0572 | FWD | 891279 | 892629 | 1350 MU-338;MU-339        | 891082 rimK;ybjN                | rimK | 891190 | 108 |
| TU-0573 | FWD | 892104 | 892629 | 525 MU-339                | 892149 ybjN                     | ybjN | 892180 | 31  |
| TU-0574 | FWD | 892879 | 897107 | 4228 MU-340               | 892867 potF;potG;potH;potI;ybjO | potF | 893007 | 140 |
| TU-0575 | FWD | 897232 | 897657 | 425 MU-341                | ybjO                            | ybjO | 897212 |     |
| TU-0576 | FWD | 897707 | 898957 | 1250 MU-342               | 897617 rumB                     | rumB | 897741 | 124 |
| TU-0577 | FWD | 903757 | 905182 | 1425 MU-343               | 903740 ybjQ;amiD                | ybjQ | 903816 | 76  |
| TU-0578 | FWD | 903757 | 905182 | 1425 MU-343               | 903746 ybjQ;amiD                | ybjQ | 903816 | 70  |
| TU-0579 | FWD | 903757 | 905182 | 1425 MU-343               | 903754 ybjQ;amiD                | ybjQ | 903816 | 62  |
| TU-0580 | FWD | 903757 | 905182 | 1425 MU-343               | 903762 ybjQ;amiD                | ybjQ | 903816 | 54  |
| TU-0581 | FWD | 903757 | 905182 | 1425 MU-343               | 903777 ybjQ;amiD                | ybjQ | 903816 | 39  |
| TU-0582 | FWD | 903757 | 905182 | 1425 MU-343               | 903793 ybjQ;amiD                | ybjQ | 903816 | 23  |
| TU-0583 | FWD | 905282 | 905907 | 625 MU-344                | 905279 NT                       |      |        |     |
| TU-0584 | FWD | 913958 | 914383 | 425 MU-345                | 913951 NT                       |      |        |     |
| TU-0585 | FWD | 915583 | 917283 | 1700 MU-346               | 915532 ybjD                     | ybjD | 915696 | 164 |
| TU-0586 | FWD | 918408 | 921085 | 2677 MU-347               | 918360 macA;macB                | macA | 918458 | 98  |
| TU-0587 | FWD | 918408 | 921085 | 2677 MU-347               | 918396 macA;macB                | macA | 918458 | 62  |

|         |     |        |        |                    |                            |      |        |      |  |
|---------|-----|--------|--------|--------------------|----------------------------|------|--------|------|--|
| TU-0588 | FWD | 921135 | 922060 | 925 MU-348         | 921139 NT                  |      |        |      |  |
| TU-0589 | FWD | 921135 | 922060 | 925 MU-348         | 921194 NT                  |      |        |      |  |
| TU-0590 | FWD | 922085 | 924898 | 2813 MU-349        | 922282 clpS;clpA           | clpS | 922136 | -146 |  |
| TU-0591 | FWD | 922085 | 924898 | 2813 MU-349        | 922314 clpS;clpA           | clpS | 922136 | -178 |  |
| TU-0592 | FWD | 922085 | 924898 | 2813 MU-349        | 922434 clpS;clpA           | clpS | 922136 | -298 |  |
| TU-0593 | FWD | 931584 | 932409 | 825 MU-350         | 931551 lrp                 | lrp  | 931818 | 267  |  |
| TU-0594 | FWD | 931584 | 932409 | 825 MU-350         | 931654 lrp                 | lrp  | 931818 | 164  |  |
| TU-0595 | FWD | 931584 | 932409 | 825 MU-350         | 931799 lrp                 | lrp  | 931818 | 19   |  |
| TU-0596 | FWD | 932434 | 936484 | 4050 MU-351        | 932358 ftsK                | ftsK | 932447 | 89   |  |
| TU-0597 | FWD | 932434 | 936484 | 4050 MU-351        | 932404 ftsK                | ftsK | 932447 | 43   |  |
| TU-0598 | FWD | 936509 | 938634 | 2125 MU-352        | 936440 lolA;rarA           | lolA | 936595 | 155  |  |
| TU-0599 | FWD | 936509 | 938634 | 2125 MU-352        | 936511 lolA;rarA           | lolA | 936595 | 84   |  |
| TU-0600 | FWD | 936509 | 938634 | 2125 MU-352        | 936551 lolA;rarA           | lolA | 936595 | 44   |  |
| TU-0601 | FWD | 938659 | 939934 | 1275 MU-353        | 938576 serS                | serS | 938651 | 75   |  |
| TU-0602 | FWD | 938659 | 939934 | 1275 MU-353        | 938624 serS                | serS | 938651 | 27   |  |
| TU-0603 | FWD | 938659 | 939934 | 1275 MU-353        | 938645 serS                | serS | 938651 | 6    |  |
| TU-0604 | FWD | 940084 | 943859 | 3775 MU-354        | 940046 dmsA;dmsB;dmsC      | dmsA | 940182 | 136  |  |
| TU-0605 | FWD | 940084 | 943859 | 3775 MU-354        | 940082 dmsA;dmsB;dmsC      | dmsA | 940182 | 100  |  |
| TU-0606 | FWD | 945084 | 946059 | 975 MU-355         | 945064 ycaD                | ycaD | 945094 | 30   |  |
| TU-0607 | FWD | 946084 | 946234 | 150 MU-356         | 946043 NT                  |      |        |      |  |
| TU-0608 | FWD | 946084 | 946234 | 150 MU-356         | 946080 NT                  |      |        |      |  |
| TU-0609 | FWD | 946452 | 947882 | 1430 MU-357        | ycaM                       | ycaM | 946452 |      |  |
| TU-0610 | FWD | 948909 | 949484 | 575 MU-358         | 948867 ycaK                | ycaK | 948891 | 24   |  |
| TU-0611 | FWD | 955961 | 956786 | 825 MU-359         | 955897 ycaP                | ycaP | 955985 | 88   |  |
| TU-0612 | FWD | 956836 | 959336 | 2500 MU-360        | 956802 serC;aroA           | serC | 956876 | 74   |  |
| TU-0613 | FWD | 956836 | 959336 | 2500 MU-360        | 956808 serC;aroA           | serC | 956876 | 68   |  |
| TU-0614 | FWD | 959636 | 960161 | 525 MU-361         | 959494 ycaL                | ycaL | 959487 | -7   |  |
| TU-0615 | FWD | 960361 | 960911 | 550 MU-362         | 960303 cmk                 | cmk  | 960424 | 121  |  |
| TU-0616 | FWD | 960361 | 960911 | 550 MU-362         | 960386 cmk                 | cmk  | 960424 | 38   |  |
| TU-0617 | FWD | 960361 | 960911 | 550 MU-362         | 960408 cmk                 | cmk  | 960424 | 16   |  |
| TU-0618 | FWD | 960936 | 963011 | 2075 MU-363        | 960944 rpsA                | rpsA | 961218 | 274  |  |
| TU-0619 | FWD | 960936 | 963011 | 2075 MU-363        | 961060 rpsA                | rpsA | 961218 | 158  |  |
| TU-0620 | FWD | 960936 | 963011 | 2075 MU-363        | 961116 rpsA                | rpsA | 961218 | 102  |  |
| TU-0621 | FWD | 963036 | 963336 | 300 MU-364         | 962867 ihfB                | ihfB | 963051 | 184  |  |
| TU-0622 | FWD | 963561 | 965037 | 1476 MU-365        | 963495 ycaI                | ycaI | 963543 | 48   |  |
| TU-0623 | FWD | 965837 | 969337 | 3500 MU-366        | 965817 msbA;lpxK;ycaQ      | msbA | 965844 | 27   |  |
| TU-0624 | FWD | 969887 | 970737 | 850 MU-367         | 969867 ycaR;kdsB           | ycaR | 969896 | 29   |  |
| TU-0625 | FWD | 970962 | 971887 | 925 MU-368         | 970942 ycbJ                | ycbJ | 970975 | 33   |  |
| TU-0626 | FWD | 972737 | 979937 | 7200 MU-369        | 972720 smtA;mukF;mukE;mukB | smtA | 972760 | 40   |  |
| TU-0627 | FWD | 980187 | 982112 | 1925 MU-370        | 980154 ycbB                | ycbB | 980270 | 116  |  |
| TU-0628 | FWD | 980187 | 982112 | 1925 MU-370        | 980247 ycbB                | ycbB | 980270 | 23   |  |
| TU-0629 | FWD | 982137 | 983687 | 1550 MU-371;MU-372 | 982054 ycbK;ycbL           | ycbK | 982298 | 244  |  |
| TU-0630 | FWD | 982137 | 983687 | 1550 MU-371;MU-372 | 982102 ycbK;ycbL           | ycbK | 982298 | 196  |  |
| TU-0631 | FWD | 982862 | 983687 | 825 MU-372         | 982798 ycbL                | ycbL | 982873 | 75   |  |
| TU-0632 | FWD | 985188 | 985413 | 225 MU-373         | 985190 NT                  |      |        |      |  |
| TU-0633 | FWD | 986467 | 986967 | 500 MU-374         | 986622 NT                  |      |        |      |  |

|         |     |         |         |                    |                                       |      |         |     |
|---------|-----|---------|---------|--------------------|---------------------------------------|------|---------|-----|
| TU-0634 | FWD | 989717  | 992442  | 2725 MU-375        | 989737 pepN                           | pepN | 989845  | 108 |
| TU-0635 | FWD | 989717  | 992442  | 2725 MU-375        | 989749 pepN                           | pepN | 989845  | 96  |
| TU-0636 | FWD | 989717  | 992442  | 2725 MU-375        | 989815 pepN                           | pepN | 989845  | 30  |
| TU-0637 | FWD | 997091  | 1003880 | 6789 MU-376        | ycbQ;ycbR;ycbS;ycbT;ycbU;ycbV;ycbF    | ycbQ | 997091  |     |
| TU-0638 | FWD | 1003968 | 1004993 | 1025 MU-377        | 1003961 pyrD                          | pyrD | 1003991 | 30  |
| TU-0639 | FWD | 1005068 | 1005793 | 725 MU-378         | 1005076 ycbW                          | ycbW | 1005175 | 99  |
| TU-0640 | FWD | 1006918 | 1010893 | 3975 MU-379        | 1006895 rlmL;uup                      | rlmL | 1007067 | 172 |
| TU-0641 | FWD | 1006918 | 1010893 | 3975 MU-379        | 1006926 rlmL;uup                      | rlmL | 1007067 | 141 |
| TU-0642 | FWD | 1006918 | 1010893 | 3975 MU-379        | 1006929 rlmL;uup                      | rlmL | 1007067 | 138 |
| TU-0643 | FWD | 1006918 | 1010893 | 3975 MU-379        | 1007025 rlmL;uup                      | rlmL | 1007067 | 42  |
| TU-0644 | FWD | 1010918 | 1014643 | 3725 MU-380        | 1010883 pqiA;pqiB;ymbA                | pqiA | 1011224 | 341 |
| TU-0645 | FWD | 1010918 | 1014643 | 3725 MU-380        | 1010988 pqiA;pqiB;ymbA                | pqiA | 1011224 | 236 |
| TU-0646 | FWD | 1014793 | 1015293 | 500 MU-381         | 1014873 rmf                           | rmf  | 1014938 | 65  |
| TU-0647 | FWD | 1014793 | 1015293 | 500 MU-381         | 1014882 rmf                           | rmf  | 1014938 | 56  |
| TU-0648 | FWD | 1014793 | 1015293 | 500 MU-381         | 1014905 rmf                           | rmf  | 1014938 | 33  |
| TU-0649 | FWD | 1017718 | 1018143 | 425 MU-382         | 1017682 ycbG                          | ycbG | 1017708 | 26  |
| TU-0650 | FWD | 1019543 | 1020118 | 575 MU-383         | 1019566 NT                            |      |         |     |
| TU-0651 | FWD | 1020368 | 1021018 | 650 MU-384         | 1020306 sxy                           | sxy  | 1020361 | 55  |
| TU-0652 | FWD | 1023693 | 1025743 | 2050 MU-385        | 1023665 helD                          | helD | 1023694 | 29  |
| TU-0653 | FWD | 1026993 | 1027661 | 668 MU-386         | 1027106 yccU                          | yccU | 1027169 | 63  |
| TU-0654 | FWD | 1026993 | 1027661 | 668 MU-386         | 1027150 yccU                          | yccU | 1027169 | 19  |
| TU-0655 | FWD | 1029186 | 1029737 | 551 MU-387         | 1029195 yccX                          | yccX | 1029287 | 92  |
| TU-0656 | FWD | 1029186 | 1029737 | 551 MU-387         | 1029201 yccX                          | yccX | 1029287 | 86  |
| TU-0657 | FWD | 1030712 | 1030787 | 75 MU-388          | 1030656 NT                            |      |         |     |
| TU-0658 | FWD | 1031212 | 1036362 | 5150 MU-389        | 1031208 hyaA;hyaB;hyaC;hyaD;hyaE;hyaF | hyaA | 1031362 | 154 |
| TU-0659 | FWD | 1036962 | 1041237 | 4275 MU-390;MU-391 | 1036930 appC;appB;yccB;appA           | appC | 1036963 | 33  |
| TU-0660 | FWD | 1039862 | 1041237 | 1375 MU-391        | 1039819 appA                          | appA | 1039840 | 21  |
| TU-0661 | FWD | 1049037 | 1049937 | 900 MU-392         | 1049039 insA;insB                     | insA | 1049056 | 17  |
| TU-0662 | FWD | 1050684 | 1050896 | 212 MU-393         | 1050625 cspG                          | cspG | 1050684 | 59  |
| TU-0663 | FWD | 1051070 | 1051300 | 230 MU-394         | ymcE                                  | ymcE | 1051070 |     |
| TU-0664 | FWD | 1051237 | 1051562 | 325 MU-395         | 1051218 gnsA                          | gnsA | 1051290 | 72  |
| TU-0665 | FWD | 1055512 | 1056287 | 775 MU-396         | torT                                  | torT | 1055484 |     |
| TU-0666 | FWD | 1057487 | 1061362 | 3875 MU-397;MU-398 | 1057130 torC;torA;torD                | torC | 1057307 | 177 |
| TU-0667 | FWD | 1060837 | 1061362 | 525 MU-398         | 1060747 torD                          | torD | 1061022 | 275 |
| TU-0668 | FWD | 1063259 | 1064515 | 1256 MU-399        | 1063246 yccE                          | yccE | 1063259 | 13  |
| TU-0669 | FWD | 1064812 | 1066037 | 1225 MU-400        | 1064782 agp                           | agp  | 1064808 | 26  |
| TU-0670 | FWD | 1067262 | 1067687 | 425 MU-401         | 1067262 ymdF                          | ymdF | 1067304 | 42  |
| TU-0671 | FWD | 1073387 | 1074087 | 700 MU-402         | 1073321 rutR                          | rutR | 1073465 | 144 |
| TU-0672 | FWD | 1073387 | 1074087 | 700 MU-402         | 1073443 rutR                          | rutR | 1073465 | 22  |
| TU-0673 | FWD | 1078312 | 1080287 | 1975 MU-403        | 1078392 putP                          | putP | 1078528 | 136 |
| TU-0674 | FWD | 1078312 | 1080287 | 1975 MU-403        | 1078447 putP                          | putP | 1078528 | 81  |
| TU-0675 | FWD | 1078312 | 1080287 | 1975 MU-403        | 1078512 putP                          | putP | 1078528 | 16  |
| TU-0676 | FWD | 1080537 | 1083912 | 3375 MU-404        | 1080520 efeU;efeO;efeB                | efeU | 1080579 | 59  |
| TU-0677 | FWD | 1080537 | 1083912 | 3375 MU-404        | 1080533 efeU;efeO;efeB                | efeU | 1080579 | 46  |
| TU-0678 | FWD | 1084187 | 1085287 | 1100 MU-405        | 1084120 phoH                          | phoH | 1084215 | 95  |
| TU-0679 | FWD | 1084187 | 1085287 | 1100 MU-405        | 1084166 phoH                          | phoH | 1084215 | 49  |

|         |     |         |         |                    |                                  |      |         |      |
|---------|-----|---------|---------|--------------------|----------------------------------|------|---------|------|
| TU-0680 | FWD | 1092112 | 1093162 | 1050 MU-406        | 1092062 ycdT                     | ycdT | 1092099 | 37   |
| TU-0681 | FWD | 1092112 | 1093162 | 1050 MU-406        | 1092067 ycdT                     | ycdT | 1092099 | 32   |
| TU-0682 | FWD | 1093412 | 1093887 | 475 MU-407         | 1093229 NT                       |      |         |      |
| TU-0683 | FWD | 1094728 | 1095069 | 341 MU-408         | ymdE                             | ymdE | 1094728 |      |
| TU-0684 | FWD | 1095066 | 1096052 | 986 MU-409         | ycdU                             | ycdU | 1095066 |      |
| TU-0685 | FWD | 1097012 | 1099412 | 2400 MU-410;MU-411 | 1096981 ghrA;ycdX;ycdY           | ghrA | 1097109 | 128  |
| TU-0686 | FWD | 1097012 | 1099412 | 2400 MU-410;MU-411 | 1096990 ghrA;ycdX;ycdY           | ghrA | 1097109 | 119  |
| TU-0687 | FWD | 1097012 | 1099412 | 2400 MU-410;MU-411 | 1097010 ghrA;ycdX;ycdY           | ghrA | 1097109 | 99   |
| TU-0688 | FWD | 1097012 | 1099412 | 2400 MU-410;MU-411 | 1097049 ghrA;ycdX;ycdY           | ghrA | 1097109 | 60   |
| TU-0689 | FWD | 1097012 | 1099412 | 2400 MU-410;MU-411 | 1097057 ghrA;ycdX;ycdY           | ghrA | 1097109 | 52   |
| TU-0690 | FWD | 1098187 | 1099412 | 1225 MU-411        | 1098081 ycdX;ycdY                | ycdX | 1098102 | 21   |
| TU-0691 | FWD | 1099462 | 1099987 | 525 MU-412         | 1099336 ycdZ                     | ycdZ | 1099519 | 183  |
| TU-0692 | FWD | 1099462 | 1099987 | 525 MU-412         | 1099405 ycdZ                     | ycdZ | 1099519 | 114  |
| TU-0693 | FWD | 1103174 | 1104948 | 1774 MU-413        | csgB;csgA;csgC;ymdA              | csgB | 1103174 |      |
| TU-0694 | FWD | 1103590 | 1104015 | 425 MU-414         | 1103559 csgA                     | csgA | 1103670 | 111  |
| TU-0695 | FWD | 1105040 | 1107190 | 2150 MU-415        | 1105020 ymdB;ymdC                | ymdB | 1105043 | 23   |
| TU-0696 | FWD | 1108465 | 1112740 | 4275 MU-416        | 1108478 mdoG;mdoH                | mdoG | 1108558 | 80   |
| TU-0697 | FWD | 1108465 | 1112740 | 4275 MU-416        | 1108501 mdoG;mdoH                | mdoG | 1108558 | 57   |
| TU-0698 | FWD | 1112802 | 1113029 | 227 MU-417         | yceK                             | yceK | 1112802 |      |
| TU-0699 | FWD | 1116015 | 1117065 | 1050 MU-418        | 1115959 yceA                     | yceA | 1116030 | 71   |
| TU-0700 | FWD | 1116015 | 1117065 | 1050 MU-418        | 1115994 yceA                     | yceA | 1116030 | 36   |
| TU-0701 | FWD | 1124722 | 1128573 | 3851 MU-419;MU-420 | 1124698 rimJ;yceH;yceM;yceN      | rimJ | 1124785 | 87   |
| TU-0702 | FWD | 1124722 | 1128573 | 3851 MU-419;MU-420 | 1124706 rimJ;yceH;yceM;yceN      | rimJ | 1124785 | 79   |
| TU-0703 | FWD | 1127047 | 1128573 | 1526 MU-420        | 1127058 yceN                     | yceN | 1127062 | 4    |
| TU-0704 | FWD | 1130241 | 1133780 | 3539 MU-421        | 1130215 flgB;flgC;flgD;flgE;flgF | flgB | 1130241 | 26   |
| TU-0705 | FWD | 1130241 | 1133780 | 3539 MU-421        | 1130271 flgB;flgC;flgD;flgE;flgF | flgB | 1130241 | -30  |
| TU-0706 | FWD | 1133952 | 1137535 | 3583 MU-422        | 1133923 flgG;flgH;flgI;flgJ      | flgG | 1133952 | 29   |
| TU-0707 | FWD | 1137628 | 1140103 | 2475 MU-423        | 1137576 flgK;flgL                | flgK | 1137601 | 25   |
| TU-0708 | FWD | 1143725 | 1144045 | 320 MU-424         | yceQ                             | yceQ | 1143725 |      |
| TU-0709 | FWD | 1144129 | 1145104 | 975 MU-425         | 1144163 rluC                     | rluC | 1144163 | 0    |
| TU-0710 | FWD | 1145829 | 1145904 | 75 MU-426          | 1145813 psrD                     | psrD | 1145812 | -1   |
| TU-0711 | FWD | 1145929 | 1146604 | 675 MU-427         | 1145871 yceD;rpmF                | yceD | 1146017 | 146  |
| TU-0712 | FWD | 1145929 | 1146604 | 675 MU-427         | 1145942 yceD;rpmF                | yceD | 1146017 | 75   |
| TU-0713 | FWD | 1145929 | 1146604 | 675 MU-427         | 1146015 yceD;rpmF                | yceD | 1146017 | 2    |
| TU-0714 | FWD | 1146629 | 1146854 | 225 MU-428         | 1146523 rpmF;plsX;fabH;fabD;fabG | rpmF | 1146590 | 67   |
| TU-0715 | FWD | 1146629 | 1146854 | 225 MU-428         | 1146530 rpmF;plsX;fabH;fabD;fabG | rpmF | 1146590 | 60   |
| TU-0716 | FWD | 1146629 | 1146854 | 225 MU-428         | 1146538 rpmF;plsX;fabH;fabD;fabG | rpmF | 1146590 | 52   |
| TU-0717 | FWD | 1146629 | 1146854 | 225 MU-428         | 1146573 rpmF;plsX;fabH;fabD;fabG | rpmF | 1146590 | 17   |
| TU-0718 | FWD | 1146879 | 1147629 | 750 MU-429         | 1146994 rpmF;plsX;fabH;fabD;fabG | rpmF | 1146590 | -404 |
| TU-0719 | FWD | 1147654 | 1150755 | 3101 MU-430        | 1147191 fabH;fabD;fabG           | fabH | 1147982 | 791  |
| TU-0720 | FWD | 1147654 | 1150755 | 3101 MU-430        | 1147299 fabH;fabD;fabG           | fabH | 1147982 | 683  |
| TU-0721 | FWD | 1147654 | 1150755 | 3101 MU-430        | 1147410 fabH;fabD;fabG           | fabH | 1147982 | 572  |
| TU-0722 | FWD | 1150780 | 1151080 | 300 MU-431         | 1150734 acpP;fabF                | acpP | 1150838 | 104  |
| TU-0723 | FWD | 1150780 | 1151080 | 300 MU-431         | 1150759 acpP;fabF                | acpP | 1150838 | 79   |
| TU-0724 | FWD | 1150780 | 1151080 | 300 MU-431         | 1150772 acpP;fabF                | acpP | 1150838 | 66   |
| TU-0725 | FWD | 1150780 | 1151080 | 300 MU-431         | 1150783 acpP;fabF                | acpP | 1150838 | 55   |



|         |     |         |         |                           |                                                 |       |         |     |
|---------|-----|---------|---------|---------------------------|-------------------------------------------------|-------|---------|-----|
| TU-0726 | FWD | 1150780 | 1151080 | 300 MU-431                | 1150791 acpP;fabF                               | acpP  | 1150838 | 47  |
| TU-0727 | FWD | 1150780 | 1151080 | 300 MU-431                | 1150799 acpP;fabF                               | acpP  | 1150838 | 39  |
| TU-0728 | FWD | 1150780 | 1151080 | 300 MU-431                | 1150828 acpP;fabF                               | acpP  | 1150838 | 10  |
| TU-0729 | FWD | 1151105 | 1152380 | 1275 MU-432               | 1151079 fabF                                    | fabF  | 1151162 | 83  |
| TU-0730 | FWD | 1151105 | 1152380 | 1275 MU-432               | 1151133 fabF                                    | fabF  | 1151162 | 29  |
| TU-0731 | FWD | 1152530 | 1156780 | 4250 MU-433;MU-434        | 1152502 pabC;yceG;tmk;holB;ycfH                 | pabC  | 1152523 | 21  |
| TU-0732 | FWD | 1154230 | 1156780 | 2550 MU-434               | 1154242 tmk;holB;ycfH                           | tmk   | 1154347 | 105 |
| TU-0733 | FWD | 1154230 | 1156780 | 2550 MU-434               | 1154281 tmk;holB;ycfH                           | tmk   | 1154347 | 66  |
| TU-0734 | FWD | 1156805 | 1158530 | 1725 MU-435               | 1156852 ptsG                                    | ptsG  | 1157092 | 240 |
| TU-0735 | FWD | 1156805 | 1158530 | 1725 MU-435               | 1156960 ptsG                                    | ptsG  | 1157092 | 132 |
| TU-0736 | FWD | 1156805 | 1158530 | 1725 MU-435               | 1156971 ptsG                                    | ptsG  | 1157092 | 121 |
| TU-0737 | FWD | 1156805 | 1158530 | 1725 MU-435               | 1156977 ptsG                                    | ptsG  | 1157092 | 115 |
| TU-0738 | FWD | 1156805 | 1158530 | 1725 MU-435               | 1156990 ptsG                                    | ptsG  | 1157092 | 102 |
| TU-0739 | FWD | 1161055 | 1164905 | 3850 MU-436;MU-437;MU-438 | 1161048 hinT;ycfL;ycfM;thiK;nagZ;ycfP           | hinT  | 1161108 | 60  |
| TU-0740 | FWD | 1161055 | 1164905 | 3850 MU-436;MU-437;MU-438 | 1161078 hinT;ycfL;ycfM;thiK;nagZ;ycfP           | hinT  | 1161108 | 30  |
| TU-0741 | FWD | 1161055 | 1164905 | 3850 MU-436;MU-437;MU-438 | 1161086 hinT;ycfL;ycfM;thiK;nagZ;ycfP           | hinT  | 1161108 | 22  |
| TU-0742 | FWD | 1163055 | 1164905 | 1850 MU-437;MU-438        | 1163108 nagZ;ycfP                               | nagZ  | 1163318 | 210 |
| TU-0743 | FWD | 1163055 | 1164905 | 1850 MU-437;MU-438        | 1163203 nagZ;ycfP                               | nagZ  | 1163318 | 115 |
| TU-0744 | FWD | 1164280 | 1164905 | 625 MU-438                | 1164238 ycfP                                    | ycfP  | 1164366 | 128 |
| TU-0745 | FWD | 1165305 | 1166605 | 1300 MU-439               | 1165249 ndh                                     | ndh   | 1165308 | 59  |
| TU-0746 | FWD | 1165305 | 1166605 | 1300 MU-439               | 1165275 ndh                                     | ndh   | 1165308 | 33  |
| TU-0747 | FWD | 1166830 | 1167355 | 525 MU-440                | 1166736 ycfJ                                    | ycfJ  | 1166822 | 86  |
| TU-0748 | FWD | 1168180 | 1168580 | 400 MU-441                | 1168242 bhsA                                    | bhsA  | 1168296 | 54  |
| TU-0749 | FWD | 1174655 | 1177180 | 2525 MU-442               | 1174623 lolC;lolD;lolE                          | lolC  | 1174650 | 27  |
| TU-0750 | FWD | 1177205 | 1179705 | 2500 MU-443               | 1177461 nagK;cobB                               | nagK  | 1177816 | 355 |
| TU-0751 | FWD | 1177205 | 1179705 | 2500 MU-443               | 1177640 nagK;cobB                               | nagK  | 1177816 | 176 |
| TU-0752 | FWD | 1184987 | 1186362 | 1375 MU-444               | 1184963 pepT                                    | pepT  | 1185067 | 104 |
| TU-0753 | FWD | 1184987 | 1186362 | 1375 MU-444               | 1185028 pepT                                    | pepT  | 1185067 | 39  |
| TU-0754 | FWD | 1184987 | 1186362 | 1375 MU-444               | 1185046 pepT                                    | pepT  | 1185067 | 21  |
| TU-0755 | FWD | 1194216 | 1195901 | 1685 MU-445               | 1194184 icd                                     | icd   | 1194346 | 162 |
| TU-0756 | FWD | 1194216 | 1195901 | 1685 MU-445               | 1194193 icd                                     | icd   | 1194346 | 153 |
| TU-0757 | FWD | 1194216 | 1195901 | 1685 MU-445               | 1194231 icd                                     | icd   | 1194346 | 115 |
| TU-0758 | FWD | 1194216 | 1195901 | 1685 MU-445               | 1194325 icd                                     | icd   | 1194346 | 21  |
| TU-0759 | FWD | 1194216 | 1195901 | 1685 MU-445               | 1194242 icd                                     | icd   | 1194346 | 104 |
| TU-0760 | FWD | 1195937 | 1196009 | 72 MU-446                 | C0293                                           | C0293 | 1195937 |     |
| TU-0761 | FWD | 1197826 | 1198526 | 700 MU-447                | 1197892 lit                                     | lit   | 1197918 | 26  |
| TU-0762 | FWD | 1200701 | 1201026 | 325 MU-448                | 1200691 ymfI                                    | ymfI  | 1200720 | 29  |
| TU-0763 | FWD | 1202247 | 1206720 | 4473 MU-449               | 1202232 ymfT;ymfL;ymfM;ymfN;ymfR;ymfO;ymfP;ymfQ | ymfT  | 1202247 | 15  |
| TU-0764 | FWD | 1206724 | 1207768 | 1044 MU-450               | ycfK;ymfS                                       | ycfK  | 1206724 |     |
| TU-0765 | FWD | 1208908 | 1209462 | 554 MU-451                | pinE                                            | pinE  | 1208908 |     |
| TU-0766 | FWD | 1209569 | 1210402 | 833 MU-452                | 1209545 mcrA                                    | mcrA  | 1209569 | 24  |
| TU-0767 | FWD | 1210668 | 1210793 | 125 MU-453                | 1210545 icdC                                    | icdC  | 1210636 | 91  |
| TU-0768 | FWD | 1214994 | 1216319 | 1325 MU-454               | 1214975 ycgZ;ymgA;ariR;ymgC                     | ycgZ  | 1215012 | 37  |
| TU-0769 | FWD | 1214994 | 1216319 | 1325 MU-454               | 1214994 ycgZ;ymgA;ariR;ymgC                     | ycgZ  | 1215012 | 18  |
| TU-0770 | FWD | 1216519 | 1217094 | 575 MU-455                | 1216355 ycgG                                    | ycgG  | 1216551 | 196 |

|         |     |         |         |                    |                             |       |         |      |
|---------|-----|---------|---------|--------------------|-----------------------------|-------|---------|------|
| TU-0771 | FWD | 1218206 | 1218424 | 218 MU-456         | ymgF                        | ymgF  | 1218206 |      |
| TU-0772 | FWD | 1219019 | 1219569 | 550 MU-457         | 1218588 ycgH                | ycgH  | 1218824 | 236  |
| TU-0773 | FWD | 1219919 | 1221419 | 1500 MU-458        | 1219841 NT                  |       |         |      |
| TU-0774 | FWD | 1222487 | 1222672 | 185 MU-459         | ymgJ                        | ymgJ  | 1222487 |      |
| TU-0775 | FWD | 1222844 | 1223094 | 250 MU-460         | 1223002 ycgI                | ycgI  | 1222787 | -215 |
| TU-0776 | FWD | 1225744 | 1226595 | 851 MU-461         | 1225704 ycgJ                | ycgJ  | 1225823 | 119  |
| TU-0777 | FWD | 1226695 | 1227945 | 1250 MU-462        | 1226908 ycgL;ycgM           | ycgL  | 1226904 | -4   |
| TU-0778 | FWD | 1227970 | 1228545 | 575 MU-463         | 1227925 ycgN                | ycgN  | 1228038 | 113  |
| TU-0779 | FWD | 1227970 | 1228545 | 575 MU-463         | 1228020 ycgN                | ycgN  | 1228038 | 18   |
| TU-0780 | FWD | 1227970 | 1228545 | 575 MU-463         | 1228027 ycgN                | ycgN  | 1228038 | 11   |
| TU-0781 | FWD | 1229920 | 1232345 | 2425 MU-464        | 1230085 C0299;umuD;umuC     | C0299 | 1229852 | -233 |
| TU-0782 | FWD | 1234145 | 1234870 | 725 MU-465         | 1234128 fadR                | fadR  | 1234161 | 33   |
| TU-0783 | FWD | 1234145 | 1234870 | 725 MU-465         | 1234136 fadR                | fadR  | 1234161 | 25   |
| TU-0784 | FWD | 1236770 | 1239220 | 2450 MU-466        | 1236748 dadA;dadX           | dadA  | 1236794 | 46   |
| TU-0785 | FWD | 1236770 | 1239220 | 2450 MU-466        | 1236754 dadA;dadX           | dadA  | 1236794 | 40   |
| TU-0786 | FWD | 1236770 | 1239220 | 2450 MU-466        | 1236762 dadA;dadX           | dadA  | 1236794 | 32   |
| TU-0787 | FWD | 1241270 | 1241770 | 500 MU-467         | 1241244 NT                  |       |         |      |
| TU-0788 | FWD | 1242370 | 1243070 | 700 MU-468         | 1242351 emtA                | emtA  | 1242403 | 52   |
| TU-0789 | FWD | 1242370 | 1243070 | 700 MU-468         | 1242388 emtA                | emtA  | 1242403 | 15   |
| TU-0790 | FWD | 1243920 | 1244220 | 300 MU-469         | 1243901 ymgE                | ymgE  | 1243951 | 50   |
| TU-0791 | FWD | 1243920 | 1244220 | 300 MU-469         | 1243934 ymgE                | ymgE  | 1243951 | 17   |
| TU-0792 | FWD | 1244270 | 1244649 | 379 MU-470         | ycgY                        | ycgY  | 1244383 |      |
| TU-0793 | FWD | 1250249 | 1252174 | 1925 MU-471        | 1250212 dhaR                | dhaR  | 1250289 | 77   |
| TU-0794 | FWD | 1250249 | 1252174 | 1925 MU-471        | 1250224 dhaR                | dhaR  | 1250289 | 65   |
| TU-0795 | FWD | 1257924 | 1258624 | 700 MU-472         | 1257889 ychH                | ychH  | 1258014 | 125  |
| TU-0796 | FWD | 1257924 | 1258624 | 700 MU-472         | 1257939 ychH                | ychH  | 1258014 | 75   |
| TU-0797 | FWD | 1257924 | 1258624 | 700 MU-472         | 1257961 ychH                | ychH  | 1258014 | 53   |
| TU-0798 | FWD | 1257924 | 1258624 | 700 MU-472         | 1257999 ychH                | ychH  | 1258014 | 15   |
| TU-0799 | FWD | 1262849 | 1266299 | 3450 MU-473        | 1262806 hemA;prfA;prmC;ychQ | hemA  | 1262937 | 131  |
| TU-0800 | FWD | 1262849 | 1266299 | 3450 MU-473        | 1262898 hemA;prfA;prmC;ychQ | hemA  | 1262937 | 39   |
| TU-0801 | FWD | 1266399 | 1268499 | 2100 MU-474;MU-475 | 1266404 ychA;kdsA           | ychA  | 1266543 | 139  |
| TU-0802 | FWD | 1266399 | 1268499 | 2100 MU-474;MU-475 | 1266413 ychA;kdsA           | ychA  | 1266543 | 130  |
| TU-0803 | FWD | 1267174 | 1268499 | 1325 MU-475        | 1267041 kdsA                | kdsA  | 1267388 | 347  |
| TU-0804 | FWD | 1267174 | 1268499 | 1325 MU-475        | 1267079 kdsA                | kdsA  | 1267388 | 309  |
| TU-0805 | FWD | 1267174 | 1268499 | 1325 MU-475        | 1267253 kdsA                | kdsA  | 1267388 | 135  |
| TU-0806 | FWD | 1267174 | 1268499 | 1325 MU-475        | 1267259 kdsA                | kdsA  | 1267388 | 129  |
| TU-0807 | FWD | 1267174 | 1268499 | 1325 MU-475        | 1267374 kdsA                | kdsA  | 1267388 | 14   |
| TU-0808 | FWD | 1268546 | 1268612 | 66 MU-476          | rdIA                        | rdIA  | 1268546 |      |
| TU-0809 | FWD | 1269081 | 1269146 | 65 MU-477          | rdIB                        | rdIB  | 1269081 |      |
| TU-0810 | FWD | 1269616 | 1269683 | 67 MU-478          | rdIC                        | rdIC  | 1269616 |      |
| TU-0811 | FWD | 1271274 | 1271524 | 250 MU-479         | 1271318 chaB                | chaB  | 1271342 | 24   |
| TU-0812 | FWD | 1271549 | 1272524 | 975 MU-480         | 1271647 chaC                | chaC  | 1271730 | 83   |
| TU-0813 | FWD | 1271549 | 1272524 | 975 MU-480         | 1271652 chaC                | chaC  | 1271730 | 78   |
| TU-0814 | FWD | 1273000 | 1274300 | 1300 MU-481        | 1272845 ychO                | ychO  | 1273007 | 162  |
| TU-0815 | FWD | 1273000 | 1274300 | 1300 MU-481        | 1272970 ychO                | ychO  | 1273007 | 37   |
| TU-0816 | FWD | 1273000 | 1274300 | 1300 MU-481        | 1272976 ychO                | ychO  | 1273007 | 31   |

|         |     |         |         |                    |                                  |      |         |      |
|---------|-----|---------|---------|--------------------|----------------------------------|------|---------|------|
| TU-0817 | FWD | 1277200 | 1278675 | 1475 MU-482        | narK                             | narK | 1277180 |      |
| TU-0818 | FWD | 1277200 | 1278675 | 1475 MU-482        | narK                             | narK | 1277180 |      |
| TU-0819 | FWD | 1279050 | 1284550 | 5500 MU-483        | 1279048 narG;narH;narJ;narI      | narG | 1279087 | 39   |
| TU-0820 | FWD | 1285932 | 1286207 | 275 MU-484         | ychS                             | ychS | 1285932 |      |
| TU-0821 | FWD | 1288250 | 1290600 | 2350 MU-485;MU-486 | 1288329 rssA;rssB                | rssA | 1288429 | 100  |
| TU-0822 | FWD | 1288250 | 1290600 | 2350 MU-485;MU-486 | 1288358 rssA;rssB                | rssA | 1288429 | 71   |
| TU-0823 | FWD | 1289375 | 1290600 | 1225 MU-486        | 1289379 rssB                     | rssB | 1289465 | 86   |
| TU-0824 | FWD | 1289375 | 1290600 | 1225 MU-486        | 1289443 rssB                     | rssB | 1289465 | 22   |
| TU-0825 | FWD | 1290625 | 1291575 | 950 MU-487         | 1290544 galU                     | galU | 1290680 | 136  |
| TU-0826 | FWD | 1290625 | 1291575 | 950 MU-487         | 1290550 galU                     | galU | 1290680 | 130  |
| TU-0827 | FWD | 1290625 | 1291575 | 950 MU-487         | 1290557 galU                     | galU | 1290680 | 123  |
| TU-0828 | FWD | 1290625 | 1291575 | 950 MU-487         | 1290562 galU                     | galU | 1290680 | 118  |
| TU-0829 | FWD | 1290625 | 1291575 | 950 MU-487         | 1290568 galU                     | galU | 1290680 | 112  |
| TU-0830 | FWD | 1290625 | 1291575 | 950 MU-487         | 1290586 galU                     | galU | 1290680 | 94   |
| TU-0831 | FWD | 1290625 | 1291575 | 950 MU-487         | 1290629 galU                     | galU | 1290680 | 51   |
| TU-0832 | FWD | 1290625 | 1291575 | 950 MU-487         | 1290637 galU                     | galU | 1290680 | 43   |
| TU-0833 | FWD | 1290625 | 1291575 | 950 MU-487         | 1290644 galU                     | galU | 1290680 | 36   |
| TU-0834 | FWD | 1290625 | 1291575 | 950 MU-487         | 1290649 galU                     | galU | 1290680 | 31   |
| TU-0835 | FWD | 1290625 | 1291575 | 950 MU-487         | 1290675 galU                     | galU | 1290680 | 5    |
| TU-0836 | FWD | 1292750 | 1293375 | 625 MU-488         | 1292716 tdk                      | tdk  | 1292750 | 34   |
| TU-0837 | FWD | 1297825 | 1298325 | 500 MU-489         | 1297634 ychE                     | ychE | 1297821 | 187  |
| TU-0838 | FWD | 1298726 | 1299001 | 275 MU-490         | 1298695 NT                       |      |         |      |
| TU-0839 | FWD | 1299026 | 1304726 | 5700 MU-491;MU-492 | 1299035 oppA;oppB;oppC;oppD;oppF | oppA | 1299206 | 171  |
| TU-0840 | FWD | 1299026 | 1304726 | 5700 MU-491;MU-492 | 1299087 oppA;oppB;oppC;oppD;oppF | oppA | 1299206 | 119  |
| TU-0841 | FWD | 1299026 | 1304726 | 5700 MU-491;MU-492 | 1299100 oppA;oppB;oppC;oppD;oppF | oppA | 1299206 | 106  |
| TU-0842 | FWD | 1299026 | 1304726 | 5700 MU-491;MU-492 | 1299154 oppA;oppB;oppC;oppD;oppF | oppA | 1299206 | 52   |
| TU-0843 | FWD | 1301126 | 1304726 | 3600 MU-492        | 1301158 oppB;oppC;oppD;oppF      | oppB | 1300923 | -235 |
| TU-0844 | FWD | 1301126 | 1304726 | 3600 MU-492        | 1301186 oppB;oppC;oppD;oppF      | oppB | 1300923 | -263 |
| TU-0845 | FWD | 1306751 | 1307101 | 350 MU-493         | 1306787 yciY                     | yciY | 1306812 | 25   |
| TU-0846 | FWD | 1309101 | 1309826 | 725 MU-494         | 1309082 tonB                     | tonB | 1309113 | 31   |
| TU-0847 | FWD | 1309101 | 1309826 | 725 MU-494         | 1309102 tonB                     | tonB | 1309113 | 11   |
| TU-0848 | FWD | 1312001 | 1312676 | 675 MU-495         | 1312015 ompW                     | ompW | 1312044 | 29   |
| TU-0849 | FWD | 1321227 | 1321802 | 575 MU-496         | 1321212 trpH                     | trpH | 1321244 | 32   |
| TU-0850 | FWD | 1321827 | 1322877 | 1050 MU-497        | 1321789 yciO                     | yciO | 1322122 | 333  |
| TU-0851 | FWD | 1323252 | 1324102 | 850 MU-498         | yciQ                             | yciQ | 1322770 |      |
| TU-0852 | FWD | 1324352 | 1324677 | 325 MU-499         | 1324321 NT                       |      |         |      |
| TU-0853 | FWD | 1324727 | 1325752 | 1025 MU-500        | 1324784 rluB                     | rluB | 1324876 | 92   |
| TU-0854 | FWD | 1324727 | 1325752 | 1025 MU-500        | 1324836 rluB                     | rluB | 1324876 | 40   |
| TU-0855 | FWD | 1327352 | 1328377 | 1025 MU-501        | 1327326 sohB                     | sohB | 1327356 | 30   |
| TU-0856 | FWD | 1328827 | 1331652 | 2825 MU-502        | 1328821 topA                     | topA | 1329072 | 251  |
| TU-0857 | FWD | 1328827 | 1331652 | 2825 MU-502        | 1328843 topA                     | topA | 1329072 | 229  |
| TU-0858 | FWD | 1328827 | 1331652 | 2825 MU-502        | 1328907 topA                     | topA | 1329072 | 165  |
| TU-0859 | FWD | 1328827 | 1331652 | 2825 MU-502        | 1329004 topA                     | topA | 1329072 | 68   |
| TU-0860 | FWD | 1331813 | 1332813 | 1000 MU-503        | 1331785 cysB                     | cysB | 1331879 | 94   |
| TU-0861 | FWD | 1331813 | 1332813 | 1000 MU-503        | 1331795 cysB                     | cysB | 1331879 | 84   |
| TU-0862 | FWD | 1331813 | 1332813 | 1000 MU-503        | 1331804 cysB                     | cysB | 1331879 | 75   |

|         |     |         |         |                    |                                                        |       |         |     |
|---------|-----|---------|---------|--------------------|--------------------------------------------------------|-------|---------|-----|
| TU-0863 | FWD | 1333138 | 1333613 | 475 MU-504         | 1333102 ymiA;yciX                                      | ymia  | 1333184 | 82  |
| TU-0864 | FWD | 1333138 | 1333613 | 475 MU-504         | 1333114 ymiA;yciX                                      | ymia  | 1333184 | 70  |
| TU-0865 | FWD | 1333138 | 1333613 | 475 MU-504         | 1333123 ymiA;yciX                                      | ymia  | 1333184 | 61  |
| TU-0866 | FWD | 1333763 | 1336913 | 3150 MU-505        | 1333453 acnA                                           | acnA  | 1333855 | 402 |
| TU-0867 | FWD | 1333763 | 1336913 | 3150 MU-505        | 1333805 acnA                                           | acnA  | 1333855 | 50  |
| TU-0868 | FWD | 1337363 | 1337938 | 575 MU-506         | 1337333 pgpB                                           | pgpB  | 1337354 | 21  |
| TU-0869 | FWD | 1337363 | 1337938 | 575 MU-506         | 1337396 pgpB                                           | pgpB  | 1337354 | -42 |
| TU-0870 | FWD | 1337963 | 1339738 | 1775 MU-507        | 1338115 yciS;yciM                                      | yciS  | 1338267 | 152 |
| TU-0871 | FWD | 1337963 | 1339738 | 1775 MU-507        | 1338159 yciS;yciM                                      | yciS  | 1338267 | 108 |
| TU-0872 | FWD | 1339813 | 1341013 | 1200 MU-508        | 1339893 pyrF;yciH                                      | pyrF  | 1339945 | 52  |
| TU-0873 | FWD | 1339813 | 1341013 | 1200 MU-508        | 1339903 pyrF;yciH                                      | pyrF  | 1339945 | 42  |
| TU-0874 | FWD | 1359115 | 1364740 | 5625 MU-509        | 1359076 puuD;puuR;puuC;puuB;puuE                       | puuD  | 1359144 | 68  |
| TU-0875 | FWD | 1359115 | 1364740 | 5625 MU-509        | 1359085 puuD;puuR;puuC;puuB;puuE                       | puuD  | 1359144 | 59  |
| TU-0876 | FWD | 1359115 | 1364740 | 5625 MU-509        | 1359092 puuD;puuR;puuC;puuB;puuE                       | puuD  | 1359144 | 52  |
| TU-0877 | FWD | 1359115 | 1364740 | 5625 MU-509        | 1359119 puuD;puuR;puuC;puuB;puuE                       | puuD  | 1359144 | 25  |
| TU-0878 | FWD | 1366090 | 1367965 | 1875 MU-510;MU-511 | 1366062 pspA;pspB;pspC;pspD;pspE                       | pspA  | 1366103 | 41  |
| TU-0879 | FWD | 1366090 | 1367965 | 1875 MU-510;MU-511 | 1366071 pspA;pspB;pspC;pspD;pspE                       | pspA  | 1366103 | 32  |
| TU-0880 | FWD | 1367715 | 1367965 | 250 MU-511         | 1367686 pspE                                           | pspE  | 1367713 | 27  |
| TU-0881 | FWD | 1368590 | 1377965 | 9375 MU-512        | ycjM;ycjN;ycjO;ycjP;ycjQ;ycjR;ycjS;ycjT;ycjU;ycjV;ompG | ycjM  | 1368240 |     |
| TU-0882 | FWD | 1382016 | 1384641 | 2625 MU-513        | 1382094 ycjX;ycjF                                      | ycjX  | 1382141 | 47  |
| TU-0883 | FWD | 1382016 | 1384641 | 2625 MU-513        | 1382105 ycjX;ycjF                                      | ycjX  | 1382141 | 36  |
| TU-0884 | FWD | 1384691 | 1386841 | 2150 MU-514        | 1384715 tyrR                                           | tyrR  | 1384744 | 29  |
| TU-0885 | FWD | 1384691 | 1386841 | 2150 MU-514        | 1384723 tyrR                                           | tyrR  | 1384744 | 21  |
| TU-0886 | FWD | 1386866 | 1388066 | 1200 MU-515        | 1386892 ycjG                                           | ycjG  | 1386954 | 62  |
| TU-0887 | FWD | 1390016 | 1390741 | 725 MU-516         | 1389971 ycjZ                                           | ycjZ  | 1390015 | 44  |
| TU-0888 | FWD | 1391016 | 1392666 | 1650 MU-517        | 1390986 mppA                                           | mppA  | 1391251 | 265 |
| TU-0889 | FWD | 1394091 | 1395266 | 1175 MU-518        | 1393945 insH                                           | insH  | 1394100 | 155 |
| TU-0890 | FWD | 1395391 | 1395841 | 450 MU-519         | 1395353 ynaJ                                           | ynaJ  | 1395389 | 36  |
| TU-0891 | FWD | 1395391 | 1395841 | 450 MU-519         | 1395364 ynaJ                                           | ynaJ  | 1395389 | 25  |
| TU-0892 | FWD | 1402717 | 1403792 | 1075 MU-520        | 1402725 abgR                                           | abgR  | 1402765 | 40  |
| TU-0893 | FWD | 1403942 | 1404742 | 800 MU-521         | 1403917 ydaL                                           | ydaL  | 1404003 | 86  |
| TU-0894 | FWD | 1403942 | 1404742 | 800 MU-521         | 1403980 ydaL                                           | ydaL  | 1404003 | 23  |
| TU-0895 | FWD | 1406017 | 1406542 | 525 MU-522         | 1406048 ydaN                                           | ydaN  | 1406074 | 26  |
| TU-0896 | FWD | 1406617 | 1407117 | 500 MU-523         | 1406499 NT                                             |       |         |     |
| TU-0897 | FWD | 1407167 | 1407242 | 75 MU-524          | 1407153 NT                                             |       |         |     |
| TU-0898 | FWD | 1407317 | 1408742 | 1425 MU-525        | 1407307 C0343;dbpA                                     | C0343 | 1407387 | 80  |
| TU-0899 | FWD | 1416695 | 1417183 | 488 MU-526         | 1416670 sieB                                           | sieB  | 1416695 | 25  |
| TU-0900 | FWD | 1418389 | 1421609 | 3220 MU-527        | 1418251 ydaS;ydaT;ydaU;ydaV;ydaW;rzpR;rzoR             | ydaS  | 1418389 | 138 |
| TU-0901 | FWD | 1421786 | 1423312 | 1526 MU-528        | 1421735 trkG                                           | trkG  | 1421806 | 71  |
| TU-0902 | FWD | 1423401 | 1424106 | 705 MU-529         | ynaK;ydaY                                              | ynaK  | 1423401 |     |
| TU-0903 | FWD | 1424478 | 1425622 | 1144 MU-530        | ynaA;lomR                                              | ynaA  | 1424478 |     |
| TU-0904 | FWD | 1427212 | 1428987 | 1775 MU-531        | lomR;stfR;tfaR                                         | lomR  | 1425413 |     |
| TU-0905 | FWD | 1429137 | 1430837 | 1700 MU-532        | 1429174 NT                                             |       |         |     |
| TU-0906 | FWD | 1431137 | 1431487 | 350 MU-533         | 1431209 NT                                             |       |         |     |
| TU-0907 | FWD | 1432488 | 1433313 | 825 MU-534         | 1432540 NT                                             |       |         |     |

|         |     |         |         |                           |                                                        |      |         |      |
|---------|-----|---------|---------|---------------------------|--------------------------------------------------------|------|---------|------|
| TU-0908 | FWD | 1435188 | 1435288 | 100 MU-535                | 1435014 micC                                           | micC | 1435145 | 131  |
| TU-0909 | FWD | 1439063 | 1439638 | 575 MU-536                | 1439047 ydbJ                                           | ydbJ | 1439082 | 35   |
| TU-0910 | FWD | 1441063 | 1444238 | 3175 MU-537;MU-538        | 1441032 ydbH;ynbE;ydbL                                 | ydbH | 1441075 | 43   |
| TU-0911 | FWD | 1441063 | 1444238 | 3175 MU-537;MU-538        | 1441046 ydbH;ynbE;ydbL                                 | ydbH | 1441075 | 29   |
| TU-0912 | FWD | 1443338 | 1444238 | 900 MU-538                | 1443593 ynbE;ydbL                                      | ynbE | 1443711 | 118  |
| TU-0913 | FWD | 1445438 | 1447063 | 1625 MU-539               | 1445367 feaB                                           | feaB | 1445543 | 176  |
| TU-0914 | FWD | 1451951 | 1460988 | 9037 MU-540;MU-541;MU-542 | paaA;paaB;paaC;paaD;paaE;paaF;paaG;paaH;paaI;paaJ;paaK | paaA | 1451951 |      |
| TU-0915 | FWD | 1459463 | 1460988 | 1525 MU-541;MU-542        | 1459465 paaJ                                           | paaJ | 1458917 | -548 |
| TU-0916 | FWD | 1460388 | 1460988 | 600 MU-542                | 1460199 paaK                                           | paaK | 1460149 | -50  |
| TU-0917 | FWD | 1461563 | 1463138 | 1575 MU-543               | 1461534 paaX;paaY                                      | paaX | 1461563 | 29   |
| TU-0918 | FWD | 1464188 | 1465863 | 1675 MU-544               | ydbA-1                                                 | ydbA | 1463416 |      |
| TU-0919 | FWD | 1465913 | 1466163 | 250 MU-545                | 1465734 NT                                             |      |         |      |
| TU-0920 | FWD | 1465913 | 1466163 | 250 MU-545                | 1465893 NT                                             |      |         |      |
| TU-0921 | FWD | 1467238 | 1469113 | 1875 MU-546               | 1467293 ydbA;insI                                      | ydbA | 1467265 | -28  |
| TU-0922 | FWD | 1469163 | 1472038 | 2875 MU-547               | 1468976 ydbA-2                                         | ydbA | 1468541 | -435 |
| TU-0923 | FWD | 1469163 | 1472038 | 2875 MU-547               | 1469073 ydbA-2                                         | ydbA | 1468541 | -532 |
| TU-0924 | FWD | 1469163 | 1472038 | 2875 MU-547               | 1469159 ydbA-2                                         | ydbA | 1468541 | -618 |
| TU-0925 | FWD | 1472238 | 1472913 | 675 MU-548                | 1472213 ydbC                                           | ydbC | 1472245 | 32   |
| TU-0926 | FWD | 1473168 | 1475474 | 2306 MU-549               | ydbD                                                   | ydbD | 1473168 |      |
| TU-0927 | FWD | 1475645 | 1480225 | 4580 MU-550               | ynbA;ynbB;ynbC;ynbD                                    | ynbA | 1475645 |      |
| TU-0928 | FWD | 1481072 | 1484999 | 3927 MU-551               | 1481038 hrpA                                           | hrpA | 1481085 | 47   |
| TU-0929 | FWD | 1485217 | 1486017 | 800 MU-552                | 1485191 ydcF                                           | ydcF | 1485259 | 68   |
| TU-0930 | FWD | 1485217 | 1486017 | 800 MU-552                | 1485228 ydcF                                           | ydcF | 1485259 | 31   |
| TU-0931 | FWD | 1486242 | 1488067 | 1825 MU-553               | 1486215 aldA                                           | aldA | 1486256 | 41   |
| TU-0932 | FWD | 1488942 | 1489617 | 675 MU-554                | 1488899 cybB                                           | cybB | 1488926 | 27   |
| TU-0933 | FWD | 1489667 | 1489967 | 300 MU-555                | 1489467 ydcA                                           | ydcA | 1489701 | 234  |
| TU-0934 | FWD | 1490143 | 1490198 | 55 MU-556                 | 1489838 sokB                                           | sokB | 1490143 | 305  |
| TU-0935 | FWD | 1490442 | 1492142 | 1700 MU-557               | 1490461 trg                                            | trg  | 1490494 | 33   |
| TU-0936 | FWD | 1493242 | 1494267 | 1025 MU-558               | 1493185 ydcJ                                           | ydcJ | 1493312 | 127  |
| TU-0937 | FWD | 1494817 | 1496527 | 1710 MU-559               | 1494803 mdoD                                           | mdoD | 1494880 | 77   |
| TU-0938 | FWD | 1496652 | 1496902 | 250 MU-560                | ydcH                                                   | ydcH | 1496675 |      |
| TU-0939 | FWD | 1496952 | 1497477 | 525 MU-561                | 1496788 rimL                                           | rimL | 1496962 | 174  |
| TU-0940 | FWD | 1498477 | 1500352 | 1875 MU-562               | 1498559 tehA;tehB                                      | tehA | 1498597 | 38   |
| TU-0941 | FWD | 1500427 | 1501355 | 928 MU-563                | 1500452 ydcL                                           | ydcL | 1500481 | 29   |
| TU-0942 | FWD | 1501530 | 1502880 | 1350 MU-564               | 1501681 ydcM                                           | ydcM | 1501681 | 0    |
| TU-0943 | FWD | 1503982 | 1504057 | 75 MU-565                 | 1503923 NT                                             |      |         |      |
| TU-0944 | FWD | 1504207 | 1506832 | 2625 MU-566               | 1504343 ydcN;ydcP                                      | ydcN | 1504196 | -147 |
| TU-0945 | FWD | 1507307 | 1507957 | 650 MU-567                | 1507299 yncN;ydcQ                                      | yncN | 1507310 | 11   |
| TU-0946 | FWD | 1508007 | 1509213 | 1206 MU-568               | 1508002 ydcR                                           | ydcR | 1508027 | 25   |
| TU-0947 | FWD | 1509543 | 1515050 | 5507 MU-569;MU-570        | 1509620 ydcS;ydcT;ydcU;ydcV;ydcW                       | ydcS | 1509678 | 58   |
| TU-0948 | FWD | 1509543 | 1515050 | 5507 MU-569;MU-570        | 1509628 ydcS;ydcT;ydcU;ydcV;ydcW                       | ydcS | 1509678 | 50   |
| TU-0949 | FWD | 1512525 | 1515050 | 2525 MU-570               | 1512672 ydcV;ydcW                                      | ydcV | 1512786 | 114  |
| TU-0950 | FWD | 1515400 | 1515575 | 175 MU-571                | 1515286 ydcX                                           | ydcX | 1515413 | 127  |
| TU-0951 | FWD | 1515400 | 1515575 | 175 MU-571                | 1515384 ydcX                                           | ydcX | 1515413 | 29   |
| TU-0952 | FWD | 1515600 | 1516350 | 750 MU-572                | 1515636 ydcY                                           | ydcY | 1515672 | 36   |

|         |     |         |         |                    |                              |       |         |     |
|---------|-----|---------|---------|--------------------|------------------------------|-------|---------|-----|
| TU-0953 | FWD | 1517050 | 1518875 | 1825 MU-573;MU-574 | 1517023 yncB;yncC            | yncB  | 1517027 | 4   |
| TU-0954 | FWD | 1518275 | 1518875 | 600 MU-574         | 1518295 yncC                 | yncC  | 1518286 | -9  |
| TU-0955 | FWD | 1518275 | 1518875 | 600 MU-574         | 1518318 yncC                 | yncC  | 1518286 | -32 |
| TU-0956 | FWD | 1521275 | 1522450 | 1175 MU-575        | 1521251 yncE                 | yncE  | 1521331 | 80  |
| TU-0957 | FWD | 1521275 | 1522450 | 1175 MU-575        | 1521288 yncE                 | yncE  | 1521331 | 43  |
| TU-0958 | FWD | 1524225 | 1524750 | 525 MU-576         | 1524249 yncG                 | yncG  | 1524271 | 22  |
| TU-0959 | FWD | 1524964 | 1525176 | 212 MU-577         | yncH                         | yncH  | 1524964 |     |
| TU-0960 | FWD | 1526225 | 1526875 | 650 MU-578         | rhsE                         | rhsE  | 1525926 |     |
| TU-0961 | FWD | 1528256 | 1528431 | 175 MU-579         | ydcD                         | ydcD  | 1527946 |     |
| TU-0962 | FWD | 1528610 | 1530976 | 2366 MU-580        | 1528575 yncI;ydcC            | yncI  | 1528610 | 35  |
| TU-0963 | FWD | 1530906 | 1531381 | 475 MU-581         | 1531009 pptA                 | pptA  | 1531076 | 67  |
| TU-0964 | FWD | 1530906 | 1531381 | 475 MU-581         | 1531017 pptA                 | pptA  | 1531076 | 59  |
| TU-0965 | FWD | 1530906 | 1531381 | 475 MU-581         | 1531054 pptA                 | pptA  | 1531076 | 22  |
| TU-0966 | FWD | 1532056 | 1532881 | 825 MU-582         | 1532024 nhoA                 | nhoA  | 1532048 | 24  |
| TU-0967 | FWD | 1545417 | 1548217 | 2800 MU-583        | 1545331 fdnG;fdnH;fdnI;C0362 | fdnG  | 1545425 | 94  |
| TU-0968 | FWD | 1550025 | 1550410 | 385 MU-584         | C0362                        | C0362 | 1550025 |     |
| TU-0969 | FWD | 1554542 | 1555192 | 650 MU-585         | 1554623 osmC                 | osmC  | 1554649 | 26  |
| TU-0970 | FWD | 1554542 | 1555192 | 650 MU-585         | 1554633 osmC                 | osmC  | 1554649 | 16  |
| TU-0971 | FWD | 1590462 | 1590637 | 175 MU-586         | 1590454 NT                   |       |         |     |
| TU-0972 | FWD | 1590462 | 1590637 | 175 MU-586         | 1590496 NT                   |       |         |     |
| TU-0973 | FWD | 1601212 | 1603887 | 2675 MU-587        | IsrA;IsrC;IsrD;IsrB          | IsrA  | 1599514 |     |
| TU-0974 | FWD | 1604162 | 1605262 | 1100 MU-588        | 1604091 IsrF;IsrG            | IsrF  | 1604124 | 33  |
| TU-0975 | FWD | 1605362 | 1606412 | 1050 MU-589        | 1605347 tam                  | tam   | 1605370 | 23  |
| TU-0976 | FWD | 1609962 | 1610212 | 250 MU-590         | NT                           |       |         |     |
| TU-0977 | FWD | 1612687 | 1613462 | 775 MU-591         | 1612804 yneJ                 | yneJ  | 1612828 | 24  |
| TU-0978 | FWD | 1613787 | 1614902 | 1115 MU-592        | yncK                         | yncK  | 1613787 |     |
| TU-0979 | FWD | 1615037 | 1616212 | 1175 MU-593        | 1615019 ydeA                 | ydeA  | 1615052 | 33  |
| TU-0980 | FWD | 1615037 | 1616212 | 1175 MU-593        | 1615025 ydeA                 | ydeA  | 1615052 | 27  |
| TU-0981 | FWD | 1617162 | 1618212 | 1050 MU-594        | 1617117 marR;marA;marB       | marR  | 1617144 | 27  |
| TU-0982 | FWD | 1619362 | 1620487 | 1125 MU-595        | 1619451 ydeE                 | ydeE  | 1619356 | -95 |
| TU-0983 | FWD | 1620587 | 1620837 | 250 MU-596         | 1620611 yneM                 | yncM  | 1620670 | 59  |
| TU-0984 | FWD | 1620587 | 1620837 | 250 MU-596         | 1620623 yneM                 | yncM  | 1620670 | 47  |
| TU-0985 | FWD | 1620587 | 1620837 | 250 MU-596         | 1620630 yneM                 | yncM  | 1620670 | 40  |
| TU-0986 | FWD | 1622612 | 1623162 | 550 MU-597         | 1622714 ydeJ                 | ydeJ  | 1622797 | 83  |
| TU-0987 | FWD | 1622612 | 1623162 | 550 MU-597         | 1622754 ydeJ                 | ydeJ  | 1622797 | 43  |
| TU-0988 | FWD | 1622612 | 1623162 | 550 MU-597         | 1622768 ydeJ                 | ydeJ  | 1622797 | 29  |
| TU-0989 | FWD | 1625487 | 1626287 | 800 MU-598         | 1625515 ydfG                 | ydfG  | 1625541 | 26  |
| TU-0990 | FWD | 1625487 | 1626287 | 800 MU-598         | 1625525 ydfG                 | ydfG  | 1625541 | 16  |
| TU-0991 | FWD | 1626337 | 1627037 | 700 MU-599         | 1626350 ydfH                 | ydfH  | 1626376 | 26  |
| TU-0992 | FWD | 1627212 | 1627612 | 400 MU-600         | 1627192 ydfZ                 | ydfZ  | 1627239 | 47  |
| TU-0993 | FWD | 1629462 | 1629787 | 325 MU-601         | NT                           |       |         |     |
| TU-0994 | FWD | 1630762 | 1631187 | 425 MU-602         | 1630662 ydfK                 | ydfK  | 1631063 | 401 |
| TU-0995 | FWD | 1631646 | 1632236 | 590 MU-603         | pinQ                         | pinQ  | 1631646 |     |
| TU-0996 | FWD | 1634780 | 1635481 | 701 MU-604         | ynfO;ydfO                    | ynfO  | 1634780 |     |
| TU-0997 | FWD | 1639879 | 1640091 | 212 MU-605         | cspF                         | cspF  | 1639879 |     |
| TU-0998 | FWD | 1640137 | 1640362 | 225 MU-606         | 1640110 NT                   |       |         |     |

|         |     |         |         |                                  |                                  |      |         |      |
|---------|-----|---------|---------|----------------------------------|----------------------------------|------|---------|------|
| TU-0999 | FWD | 1644090 | 1644315 | 225 MU-607                       | 1644252 ydfV                     | ydfV | 1643921 | -331 |
| TU-1000 | FWD | 1644390 | 1644690 | 300 MU-608                       | 1644356 flxA                     | flxA | 1644429 | 73   |
| TU-1001 | FWD | 1644390 | 1644690 | 300 MU-608                       | 1644385 flxA                     | flxA | 1644429 | 44   |
| TU-1002 | FWD | 1644390 | 1644690 | 300 MU-608                       | 1644410 flxA                     | flxA | 1644429 | 19   |
| TU-1003 | FWD | 1645990 | 1646340 | 350 MU-609                       | 1645955 dicA                     | dicA | 1645958 | 3    |
| TU-1004 | FWD | 1645990 | 1646340 | 350 MU-609                       | 1645971 dicA                     | dicA | 1645958 | -13  |
| TU-1005 | FWD | 1646540 | 1646840 | 300 MU-610                       | 1646462 ydfA;ydfB;rzpQ           | ydfA | 1646532 | 70   |
| TU-1006 | FWD | 1647240 | 1647415 | 175 MU-611                       | 1647206 dicF                     | dicF | 1647406 | 200  |
| TU-1007 | FWD | 1647240 | 1647415 | 175 MU-611                       | 1647275 dicF                     | dicF | 1647406 | 131  |
| TU-1008 | FWD | 1647633 | 1648009 | 376 MU-612                       | dicB;ydfD                        | dicB | 1647633 |      |
| TU-1009 | FWD | 1648102 | 1648866 | 764 MU-613                       | ydfE                             | ydfE | 1648102 |      |
| TU-1010 | FWD | 1648890 | 1650165 | 1275 MU-614                      | insD                             | insD | 1648869 |      |
| TU-1011 | FWD | 1649575 | 1650732 | 1157 MU-615                      | intQ                             | intQ | 1649575 |      |
| TU-1012 | FWD | 1653745 | 1654770 | 1025 MU-616                      | 1653746 ynfB;speG                | ynfB | 1653832 | 86   |
| TU-1013 | FWD | 1653745 | 1654770 | 1025 MU-616                      | 1653808 ynfB;speG                | ynfB | 1653832 | 24   |
| TU-1014 | FWD | 1655595 | 1655945 | 350 MU-617                       | 1655563 ynfD                     | ynfD | 1655589 | 26   |
| TU-1015 | FWD | 1655595 | 1655945 | 350 MU-617                       | 1655569 ynfD                     | ynfD | 1655589 | 20   |
| TU-1016 | FWD | 1656095 | 1663220 | 7125 MU-618;MU-619;MU-620;MU-621 | 1656059 ynfE;ynfF;ynfG;ynfH;dmsD | ynfE | 1656093 | 34   |
| TU-1017 | FWD | 1656095 | 1663220 | 7125 MU-618;MU-619;MU-620;MU-621 | 1656061 ynfE;ynfF;ynfG;ynfH;dmsD | ynfE | 1656093 | 32   |
| TU-1018 | FWD | 1657495 | 1663220 | 5725 MU-619;MU-620;MU-621        | 1657572 ynfF;ynfG;ynfH;dmsD      | ynfF | 1658580 | 1008 |
| TU-1019 | FWD | 1657495 | 1663220 | 5725 MU-619;MU-620;MU-621        | 1657638 ynfF;ynfG;ynfH;dmsD      | ynfF | 1658580 | 942  |
| TU-1020 | FWD | 1659745 | 1663220 | 3475 MU-620;MU-621               | 1659685 ynfG;ynfH;dmsD           | ynfG | 1661014 | 1329 |
| TU-1021 | FWD | 1661620 | 1663220 | 1600 MU-621                      | 1661476 ynfH;dmsD                | ynfH | 1661633 | 157  |
| TU-1022 | FWD | 1661620 | 1663220 | 1600 MU-621                      | 1661746 ynfH;dmsD                | ynfH | 1661633 | -113 |
| TU-1023 | FWD | 1663320 | 1663970 | 650 MU-622                       | 1663316 clcB                     | clcB | 1663339 | 23   |
| TU-1024 | FWD | 1663320 | 1663970 | 650 MU-622                       | 1663319 clcB                     | clcB | 1663339 | 20   |
| TU-1025 | FWD | 1667720 | 1669045 | 1325 MU-623                      | 1667686 ynfM                     | ynfM | 1667723 | 37   |
| TU-1026 | FWD | 1667720 | 1669045 | 1325 MU-623                      | 1667781 ynfM                     | ynfM | 1667723 | -58  |
| TU-1027 | FWD | 1669370 | 1669670 | 300 MU-624                       | 1669351 asr                      | asr  | 1669400 | 49   |
| TU-1028 | FWD | 1669801 | 1669884 | 83 MU-625                        | ydgU                             | ydgU | 1669801 |      |
| TU-1029 | FWD | 1669970 | 1670970 | 1000 MU-626                      | 1669940 ydgD                     | ydgD | 1669984 | 44   |
| TU-1030 | FWD | 1671945 | 1672870 | 925 MU-627                       | 1671914 tqSA                     | tqSA | 1671937 | 23   |
| TU-1031 | FWD | 1676295 | 1678345 | 2050 MU-628                      | 1676332 ydgH;ydGI                | ydgH | 1676451 | 119  |
| TU-1032 | FWD | 1676295 | 1678345 | 2050 MU-628                      | 1676394 ydgH;ydGI                | ydgH | 1676451 | 57   |
| TU-1033 | FWD | 1676295 | 1678345 | 2050 MU-628                      | 1676402 ydgH;ydGI                | ydgH | 1676451 | 49   |
| TU-1034 | FWD | 1678795 | 1679795 | 1000 MU-629                      | 1678643 folM                     | folM | 1679000 | 357  |
| TU-1035 | FWD | 1678795 | 1679795 | 1000 MU-629                      | 1678869 folM                     | folM | 1679000 | 131  |
| TU-1036 | FWD | 1680195 | 1682220 | 2025 MU-630                      | 1680159 rstA;rstB                | rstA | 1680183 | 24   |
| TU-1037 | FWD | 1680195 | 1682220 | 2025 MU-630                      | 1680160 rstA;rstB                | rstA | 1680183 | 23   |
| TU-1038 | FWD | 1682270 | 1683445 | 1175 MU-631                      | 1682257 tus                      | tus  | 1682283 | 26   |
| TU-1039 | FWD | 1686595 | 1687720 | 1125 MU-632                      | 1686569 manA                     | manA | 1686600 | 31   |
| TU-1040 | FWD | 1686595 | 1687720 | 1125 MU-632                      | 1686575 manA                     | manA | 1686600 | 25   |
| TU-1041 | FWD | 1687845 | 1689545 | 1700 MU-633                      | 1687818 ydgA                     | ydgA | 1687876 | 58   |
| TU-1042 | FWD | 1697346 | 1700121 | 2775 MU-634;MU-635               | 1697338 malX;malY                | malX | 1697379 | 41   |
| TU-1043 | FWD | 1697346 | 1700121 | 2775 MU-634;MU-635               | 1697348 malX;malY                | malX | 1697379 | 31   |
| TU-1044 | FWD | 1698921 | 1700121 | 1200 MU-635                      | 1698864 malY                     | malY | 1698981 | 117  |

|         |     |         |         |                    |                                                          |      |         |     |
|---------|-----|---------|---------|--------------------|----------------------------------------------------------|------|---------|-----|
| TU-1045 | FWD | 1700246 | 1701121 | 875 MU-636         | 1700228 add                                              | add  | 1700257 | 29  |
| TU-1046 | FWD | 1702171 | 1702196 | 25 MU-637          | 1702086 NT                                               |      |         |     |
| TU-1047 | FWD | 1702571 | 1702921 | 350 MU-638         | 1702412 blr                                              | blr  | 1702575 | 163 |
| TU-1048 | FWD | 1702571 | 1702921 | 350 MU-638         | 1702536 blr                                              | blr  | 1702575 | 39  |
| TU-1049 | FWD | 1702971 | 1703046 | 75 MU-639          | 1702879 cnu                                              | cnu  | 1702973 | 94  |
| TU-1050 | FWD | 1703096 | 1710096 | 7000 MU-640;MU-641 | 1703230 ydgK;rsxA;rsxB;rsxC;rsxD;rsxE;rsxF;rsyG;rsyE;nth | ydgK | 1703274 | 44  |
| TU-1051 | FWD | 1703746 | 1710096 | 6350 MU-641        | rsxA;rsxB;rsxC;rsxD;rsxE;rsxF;rsyG;rsyE;nth              | rsxA | 1703791 |     |
| TU-1052 | FWD | 1710796 | 1712296 | 1500 MU-642        | 1710713 tppB                                             | tppB | 1710793 | 80  |
| TU-1053 | FWD | 1712396 | 1713246 | 850 MU-643         | 1712376 gst                                              | gst  | 1712401 | 25  |
| TU-1054 | FWD | 1717796 | 1718721 | 925 MU-644         | 1717775 slyB                                             | slyB | 1717900 | 125 |
| TU-1055 | FWD | 1717796 | 1718721 | 925 MU-644         | 1717783 slyB                                             | slyB | 1717900 | 117 |
| TU-1056 | FWD | 1717796 | 1718721 | 925 MU-644         | 1717794 slyB                                             | slyB | 1717900 | 106 |
| TU-1057 | FWD | 1717796 | 1718721 | 925 MU-644         | 1717801 slyB                                             | slyB | 1717900 | 99  |
| TU-1058 | FWD | 1717796 | 1718721 | 925 MU-644         | 1717842 slyB                                             | slyB | 1717900 | 58  |
| TU-1059 | FWD | 1717796 | 1718721 | 925 MU-644         | 1717855 slyB                                             | slyB | 1717900 | 45  |
| TU-1060 | FWD | 1717796 | 1718721 | 925 MU-644         | 1717893 slyB                                             | slyB | 1717900 | 7   |
| TU-1061 | FWD | 1718796 | 1722046 | 3250 MU-645        | 1718960 ydhI;ydhJ;ydhK                                   | ydhI | 1719049 | 89  |
| TU-1062 | FWD | 1718796 | 1722046 | 3250 MU-645        | 1719022 ydhI;ydhJ;ydhK                                   | ydhI | 1719049 | 27  |
| TU-1063 | FWD | 1724071 | 1725771 | 1700 MU-646        | 1724047 ydhM;nemA                                        | ydhM | 1724047 | 0   |
| TU-1064 | FWD | 1724071 | 1725771 | 1700 MU-646        | 1724064 ydhM;nemA                                        | ydhM | 1724047 | -17 |
| TU-1065 | FWD | 1725846 | 1726265 | 419 MU-647         | 1725785 gloA                                             | gloA | 1725861 | 76  |
| TU-1066 | FWD | 1725846 | 1726265 | 419 MU-647         | 1725824 gloA                                             | gloA | 1725861 | 37  |
| TU-1067 | FWD | 1725846 | 1726265 | 419 MU-647         | 1725833 gloA                                             | gloA | 1725861 | 28  |
| TU-1068 | FWD | 1726365 | 1731490 | 5125 MU-648        | 1726343 rnt;lhr                                          | rnt  | 1726371 | 28  |
| TU-1069 | FWD | 1732440 | 1733215 | 775 MU-649         | 1732405 ydhO                                             | ydhO | 1732459 | 54  |
| TU-1070 | FWD | 1733365 | 1734090 | 725 MU-650         | 1733349 sodB                                             | sodB | 1733402 | 53  |
| TU-1071 | FWD | 1733365 | 1734090 | 725 MU-650         | 1733362 sodB                                             | sodB | 1733402 | 40  |
| TU-1072 | FWD | 1733365 | 1734090 | 725 MU-650         | 1733380 sodB                                             | sodB | 1733402 | 22  |
| TU-1073 | FWD | 1735740 | 1736990 | 1250 MU-651        | 1735712 purR                                             | purR | 1735868 | 156 |
| TU-1074 | FWD | 1735740 | 1736990 | 1250 MU-651        | 1735720 purR                                             | purR | 1735868 | 148 |
| TU-1075 | FWD | 1737990 | 1738890 | 900 MU-652         | 1737904 ydhC                                             | ydhC | 1737935 | 31  |
| TU-1076 | FWD | 1739240 | 1740565 | 1325 MU-653        | 1739225 cfa                                              | cfa  | 1739437 | 212 |
| TU-1077 | FWD | 1739240 | 1740565 | 1325 MU-653        | 1739338 cfa                                              | cfa  | 1739437 | 99  |
| TU-1078 | FWD | 1739240 | 1740565 | 1325 MU-653        | 1739404 cfa                                              | cfa  | 1739437 | 33  |
| TU-1079 | FWD | 1741415 | 1742840 | 1425 MU-654        | 1741414 mdtK                                             | mdtK | 1741481 | 67  |
| TU-1080 | FWD | 1744465 | 1744665 | 200 MU-655         | 1744459 valV;valW                                        | valV | 1744459 | 0   |
| TU-1081 | FWD | 1744715 | 1744990 | 275 MU-656         | 1744697 ydhR                                             | ydhR | 1744724 | 27  |
| TU-1082 | FWD | 1745165 | 1746840 | 1675 MU-657        | 1745115 ydhS                                             | ydhS | 1745155 | 40  |
| TU-1083 | FWD | 1753390 | 1755140 | 1750 MU-658        | 1753583 pykF                                             | pykF | 1753722 | 139 |
| TU-1084 | FWD | 1753390 | 1755140 | 1750 MU-658        | 1753624 pykF                                             | pykF | 1753722 | 98  |
| TU-1085 | FWD | 1753390 | 1755140 | 1750 MU-658        | 1753637 pykF                                             | pykF | 1753722 | 85  |
| TU-1086 | FWD | 1753390 | 1755140 | 1750 MU-658        | 1753651 pykF                                             | pykF | 1753722 | 71  |
| TU-1087 | FWD | 1753390 | 1755140 | 1750 MU-658        | 1753685 pykF                                             | pykF | 1753722 | 37  |
| TU-1088 | FWD | 1753390 | 1755140 | 1750 MU-658        | 1753695 pykF                                             | pykF | 1753722 | 27  |
| TU-1089 | FWD | 1753390 | 1755140 | 1750 MU-658        | 1753703 pykF                                             | pykF | 1753722 | 19  |
| TU-1090 | FWD | 1755415 | 1755865 | 450 MU-659         | 1755407 lpp                                              | lpp  | 1755445 | 38  |



|         |     |         |         |                    |                                                 |      |         |     |
|---------|-----|---------|---------|--------------------|-------------------------------------------------|------|---------|-----|
| TU-1091 | FWD | 1755415 | 1755865 | 450 MU-659         | 1755419 lpp                                     | lpp  | 1755445 | 26  |
| TU-1092 | FWD | 1766895 | 1768145 | 1250 MU-660        | 1766794 ydiK                                    | ydiK | 1767098 | 304 |
| TU-1093 | FWD | 1768396 | 1768501 | 105 MU-661         | 1768396 rprA                                    | rprA | 1768396 | 0   |
| TU-1094 | FWD | 1768645 | 1768845 | 200 MU-662         | ydiL                                            | ydiL | 1768639 |     |
| TU-1095 | FWD | 1769095 | 1770309 | 1214 MU-663        | ydiM                                            | ydiM | 1769095 |     |
| TU-1096 | FWD | 1770530 | 1772679 | 2149 MU-664        | ydiN;ydiB                                       | ydiN | 1770530 |     |
| TU-1097 | FWD | 1772620 | 1773445 | 825 MU-665         | 1772646 aroD                                    | aroD | 1772710 | 64  |
| TU-1098 | FWD | 1774045 | 1774945 | 900 MU-666         | ydiF;ydiO                                       | ydiF | 1773611 |     |
| TU-1099 | FWD | 1777641 | 1780998 | 3357 MU-667        | ydiQ;ydiR;ydiS;ydiT                             | ydiQ | 1777641 |     |
| TU-1100 | FWD | 1781055 | 1782701 | 1646 MU-668        | fadK                                            | fadK | 1781055 |     |
| TU-1101 | FWD | 1785472 | 1786322 | 850 MU-669         | 1785439 ydiA                                    | ydiA | 1785469 | 30  |
| TU-1102 | FWD | 1786372 | 1787472 | 1100 MU-670        | 1786345 aroH                                    | aroH | 1786459 | 114 |
| TU-1103 | FWD | 1786372 | 1787472 | 1100 MU-670        | 1786408 aroH                                    | aroH | 1786459 | 51  |
| TU-1104 | FWD | 1786372 | 1787472 | 1100 MU-670        | 1786444 aroH                                    | aroH | 1786459 | 15  |
| TU-1105 | FWD | 1787647 | 1787772 | 125 MU-671         | 1787609 ydiE                                    | ydiE | 1787637 | 28  |
| TU-1106 | FWD | 1797297 | 1798022 | 725 MU-672         | 1797314 NT                                      |      |         |     |
| TU-1107 | FWD | 1801118 | 1803017 | 1899 MU-673        | arpB                                            | arpB | 1801118 |     |
| TU-1108 | FWD | 1803222 | 1803297 | 75 MU-674          | 1803158 yniD                                    | yniD | 1803189 | 31  |
| TU-1109 | FWD | 1804347 | 1805322 | 975 MU-675         | 1804346 pfkB                                    | pfkB | 1804394 | 48  |
| TU-1110 | FWD | 1804347 | 1805322 | 975 MU-675         | 1804376 pfkB                                    | pfkB | 1804394 | 18  |
| TU-1111 | FWD | 1805372 | 1806722 | 1350 MU-676;MU-677 | 1805399 ydiZ;yniA                               | ydiZ | 1805424 | 25  |
| TU-1112 | FWD | 1805797 | 1806722 | 925 MU-677         | 1805794 yniA                                    | yniA | 1805820 | 26  |
| TU-1113 | FWD | 1807347 | 1808047 | 700 MU-678         | 1807303 yniC                                    | yniC | 1807404 | 101 |
| TU-1114 | FWD | 1807347 | 1808047 | 700 MU-678         | 1807313 yniC                                    | yniC | 1807404 | 91  |
| TU-1115 | FWD | 1807347 | 1808047 | 700 MU-678         | 1807348 yniC                                    | yniC | 1807404 | 56  |
| TU-1116 | FWD | 1808247 | 1808597 | 350 MU-679         | ydjM                                            | ydjM | 1808223 |     |
| TU-1117 | FWD | 1808947 | 1810672 | 1725 MU-680        | 1808906 ydjN                                    | ydjN | 1808958 | 52  |
| TU-1118 | FWD | 1808947 | 1810672 | 1725 MU-680        | 1808938 ydjN                                    | ydjN | 1808958 | 20  |
| TU-1119 | FWD | 1808947 | 1810672 | 1725 MU-680        | 1808943 ydjN                                    | ydjN | 1808958 | 15  |
| TU-1120 | FWD | 1811854 | 1814229 | 2375 MU-681        | 1811839 katE                                    | katE | 1811891 | 52  |
| TU-1121 | FWD | 1820460 | 1821335 | 875 MU-682         | 1820452 nadE                                    | nadE | 1820482 | 30  |
| TU-1122 | FWD | 1820460 | 1821335 | 875 MU-682         | 1820460 nadE                                    | nadE | 1820482 | 22  |
| TU-1123 | FWD | 1821435 | 1822310 | 875 MU-683         | 1821516 cho                                     | cho  | 1821539 | 23  |
| TU-1124 | FWD | 1830435 | 1831235 | 800 MU-684         | 1830423 xthA                                    | xthA | 1830452 | 29  |
| TU-1125 | FWD | 1831385 | 1833210 | 1825 MU-685;MU-686 | 1831520 ydjX;ydjY;ydjZ;ynjA;ynjB;ynjC;ynjD;ynjE | ydjX | 1831425 | -95 |
| TU-1126 | FWD | 1831985 | 1838735 | 6750 MU-686;MU-687 | 1832010 ydjY;ydjZ;ynjA;ynjB;ynjC;ynjD;ynjE      | ydjY | 1832140 | 130 |
| TU-1127 | FWD | 1833360 | 1838735 | 5375 MU-687        | 1833171 ynjA;ynjB;ynjC;ynjD;ynjE                | ynjA | 1833539 | 368 |
| TU-1128 | FWD | 1833360 | 1838735 | 5375 MU-687        | 1833341 ynjA;ynjB;ynjC;ynjD;ynjE                | ynjA | 1833539 | 198 |
| TU-1129 | FWD | 1833360 | 1838735 | 5375 MU-687        | 1833483 ynjA;ynjB;ynjC;ynjD;ynjE                | ynjA | 1833539 | 56  |
| TU-1130 | FWD | 1839510 | 1839860 | 350 MU-688         | 1839484 nudG                                    | nudG | 1839514 | 30  |
| TU-1131 | FWD | 1840360 | 1841885 | 1525 MU-689        | 1840289 gdhA                                    | gdhA | 1840395 | 106 |
| TU-1132 | FWD | 1840360 | 1841885 | 1525 MU-689        | 1840332 gdhA                                    | gdhA | 1840395 | 63  |
| TU-1133 | FWD | 1840360 | 1841885 | 1525 MU-689        | 1840340 gdhA                                    | gdhA | 1840395 | 55  |
| TU-1134 | FWD | 1840360 | 1841885 | 1525 MU-689        | 1840347 gdhA                                    | gdhA | 1840395 | 48  |
| TU-1135 | FWD | 1840360 | 1841885 | 1525 MU-689        | 1840356 gdhA                                    | gdhA | 1840395 | 39  |
| TU-1136 | FWD | 1840360 | 1841885 | 1525 MU-689        | 1840362 gdhA                                    | gdhA | 1840395 | 33  |

|         |     |         |         |                    |         |                |      |         |     |
|---------|-----|---------|---------|--------------------|---------|----------------|------|---------|-----|
| TU-1137 | FWD | 1840360 | 1841885 | 1525 MU-689        | 1840370 | gdhA           | gdhA | 1840395 | 25  |
| TU-1138 | FWD | 1840360 | 1841885 | 1525 MU-689        | 1840385 | gdhA           | gdhA | 1840395 | 10  |
| TU-1139 | FWD | 1846835 | 1848660 | 1825 MU-690        | 1846816 | sppA           | sppA | 1846861 | 45  |
| TU-1140 | FWD | 1848885 | 1850535 | 1650 MU-691        | 1848858 | ansA;pncA      | ansA | 1848884 | 26  |
| TU-1141 | FWD | 1850810 | 1850885 | 75 MU-692          |         | NT             |      |         |     |
| TU-1142 | FWD | 1860560 | 1861810 | 1250 MU-693        | 1860550 | gapA           | gapA | 1860795 | 245 |
| TU-1143 | FWD | 1860560 | 1861810 | 1250 MU-693        | 1860641 | gapA           | gapA | 1860795 | 154 |
| TU-1144 | FWD | 1860560 | 1861810 | 1250 MU-693        | 1860750 | gapA           | gapA | 1860795 | 45  |
| TU-1145 | FWD | 1860560 | 1861810 | 1250 MU-693        | 1860759 | gapA           | gapA | 1860795 | 36  |
| TU-1146 | FWD | 1860560 | 1861810 | 1250 MU-693        | 1860764 | gapA           | gapA | 1860795 | 31  |
| TU-1147 | FWD | 1860560 | 1861810 | 1250 MU-693        | 1860768 | gapA           | gapA | 1860795 | 27  |
| TU-1148 | FWD | 1860560 | 1861810 | 1250 MU-693        | 1860775 | gapA           | gapA | 1860795 | 20  |
| TU-1149 | FWD | 1861860 | 1862710 | 850 MU-694         | 1861848 | yeaD           | yeaD | 1861874 | 26  |
| TU-1150 | FWD | 1864793 | 1868243 | 3450 MU-695        | 1864771 | yeaG;yeaH      | yeaG | 1864932 | 161 |
| TU-1151 | FWD | 1868409 | 1869884 | 1475 MU-696        |         | yeaI           | yeaI | 1868409 |     |
| TU-1152 | FWD | 1869318 | 1869793 | 475 MU-697         | 1869267 | NT             |      |         |     |
| TU-1153 | FWD | 1870018 | 1871418 | 1400 MU-698        | 1870070 | yeaJ           | yeaJ | 1870065 | -5  |
| TU-1154 | FWD | 1871568 | 1872093 | 525 MU-699         | 1871568 | yeaK           | yeaK | 1871598 | 30  |
| TU-1155 | FWD | 1872143 | 1872693 | 550 MU-700         | 1872376 | yeaL           | yeaL | 1872376 | 0   |
| TU-1156 | FWD | 1873697 | 1874878 | 1181 MU-701        | 1873676 | yeaN           | yeaN | 1873697 | 21  |
| TU-1157 | FWD | 1874868 | 1875268 | 400 MU-702         | 1874890 | yeaO           | yeaO | 1874933 | 43  |
| TU-1158 | FWD | 1874868 | 1875268 | 400 MU-702         | 1874905 | yeaO           | yeaO | 1874933 | 28  |
| TU-1159 | FWD | 1875718 | 1876893 | 1175 MU-703        | 1875691 | yeaP           | yeaP | 1875739 | 48  |
| TU-1160 | FWD | 1880143 | 1880693 | 550 MU-704         | 1879856 | yeaU           | yeaU | 1879936 | 80  |
| TU-1161 | FWD | 1881212 | 1884834 | 3622 MU-705        | 1881168 | yeaV;yeaW;yeaX | yeaV | 1881212 | 44  |
| TU-1162 | FWD | 1891343 | 1891743 | 400 MU-706         | 1891360 | yoaB           | yoaB | 1891391 | 31  |
| TU-1163 | FWD | 1891343 | 1891743 | 400 MU-706         | 1891366 | yoaB           | yoaB | 1891391 | 25  |
| TU-1164 | FWD | 1891343 | 1891743 | 400 MU-706         | 1891374 | yoaB           | yoaB | 1891391 | 17  |
| TU-1165 | FWD | 1891918 | 1892468 | 550 MU-707         | 1892041 | yoaC           | yoaC | 1892097 | 56  |
| TU-1166 | FWD | 1892793 | 1894770 | 1977 MU-708        | 1892781 | pabB;nudL      | pabB | 1892829 | 48  |
| TU-1167 | FWD | 1894820 | 1896370 | 1550 MU-709        | 1894833 | sdaA           | sdaA | 1894956 | 123 |
| TU-1168 | FWD | 1896445 | 1898070 | 1625 MU-710        |         | yoaD           | yoaD | 1896451 |     |
| TU-1169 | FWD | 1899920 | 1902770 | 2850 MU-711;MU-712 | 1899959 | manX;manY;manZ | manX | 1900072 | 113 |
| TU-1170 | FWD | 1899920 | 1902770 | 2850 MU-711;MU-712 | 1900054 | manX;manY;manZ | manX | 1900072 | 18  |
| TU-1171 | FWD | 1901170 | 1902770 | 1600 MU-712        | 1901068 | manY;manZ      | manY | 1901106 | 38  |
| TU-1172 | FWD | 1901170 | 1902770 | 1600 MU-712        | 1901076 | manY;manZ      | manY | 1901106 | 30  |
| TU-1173 | FWD | 1902820 | 1903195 | 375 MU-713         | 1902743 | yobD           | yobD | 1902825 | 82  |
| TU-1174 | FWD | 1903595 | 1903995 | 400 MU-714         | 1903486 | yebN           | yebN | 1903712 | 226 |
| TU-1175 | FWD | 1906195 | 1906520 | 325 MU-715         | 1906179 | NT             |      |         |     |
| TU-1176 | FWD | 1906945 | 1907170 | 225 MU-716         | 1906925 | yobH           | yobH | 1906949 | 24  |
| TU-1177 | FWD | 1908300 | 1909673 | 1373 MU-717        |         | yebQ           | yebQ | 1908300 |     |
| TU-1178 | FWD | 1914270 | 1918070 | 3800 MU-718;MU-719 | 1914178 | yebS;yebT      | yebS | 1914282 | 104 |
| TU-1179 | FWD | 1914270 | 1918070 | 3800 MU-718;MU-719 | 1914258 | yebS;yebT      | yebS | 1914282 | 24  |
| TU-1180 | FWD | 1915295 | 1918070 | 2775 MU-719        | 1915436 | yebT           | yebT | 1915534 | 98  |
| TU-1181 | FWD | 1918245 | 1919670 | 1425 MU-720        | 1918223 | rsmF           | rsmF | 1918247 | 24  |
| TU-1182 | FWD | 1919770 | 1920045 | 275 MU-721         | 1919749 | yebV           | yebV | 1919804 | 55  |

|         |     |         |         |             |                                            |       |         |      |
|---------|-----|---------|---------|-------------|--------------------------------------------|-------|---------|------|
| TU-1183 | FWD | 1920096 | 1920471 | 375 MU-722  | 1920121 yebW                               | yebW  | 1920145 | 24   |
| TU-1184 | FWD | 1921071 | 1921321 | 250 MU-723  | 1921090 ryeA                               | ryeA  | 1921090 | 0    |
| TU-1185 | FWD | 1923046 | 1923421 | 375 MU-724  | 1923112 holE                               | holE  | 1923132 | 20   |
| TU-1186 | FWD | 1923446 | 1924246 | 800 MU-725  | 1923413 yobB                               | yobB  | 1923464 | 51   |
| TU-1187 | FWD | 1924271 | 1924771 | 500 MU-726  | 1924122 exoX                               | exoX  | 1924144 | 22   |
| TU-1188 | FWD | 1928921 | 1930096 | 1175 MU-727 | 1928881 purT                               | purT  | 1928905 | 24   |
| TU-1189 | FWD | 1934424 | 1935599 | 1175 MU-728 | 1934613 yebK                               | yebK  | 1934676 | 63   |
| TU-1190 | FWD | 1935624 | 1937199 | 1575 MU-729 | 1935526 pykA                               | pykA  | 1935673 | 147  |
| TU-1191 | FWD | 1935624 | 1937199 | 1575 MU-729 | 1935566 pykA                               | pykA  | 1935673 | 107  |
| TU-1192 | FWD | 1935624 | 1937199 | 1575 MU-729 | 1935571 pykA                               | pykA  | 1935673 | 102  |
| TU-1193 | FWD | 1940649 | 1942374 | 1725 MU-730 | 1940581 znuC;znuB                          | znuC  | 1940686 | 105  |
| TU-1194 | FWD | 1940649 | 1942374 | 1725 MU-730 | 1940614 znuC;znuB                          | znuC  | 1940686 | 72   |
| TU-1195 | FWD | 1940649 | 1942374 | 1725 MU-730 | 1940625 znuC;znuB                          | znuC  | 1940686 | 61   |
| TU-1196 | FWD | 1940649 | 1942374 | 1725 MU-730 | 1940658 znuC;znuB                          | znuC  | 1940686 | 28   |
| TU-1197 | FWD | 1944275 | 1944877 | 602 MU-731  | 1944248 yebB                               | yebB  | 1944275 | 27   |
| TU-1198 | FWD | 1948824 | 1950124 | 1300 MU-732 | 1948632 yecD;yecE                          | yecD  | 1948856 | 224  |
| TU-1199 | FWD | 1948824 | 1950124 | 1300 MU-732 | 1948794 yecD;yecE                          | yecD  | 1948856 | 62   |
| TU-1200 | FWD | 1950274 | 1952474 | 2200 MU-733 | 1950455 yecN;cmoA;cmoB                     | yecN  | 1950290 | -165 |
| TU-1201 | FWD | 1953649 | 1953874 | 225 MU-734  | 1953581 NT                                 |       |         |      |
| TU-1202 | FWD | 1958049 | 1959799 | 1750 MU-735 | 1958029 argS                               | argS  | 1958086 | 57   |
| TU-1203 | FWD | 1959996 | 1960484 | 488 MU-736  | yecT                                       | yecT  | 1959996 |      |
| TU-1204 | FWD | 1970763 | 1970840 | 77 MU-737   | C0465                                      | C0465 | 1970763 |      |
| TU-1205 | FWD | 1977349 | 1977424 | 75 MU-738   | 1977320 NT                                 |       |         |      |
| TU-1206 | FWD | 1977699 | 1978299 | 600 MU-739  | 1977744 uspC                               | uspC  | 1977777 | 33   |
| TU-1207 | FWD | 1980599 | 1980799 | 200 MU-740  | 1980567 NT                                 |       |         |      |
| TU-1208 | FWD | 1984802 | 1985427 | 625 MU-741  | 1984821 ftnB                               | ftnB  | 1984949 | 128  |
| TU-1209 | FWD | 1986246 | 1986569 | 323 MU-742  | yecR                                       | yecR  | 1986246 |      |
| TU-1210 | FWD | 1986727 | 1987227 | 500 MU-743  | 1986706 ftnA                               | ftnA  | 1986740 | 34   |
| TU-1211 | FWD | 1986727 | 1987227 | 500 MU-743  | 1986724 ftnA                               | ftnA  | 1986740 | 16   |
| TU-1212 | FWD | 1987702 | 1988902 | 1200 MU-744 | 1987667 tyrP                               | tyrP  | 1987705 | 38   |
| TU-1213 | FWD | 1993830 | 1994030 | 200 MU-745  | 1993798 yecF                               | yecF  | 1993842 | 44   |
| TU-1214 | FWD | 1993830 | 1994030 | 200 MU-745  | 1993814 yecF                               | yecF  | 1993842 | 28   |
| TU-1215 | FWD | 1994905 | 1995130 | 225 MU-746  | 1994856 NT                                 |       |         |      |
| TU-1216 | FWD | 1998530 | 1998730 | 200 MU-747  | 1998511 NT                                 |       |         |      |
| TU-1217 | FWD | 2001896 | 2004102 | 2206 MU-748 | 2001860 fliD;fliS;fliT                     | fliD  | 2001896 | 36   |
| TU-1218 | FWD | 2001896 | 2004102 | 2206 MU-748 | 2001866 fliD;fliS;fliT                     | fliD  | 2001896 | 30   |
| TU-1219 | FWD | 2004173 | 2005673 | 1500 MU-749 | 2004156 amyA                               | amyA  | 2004180 | 24   |
| TU-1220 | FWD | 2006298 | 2007723 | 1425 MU-750 | 2006264 yedE;yedF                          | yedE  | 2006301 | 37   |
| TU-1221 | FWD | 2007823 | 2008523 | 700 MU-751  | 2007826 yedK                               | yedK  | 2007845 | 19   |
| TU-1222 | FWD | 2007823 | 2008523 | 700 MU-751  | 2007831 yedK                               | yedK  | 2007845 | 14   |
| TU-1223 | FWD | 2008623 | 2009223 | 600 MU-752  | 2008610 yedL                               | yedL  | 2008624 | 14   |
| TU-1224 | FWD | 2008623 | 2009223 | 600 MU-752  | 2008621 yedL                               | yedL  | 2008624 | 3    |
| TU-1225 | FWD | 2010526 | 2010687 | 161 MU-753  | intG                                       | intG  | 2010526 |      |
| TU-1226 | FWD | 2011723 | 2016823 | 5100 MU-754 | 2011167 fliF;fliG;fliH;fliI;fliJ;fliK      | fliF  | 2011253 | 86   |
| TU-1227 | FWD | 2017748 | 2018998 | 1250 MU-755 | 2017609 fliL;fliM;fliN;fliO;fliP;fliQ;fliR | fliL  | 2017642 | 33   |
| TU-1228 | FWD | 2019112 | 2021702 | 2590 MU-756 | 2018934 fliN;fliO;fliP;fliQ;fliR           | fliN  | 2019112 | 178  |

|         |     |         |         |                           |                                                      |      |         |      |
|---------|-----|---------|---------|---------------------------|------------------------------------------------------|------|---------|------|
| TU-1229 | FWD | 2021992 | 2022615 | 623 MU-757                | 2021861 rcsA                                         | rcsA | 2021992 | 131  |
| TU-1230 | FWD | 2022977 | 2023252 | 275 MU-758                | 2022951 yodD                                         | yodD | 2023010 | 59   |
| TU-1231 | FWD | 2023302 | 2024427 | 1125 MU-759               | 2023477 yedP                                         | yedP | 2023535 | 58   |
| TU-1232 | FWD | 2027563 | 2028483 | 920 MU-760                | yedA                                                 | yedA | 2027563 |      |
| TU-1233 | FWD | 2031673 | 2031763 | 90 MU-761                 | rseX                                                 | rseX | 2031673 |      |
| TU-1234 | FWD | 2032027 | 2033202 | 1175 MU-762               | 2032159 yedS                                         | yedS | 2032075 | -84  |
| TU-1235 | FWD | 2033677 | 2034727 | 1050 MU-763               | 2033655 hchA                                         | hchA | 2033859 | 204  |
| TU-1236 | FWD | 2033677 | 2034727 | 1050 MU-763               | 2033776 hchA                                         | hchA | 2033859 | 83   |
| TU-1237 | FWD | 2033677 | 2034727 | 1050 MU-763               | 2033785 hchA                                         | hchA | 2033859 | 74   |
| TU-1238 | FWD | 2033677 | 2034727 | 1050 MU-763               | 2033789 hchA                                         | hchA | 2033859 | 70   |
| TU-1239 | FWD | 2033677 | 2034727 | 1050 MU-763               | 2033804 hchA                                         | hchA | 2033859 | 55   |
| TU-1240 | FWD | 2036977 | 2037677 | 700 MU-764                | 2036955 yedX                                         | yedX | 2036980 | 25   |
| TU-1241 | FWD | 2037752 | 2039127 | 1375 MU-765               | 2037773 yedY;yedZ                                    | yedY | 2037502 | -271 |
| TU-1242 | FWD | 2039377 | 2040127 | 750 MU-766                | 2039362 yodA                                         | yodA | 2039399 | 37   |
| TU-1243 | FWD | 2039377 | 2040127 | 750 MU-766                | 2039368 yodA                                         | yodA | 2039399 | 31   |
| TU-1244 | FWD | 2039377 | 2040127 | 750 MU-766                | 2039374 yodA                                         | yodA | 2039399 | 25   |
| TU-1245 | FWD | 2039377 | 2040127 | 750 MU-766                | 2039382 yodA                                         | yodA | 2039399 | 17   |
| TU-1246 | FWD | 2040152 | 2041112 | 960 MU-767                | 2039935 yodB                                         | yodB | 2040392 | 457  |
| TU-1247 | FWD | 2041462 | 2042539 | 1077 MU-768               | 2041628 mtfA                                         | mtfA | 2041675 | 47   |
| TU-1248 | FWD | 2042589 | 2042739 | 150 MU-769                | 2042462 asnT                                         | asnT | 2042573 | 111  |
| TU-1249 | FWD | 2042962 | 2050038 | 7076 MU-770               | yeeJ                                                 | yeeJ | 2042962 |      |
| TU-1250 | FWD | 2047789 | 2049889 | 2100 MU-771               | 2047956 NT                                           |      |         |      |
| TU-1251 | FWD | 2051614 | 2052989 | 1375 MU-772               | 2051590 shiA                                         | shiA | 2051667 | 77   |
| TU-1252 | FWD | 2053064 | 2054514 | 1450 MU-773               | 2053054 amn                                          | amn  | 2053085 | 31   |
| TU-1253 | FWD | 2054864 | 2055564 | 700 MU-774                | 2054822 yeeN                                         | yeeN | 2054882 | 60   |
| TU-1254 | FWD | 2054864 | 2055564 | 700 MU-774                | 2054830 yeeN                                         | yeeN | 2054882 | 52   |
| TU-1255 | FWD | 2054864 | 2055564 | 700 MU-774                | 2054841 yeeN                                         | yeeN | 2054882 | 41   |
| TU-1256 | FWD | 2054864 | 2055564 | 700 MU-774                | 2054850 yeeN                                         | yeeN | 2054882 | 32   |
| TU-1257 | FWD | 2054864 | 2055564 | 700 MU-774                | 2054862 yeeN                                         | yeeN | 2054882 | 20   |
| TU-1258 | FWD | 2057884 | 2058034 | 150 MU-775                | 2057875 asnU                                         | asnU | 2057875 | 0    |
| TU-1259 | FWD | 2060284 | 2060359 | 75 MU-776                 | asnV                                                 | asnV | 2060284 |      |
| TU-1260 | FWD | 2066659 | 2066909 | 250 MU-777                | 2066552 yoeA                                         | yoeA | 2066659 | 107  |
| TU-1261 | FWD | 2066934 | 2067209 | 275 MU-778                | NT                                                   |      |         |      |
| TU-1262 | FWD | 2068284 | 2068509 | 225 MU-779                | 2068330 yoeA                                         | yoeA | 2068294 | -36  |
| TU-1263 | FWD | 2068584 | 2069234 | 650 MU-780                | 2068543 yeeP                                         | yeeP | 2068684 | 141  |
| TU-1264 | FWD | 2069434 | 2069459 | 25 MU-781                 | 2069348 isrC                                         | isrC | 2069339 | -9   |
| TU-1265 | FWD | 2069536 | 2072686 | 3150 MU-782               | 2069496 flu                                          | flu  | 2069563 | 67   |
| TU-1266 | FWD | 2069536 | 2072686 | 3150 MU-782               | 2069533 flu                                          | flu  | 2069563 | 30   |
| TU-1267 | FWD | 2072803 | 2076131 | 3328 MU-783               | yeeR;yeeS;yeeT;yeeU;yeeV;yeeW                        | yeeR | 2072803 |      |
| TU-1268 | FWD | 2074332 | 2076131 | 1799 MU-784               | 2074114 yeeS;yeeT;yeeU;yeeV;yeeW                     | yeeS | 2074332 | 218  |
| TU-1269 | FWD | 2076086 | 2076136 | 50 MU-785                 | 2076053 NT                                           |      |         |      |
| TU-1270 | FWD | 2076770 | 2076955 | 185 MU-786                | yoeF                                                 | yoeF | 2076770 |      |
| TU-1271 | FWD | 2080786 | 2082186 | 1400 MU-787               | 2080756 sbcB                                         | sbcB | 2080780 | 24   |
| TU-1272 | FWD | 2087986 | 2095261 | 7275 MU-788;MU-789;MU-790 | 2087989 hisL;hisG;hisD;hisC;hisB;hisH;hisA;hisF;hisI | hisL | 2088020 | 31   |
| TU-1273 | FWD | 2087986 | 2095261 | 7275 MU-788;MU-789;MU-790 | 2088018 hisL;hisG;hisD;hisC;hisB;hisH;hisA;hisF;hisI | hisL | 2088020 | 2    |
| TU-1274 | FWD | 2088186 | 2095261 | 7075 MU-789;MU-790        | 2088157 hisG;hisD;hisC;hisB;hisH;hisA;hisF;hisI      | hisG | 2088216 | 59   |

|         |     |         |         |                            |                                                 |      |         |      |
|---------|-----|---------|---------|----------------------------|-------------------------------------------------|------|---------|------|
| TU-1275 | FWD | 2088186 | 2095261 | 7075 MU-789;MU-790         | 2088187 hisG;hisD;hisC;hisB;hisH;hisA;hisF;hisI | hisG | 2088216 | 29   |
| TU-1276 | FWD | 2088186 | 2095261 | 7075 MU-789;MU-790         | 2088197 hisG;hisD;hisC;hisB;hisH;hisA;hisF;hisI | hisG | 2088216 | 19   |
| TU-1277 | FWD | 2094636 | 2095261 | 625 MU-790                 | 2094440 hisI                                    | hisI | 2094638 | 198  |
| TU-1278 | FWD | 2094636 | 2095261 | 625 MU-790                 | 2094579 hisI                                    | hisI | 2094638 | 59   |
| TU-1279 | FWD | 2135916 | 2137541 | 1625 MU-791                | 2135887 yegH                                    | yegH | 2135926 | 39   |
| TU-1280 | FWD | 2137591 | 2137691 | 100 MU-792                 | 2137557 NT                                      |      |         |      |
| TU-1281 | FWD | 2141266 | 2144541 | 3275 MU-793                | 2141248 yegE                                    | yegE | 2141290 | 42   |
| TU-1282 | FWD | 2141266 | 2144541 | 3275 MU-793                | 2141382 yegE                                    | yegE | 2141290 | -92  |
| TU-1283 | FWD | 2145716 | 2146991 | 1275 MU-794                | 2145873 yegD                                    | yegD | 2145698 | -175 |
| TU-1284 | FWD | 2149209 | 2149670 | 461 MU-795                 | yegJ                                            | yegJ | 2149209 |      |
| TU-1285 | FWD | 2151241 | 2151441 | 200 MU-796                 | 2151335 ryeC                                    | ryeC | 2151333 | -2   |
| TU-1286 | FWD | 2151691 | 2151841 | 150 MU-797                 | 2151670 ryeD                                    | ryeD | 2151668 | -2   |
| TU-1287 | FWD | 2152066 | 2163016 | 10950 MU-798;MU-799;MU-800 | 2152003 mdtA;mdtB;mdtC;mdtD;baeS;baeR           | mdtA | 2152040 | 37   |
| TU-1288 | FWD | 2159266 | 2163016 | 3750 MU-799;MU-800         | 2159215 mdtD;baeS;baeR                          | mdtD | 2159488 | 273  |
| TU-1289 | FWD | 2159266 | 2163016 | 3750 MU-799;MU-800         | 2159276 mdtD;baeS;baeR                          | mdtD | 2159488 | 212  |
| TU-1290 | FWD | 2162291 | 2163016 | 725 MU-800                 | 2162220 baeR                                    | baeR | 2162300 | 80   |
| TU-1291 | FWD | 2163166 | 2163591 | 425 MU-801                 | 2163156 yegP                                    | yegP | 2163213 | 57   |
| TU-1292 | FWD | 2163616 | 2165041 | 1425 MU-802                | 2163618 yegQ                                    | yegQ | 2163692 | 74   |
| TU-1293 | FWD | 2165116 | 2165166 | 50 MU-803                  | 2165138 ryeE                                    | ryeE | 2165136 | -2   |
| TU-1294 | FWD | 2166741 | 2167591 | 850 MU-804                 | 2166709 yegS                                    | yegS | 2166736 | 27   |
| TU-1295 | FWD | 2168216 | 2169541 | 1325 MU-805                | insE;insF                                       | insE | 2168251 |      |
| TU-1296 | FWD | 2176843 | 2180083 | 3240 MU-806                | yegT;yegU;yegV                                  | yegT | 2176843 |      |
| TU-1297 | FWD | 2183966 | 2184591 | 625 MU-807                 | 2183945 rcnA                                    | rcnA | 2183939 | -6   |
| TU-1298 | FWD | 2183966 | 2184591 | 625 MU-807                 | 2183960 rcnA                                    | rcnA | 2183939 | -21  |
| TU-1299 | FWD | 2184916 | 2185266 | 350 MU-808                 | 2184884 yohN                                    | yohN | 2184982 | 98   |
| TU-1300 | FWD | 2184916 | 2185266 | 350 MU-808                 | 2184935 yohN                                    | yohN | 2184982 | 47   |
| TU-1301 | FWD | 2192291 | 2194341 | 2050 MU-809                | 2192291 metG                                    | metG | 2192322 | 31   |
| TU-1302 | FWD | 2194496 | 2202311 | 7815 MU-810                | yehH;yehI;yehK                                  | yehH | 2194496 |      |
| TU-1303 | FWD | 2202618 | 2209122 | 6504 MU-811                | yehL;yehM;yehP;yehQ                             | yehL | 2202618 |      |
| TU-1304 | FWD | 2209247 | 2209708 | 461 MU-812                 | yehR                                            | yehR | 2209247 |      |
| TU-1305 | FWD | 2212793 | 2213593 | 800 MU-813                 | 2212711 mlrA                                    | mlrA | 2212888 | 177  |
| TU-1306 | FWD | 2213693 | 2213868 | 175 MU-814                 | 2213656 yohO                                    | yohO | 2213679 | 23   |
| TU-1307 | FWD | 2216118 | 2216318 | 200 MU-815                 | 2216103 NT                                      |      |         |      |
| TU-1308 | FWD | 2220143 | 2221968 | 1825 MU-816                | 2220176 dld                                     | dld  | 2220207 | 31   |
| TU-1309 | FWD | 2223818 | 2224443 | 625 MU-817                 | 2223799 yohD                                    | yohD | 2223823 | 24   |
| TU-1310 | FWD | 2226993 | 2227468 | 475 MU-818                 | 2226980 NT                                      |      |         |      |
| TU-1311 | FWD | 2228543 | 2229443 | 900 MU-819                 | 2228625 yohJ;yohK                               | yohJ | 2228646 | 21   |
| TU-1312 | FWD | 2229468 | 2230668 | 1200 MU-820                | 2229842 cdd                                     | cdd  | 2229866 | 24   |
| TU-1313 | FWD | 2230918 | 2231818 | 900 MU-821                 | 2230872 sanA;yeiS                               | sanA | 2230900 | 28   |
| TU-1314 | FWD | 2232018 | 2234496 | 2478 MU-822                | 2232004 yeiT;yeiA                               | yeiT | 2232055 | 51   |
| TU-1315 | FWD | 2232018 | 2234496 | 2478 MU-822                | 2232009 yeiT;yeiA                               | yeiT | 2232055 | 46   |
| TU-1316 | FWD | 2241846 | 2242671 | 825 MU-823                 | 2241903 yeiG                                    | yeiG | 2241932 | 29   |
| TU-1317 | FWD | 2247971 | 2248446 | 475 MU-824                 | 2247690 yeiH                                    | yeiH | 2247739 | 49   |
| TU-1318 | FWD | 2248746 | 2250646 | 1900 MU-825                | 2248828 nfo;yeiI                                | nfo  | 2248862 | 34   |
| TU-1319 | FWD | 2253377 | 2254036 | 659 MU-826                 | 2253259 yeiL                                    | yeiL | 2253377 | 118  |
| TU-1320 | FWD | 2261885 | 2263066 | 1181 MU-827                | setB                                            | setB | 2261885 |      |

|         |     |         |         |                           |                                            |      |         |  |     |
|---------|-----|---------|---------|---------------------------|--------------------------------------------|------|---------|--|-----|
| TU-1321 | FWD | 2262871 | 2263371 | 500 MU-828                | 2262767 NT                                 |      |         |  |     |
| TU-1322 | FWD | 2263421 | 2264021 | 600 MU-829                | 2263437 yeiP                               | yeiP | 2263472 |  | 35  |
| TU-1323 | FWD | 2263421 | 2264021 | 600 MU-829                | 2263442 yeiP                               | yeiP | 2263472 |  | 30  |
| TU-1324 | FWD | 2263421 | 2264021 | 600 MU-829                | 2263448 yeiP                               | yeiP | 2263472 |  | 24  |
| TU-1325 | FWD | 2263421 | 2264021 | 600 MU-829                | 2263464 yeiP                               | yeiP | 2263472 |  | 8   |
| TU-1326 | FWD | 2264296 | 2265696 | 1400 MU-830               | 2264236 yeiQ                               | yeiQ | 2264267 |  | 31  |
| TU-1327 | FWD | 2265846 | 2267496 | 1650 MU-831               | 2265820 yeiR;lpdT                          | yeiR | 2265851 |  | 31  |
| TU-1328 | FWD | 2267846 | 2268596 | 750 MU-832                | 2267942 spr                                | spr  | 2268001 |  | 59  |
| TU-1329 | FWD | 2267846 | 2268596 | 750 MU-832                | 2267949 spr                                | spr  | 2268001 |  | 52  |
| TU-1330 | FWD | 2267846 | 2268596 | 750 MU-832                | 2267996 spr                                | spr  | 2268001 |  | 5   |
| TU-1331 | FWD | 2268621 | 2270171 | 1550 MU-833               | 2268700 rtn                                | rtn  | 2268748 |  | 48  |
| TU-1332 | FWD | 2270371 | 2275796 | 5425 MU-834;MU-835;MU-836 | 2270390 yejA;yejB;yejE;yejF                | yejA | 2270386 |  | -4  |
| TU-1333 | FWD | 2271946 | 2275796 | 3850 MU-835;MU-836        | 2271987 yejB;yejE;yejF                     | yejB | 2272201 |  | 214 |
| TU-1334 | FWD | 2273121 | 2275796 | 2675 MU-836               | 2273017 yejE;yejF                          | yejE | 2273295 |  | 278 |
| TU-1335 | FWD | 2273121 | 2275796 | 2675 MU-836               | 2273178 yejE;yejF                          | yejE | 2273295 |  | 117 |
| TU-1336 | FWD | 2276421 | 2277471 | 1050 MU-837               | 2276513 NT                                 |      |         |  |     |
| TU-1337 | FWD | 2278621 | 2280196 | 1575 MU-838               | 2278630 yejH                               | yejH | 2278654 |  | 24  |
| TU-1338 | FWD | 2280471 | 2280821 | 350 MU-839                | 2280402 rplY                               | rplY | 2280539 |  | 137 |
| TU-1339 | FWD | 2282022 | 2284122 | 2100 MU-840               | 2282124 yejL;yejM                          | yejL | 2282151 |  | 27  |
| TU-1340 | FWD | 2284197 | 2284297 | 100 MU-841                | 2284233 proL                               | proL | 2284233 |  | 0   |
| TU-1341 | FWD | 2288388 | 2289388 | 1000 MU-842               | 2288371 narP                               | narP | 2288522 |  | 151 |
| TU-1342 | FWD | 2288388 | 2289388 | 1000 MU-842               | 2288391 narP                               | narP | 2288522 |  | 131 |
| TU-1343 | FWD | 2288388 | 2289388 | 1000 MU-842               | 2288444 narP                               | narP | 2288522 |  | 78  |
| TU-1344 | FWD | 2301663 | 2301688 | 25 MU-843                 | 2301615 yojO                               | yojO | 2301628 |  | 13  |
| TU-1345 | FWD | 2301863 | 2303063 | 1200 MU-844               | 2301894 eco                                | eco  | 2301927 |  | 33  |
| TU-1346 | FWD | 2307050 | 2307150 | 100 MU-845                | 2307005 NT                                 |      |         |  |     |
| TU-1347 | FWD | 2311125 | 2311175 | 50 MU-846                 | 2311106 micF                               | micF | 2311106 |  | 0   |
| TU-1348 | FWD | 2311500 | 2313875 | 2375 MU-847               | 2311474 rcsD                               | rcsD | 2311510 |  | 36  |
| TU-1349 | FWD | 2313900 | 2314925 | 1025 MU-848               | 2314084 rcsB                               | rcsB | 2314199 |  | 115 |
| TU-1350 | FWD | 2313900 | 2314925 | 1025 MU-848               | 2314140 rcsB                               | rcsB | 2314199 |  | 59  |
| TU-1351 | FWD | 2318075 | 2320425 | 2350 MU-849               | 2318037 atoS;atoC                          | atoS | 2318065 |  | 28  |
| TU-1352 | FWD | 2321469 | 2325315 | 3846 MU-850               | atoD;atoA;atoE;atoB                        | atoD | 2321469 |  |     |
| TU-1353 | FWD | 2337575 | 2338475 | 900 MU-851                | 2337562 ubiG                               | ubiG | 2337589 |  | 27  |
| TU-1354 | FWD | 2339250 | 2339425 | 175 MU-852                | 2339227 NT                                 |      |         |  |     |
| TU-1355 | FWD | 2342800 | 2346725 | 3925 MU-853;MU-854        | 2342780 nrdA;nrdB;yfaE                     | nrdA | 2342887 |  | 107 |
| TU-1356 | FWD | 2345275 | 2346725 | 1450 MU-854               | 2345374 nrdB;yfaE                          | nrdB | 2345406 |  | 32  |
| TU-1357 | FWD | 2347673 | 2347915 | 242 MU-855                | yfaH                                       | yfaH | 2347673 |  |     |
| TU-1358 | FWD | 2348025 | 2348225 | 200 MU-856                | 2347962 NT                                 |      |         |  |     |
| TU-1359 | FWD | 2350728 | 2354178 | 3450 MU-857               | 2350615 glpA;glpB;glpC                     | glpA | 2350669 |  | 54  |
| TU-1360 | FWD | 2354926 | 2355825 | 899 MU-858                | yfaD                                       | yfaD | 2354926 |  |     |
| TU-1361 | FWD | 2355604 | 2356154 | 550 MU-859                | 2355575 ypaA                               | ypaA | 2355838 |  | 263 |
| TU-1362 | FWD | 2362604 | 2362854 | 250 MU-860                | 2362549 nudI                               | nudI | 2362576 |  | 27  |
| TU-1363 | FWD | 2363879 | 2371279 | 7400 MU-861;MU-862;MU-863 | 2363738 arnB;arnC;arnA;arnD;arnT;arnE;arnF | arnB | 2363950 |  | 212 |
| TU-1364 | FWD | 2367379 | 2371279 | 3900 MU-862;MU-863        | 2367286 arnD;arnT;arnE;arnF                | arnD | 2368040 |  | 754 |
| TU-1365 | FWD | 2367379 | 2371279 | 3900 MU-862;MU-863        | 2367400 arnD;arnT;arnE;arnF                | arnD | 2368040 |  | 640 |
| TU-1366 | FWD | 2370254 | 2371279 | 1025 MU-863               | 2370154 arnE;arnF                          | arnE | 2370579 |  | 425 |

|         |     |         |         |                    |                               |      |         |     |
|---------|-----|---------|---------|--------------------|-------------------------------|------|---------|-----|
| TU-1367 | FWD | 2379629 | 2380504 | 875 MU-864         | 2379604 rbn                   | rbn  | 2379630 | 26  |
| TU-1368 | FWD | 2379629 | 2380504 | 875 MU-864         | 2379610 rbn                   | rbn  | 2379630 | 20  |
| TU-1369 | FWD | 2380735 | 2381946 | 1211 MU-865        | elaD                          | elaD | 2380735 |     |
| TU-1370 | FWD | 2383882 | 2385459 | 1577 MU-866        | 2383830 yfbL;yfbM             | yfbL | 2383882 | 52  |
| TU-1371 | FWD | 2386630 | 2388005 | 1375 MU-867        | 2386595 yfbO;yfbP             | yfbO | 2386603 | 8   |
| TU-1372 | FWD | 2405547 | 2407697 | 2150 MU-868;MU-869 | 2405531 yfbQ;yfbR             | yfbQ | 2405583 | 52  |
| TU-1373 | FWD | 2406897 | 2407697 | 800 MU-869         | 2406858 yfbR                  | yfbR | 2406884 | 26  |
| TU-1374 | FWD | 2411297 | 2414872 | 3575 MU-870;MU-871 | 2411366 ackA;pta              | ackA | 2411492 | 126 |
| TU-1375 | FWD | 2411297 | 2412697 | 1400 MU-870        | 2411459 ackA;pta              | ackA | 2411492 | 33  |
| TU-1376 | FWD | 2412747 | 2414872 | 2125 MU-871        | 2412727 pta                   | pta  | 2412769 | 42  |
| TU-1377 | FWD | 2415122 | 2416472 | 1350 MU-872        | yfcC                          | yfcC | 2415103 |     |
| TU-1378 | FWD | 2418647 | 2419222 | 575 MU-873         | 2418614 yfcG                  | yfcG | 2418643 | 29  |
| TU-1379 | FWD | 2419272 | 2420747 | 1475 MU-874;MU-875 | 2419323 folX;yfcH             | folX | 2419347 | 24  |
| TU-1380 | FWD | 2419722 | 2420747 | 1025 MU-875        | 2419630 yfcH                  | yfcH | 2419730 | 100 |
| TU-1381 | FWD | 2435947 | 2437022 | 1075 MU-876        | 2435951 flk                   | flk  | 2435972 | 21  |
| TU-1382 | FWD | 2439797 | 2441822 | 2025 MU-877        | 2439761 mnmC                  | mnmC | 2439786 | 25  |
| TU-1383 | FWD | 2446498 | 2447298 | 800 MU-878         | 2446603 yfcN                  | yfcN | 2446628 | 25  |
| TU-1384 | FWD | 2459250 | 2460625 | 1375 MU-879        | 2459227 fadL                  | fadL | 2459328 | 101 |
| TU-1385 | FWD | 2461034 | 2462092 | 1058 MU-880        | yfdF                          | yfdF | 2461034 |     |
| TU-1386 | FWD | 2463328 | 2464228 | 900 MU-881         | 2463296 yfdC                  | yfdC | 2463323 | 27  |
| TU-1387 | FWD | 2464353 | 2464428 | 75 MU-882          | 2464331 argW                  | argW | 2464331 | 0   |
| TU-1388 | FWD | 2464578 | 2465778 | 1200 MU-883        | 2464537 intS                  | intS | 2464567 | 30  |
| TU-1389 | FWD | 2464578 | 2465778 | 1200 MU-883        | 2464558 intS                  | intS | 2464567 | 9   |
| TU-1390 | FWD | 2465878 | 2468403 | 2525 MU-884;MU-885 | 2465852 yfdG;yfdH;yfdI        | yfdG | 2465877 | 25  |
| TU-1391 | FWD | 2465878 | 2468403 | 2525 MU-884;MU-885 | 2465858 yfdG;yfdH;yfdI        | yfdG | 2465877 | 19  |
| TU-1392 | FWD | 2466953 | 2468403 | 1450 MU-885        | 2467044 yfdI                  | yfdI | 2467153 | 109 |
| TU-1393 | FWD | 2466953 | 2468403 | 1450 MU-885        | 2467055 yfdI                  | yfdI | 2467153 | 98  |
| TU-1394 | FWD | 2468778 | 2469228 | 450 MU-886         | 2468770 tfaS                  | tfaS | 2468837 | 67  |
| TU-1395 | FWD | 2471626 | 2474253 | 2627 MU-887        | yfdP;yfdQ;yfdR;yfdS;yfdT;ypdJ | yfdP | 2471626 |     |
| TU-1396 | FWD | 2474278 | 2474553 | 275 MU-888         | torI                          | torI | 2474332 |     |
| TU-1397 | FWD | 2474606 | 2474620 | 14 MU-889          | pawZ                          | pawZ | 2474606 |     |
| TU-1398 | FWD | 2475869 | 2478128 | 2259 MU-890;MU-891 | dsdX;dsdA                     | dsdX | 2475869 |     |
| TU-1399 | FWD | 2477078 | 2478128 | 1050 MU-891        | 2477127 dsdA                  | dsdA | 2477224 | 97  |
| TU-1400 | FWD | 2477078 | 2478128 | 1050 MU-891        | 2477132 dsdA                  | dsdA | 2477224 | 92  |
| TU-1401 | FWD | 2481679 | 2483754 | 2075 MU-892        | 2481652 evgA;evgS             | evgA | 2481777 | 125 |
| TU-1402 | FWD | 2481679 | 2483754 | 2075 MU-892        | 2481663 evgA;evgS             | evgA | 2481777 | 114 |
| TU-1403 | FWD | 2484079 | 2485704 | 1625 MU-893        | 2483950 NT                    |      |         |     |
| TU-1404 | FWD | 2492720 | 2492995 | 275 MU-894         | ypdI                          | ypdI | 2492720 |     |
| TU-1405 | FWD | 2493529 | 2493779 | 250 MU-895         | 2493621 lpxP                  | lpxP | 2493667 | 46  |
| TU-1406 | FWD | 2494829 | 2495004 | 175 MU-896         | 2494819 NT                    |      |         |     |
| TU-1407 | FWD | 2497029 | 2499129 | 2100 MU-897        | 2496668 ypdA;ypdB             | ypdA | 2496693 | 25  |
| TU-1408 | FWD | 2499204 | 2499879 | 675 MU-898         | 2499128 ypdC                  | ypdC | 2499152 | 24  |
| TU-1409 | FWD | 2507529 | 2508879 | 1350 MU-899        | 2507477 yfeO                  | yfeO | 2507652 | 175 |
| TU-1410 | FWD | 2508954 | 2509404 | 450 MU-900         | 2508983 ypeC                  | ypeC | 2509023 | 40  |
| TU-1411 | FWD | 2510829 | 2512379 | 1550 MU-901        | 2510904 nupC                  | nupC | 2511064 | 160 |
| TU-1412 | FWD | 2510829 | 2512379 | 1550 MU-901        | 2511000 nupC                  | nupC | 2511064 | 64  |

|         |     |         |         |                    |                             |      |         |      |
|---------|-----|---------|---------|--------------------|-----------------------------|------|---------|------|
| TU-1413 | FWD | 2510829 | 2512379 | 1550 MU-901        | 2511032 nupC                | nupC | 2511064 | 32   |
| TU-1414 | FWD | 2512404 | 2513604 | 1200 MU-902        | 2512273 insL                | insL | 2512353 | 80   |
| TU-1415 | FWD | 2516479 | 2517204 | 725 MU-903         | 2516429 yfeC;yfeD           | yfeC | 2516489 | 60   |
| TU-1416 | FWD | 2516479 | 2517204 | 725 MU-903         | 2516468 yfeC;yfeD           | yfeC | 2516489 | 21   |
| TU-1417 | FWD | 2518929 | 2519504 | 575 MU-904         | 2518953 valU;valX;valY;lysV | valU | 2518953 | 0    |
| TU-1418 | FWD | 2523180 | 2523881 | 701 MU-905         | 2523196 yfeN                | yfeN | 2523149 | -47  |
| TU-1419 | FWD | 2524956 | 2526106 | 1150 MU-906        | 2524948 yfeH                | yfeH | 2524968 | 20   |
| TU-1420 | FWD | 2529481 | 2530131 | 650 MU-907         | 2529446 cysZ                | cysZ | 2529485 | 39   |
| TU-1421 | FWD | 2530381 | 2531581 | 1200 MU-908        | 2530399 cysK                | cysK | 2530431 | 32   |
| TU-1422 | FWD | 2530381 | 2531581 | 1200 MU-908        | 2530408 cysK                | cysK | 2530431 | 23   |
| TU-1423 | FWD | 2530381 | 2531581 | 1200 MU-908        | 2530418 cysK                | cysK | 2530431 | 13   |
| TU-1424 | FWD | 2531606 | 2534381 | 2775 MU-909;MU-910 | 2531523 ptsH;ptsI;crr       | ptsH | 2531786 | 263  |
| TU-1425 | FWD | 2531606 | 2534381 | 2775 MU-909;MU-910 | 2531529 ptsH;ptsI;crr       | ptsH | 2531786 | 257  |
| TU-1426 | FWD | 2531606 | 2534381 | 2775 MU-909;MU-910 | 2531614 ptsH;ptsI;crr       | ptsH | 2531786 | 172  |
| TU-1427 | FWD | 2531606 | 2534381 | 2775 MU-909;MU-910 | 2531617 ptsH;ptsI;crr       | ptsH | 2531786 | 169  |
| TU-1428 | FWD | 2531606 | 2534381 | 2775 MU-909;MU-910 | 2531710 ptsH;ptsI;crr       | ptsH | 2531786 | 76   |
| TU-1429 | FWD | 2531606 | 2534381 | 2775 MU-909;MU-910 | 2531713 ptsH;ptsI;crr       | ptsH | 2531786 | 73   |
| TU-1430 | FWD | 2531606 | 2534381 | 2775 MU-909;MU-910 | 2531754 ptsH;ptsI;crr       | ptsH | 2531786 | 32   |
| TU-1431 | FWD | 2531606 | 2534381 | 2775 MU-909;MU-910 | 2531757 ptsH;ptsI;crr       | ptsH | 2531786 | 29   |
| TU-1432 | FWD | 2531606 | 2534381 | 2775 MU-909;MU-910 | 2531761 ptsH;ptsI;crr       | ptsH | 2531786 | 25   |
| TU-1433 | FWD | 2533606 | 2534381 | 775 MU-910         | 2533502 crr                 | crr  | 2533856 | 354  |
| TU-1434 | FWD | 2533606 | 2534381 | 775 MU-910         | 2533632 crr                 | crr  | 2533856 | 224  |
| TU-1435 | FWD | 2533606 | 2534381 | 775 MU-910         | 2533789 crr                 | crr  | 2533856 | 67   |
| TU-1436 | FWD | 2533606 | 2534381 | 775 MU-910         | 2533815 crr                 | crr  | 2533856 | 41   |
| TU-1437 | FWD | 2533606 | 2534381 | 775 MU-910         | 2533834 crr                 | crr  | 2533856 | 22   |
| TU-1438 | FWD | 2535431 | 2535756 | 325 MU-911         | 2535337 yfeK                | yfeK | 2535364 | 27   |
| TU-1439 | FWD | 2535856 | 2536656 | 800 MU-912         | 2535779 yfeS                | yfeS | 2535771 | -8   |
| TU-1440 | FWD | 2541735 | 2541785 | 50 MU-913          | NT                          |      |         |      |
| TU-1441 | FWD | 2543810 | 2545910 | 2100 MU-914        | 2543753 murQ;murP           | murQ | 2543795 | 42   |
| TU-1442 | FWD | 2543810 | 2545910 | 2100 MU-914        | 2543763 murQ;murP           | murQ | 2543795 | 32   |
| TU-1443 | FWD | 2546510 | 2547560 | 1050 MU-915        | 2546310 yfeW                | yfeW | 2546124 | -186 |
| TU-1444 | FWD | 2550310 | 2552110 | 1800 MU-916        | 2550264 amiA;hemF           | amiA | 2550374 | 110  |
| TU-1445 | FWD | 2550310 | 2552110 | 1800 MU-916        | 2550301 amiA;hemF           | amiA | 2550374 | 73   |
| TU-1446 | FWD | 2555360 | 2555960 | 600 MU-917         | 2555334 NT                  |      |         |      |
| TU-1447 | FWD | 2556810 | 2558085 | 1275 MU-918        | 2556798 intZ                | intZ | 2556880 | 82   |
| TU-1448 | FWD | 2558385 | 2558860 | 475 MU-919         | 2558357 yffL                | yffL | 2558279 | -78  |
| TU-1449 | FWD | 2558385 | 2558860 | 475 MU-919         | 2558413 yffL                | yffL | 2558279 | -134 |
| TU-1450 | FWD | 2559390 | 2560015 | 625 MU-920         | yffM;yffN                   | yffM | 2559390 |      |
| TU-1451 | FWD | 2560136 | 2561136 | 1000 MU-921        | 2560064 yffO;yffP           | yffO | 2560133 | 69   |
| TU-1452 | FWD | 2561586 | 2561786 | 200 MU-922         | 2561495 yffQ                | yffQ | 2561614 | 119  |
| TU-1453 | FWD | 2561936 | 2562461 | 525 MU-923         | 2561969 yffR                | yffR | 2562002 | 33   |
| TU-1454 | FWD | 2561936 | 2562461 | 525 MU-923         | 2561982 yffR                | yffR | 2562002 | 20   |
| TU-1455 | FWD | 2562561 | 2563311 | 750 MU-924         | 2562517 yffS                | yffS | 2562545 | 28   |
| TU-1456 | FWD | 2570187 | 2570462 | 275 MU-925         | NT                          |      |         |      |
| TU-1457 | FWD | 2576637 | 2579762 | 3125 MU-926        | 2576628 talA;tktB           | talA | 2576688 | 60   |
| TU-1458 | FWD | 2576637 | 2579762 | 3125 MU-926        | 2576664 talA;tktB           | talA | 2576688 | 24   |



|         |     |         |         |                           |                                                             |       |         |     |
|---------|-----|---------|---------|---------------------------|-------------------------------------------------------------|-------|---------|-----|
| TU-1459 | FWD | 2583613 | 2585113 | 1500 MU-927               | 2583542 narQ                                                | narQ  | 2583753 | 211 |
| TU-1460 | FWD | 2583613 | 2585113 | 1500 MU-927               | 2583590 narQ                                                | narQ  | 2583753 | 163 |
| TU-1461 | FWD | 2585563 | 2587788 | 2225 MU-928               | 2585611 acrD                                                | acrD  | 2585617 | 6   |
| TU-1462 | FWD | 2589188 | 2591263 | 2075 MU-929;MU-930;MU-931 | 2589198 yffB;dapE;ypfN                                      | yffB  | 2589269 | 71  |
| TU-1463 | FWD | 2589438 | 2591263 | 1825 MU-930;MU-931        | 2589582 dapE;ypfN                                           | dapE  | 2589629 | 47  |
| TU-1464 | FWD | 2590713 | 2591263 | 550 MU-931                | 2590733 ypfN                                                | ypfN  | 2590784 | 51  |
| TU-1465 | FWD | 2594813 | 2594988 | 175 MU-932                | 2594784 NT                                                  |       |         |     |
| TU-1466 | FWD | 2597863 | 2598963 | 1100 MU-933;MU-934        | 2597901 gcvR;bcp                                            | gcvR  | 2597928 | 27  |
| TU-1467 | FWD | 2598438 | 2598963 | 525 MU-934                | 2598431 bcp                                                 | bcp   | 2598500 | 69  |
| TU-1468 | FWD | 2598438 | 2598963 | 525 MU-934                | 2598450 bcp                                                 | bcp   | 2598500 | 50  |
| TU-1469 | FWD | 2598438 | 2598963 | 525 MU-934                | 2598459 bcp                                                 | bcp   | 2598500 | 41  |
| TU-1470 | FWD | 2598438 | 2598963 | 525 MU-934                | 2598466 bcp                                                 | bcp   | 2598500 | 34  |
| TU-1471 | FWD | 2599223 | 2612804 | 13581 MU-935              | hyfA;hyfB;hyfC;hyfD;hyfE;hyfF;hyfG;hyfH;hyfI;hyfJ;hyfR;focB | hyfA  | 2599223 |     |
| TU-1472 | FWD | 2614040 | 2616065 | 2025 MU-936               | 2614048 yfgC;yfgD                                           | yfgC  | 2614116 | 68  |
| TU-1473 | FWD | 2614040 | 2616065 | 2025 MU-936               | 2614090 yfgC;yfgD                                           | yfgC  | 2614116 | 26  |
| TU-1474 | FWD | 2619191 | 2620891 | 1700 MU-937               | 2619175 purM;purN                                           | purM  | 2619219 | 44  |
| TU-1475 | FWD | 2620966 | 2624653 | 3687 MU-938               | 2620970 ppk;ppx                                             | ppk   | 2621066 | 96  |
| TU-1476 | FWD | 2620966 | 2624653 | 3687 MU-938               | 2620980 ppk;ppx                                             | ppk   | 2621066 | 86  |
| TU-1477 | FWD | 2626078 | 2626153 | 75 MU-939                 | 2626040 NT                                                  |       |         |     |
| TU-1478 | FWD | 2627303 | 2627503 | 200 MU-940                | 2627274 yfgG                                                | yfgG  | 2627312 | 38  |
| TU-1479 | FWD | 2627878 | 2628853 | 975 MU-941                | 2627785 yfgH;yfgI                                           | yfgH  | 2627814 | 29  |
| TU-1480 | FWD | 2632253 | 2633753 | 1500 MU-942               | 2632219 xseA                                                | xseA  | 2632254 | 35  |
| TU-1481 | FWD | 2650430 | 2651355 | 925 MU-943                | 2650491 sseA                                                | sseA  | 2650516 | 25  |
| TU-1482 | FWD | 2651537 | 2651745 | 208 MU-944                | IS128                                                       | IS128 | 2651537 |     |
| TU-1483 | FWD | 2651899 | 2652149 | 250 MU-945                | 2651867 ryfA                                                | ryfA  | 2651877 | 10  |
| TU-1484 | FWD | 2661452 | 2662202 | 750 MU-946                | 2661428 suhB                                                | suhB  | 2661464 | 36  |
| TU-1485 | FWD | 2661452 | 2662202 | 750 MU-946                | 2661437 suhB                                                | suhB  | 2661464 | 27  |
| TU-1486 | FWD | 2662385 | 2663266 | 881 MU-947                | yfhR                                                        | yfhR  | 2662385 |     |
| TU-1487 | FWD | 2663452 | 2664952 | 1500 MU-948               | 2663423 csiE                                                | csiE  | 2663457 | 34  |
| TU-1488 | FWD | 2666202 | 2666327 | 125 MU-949                | 2666220 NT                                                  |       |         |     |
| TU-1489 | FWD | 2667227 | 2671777 | 4550 MU-950;MU-951        | 2667041 hcaE;hcaF;hcaC;hcaB;hcaD;yphA                       | hcaE  | 2667054 | 13  |
| TU-1490 | FWD | 2671302 | 2671777 | 475 MU-951                | 2671343 yphA                                                | yphA  | 2671368 | 25  |
| TU-1491 | FWD | 2680827 | 2682077 | 1250 MU-952               | 2680827 yphH                                                | yphH  | 2680885 | 58  |
| TU-1492 | FWD | 2682152 | 2682252 | 100 MU-953                | 2682044 NT                                                  |       |         |     |
| TU-1493 | FWD | 2683852 | 2685052 | 1200 MU-954               | 2683819 hmp                                                 | hmp   | 2683857 | 38  |
| TU-1494 | FWD | 2683852 | 2685052 | 1200 MU-954               | 2683831 hmp                                                 | hmp   | 2683857 | 26  |
| TU-1495 | FWD | 2693777 | 2694952 | 1175 MU-955               | 2693782 yfhD                                                | yfhD  | 2693823 | 41  |
| TU-1496 | FWD | 2696727 | 2698002 | 1275 MU-956;MU-957        | 2696762 yfhH;yfhL                                           | yfhH  | 2696781 | 19  |
| TU-1497 | FWD | 2697652 | 2698002 | 350 MU-957                | 2697658 yfhL                                                | yfhL  | 2697685 | 27  |
| TU-1498 | FWD | 2697652 | 2698002 | 350 MU-957                | 2697678 yfhL                                                | yfhL  | 2697685 | 7   |
| TU-1499 | FWD | 2698542 | 2698618 | 76 MU-958                 | ryfC                                                        | ryfC  | 2698542 |     |
| TU-1500 | FWD | 2708439 | 2710114 | 1675 MU-959               | 2708414 nadB                                                | nadB  | 2708442 | 28  |
| TU-1501 | FWD | 2710789 | 2712414 | 1625 MU-960               | 2710900 srmB                                                | srmB  | 2710918 | 18  |
| TU-1502 | FWD | 2713445 | 2714032 | 587 MU-961                | eamB                                                        | eamB  | 2713445 |     |
| TU-1503 | FWD | 2714764 | 2715564 | 800 MU-962                | 2714752 ung                                                 | ung   | 2714776 | 24  |

|         |     |         |         |                    |                               |      |         |     |
|---------|-----|---------|---------|--------------------|-------------------------------|------|---------|-----|
| TU-1504 | FWD | 2716714 | 2717164 | 450 MU-963         | 2716697 trxC                  | trxC | 2716757 | 60  |
| TU-1505 | FWD | 2717264 | 2720264 | 3000 MU-964        | 2717227 yfiP;yfiQ             | yfiP | 2717245 | 18  |
| TU-1506 | FWD | 2720314 | 2722089 | 1775 MU-965;MU-966 | 2720309 pssA                  | pssA | 2720749 | 440 |
| TU-1507 | FWD | 2720664 | 2722089 | 1425 MU-966        | 2720643 pssA                  | pssA | 2720749 | 106 |
| TU-1508 | FWD | 2720664 | 2722089 | 1425 MU-966        | 2720648 pssA                  | pssA | 2720749 | 101 |
| TU-1509 | FWD | 2720664 | 2722089 | 1425 MU-966        | 2720691 pssA                  | pssA | 2720749 | 58  |
| TU-1510 | FWD | 2722150 | 2722473 | 323 MU-967         | yfiM                          | yfiM | 2722150 |     |
| TU-1511 | FWD | 2723890 | 2724040 | 150 MU-968         | 2723856 NT                    |      |         |     |
| TU-1512 | FWD | 2733994 | 2734894 | 900 MU-969         | 2733982 bamD                  | bamD | 2734168 | 186 |
| TU-1513 | FWD | 2733994 | 2734894 | 900 MU-969         | 2734095 bamD                  | bamD | 2734168 | 73  |
| TU-1514 | FWD | 2733994 | 2734894 | 900 MU-969         | 2734107 bamD                  | bamD | 2734168 | 61  |
| TU-1515 | FWD | 2733994 | 2734894 | 900 MU-969         | 2734135 bamD                  | bamD | 2734168 | 33  |
| TU-1516 | FWD | 2735144 | 2735569 | 425 MU-970         | 2735146 raiA                  | raiA | 2735176 | 30  |
| TU-1517 | FWD | 2735144 | 2735569 | 425 MU-970         | 2735152 raiA                  | raiA | 2735176 | 24  |
| TU-1518 | FWD | 2735619 | 2736819 | 1200 MU-971        | 2735602 pheL;pheA             | pheL | 2735621 | 19  |
| TU-1519 | FWD | 2739394 | 2739744 | 350 MU-972         | 2739371 yfiL                  | yfiL | 2739382 | 11  |
| TU-1520 | FWD | 2739869 | 2742119 | 2250 MU-973        | 2739846 yfiR;yfiN;yfiB        | yfiR | 2739897 | 51  |
| TU-1521 | FWD | 2745970 | 2747970 | 2000 MU-974        | 2745953 ypjD;yfjD             | ypjD | 2745984 | 31  |
| TU-1522 | FWD | 2748745 | 2749645 | 900 MU-975         | 2748759 nadK                  | nadK | 2748853 | 94  |
| TU-1523 | FWD | 2748745 | 2749645 | 900 MU-975         | 2748788 nadK                  | nadK | 2748853 | 65  |
| TU-1524 | FWD | 2749820 | 2751470 | 1650 MU-976        | 2749782 recN                  | recN | 2749817 | 35  |
| TU-1525 | FWD | 2749820 | 2751470 | 1650 MU-976        | 2749795 recN                  | recN | 2749817 | 22  |
| TU-1526 | FWD | 2751520 | 2751970 | 450 MU-977         | 2751510 smpA                  | smpA | 2751627 | 117 |
| TU-1527 | FWD | 2751520 | 2751970 | 450 MU-977         | 2751542 smpA                  | smpA | 2751627 | 85  |
| TU-1528 | FWD | 2751520 | 2751970 | 450 MU-977         | 2751577 smpA                  | smpA | 2751627 | 50  |
| TU-1529 | FWD | 2751520 | 2751970 | 450 MU-977         | 2751616 smpA                  | smpA | 2751627 | 11  |
| TU-1530 | FWD | 2752820 | 2753495 | 675 MU-978         | 2752854 smpB                  | smpB | 2752918 | 64  |
| TU-1531 | FWD | 2752820 | 2753495 | 675 MU-978         | 2752896 smpB                  | smpB | 2752918 | 22  |
| TU-1532 | FWD | 2753620 | 2754020 | 400 MU-979         | 2753615 ssrA                  | ssrA | 2753615 | 0   |
| TU-1533 | FWD | 2754170 | 2755370 | 1200 MU-980        | 2754155 intA                  | intA | 2754181 | 26  |
| TU-1534 | FWD | 2754170 | 2755370 | 1200 MU-980        | 2754190 intA                  | intA | 2754181 | -9  |
| TU-1535 | FWD | 2755920 | 2756070 | 150 MU-981         | NT                            |      |         |     |
| TU-1536 | FWD | 2756666 | 2756878 | 212 MU-982         | 2756635 alpA                  | alpA | 2756666 | 31  |
| TU-1537 | FWD | 2757007 | 2759195 | 2188 MU-983        | yfjI;yfjJ                     | yfjI | 2757007 |     |
| TU-1538 | FWD | 2763411 | 2763811 | 400 MU-984         | 2763238 NT                    |      |         |     |
| TU-1539 | FWD | 2763936 | 2764486 | 550 MU-985         | 2763916 rnlA                  | rnlA | 2763940 | 24  |
| TU-1540 | FWD | 2763936 | 2764486 | 550 MU-985         | 2763922 rnlA                  | rnlA | 2763940 | 18  |
| TU-1541 | FWD | 2764511 | 2765461 | 950 MU-986         | 2764659 yfjO                  | yfjO | 2765006 | 347 |
| TU-1542 | FWD | 2764511 | 2765461 | 950 MU-986         | 2764729 yfjO                  | yfjO | 2765006 | 277 |
| TU-1543 | FWD | 2766092 | 2766592 | 500 MU-987         | yfjP;yfjQ                     | yfjP | 2765732 |     |
| TU-1544 | FWD | 2767725 | 2769637 | 1912 MU-988        | yfjR;ypjK;yfjS;yfjT           | yfjR | 2767725 |     |
| TU-1545 | FWD | 2769842 | 2770167 | 325 MU-989         | 2769830 NT                    |      |         |     |
| TU-1546 | FWD | 2771242 | 2772842 | 1600 MU-990        | 2771308 yfjW                  | yfjW | 2771340 | 32  |
| TU-1547 | FWD | 2773417 | 2773492 | 75 MU-991          | 2773413 NT                    |      |         |     |
| TU-1548 | FWD | 2773567 | 2775804 | 2237 MU-992        | ypjI;yfjX;yfjY;ypjJ;yfjZ;ypjF | ypjI | 2773567 |     |
| TU-1549 | FWD | 2775792 | 2776043 | 251 MU-993         | 2775809 psaA                  | psaA | 2775994 | 185 |

|         |     |         |         |                              |                                       |      |         |      |
|---------|-----|---------|---------|------------------------------|---------------------------------------|------|---------|------|
| TU-1550 | FWD | 2776893 | 2776993 | 100 MU-994                   | 2776786 NT                            |      |         |      |
| TU-1551 | FWD | 2784419 | 2786671 | 2252 MU-995                  | ygaQ                                  | ygaQ | 2784419 |      |
| TU-1552 | FWD | 2786976 | 2794352 | 7376 MU-996;MU-997;MU-998    | 2786949 csiD;ygaF;gabD;gabT;gabP;csiR | csiD | 2787007 | 58   |
| TU-1553 | FWD | 2788851 | 2794352 | 5501 MU-997;MU-998           | 2788933 gabD;gabT;gabP;csiR           | gabD | 2789295 | 362  |
| TU-1554 | FWD | 2788851 | 2794352 | 5501 MU-997;MU-998           | 2788948 gabD;gabT;gabP;csiR           | gabD | 2789295 | 347  |
| TU-1555 | FWD | 2793702 | 2794352 | 650 MU-998                   | 2793646 csiR                          | csiR | 2793696 | 50   |
| TU-1556 | FWD | 2795252 | 2796027 | 775 MU-999                   | 2795209 ygaV;ygaP                     | ygaV | 2795233 | 24   |
| TU-1557 | FWD | 2795252 | 2796027 | 775 MU-999                   | 2795219 ygaV;ygaP                     | ygaV | 2795233 | 14   |
| TU-1558 | FWD | 2797127 | 2797902 | 775 MU-1000                  | 2797144 ygaW                          | ygaW | 2797186 | 42   |
| TU-1559 | FWD | 2798177 | 2798502 | 325 MU-1001                  | 2798143 ygaM                          | ygaM | 2798156 | 13   |
| TU-1560 | FWD | 2798177 | 2798502 | 325 MU-1001                  | 2798150 ygaM                          | ygaM | 2798156 | 6    |
| TU-1561 | FWD | 2798702 | 2802478 | 3776 MU-1002                 | 2798678 nrdH;nrdI;nrdE;nrdF           | nrdH | 2798745 | 67   |
| TU-1562 | FWD | 2802828 | 2806028 | 3200 MU-1003                 | 2802587 proV;proW;proX                | proV | 2802837 | 250  |
| TU-1563 | FWD | 2802828 | 2806028 | 3200 MU-1003                 | 2802771 proV;proW;proX                | proV | 2802837 | 66   |
| TU-1564 | FWD | 2802828 | 2806028 | 3200 MU-1003                 | 2802782 proV;proW;proX                | proV | 2802837 | 55   |
| TU-1565 | FWD | 2806338 | 2807515 | 1177 MU-1004                 | ygaY                                  | ygaY | 2806338 |      |
| TU-1566 | FWD | 2807628 | 2808828 | 1200 MU-1005                 | 2807591 ygaZ;ygaH                     | ygaZ | 2807639 | 48   |
| TU-1567 | FWD | 2807628 | 2808828 | 1200 MU-1005                 | 2807602 ygaZ;ygaH                     | ygaZ | 2807639 | 37   |
| TU-1568 | FWD | 2807628 | 2808828 | 1200 MU-1005                 | 2807710 ygaZ;ygaH                     | ygaZ | 2807639 | -71  |
| TU-1569 | FWD | 2808853 | 2810103 | 1250 MU-1006                 | 2808717 mprA                          | mprA | 2808792 | 75   |
| TU-1570 | FWD | 2808853 | 2810103 | 1250 MU-1006                 | 2808741 mprA                          | mprA | 2808792 | 51   |
| TU-1571 | FWD | 2808853 | 2810103 | 1250 MU-1006                 | 2808755 mprA                          | mprA | 2808792 | 37   |
| TU-1572 | FWD | 2808853 | 2810103 | 1250 MU-1006                 | 2808768 mprA                          | mprA | 2808792 | 24   |
| TU-1573 | FWD | 2810128 | 2812178 | 2050 MU-1007                 | 2809360 emrA;emrB                     | emrA | 2809449 | 89   |
| TU-1574 | FWD | 2812831 | 2812856 | 25 MU-1008                   | 2812824 micA                          | micA | 2812824 | 0    |
| TU-1575 | FWD | 2823906 | 2826281 | 2375 MU-1009                 | 2823750 srlA;srlE;srlB;srlD           | srlA | 2823854 | 104  |
| TU-1576 | FWD | 2823906 | 2826281 | 2375 MU-1009                 | 2823813 srlA;srlE;srlB;srlD           | srlA | 2823854 | 41   |
| TU-1577 | FWD | 2826643 | 2827002 | 359 MU-1010                  | gutM                                  | gutM | 2826643 |      |
| TU-1578 | FWD | 2826981 | 2828756 | 1775 MU-1011;MU-1012         | 2826984 srlR;gutQ                     | srlR | 2827069 | 85   |
| TU-1579 | FWD | 2827781 | 2828756 | 975 MU-1012                  | 2827732 gutQ                          | gutQ | 2827835 | 103  |
| TU-1580 | FWD | 2830756 | 2831056 | 300 MU-1013                  | 2830462 norV;norW;C0664               | norV | 2830498 | 36   |
| TU-1581 | FWD | 2835331 | 2835456 | 125 MU-1014                  | 2835275 NT                            |      |         |      |
| TU-1582 | FWD | 2837481 | 2840481 | 3000 MU-1015                 | 2837449 ascF;ascB                     | ascF | 2837546 | 97   |
| TU-1583 | FWD | 2848706 | 2854256 | 5550 MU-1016;MU-1017;MU-1018 | 2848861 hypA;hypB;hypC;hypD;hypE;fhIA | hypA | 2848669 | -192 |
| TU-1584 | FWD | 2850706 | 2854256 | 3550 MU-1017;MU-1018         | 2850757 hypE;fhIA                     | hypE | 2851318 | 561  |
| TU-1585 | FWD | 2852331 | 2854256 | 1925 MU-1018                 | 2852316 fhIA                          | fhIA | 2852360 | 44   |
| TU-1586 | FWD | 2852331 | 2854256 | 1925 MU-1018                 | 2852323 fhIA                          | fhIA | 2852360 | 37   |
| TU-1587 | FWD | 2855081 | 2857731 | 2650 MU-1019                 | 2855046 mutS                          | mutS | 2855115 | 69   |
| TU-1588 | FWD | 2855081 | 2857731 | 2650 MU-1019                 | 2855085 mutS                          | mutS | 2855115 | 30   |
| TU-1589 | FWD | 2855081 | 2857731 | 2650 MU-1019                 | 2855105 mutS                          | mutS | 2855115 | 10   |
| TU-1590 | FWD | 2855081 | 2857731 | 2650 MU-1019                 | 2855132 mutS                          | mutS | 2855115 | -17  |
| TU-1591 | FWD | 2857782 | 2858438 | 656 MU-1020                  | pphB                                  | pphB | 2857782 |      |
| TU-1592 | FWD | 2859457 | 2864407 | 4950 MU-1021                 | 2859414 ygbJ;ygbK;ygbL;ygbM;ygbN      | ygbJ | 2859452 | 38   |
| TU-1593 | FWD | 2865857 | 2865932 | 75 MU-1022                   | 2865777 NT                            |      |         |      |
| TU-1594 | FWD | 2874607 | 2875632 | 1025 MU-1023                 | 2874569 iap                           | iap  | 2874603 | 34   |
| TU-1595 | FWD | 2890253 | 2892703 | 2450 MU-1024                 | 2890212 sscR;ygcN;ygcO;ygcP           | sscR | 2890236 | 24   |

|         |     |         |         |                      |                          |      |         |     |
|---------|-----|---------|---------|----------------------|--------------------------|------|---------|-----|
| TU-1596 | FWD | 2898614 | 2901396 | 2782 MU-1025         | yqcE;ygcE                | yqcE | 2898614 |     |
| TU-1597 | FWD | 2901938 | 2902488 | 550 MU-1026          | 2902008 NT               |      |         |     |
| TU-1598 | FWD | 2903733 | 2904605 | 872 MU-1027          | ygcG                     | ygcG | 2903733 |     |
| TU-1599 | FWD | 2912813 | 2915838 | 3025 MU-1028         | 2912910 barA             | barA | 2913079 | 169 |
| TU-1600 | FWD | 2923363 | 2924213 | 850 MU-1029          | 2923341 queF             | queF | 2923370 | 29  |
| TU-1601 | FWD | 2924263 | 2925688 | 1425 MU-1030         | 2924294 ygdH             | ygdH | 2924330 | 36  |
| TU-1602 | FWD | 2926165 | 2929815 | 3650 MU-1031         | 2926172 sdaC;sdaB;ygdG   | sdaC | 2926251 | 79  |
| TU-1603 | FWD | 2926165 | 2929815 | 3650 MU-1031         | 2926178 sdaC;sdaB;ygdG   | sdaC | 2926251 | 73  |
| TU-1604 | FWD | 2926165 | 2929815 | 3650 MU-1031         | 2926223 sdaC;sdaB;ygdG   | sdaC | 2926251 | 28  |
| TU-1605 | FWD | 2932257 | 2936908 | 4651 MU-1032         | fucP;fucI;fucK           | fucP | 2932257 |     |
| TU-1606 | FWD | 2936515 | 2938123 | 1608 MU-1033         | 2936466 fucU;fucR        | fucU | 2936910 | 444 |
| TU-1607 | FWD | 2936515 | 2938123 | 1608 MU-1033         | 2936671 fucU;fucR        | fucU | 2936910 | 239 |
| TU-1608 | FWD | 2940748 | 2940848 | 100 MU-1034          | 2940718 gcvB             | gcvB | 2940718 | 0   |
| TU-1609 | FWD | 2941348 | 2942998 | 1650 MU-1035;MU-1036 | 2941341 csdA;csdE        | csdA | 2941359 | 18  |
| TU-1610 | FWD | 2942373 | 2942998 | 625 MU-1036          | 2942505 csdE             | csdE | 2942564 | 59  |
| TU-1611 | FWD | 2943923 | 2944023 | 100 MU-1037          | NT                       |      |         |     |
| TU-1612 | FWD | 2945423 | 2945498 | 75 MU-1038           | 2945409 metZ;metW;metV   | metZ | 2945409 | 0   |
| TU-1613 | FWD | 2947223 | 2949273 | 2050 MU-1039         | 2947233 argA             | argA | 2947264 | 31  |
| TU-1614 | FWD | 2947223 | 2949273 | 2050 MU-1039         | 2947241 argA             | argA | 2947264 | 23  |
| TU-1615 | FWD | 2967600 | 2968275 | 675 MU-1040          | 2967638 mutH             | mutH | 2967684 | 46  |
| TU-1616 | FWD | 2968450 | 2968925 | 475 MU-1041          | 2968416 ygdQ             | ygdQ | 2968442 | 26  |
| TU-1617 | FWD | 2969300 | 2969500 | 200 MU-1042          | 2969260 ygdR             | ygdR | 2969293 | 33  |
| TU-1618 | FWD | 2969300 | 2969500 | 200 MU-1042          | 2969272 ygdR             | ygdR | 2969293 | 21  |
| TU-1619 | FWD | 2969575 | 2970778 | 1203 MU-1043         | 2969587 tas              | tas  | 2969619 | 32  |
| TU-1620 | FWD | 2974578 | 2975778 | 1200 MU-1044         | 2974591 galR             | galR | 2974621 | 30  |
| TU-1621 | FWD | 2977028 | 2977903 | 875 MU-1045          | 2976932 lysR             | lysR | 2977043 | 111 |
| TU-1622 | FWD | 2980503 | 2980778 | 275 MU-1046          | 2980467 NT               |      |         |     |
| TU-1623 | FWD | 2981553 | 2981853 | 300 MU-1047          | NT                       |      |         |     |
| TU-1624 | FWD | 2983869 | 2985098 | 1229 MU-1048         | 2983673 yqeG             | yqeG | 2983869 | 196 |
| TU-1625 | FWD | 2985558 | 2986190 | 632 MU-1049          | 2985533 yqeH             | yqeH | 2985558 | 25  |
| TU-1626 | FWD | 2986524 | 2987808 | 1284 MU-1050         | yqeI;yqeJ                | yqeI | 2986524 |     |
| TU-1627 | FWD | 2988576 | 2989065 | 489 MU-1051          | 2988440 ygeF             | ygeF | 2988576 | 136 |
| TU-1628 | FWD | 2989290 | 2989781 | 491 MU-1052          | ygeG                     | ygeG | 2989290 |     |
| TU-1629 | FWD | 2990116 | 2991492 | 1376 MU-1053         | 2990004 ygeH             | ygeH | 2990116 | 112 |
| TU-1630 | FWD | 2991660 | 2991878 | 218 MU-1054          | 2991615 ygeI             | ygeI | 2991660 | 45  |
| TU-1631 | FWD | 2991961 | 2992463 | 502 MU-1055          | pbl                      | pbl  | 2991961 |     |
| TU-1632 | FWD | 2994300 | 2994625 | 325 MU-1056          | NT                       |      |         |     |
| TU-1633 | FWD | 2998425 | 3002100 | 3675 MU-1057         | 2998296 xdhA;xdhB;xdhC   | xdhA | 2998367 | 71  |
| TU-1634 | FWD | 3005554 | 3010179 | 4625 MU-1058         | ygeW;ygeX;ygeY;hyuA;yqeA | ygeW | 3004284 |     |
| TU-1635 | FWD | 3013129 | 3013954 | 825 MU-1059          | 3013125 ygfJ             | ygfJ | 3013182 | 57  |
| TU-1636 | FWD | 3016154 | 3021804 | 5650 MU-1060         | ygfK;ssnA;ygfM;xdhD      | ygfK | 3014082 |     |
| TU-1637 | FWD | 3022373 | 3023773 | 1400 MU-1061         | ygfO                     | ygfO | 3022373 |     |
| TU-1638 | FWD | 3023729 | 3026502 | 2773 MU-1062         | 3023691 guaD;ygfQ        | guaD | 3023788 | 97  |
| TU-1639 | FWD | 3029389 | 3030837 | 1448 MU-1063         | ygfU                     | ygfU | 3029389 |     |
| TU-1640 | FWD | 3031077 | 3031727 | 650 MU-1064          | 3031063 idi              | idi  | 3031087 | 24  |
| TU-1641 | FWD | 3031077 | 3031727 | 650 MU-1064          | 3031071 idi              | idi  | 3031087 | 16  |

|         |     |         |         |                      |                                  |       |         |     |
|---------|-----|---------|---------|----------------------|----------------------------------|-------|---------|-----|
| TU-1642 | FWD | 3037877 | 3038377 | 500 MU-1065          | 3037844 fldB                     | fldB  | 3037877 | 33  |
| TU-1643 | FWD | 3039327 | 3040677 | 1350 MU-1066         | 3039304 ygfZ                     | ygfZ  | 3039335 | 31  |
| TU-1644 | FWD | 3041627 | 3043177 | 1550 MU-1067         | 3041661 bglA                     | bglA  | 3041684 | 23  |
| TU-1645 | FWD | 3041627 | 3043177 | 1550 MU-1067         | 3041716 bglA                     | bglA  | 3041684 | -32 |
| TU-1646 | FWD | 3053527 | 3053777 | 250 MU-1068          | 3053511 zapA                     | zapA  | 3053634 | 123 |
| TU-1647 | FWD | 3053802 | 3054627 | 825 MU-1069          | 3053781 ssrS;ygfA                | ssrS  | 3054005 | 224 |
| TU-1648 | FWD | 3053802 | 3054627 | 825 MU-1069          | 3053790 ssrS;ygfA                | ssrS  | 3054005 | 215 |
| TU-1649 | FWD | 3053802 | 3054627 | 825 MU-1069          | 3053880 ssrS;ygfA                | ssrS  | 3054005 | 125 |
| TU-1650 | FWD | 3053802 | 3054627 | 825 MU-1069          | 3053996 ssrS;ygfA                | ssrS  | 3054005 | 9   |
| TU-1651 | FWD | 3054902 | 3055152 | 250 MU-1070          | 3054873 rygC                     | rygC  | 3054871 | -2  |
| TU-1652 | FWD | 3057777 | 3058503 | 726 MU-1071          | 3057743 argP                     | argP  | 3057775 | 32  |
| TU-1653 | FWD | 3057777 | 3058503 | 726 MU-1071          | 3057751 argP                     | argP  | 3057775 | 24  |
| TU-1654 | FWD | 3058872 | 3064302 | 5430 MU-1072         | scpA;argK;scpB;scpC              | scpA  | 3058872 |     |
| TU-1655 | FWD | 3065058 | 3065533 | 475 MU-1073          | 3065229 NT                       |       |         |     |
| TU-1656 | FWD | 3079721 | 3080771 | 1050 MU-1074         | 3079905 yggG                     | yggG  | 3079935 | 30  |
| TU-1657 | FWD | 3084209 | 3084424 | 215 MU-1075          | yqqC                             | yqqC  | 3084209 |     |
| TU-1658 | FWD | 3084624 | 3085874 | 1250 MU-1076         | 3084589 metK                     | metK  | 3084728 | 139 |
| TU-1659 | FWD | 3084624 | 3085874 | 1250 MU-1076         | 3084613 metK                     | metK  | 3084728 | 115 |
| TU-1660 | FWD | 3084624 | 3085874 | 1250 MU-1076         | 3084691 metK                     | metK  | 3084728 | 37  |
| TU-1661 | FWD | 3084624 | 3085874 | 1250 MU-1076         | 3084705 metK                     | metK  | 3084728 | 23  |
| TU-1662 | FWD | 3084624 | 3085874 | 1250 MU-1076         | 3084711 metK                     | metK  | 3084728 | 17  |
| TU-1663 | FWD | 3086249 | 3088974 | 2725 MU-1077         | 3086277 galP;yggI;endA           | galP  | 3086306 | 29  |
| TU-1664 | FWD | 3089124 | 3091049 | 1925 MU-1078         | 3089091 rsmE;gshB                | rsmE  | 3089156 | 65  |
| TU-1665 | FWD | 3089124 | 3091049 | 1925 MU-1078         | 3089097 rsmE;gshB                | rsmE  | 3089156 | 59  |
| TU-1666 | FWD | 3091074 | 3092024 | 950 MU-1079          | 3090922 yqqE;yqqF                | yqqE  | 3090959 | 37  |
| TU-1667 | FWD | 3091074 | 3092024 | 950 MU-1079          | 3090929 yqqE;yqqF                | yqqE  | 3090959 | 30  |
| TU-1668 | FWD | 3093124 | 3096449 | 3325 MU-1080;MU-1081 | 3093082 yggS;yggT;yggU;rdgB;yggW | yggS  | 3093120 | 38  |
| TU-1669 | FWD | 3094624 | 3096449 | 1825 MU-1081         | 3094639 rdgB;yggW                | rdgB  | 3094703 | 64  |
| TU-1670 | FWD | 3094624 | 3096449 | 1825 MU-1081         | 3094645 rdgB;yggW                | rdgB  | 3094703 | 58  |
| TU-1671 | FWD | 3096574 | 3096599 | 25 MU-1082           | 3096582 NT                       |       |         |     |
| TU-1672 | FWD | 3098699 | 3098874 | 175 MU-1083          | NT                               |       |         |     |
| TU-1673 | FWD | 3101024 | 3102049 | 1025 MU-1084         | 3101011 mutY                     | mutY  | 3101035 | 24  |
| TU-1674 | FWD | 3101024 | 3102049 | 1025 MU-1084         | 3101024 mutY                     | mutY  | 3101035 | 11  |
| TU-1675 | FWD | 3102074 | 3103524 | 1450 MU-1085         | 3102014 yggX;mltC                | yggX  | 3102115 | 101 |
| TU-1676 | FWD | 3102074 | 3103524 | 1450 MU-1085         | 3102064 yggX;mltC                | yggX  | 3102115 | 51  |
| TU-1677 | FWD | 3103699 | 3104624 | 925 MU-1086          | 3103673 nupG                     | nupG  | 3103736 | 63  |
| TU-1678 | FWD | 3107238 | 3108288 | 1050 MU-1087         | 3107546 yqqA                     | yqqA  | 3107575 | 29  |
| TU-1679 | FWD | 3108413 | 3108463 | 50 MU-1088           | 3108436 pheV                     | pheV  | 3108388 | -48 |
| TU-1680 | FWD | 3109263 | 3109588 | 325 MU-1089          | 3109328 NT                       |       |         |     |
| TU-1681 | FWD | 3119263 | 3119613 | 350 MU-1090          | 3119402 C0719                    | C0719 | 3119380 | -22 |
| TU-1682 | FWD | 3126238 | 3127213 | 975 MU-1091          | 3126227 glcC                     | glcC  | 3126294 | 67  |
| TU-1683 | FWD | 3128163 | 3129238 | 1075 MU-1092         | 3128104 insH                     | insH  | 3128200 | 96  |
| TU-1684 | FWD | 3132153 | 3132845 | 692 MU-1093          | yghT                             | yghT  | 3132153 |     |
| TU-1685 | FWD | 3136738 | 3137738 | 1000 MU-1094         | 3136722 yghU                     | yghU  | 3136749 | 27  |
| TU-1686 | FWD | 3145913 | 3147038 | 1125 MU-1095         | 3145884 yghZ                     | yghZ  | 3145919 | 35  |
| TU-1687 | FWD | 3147688 | 3148563 | 875 MU-1096          | 3147658 yghA                     | yghA  | 3147684 | 26  |

|         |     |         |         |                      |                   |      |         |      |
|---------|-----|---------|---------|----------------------|-------------------|------|---------|------|
| TU-1688 | FWD | 3150188 | 3151463 | 1275 MU-1097         | 3150232 metC      | metC | 3150258 | 26   |
| TU-1689 | FWD | 3151488 | 3152213 | 725 MU-1098          | 3151551 yghB      | yghB | 3151585 | 34   |
| TU-1690 | FWD | 3153322 | 3155522 | 2200 MU-1099;MU-1100 | 3153325 yqhD;dkgA | yqhD | 3153377 | 52   |
| TU-1691 | FWD | 3153322 | 3155522 | 2200 MU-1099;MU-1100 | 3153352 yqhD;dkgA | yqhD | 3153377 | 25   |
| TU-1692 | FWD | 3154647 | 3155522 | 875 MU-1100          | 3154594 dkgA      | dkgA | 3154645 | 51   |
| TU-1693 | FWD | 3155672 | 3156906 | 1234 MU-1101         | yqhG;yqhH         | yqhG | 3155672 |      |
| TU-1694 | FWD | 3167824 | 3169824 | 2000 MU-1102         | 3167822 qseB;qseC | qseB | 3167850 | 28   |
| TU-1695 | FWD | 3170552 | 3171152 | 600 MU-1103          | 3170526 mdaB      | mdaB | 3170552 | 26   |
| TU-1696 | FWD | 3171177 | 3171527 | 350 MU-1104          | 3171143 ygiN      | ygiN | 3171164 | 21   |
| TU-1697 | FWD | 3175102 | 3175277 | 175 MU-1105          | 3175035 NT        |      |         |      |
| TU-1698 | FWD | 3175902 | 3177702 | 1800 MU-1106         | 3175888 tolC      | tolC | 3176137 | 249  |
| TU-1699 | FWD | 3175902 | 3177702 | 1800 MU-1106         | 3176023 tolC      | tolC | 3176137 | 114  |
| TU-1700 | FWD | 3175902 | 3177702 | 1800 MU-1106         | 3176097 tolC      | tolC | 3176137 | 40   |
| TU-1701 | FWD | 3177752 | 3179652 | 1900 MU-1107;MU-1108 | 3177739 ygiB;ygiC | ygiB | 3177766 | 27   |
| TU-1702 | FWD | 3178877 | 3179652 | 775 MU-1108          | 3178779 ygiC      | ygiC | 3178443 | -336 |
| TU-1703 | FWD | 3178877 | 3179652 | 775 MU-1108          | 3178893 ygiC      | ygiC | 3178443 | -450 |
| TU-1704 | FWD | 3178877 | 3179652 | 775 MU-1108          | 3178902 ygiC      | ygiC | 3178443 | -459 |
| TU-1705 | FWD | 3180477 | 3181327 | 850 MU-1109          | 3180445 zupT      | zupT | 3180572 | 127  |
| TU-1706 | FWD | 3180477 | 3181327 | 850 MU-1109          | 3180472 zupT      | zupT | 3180572 | 100  |
| TU-1707 | FWD | 3182852 | 3183127 | 275 MU-1110          | 3182820 yqiC      | yqiC | 3182862 | 42   |
| TU-1708 | FWD | 3182852 | 3183127 | 275 MU-1110          | 3182835 yqiC      | yqiC | 3182862 | 27   |
| TU-1709 | FWD | 3183436 | 3183987 | 551 MU-1111          | ygiL              | ygiL | 3183436 |      |
| TU-1710 | FWD | 3184083 | 3184111 | 28 MU-1112           | yqiG              | yqiG | 3184083 |      |
| TU-1711 | FWD | 3184127 | 3185552 | 1425 MU-1113         | 3184102 insC;insD | insC | 3184209 | 107  |
| TU-1712 | FWD | 3184083 | 3189718 | 5635 MU-1114         | yqiG;yqiH;yqiI    | yqiG | 3185443 |      |
| TU-1713 | FWD | 3190230 | 3192547 | 2317 MU-1115         | yqiJ;yqiK         | yqiJ | 3190230 |      |
| TU-1714 | FWD | 3199102 | 3201402 | 2300 MU-1116;MU-1117 | 3199068 htrG;cca  | htrG | 3199229 | 161  |
| TU-1715 | FWD | 3199102 | 3201402 | 2300 MU-1116;MU-1117 | 3199114 htrG;cca  | htrG | 3199229 | 115  |
| TU-1716 | FWD | 3199102 | 3201402 | 2300 MU-1116;MU-1117 | 3199202 htrG;cca  | htrG | 3199229 | 27   |
| TU-1717 | FWD | 3199852 | 3201402 | 1550 MU-1117         | 3199811 cca       | cca  | 3199913 | 102  |
| TU-1718 | FWD | 3199852 | 3201402 | 1550 MU-1117         | 3199885 cca       | cca  | 3199913 | 28   |
| TU-1719 | FWD | 3199852 | 3201402 | 1550 MU-1117         | 3199888 cca       | cca  | 3199913 | 25   |
| TU-1720 | FWD | 3199852 | 3201402 | 1550 MU-1117         | 3199920 cca       | cca  | 3199913 | -7   |
| TU-1721 | FWD | 3202627 | 3203352 | 725 MU-1118          | 3202677 ygiH      | ygiH | 3202716 | 39   |
| TU-1722 | FWD | 3204485 | 3207509 | 3024 MU-1119         | ttdA;ttdB;ttdT    | ttdA | 3204485 |      |
| TU-1723 | FWD | 3208702 | 3210627 | 1925 MU-1120         | 3208669 rpsU;dnaG | rpsU | 3208803 | 134  |
| TU-1724 | FWD | 3208702 | 3210627 | 1925 MU-1120         | 3208738 rpsU;dnaG | rpsU | 3208803 | 65   |
| TU-1725 | FWD | 3208702 | 3210627 | 1925 MU-1120         | 3208740 rpsU;dnaG | rpsU | 3208803 | 63   |
| TU-1726 | FWD | 3208702 | 3210627 | 1925 MU-1120         | 3208743 rpsU;dnaG | rpsU | 3208803 | 60   |
| TU-1727 | FWD | 3208702 | 3210627 | 1925 MU-1120         | 3208781 rpsU;dnaG | rpsU | 3208803 | 22   |
| TU-1728 | FWD | 3210652 | 3212952 | 2300 MU-1121         | 3210489 rpoD      | rpoD | 3211069 | 580  |
| TU-1729 | FWD | 3210652 | 3212952 | 2300 MU-1121         | 3210710 rpoD      | rpoD | 3211069 | 359  |
| TU-1730 | FWD | 3210652 | 3212952 | 2300 MU-1121         | 3210752 rpoD      | rpoD | 3211069 | 317  |
| TU-1731 | FWD | 3210652 | 3212952 | 2300 MU-1121         | 3210963 rpoD      | rpoD | 3211069 | 106  |
| TU-1732 | FWD | 3213652 | 3213677 | 25 MU-1122           | 3213668 ileX      | ileX | 3213620 | -48  |
| TU-1733 | FWD | 3214752 | 3215552 | 800 MU-1123          | 3214775 yqiI      | yqiI | 3214801 | 26   |

|         |     |         |         |                              |                                       |      |         |      |
|---------|-----|---------|---------|------------------------------|---------------------------------------|------|---------|------|
| TU-1734 | FWD | 3217502 | 3219052 | 1550 MU-1124                 | 3217481 ygjG                          | ygjG | 3217516 | 35   |
| TU-1735 | FWD | 3219428 | 3220353 | 925 MU-1125                  | 3219417 ebgR                          | ebgR | 3219488 | 71   |
| TU-1736 | FWD | 3220655 | 3224193 | 3538 MU-1126                 | ebgA;ebgC                             | ebgA | 3220655 |      |
| TU-1737 | FWD | 3224256 | 3225689 | 1433 MU-1127                 | ygjI                                  | ygjI | 3224256 |      |
| TU-1738 | FWD | 3225823 | 3229261 | 3438 MU-1128                 | ygjJ;ygjK                             | ygjJ | 3225823 |      |
| TU-1739 | FWD | 3229703 | 3231653 | 1950 MU-1129                 | 3229646 fadH                          | fadH | 3229687 | 41   |
| TU-1740 | FWD | 3233953 | 3234428 | 475 MU-1130                  | 3233959 ygjP;ygjQ                     | ygjP | 3233982 | 23   |
| TU-1741 | FWD | 3235328 | 3236328 | 1000 MU-1131                 | 3235304 ygjR                          | ygjR | 3235333 | 29   |
| TU-1742 | FWD | 3236378 | 3236553 | 175 MU-1132                  | 3236497 psrN                          | psrN | 3236396 | -101 |
| TU-1743 | FWD | 3236602 | 3237567 | 965 MU-1133                  | alx                                   | alx  | 3236602 |      |
| TU-1744 | FWD | 3237903 | 3239128 | 1225 MU-1134                 | 3237885 sstT                          | sstT | 3237966 | 81   |
| TU-1745 | FWD | 3243198 | 3244523 | 1325 MU-1135                 | 3243045 exuT                          | exuT | 3243126 | 81   |
| TU-1746 | FWD | 3244648 | 3245423 | 775 MU-1136                  | 3244646 exuR                          | exuR | 3244674 | 28   |
| TU-1747 | FWD | 3244648 | 3245423 | 775 MU-1136                  | 3244656 exuR                          | exuR | 3244674 | 18   |
| TU-1748 | FWD | 3245523 | 3246823 | 1300 MU-1137                 | 3245573 yqjA;yqjB                     | yqjA | 3245795 | 222  |
| TU-1749 | FWD | 3245523 | 3246823 | 1300 MU-1137                 | 3245627 yqjA;yqjB                     | yqjA | 3245795 | 168  |
| TU-1750 | FWD | 3245523 | 3246823 | 1300 MU-1137                 | 3245652 yqjA;yqjB                     | yqjA | 3245795 | 143  |
| TU-1751 | FWD | 3245523 | 3246823 | 1300 MU-1137                 | 3245667 yqjA;yqjB                     | yqjA | 3245795 | 128  |
| TU-1752 | FWD | 3246873 | 3248398 | 1525 MU-1138                 | 3246991 yqjC;yqjD;yqjE;yqjK           | yqjC | 3246991 | 0    |
| TU-1753 | FWD | 3248448 | 3248923 | 475 MU-1139                  | 3248592 yqjF                          | yqjF | 3248584 | -8   |
| TU-1754 | FWD | 3249048 | 3250073 | 1025 MU-1140                 | 3249186 yqjG                          | yqjG | 3249046 | -140 |
| TU-1755 | FWD | 3250223 | 3250723 | 500 MU-1141                  | 3250285 yhaH                          | yhaH | 3250326 | 41   |
| TU-1756 | FWD | 3250933 | 3251289 | 356 MU-1142                  | yhaI                                  | yhaI | 3250933 |      |
| TU-1757 | FWD | 3252349 | 3252524 | 175 MU-1143                  | 3252319 yhaK                          | yhaK | 3252341 | 22   |
| TU-1758 | FWD | 3253049 | 3253324 | 275 MU-1144                  | 3253037 yhaL                          | yhaL | 3253065 | 28   |
| TU-1759 | FWD | 3253049 | 3253324 | 275 MU-1144                  | 3253039 yhaL                          | yhaL | 3253065 | 26   |
| TU-1760 | FWD | 3265402 | 3265620 | 218 MU-1145                  | tdcR                                  | tdcR | 3265402 |      |
| TU-1761 | FWD | 3265876 | 3267624 | 1748 MU-1146                 | yhaB;yhaC                             | yhaB | 3265876 |      |
| TU-1762 | FWD | 3267751 | 3268195 | 444 MU-1147                  | 3267552 NT                            |      |         |      |
| TU-1763 | FWD | 3273295 | 3274845 | 1550 MU-1148                 | 3273229 garD                          | garD | 3273304 | 75   |
| TU-1764 | FWD | 3273295 | 3274845 | 1550 MU-1148                 | 3273257 garD                          | garD | 3273304 | 47   |
| TU-1765 | FWD | 3273295 | 3274845 | 1550 MU-1148                 | 3273271 garD                          | garD | 3273304 | 33   |
| TU-1766 | FWD | 3274995 | 3275820 | 825 MU-1149                  | 3274994 sohA;yhaV                     | sohA | 3275024 | 30   |
| TU-1767 | FWD | 3276936 | 3282025 | 5089 MU-1150                 | 3276888 kbaZ;agaV;agaW;agaA;agaS;kbaY | kbaZ | 3276936 | 48   |
| TU-1768 | FWD | 3282192 | 3285047 | 2855 MU-1151                 | 3281839 agaB;agaC;agaD;agaI           | agaB | 3282192 | 353  |
| TU-1769 | FWD | 3285448 | 3290454 | 5006 MU-1152                 | 3285425 yraH;yraI;yraJ;yraK           | yraH | 3285448 | 23   |
| TU-1770 | FWD | 3291421 | 3295171 | 3750 MU-1153;MU-1154;MU-1155 | 3291391 yraM;yraN;diaA;yraP           | yraM | 3291422 | 31   |
| TU-1771 | FWD | 3293846 | 3295171 | 1325 MU-1154;MU-1155         | 3293818 diaA;yraP                     | diaA | 3293831 | 13   |
| TU-1772 | FWD | 3294596 | 3295171 | 575 MU-1155                  | 3294399 yraP                          | yraP | 3294431 | 32   |
| TU-1773 | FWD | 3296971 | 3297521 | 550 MU-1156                  | 3296930 yhbO                          | yhbO | 3296996 | 66   |
| TU-1774 | FWD | 3297996 | 3298221 | 225 MU-1157                  | 3297963 yhbQ                          | yhbQ | 3297988 | 25   |
| TU-1775 | FWD | 3299271 | 3301096 | 1825 MU-1158                 | 3299461 yhbU;yhbV                     | yhbU | 3299507 | 46   |
| TU-1776 | FWD | 3301471 | 3302796 | 1325 MU-1159                 | 3301434 yhbW                          | yhbW | 3301470 | 36   |
| TU-1777 | FWD | 3301471 | 3302796 | 1325 MU-1159                 | 3301444 yhbW                          | yhbW | 3301470 | 26   |
| TU-1778 | FWD | 3309247 | 3309420 | 173 MU-1160                  | psrO                                  | psrO | 3309247 |      |
| TU-1779 | FWD | 3316521 | 3317946 | 1425 MU-1161                 | 3316582 argG                          | argG | 3316659 | 77   |

|         |     |         |         |                      |                                |      |         |      |
|---------|-----|---------|---------|----------------------|--------------------------------|------|---------|------|
| TU-1780 | FWD | 3316521 | 3317946 | 1425 MU-1161         | 3316589 argG                   | argG | 3316659 | 70   |
| TU-1781 | FWD | 3316521 | 3317946 | 1425 MU-1161         | 3316601 argG                   | argG | 3316659 | 58   |
| TU-1782 | FWD | 3316521 | 3317946 | 1425 MU-1161         | 3316636 argG                   | argG | 3316659 | 23   |
| TU-1783 | FWD | 3325796 | 3326171 | 375 MU-1162          | 3325781 yhbY                   | yhbY | 3325812 | 31   |
| TU-1784 | FWD | 3326971 | 3328521 | 1550 MU-1163         | 3326958 dacB                   | dacB | 3326985 | 27   |
| TU-1785 | FWD | 3331546 | 3333096 | 1550 MU-1164         | 3331658 ispB;sfsB              | ispB | 3331732 | 74   |
| TU-1786 | FWD | 3331546 | 3333096 | 1550 MU-1164         | 3331724 ispB;sfsB              | ispB | 3331732 | 8    |
| TU-1787 | FWD | 3331546 | 3333096 | 1550 MU-1164         | 3331736 ispB;sfsB              | ispB | 3331732 | -4   |
| TU-1788 | FWD | 3338272 | 3340272 | 2000 MU-1165         | 3338233 yrbG;kdsD              | yrbG | 3338297 | 64   |
| TU-1789 | FWD | 3338272 | 3340272 | 2000 MU-1165         | 3338256 yrbG;kdsD              | yrbG | 3338297 | 41   |
| TU-1790 | FWD | 3340297 | 3341272 | 975 MU-1166          | 3340285 kdsC;yrbK              | kdsC | 3340295 | 10   |
| TU-1791 | FWD | 3341297 | 3342697 | 1400 MU-1167         | 3341327 lptA;lptB              | lptA | 3341402 | 75   |
| TU-1792 | FWD | 3341297 | 3342697 | 1400 MU-1167         | 3341390 lptA;lptB              | lptA | 3341402 | 12   |
| TU-1793 | FWD | 3342722 | 3346297 | 3575 MU-1168;MU-1169 | 3342713 rpoN;hpf;ptsN;yhbJ;npr | rpoN | 3342739 | 26   |
| TU-1794 | FWD | 3344247 | 3346297 | 2050 MU-1169         | 3344129 hpf;ptsN;yhbJ;npr      | hpf  | 3344195 | 66   |
| TU-1795 | FWD | 3344247 | 3346297 | 2050 MU-1169         | 3344137 hpf;ptsN;yhbJ;npr      | hpf  | 3344195 | 58   |
| TU-1796 | FWD | 3346472 | 3347397 | 925 MU-1170          | 3346447 yrbL                   | yrbL | 3346474 | 27   |
| TU-1797 | FWD | 3348604 | 3348704 | 100 MU-1171          | 3348610 ryhA                   | ryhA | 3348599 | -11  |
| TU-1798 | FWD | 3350054 | 3350104 | 50 MU-1172           | NT                             |      |         |      |
| TU-1799 | FWD | 3352104 | 3352329 | 225 MU-1173          | 3352068 NT                     |      |         |      |
| TU-1800 | FWD | 3352554 | 3358729 | 6175 MU-1174         | 3352533 gltB;gltD              | gltB | 3352654 | 121  |
| TU-1801 | FWD | 3352554 | 3358729 | 6175 MU-1174         | 3352544 gltB;gltD              | gltB | 3352654 | 110  |
| TU-1802 | FWD | 3352554 | 3358729 | 6175 MU-1174         | 3352583 gltB;gltD              | gltB | 3352654 | 71   |
| TU-1803 | FWD | 3359204 | 3360079 | 875 MU-1175          | 3359153 gltF                   | gltF | 3359198 | 45   |
| TU-1804 | FWD | 3359204 | 3360079 | 875 MU-1175          | 3359163 gltF                   | gltF | 3359198 | 35   |
| TU-1805 | FWD | 3359204 | 3360079 | 875 MU-1175          | 3359175 gltF                   | gltF | 3359198 | 23   |
| TU-1806 | FWD | 3360134 | 3363573 | 3439 MU-1176         | yhcA;yhcD;yhcE                 | yhcA | 3360134 |      |
| TU-1807 | FWD | 3361129 | 3363029 | 1900 MU-1177         | 3360933 yhcD;yhcE              | yhcD | 3360829 | -104 |
| TU-1808 | FWD | 3361129 | 3363029 | 1900 MU-1177         | 3360973 yhcD;yhcE              | yhcD | 3360829 | -144 |
| TU-1809 | FWD | 3363207 | 3363573 | 366 MU-1178          | yhcE                           | yhcE | 3363207 |      |
| TU-1810 | FWD | 3365004 | 3365879 | 875 MU-1179          | 3364969 yhcF                   | yhcF | 3364948 | -21  |
| TU-1811 | FWD | 3365004 | 3365879 | 875 MU-1179          | 3364973 yhcF                   | yhcF | 3364948 | -25  |
| TU-1812 | FWD | 3365849 | 3366976 | 1127 MU-1180         | yhcG                           | yhcG | 3365849 |      |
| TU-1813 | FWD | 3372891 | 3374258 | 1367 MU-1181         | dcuD                           | dcuD | 3372891 |      |
| TU-1814 | FWD | 3378059 | 3378584 | 525 MU-1182          | 3378148 yhcB                   | yhcB | 3378213 | 65   |
| TU-1815 | FWD | 3378059 | 3378584 | 525 MU-1182          | 3378182 yhcB                   | yhcB | 3378213 | 31   |
| TU-1816 | FWD | 3378709 | 3380084 | 1375 MU-1183         | 3378675 degQ                   | degQ | 3378765 | 90   |
| TU-1817 | FWD | 3378709 | 3380084 | 1375 MU-1183         | 3378729 degQ                   | degQ | 3378765 | 36   |
| TU-1818 | FWD | 3380184 | 3381284 | 1100 MU-1184         | 3380203 degS                   | degS | 3380222 | 19   |
| TU-1819 | FWD | 3382684 | 3383184 | 500 MU-1185          | 3382622 argR                   | argR | 3382725 | 103  |
| TU-1820 | FWD | 3382684 | 3383184 | 500 MU-1185          | 3382699 argR                   | argR | 3382725 | 26   |
| TU-1821 | FWD | 3383528 | 3383803 | 275 MU-1186          | 3383540 yhcN                   | yhcN | 3383560 | 20   |
| TU-1822 | FWD | 3386978 | 3387503 | 525 MU-1187          | 3386963 NT                     |      |         |      |
| TU-1823 | FWD | 3387553 | 3388428 | 875 MU-1188          | 3387502 aaeR                   | aaeR | 3387542 | 40   |
| TU-1824 | FWD | 3391028 | 3391128 | 100 MU-1189          | 3390911 NT                     |      |         |      |
| TU-1825 | FWD | 3392528 | 3392628 | 100 MU-1190          | 3392539 NT                     |      |         |      |



|         |     |         |         |                      |                                                                     |      |         |      |
|---------|-----|---------|---------|----------------------|---------------------------------------------------------------------|------|---------|------|
| TU-1826 | FWD | 3395878 | 3395928 | 50 MU-1191           | 3395856 NT                                                          |      |         |      |
| TU-1827 | FWD | 3400628 | 3401353 | 725 MU-1192          | 3400640 NT                                                          |      |         |      |
| TU-1828 | FWD | 3401378 | 3402578 | 1200 MU-1193         | 3401252 yhdH                                                        | yhdH | 3401506 | 254  |
| TU-1829 | FWD | 3401378 | 3402578 | 1200 MU-1193         | 3401401 yhdH                                                        | yhdH | 3401506 | 105  |
| TU-1830 | FWD | 3401378 | 3402578 | 1200 MU-1193         | 3401475 yhdH                                                        | yhdH | 3401506 | 31   |
| TU-1831 | FWD | 3402628 | 3403078 | 450 MU-1194          | 3402769 yrdE                                                        | yrdE | 3402666 | -103 |
| TU-1832 | FWD | 3402628 | 3403078 | 450 MU-1194          | 3402779 yrdE                                                        | yrdE | 3402666 | -113 |
| TU-1833 | FWD | 3403328 | 3405278 | 1950 MU-1195         | 3403396 accB;accC                                                   | accB | 3403458 | 62   |
| TU-1834 | FWD | 3403328 | 3405278 | 1950 MU-1195         | 3403474 accB;accC                                                   | accB | 3403458 | -16  |
| TU-1835 | FWD | 3405406 | 3408006 | 2600 MU-1196;MU-1197 | 3405208 yhdT;panF;prmA                                              | yhdT | 3405397 | 189  |
| TU-1836 | FWD | 3405406 | 3408006 | 2600 MU-1196;MU-1197 | 3405256 yhdT;panF;prmA                                              | yhdT | 3405397 | 141  |
| TU-1837 | FWD | 3406831 | 3408006 | 1175 MU-1197         | 3407005 prmA                                                        | prmA | 3407092 | 87   |
| TU-1838 | FWD | 3406831 | 3408006 | 1175 MU-1197         | 3407062 prmA                                                        | prmA | 3407092 | 30   |
| TU-1839 | FWD | 3408206 | 3409606 | 1400 MU-1198         | 3408270 dusB;fis                                                    | dusB | 3408302 | 32   |
| TU-1840 | FWD | 3409675 | 3410756 | 1081 MU-1199;MU-1200 | yhdJ;yhdU                                                           | yhdJ | 3409675 |      |
| TU-1841 | FWD | 3410656 | 3410756 | 100 MU-1200          | 3410612 yhdU                                                        | yhdU | 3410643 | 31   |
| TU-1842 | FWD | 3411886 | 3416159 | 4273 MU-1201         | 3411816 acrE;acrF                                                   | acrE | 3411886 | 70   |
| TU-1843 | FWD | 3416357 | 3416557 | 200 MU-1202          | 3416353 yhdV                                                        | yhdV | 3416412 | 59   |
| TU-1844 | FWD | 3416982 | 3421182 | 4200 MU-1203         | 3417074 yhdW;yhdX;yhdY;yhdZ                                         | yhdW | 3417064 | -10  |
| TU-1845 | FWD | 3427232 | 3428007 | 775 MU-1204          | 3427233 yrdA                                                        | yrdA | 3427258 | 25   |
| TU-1846 | FWD | 3431707 | 3435882 | 4175 MU-1205         | 3431672 def;fmt;rsmB;trkA                                           | def  | 3431712 | 40   |
| TU-1847 | FWD | 3431707 | 3435882 | 4175 MU-1205         | 3431680 def;fmt;rsmB;trkA                                           | def  | 3431712 | 32   |
| TU-1848 | FWD | 3436032 | 3436457 | 425 MU-1206          | 3435866 mscL                                                        | mscL | 3436046 | 180  |
| TU-1849 | FWD | 3436032 | 3436457 | 425 MU-1206          | 3436063 mscL                                                        | mscL | 3436046 | -17  |
| TU-1850 | FWD | 3453572 | 3463997 | 10425 MU-1207        | 3453562 gspC;gspD;gspE;gspF;gspG;gspH;gspI;gspJ;gspK;gspL;gspM;gspO | gspC | 3453600 | 38   |
| TU-1851 | FWD | 3453572 | 3463997 | 10425 MU-1207        | 3453580 gspC;gspD;gspE;gspF;gspG;gspH;gspI;gspJ;gspK;gspL;gspM;gspO | gspC | 3453600 | 20   |
| TU-1852 | FWD | 3475524 | 3475874 | 350 MU-1208          | 3475637 slyX                                                        | slyX | 3475662 | 25   |
| TU-1853 | FWD | 3476499 | 3476699 | 200 MU-1209          | 3476465 NT                                                          |      |         |      |
| TU-1854 | FWD | 3479149 | 3483324 | 4175 MU-1210;MU-1211 | 3479280 yheS;yheT;yheU;prkB                                         | yheS | 3479311 | 31   |
| TU-1855 | FWD | 3482024 | 3483324 | 1300 MU-1211         | 3482202 yheU;prkB                                                   | yheU | 3482240 | 38   |
| TU-1856 | FWD | 3483999 | 3486924 | 2925 MU-1212         | 3483975 crp;yhfK                                                    | crp  | 3484142 | 167  |
| TU-1857 | FWD | 3483999 | 3486924 | 2925 MU-1212         | 3483987 crp;yhfK                                                    | crp  | 3484142 | 155  |
| TU-1858 | FWD | 3483999 | 3486924 | 2925 MU-1212         | 3483071 crp;yhfK                                                    | crp  | 3484142 | 1071 |
| TU-1859 | FWD | 3483999 | 3486924 | 2925 MU-1212         | 3484074 crp;yhfK                                                    | crp  | 3484142 | 68   |
| TU-1860 | FWD | 3483999 | 3486924 | 2925 MU-1212         | 3484120 crp;yhfK                                                    | crp  | 3484142 | 22   |
| TU-1861 | FWD | 3483999 | 3486924 | 2925 MU-1212         | 3484132 crp;yhfK                                                    | crp  | 3484142 | 10   |
| TU-1862 | FWD | 3490574 | 3491749 | 1175 MU-1213         | 3490542 tsgA                                                        | tsgA | 3490590 | 48   |
| TU-1863 | FWD | 3491899 | 3495635 | 3736 MU-1214         | 3491922 nirB;nirD;nirC                                              | nirB | 3492033 | 111  |
| TU-1864 | FWD | 3491899 | 3495635 | 3736 MU-1214         | 3492009 nirB;nirD;nirC                                              | nirB | 3492033 | 24   |
| TU-1865 | FWD | 3495735 | 3497185 | 1450 MU-1215         | 3495774 cysG                                                        | cysG | 3495850 | 76   |
| TU-1866 | FWD | 3495735 | 3497185 | 1450 MU-1215         | 3495828 cysG                                                        | cysG | 3495850 | 22   |
| TU-1867 | FWD | 3497535 | 3497610 | 75 MU-1216           | 3497436 yhfL                                                        | yhfL | 3497470 | 34   |
| TU-1868 | FWD | 3497535 | 3497610 | 75 MU-1216           | 3497478 yhfL                                                        | yhfL | 3497470 | -8   |
| TU-1869 | FWD | 3497932 | 3501974 | 4042 MU-1217         | frlA;frlB;frlC;frlD                                                 | frlA | 3497932 |      |

|         |     |         |         |                      |                        |      |         |     |
|---------|-----|---------|---------|----------------------|------------------------|------|---------|-----|
| TU-1870 | FWD | 3501985 | 3502860 | 875 MU-1218          | 3502047 frlR           | frlR | 3502074 | 27  |
| TU-1871 | FWD | 3501985 | 3502860 | 875 MU-1218          | 3502055 frlR           | frlR | 3502074 | 19  |
| TU-1872 | FWD | 3501985 | 3502860 | 875 MU-1218          | 3502099 frlR           | frlR | 3502074 | -25 |
| TU-1873 | FWD | 3506512 | 3506687 | 175 MU-1219          | NT                     |      |         |     |
| TU-1874 | FWD | 3520887 | 3523412 | 2525 MU-1220         | 3520848 mrcA           | mrcA | 3520893 | 45  |
| TU-1875 | FWD | 3524312 | 3526612 | 2300 MU-1221         | 3524344 yrfF           | yrfF | 3524491 | 147 |
| TU-1876 | FWD | 3526687 | 3528787 | 2100 MU-1222;MU-1223 | 3526662 yrfG;hslR;hslO | yrfG | 3526691 | 29  |
| TU-1877 | FWD | 3527162 | 3528787 | 1625 MU-1223         | 3527132 hslR;hslO      | hslR | 3527370 | 238 |
| TU-1878 | FWD | 3530737 | 3532463 | 1726 MU-1224         | 3530701 pck            | pck  | 3530840 | 139 |
| TU-1879 | FWD | 3530737 | 3532463 | 1726 MU-1224         | 3530813 pck            | pck  | 3530840 | 27  |
| TU-1880 | FWD | 3534488 | 3535313 | 825 MU-1225          | 3534487 greB           | greB | 3534834 | 347 |
| TU-1881 | FWD | 3534488 | 3535313 | 825 MU-1225          | 3534659 greB           | greB | 3534834 | 175 |
| TU-1882 | FWD | 3534488 | 3535313 | 825 MU-1225          | 3534688 greB           | greB | 3534834 | 146 |
| TU-1883 | FWD | 3535363 | 3537813 | 2450 MU-1226         | 3535375 yhgF           | yhgF | 3535407 | 32  |
| TU-1884 | FWD | 3535363 | 3537813 | 2450 MU-1226         | 3535376 yhgF           | yhgF | 3535407 | 31  |
| TU-1885 | FWD | 3538038 | 3540988 | 2950 MU-1227         | 3538080 feoA;feoB;feoC | feoA | 3538185 | 105 |
| TU-1886 | FWD | 3541863 | 3542263 | 400 MU-1228          | yhgA                   | yhgA | 3541189 |     |
| TU-1887 | FWD | 3542904 | 3543587 | 683 MU-1229          | 3542880 gntX           | gntX | 3542904 | 24  |
| TU-1888 | FWD | 3543213 | 3544313 | 1100 MU-1230         | 3543480 gntY           | gntY | 3543646 | 166 |
| TU-1889 | FWD | 3543213 | 3544313 | 1100 MU-1230         | 3543618 gntY           | gntY | 3543646 | 28  |
| TU-1890 | FWD | 3543213 | 3544313 | 1100 MU-1230         | 3543630 gntY           | gntY | 3543646 | 16  |
| TU-1891 | FWD | 3543213 | 3544313 | 1100 MU-1230         | 3543655 gntY           | gntY | 3543646 | -9  |
| TU-1892 | FWD | 3544488 | 3545888 | 1400 MU-1231         | 3544427 gntT           | gntT | 3544581 | 154 |
| TU-1893 | FWD | 3544488 | 3545888 | 1400 MU-1231         | 3544499 gntT           | gntT | 3544581 | 82  |
| TU-1894 | FWD | 3550788 | 3553938 | 3150 MU-1232         | 3551046 malT           | malT | 3551107 | 61  |
| TU-1895 | FWD | 3556314 | 3556564 | 250 MU-1233          | rtcR                   | rtcR | 3556290 |     |
| TU-1896 | FWD | 3559964 | 3561939 | 1975 MU-1234         | 3559931 glpD           | glpD | 3560036 | 105 |
| TU-1897 | FWD | 3559964 | 3561939 | 1975 MU-1234         | 3559948 glpD           | glpD | 3560036 | 88  |
| TU-1898 | FWD | 3559964 | 3561939 | 1975 MU-1234         | 3560002 glpD           | glpD | 3560036 | 34  |
| TU-1899 | FWD | 3559964 | 3561939 | 1975 MU-1234         | 3560011 glpD           | glpD | 3560036 | 25  |
| TU-1900 | FWD | 3572822 | 3573897 | 1075 MU-1235         | 3572952 yhgN           | yhgN | 3573094 | 142 |
| TU-1901 | FWD | 3579172 | 3579697 | 525 MU-1236          | 3579134 yhhY           | yhhY | 3579161 | 27  |
| TU-1902 | FWD | 3579886 | 3581441 | 1555 MU-1237         | yhhZ;yrhA              | yhhZ | 3579886 |     |
| TU-1903 | FWD | 3581470 | 3582195 | 725 MU-1238          | 3581412 insA;insB      | insA | 3581506 | 94  |
| TU-1904 | FWD | 3581061 | 3581441 | 380 MU-1239          | yrhA                   | yrhA | 3582219 |     |
| TU-1905 | FWD | 3582427 | 3582582 | 155 MU-1240          | yrhD                   | yrhD | 3582427 |     |
| TU-1906 | FWD | 3582670 | 3583070 | 400 MU-1241          | 3582633 yrhB           | yrhB | 3582782 | 149 |
| TU-1907 | FWD | 3584970 | 3585595 | 625 MU-1242          | 3584943 yhhA           | yhhA | 3584966 | 23  |
| TU-1908 | FWD | 3590495 | 3590595 | 100 MU-1243          | 3590459 NT             |      |         |     |
| TU-1909 | FWD | 3590495 | 3590595 | 100 MU-1243          | 3590461 NT             |      |         |     |
| TU-1910 | FWD | 3595974 | 3596474 | 500 MU-1244          | 3595981 yhhK           | yhhK | 3596007 | 26  |
| TU-1911 | FWD | 3602374 | 3603249 | 875 MU-1245          | 3602350 rsmD;yhhL      | rsmD | 3602416 | 66  |
| TU-1912 | FWD | 3602374 | 3603249 | 875 MU-1245          | 3602360 rsmD;yhhL      | rsmD | 3602416 | 56  |
| TU-1913 | FWD | 3603749 | 3606599 | 2850 MU-1246;MU-1247 | 3603759 yhhN;zntA      | yhhN | 3603774 | 15  |
| TU-1914 | FWD | 3604474 | 3606599 | 2125 MU-1247         | 3604445 zntA           | zntA | 3604474 | 29  |
| TU-1915 | FWD | 3607174 | 3607774 | 600 MU-1248          | 3607131 yhhQ           | yhhQ | 3607240 | 109 |

|         |     |         |         |                      |                          |      |         |      |
|---------|-----|---------|---------|----------------------|--------------------------|------|---------|------|
| TU-1916 | FWD | 3607174 | 3607774 | 600 MU-1248          | 3607248 yhhQ             | yhhQ | 3607240 | -8   |
| TU-1917 | FWD | 3607874 | 3608499 | 625 MU-1249          | 3607940 dcrB             | dcrB | 3607978 | 38   |
| TU-1918 | FWD | 3609899 | 3610724 | 825 MU-1250          | 3609865 yhhT             | yhhT | 3609888 | 23   |
| TU-1919 | FWD | 3610799 | 3611724 | 925 MU-1251          | 3610784 acpT             | acpT | 3610992 | 208  |
| TU-1920 | FWD | 3610799 | 3611724 | 925 MU-1251          | 3610789 acpT             | acpT | 3610992 | 203  |
| TU-1921 | FWD | 3610799 | 3611724 | 925 MU-1251          | 3610844 acpT             | acpT | 3610992 | 148  |
| TU-1922 | FWD | 3611690 | 3616605 | 4915 MU-1252         | nikA;nikB;nikC;nikD;nikE | nikA | 3611690 |      |
| TU-1923 | FWD | 3616574 | 3616824 | 250 MU-1253          | 3616560 nikR             | nikR | 3616611 | 51   |
| TU-1924 | FWD | 3616574 | 3616824 | 250 MU-1253          | 3616569 nikR             | nikR | 3616611 | 42   |
| TU-1925 | FWD | 3617224 | 3621674 | 4450 MU-1254         | 3617209 rhsB;yhhH        | rhsB | 3617215 | 6    |
| TU-1926 | FWD | 3621924 | 3623474 | 1550 MU-1255         | 3621754 yrhC;yhhI        | yrhC | 3621910 | 156  |
| TU-1927 | FWD | 3632874 | 3633549 | 675 MU-1256          | 3632765 yhiM             | yhiM | 3632822 | 57   |
| TU-1928 | FWD | 3635549 | 3637324 | 1775 MU-1257         | 3635635 pitA             | pitA | 3635665 | 30   |
| TU-1929 | FWD | 3635549 | 3637324 | 1775 MU-1257         | 3635677 pitA             | pitA | 3635665 | -12  |
| TU-1930 | FWD | 3637974 | 3638574 | 600 MU-1258          | 3638007 uspA             | uspA | 3638134 | 127  |
| TU-1931 | FWD | 3637974 | 3638574 | 600 MU-1258          | 3638021 uspA             | uspA | 3638134 | 113  |
| TU-1932 | FWD | 3637974 | 3638574 | 600 MU-1258          | 3638114 uspA             | uspA | 3638134 | 20   |
| TU-1933 | FWD | 3638899 | 3640324 | 1425 MU-1259         | 3639000 yhiP             | yhiP | 3638885 | -115 |
| TU-1934 | FWD | 3643324 | 3645774 | 2450 MU-1260;MU-1261 | 3643355 yhiR;gor         | yhiR | 3643408 | 53   |
| TU-1935 | FWD | 3644224 | 3645774 | 1550 MU-1261         | 3644298 gor              | gor  | 3644322 | 24   |
| TU-1936 | FWD | 3646124 | 3646249 | 125 MU-1262          | 3646086 NT               |      |         |      |
| TU-1937 | FWD | 3646560 | 3648035 | 1475 MU-1263         | 3646533 arsR;arsB        | arsR | 3646551 | 18   |
| TU-1938 | FWD | 3648135 | 3648810 | 675 MU-1264          | 3648138 arsC             | arsC | 3648260 | 122  |
| TU-1939 | FWD | 3648135 | 3648810 | 675 MU-1264          | 3648198 arsC             | arsC | 3648260 | 62   |
| TU-1940 | FWD | 3649314 | 3650054 | 740 MU-1265          | yhiS                     | yhiS | 3649314 |      |
| TU-1941 | FWD | 3651985 | 3652710 | 725 MU-1266          | 3651959 slp              | slp  | 3651984 | 25   |
| TU-1942 | FWD | 3652706 | 3653236 | 530 MU-1267          | dctR                     | dctR | 3652706 |      |
| TU-1943 | FWD | 3655010 | 3655585 | 575 MU-1268          | 3654983 hdeD             | hdeD | 3655018 | 35   |
| TU-1944 | FWD | 3655010 | 3655585 | 575 MU-1268          | 3654989 hdeD             | hdeD | 3655018 | 29   |
| TU-1945 | FWD | 3655010 | 3655585 | 575 MU-1268          | 3655002 hdeD             | hdeD | 3655018 | 16   |
| TU-1946 | FWD | 3655010 | 3655585 | 575 MU-1268          | 3655034 hdeD             | hdeD | 3655018 | -16  |
| TU-1947 | FWD | 3655835 | 3661460 | 5625 MU-1269;MU-1270 | 3655823 gadE;mdtE;mdtF   | gadE | 3656389 | 566  |
| TU-1948 | FWD | 3655835 | 3661460 | 5625 MU-1269;MU-1270 | 3656265 gadE;mdtE;mdtF   | gadE | 3656389 | 124  |
| TU-1949 | FWD | 3655835 | 3661460 | 5625 MU-1269;MU-1270 | 3656297 gadE;mdtE;mdtF   | gadE | 3656389 | 92   |
| TU-1950 | FWD | 3655835 | 3661460 | 5625 MU-1269;MU-1270 | 3656322 gadE;mdtE;mdtF   | gadE | 3656389 | 67   |
| TU-1951 | FWD | 3655835 | 3661460 | 5625 MU-1269;MU-1270 | 3656369 gadE;mdtE;mdtF   | gadE | 3656389 | 20   |
| TU-1952 | FWD | 3657185 | 3661460 | 4275 MU-1270         | 3656973 gadE;mdtE;mdtF   | gadE | 3656389 | -584 |
| TU-1953 | FWD | 3657185 | 3661460 | 4275 MU-1270         | 3657015 mdtE;mdtF        | mdtE | 3657255 | 240  |
| TU-1954 | FWD | 3657185 | 3661460 | 4275 MU-1270         | 3657239 mdtE;mdtF        | mdtE | 3657255 | 16   |
| TU-1955 | FWD | 3662835 | 3662935 | 100 MU-1271          | 3662887 gadY             | gadY | 3662887 | 0    |
| TU-1956 | FWD | 3664260 | 3664385 | 125 MU-1272          | 3664096 NT               |      |         |      |
| TU-1957 | FWD | 3667585 | 3668885 | 1300 MU-1273         | 3667508 treF             | treF | 3667615 | 107  |
| TU-1958 | FWD | 3667585 | 3668885 | 1300 MU-1273         | 3667569 treF             | treF | 3667615 | 46   |
| TU-1959 | FWD | 3667585 | 3668885 | 1300 MU-1273         | 3667572 treF             | treF | 3667615 | 43   |
| TU-1960 | FWD | 3668910 | 3669435 | 525 MU-1274          | 3668915 NT               |      |         |      |
| TU-1961 | FWD | 3670415 | 3671440 | 1025 MU-1275         | 3670379 yhjC             | yhjC | 3670437 | 58   |

|         |     |         |         |                      |                                                     |      |         |     |
|---------|-----|---------|---------|----------------------|-----------------------------------------------------|------|---------|-----|
| TU-1962 | FWD | 3671465 | 3672390 | 925 MU-1276          | 3671355 yhjD                                        | yhjD | 3671385 | 30  |
| TU-1963 | FWD | 3672815 | 3674340 | 1525 MU-1277         | 3672780 yhjE                                        | yhjE | 3672809 | 29  |
| TU-1964 | FWD | 3672815 | 3674340 | 1525 MU-1277         | 3672782 yhjE                                        | yhjE | 3672809 | 27  |
| TU-1965 | FWD | 3677365 | 3678315 | 950 MU-1278          | 3677415 kdjK                                        | kdjK | 3677442 | 27  |
| TU-1966 | FWD | 3694466 | 3697866 | 3400 MU-1279         | 3694420 bcsE;bcsF;bcsG                              | bcsE | 3694481 | 61  |
| TU-1967 | FWD | 3694466 | 3697866 | 3400 MU-1279         | 3694466 bcsE;bcsF;bcsG                              | bcsE | 3694481 | 15  |
| TU-1968 | FWD | 3698241 | 3698266 | 25 MU-1280           | 3698161 rdID                                        | rdID | 3698159 | -2  |
| TU-1969 | FWD | 3698491 | 3699141 | 650 MU-1281          | 3698565 yhjV                                        | yhjV | 3698586 | 21  |
| TU-1970 | FWD | 3699691 | 3699816 | 125 MU-1282          | 3699582 NT                                          |      |         |     |
| TU-1971 | FWD | 3705969 | 3706294 | 325 MU-1283          | 3705912 NT                                          |      |         |     |
| TU-1972 | FWD | 3710794 | 3712169 | 1375 MU-1284         | 3710942 tag;yiaC                                    | tag  | 3711115 | 173 |
| TU-1973 | FWD | 3714569 | 3715194 | 625 MU-1285          | 3714525 yiaD                                        | yiaD | 3714570 | 45  |
| TU-1974 | FWD | 3715319 | 3716269 | 950 MU-1286          | 3715310 ghrB                                        | ghrB | 3715333 | 23  |
| TU-1975 | FWD | 3717469 | 3717794 | 325 MU-1287          | 3717454 yiaG                                        | yiaG | 3717501 | 47  |
| TU-1976 | FWD | 3717469 | 3717794 | 325 MU-1287          | 3717461 yiaG                                        | yiaG | 3717501 | 40  |
| TU-1977 | FWD | 3717469 | 3717794 | 325 MU-1287          | 3717466 yiaG                                        | yiaG | 3717501 | 35  |
| TU-1978 | FWD | 3717919 | 3718244 | 325 MU-1288          | 3717912 cspA                                        | cspA | 3718072 | 160 |
| TU-1979 | FWD | 3717919 | 3718244 | 325 MU-1288          | 3718038 cspA                                        | cspA | 3718072 | 34  |
| TU-1980 | FWD | 3718703 | 3720072 | 1369 MU-1289         | 3718397 insJ;insK                                   | insJ | 3718703 | 306 |
| TU-1981 | FWD | 3720094 | 3720169 | 75 MU-1290           | sokA                                                | sokA | 3720099 |     |
| TU-1982 | FWD | 3724369 | 3724869 | 500 MU-1291          | 3723922 wecH                                        | wecH | 3723910 | -12 |
| TU-1983 | FWD | 3729154 | 3734246 | 5092 MU-1292;MU-1293 | 3729092 xylF;xylG;xylH;xylR                         | xylF | 3729154 | 62  |
| TU-1984 | FWD | 3732896 | 3734246 | 1350 MU-1293         | 3732937 xylR                                        | xylR | 3733002 | 65  |
| TU-1985 | FWD | 3735101 | 3737326 | 2225 MU-1294         | 3735030 malS                                        | malS | 3735520 | 490 |
| TU-1986 | FWD | 3735101 | 3737326 | 2225 MU-1294         | 3735218 malS                                        | malS | 3735520 | 302 |
| TU-1987 | FWD | 3737726 | 3739276 | 1550 MU-1295         | 3737697 avtA                                        | avtA | 3737728 | 31  |
| TU-1988 | FWD | 3740756 | 3748804 | 8048 MU-1296         | 3740696 yiaK;yiaL;yiaM;yiaN;yiaO;lyx;sgbH;sgbU;sgbE | yiaK | 3740756 | 60  |
| TU-1989 | FWD | 3748941 | 3749132 | 191 MU-1297          | ysaD                                                | ysaD | 3748941 |     |
| TU-1990 | FWD | 3749926 | 3750676 | 750 MU-1298          | 3749991 yiaU                                        | yiaU | 3750015 | 24  |
| TU-1991 | FWD | 3760152 | 3763827 | 3675 MU-1299         | 3760215 rhsA                                        | rhsA | 3760206 | -9  |
| TU-1992 | FWD | 3764127 | 3764977 | 850 MU-1300          | 3764190 yibA                                        | yibA | 3764360 | 170 |
| TU-1993 | FWD | 3764127 | 3764977 | 850 MU-1300          | 3764321 yibA                                        | yibA | 3764360 | 39  |
| TU-1994 | FWD | 3764127 | 3764977 | 850 MU-1300          | 3764326 yibA                                        | yibA | 3764360 | 34  |
| TU-1995 | FWD | 3765052 | 3766027 | 975 MU-1301          | 3764936 yibJ                                        | yibJ | 3765244 | 308 |
| TU-1996 | FWD | 3766252 | 3767202 | 950 MU-1302          | yibG;yibS;yibW                                      | yibG | 3766200 |     |
| TU-1997 | FWD | 3767368 | 3767703 | 335 MU-1303          | 3767397 yibV                                        | yibV | 3767368 | -29 |
| TU-1998 | FWD | 3767971 | 3768169 | 198 MU-1304          | yibU                                                | yibU | 3767971 |     |
| TU-1999 | FWD | 3770177 | 3772327 | 2150 MU-1305         | 3770149 mtIA                                        | mtIA | 3770304 | 155 |
| TU-2000 | FWD | 3770177 | 3772327 | 2150 MU-1305         | 3770212 mtIA                                        | mtIA | 3770304 | 92  |
| TU-2001 | FWD | 3772427 | 3774002 | 1575 MU-1306         | 3772407 mtID;mtIR                                   | mtID | 3772447 | 40  |
| TU-2002 | FWD | 3772427 | 3774002 | 1575 MU-1306         | 3772421 mtID;mtIR                                   | mtID | 3772447 | 26  |
| TU-2003 | FWD | 3772427 | 3774002 | 1575 MU-1306         | 3772428 mtID;mtIR                                   | mtID | 3772447 | 19  |
| TU-2004 | FWD | 3772427 | 3774002 | 1575 MU-1306         | 3772439 mtID;mtIR                                   | mtID | 3772447 | 8   |
| TU-2005 | FWD | 3774677 | 3775127 | 450 MU-1307          | 3774659 yibL                                        | yibL | 3774688 | 29  |
| TU-2006 | FWD | 3775377 | 3779127 | 3750 MU-1308         | 3775315 lldP;lldR;lldD                              | lldP | 3775422 | 107 |

|         |     |         |         |                              |                                 |      |         |      |
|---------|-----|---------|---------|------------------------------|---------------------------------|------|---------|------|
| TU-2007 | FWD | 3779252 | 3779702 | 450 MU-1309                  | 3779202 yibK                    | yibK | 3779238 | 36   |
| TU-2008 | FWD | 3783102 | 3787177 | 4075 MU-1310;MU-1311;MU-1312 | 3783229 gpmM;envC;yibQ          | gpmM | 3783283 | 54   |
| TU-2009 | FWD | 3783102 | 3787177 | 4075 MU-1310;MU-1311;MU-1312 | 3783250 gpmM;envC;yibQ          | gpmM | 3783283 | 33   |
| TU-2010 | FWD | 3783102 | 3787177 | 4075 MU-1310;MU-1311;MU-1312 | 3783255 gpmM;envC;yibQ          | gpmM | 3783283 | 28   |
| TU-2011 | FWD | 3783102 | 3787177 | 4075 MU-1310;MU-1311;MU-1312 | 3783260 gpmM;envC;yibQ          | gpmM | 3783283 | 23   |
| TU-2012 | FWD | 3784952 | 3787177 | 2225 MU-1311;MU-1312         | 3784837 envC;yibQ               | envC | 3784861 | 24   |
| TU-2013 | FWD | 3784952 | 3787177 | 2225 MU-1311;MU-1312         | 3784987 envC;yibQ               | envC | 3784861 | -126 |
| TU-2014 | FWD | 3784952 | 3787177 | 2225 MU-1311;MU-1312         | 3785034 envC;yibQ               | envC | 3784861 | -173 |
| TU-2015 | FWD | 3785902 | 3787177 | 1275 MU-1312                 | 3786063 yibQ                    | yibQ | 3786124 | 61   |
| TU-2016 | FWD | 3791802 | 3796177 | 4375 MU-1313;MU-1314         | 3791776 rfaD;rfaF;rfaC;rfaL     | rfaD | 3792010 | 234  |
| TU-2017 | FWD | 3791802 | 3796177 | 4375 MU-1313;MU-1314         | 3791833 rfaD;rfaF;rfaC;rfaL     | rfaD | 3792010 | 177  |
| TU-2018 | FWD | 3791802 | 3796177 | 4375 MU-1313;MU-1314         | 3791962 rfaD;rfaF;rfaC;rfaL     | rfaD | 3792010 | 48   |
| TU-2019 | FWD | 3791802 | 3796177 | 4375 MU-1313;MU-1314         | 3791993 rfaD;rfaF;rfaC;rfaL     | rfaD | 3792010 | 17   |
| TU-2020 | FWD | 3795077 | 3796177 | 1100 MU-1314                 | 3794947 rfaL                    | rfaL | 3794971 | 24   |
| TU-2021 | FWD | 3795077 | 3796177 | 1100 MU-1314                 | 3795078 rfaL                    | rfaL | 3794971 | -107 |
| TU-2022 | FWD | 3806556 | 3808431 | 1875 MU-1315;MU-1316         | 3806539 waaA;coaD               | waaA | 3806563 | 24   |
| TU-2023 | FWD | 3807456 | 3808431 | 975 MU-1316                  | 3807344 coaD                    | coaD | 3807848 | 504  |
| TU-2024 | FWD | 3810656 | 3813081 | 2425 MU-1317;MU-1318         | 3810724 dfp;dut;slmA            | dfp  | 3810754 | 30   |
| TU-2025 | FWD | 3811706 | 3813081 | 1375 MU-1318                 | 3811780 dut;slmA                | dut  | 3811955 | 175  |
| TU-2026 | FWD | 3811706 | 3813081 | 1375 MU-1318                 | 3811866 dut;slmA                | dut  | 3811955 | 89   |
| TU-2027 | FWD | 3814706 | 3815581 | 875 MU-1319                  | 3814671 yicC                    | yicC | 3814699 | 28   |
| TU-2028 | FWD | 3814706 | 3815581 | 875 MU-1319                  | 3814680 yicC                    | yicC | 3814699 | 19   |
| TU-2029 | FWD | 3815783 | 3816607 | 824 MU-1320                  | 3815738 dinD                    | dinD | 3815783 | 45   |
| TU-2030 | FWD | 3816897 | 3817514 | 617 MU-1321                  | yicG                            | yicG | 3816897 |      |
| TU-2031 | FWD | 3819431 | 3825281 | 5850 MU-1322;MU-1323         | 3819411 gmk;rpoZ;spoT;trmH;recG | gmk  | 3819451 | 40   |
| TU-2032 | FWD | 3819431 | 3825281 | 5850 MU-1322;MU-1323         | 3819419 gmk;rpoZ;spoT;trmH;recG | gmk  | 3819451 | 32   |
| TU-2033 | FWD | 3819431 | 3825281 | 5850 MU-1322;MU-1323         | 3819424 gmk;rpoZ;spoT;trmH;recG | gmk  | 3819451 | 27   |
| TU-2034 | FWD | 3820131 | 3825281 | 5150 MU-1323                 | 3819942 rpoZ;spoT;trmH;recG     | rpoZ | 3820129 | 187  |
| TU-2035 | FWD | 3820131 | 3825281 | 5150 MU-1323                 | 3819946 rpoZ;spoT;trmH;recG     | rpoZ | 3820129 | 183  |
| TU-2036 | FWD | 3820131 | 3825281 | 5150 MU-1323                 | 3820008 rpoZ;spoT;trmH;recG     | rpoZ | 3820129 | 121  |
| TU-2037 | FWD | 3820131 | 3825281 | 5150 MU-1323                 | 3820101 rpoZ;spoT;trmH;recG     | rpoZ | 3820129 | 28   |
| TU-2038 | FWD | 3820131 | 3825281 | 5150 MU-1323                 | 3820103 rpoZ;spoT;trmH;recG     | rpoZ | 3820129 | 26   |
| TU-2039 | FWD | 3826956 | 3828331 | 1375 MU-1324                 | 3826943 yicE                    | yicE | 3826968 | 25   |
| TU-2040 | FWD | 3826956 | 3828331 | 1375 MU-1324                 | 3826958 yicE                    | yicE | 3826968 | 10   |
| TU-2041 | FWD | 3828481 | 3830181 | 1700 MU-1325                 | 3828454 yicH                    | yicH | 3828480 | 26   |
| TU-2042 | FWD | 3834206 | 3834356 | 150 MU-1326                  | 3834176 selC                    | selC | 3834245 | 69   |
| TU-2043 | FWD | 3834448 | 3834579 | 131 MU-1327                  | yicT                            | yicT | 3834448 |      |
| TU-2044 | FWD | 3834976 | 3836160 | 1184 MU-1328                 | setC                            | setC | 3834976 |      |
| TU-2045 | FWD | 3836256 | 3837206 | 950 MU-1329                  | 3836236 yicL                    | yicL | 3836271 | 35   |
| TU-2046 | FWD | 3838031 | 3838531 | 500 MU-1330                  | 3838038 yicS                    | yicS | 3838238 | 200  |
| TU-2047 | FWD | 3842156 | 3843556 | 1400 MU-1331                 | 3841958 ade                     | ade  | 3841987 | 29   |
| TU-2048 | FWD | 3842156 | 3843556 | 1400 MU-1331                 | 3841961 ade                     | ade  | 3841987 | 26   |
| TU-2049 | FWD | 3842156 | 3843556 | 1400 MU-1331                 | 3842137 ade                     | ade  | 3841987 | -150 |
| TU-2050 | FWD | 3842156 | 3843556 | 1400 MU-1331                 | 3842154 ade                     | ade  | 3841987 | -167 |
| TU-2051 | FWD | 3851383 | 3851683 | 300 MU-1332                  | 3851354 tisA;tisB               | tisA | 3851466 | 112  |
| TU-2052 | FWD | 3852008 | 3852958 | 950 MU-1333                  | emrD                            | emrD | 3851945 |      |

|         |     |         |         |                      |                                            |      |         |     |
|---------|-----|---------|---------|----------------------|--------------------------------------------|------|---------|-----|
| TU-2053 | FWD | 3854458 | 3854683 | 225 MU-1334          | 3854453 yidI                               | yidI | 3854438 | -15 |
| TU-2054 | FWD | 3856958 | 3857133 | 175 MU-1335          | NT                                         |      |         |     |
| TU-2055 | FWD | 3858276 | 3859199 | 923 MU-1336          | 3858282 yidL                               | yidL | 3858276 | -6  |
| TU-2056 | FWD | 3861922 | 3862638 | 716 MU-1337          | 3861646 yidP                               | yidP | 3861922 | 276 |
| TU-2057 | FWD | 3865583 | 3866558 | 975 MU-1338          | 3865466 yidQ                               | yidQ | 3865751 | 285 |
| TU-2058 | FWD | 3865583 | 3866558 | 975 MU-1338          | 3865740 yidQ                               | yidQ | 3865751 | 11  |
| TU-2059 | FWD | 3865583 | 3866558 | 975 MU-1338          | 3865744 yidQ                               | yidQ | 3865751 | 7   |
| TU-2060 | FWD | 3865583 | 3866558 | 975 MU-1338          | 3865754 yidQ                               | yidQ | 3865751 | -3  |
| TU-2061 | FWD | 3867400 | 3868464 | 1064 MU-1339         | 3867376 cbrA                               | cbrA | 3867400 | 24  |
| TU-2062 | FWD | 3873368 | 3874168 | 800 MU-1340          | 3873331 yidX                               | yidX | 3873461 | 130 |
| TU-2063 | FWD | 3873368 | 3874168 | 800 MU-1340          | 3873461 yidX                               | yidX | 3873461 | 0   |
| TU-2064 | FWD | 3882121 | 3884746 | 2625 MU-1341;MU-1342 | 3882073 rpmH; rnpA; yidD; yidC             | rpmH | 3882359 | 286 |
| TU-2065 | FWD | 3882121 | 3884746 | 2625 MU-1341;MU-1342 | 3882139 rpmH; rnpA; yidD; yidC             | rpmH | 3882359 | 220 |
| TU-2066 | FWD | 3882121 | 3884746 | 2625 MU-1341;MU-1342 | 3882227 rpmH; rnpA; yidD; yidC             | rpmH | 3882359 | 132 |
| TU-2067 | FWD | 3882121 | 3884746 | 2625 MU-1341;MU-1342 | 3882262 rpmH; rnpA; yidD; yidC             | rpmH | 3882359 | 97  |
| TU-2068 | FWD | 3882121 | 3884746 | 2625 MU-1341;MU-1342 | 3882331 rpmH; rnpA; yidD; yidC             | rpmH | 3882359 | 28  |
| TU-2069 | FWD | 3883071 | 3884746 | 1675 MU-1342         | 3883077 yidC                               | yidC | 3883099 | 22  |
| TU-2070 | FWD | 3884796 | 3886171 | 1375 MU-1343         | 3884796 mnmE                               | mnmE | 3884851 | 55  |
| TU-2071 | FWD | 3886397 | 3886547 | 150 MU-1344          | 3886434 tnaC                               | tnaC | 3886458 | 24  |
| TU-2072 | FWD | 3886753 | 3888168 | 1415 MU-1345         | 3886568 tnaA                               | tnaA | 3886753 | 185 |
| TU-2073 | FWD | 3888259 | 3889506 | 1247 MU-1346         | tnaB                                       | tnaB | 3888259 |     |
| TU-2074 | FWD | 3889638 | 3890813 | 1175 MU-1347         | mdtL                                       | mdtL | 3889638 |     |
| TU-2075 | FWD | 3890747 | 3891547 | 800 MU-1348          | 3890742 yidZ                               | yidZ | 3890788 | 46  |
| TU-2076 | FWD | 3891822 | 3893372 | 1550 MU-1349         | 3891852 yieE; yieF                         | yieE | 3891892 | 40  |
| TU-2077 | FWD | 3891822 | 3893372 | 1550 MU-1349         | 3891875 yieE; yieF                         | yieE | 3891892 | 17  |
| TU-2078 | FWD | 3894722 | 3895447 | 725 MU-1350          | 3894574 yieH                               | yieH | 3894797 | 223 |
| TU-2079 | FWD | 3894722 | 3895447 | 725 MU-1350          | 3894698 yieH                               | yieH | 3894797 | 99  |
| TU-2080 | FWD | 3895622 | 3896622 | 1000 MU-1351         | 3895504 cbrB; cbrC                         | cbrB | 3895529 | 25  |
| TU-2081 | FWD | 3895622 | 3896622 | 1000 MU-1351         | 3895618 cbrB; cbrC                         | cbrB | 3895529 | -89 |
| TU-2082 | FWD | 3902422 | 3902897 | 475 MU-1352          | 3902442 NT                                 |      |         |     |
| TU-2083 | FWD | 3920657 | 3920907 | 250 MU-1353          | 3920627 NT                                 |      |         |     |
| TU-2084 | FWD | 3925182 | 3926082 | 900 MU-1354          | 3925155 asnA                               | asnA | 3925178 | 23  |
| TU-2085 | FWD | 3929132 | 3931157 | 2025 MU-1355         | 3929239 kup                                | kup  | 3929339 | 100 |
| TU-2086 | FWD | 3931382 | 3935157 | 3775 MU-1356         | 3931345 rbsD; rbsA; rbsC; rbsB             | rbsD | 3931374 | 29  |
| TU-2087 | FWD | 3935182 | 3936057 | 875 MU-1357          | 3935178 rbsK                               | rbsK | 3935317 | 139 |
| TU-2088 | FWD | 3935182 | 3936057 | 875 MU-1357          | 3935192 rbsK                               | rbsK | 3935317 | 125 |
| TU-2089 | FWD | 3936082 | 3937107 | 1025 MU-1358         | 3936225 rbsR                               | rbsR | 3936250 | 25  |
| TU-2090 | FWD | 3939482 | 3944885 | 5403 MU-1359         | 3939656 rrsC; gltU; rrlC; rrfC             | rrsC | 3939831 | 175 |
| TU-2091 | FWD | 3939482 | 3944885 | 5403 MU-1359         | 3939830 rrsC; gltU; rrlC; rrfC             | rrsC | 3939831 | 1   |
| TU-2092 | FWD | 3944910 | 3944963 | 53 MU-1360           | aspT                                       | aspT | 3944895 |     |
| TU-2093 | FWD | 3944988 | 3945038 | 50 MU-1361           | trpT                                       | trpT | 3944980 |     |
| TU-2094 | FWD | 3946088 | 3946438 | 350 MU-1362          | 3946073 yifE                               | yifE | 3946109 | 36  |
| TU-2095 | FWD | 3946088 | 3946438 | 350 MU-1362          | 3946081 yifE                               | yifE | 3946109 | 28  |
| TU-2096 | FWD | 3946088 | 3946438 | 350 MU-1362          | 3946093 yifE                               | yifE | 3946109 | 16  |
| TU-2097 | FWD | 3946488 | 3946713 | 225 MU-1363          | 3946474 NT                                 |      |         |     |
| TU-2098 | FWD | 3948288 | 3954886 | 6598 MU-1364         | 3948313 ilvL; ilvG; ilvM; ilvE; ilvD; ilvA | ilvL | 3948345 | 32  |

|         |     |         |         |                               |                                                                            |      |         |      |
|---------|-----|---------|---------|-------------------------------|----------------------------------------------------------------------------|------|---------|------|
| TU-2099 | FWD | 3948288 | 3954886 | 6598 MU-1364                  | 3948461 ilvL;ilvG;ilvM;ilvE;ilvD;ilvA                                      | ilvL | 3948345 | -116 |
| TU-2100 | FWD | 3955961 | 3957686 | 1725 MU-1365                  | 3955939 ilvC                                                               | ilvC | 3955993 | 54   |
| TU-2101 | FWD | 3955961 | 3957686 | 1725 MU-1365                  | 3955960 ilvC                                                               | ilvC | 3955993 | 33   |
| TU-2102 | FWD | 3955961 | 3957686 | 1725 MU-1365                  | 3955969 ilvC                                                               | ilvC | 3955993 | 24   |
| TU-2103 | FWD | 3955961 | 3957686 | 1725 MU-1365                  | 3955977 ilvC                                                               | ilvC | 3955993 | 16   |
| TU-2104 | FWD | 3955961 | 3957686 | 1725 MU-1365                  | 3955987 ilvC                                                               | ilvC | 3955993 | 6    |
| TU-2105 | FWD | 3958686 | 3960711 | 2025 MU-1366                  | 3958673 rep                                                                | rep  | 3958700 | 27   |
| TU-2106 | FWD | 3963411 | 3963686 | 275 MU-1367                   | 3963396 NT                                                                 |      |         |      |
| TU-2107 | FWD | 3963711 | 3964236 | 525 MU-1368                   | 3963673 trxA                                                               | trxA | 3963784 | 111  |
| TU-2108 | FWD | 3963711 | 3964236 | 525 MU-1368                   | 3963683 trxA                                                               | trxA | 3963784 | 101  |
| TU-2109 | FWD | 3963711 | 3964236 | 525 MU-1368                   | 3963702 trxA                                                               | trxA | 3963784 | 82   |
| TU-2110 | FWD | 3963711 | 3964236 | 525 MU-1368                   | 3963714 trxA                                                               | trxA | 3963784 | 70   |
| TU-2111 | FWD | 3963711 | 3964236 | 525 MU-1368                   | 3963763 trxA                                                               | trxA | 3963784 | 21   |
| TU-2112 | FWD | 3964261 | 3965636 | 1375 MU-1369                  | 3964185 rho                                                                | rho  | 3964440 | 255  |
| TU-2113 | FWD | 3964261 | 3965636 | 1375 MU-1369                  | 3964218 rho                                                                | rho  | 3964440 | 222  |
| TU-2114 | FWD | 3964261 | 3965636 | 1375 MU-1369                  | 3964227 rho                                                                | rho  | 3964440 | 213  |
| TU-2115 | FWD | 3964261 | 3965636 | 1375 MU-1369                  | 3964270 rho                                                                | rho  | 3964440 | 170  |
| TU-2116 | FWD | 3965786 | 3978637 | 12851 MU-1370;MU-1371;MU-1372 | 3965913 rfe;wzzE;rffE;rffD;rffG;rffH;rffC;rffA;wzxE;rff rfe<br>T;wzyE;rffM | rfe  | 3965939 | 26   |
| TU-2117 | FWD | 3965786 | 3978637 | 12851 MU-1370;MU-1371;MU-1372 | 3965919 rfe;wzzE;rffE;rffD;rffG;rffH;rffC;rffA;wzxE;rff rfe<br>T;wzyE;rffM | rfe  | 3965939 | 20   |
| TU-2118 | FWD | 3966987 | 3978637 | 11650 MU-1371;MU-1372         | 3966885 wzzE;rffE;rffD;rffG;rffH;rffC;rffA;wzxE;rffT;w wzzE<br>zyE;rffM    | wzzE | 3967054 | 169  |
| TU-2119 | FWD | 3966987 | 3978637 | 11650 MU-1371;MU-1372         | 3966887 wzzE;rffE;rffD;rffG;rffH;rffC;rffA;wzxE;rffT;w wzzE<br>zyE;rffM    | wzzE | 3967054 | 167  |
| TU-2120 | FWD | 3966987 | 3978637 | 11650 MU-1371;MU-1372         | 3967150 wzzE;rffE;rffD;rffG;rffH;rffC;rffA;wzxE;rffT;w wzzE<br>zyE;rffM    | wzzE | 3967054 | -96  |
| TU-2121 | FWD | 3966987 | 3978637 | 11650 MU-1371;MU-1372         | 3967199 wzzE;rffE;rffD;rffG;rffH;rffC;rffA;wzxE;rffT;w wzzE<br>zyE;rffM    | wzzE | 3967054 | -145 |
| TU-2122 | FWD | 3968312 | 3978637 | 10325 MU-1372                 | 3968173 rffE;rffD;rffG;rffH;rffC;rffA;wzxE;rffT;wzyE;rf rffE<br>fM         | rffE | 3968156 | -17  |
| TU-2123 | FWD | 3968312 | 3978637 | 10325 MU-1372                 | 3968253 rffE;rffD;rffG;rffH;rffC;rffA;wzxE;rffT;wzyE;rf rffE<br>fM         | rffE | 3968156 | -97  |
| TU-2124 | FWD | 3978862 | 3980312 | 1450 MU-1373                  | 3978846 yifK                                                               | yifK | 3978910 | 64   |
| TU-2125 | FWD | 3980337 | 3980837 | 500 MU-1374                   | 3980385 argX;hisR;leuT;proM                                                | argX | 3980398 | 13   |
| TU-2126 | FWD | 3980337 | 3980837 | 500 MU-1374                   | 3980398 argX;hisR;leuT;proM                                                | argX | 3980398 | 0    |
| TU-2127 | FWD | 3980981 | 3982216 | 1235 MU-1375                  | 3980943 aslB                                                               | aslB | 3980981 | 38   |
| TU-2128 | FWD | 3984387 | 3984612 | 225 MU-1376                   | 3984454 glmZ                                                               | glmZ | 3984455 | 1    |
| TU-2129 | FWD | 3988812 | 3988912 | 100 MU-1377                   | 3988860 NT                                                                 |      |         |      |
| TU-2130 | FWD | 3988812 | 3988912 | 100 MU-1377                   | 3988889 NT                                                                 |      |         |      |
| TU-2131 | FWD | 3988987 | 3991765 | 2778 MU-1378                  | 3988975 cyaA                                                               | cyaA | 3989176 | 201  |
| TU-2132 | FWD | 3988987 | 3991765 | 2778 MU-1378                  | 3989022 cyaA                                                               | cyaA | 3989176 | 154  |
| TU-2133 | FWD | 3988987 | 3991765 | 2778 MU-1378                  | 3989081 cyaA                                                               | cyaA | 3989176 | 95   |
| TU-2134 | FWD | 3988987 | 3991765 | 2778 MU-1378                  | 3989090 cyaA                                                               | cyaA | 3989176 | 86   |
| TU-2135 | FWD | 3992490 | 3995915 | 3425 MU-1379                  | 3992514 yifL;dapF;yigA;xerC;yigB                                           | yifL | 3992545 | 31   |
| TU-2136 | FWD | 3992490 | 3995915 | 3425 MU-1379                  | 3992528 yifL;dapF;yigA;xerC;yigB                                           | yifL | 3992545 | 17   |

|         |     |         |         |                      |                                  |      |         |      |
|---------|-----|---------|---------|----------------------|----------------------------------|------|---------|------|
| TU-2137 | FWD | 3995965 | 3998240 | 2275 MU-1380         | 3995930 uvrD                     | uvrD | 3996006 | 76   |
| TU-2138 | FWD | 3999090 | 4000390 | 1300 MU-1381         | 3999215 corA                     | corA | 3999449 | 234  |
| TU-2139 | FWD | 3999090 | 4000390 | 1300 MU-1381         | 3999221 corA                     | corA | 3999449 | 228  |
| TU-2140 | FWD | 3999090 | 4000390 | 1300 MU-1381         | 3999296 corA                     | corA | 3999449 | 153  |
| TU-2141 | FWD | 3999090 | 4000390 | 1300 MU-1381         | 3999326 corA                     | corA | 3999449 | 123  |
| TU-2142 | FWD | 4002865 | 4003790 | 925 MU-1382          | 4002838 pldA                     | pldA | 4002885 | 47   |
| TU-2143 | FWD | 4002865 | 4003790 | 925 MU-1382          | 4002852 pldA                     | pldA | 4002885 | 33   |
| TU-2144 | FWD | 4003890 | 4006465 | 2575 MU-1383         | 4003859 recQ;rhtC                | recQ | 4003887 | 28   |
| TU-2145 | FWD | 4003890 | 4006465 | 2575 MU-1383         | 4003866 recQ;rhtC                | recQ | 4003887 | 21   |
| TU-2146 | FWD | 4007115 | 4008965 | 1850 MU-1384         | 4007163 pldB;yigL                | pldB | 4007193 | 30   |
| TU-2147 | FWD | 4009115 | 4009790 | 675 MU-1385          | 4008982 yigM                     | yigM | 4009099 | 117  |
| TU-2148 | FWD | 4010915 | 4013515 | 2600 MU-1386         | 4010909 metE                     | metE | 4011076 | 167  |
| TU-2149 | FWD | 4010915 | 4013515 | 2600 MU-1386         | 4010915 metE                     | metE | 4011076 | 161  |
| TU-2150 | FWD | 4010915 | 4013515 | 2600 MU-1386         | 4010921 metE                     | metE | 4011076 | 155  |
| TU-2151 | FWD | 4010915 | 4013515 | 2600 MU-1386         | 4010925 metE                     | metE | 4011076 | 151  |
| TU-2152 | FWD | 4010915 | 4013515 | 2600 MU-1386         | 4010930 metE                     | metE | 4011076 | 146  |
| TU-2153 | FWD | 4010915 | 4013515 | 2600 MU-1386         | 4010939 metE                     | metE | 4011076 | 137  |
| TU-2154 | FWD | 4010915 | 4013515 | 2600 MU-1386         | 4010946 metE                     | metE | 4011076 | 130  |
| TU-2155 | FWD | 4010915 | 4013515 | 2600 MU-1386         | 4010954 metE                     | metE | 4011076 | 122  |
| TU-2156 | FWD | 4010915 | 4013515 | 2600 MU-1386         | 4011033 metE                     | metE | 4011076 | 43   |
| TU-2157 | FWD | 4010915 | 4013515 | 2600 MU-1386         | 4011040 metE                     | metE | 4011076 | 36   |
| TU-2158 | FWD | 4010915 | 4013515 | 2600 MU-1386         | 4011050 metE                     | metE | 4011076 | 26   |
| TU-2159 | FWD | 4010915 | 4013515 | 2600 MU-1386         | 4011057 metE                     | metE | 4011076 | 19   |
| TU-2160 | FWD | 4014040 | 4016465 | 2425 MU-1387         | 4014410 udp;rmuC                 | udp  | 4014454 | 44   |
| TU-2161 | FWD | 4014040 | 4016465 | 2425 MU-1387         | 4014418 udp;rmuC                 | udp  | 4014454 | 36   |
| TU-2162 | FWD | 4014040 | 4016465 | 2425 MU-1387         | 4014427 udp;rmuC                 | udp  | 4014454 | 27   |
| TU-2163 | FWD | 4016590 | 4019940 | 3350 MU-1388         | 4016743 ubiE;yigP;ubiB           | ubiE | 4016878 | 135  |
| TU-2164 | FWD | 4019965 | 4022440 | 2475 MU-1389         | 4019890 tatA;tatB;tatC;tatD      | tatA | 4019968 | 78   |
| TU-2165 | FWD | 4019965 | 4022440 | 2475 MU-1389         | 4019932 tatA;tatB;tatC;tatD      | tatA | 4019968 | 36   |
| TU-2166 | FWD | 4019965 | 4022440 | 2475 MU-1389         | 4019999 tatA;tatB;tatC;tatD      | tatA | 4019968 | -31  |
| TU-2167 | FWD | 4022865 | 4025690 | 2825 MU-1390         | 4022835 ubiD;fre                 | ubiD | 4023011 | 176  |
| TU-2168 | FWD | 4022865 | 4025690 | 2825 MU-1390         | 4022995 ubiD;fre                 | ubiD | 4023011 | 16   |
| TU-2169 | FWD | 4029117 | 4033192 | 4075 MU-1391;MU-1392 | 4029153 pepQ;yigZ;trkH;hemG      | pepQ | 4029184 | 31   |
| TU-2170 | FWD | 4029117 | 4033192 | 4075 MU-1391;MU-1392 | 4029161 pepQ;yigZ;trkH;hemG      | pepQ | 4029184 | 23   |
| TU-2171 | FWD | 4031142 | 4033192 | 2050 MU-1392         | 4031257 trkH;hemG                | trkH | 4031168 | -89  |
| TU-2172 | FWD | 4031142 | 4033192 | 2050 MU-1392         | 4031295 trkH;hemG                | trkH | 4031168 | -127 |
| TU-2173 | FWD | 4033217 | 4038670 | 5453 MU-1393         | 4033095 rrsA;ileT;alaT;rrlA;rrfA | rrsA | 4033554 | 459  |
| TU-2174 | FWD | 4040095 | 4040420 | 325 MU-1394          | 4040070 yihD                     | yihD | 4040092 | 22   |
| TU-2175 | FWD | 4040445 | 4041350 | 905 MU-1395          | 4040414 rdoA                     | rdoA | 4040438 | 24   |
| TU-2176 | FWD | 4041375 | 4042050 | 675 MU-1396          | 4041400 dsbA                     | dsbA | 4041441 | 41   |
| TU-2177 | FWD | 4041375 | 4042050 | 675 MU-1396          | 4041406 dsbA                     | dsbA | 4041441 | 35   |
| TU-2178 | FWD | 4042222 | 4043652 | 1430 MU-1397         | yihF                             | yihF | 4042222 |      |
| TU-2179 | FWD | 4044881 | 4047756 | 2875 MU-1398         | 4044962 polA                     | polA | 4044989 | 27   |
| TU-2180 | FWD | 4047806 | 4048031 | 225 MU-1399          | 4047922 spf                      | spf  | 4047922 | 0    |
| TU-2181 | FWD | 4049006 | 4049256 | 250 MU-1400          | 4049059 csrC                     | csrC | 4049059 | 0    |
| TU-2182 | FWD | 4049356 | 4051656 | 2300 MU-1401         | 4049330 yihI;hemN                | yihI | 4049370 | 40   |



|         |     |         |         |                      |                                      |      |         |     |
|---------|-----|---------|---------|----------------------|--------------------------------------|------|---------|-----|
| TU-2183 | FWD | 4056306 | 4058231 | 1925 MU-1402         | 4056196 typA                         | typA | 4056430 | 234 |
| TU-2184 | FWD | 4056306 | 4058231 | 1925 MU-1402         | 4056241 typA                         | typA | 4056430 | 189 |
| TU-2185 | FWD | 4056306 | 4058231 | 1925 MU-1402         | 4056270 typA                         | typA | 4056430 | 160 |
| TU-2186 | FWD | 4056306 | 4058231 | 1925 MU-1402         | 4056298 typA                         | typA | 4056430 | 132 |
| TU-2187 | FWD | 4056306 | 4058231 | 1925 MU-1402         | 4056405 typA                         | typA | 4056430 | 25  |
| TU-2188 | FWD | 4058470 | 4060168 | 1698 MU-1403         | 4058442 yihL;yihM                    | yihL | 4058470 | 28  |
| TU-2189 | FWD | 4059188 | 4060168 | 980 MU-1404          | 4059011 yihM                         | yihM | 4059188 | 177 |
| TU-2190 | FWD | 4060270 | 4061535 | 1265 MU-1405         | yihN                                 | yihN | 4060270 |     |
| TU-2191 | FWD | 4071783 | 4076458 | 4675 MU-1406;MU-1407 | 4071765 yihV;yihW;yihX;yihY;dtd;yiiD | yihV | 4071762 | -3  |
| TU-2192 | FWD | 4073908 | 4076458 | 2550 MU-1407         | 4073552 yihX;yihY;dtd;yiiD           | yihX | 4073576 | 24  |
| TU-2193 | FWD | 4077320 | 4077532 | 212 MU-1408          | yiiE                                 | yiiE | 4077320 |     |
| TU-2194 | FWD | 4077774 | 4077992 | 218 MU-1409          | 4077718 yiiF                         | yiiF | 4077774 | 56  |
| TU-2195 | FWD | 4084008 | 4084808 | 800 MU-1410          | 4083961 fdhD                         | fdhD | 4084039 | 78  |
| TU-2196 | FWD | 4085025 | 4086080 | 1055 MU-1411         | yiiG                                 | yiiG | 4085025 |     |
| TU-2197 | FWD | 4095759 | 4097517 | 1758 MU-1412         | 4095703 rhaS;rhaR                    | rhaS | 4095759 | 56  |
| TU-2198 | FWD | 4095759 | 4097517 | 1758 MU-1412         | 4095774 rhaS;rhaR                    | rhaS | 4095759 | -15 |
| TU-2199 | FWD | 4098795 | 4100670 | 1875 MU-1413         | 4098782 sodA;kdgT                    | sodA | 4098833 | 51  |
| TU-2200 | FWD | 4098795 | 4100670 | 1875 MU-1413         | 4098787 sodA;kdgT                    | sodA | 4098833 | 46  |
| TU-2201 | FWD | 4098795 | 4100670 | 1875 MU-1413         | 4098818 sodA;kdgT                    | sodA | 4098833 | 15  |
| TU-2202 | FWD | 4098795 | 4100670 | 1875 MU-1413         | 4098831 sodA;kdgT                    | sodA | 4098833 | 2   |
| TU-2203 | FWD | 4100845 | 4101595 | 750 MU-1414          | 4100809 yiiM                         | yiiM | 4100845 | 36  |
| TU-2204 | FWD | 4100845 | 4101595 | 750 MU-1414          | 4100821 yiiM                         | yiiM | 4100845 | 24  |
| TU-2205 | FWD | 4100845 | 4101595 | 750 MU-1414          | 4100823 yiiM                         | yiiM | 4100845 | 22  |
| TU-2206 | FWD | 4103820 | 4104370 | 550 MU-1415          | 4103808 cpxP                         | cpxP | 4103843 | 35  |
| TU-2207 | FWD | 4104495 | 4105420 | 925 MU-1416          | 4104313 fieF                         | fieF | 4104492 | 179 |
| TU-2208 | FWD | 4104495 | 4105420 | 925 MU-1416          | 4104353 fieF                         | fieF | 4104492 | 139 |
| TU-2209 | FWD | 4104495 | 4105420 | 925 MU-1416          | 4104472 fieF                         | fieF | 4104492 | 20  |
| TU-2210 | FWD | 4105445 | 4106695 | 1250 MU-1417         | 4105495 pfkA                         | pfkA | 4105575 | 80  |
| TU-2211 | FWD | 4105445 | 4106695 | 1250 MU-1417         | 4105542 pfkA                         | pfkA | 4105575 | 33  |
| TU-2212 | FWD | 4105445 | 4106695 | 1250 MU-1417         | 4105548 pfkA                         | pfkA | 4105575 | 27  |
| TU-2213 | FWD | 4105445 | 4106695 | 1250 MU-1417         | 4105554 pfkA                         | pfkA | 4105575 | 21  |
| TU-2214 | FWD | 4105445 | 4106695 | 1250 MU-1417         | 4105562 pfkA                         | pfkA | 4105575 | 13  |
| TU-2215 | FWD | 4106820 | 4107820 | 1000 MU-1418         | 4106828 sbp                          | sbp  | 4106857 | 29  |
| TU-2216 | FWD | 4107998 | 4108648 | 650 MU-1419          | cdh                                  | cdh  | 4107953 |     |
| TU-2217 | FWD | 4110098 | 4110748 | 650 MU-1420          | 4110278 yiiR                         | yiiR | 4110338 | 60  |
| TU-2218 | FWD | 4110873 | 4111773 | 900 MU-1421          | 4110750 yiiS;uspD                    | yiiS | 4110990 | 240 |
| TU-2219 | FWD | 4110873 | 4111773 | 900 MU-1421          | 4110954 yiiS;uspD                    | yiiS | 4110990 | 36  |
| TU-2220 | FWD | 4116373 | 4116973 | 600 MU-1422          | 4116450 yiiU                         | yiiU | 4116538 | 88  |
| TU-2221 | FWD | 4116373 | 4116973 | 600 MU-1422          | 4116458 yiiU                         | yiiU | 4116538 | 80  |
| TU-2222 | FWD | 4116373 | 4116973 | 600 MU-1422          | 4116467 yiiU                         | yiiU | 4116538 | 71  |
| TU-2223 | FWD | 4116373 | 4116973 | 600 MU-1422          | 4116471 yiiU                         | yiiU | 4116538 | 67  |
| TU-2224 | FWD | 4116373 | 4116973 | 600 MU-1422          | 4116502 yiiU                         | yiiU | 4116538 | 36  |
| TU-2225 | FWD | 4116373 | 4116973 | 600 MU-1422          | 4116519 yiiU                         | yiiU | 4116538 | 19  |
| TU-2226 | FWD | 4116373 | 4116973 | 600 MU-1422          | 4116526 yiiU                         | yiiU | 4116538 | 12  |
| TU-2227 | FWD | 4120423 | 4120548 | 125 MU-1423          | 4120392 NT                           |      |         |     |
| TU-2228 | FWD | 4124898 | 4125248 | 350 MU-1424          | 4124936 rpmE                         | rpmE | 4125036 | 100 |

|         |     |         |         |                               |                                       |      |         |     |
|---------|-----|---------|---------|-------------------------------|---------------------------------------|------|---------|-----|
| TU-2229 | FWD | 4124898 | 4125248 | 350 MU-1424                   | 4124969 rpmE                          | rpmE | 4125036 | 67  |
| TU-2230 | FWD | 4124898 | 4125248 | 350 MU-1424                   | 4124975 rpmE                          | rpmE | 4125036 | 61  |
| TU-2231 | FWD | 4126673 | 4130348 | 3675 MU-1425                  | 4126658 metB;metL                     | metB | 4126695 | 37  |
| TU-2232 | FWD | 4130598 | 4131723 | 1125 MU-1426                  | 4130573 metF                          | metF | 4130639 | 66  |
| TU-2233 | FWD | 4130598 | 4131723 | 1125 MU-1426                  | 4130610 metF                          | metF | 4130639 | 29  |
| TU-2234 | FWD | 4131773 | 4134373 | 2600 MU-1427                  | 4131813 katG                          | katG | 4131858 | 45  |
| TU-2235 | FWD | 4131773 | 4134373 | 2600 MU-1427                  | 4131817 katG                          | katG | 4131858 | 41  |
| TU-2236 | FWD | 4131773 | 4134373 | 2600 MU-1427                  | 4131823 katG                          | katG | 4131858 | 35  |
| TU-2237 | FWD | 4131773 | 4134373 | 2600 MU-1427                  | 4131834 katG                          | katG | 4131858 | 24  |
| TU-2238 | FWD | 4134131 | 4135036 | 905 MU-1428                   | yijE                                  | yijE | 4134131 |     |
| TU-2239 | FWD | 4140553 | 4145502 | 4949 MU-1429                  | frwC;frwB;pflD;pflC;frwD              | frwC | 4140553 |     |
| TU-2240 | FWD | 4148473 | 4149398 | 925 MU-1430                   | 4148383 NT                            |      |         |     |
| TU-2241 | FWD | 4151198 | 4151773 | 575 MU-1431                   | 4151359 NT                            |      |         |     |
| TU-2242 | FWD | 4152948 | 4156423 | 3475 MU-1432                  | 4152908 argC;argB;argH                | argC | 4153024 | 116 |
| TU-2243 | FWD | 4152948 | 4156423 | 3475 MU-1432                  | 4153001 argC;argB;argH                | argC | 4153024 | 23  |
| TU-2244 | FWD | 4156498 | 4157323 | 825 MU-1433                   | 4156479 oxyR                          | oxyR | 4156513 | 34  |
| TU-2245 | FWD | 4156498 | 4157323 | 825 MU-1433                   | 4156517 oxyR                          | oxyR | 4156513 | -4  |
| TU-2246 | FWD | 4159110 | 4160385 | 1275 MU-1434                  | 4159102 fabR;yijD                     | fabR | 4159147 | 45  |
| TU-2247 | FWD | 4159110 | 4160385 | 1275 MU-1434                  | 4159117 fabR;yijD                     | fabR | 4159147 | 30  |
| TU-2248 | FWD | 4161435 | 4164385 | 2950 MU-1435;MU-1436          | 4161428 btuB;murI                     | btuB | 4161662 | 234 |
| TU-2249 | FWD | 4163360 | 4164385 | 1025 MU-1436                  | 4163423 murI                          | murI | 4163451 | 28  |
| TU-2250 | FWD | 4164410 | 4169785 | 5375 MU-1437                  | 4164242 rrsB;glT;rrlB;rrfB            | rrsB | 4164682 | 440 |
| TU-2251 | FWD | 4169960 | 4172035 | 2075 MU-1438                  | 4170057 murB;birA                     | murB | 4170080 | 23  |
| TU-2252 | FWD | 4173285 | 4175260 | 1975 MU-1439                  | 4173311 thrU;tyrU;glyT;thrT;tufB      | thrU | 4173411 | 100 |
| TU-2253 | FWD | 4173285 | 4175260 | 1975 MU-1439                  | 4173411 thrU;tyrU;glyT;thrT;tufB      | thrU | 4173411 | 0   |
| TU-2254 | FWD | 4175285 | 4176335 | 1050 MU-1440                  | 4175236 secE;nusG                     | secE | 4175381 | 145 |
| TU-2255 | FWD | 4175285 | 4176335 | 1050 MU-1440                  | 4175269 secE;nusG                     | secE | 4175381 | 112 |
| TU-2256 | FWD | 4175285 | 4176335 | 1050 MU-1440                  | 4175319 secE;nusG                     | secE | 4175381 | 62  |
| TU-2257 | FWD | 4176360 | 4187589 | 11229 MU-1441;MU-1442;MU-1443 | 4176380 rplK;rplA;rplJ;rplL;rpoB;rpoC | rplK | 4176470 | 90  |
| TU-2258 | FWD | 4176360 | 4187589 | 11229 MU-1441;MU-1442;MU-1443 | 4176412 rplK;rplA;rplJ;rplL;rpoB;rpoC | rplK | 4176470 | 58  |
| TU-2259 | FWD | 4177560 | 4187589 | 10029 MU-1442;MU-1443         | 4177606 rplJ;rplL;rpoB;rpoC           | rplJ | 4178019 | 413 |
| TU-2260 | FWD | 4177560 | 4187589 | 10029 MU-1442;MU-1443         | 4177645 rplJ;rplL;rpoB;rpoC           | rplJ | 4178019 | 374 |
| TU-2261 | FWD | 4177560 | 4187589 | 10029 MU-1442;MU-1443         | 4177802 rplJ;rplL;rpoB;rpoC           | rplJ | 4178019 | 217 |
| TU-2262 | FWD | 4177560 | 4187589 | 10029 MU-1442;MU-1443         | 4177842 rplJ;rplL;rpoB;rpoC           | rplJ | 4178019 | 177 |
| TU-2263 | FWD | 4177560 | 4187589 | 10029 MU-1442;MU-1443         | 4177902 rplJ;rplL;rpoB;rpoC           | rplJ | 4178019 | 117 |
| TU-2264 | FWD | 4177560 | 4187589 | 10029 MU-1442;MU-1443         | 4177941 rplJ;rplL;rpoB;rpoC           | rplJ | 4178019 | 78  |
| TU-2265 | FWD | 4179035 | 4187589 | 8554 MU-1443                  | 4179085 rpoB;rpoC                     | rpoB | 4179268 | 183 |
| TU-2266 | FWD | 4179035 | 4187589 | 8554 MU-1443                  | 4179145 rpoB;rpoC                     | rpoB | 4179268 | 123 |
| TU-2267 | FWD | 4179035 | 4187589 | 8554 MU-1443                  | 4179160 rpoB;rpoC                     | rpoB | 4179268 | 108 |
| TU-2268 | FWD | 4179035 | 4187589 | 8554 MU-1443                  | 4179201 rpoB;rpoC                     | rpoB | 4179268 | 67  |
| TU-2269 | FWD | 4187809 | 4188348 | 539 MU-1444                   | 4187644 yjaZ                          | yjaZ | 4187809 | 165 |
| TU-2270 | FWD | 4194749 | 4197524 | 2775 MU-1445;MU-1446;MU-1447  | 4194721 nudC;hemE;nfi                 | nudC | 4194926 | 205 |
| TU-2271 | FWD | 4194749 | 4197524 | 2775 MU-1445;MU-1446;MU-1447  | 4194727 nudC;hemE;nfi                 | nudC | 4194926 | 199 |
| TU-2272 | FWD | 4195574 | 4197524 | 1950 MU-1446;MU-1447          | 4195715 hemE;nfi                      | hemE | 4195739 | 24  |
| TU-2273 | FWD | 4195574 | 4197524 | 1950 MU-1446;MU-1447          | 4195747 hemE;nfi                      | hemE | 4195739 | -8  |
| TU-2274 | FWD | 4196924 | 4197524 | 600 MU-1447                   | 4196733 nfi                           | nfi  | 4196813 | 80  |

|         |     |         |         |                      |                             |      |         |      |
|---------|-----|---------|---------|----------------------|-----------------------------|------|---------|------|
| TU-2275 | FWD | 4197549 | 4198124 | 575 MU-1448          | 4197503 yjaG                | yjaG | 4197527 | 24   |
| TU-2276 | FWD | 4198149 | 4199324 | 1175 MU-1449         | 4198163 hupA;yjaH           | hupA | 4198304 | 141  |
| TU-2277 | FWD | 4198149 | 4199324 | 1175 MU-1449         | 4198199 hupA;yjaH           | hupA | 4198304 | 105  |
| TU-2278 | FWD | 4199949 | 4201099 | 1150 MU-1450         | 4199842 zraS                | zraS | 4199949 | 107  |
| TU-2279 | FWD | 4201274 | 4202599 | 1325 MU-1451         | 4201161 zraR                | zraR | 4201343 | 182  |
| TU-2280 | FWD | 4201274 | 4202599 | 1325 MU-1451         | 4201236 zraR                | zraR | 4201343 | 107  |
| TU-2281 | FWD | 4205800 | 4211177 | 5377 MU-1452         | 4205995 rrsE;gltV;rrlE;rrfE | rrsE | 4206170 | 175  |
| TU-2282 | FWD | 4211257 | 4211640 | 383 MU-1453          | yjaA                        | yjaA | 4211257 |      |
| TU-2283 | FWD | 4212227 | 4213252 | 1025 MU-1454         | 4212258 metA                | metA | 4212303 | 45   |
| TU-2284 | FWD | 4212227 | 4213252 | 1025 MU-1454         | 4212274 metA                | metA | 4212303 | 29   |
| TU-2285 | FWD | 4213452 | 4218602 | 5150 MU-1455;MU-1456 | 4213427 aceB;aceA;aceK      | aceB | 4213501 | 74   |
| TU-2286 | FWD | 4213452 | 4218602 | 5150 MU-1455;MU-1456 | 4213455 aceB;aceA;aceK      | aceB | 4213501 | 46   |
| TU-2287 | FWD | 4216552 | 4218602 | 2050 MU-1456         | 4216684 aceK                | aceK | 4216619 | -65  |
| TU-2288 | FWD | 4216552 | 4218602 | 2050 MU-1456         | 4216688 aceK                | aceK | 4216619 | -69  |
| TU-2289 | FWD | 4221832 | 4225507 | 3675 MU-1457         | 4221807 metH                | metH | 4221851 | 44   |
| TU-2290 | FWD | 4221832 | 4225507 | 3675 MU-1457         | 4221810 metH                | metH | 4221851 | 41   |
| TU-2291 | FWD | 4225657 | 4227382 | 1725 MU-1458         | 4225603 yjbB                | yjbB | 4225754 | 151  |
| TU-2292 | FWD | 4225657 | 4227382 | 1725 MU-1458         | 4225625 yjbB                | yjbB | 4225754 | 129  |
| TU-2293 | FWD | 4228382 | 4229283 | 901 MU-1459          | 4228359 rluF                | rluF | 4228377 | 18   |
| TU-2294 | FWD | 4231608 | 4233558 | 1950 MU-1460         | 4231740 pgi                 | pgi  | 4231781 | 41   |
| TU-2295 | FWD | 4231608 | 4233558 | 1950 MU-1460         | 4231744 pgi                 | pgi  | 4231781 | 37   |
| TU-2296 | FWD | 4231608 | 4233558 | 1950 MU-1460         | 4231747 pgi                 | pgi  | 4231781 | 34   |
| TU-2297 | FWD | 4231608 | 4233558 | 1950 MU-1460         | 4231755 pgi                 | pgi  | 4231781 | 26   |
| TU-2298 | FWD | 4231608 | 4233558 | 1950 MU-1460         | 4231763 pgi                 | pgi  | 4231781 | 18   |
| TU-2299 | FWD | 4234033 | 4237583 | 3550 MU-1461         | 4233961 yjbE;yjbF;yjbG;yjbH | yjbE | 4233929 | -32  |
| TU-2300 | FWD | 4238333 | 4239233 | 900 MU-1462          | 4238446 psiE                | psiE | 4238348 | -98  |
| TU-2301 | FWD | 4244834 | 4248459 | 3625 MU-1463         | 4245009 malK;lambB;malM     | malK | 4244807 | -202 |
| TU-2302 | FWD | 4248726 | 4250306 | 1580 MU-1464         | 4248736 yjbI                | yjbI | 4248726 | -10  |
| TU-2303 | FWD | 4250434 | 4251959 | 1525 MU-1465         | 4250505 ubiC;ubiA           | ubiC | 4250529 | 24   |
| TU-2304 | FWD | 4254492 | 4255092 | 600 MU-1466          | 4254480 dgkA                | dgkA | 4254660 | 180  |
| TU-2305 | FWD | 4254492 | 4255092 | 600 MU-1466          | 4254510 dgkA                | dgkA | 4254660 | 150  |
| TU-2306 | FWD | 4255142 | 4255667 | 525 MU-1467          | 4255110 lexA                | lexA | 4255138 | 28   |
| TU-2307 | FWD | 4256117 | 4257117 | 1000 MU-1468         | dinF                        | dinF | 4255765 |      |
| TU-2308 | FWD | 4257242 | 4257442 | 200 MU-1469          | 4257202 yjbJ                | yjbJ | 4257260 | 58   |
| TU-2309 | FWD | 4258344 | 4259329 | 985 MU-1470          | 4258190 yjbL;yjbM           | yjbL | 4258344 | 154  |
| TU-2310 | FWD | 4259567 | 4261117 | 1550 MU-1471         | 4259493 dusA;pspG           | dusA | 4259737 | 244  |
| TU-2311 | FWD | 4259567 | 4261117 | 1550 MU-1471         | 4259617 dusA;pspG           | dusA | 4259737 | 120  |
| TU-2312 | FWD | 4262342 | 4264792 | 2450 MU-1472         | 4262309 dnaB;alr            | dnaB | 4262337 | 28   |
| TU-2313 | FWD | 4265117 | 4266317 | 1200 MU-1473         | 4265105 tyrB                | tyrB | 4265137 | 32   |
| TU-2314 | FWD | 4267417 | 4267942 | 525 MU-1474          | 4267378 aphA                | aphA | 4267437 | 59   |
| TU-2315 | FWD | 4268267 | 4269367 | 1100 MU-1475         | 4268237 yjbQ;yjbR           | yjbQ | 4268261 | 24   |
| TU-2316 | FWD | 4268267 | 4269367 | 1100 MU-1475         | 4268243 yjbQ;yjbR           | yjbQ | 4268261 | 18   |
| TU-2317 | FWD | 4272067 | 4272967 | 900 MU-1476          | 4272113 ssb                 | ssb  | 4272148 | 35   |
| TU-2318 | FWD | 4272067 | 4272967 | 900 MU-1476          | 4272121 ssb                 | ssb  | 4272148 | 27   |
| TU-2319 | FWD | 4272067 | 4272967 | 900 MU-1476          | 4272127 ssb                 | ssb  | 4272148 | 21   |
| TU-2320 | FWD | 4273442 | 4275092 | 1650 MU-1477         | 4273426 yjcC                | yjcC | 4273494 | 68   |

|         |     |         |         |                      |                                            |      |         |     |
|---------|-----|---------|---------|----------------------|--------------------------------------------|------|---------|-----|
| TU-2321 | FWD | 4275492 | 4275942 | 450 MU-1478          | 4275329 soxR                               | soxR | 4275492 | 163 |
| TU-2322 | FWD | 4275492 | 4275942 | 450 MU-1478          | 4275468 soxR                               | soxR | 4275492 | 24  |
| TU-2323 | FWD | 4276367 | 4277842 | 1475 MU-1479         | 4276331 yjcD                               | yjcD | 4276502 | 171 |
| TU-2324 | FWD | 4276367 | 4277842 | 1475 MU-1479         | 4276341 yjcD                               | yjcD | 4276502 | 161 |
| TU-2325 | FWD | 4277967 | 4279592 | 1625 MU-1480         | 4277939 yjcE                               | yjcE | 4278003 | 64  |
| TU-2326 | FWD | 4285787 | 4292162 | 6375 MU-1481         | 4285433 nrfA;nrfB;nrfC;nrfD;nrfE;nrfF;nrfG | nrfA | 4285787 | 354 |
| TU-2327 | FWD | 4285787 | 4292162 | 6375 MU-1481         | 4285560 nrfA;nrfB;nrfC;nrfD;nrfE;nrfF;nrfG | nrfA | 4285787 | 227 |
| TU-2328 | FWD | 4292418 | 4294443 | 2025 MU-1482         | 4292398 gltP                               | gltP | 4292504 | 106 |
| TU-2329 | FWD | 4292418 | 4294443 | 2025 MU-1482         | 4292518 gltP                               | gltP | 4292504 | -14 |
| TU-2330 | FWD | 4304943 | 4305168 | 225 MU-1483          | 4304901 NT                                 |      |         |     |
| TU-2331 | FWD | 4311369 | 4311819 | 450 MU-1484          | 4311281 rpiB                               | rpiB | 4311373 | 92  |
| TU-2332 | FWD | 4311369 | 4311819 | 450 MU-1484          | 4311290 rpiB                               | rpiB | 4311373 | 83  |
| TU-2333 | FWD | 4311369 | 4311819 | 450 MU-1484          | 4311337 rpiB                               | rpiB | 4311373 | 36  |
| TU-2334 | FWD | 4311894 | 4312394 | 500 MU-1485          | 4311869 yjdP                               | yjdP | 4311891 | 22  |
| TU-2335 | FWD | 4325269 | 4327544 | 2275 MU-1486;MU-1487 | 4325082 yjdA;yjcZ                          | yjdA | 4325158 | 76  |
| TU-2336 | FWD | 4325269 | 4327544 | 2275 MU-1486;MU-1487 | 4325135 yjdA;yjcZ                          | yjdA | 4325158 | 23  |
| TU-2337 | FWD | 4327194 | 4327544 | 350 MU-1487          | 4327165 yjcZ                               | yjcZ | 4327383 | 218 |
| TU-2338 | FWD | 4328369 | 4330319 | 1950 MU-1488         | 4328343 proP                               | proP | 4328525 | 182 |
| TU-2339 | FWD | 4328369 | 4330319 | 1950 MU-1488         | 4328375 proP                               | proP | 4328525 | 150 |
| TU-2340 | FWD | 4328369 | 4330319 | 1950 MU-1488         | 4328415 proP                               | proP | 4328525 | 110 |
| TU-2341 | FWD | 4328369 | 4330319 | 1950 MU-1488         | 4328430 proP                               | proP | 4328525 | 95  |
| TU-2342 | FWD | 4339944 | 4342944 | 3000 MU-1489         | 4339847 melA;melB                          | melA | 4339934 | 87  |
| TU-2343 | FWD | 4339944 | 4342944 | 3000 MU-1489         | 4339910 melA;melB                          | melA | 4339934 | 24  |
| TU-2344 | FWD | 4349848 | 4350473 | 625 MU-1490          | 4349836 yjdI;yjdJ                          | yjdI | 4349866 | 30  |
| TU-2345 | FWD | 4350607 | 4351104 | 497 MU-1491          | yjdK;yjdO                                  | yjdK | 4350607 |     |
| TU-2346 | FWD | 4359499 | 4359674 | 175 MU-1492          | 4359542 NT                                 |      |         |     |
| TU-2347 | FWD | 4366174 | 4366349 | 175 MU-1493          | 4366136 NT                                 |      |         |     |
| TU-2348 | FWD | 4366649 | 4367524 | 875 MU-1494          | 4366642 fxsA                               | fxsA | 4366687 | 45  |
| TU-2349 | FWD | 4368599 | 4370724 | 2125 MU-1495;MU-1496 | 4368639 groS;groL                          | groS | 4368711 | 72  |
| TU-2350 | FWD | 4368599 | 4370724 | 2125 MU-1495;MU-1496 | 4368675 groS;groL                          | groS | 4368711 | 36  |
| TU-2351 | FWD | 4368999 | 4370724 | 1725 MU-1496         | 4368639 groL                               | groL | 4369048 | 409 |
| TU-2352 | FWD | 4368999 | 4370724 | 1725 MU-1496         | 4368675 groL                               | groL | 4369048 | 373 |
| TU-2353 | FWD | 4368999 | 4370724 | 1725 MU-1496         | 4368682 groL                               | groL | 4369048 | 366 |
| TU-2354 | FWD | 4368999 | 4370724 | 1725 MU-1496         | 4368715 groL                               | groL | 4369048 | 333 |
| TU-2355 | FWD | 4368999 | 4370724 | 1725 MU-1496         | 4368920 groL                               | groL | 4369048 | 128 |
| TU-2356 | FWD | 4368999 | 4370724 | 1725 MU-1496         | 4368932 groL                               | groL | 4369048 | 116 |
| TU-2357 | FWD | 4368999 | 4370724 | 1725 MU-1496         | 4368981 groL                               | groL | 4369048 | 67  |
| TU-2358 | FWD | 4368999 | 4370724 | 1725 MU-1496         | 4368990 groL                               | groL | 4369048 | 58  |
| TU-2359 | FWD | 4370774 | 4371574 | 800 MU-1497          | 4370784 yjeI                               | yjeI | 4370832 | 48  |
| TU-2360 | FWD | 4373624 | 4374299 | 675 MU-1498          | 4373678 efp                                | efp  | 4373722 | 44  |
| TU-2361 | FWD | 4374349 | 4374474 | 125 MU-1499          | ecnA                                       | ecnA | 4374340 |     |
| TU-2362 | FWD | 4374549 | 4374774 | 225 MU-1500          | 4374533 ecnB                               | ecnB | 4374576 | 43  |
| TU-2363 | FWD | 4374799 | 4375249 | 450 MU-1501          | 4374822 sugE                               | sugE | 4374898 | 76  |
| TU-2364 | FWD | 4380549 | 4381599 | 1050 MU-1502         | 4380464 poxA                               | poxA | 4380666 | 202 |
| TU-2365 | FWD | 4380549 | 4381599 | 1050 MU-1502         | 4380642 poxA                               | poxA | 4380666 | 24  |
| TU-2366 | FWD | 4381862 | 4384041 | 2179 MU-1503         | yjeM;yjeN;yjeO                             | yjeM | 4381862 |     |

|         |     |         |         |                                               |                                                     |      |         |      |
|---------|-----|---------|---------|-----------------------------------------------|-----------------------------------------------------|------|---------|------|
| TU-2367 | FWD | 4389625 | 4390276 | 651 MU-1504                                   | 4389584 orn                                         | orn  | 4389627 | 43   |
| TU-2368 | FWD | 4389625 | 4390276 | 651 MU-1504                                   | 4389592 orn                                         | orn  | 4389627 | 35   |
| TU-2369 | FWD | 4389625 | 4390276 | 651 MU-1504                                   | 4389598 orn                                         | orn  | 4389627 | 29   |
| TU-2370 | FWD | 4390302 | 4390727 | 425 MU-1505                                   | 4390242 glyV;glyX;glyY                              | glyV | 4390383 | 141  |
| TU-2371 | FWD | 4391727 | 4402308 | 10581 MU-1506;MU-1507;MU-1508;MU-1509;MU-1510 | 4391699 yjeF;yjeE;amiB;mutL;miaA;hfq;hflX;hflK;hflC | yjeF | 4392089 | 390  |
| TU-2372 | FWD | 4391727 | 4402308 | 10581 MU-1506;MU-1507;MU-1508;MU-1509;MU-1510 | 4391960 yjeF;yjeE;amiB;mutL;miaA;hfq;hflX;hflK;hflC | yjeF | 4392089 | 129  |
| TU-2373 | FWD | 4391727 | 4402308 | 10581 MU-1506;MU-1507;MU-1508;MU-1509;MU-1510 | 4392051 yjeF;yjeE;amiB;mutL;miaA;hfq;hflX;hflK;hflC | yjeF | 4392089 | 38   |
| TU-2374 | FWD | 4393302 | 4402308 | 9006 MU-1507;MU-1508;MU-1509;MU-1510          | 4393183 yjeE;amiB;mutL;miaA;hfq;hflX;hflK;hflC      | yjeE | 4393608 | 425  |
| TU-2375 | FWD | 4395127 | 4402308 | 7181 MU-1508;MU-1509;MU-1510                  | 4395239 mutL;miaA;hfq;hflX;hflK;hflC                | mutL | 4395435 | 196  |
| TU-2376 | FWD | 4397402 | 4402308 | 4906 MU-1509;MU-1510                          | 4396973 miaA;hfq;hflX;hflK;hflC                     | miaA | 4397275 | 302  |
| TU-2377 | FWD | 4397402 | 4402308 | 4906 MU-1509;MU-1510                          | 4397075 miaA;hfq;hflX;hflK;hflC                     | miaA | 4397275 | 200  |
| TU-2378 | FWD | 4397402 | 4402308 | 4906 MU-1509;MU-1510                          | 4397246 miaA;hfq;hflX;hflK;hflC                     | miaA | 4397275 | 29   |
| TU-2379 | FWD | 4397402 | 4402308 | 4906 MU-1509;MU-1510                          | 4397315 miaA;hfq;hflX;hflK;hflC                     | miaA | 4397275 | -40  |
| TU-2380 | FWD | 4397402 | 4402308 | 4906 MU-1509;MU-1510                          | 4397421 miaA;hfq;hflX;hflK;hflC                     | miaA | 4397275 | -146 |
| TU-2381 | FWD | 4398258 | 4402308 | 4050 MU-1510                                  | 4398256 hfq;hflX;hflK;hflC                          | hfq  | 4398311 | 55   |
| TU-2382 | FWD | 4398258 | 4402308 | 4050 MU-1510                                  | 4398275 hfq;hflX;hflK;hflC                          | hfq  | 4398311 | 36   |
| TU-2383 | FWD | 4402533 | 4402608 | 75 MU-1511                                    | 4402337 yjeT                                        | yjeT | 4402409 | 72   |
| TU-2384 | FWD | 4402533 | 4402608 | 75 MU-1511                                    | 4402348 yjeT                                        | yjeT | 4402409 | 61   |
| TU-2385 | FWD | 4402708 | 4404008 | 1300 MU-1512                                  | 4402683 purA                                        | purA | 4402710 | 27   |
| TU-2386 | FWD | 4402708 | 4404008 | 1300 MU-1512                                  | 4402688 purA                                        | purA | 4402710 | 22   |
| TU-2387 | FWD | 4404058 | 4404133 | 75 MU-1513                                    | 4403905 NT                                          |      |         |      |
| TU-2388 | FWD | 4404058 | 4404133 | 75 MU-1513                                    | 4403916 NT                                          |      |         |      |
| TU-2389 | FWD | 4404183 | 4407933 | 3750 MU-1514;MU-1515                          | 4404175 nsrR;rnr;rlmB                               | nsrR | 4404213 | 38   |
| TU-2390 | FWD | 4407258 | 4407933 | 675 MU-1515                                   | 4407240 rlmB                                        | rlmB | 4407298 | 58   |
| TU-2391 | FWD | 4407258 | 4407933 | 675 MU-1515                                   | 4407246 rlmB                                        | rlmB | 4407298 | 52   |
| TU-2392 | FWD | 4408156 | 4409274 | 1118 MU-1516                                  | 4407962 yjfI;yjfJ                                   | yjfI | 4408156 | 194  |
| TU-2393 | FWD | 4409325 | 4412214 | 2889 MU-1517                                  | 4409333 yjfK;yjfL;yjfM;yjfC                         | yjfK | 4409325 | -8   |
| TU-2394 | FWD | 4412295 | 4413970 | 1675 MU-1518                                  | 4412272 aidB                                        | aidB | 4412298 | 26   |
| TU-2395 | FWD | 4414995 | 4415645 | 650 MU-1519                                   | 4414959 yjfP                                        | yjfP | 4414975 | 16   |
| TU-2396 | FWD | 4418003 | 4422409 | 4406 MU-1520                                  | ulaA;ulaB;ulaC;ulaD;ulaE;ulaF                       | ulaA | 4418003 |      |
| TU-2397 | FWD | 4422920 | 4424570 | 1650 MU-1521                                  | 4423048 rpsF;priB;rpsR;rplI                         | rpsF | 4423141 | 93   |
| TU-2398 | FWD | 4422920 | 4424570 | 1650 MU-1521                                  | 4423050 rpsF;priB;rpsR;rplI                         | rpsF | 4423141 | 91   |
| TU-2399 | FWD | 4425145 | 4425170 | 25 MU-1522                                    | 4424995 NT                                          |      |         |      |
| TU-2400 | FWD | 4425717 | 4426118 | 401 MU-1523                                   | ytfA                                                | ytfA | 4425717 |      |
| TU-2401 | FWD | 4426870 | 4427570 | 700 MU-1524                                   | 4426887 fklB                                        | fklB | 4426958 | 71   |
| TU-2402 | FWD | 4426870 | 4427570 | 700 MU-1524                                   | 4426894 fklB                                        | fklB | 4426958 | 64   |
| TU-2403 | FWD | 4426870 | 4427570 | 700 MU-1524                                   | 4426931 fklB                                        | fklB | 4426958 | 27   |
| TU-2404 | FWD | 4427795 | 4428945 | 1150 MU-1525                                  | 4427835 cycA                                        | cycA | 4427887 | 52   |
| TU-2405 | FWD | 4428970 | 4429870 | 900 MU-1526                                   | 4428853 NT                                          |      |         |      |
| TU-2406 | FWD | 4428970 | 4429870 | 900 MU-1526                                   | 4429034 NT                                          |      |         |      |
| TU-2407 | FWD | 4428970 | 4429870 | 900 MU-1526                                   | 4429105 NT                                          |      |         |      |
| TU-2408 | FWD | 4432145 | 4432845 | 700 MU-1527                                   | 4432106 ytfH                                        | ytfH | 4432136 | 30   |

|         |     |         |         |                      |                             |      |         |     |
|---------|-----|---------|---------|----------------------|-----------------------------|------|---------|-----|
| TU-2409 | FWD | 4434620 | 4435570 | 950 MU-1528          | 4434587 cysQ                | cysQ | 4434778 | 191 |
| TU-2410 | FWD | 4434620 | 4435570 | 950 MU-1528          | 4434590 cysQ                | cysQ | 4434778 | 188 |
| TU-2411 | FWD | 4434620 | 4435570 | 950 MU-1528          | 4434600 cysQ                | cysQ | 4434778 | 178 |
| TU-2412 | FWD | 4435730 | 4436668 | 938 MU-1529          | ytfI                        | ytfI | 4435730 |     |
| TU-2413 | FWD | 4437170 | 4437470 | 300 MU-1530          | 4437157 NT                  |      |         |     |
| TU-2414 | FWD | 4437496 | 4438096 | 600 MU-1531          | 4437534 ytfK                | ytfK | 4437610 | 76  |
| TU-2415 | FWD | 4437496 | 4438096 | 600 MU-1531          | 4437536 ytfK                | ytfK | 4437610 | 74  |
| TU-2416 | FWD | 4437496 | 4438096 | 600 MU-1531          | 4437667 ytfK                | ytfK | 4437610 | -57 |
| TU-2417 | FWD | 4440222 | 4446247 | 6025 MU-1532         | 4440245 ytfM;ytfN;ytfP      | ytfM | 4440405 | 160 |
| TU-2418 | FWD | 4440222 | 4446247 | 6025 MU-1532         | 4440274 ytfM;ytfN;ytfP      | ytfM | 4440405 | 131 |
| TU-2419 | FWD | 4440222 | 4446247 | 6025 MU-1532         | 4440298 ytfM;ytfN;ytfP      | ytfM | 4440405 | 107 |
| TU-2420 | FWD | 4440222 | 4446247 | 6025 MU-1532         | 4440313 ytfM;ytfN;ytfP      | ytfM | 4440405 | 92  |
| TU-2421 | FWD | 4446472 | 4447197 | 725 MU-1533          | 4446453 chpS;chpB           | chpS | 4446470 | 17  |
| TU-2422 | FWD | 4447947 | 4452772 | 4825 MU-1534         | 4447938 ytfQ;ytfR;ytfT;yjff | ytfQ | 4447985 | 47  |
| TU-2423 | FWD | 4447947 | 4452772 | 4825 MU-1534         | 4447946 ytfQ;ytfR;ytfT;yjff | ytfQ | 4447985 | 39  |
| TU-2424 | FWD | 4453797 | 4455297 | 1500 MU-1535         | 4453785 mpl                 | mpl  | 4453808 | 23  |
| TU-2425 | FWD | 4455997 | 4457847 | 1850 MU-1536;MU-1537 | 4455967 pmbA;cybC           | pmbA | 4455982 | 15  |
| TU-2426 | FWD | 4457397 | 4457847 | 450 MU-1537          | 4457596 cybC                | cybC | 4457513 | -83 |
| TU-2427 | FWD | 4465406 | 4468660 | 3254 MU-1538;MU-1539 | 4465385 mgtA;NT             | mgtA | 4465648 | 263 |
| TU-2428 | FWD | 4465406 | 4468660 | 3254 MU-1538;MU-1539 | 4465514 mgtA;NT             | mgtA | 4465648 | 134 |
| TU-2429 | FWD | 4465406 | 4468660 | 3254 MU-1538;MU-1539 | 4465552 mgtA;NT             | mgtA | 4465648 | 96  |
| TU-2430 | FWD | 4467510 | 4468660 | 1150 MU-1539         | 4467531 NT                  |      |         |     |
| TU-2431 | FWD | 4472160 | 4472785 | 625 MU-1540          | 4472119 yjgJ                | yjgJ | 4472147 | 28  |
| TU-2432 | FWD | 4472160 | 4472785 | 625 MU-1540          | 4472123 yjgJ                | yjgJ | 4472147 | 24  |
| TU-2433 | FWD | 4472885 | 4473360 | 475 MU-1541          | 4472852 yjgK                | yjgK | 4472885 | 33  |
| TU-2434 | FWD | 4473460 | 4475274 | 1814 MU-1542         | 4473418 yjgL                | yjgL | 4473460 | 42  |
| TU-2435 | FWD | 4475235 | 4475410 | 175 MU-1543          | 4475183 NT                  |      |         |     |
| TU-2436 | FWD | 4476435 | 4477010 | 575 MU-1544          | 4476468 rraB                | rraB | 4476496 | 28  |
| TU-2437 | FWD | 4477753 | 4478949 | 1196 MU-1545         | yjgN                        | yjgN | 4477753 |     |
| TU-2438 | FWD | 4484013 | 4486338 | 2325 MU-1546         | 4484153 yjgP;yjgQ           | yjgP | 4484241 | 88  |
| TU-2439 | FWD | 4492763 | 4493163 | 400 MU-1547          | 4492620 idnK                | idnK | 4492646 | 26  |
| TU-2440 | FWD | 4494438 | 4494513 | 75 MU-1548           | 4494428 leuX                | leuX | 4494428 | 0   |
| TU-2441 | FWD | 4494563 | 4495888 | 1325 MU-1549         | 4494472 intB                | intB | 4494698 | 226 |
| TU-2442 | FWD | 4496038 | 4498088 | 2050 MU-1550         | 4496128 insC;insD           | insC | 4496295 | 167 |
| TU-2443 | FWD | 4499283 | 4499612 | 329 MU-1551          | yjgZ                        | yjgZ | 4499283 |     |
| TU-2444 | FWD | 4502438 | 4504163 | 1725 MU-1552         | 4501862 yjhB;yjhC;ythA      | yjhB | 4502081 | 219 |
| TU-2445 | FWD | 4502438 | 4504163 | 1725 MU-1552         | 4501907 yjhB;yjhC;ythA      | yjhB | 4502081 | 174 |
| TU-2446 | FWD | 4504988 | 4505388 | 400 MU-1553          | yjhE;insO                   | yjhE | 4504884 |     |
| TU-2447 | FWD | 4505538 | 4506163 | 625 MU-1554          | 4505417 NT                  |      |         |     |
| TU-2448 | FWD | 4507063 | 4507888 | 825 MU-1555          | 4506976 insO;yjhV           | insO | 4507032 | 56  |
| TU-2449 | FWD | 4516395 | 4517295 | 900 MU-1556          | 4516534 insA;insB           | insA | 4516550 | 16  |
| TU-2450 | FWD | 4518845 | 4519845 | 1000 MU-1557         | 4518966 NT                  |      |         |     |
| TU-2451 | FWD | 4524020 | 4524345 | 325 MU-1558          | 4524136 NT                  |      |         |     |
| TU-2452 | FWD | 4526020 | 4526445 | 425 MU-1559          | 4525999 ryjB                | ryjB | 4526000 | 1   |
| TU-2453 | FWD | 4532145 | 4533145 | 1000 MU-1560         | 4532242 NT                  |      |         |     |
| TU-2454 | FWD | 4532814 | 4534054 | 1240 MU-1561         | yjhR                        | yjhR | 4532814 |     |

|         |     |         |         |                                      |                                            |      |         |       |  |
|---------|-----|---------|---------|--------------------------------------|--------------------------------------------|------|---------|-------|--|
| TU-2455 | FWD | 4534470 | 4534670 | 200 MU-1562                          | 4534426 NT                                 |      |         |       |  |
| TU-2456 | FWD | 4538745 | 4539520 | 775 MU-1563                          | 4538709 fimB                               | fimB | 4538980 | 271   |  |
| TU-2457 | FWD | 4539995 | 4540545 | 550 MU-1564                          | 4540073 fimE                               | fimE | 4540060 | -13   |  |
| TU-2458 | FWD | 4541046 | 4547721 | 6675 MU-1565;MU-1566;MU-1567;MU-1568 | 4541107 fimA;fimI;fimC;fimD;fimF;fimG;fimH | fimA | 4541138 | 31    |  |
| TU-2459 | FWD | 4542546 | 4547721 | 5175 MU-1566;MU-1567;MU-1568         | 4542527 fimC;fimD;fimF;fimG;fimH           | fimC | 4542327 | -200  |  |
| TU-2460 | FWD | 4544046 | 4547721 | 3675 MU-1567;MU-1568                 | 4544032 fimD;fimF;fimG;fimH                | fimD | 4543119 | -913  |  |
| TU-2461 | FWD | 4544046 | 4547721 | 3675 MU-1567;MU-1568                 | 4544203 fimD;fimF;fimG;fimH                | fimD | 4543119 | -1084 |  |
| TU-2462 | FWD | 4546971 | 4547721 | 750 MU-1568                          | 4546952 fimH                               | fimH | 4546831 | -121  |  |
| TU-2463 | FWD | 4548821 | 4548946 | 125 MU-1569                          | 4548770 NT                                 |      |         |       |  |
| TU-2464 | FWD | 4549471 | 4552371 | 2900 MU-1570                         | 4549544 uxuA;uxuB                          | uxuA | 4549659 | 115   |  |
| TU-2465 | FWD | 4552521 | 4553346 | 825 MU-1571                          | 4552503 uxuR                               | uxuR | 4552599 | 96    |  |
| TU-2466 | FWD | 4552521 | 4553346 | 825 MU-1571                          | 4552566 uxuR                               | uxuR | 4552599 | 33    |  |
| TU-2467 | FWD | 4554621 | 4555371 | 750 MU-1572                          | 4554785 yjiD                               | yjiD | 4555016 | 231   |  |
| TU-2468 | FWD | 4558872 | 4559522 | 650 MU-1573                          | kptA                                       | kptA | 4558953 |       |  |
| TU-2469 | FWD | 4561397 | 4561723 | 326 MU-1574                          | 4561417 NT                                 |      |         |       |  |
| TU-2470 | FWD | 4567021 | 4567941 | 920 MU-1575                          | yjiP                                       | yjiP | 4567021 |       |  |
| TU-2471 | FWD | 4567681 | 4568231 | 550 MU-1576                          | 4567522 NT                                 |      |         |       |  |
| TU-2472 | FWD | 4567681 | 4568231 | 550 MU-1576                          | 4567539 NT                                 |      |         |       |  |
| TU-2473 | FWD | 4567681 | 4568231 | 550 MU-1576                          | 4567626 NT                                 |      |         |       |  |
| TU-2474 | FWD | 4567681 | 4568231 | 550 MU-1576                          | 4567630 NT                                 |      |         |       |  |
| TU-2475 | FWD | 4569756 | 4569856 | 100 MU-1577                          | yjiS                                       | yjiS | 4569774 |       |  |
| TU-2476 | FWD | 4570219 | 4574994 | 4775 MU-1578                         | 4570182 yjiT;yjiV                          | yjiT | 4570437 | 255   |  |
| TU-2477 | FWD | 4570219 | 4574994 | 4775 MU-1578                         | 4570222 yjiT;yjiV                          | yjiT | 4570437 | 215   |  |
| TU-2478 | FWD | 4570219 | 4574994 | 4775 MU-1578                         | 4570371 yjiT;yjiV                          | yjiT | 4570437 | 66    |  |
| TU-2479 | FWD | 4570219 | 4574994 | 4775 MU-1578                         | 4570385 yjiT;yjiV                          | yjiT | 4570437 | 52    |  |
| TU-2480 | FWD | 4570219 | 4574994 | 4775 MU-1578                         | 4570406 yjiT;yjiV                          | yjiT | 4570437 | 31    |  |
| TU-2481 | FWD | 4576569 | 4576694 | 125 MU-1579                          | 4576539 NT                                 |      |         |       |  |
| TU-2482 | FWD | 4577895 | 4578045 | 150 MU-1580                          | 4577858 symR                               | symR | 4577858 | 0     |  |
| TU-2483 | FWD | 4584974 | 4585949 | 975 MU-1581                          | 4584938 mrr                                | mrr  | 4584972 | 34    |  |
| TU-2484 | FWD | 4584974 | 4585949 | 975 MU-1581                          | 4584955 mrr                                | mrr  | 4584972 | 17    |  |
| TU-2485 | FWD | 4589749 | 4591149 | 1400 MU-1582                         | 4589656 tsr                                | tsr  | 4589680 | 24    |  |
| TU-2486 | FWD | 4594049 | 4594924 | 875 MU-1583                          | 4594170 yjjN                               | yjjN | 4594022 | -148  |  |
| TU-2487 | FWD | 4601500 | 4602860 | 1360 MU-1584                         | yjjQ;bgIJ                                  | yjjQ | 4601500 |       |  |
| TU-2488 | FWD | 4603749 | 4604849 | 1100 MU-1585                         | 4603800 yjjZ                               | yjjZ | 4603827 | 27    |  |
| TU-2489 | FWD | 4605824 | 4609024 | 3200 MU-1586                         | 4605804 holD;rimI;yjjG;prfC                | holD | 4605826 | 22    |  |
| TU-2490 | FWD | 4609174 | 4610374 | 1200 MU-1587                         | 4609175 osmY;ytjA                          | osmY | 4609419 | 244   |  |
| TU-2491 | FWD | 4609174 | 4610374 | 1200 MU-1587                         | 4609257 osmY;ytjA                          | osmY | 4609419 | 162   |  |
| TU-2492 | FWD | 4609174 | 4610374 | 1200 MU-1587                         | 4609269 osmY;ytjA                          | osmY | 4609419 | 150   |  |
| TU-2493 | FWD | 4609174 | 4610374 | 1200 MU-1587                         | 4609356 osmY;ytjA                          | osmY | 4609419 | 63    |  |
| TU-2494 | FWD | 4609174 | 4610374 | 1200 MU-1587                         | 4609391 osmY;ytjA                          | osmY | 4609419 | 28    |  |
| TU-2495 | FWD | 4610424 | 4612649 | 2225 MU-1588                         | 4610406 yjjU;yjjV                          | yjjU | 4610434 | 28    |  |
| TU-2496 | FWD | 4614224 | 4615274 | 1050 MU-1589                         | 4614203 NT                                 |      |         |       |  |
| TU-2497 | FWD | 4615324 | 4619599 | 4275 MU-1590;MU-1591                 | 4615133 deoC;deoA;deoB;deoD                | deoC | 4615346 | 213   |  |
| TU-2498 | FWD | 4615324 | 4619599 | 4275 MU-1590;MU-1591                 | 4615243 deoC;deoA;deoB;deoD                | deoC | 4615346 | 103   |  |
| TU-2499 | FWD | 4615324 | 4619599 | 4275 MU-1590;MU-1591                 | 4615251 deoC;deoA;deoB;deoD                | deoC | 4615346 | 95    |  |

|         |     |         |         |                                      |                                |      |         |     |
|---------|-----|---------|---------|--------------------------------------|--------------------------------|------|---------|-----|
| TU-2500 | FWD | 4615324 | 4619599 | 4275 MU-1590;MU-1591                 | 4615300 deoC;deoA;deoB;deoD    | deoC | 4615346 | 46  |
| TU-2501 | FWD | 4615324 | 4619599 | 4275 MU-1590;MU-1591                 | 4615316 deoC;deoA;deoB;deoD    | deoC | 4615346 | 30  |
| TU-2502 | FWD | 4617474 | 4619599 | 2125 MU-1591                         | 4617590 deoB;deoD              | deoB | 4617626 | 36  |
| TU-2503 | FWD | 4617474 | 4619599 | 2125 MU-1591                         | 4617600 deoB;deoD              | deoB | 4617626 | 26  |
| TU-2504 | FWD | 4619799 | 4620949 | 1150 MU-1592                         | 4619764 yjjJ                   | yjjJ | 4619792 | 28  |
| TU-2505 | FWD | 4622799 | 4626849 | 4050 MU-1593;MU-1594                 | 4622879 serB;radA;nadR         | serB | 4622918 | 39  |
| TU-2506 | FWD | 4625249 | 4626849 | 1600 MU-1594                         | 4625326 nadR                   | nadR | 4625338 | 12  |
| TU-2507 | FWD | 4628724 | 4630699 | 1975 MU-1595                         | 4628705 slt                    | slt  | 4628756 | 51  |
| TU-2508 | FWD | 4628724 | 4630699 | 1975 MU-1595                         | 4628733 slt                    | slt  | 4628756 | 23  |
| TU-2509 | FWD | 4630749 | 4631274 | 525 MU-1596                          | 4630721 trpR                   | trpR | 4630783 | 62  |
| TU-2510 | FWD | 4630749 | 4631274 | 525 MU-1596                          | 4630727 trpR                   | trpR | 4630783 | 56  |
| TU-2511 | FWD | 4631724 | 4632474 | 750 MU-1597                          | 4631778 ytjC                   | ytjC | 4631820 | 42  |
| TU-2512 | FWD | 4631724 | 4632474 | 750 MU-1597                          | 4631788 ytjC                   | ytjC | 4631820 | 32  |
| TU-2513 | FWD | 4633299 | 4635724 | 2425 MU-1598                         | 4633345 creA;creB;creC         | creA | 4633544 | 199 |
| TU-2514 | FWD | 4633299 | 4635724 | 2425 MU-1598                         | 4633366 creA;creB;creC         | creA | 4633544 | 178 |
| TU-2515 | FWD | 4633299 | 4635724 | 2425 MU-1598                         | 4633418 creA;creB;creC         | creA | 4633544 | 126 |
| TU-2516 | FWD | 4636324 | 4637449 | 1125 MU-1599                         | 4636134 creD                   | creD | 4636201 | 67  |
| TU-2517 | FWD | 4638493 | 4638543 | 50 MU-1600                           | yjjY                           | yjjY | 4638425 |     |
| TU-2518 | FWD | 4638743 | 4639618 | 875 MU-1601                          | 4638666 yjtD                   | yjtD | 4638965 | 299 |
| TU-2519 | REV | 5450    | 6450    | 1000 MU-1602                         | 6482 yaaA                      | yaaA | 5683    | 23  |
| TU-2520 | REV | 6800    | 8175    | 1375 MU-1603                         | 8053 yaaJ                      | yaaJ | 6529    | 94  |
| TU-2521 | REV | 9975    | 10475   | 500 MU-1604                          | 10430 yaaH                     | yaaH | 9928    | -64 |
| TU-2522 | REV | 10826   | 11226   | 400 MU-1605                          | yaaW;yaaI                      | yaaI | 11382   |     |
| TU-2523 | REV | 16201   | 17176   | 975 MU-1606                          | 17146 hokC;mokC                | mokC | 16751   | 186 |
| TU-2524 | REV | 19826   | 20651   | 825 MU-1607                          | 20599 insB;insA                | insA | 20233   | 91  |
| TU-2525 | REV | 20801   | 21201   | 400 MU-1608                          | 21112 rpsT                     | rpsT | 20815   | 34  |
| TU-2526 | REV | 20801   | 21201   | 400 MU-1608                          | 21118 rpsT                     | rpsT | 20815   | 40  |
| TU-2527 | REV | 20801   | 21201   | 400 MU-1608                          | 21159 rpsT                     | rpsT | 20815   | 81  |
| TU-2528 | REV | 20801   | 21201   | 400 MU-1608                          | 21207 rpsT                     | rpsT | 20815   | 129 |
| TU-2529 | REV | 34759   | 36409   | 1650 MU-1609                         | 36281 caiE;caiD                | caiD | 35377   | 11  |
| TU-2530 | REV | 34759   | 36409   | 1650 MU-1609                         | 36358 caiE;caiD                | caiD | 35377   | 88  |
| TU-2531 | REV | 34759   | 36409   | 1650 MU-1609                         | 36430 caiE;caiD                | caiD | 35377   | 160 |
| TU-2532 | REV | 34759   | 36409   | 1650 MU-1609                         | 36489 caiE;caiD                | caiD | 35377   | 219 |
| TU-2533 | REV | 34759   | 37684   | 2925 MU-1609;MU-1610                 | 37942 caiE;caiD;caiC           | caiC | 36271   | 103 |
| TU-2534 | REV | 34759   | 39909   | 5150 MU-1609;MU-1610;MU-1611         | 39918 caiE;caiD;caiC;caiB      | caiB | 37898   | 803 |
| TU-2535 | REV | 34759   | 41931   | 7172 MU-1609;MU-1610;MU-1611;MU-1612 | caiE;caiD;caiC;caiB;caiA;caiT  | caiT | 40417   |     |
| TU-2536 | REV | 50384   | 52034   | 1650 MU-1613                         | 52034 apaH;apaG                | apaG | 51229   | 428 |
| TU-2537 | REV | 50384   | 52034   | 1650 MU-1613                         | 52077 apaH;apaG                | apaG | 51229   | 471 |
| TU-2538 | REV | 50384   | 52034   | 1650 MU-1613                         | 52084 apaH;apaG                | apaG | 51229   | 478 |
| TU-2539 | REV | 50384   | 52659   | 2275 MU-1613;MU-1614                 | 52595 apaH;apaG;ksgA           | ksgA | 51609   | 165 |
| TU-2540 | REV | 50384   | 52659   | 2275 MU-1613;MU-1614                 | 52654 apaH;apaG;ksgA           | ksgA | 51609   | 224 |
| TU-2541 | REV | 50384   | 55284   | 4900 MU-1613;MU-1614;MU-1615         | 55387 apaH;apaG;ksgA;pdxA;surA | surA | 53416   | 685 |
| TU-2542 | REV | 50384   | 57384   | 7000 MU-1613;MU-1614;MU-1615;MU-1616 | 57156 imp                      | imp  | 54755   | 47  |



|         |     |        |        |                                      |                                |      |        |     |
|---------|-----|--------|--------|--------------------------------------|--------------------------------|------|--------|-----|
| TU-2543 | REV | 50384  | 57384  | 7000 MU-1613;MU-1614;MU-1615;MU-1616 | 57241 imp                      | imp  | 54755  | 132 |
| TU-2544 | REV | 50384  | 57384  | 7000 MU-1613;MU-1614;MU-1615;MU-1616 | 57253 imp                      | imp  | 54755  | 144 |
| TU-2545 | REV | 59659  | 63559  | 3900 MU-1617                         | 63357 rluA;hepA                | hepA | 60358  | 93  |
| TU-2546 | REV | 59659  | 63559  | 3900 MU-1617                         | 63468 rluA;hepA                | hepA | 60358  | 204 |
| TU-2547 | REV | 59659  | 63559  | 3900 MU-1617                         | 63531 rluA;hepA                | hepA | 60358  | 267 |
| TU-2548 | REV | 59659  | 63559  | 3900 MU-1617                         | 63588 rluA;hepA                | hepA | 60358  | 324 |
| TU-2549 | REV | 63734  | 65784  | 2050 MU-1618                         | 65803 polB                     | polB | 63429  | 23  |
| TU-2550 | REV | 66409  | 70034  | 3625 MU-1619                         | 70077 araD;araA;araB           | araB | 68348  | 29  |
| TU-2551 | REV | 72084  | 75859  | 3775 MU-1620                         | 75664 thiQ;thiP;tbpA;sroA      | sroA | 75516  | 56  |
| TU-2552 | REV | 72084  | 77359  | 5275 MU-1620;MU-1621                 | 77336 thiQ;thiP;tbpA;sroA;sgrR | sgrR | 75644  | 37  |
| TU-2553 | REV | 78734  | 83759  | 5025 MU-1622                         | 83728 leuD;leuC;leuB;leuA;leuL | leuL | 83622  | 20  |
| TU-2554 | REV | 78734  | 83759  | 5025 MU-1622                         | 83735 leuD;leuC;leuB;leuA;leuL | leuL | 83622  | 27  |
| TU-2555 | REV | 111359 | 112759 | 1400 MU-1623                         | 112699 yacG;yacF               | yacF | 111856 | 100 |
| TU-2556 | REV | 111359 | 112759 | 1400 MU-1623                         | 112703 yacG;yacF               | yacF | 111856 | 104 |
| TU-2557 | REV | 111359 | 112759 | 1400 MU-1623                         | 112757 yacG;yacF               | yacF | 111856 | 158 |
| TU-2558 | REV | 111359 | 113284 | 1925 MU-1623;MU-1624                 | 113322 yacG;yacF;coaE          | coaE | 112599 | 103 |
| TU-2559 | REV | 114459 | 117009 | 2550 MU-1625                         | 117052 hofC;hofB               | hofB | 115714 | -47 |
| TU-2560 | REV | 117109 | 117549 | 440 MU-1626                          | ppdD                           | ppdD | 117109 |     |
| TU-2561 | REV | 117784 | 118659 | 875 MU-1627                          | 118679 nadC                    | nadC | 117752 | 34  |
| TU-2562 | REV | 120034 | 121759 | 1725 MU-1628                         | 121647 aroP                    | aroP | 120178 | 96  |
| TU-2563 | REV | 120034 | 121759 | 1725 MU-1628                         | 121676 aroP                    | aroP | 120178 | 125 |
| TU-2564 | REV | 122697 | 122857 | 160 MU-1629                          | tp2                            | tp2  | 122697 |     |
| TU-2565 | REV | 129407 | 131260 | 1853 MU-1630                         | yacH                           | yacH | 129407 |     |
| TU-2566 | REV | 134796 | 136546 | 1750 MU-1631                         | 136550 speD;speE               | speE | 135598 | 86  |
| TU-2567 | REV | 136596 | 136946 | 350 MU-1632                          | 136939 yacC                    | yacC | 136570 | 22  |
| TU-2568 | REV | 136596 | 136946 | 350 MU-1632                          | 136942 yacC                    | yacC | 136570 | 25  |
| TU-2569 | REV | 138696 | 141221 | 2525 MU-1633                         | 141254 gcd                     | gcd  | 138835 | 29  |
| TU-2570 | REV | 138696 | 141221 | 2525 MU-1633                         | 141263 gcd                     | gcd  | 138835 | 38  |
| TU-2571 | REV | 141996 | 142721 | 725 MU-1634                          | 142694 can                     | can  | 142008 | 24  |
| TU-2572 | REV | 141996 | 142721 | 725 MU-1634                          | 142703 can                     | can  | 142008 | 33  |
| TU-2573 | REV | 146250 | 146725 | 475 MU-1635                          | 146751 panD                    | panD | 146314 | 57  |
| TU-2574 | REV | 146250 | 146725 | 475 MU-1635                          | 146754 panD                    | panD | 146314 | 60  |
| TU-2575 | REV | 147975 | 149601 | 1626 MU-1636                         | 149617 panC;panB               | panB | 148807 | 16  |
| TU-2576 | REV | 147975 | 149601 | 1626 MU-1636                         | 149630 panC;panB               | panB | 148807 | 29  |
| TU-2577 | REV | 149715 | 150953 | 1238 MU-1637                         | yadC                           | yadC | 149715 |     |
| TU-2578 | REV | 151003 | 152231 | 1228 MU-1638                         | yadK;yadL                      | yadL | 151626 |     |
| TU-2579 | REV | 152243 | 155426 | 3183 MU-1639                         | yadM;htrE                      | htrE | 152829 |     |
| TU-2580 | REV | 155461 | 156201 | 740 MU-1640                          | ecpD                           | ecpD | 155461 |     |
| TU-2581 | REV | 156299 | 156883 | 584 MU-1641                          | yadN                           | yadN | 156299 |     |
| TU-2582 | REV | 157351 | 159201 | 1850 MU-1642                         | 159154 folK;pcnB               | pcnB | 157729 | 28  |
| TU-2583 | REV | 157351 | 159201 | 1850 MU-1642                         | 159166 folK;pcnB               | pcnB | 157729 | 40  |
| TU-2584 | REV | 157351 | 159201 | 1850 MU-1642                         | 159171 folK;pcnB               | pcnB | 157729 | 45  |
| TU-2585 | REV | 159251 | 160751 | 1500 MU-1643                         | 160651 yadB;dksA               | dksA | 160149 | 47  |
| TU-2586 | REV | 159251 | 160751 | 1500 MU-1643                         | 160657 yadB;dksA               | dksA | 160149 | 53  |

|         |     |        |        |              |                                    |      |        |     |
|---------|-----|--------|--------|--------------|------------------------------------|------|--------|-----|
| TU-2587 | REV | 159251 | 160751 | 1500 MU-1643 | 160760 yadB;dksA                   | dksA | 160149 | 156 |
| TU-2588 | REV | 160776 | 162026 | 1250 MU-1644 | 162053 sfsA;ligT                   | ligT | 161501 | 22  |
| TU-2589 | REV | 167026 | 167401 | 375 MU-1645  | 167416 NT                          |      |        |     |
| TU-2590 | REV | 173326 | 174976 | 1650 MU-1646 | 174907 hemL                        | hemL | 173602 | 25  |
| TU-2591 | REV | 173326 | 174976 | 1650 MU-1646 | 174992 hemL                        | hemL | 173602 | 110 |
| TU-2592 | REV | 176951 | 179151 | 2200 MU-1647 | 179181 yadS;btuF;mtn               | mtn  | 178455 | 28  |
| TU-2593 | REV | 183607 | 184207 | 600 MU-1648  | 184122 yaeH                        | yaeH | 183709 | 27  |
| TU-2594 | REV | 183607 | 184207 | 600 MU-1648  | 184124 yaeH                        | yaeH | 183709 | 29  |
| TU-2595 | REV | 184257 | 185069 | 812 MU-1649  | yaeI                               | yaeI | 184257 |     |
| TU-2596 | REV | 184932 | 186032 | 1100 MU-1650 | 185972 dapD                        | dapD | 185123 | 25  |
| TU-2597 | REV | 184932 | 186032 | 1100 MU-1650 | 185976 dapD                        | dapD | 185123 | 29  |
| TU-2598 | REV | 184932 | 186032 | 1100 MU-1650 | 186073 dapD                        | dapD | 185123 | 126 |
| TU-2599 | REV | 186057 | 188657 | 2600 MU-1651 | glnD                               | glnD | 185978 |     |
| TU-2600 | REV | 188707 | 189707 | 1000 MU-1652 | 189532 map;glnD                    | glnD | 185978 | 882 |
| TU-2601 | REV | 188707 | 189707 | 1000 MU-1652 | 189545 map;glnD                    | glnD | 185978 | 895 |
| TU-2602 | REV | 188707 | 189707 | 1000 MU-1652 | 189553 map;glnD                    | glnD | 185978 | 903 |
| TU-2603 | REV | 213557 | 214257 | 700 MU-1653  | 214163 rof;yaeP                    | yaeP | 213925 | 38  |
| TU-2604 | REV | 216179 | 217003 | 824 MU-1654  | yaeF                               | yaeF | 216179 |     |
| TU-2605 | REV | 217157 | 218832 | 1675 MU-1655 | 218831 proS                        | proS | 217057 | 56  |
| TU-2606 | REV | 218857 | 220032 | 1175 MU-1656 | 220022 yaeB;rcsF                   | rcsF | 219591 | 27  |
| TU-2607 | REV | 220082 | 222682 | 2600 MU-1657 | 222714 metQ;metI;metN              | metN | 221614 | 69  |
| TU-2608 | REV | 229962 | 230862 | 900 MU-1658  | 230906 yafC                        | yafC | 229967 | 25  |
| TU-2609 | REV | 232612 | 234062 | 1450 MU-1659 | 233980 mltD                        | mltD | 232597 | 25  |
| TU-2610 | REV | 234137 | 234863 | 726 MU-1660  | 234821 gloB                        | gloB | 234027 | 39  |
| TU-2611 | REV | 235288 | 236013 | 725 MU-1661  | 236044 rnhA                        | rnhA | 235535 | 42  |
| TU-2612 | REV | 238257 | 239102 | 845 MU-1662  | ykfM;yafU                          | yafU | 238746 |     |
| TU-2613 | REV | 239213 | 240188 | 975 MU-1663  | 240216 yafV                        | yafV | 239419 | 27  |
| TU-2614 | REV | 240863 | 243488 | 2625 MU-1664 | 243346 fadE                        | fadE | 240859 | 43  |
| TU-2615 | REV | 245063 | 245888 | 825 MU-1665  | 245825 yafK                        | yafK | 245065 | 20  |
| TU-2616 | REV | 245938 | 246563 | 625 MU-1666  | 246533 yafQ;dinJ                   | dinJ | 246242 | 31  |
| TU-2617 | REV | 248363 | 250088 | 1725 MU-1667 | lfhA                               | lfhA | 248358 |     |
| TU-2618 | REV | 254263 | 255788 | 1525 MU-1668 | 255770 pepD                        | pepD | 254259 | 54  |
| TU-2619 | REV | 254263 | 255788 | 1525 MU-1668 | 255776 pepD                        | pepD | 254259 | 60  |
| TU-2620 | REV | 254263 | 255788 | 1525 MU-1668 | 255807 pepD                        | pepD | 254259 | 91  |
| TU-2621 | REV | 258269 | 259324 | 1055 MU-1669 | 259389 phoE                        | phoE | 258269 | 65  |
| TU-2622 | REV | 261739 | 262364 | 625 MU-1670  | 262302 NT                          |      |        |     |
| TU-2623 | REV | 262374 | 264767 | 2393 MU-1671 | ykfN;ykfI;yafW;ykfH;ykfG;yafX;ykff | ykff | 264528 |     |
| TU-2624 | REV | 264839 | 265439 | 600 MU-1672  | 265294 ykfb                        | ykfb | 264844 | -17 |
| TU-2625 | REV | 265334 | 266191 | 857 MU-1673  | yafY;ykfL;ykfK                     | ykfK | 266000 |     |
| TU-2626 | REV | 266408 | 267229 | 821 MU-1674  | yafZ                               | yafZ | 266408 |     |
| TU-2627 | REV | 267339 | 268239 | 900 MU-1675  | 268252 ykfA                        | ykfA | 267321 | 68  |
| TU-2628 | REV | 268513 | 269406 | 893 MU-1676  | perR                               | perR | 268513 |     |
| TU-2629 | REV | 273189 | 274364 | 1175 MU-1677 | insH                               | insH | 273325 |     |
| TU-2630 | REV | 277089 | 278414 | 1325 MU-1678 | afuC;afuB                          | afuB | 278038 |     |
| TU-2631 | REV | 278464 | 279289 | 825 MU-1679  | 279354 insB;insA                   | insA | 278824 | 255 |
| TU-2632 | REV | 278464 | 279289 | 825 MU-1679  | 279384 insB;insA                   | insA | 278824 | 285 |

|         |     |        |        |                      |        |                          |      |        |      |
|---------|-----|--------|--------|----------------------|--------|--------------------------|------|--------|------|
| TU-2633 | REV | 279314 | 280014 | 700 MU-1680          | 279978 | insX;yagB                | yagB | 279651 | 19   |
| TU-2634 | REV | 280053 | 281207 | 1154 MU-1681         |        | yagA                     | yagA | 280053 |      |
| TU-2635 | REV | 287515 | 288440 | 925 MU-1682          | 288412 | yagI                     | yagI | 287628 | 26   |
| TU-2636 | REV | 288490 | 289540 | 1050 MU-1683         | 289564 | argF                     | argF | 288525 | 35   |
| TU-2637 | REV | 289890 | 290590 | 700 MU-1684          | 290655 | insB;insA                | insA | 290295 | 85   |
| TU-2638 | REV | 291546 | 292172 | 626 MU-1685          | 292170 | yagK                     | yagK | 291546 | -2   |
| TU-2639 | REV | 292444 | 294023 | 1579 MU-1686         |        | yagL;yagM                | yagM | 293169 |      |
| TU-2640 | REV | 294440 | 294815 | 375 MU-1687          | 294844 | yagN                     | yagN | 294363 | 41   |
| TU-2641 | REV | 294940 | 296290 | 1350 MU-1688         | 296372 | intF                     | intF | 294920 | 52   |
| TU-2642 | REV | 296690 | 301840 | 5150 MU-1689         | 301863 | yagP;yagQ;yagR;yagS;yagT | yagT | 301108 | 66   |
| TU-2643 | REV | 303140 | 303490 | 350 MU-1690          | 303428 | ykgJ                     | ykgJ | 303077 | 22   |
| TU-2644 | REV | 303140 | 303490 | 350 MU-1690          | 303438 | ykgJ                     | ykgJ | 303077 | 32   |
| TU-2645 | REV | 303665 | 305590 | 1925 MU-1691         | 305654 | yagV                     | yagV | 303719 | 1225 |
| TU-2646 | REV | 303665 | 309915 | 6250 MU-1691;MU-1692 | 309944 | yagV;yagW;yagX;matC;matB | matB | 309308 | 49   |
| TU-2647 | REV | 309970 | 310560 | 590 MU-1693          |        | matA                     | matA | 309970 |      |
| TU-2648 | REV | 311393 | 311993 | 600 MU-1694          | 312027 | ykgO;ykgM                | ykgM | 311738 | 26   |
| TU-2649 | REV | 312393 | 312468 | 75 MU-1695           | 312456 | NT                       |      |        |      |
| TU-2650 | REV | 312940 | 313029 | 89 MU-1696           |        | ykgP                     | ykgP | 312940 |      |
| TU-2651 | REV | 315293 | 315668 | 375 MU-1697          | 315721 | NT                       |      |        |      |
| TU-2652 | REV | 315293 | 315668 | 375 MU-1697          | 315750 | NT                       |      |        |      |
| TU-2653 | REV | 315710 | 316393 | 683 MU-1698          |        | ykgA                     | ykgA | 315710 |      |
| TU-2654 | REV | 316950 | 317791 | 841 MU-1699          |        | ykgB;ykgI                | ykgI | 317555 |      |
| TU-2655 | REV | 318268 | 319193 | 925 MU-1700          | 319257 | ykgC                     | ykgC | 317900 | 32   |
| TU-2656 | REV | 323920 | 324588 | 668 MU-1701          |        | ykgH                     | ykgH | 323920 |      |
| TU-2657 | REV | 324793 | 328568 | 3775 MU-1702         | 328585 | betA;betB;betI           | betI | 327971 | 27   |
| TU-2658 | REV | 332893 | 333668 | 775 MU-1703          | 333688 | yahB                     | yahB | 332725 | 31   |
| TU-2659 | REV | 333749 | 334246 | 497 MU-1704          |        | yahC                     | yahC | 333749 |      |
| TU-2660 | REV | 344818 | 345493 | 675 MU-1705          | 345550 | yahN                     | yahN | 344890 | -11  |
| TU-2661 | REV | 347318 | 347643 | 325 MU-1706          | 347693 | prpR                     | prpR | 346081 | 26   |
| TU-2662 | REV | 356718 | 357893 | 1175 MU-1707         | 357932 | cynR                     | cynR | 357015 | 18   |
| TU-2663 | REV | 356718 | 357893 | 1175 MU-1707         | 357938 | cynR                     | cynR | 357015 | 24   |
| TU-2664 | REV | 360473 | 361084 | 611 MU-1708          |        | lacA                     | lacA | 360473 |      |
| TU-2665 | REV | 361150 | 362403 | 1253 MU-1709         |        | lacA;lacY                | lacY | 361150 |      |
| TU-2666 | REV | 362455 | 365529 | 3074 MU-1710         |        | lacA;lacY;lacZ           | lacZ | 362455 |      |
| TU-2667 | REV | 365702 | 367727 | 2025 MU-1711         | 367754 | lacI;mhpR                | mhpR | 366811 | 110  |
| TU-2668 | REV | 376552 | 377602 | 1050 MU-1712         | 377685 | frmB                     | frmB | 376759 | 93   |
| TU-2669 | REV | 376552 | 379129 | 2577 MU-1712;MU-1713 | 379124 | frmB;frmA;frmR           | frmR | 378830 | 19   |
| TU-2670 | REV | 379356 | 380506 | 1150 MU-1714         | 380428 | yaiO;yaiX                | yaiX | 380068 | -55  |
| TU-2671 | REV | 381556 | 381781 | 225 MU-1715          |        | NT                       |      |        |      |
| TU-2672 | REV | 381815 | 383159 | 1344 MU-1716         | 383207 | yaiX;yaiP                | yaiP | 381963 | 48   |
| TU-2673 | REV | 383283 | 383840 | 557 MU-1717          | 384055 | yaiS                     | yaiS | 383283 | 215  |
| TU-2674 | REV | 388036 | 388961 | 925 MU-1718          | 388978 | hemB                     | hemB | 387977 | 27   |
| TU-2675 | REV | 390711 | 392586 | 1875 MU-1719         | 392607 | insF;insE                | insE | 391826 | 473  |
| TU-2676 | REV | 390711 | 392586 | 1875 MU-1719         | 392668 | insF;insE                | insE | 391826 | 534  |
| TU-2677 | REV | 394461 | 395561 | 1100 MU-1720         | 395543 | ampH                     | ampH | 394354 | 32   |
| TU-2678 | REV | 394461 | 395561 | 1100 MU-1720         | 395587 | ampH                     | ampH | 394354 | 76   |

|         |     |        |        |                      |                                 |      |        |      |
|---------|-----|--------|--------|----------------------|---------------------------------|------|--------|------|
| TU-2679 | REV | 398279 | 398554 | 275 MU-1721          | 398533 yaiY                     | yaiY | 398249 | -24  |
| TU-2680 | REV | 399054 | 400329 | 1275 MU-1722         | 400176 ddiA                     | ddiA | 399053 | 29   |
| TU-2681 | REV | 402529 | 402879 | 350 MU-1723          | 402878 NT                       |      |        |      |
| TU-2682 | REV | 402529 | 402879 | 350 MU-1723          | 402928 NT                       |      |        |      |
| TU-2683 | REV | 404055 | 404880 | 825 MU-1724          | 404905 proC                     | proC | 404059 | 37   |
| TU-2684 | REV | 404055 | 404880 | 825 MU-1724          | 404910 proC                     | proC | 404059 | 42   |
| TU-2685 | REV | 407530 | 407755 | 225 MU-1725          | 407786 NT                       |      |        |      |
| TU-2686 | REV | 408255 | 409255 | 1000 MU-1726         | 409274 rdgC                     | rdgC | 408332 | 31   |
| TU-2687 | REV | 410330 | 411731 | 1401 MU-1727         | 411748 araJ                     | araJ | 410521 | 43   |
| TU-2688 | REV | 411806 | 416181 | 4375 MU-1728         | 416200 sbcC;sbcD                | sbcD | 414974 | 24   |
| TU-2689 | REV | 418281 | 420281 | 2000 MU-1729         | 420346 NT                       |      |        |      |
| TU-2690 | REV | 423531 | 424331 | 800 MU-1730          | 424218 acpH                     | acpH | 423561 | 76   |
| TU-2691 | REV | 430284 | 431387 | 1103 MU-1731         | 431276 tsx                      | tsx  | 430353 | 39   |
| TU-2692 | REV | 430284 | 431387 | 1103 MU-1731         | 431302 tsx                      | tsx  | 430353 | 65   |
| TU-2693 | REV | 430284 | 431387 | 1103 MU-1731         | 431315 tsx                      | tsx  | 430353 | 78   |
| TU-2694 | REV | 430284 | 431387 | 1103 MU-1731         | 431348 tsx                      | tsx  | 430353 | 111  |
| TU-2695 | REV | 431587 | 432062 | 475 MU-1732          | 432100 yajI                     | yajI | 431536 | 25   |
| TU-2696 | REV | 436087 | 437587 | 1500 MU-1733         | 437508 yajO                     | yajO | 436385 | 149  |
| TU-2697 | REV | 437612 | 439622 | 2010 MU-1734         | 439624 dxs                      | dxs  | 437539 | 223  |
| TU-2698 | REV | 437612 | 439622 | 2010 MU-1734         | 439634 dxs                      | dxs  | 437539 | 233  |
| TU-2699 | REV | 437612 | 441162 | 3550 MU-1734;MU-1735 | 440597 dxs;ispA;xseB            | xseB | 440325 | 30   |
| TU-2700 | REV | 442137 | 443762 | 1625 MU-1736         | 443779 yajL;panE                | panE | 442828 | 40   |
| TU-2701 | REV | 442137 | 443762 | 1625 MU-1736         | 443784 yajL;panE                | panE | 442828 | 45   |
| TU-2702 | REV | 444412 | 445687 | 1275 MU-1737         | 445520 yajR                     | yajR | 444526 | -370 |
| TU-2703 | REV | 445787 | 450912 | 5125 MU-1738         | 450858 cyoE;cyoD;cyoC;cyoB;cyoA | cyoA | 449887 | 24   |
| TU-2704 | REV | 445787 | 450912 | 5125 MU-1738         | 450873 cyoE;cyoD;cyoC;cyoB;cyoA | cyoA | 449887 | 39   |
| TU-2705 | REV | 445787 | 450912 | 5125 MU-1738         | 450877 cyoE;cyoD;cyoC;cyoB;cyoA | cyoA | 449887 | 43   |
| TU-2706 | REV | 451437 | 453412 | 1975 MU-1739         | 453415 ampG;yajG                | yajG | 452813 | 24   |
| TU-2707 | REV | 451437 | 453412 | 1975 MU-1739         | 453421 ampG;yajG                | yajG | 452813 | 30   |
| TU-2708 | REV | 451437 | 453412 | 1975 MU-1739         | 453433 ampG;yajG                | yajG | 452813 | 42   |
| TU-2709 | REV | 457952 | 458008 | 56 MU-1740           | sraA                            | sraA | 457952 |      |
| TU-2710 | REV | 464105 | 464755 | 650 MU-1741          | 464796 queC                     | queC | 464076 | 25   |
| TU-2711 | REV | 464980 | 466530 | 1550 MU-1742         | 466565 ybaE                     | ybaE | 464836 | 29   |
| TU-2712 | REV | 464980 | 466530 | 1550 MU-1742         | 466570 ybaE                     | ybaE | 464836 | 34   |
| TU-2713 | REV | 473655 | 474405 | 750 MU-1743          | 474425 tesB                     | tesB | 473525 | 40   |
| TU-2714 | REV | 474955 | 475505 | 550 MU-1744          | 475536 ybaZ                     | ybaZ | 475206 | -59  |
| TU-2715 | REV | 476355 | 477955 | 1600 MU-1745         | 477866 ylaB                     | ylaB | 476291 | 25   |
| TU-2716 | REV | 478005 | 478605 | 600 MU-1746          | 478512 ylaC                     | ylaC | 478005 | 37   |
| TU-2717 | REV | 478655 | 479280 | 625 MU-1747          | maa                             | maa  | 478591 |      |
| TU-2718 | REV | 479305 | 480083 | 778 MU-1748          | 480019 hha;ybaJ                 | ybaJ | 479558 | 87   |
| TU-2719 | REV | 480508 | 484858 | 4350 MU-1749         | 484888 acrB;acrA                | acrA | 483650 | 45   |
| TU-2720 | REV | 480508 | 484858 | 4350 MU-1749         | 484914 acrB;acrA                | acrA | 483650 | 71   |
| TU-2721 | REV | 480508 | 484858 | 4350 MU-1749         | 484922 acrB;acrA                | acrA | 483650 | 79   |
| TU-2722 | REV | 480508 | 484858 | 4350 MU-1749         | 484959 acrB;acrA                | acrA | 483650 | 116  |
| TU-2723 | REV | 484883 | 485283 | 400 MU-1750          | 485310 NT                       |      |        |      |
| TU-2724 | REV | 489133 | 490133 | 1000 MU-1751         | 490112 ybaM;priC                | priC | 489509 | 76   |

|         |     |        |        |              |                  |      |        |     |
|---------|-----|--------|--------|--------------|------------------|------|--------|-----|
| TU-2725 | REV | 490208 | 490633 | 425 MU-1752  | 490663 NT        |      |        |     |
| TU-2726 | REV | 498558 | 499437 | 879 MU-1753  | aes              | aes  | 498238 |     |
| TU-2727 | REV | 500662 | 502487 | 1825 MU-1754 | 502520 ybaL      | ybaL | 500786 | 58  |
| TU-2728 | REV | 500662 | 502487 | 1825 MU-1754 | 502564 ybaL      | ybaL | 500786 | 102 |
| TU-2729 | REV | 502937 | 503912 | 975 MU-1755  | 503954 fsr       | fsr  | 502700 | 34  |
| TU-2730 | REV | 502937 | 503912 | 975 MU-1755  | 504035 fsr       | fsr  | 502700 | 115 |
| TU-2731 | REV | 502937 | 503912 | 975 MU-1755  | 504044 fsr       | fsr  | 502700 | 124 |
| TU-2732 | REV | 505512 | 506389 | 877 MU-1756  | 506369 ybaK      | ybaK | 505827 | 63  |
| TU-2733 | REV | 505512 | 506389 | 877 MU-1756  | 506441 ybaK      | ybaK | 505827 | 135 |
| TU-2734 | REV | 505512 | 506389 | 877 MU-1756  | 506463 ybaK      | ybaK | 505827 | 157 |
| TU-2735 | REV | 506539 | 507339 | 800 MU-1757  | 507321 ybaP      | ybaP | 506510 | 17  |
| TU-2736 | REV | 507814 | 510614 | 2800 MU-1758 | 510619 copA      | copA | 508099 | 16  |
| TU-2737 | REV | 507814 | 510614 | 2800 MU-1758 | 510635 copA      | copA | 508099 | 32  |
| TU-2738 | REV | 513489 | 515014 | 1525 MU-1759 | 515049 ybbJ;qmcA | qmcA | 514080 | 52  |
| TU-2739 | REV | 516364 | 517489 | 1125 MU-1760 | 517529 ybbN      | ybbN | 516649 | 26  |
| TU-2740 | REV | 516364 | 517489 | 1125 MU-1760 | 517578 ybbN      | ybbN | 516649 | 75  |
| TU-2741 | REV | 516364 | 517489 | 1125 MU-1760 | 517583 ybbN      | ybbN | 516649 | 80  |
| TU-2742 | REV | 517514 | 519039 | 1525 MU-1761 | 519021 ybbO;tesA | tesA | 518363 | 32  |
| TU-2743 | REV | 517514 | 519039 | 1525 MU-1761 | 519157 ybbO;tesA | tesA | 518363 | 168 |
| TU-2744 | REV | 528839 | 530589 | 1750 MU-1762 | 530470 ylbG;ybbB | ybbB | 529356 | 20  |
| TU-2745 | REV | 528839 | 530589 | 1750 MU-1762 | 530477 ylbG;ybbB | ybbB | 529356 | 27  |
| TU-2746 | REV | 530519 | 531445 | 926 MU-1763  | allS             | allS | 530519 |     |
| TU-2747 | REV | 542489 | 544214 | 1725 MU-1764 | ylbA;allC        | allC | 543281 |     |
| TU-2748 | REV | 544538 | 545587 | 1049 MU-1765 | allD             | allD | 544538 |     |
| TU-2749 | REV | 550514 | 552339 | 1825 MU-1766 | 552365 purK;purE | purE | 551814 | 42  |
| TU-2750 | REV | 552364 | 553764 | 1400 MU-1767 | 553683 lpxH;ppiB | ppiB | 553166 | 23  |
| TU-2751 | REV | 552364 | 553764 | 1400 MU-1767 | 553687 lpxH;ppiB | ppiB | 553166 | 27  |
| TU-2752 | REV | 552364 | 553764 | 1400 MU-1767 | 553713 lpxH;ppiB | ppiB | 553166 | 53  |
| TU-2753 | REV | 552364 | 553764 | 1400 MU-1767 | 553728 lpxH;ppiB | ppiB | 553166 | 68  |
| TU-2754 | REV | 552364 | 553764 | 1400 MU-1767 | 553781 lpxH;ppiB | ppiB | 553166 | 121 |
| TU-2755 | REV | 555414 | 555539 | 125 MU-1768  | 555697 ybcI      | ybcI | 555255 | -79 |
| TU-2756 | REV | 555914 | 556989 | 1075 MU-1769 | 556998 ybcJ;folD | folD | 556098 | 34  |
| TU-2757 | REV | 555914 | 556989 | 1075 MU-1769 | 557004 ybcJ;folD | folD | 556098 | 40  |
| TU-2758 | REV | 563071 | 563703 | 632 MU-1770  | fimZ             | fimZ | 563071 |     |
| TU-2759 | REV | 564139 | 565214 | 1075 MU-1771 | intD             | intD | 564038 |     |
| TU-2760 | REV | 565081 | 565599 | 518 MU-1772  | xisD;exoD        | exoD | 565321 |     |
| TU-2761 | REV | 566839 | 567239 | 400 MU-1773  | 567403 NT        |      |        |     |
| TU-2762 | REV | 575009 | 576048 | 1039 MU-1774 | nmpC             | nmpC | 573752 |     |
| TU-2763 | REV | 573816 | 574941 | 1125 MU-1775 | insH             | insH | 573960 |     |
| TU-2764 | REV | 574966 | 576066 | 1100 MU-1776 | 576080 nmpC      | nmpC | 575009 | 32  |
| TU-2765 | REV | 574966 | 576066 | 1100 MU-1776 | 576093 nmpC      | nmpC | 575009 | 45  |
| TU-2766 | REV | 577574 | 578124 | 550 MU-1777  | 578131 borD      | borD | 577823 | 15  |
| TU-2767 | REV | 577574 | 578124 | 550 MU-1777  | 578144 borD      | borD | 577823 | 28  |
| TU-2768 | REV | 578407 | 578817 | 410 MU-1778  | ybcV             | ybcV | 578407 |     |
| TU-2769 | REV | 579553 | 579653 | 100 MU-1779  | ylcI             | ylcI | 579474 |     |
| TU-2770 | REV | 580590 | 580840 | 250 MU-1780  | 580786 NT        |      |        |     |

|         |     |        |        |                      |                                    |      |        |      |
|---------|-----|--------|--------|----------------------|------------------------------------|------|--------|------|
| TU-2771 | REV | 581375 | 582029 | 654 MU-1781          | 582167 ybcY                        | ybcY | 581375 | 138  |
| TU-2772 | REV | 583765 | 584865 | 1100 MU-1782         | 584873 ompT                        | ompT | 583903 | 17   |
| TU-2773 | REV | 583765 | 584865 | 1100 MU-1782         | 584881 ompT                        | ompT | 583903 | 25   |
| TU-2774 | REV | 583765 | 584865 | 1100 MU-1782         | 584887 ompT                        | ompT | 583903 | 31   |
| TU-2775 | REV | 585365 | 586140 | 775 MU-1783          | envY                               | envY | 585370 |      |
| TU-2776 | REV | 586565 | 590465 | 3900 MU-1784         | 590318 ybcH;nfrA                   | nfrA | 587205 | 141  |
| TU-2777 | REV | 586565 | 590465 | 3900 MU-1784         | 590483 ybcH;nfrA                   | nfrA | 587205 | 306  |
| TU-2778 | REV | 586565 | 592390 | 5825 MU-1784;MU-1785 | 592554 ybcH;nfrA;nfrB              | nfrB | 590164 | 153  |
| TU-2779 | REV | 586565 | 592390 | 5825 MU-1784;MU-1785 | 592574 ybcH;nfrA;nfrB              | nfrB | 590164 | 173  |
| TU-2780 | REV | 592665 | 594645 | 1980 MU-1786         | 594681 cusS;cusR                   | cusR | 593983 | 15   |
| TU-2781 | REV | 596220 | 596320 | 100 MU-1787          | 596419 NT                          |      |        |      |
| TU-2782 | REV | 602745 | 603870 | 1125 MU-1788         | 603879 ybdG                        | ybdG | 602639 | -7   |
| TU-2783 | REV | 604020 | 604645 | 625 MU-1789          | 604668 nfsB                        | nfsB | 603994 | 21   |
| TU-2784 | REV | 604020 | 604645 | 625 MU-1789          | 604676 nfsB                        | nfsB | 603994 | 29   |
| TU-2785 | REV | 604670 | 605520 | 850 MU-1790          | 605447 ybdF;ybdJ                   | ybdJ | 605174 | 25   |
| TU-2786 | REV | 605645 | 606595 | 950 MU-1791          | 606485 ybdK                        | ybdK | 605488 | -121 |
| TU-2787 | REV | 606920 | 606945 | 25 MU-1792           | 607015 NT                          |      |        |      |
| TU-2788 | REV | 608670 | 611820 | 3150 MU-1793         | 611838 entD;fepA                   | fepA | 609477 | 121  |
| TU-2789 | REV | 618671 | 621421 | 2750 MU-1794         | 621457 fepC;fepG;fepD              | fepD | 620408 | 45   |
| TU-2790 | REV | 622671 | 624046 | 1375 MU-1795         | 623950 fepB                        | fepB | 622777 | 217  |
| TU-2791 | REV | 631246 | 631521 | 175 MU-1796          | 631486 NT                          |      |        |      |
| TU-2792 | REV | 631596 | 632721 | 1125 MU-1797         | 632746 ybdH                        | ybdH | 631612 | 46   |
| TU-2793 | REV | 633970 | 635792 | 1822 MU-1798         | ybdM;ybdN                          | ybdN | 634572 |      |
| TU-2794 | REV | 635939 | 636841 | 902 MU-1799          | ybdO                               | ybdO | 635939 |      |
| TU-2795 | REV | 637071 | 637921 | 850 MU-1800          | 637825 dsbG                        | dsbG | 637050 | 29   |
| TU-2796 | REV | 640674 | 641099 | 425 MU-1801          | 641120 uspG                        | uspG | 640662 | 30   |
| TU-2797 | REV | 640674 | 641099 | 425 MU-1801          | 641126 uspG                        | uspG | 640662 | 36   |
| TU-2798 | REV | 642856 | 643381 | 525 MU-1802          | 643277 rnk                         | rnk  | 642780 | 87   |
| TU-2799 | REV | 642856 | 643381 | 525 MU-1802          | 643288 rnk                         | rnk  | 642780 | 98   |
| TU-2800 | REV | 642856 | 643381 | 525 MU-1802          | 643364 rnk                         | rnk  | 642780 | 174  |
| TU-2801 | REV | 643431 | 644231 | 800 MU-1803          | 644257 rna                         | rna  | 643420 | 31   |
| TU-2802 | REV | 644340 | 651079 | 6739 MU-1804         | citT;citG;citX;citF;citE;citD;citC | citC | 650021 |      |
| TU-2803 | REV | 654099 | 655199 | 1100 MU-1805         | dcuC                               | dcuC | 653806 |      |
| TU-2804 | REV | 656799 | 657174 | 375 MU-1806          | 657190 crcB                        | crcB | 656778 | 29   |
| TU-2805 | REV | 658499 | 659474 | 975 MU-1807          | 659474 lipA                        | lipA | 658474 | 35   |
| TU-2806 | REV | 658499 | 659474 | 975 MU-1807          | 659525 lipA                        | lipA | 658474 | 86   |
| TU-2807 | REV | 659648 | 660601 | 953 MU-1808          | ybeF                               | ybeF | 659648 |      |
| TU-2808 | REV | 660924 | 661499 | 575 MU-1809          | 661533 lipB                        | lipB | 660860 | 32   |
| TU-2809 | REV | 661549 | 661874 | 325 MU-1810          | 661929 ybeD                        | ybeD | 661602 | 64   |
| TU-2810 | REV | 661899 | 663130 | 1231 MU-1811         | 663224 dacA                        | dacA | 661975 | 38   |
| TU-2811 | REV | 661899 | 663130 | 1231 MU-1811         | 663372 dacA                        | dacA | 661975 | 186  |
| TU-2812 | REV | 663155 | 664555 | 1400 MU-1812         | 664555 rlpA                        | rlpA | 663325 | 142  |
| TU-2813 | REV | 663155 | 664555 | 1400 MU-1812         | 664684 rlpA                        | rlpA | 663325 | 271  |
| TU-2814 | REV | 663155 | 668280 | 5125 MU-1812;MU-1813 | 668291 rlpA;mrdB;mrdA;ybeA;ybeB    | ybeB | 667942 | 32   |
| TU-2815 | REV | 663155 | 668280 | 5125 MU-1812;MU-1813 | 668296 rlpA;mrdB;mrdA;ybeA;ybeB    | ybeB | 667942 | 37   |
| TU-2816 | REV | 663155 | 668280 | 5125 MU-1812;MU-1813 | 668430 rlpA;mrdB;mrdA;ybeA;ybeB    | ybeB | 667942 | 171  |

|         |     |        |        |                              |                                           |      |        |     |
|---------|-----|--------|--------|------------------------------|-------------------------------------------|------|--------|-----|
| TU-2817 | REV | 668305 | 670230 | 1925 MU-1814                 | 670132 cobC;nadD                          | nadD | 669154 | 337 |
| TU-2818 | REV | 668305 | 674180 | 5875 MU-1814;MU-1815         | 674060 cobC;nadD;holA;rlpB;leuS           | leuS | 671424 | 54  |
| TU-2819 | REV | 668305 | 674180 | 5875 MU-1814;MU-1815         | 674068 cobC;nadD;holA;rlpB;leuS           | leuS | 671424 | 62  |
| TU-2820 | REV | 675080 | 675705 | 625 MU-1816                  | 675831 ybeQ                               | ybeQ | 674793 | 61  |
| TU-2821 | REV | 678075 | 678629 | 554 MU-1817                  | ybeT                                      | ybeT | 678075 |     |
| TU-2822 | REV | 680980 | 682130 | 1150 MU-1818                 | hscC                                      | hscC | 680946 |     |
| TU-2823 | REV | 682705 | 683655 | 950 MU-1819                  | 683662 rihA                               | rihA | 682700 | 27  |
| TU-2824 | REV | 683780 | 685905 | 2125 MU-1820                 | 686066 gltL;gltK;gltJ;sroC                | sroC | 685904 | 0   |
| TU-2825 | REV | 683780 | 685905 | 2125 MU-1820                 | 686081 gltL;gltK;gltJ;sroC                | sroC | 685904 | 15  |
| TU-2826 | REV | 683780 | 687105 | 3325 MU-1820;MU-1821         | 687035 gltL;gltK;gltJ;sroC;gltI           | gltI | 686062 | 65  |
| TU-2827 | REV | 683780 | 687105 | 3325 MU-1820;MU-1821         | 687066 gltL;gltK;gltJ;sroC;gltI           | gltI | 686062 | 96  |
| TU-2828 | REV | 683780 | 687105 | 3325 MU-1820;MU-1821         | 687077 gltL;gltK;gltJ;sroC;gltI           | gltI | 686062 | 107 |
| TU-2829 | REV | 687130 | 688405 | 1275 MU-1822                 | 688559 insH                               | insH | 687220 | 323 |
| TU-2830 | REV | 688655 | 691130 | 2475 MU-1823                 | 691100 lnt;ybeX                           | ybeX | 690129 | 93  |
| TU-2831 | REV | 688655 | 692705 | 4050 MU-1823;MU-1824         | 692652 lnt;ybeX;ybeY;ybeZ                 | ybeZ | 691561 | 51  |
| TU-2832 | REV | 688655 | 692705 | 4050 MU-1823;MU-1824         | 692659 lnt;ybeX;ybeY;ybeZ                 | ybeZ | 691561 | 58  |
| TU-2833 | REV | 688655 | 692705 | 4050 MU-1823;MU-1824         | 692692 lnt;ybeX;ybeY;ybeZ                 | ybeZ | 691561 | 91  |
| TU-2834 | REV | 692755 | 694205 | 1450 MU-1825                 | 694214 miaB                               | miaB | 692754 | 36  |
| TU-2835 | REV | 695655 | 696030 | 375 MU-1826                  | 696016 glnX;glnV;metU;glnW                | glnW | 695979 | -37 |
| TU-2836 | REV | 695655 | 696530 | 875 MU-1826;MU-1827          | 696389 glnX;glnV;metU;glnW;glnU;leuW;metT | metT | 696280 | 33  |
| TU-2837 | REV | 696555 | 698430 | 1875 MU-1828                 | 698445 asnB                               | asnB | 696736 | 45  |
| TU-2838 | REV | 698655 | 699580 | 925 MU-1829                  | 699578 nagD                               | nagD | 698797 | 29  |
| TU-2839 | REV | 698655 | 700980 | 2325 MU-1829;MU-1830         | 700877 nagD;nagC                          | nagC | 699597 | 60  |
| TU-2840 | REV | 698655 | 700980 | 2325 MU-1829;MU-1830         | 701088 nagD;nagC                          | nagC | 699597 | 271 |
| TU-2841 | REV | 698655 | 702905 | 4250 MU-1829;MU-1830;MU-1831 | 702929 nagD;nagC;nagA;nagB                | nagB | 702034 | 95  |
| TU-2842 | REV | 709430 | 710105 | 675 MU-1832                  | 709939 fur;uof                            | uof  | 709862 | -9  |
| TU-2843 | REV | 709430 | 710105 | 675 MU-1832                  | 709945 fur;uof                            | uof  | 709862 | -3  |
| TU-2844 | REV | 709430 | 710105 | 675 MU-1832                  | 709975 fur;uof                            | uof  | 709862 | 27  |
| TU-2845 | REV | 709430 | 710105 | 675 MU-1832                  | 710003 fur;uof                            | uof  | 709862 | 55  |
| TU-2846 | REV | 709430 | 710105 | 675 MU-1832                  | 710051 fur;uof                            | uof  | 709862 | 103 |
| TU-2847 | REV | 710155 | 710780 | 625 MU-1833                  | 710719 fldA                               | fldA | 710158 | 31  |
| TU-2848 | REV | 710155 | 710780 | 625 MU-1833                  | 710744 fldA                               | fldA | 710158 | 56  |
| TU-2849 | REV | 710155 | 710780 | 625 MU-1833                  | 710819 fldA                               | fldA | 710158 | 131 |
| TU-2850 | REV | 710830 | 712030 | 1200 MU-1834                 | 712066 ybfE;ybfF                          | ybfF | 711261 | 41  |
| TU-2851 | REV | 715170 | 715820 | 650 MU-1835                  | ybfG                                      | ybfG | 715170 |     |
| TU-2852 | REV | 715944 | 716093 | 149 MU-1836                  | ybfI                                      | ybfI | 715944 |     |
| TU-2853 | REV | 716005 | 717680 | 1675 MU-1837                 | 717567 potE                               | potE | 716169 | 79  |
| TU-2854 | REV | 717485 | 719683 | 2198 MU-1838                 | speF                                      | speF | 717485 |     |
| TU-2855 | REV | 720280 | 721055 | 775 MU-1839                  | 721191 kdpE                               | kdpE | 720279 | 235 |
| TU-2856 | REV | 720280 | 721055 | 775 MU-1839                  | 721208 kdpE                               | kdpE | 720279 | 252 |
| TU-2857 | REV | 720280 | 723930 | 3650 MU-1839;MU-1840         | kdpE;kdpD                                 | kdpD | 720953 |     |
| TU-2858 | REV | 723630 | 728044 | 4414 MU-1841                 | kdpC;kdpB;kdpA;kdpF                       | kdpF | 727955 |     |
| TU-2859 | REV | 740358 | 741858 | 1500 MU-1842                 | 741892 ybgH                               | ybgH | 740298 | 113 |
| TU-2860 | REV | 746283 | 747008 | 725 MU-1843                  | 747026 abrB                               | abrB | 745946 | 34  |
| TU-2861 | REV | 747144 | 752018 | 4874 MU-1844                 | ybgO;ybgP;ybgQ;ybgD                       | ybgD | 751452 |     |
| TU-2862 | REV | 752133 | 752208 | 75 MU-1845                   | 752400 NT                                 |      |        |     |

|         |     |        |        |                      |                                 |  |      |            |
|---------|-----|--------|--------|----------------------|---------------------------------|--|------|------------|
| TU-2863 | REV | 752133 | 752208 | 75 MU-1845           | 752404 NT                       |  |      |            |
| TU-2864 | REV | 752383 | 754008 | 1625 MU-1846         | 753894 gltA                     |  | gltA | 752408 203 |
| TU-2865 | REV | 752383 | 754008 | 1625 MU-1846         | 753897 gltA                     |  | gltA | 752408 206 |
| TU-2866 | REV | 752383 | 754008 | 1625 MU-1846         | 753901 gltA                     |  | gltA | 752408 210 |
| TU-2867 | REV | 752383 | 754008 | 1625 MU-1846         | 753904 gltA                     |  | gltA | 752408 213 |
| TU-2868 | REV | 752383 | 754008 | 1625 MU-1846         | 753919 gltA                     |  | gltA | 752408 228 |
| TU-2869 | REV | 752383 | 754008 | 1625 MU-1846         | 753923 gltA                     |  | gltA | 752408 232 |
| TU-2870 | REV | 752383 | 754008 | 1625 MU-1846         | 753995 gltA                     |  | gltA | 752408 304 |
| TU-2871 | REV | 752383 | 754008 | 1625 MU-1846         | 754018 gltA                     |  | gltA | 752408 327 |
| TU-2872 | REV | 764383 | 765083 | 700 MU-1847          | 765122 mngR                     |  | mngR | 764376 24  |
| TU-2873 | REV | 783258 | 784033 | 775 MU-1848          | 784070 zitB                     |  | zitB | 783105 24  |
| TU-2874 | REV | 784158 | 784658 | 500 MU-1849          | 784607 ybgS                     |  | ybgS | 784160 67  |
| TU-2875 | REV | 784158 | 784658 | 500 MU-1849          | 784663 ybgS                     |  | ybgS | 784160 123 |
| TU-2876 | REV | 784158 | 784658 | 500 MU-1849          | 784685 ybgS                     |  | ybgS | 784160 145 |
| TU-2877 | REV | 786058 | 786933 | 875 MU-1850          | 786855 gpmA                     |  | gpmA | 786066 37  |
| TU-2878 | REV | 786058 | 786933 | 875 MU-1850          | 786893 gpmA                     |  | gpmA | 786066 75  |
| TU-2879 | REV | 786058 | 786933 | 875 MU-1850          | 786905 gpmA                     |  | gpmA | 786066 87  |
| TU-2880 | REV | 787058 | 788233 | 1175 MU-1851         | 788097 galM                     |  | galM | 787020 37  |
| TU-2881 | REV | 787058 | 788233 | 1175 MU-1851         | 788124 galM                     |  | galM | 787020 64  |
| TU-2882 | REV | 788258 | 791283 | 3025 MU-1852         | 791309 galK;galT;galE           |  | galE | 790262 31  |
| TU-2883 | REV | 791558 | 793033 | 1475 MU-1853         | 793037 modF                     |  | modF | 791539 26  |
| TU-2884 | REV | 791558 | 793858 | 2300 MU-1853;MU-1854 | 793885 modF;modE                |  | modE | 793079 18  |
| TU-2885 | REV | 796858 | 797658 | 800 MU-1855          | 797681 ybhA                     |  | ybhA | 796836 27  |
| TU-2886 | REV | 798845 | 799798 | 953 MU-1856          | ybhD                            |  | ybhD | 798845     |
| TU-2887 | REV | 802533 | 802658 | 125 MU-1857          | NT                              |  |      |            |
| TU-2888 | REV | 804883 | 806533 | 1650 MU-1858         | 806537 ybhC                     |  | ybhC | 805221 33  |
| TU-2889 | REV | 804883 | 806533 | 1650 MU-1858         | 806546 ybhC                     |  | ybhC | 805221 42  |
| TU-2890 | REV | 806704 | 807204 | 500 MU-1859          | 807152 ybhB                     |  | ybhB | 806656 20  |
| TU-2891 | REV | 806704 | 808479 | 1775 MU-1859;MU-1860 | 808513 ybhB;bioA                |  | bioA | 807191 33  |
| TU-2892 | REV | 812337 | 812474 | 137 MU-1861          | ybhU                            |  | ybhU | 812337     |
| TU-2893 | REV | 814888 | 815865 | 977 MU-1862          | 815894 ybhK                     |  | ybhK | 814962 24  |
| TU-2894 | REV | 820940 | 823715 | 2775 MU-1863         | 823747 ybhN;ybhO;ybhP           |  | ybhP | 822959 27  |
| TU-2895 | REV | 824240 | 828140 | 3900 MU-1864         | 828189 ybhR;ybhS;ybhF           |  | ybhF | 826468 -15 |
| TU-2896 | REV | 824240 | 828140 | 3900 MU-1864         | 828206 ybhR;ybhS;ybhF           |  | ybhF | 826468 2   |
| TU-2897 | REV | 824240 | 829865 | 5625 MU-1864;MU-1865 | 829893 ybhR;ybhS;ybhF;ybhG;ybiH |  | ybiH | 829195 27  |
| TU-2898 | REV | 831290 | 831940 | 650 MU-1866          | ybiA                            |  | ybiA | 831691     |
| TU-2899 | REV | 836696 | 837171 | 475 MU-1867          | 837198 ybiJ                     |  | ybiJ | 836888 50  |
| TU-2900 | REV | 837221 | 837671 | 450 MU-1868          | 837699 ybiI                     |  | ybiI | 837413 20  |
| TU-2901 | REV | 837221 | 837671 | 450 MU-1868          | 837705 ybiI                     |  | ybiI | 837413 26  |
| TU-2902 | REV | 837746 | 839096 | 1350 MU-1869         | 839139 ybiX                     |  | ybiX | 837753 709 |
| TU-2903 | REV | 837746 | 840846 | 3100 MU-1869;MU-1870 | ybiX;fiu                        |  | fiu  | 838472     |
| TU-2904 | REV | 841021 | 841296 | 275 MU-1871          | ybiM                            |  | ybiM | 841019     |
| TU-2905 | REV | 842522 | 844697 | 2175 MU-1872         | 844733 ybiO                     |  | ybiO | 842478 30  |
| TU-2906 | REV | 844822 | 847397 | 2575 MU-1873         | 847270 glnQ;glnP;glnH           |  | glnH | 846481 43  |
| TU-2907 | REV | 844822 | 847397 | 2575 MU-1873         | 847360 glnQ;glnP;glnH           |  | glnH | 846481 133 |
| TU-2908 | REV | 847597 | 848147 | 550 MU-1874          | 848160 dps                      |  | dps  | 847631 26  |



|         |     |        |        |                      |                            |      |        |     |
|---------|-----|--------|--------|----------------------|----------------------------|------|--------|-----|
| TU-2909 | REV | 847597 | 848147 | 550 MU-1874          | 848167 dps                 | dps  | 847631 | 33  |
| TU-2910 | REV | 847597 | 848147 | 550 MU-1874          | 848173 dps                 | dps  | 847631 | 39  |
| TU-2911 | REV | 848472 | 849372 | 900 MU-1875          | 849354 rhtA                | rhtA | 848433 | 34  |
| TU-2912 | REV | 850347 | 851897 | 1550 MU-1876         | ybiP                       | ybiP | 850237 |     |
| TU-2913 | REV | 851972 | 852247 | 275 MU-1877          | 852270 rybA                | rybA | 852175 | 7   |
| TU-2914 | REV | 854097 | 854997 | 900 MU-1878          | 855021 ybiS                | ybiS | 854047 | 54  |
| TU-2915 | REV | 857122 | 859250 | 2128 MU-1879         | 859272 ybiU;ybiV           | ybiV | 858436 | 21  |
| TU-2916 | REV | 859397 | 862761 | 3364 MU-1880         | ybiW;ybiY                  | ybiY | 861835 |     |
| TU-2917 | REV | 863625 | 865650 | 2025 MU-1881         | 865611 moeB;moeA           | moeA | 864352 | 24  |
| TU-2918 | REV | 875950 | 877275 | 1325 MU-1882         | 877292 yliG                | yliG | 875933 | 34  |
| TU-2919 | REV | 879075 | 879725 | 650 MU-1883          | 879742 yliJ                | yliJ | 879077 | 39  |
| TU-2920 | REV | 881235 | 882710 | 1475 MU-1884         | 882682 deoR;ybjG           | ybjG | 882015 | 71  |
| TU-2921 | REV | 884235 | 886535 | 2300 MU-1885         | 886577 ybjH;ybjI;ybjJ      | ybjJ | 885354 | 15  |
| TU-2922 | REV | 887110 | 887335 | 225 MU-1886          | 887280 rybB                | rybB | 887199 | 3   |
| TU-2923 | REV | 887435 | 889179 | 1744 MU-1887         | 889168 ybjL                | ybjL | 887357 | 126 |
| TU-2924 | REV | 889729 | 890004 | 275 MU-1888          | 889999 grxA                | grxA | 889719 | 23  |
| TU-2925 | REV | 889729 | 890004 | 275 MU-1888          | 890020 grxA                | grxA | 889719 | 44  |
| TU-2926 | REV | 898482 | 899832 | 1350 MU-1889         | 899820 artJ                | artJ | 899067 | 22  |
| TU-2927 | REV | 898482 | 899832 | 1350 MU-1889         | 899828 artJ                | artJ | 899067 | 30  |
| TU-2928 | REV | 898482 | 899832 | 1350 MU-1889         | 899849 artJ                | artJ | 899067 | 51  |
| TU-2929 | REV | 900082 | 903007 | 2925 MU-1890         | 902993 artM;artQ;artI;artP | artP | 902229 | 36  |
| TU-2930 | REV | 900082 | 903007 | 2925 MU-1890         | 903066 artM;artQ;artI;artP | artP | 902229 | 109 |
| TU-2931 | REV | 903157 | 903707 | 550 MU-1891          | 903736 ybjP                | ybjP | 903175 | 46  |
| TU-2932 | REV | 904957 | 906007 | 1050 MU-1892         | 906078 ybjS                | ybjS | 904963 | 102 |
| TU-2933 | REV | 906082 | 908558 | 2476 MU-1893         | 908543 ybjT;ltaE           | ltaE | 907516 | 26  |
| TU-2934 | REV | 906082 | 910283 | 4201 MU-1893;MU-1894 | 910299 ybjT;ltaE;poxB      | poxB | 908554 | 27  |
| TU-2935 | REV | 910458 | 911608 | 1150 MU-1895         | 911723 hcr                 | hcr  | 910405 | 350 |
| TU-2936 | REV | 910458 | 913037 | 2579 MU-1895;MU-1896 | 913299 hcr;hcp             | hcp  | 911385 | 262 |
| TU-2937 | REV | 913208 | 914083 | 875 MU-1897          | 914076 ybjE                | ybjE | 913181 | -4  |
| TU-2938 | REV | 914358 | 914458 | 100 MU-1898          | 914507 NT                  |      |        |     |
| TU-2939 | REV | 914358 | 914458 | 100 MU-1898          | 914515 NT                  |      |        |     |
| TU-2940 | REV | 914633 | 915383 | 750 MU-1899          | 915454 aqpZ                | aqpZ | 914575 | 184 |
| TU-2941 | REV | 917033 | 918308 | 1275 MU-1900         | 918326 ybjX                | ybjX | 917351 | -17 |
| TU-2942 | REV | 921510 | 921885 | 375 MU-1901          | 921858 cspD                | cspD | 921589 | 45  |
| TU-2943 | REV | 921510 | 921885 | 375 MU-1901          | 921899 cspD                | cspD | 921589 | 86  |
| TU-2944 | REV | 925098 | 925323 | 225 MU-1902          | 925194 serW                | serW | 925107 | 0   |
| TU-2945 | REV | 925434 | 925909 | 475 MU-1903          | 925671 infA                | infA | 925448 | 5   |
| TU-2946 | REV | 925434 | 925909 | 475 MU-1903          | 925694 infA                | infA | 925448 | 28  |
| TU-2947 | REV | 925434 | 925909 | 475 MU-1903          | 925701 infA                | infA | 925448 | 35  |
| TU-2948 | REV | 925434 | 925909 | 475 MU-1903          | 925730 infA                | infA | 925448 | 64  |
| TU-2949 | REV | 925959 | 926809 | 850 MU-1904          | aat                        | aat  | 925951 |     |
| TU-2950 | REV | 926834 | 930234 | 3400 MU-1905         | 930221 cydC;cydD           | cydD | 928419 | 36  |
| TU-2951 | REV | 930284 | 931284 | 1000 MU-1906         | 931301 trxB                | trxB | 930308 | 28  |
| TU-2952 | REV | 943934 | 944809 | 875 MU-1907          | 944837 ycaC                | ycaC | 944154 | 57  |
| TU-2953 | REV | 947984 | 948784 | 800 MU-1908          | 948821 ycaN                | ycaN | 947883 | 30  |
| TU-2954 | REV | 949559 | 950359 | 800 MU-1909          | 950378 pflA                | pflA | 949563 | 75  |

|         |     |         |         |              |                                  |      |         |     |
|---------|-----|---------|---------|--------------|----------------------------------|------|---------|-----|
| TU-2955 | REV | 950509  | 952734  | 2225 MU-1910 | 952802 pflB                      | pflB | 950495  | 25  |
| TU-2956 | REV | 950509  | 952734  | 2225 MU-1910 | 952864 pflB                      | pflB | 950495  | 87  |
| TU-2957 | REV | 950509  | 952734  | 2225 MU-1910 | 952967 pflB                      | pflB | 950495  | 190 |
| TU-2958 | REV | 952759  | 953911  | 1152 MU-1911 | 953715 focA                      | focA | 952832  | 26  |
| TU-2959 | REV | 952759  | 953911  | 1152 MU-1911 | 953726 focA                      | focA | 952832  | 37  |
| TU-2960 | REV | 954136  | 955911  | 1775 MU-1912 | 955881 ycaO                      | ycaO | 954095  | 26  |
| TU-2961 | REV | 959086  | 959386  | 300 MU-1913  | 959396 NT                        |      |         |     |
| TU-2962 | REV | 972137  | 972612  | 475 MU-1914  | 972639 ycbC                      | ycbC | 971845  | 15  |
| TU-2963 | REV | 983462  | 984937  | 1475 MU-1915 | 984958 aspC                      | aspC | 983742  | 26  |
| TU-2964 | REV | 983462  | 984937  | 1475 MU-1915 | 984967 aspC                      | aspC | 983742  | 35  |
| TU-2965 | REV | 985088  | 986313  | 1225 MU-1916 | 986315 ompF                      | ompF | 985117  | 110 |
| TU-2966 | REV | 986817  | 988342  | 1525 MU-1917 | 988228 asnS                      | asnS | 986808  | 20  |
| TU-2967 | REV | 986817  | 988342  | 1525 MU-1917 | 988242 asnS                      | asnS | 986808  | 34  |
| TU-2968 | REV | 986817  | 988342  | 1525 MU-1917 | 988267 asnS                      | asnS | 986808  | 59  |
| TU-2969 | REV | 988392  | 989667  | 1275 MU-1918 | 989638 pncB                      | pncB | 988377  | 59  |
| TU-2970 | REV | 992567  | 996792  | 4225 MU-1919 | 996785 ssuB;ssuC;ssuD;ssuA;ssuE  | ssuE | 996160  | 50  |
| TU-2971 | REV | 1003568 | 1003668 | 100 MU-1920  | 1003714 NT                       |      |         |     |
| TU-2972 | REV | 1005893 | 1006818 | 925 MU-1921  | 1006847 ycbX                     | ycbX | 1005714 | 24  |
| TU-2973 | REV | 1015168 | 1015768 | 600 MU-1922  | 1015720 fabA                     | fabA | 1015175 | 27  |
| TU-2974 | REV | 1015793 | 1017518 | 1725 MU-1923 | 1017551 ycbZ                     | ycbZ | 1015762 | 29  |
| TU-2975 | REV | 1018243 | 1019443 | 1200 MU-1924 | 1019302 ompA                     | ompA | 1018236 | 26  |
| TU-2976 | REV | 1018243 | 1019443 | 1200 MU-1924 | 1019341 ompA                     | ompA | 1018236 | 65  |
| TU-2977 | REV | 1018243 | 1019443 | 1200 MU-1924 | 1019418 ompA                     | ompA | 1018236 | 142 |
| TU-2978 | REV | 1019468 | 1020143 | 675 MU-1925  | 1020172 sulA                     | sulA | 1019633 | 30  |
| TU-2979 | REV | 1020943 | 1023568 | 2625 MU-1926 | 1023560 yccS;yccF                | yccF | 1023125 | -11 |
| TU-2980 | REV | 1020943 | 1023568 | 2625 MU-1926 | 1023602 yccS;yccF                | yccF | 1023125 | 31  |
| TU-2981 | REV | 1025743 | 1026243 | 500 MU-1927  | 1026264 mgsA                     | mgsA | 1025780 | 26  |
| TU-2982 | REV | 1026393 | 1027018 | 625 MU-1928  | 1027059 yccT                     | yccT | 1026334 | 63  |
| TU-2983 | REV | 1027636 | 1027961 | 325 MU-1929  | 1027961 hspQ                     | hspQ | 1027627 | 17  |
| TU-2984 | REV | 1027636 | 1027961 | 325 MU-1929  | 1027966 hspQ                     | hspQ | 1027627 | 22  |
| TU-2985 | REV | 1027986 | 1029186 | 1200 MU-1930 | 1029221 yccW                     | yccW | 1028002 | 29  |
| TU-2986 | REV | 1029536 | 1029887 | 351 MU-1931  | 1029908 yccK                     | yccK | 1029562 | 17  |
| TU-2987 | REV | 1029536 | 1029887 | 351 MU-1931  | 1029915 yccK                     | yccK | 1029562 | 24  |
| TU-2988 | REV | 1029987 | 1030712 | 725 MU-1932  | 1030669 yccA                     | yccA | 1029982 | 28  |
| TU-2989 | REV | 1029987 | 1030712 | 725 MU-1932  | 1030673 yccA                     | yccA | 1029982 | 32  |
| TU-2990 | REV | 1030837 | 1030912 | 75 MU-1933   | 1030935 serT                     | serT | 1030848 | 0   |
| TU-2991 | REV | 1030937 | 1031412 | 475 MU-1934  | 1031352 NT                       |      |         |     |
| TU-2992 | REV | 1041187 | 1041812 | 625 MU-1935  | 1041752 NT                       |      |         |     |
| TU-2993 | REV | 1042137 | 1049212 | 7075 MU-1936 | etk;etp;gfcE;gfcD;gfcC;gfcB;gfcA | gfcA | 1048662 |     |
| TU-2994 | REV | 1049312 | 1049912 | 600 MU-1937  | 1049923 NT                       |      |         |     |
| TU-2995 | REV | 1050186 | 1050398 | 212 MU-1938  | cspH                             | cspH | 1050186 |     |
| TU-2996 | REV | 1051512 | 1052585 | 1073 MU-1939 | yccM                             | yccM | 1051512 |     |
| TU-2997 | REV | 1052657 | 1055401 | 2744 MU-1940 | torS                             | torS | 1052657 |     |
| TU-2998 | REV | 1056337 | 1057387 | 1050 MU-1941 | 1057207 torR                     | torR | 1056485 | 30  |
| TU-2999 | REV | 1061837 | 1063037 | 1200 MU-1942 | 1063026 cbpM;cbpA                | cbpA | 1062078 | 28  |
| TU-3000 | REV | 1061837 | 1063037 | 1200 MU-1942 | 1063051 cbpM;cbpA                | cbpA | 1062078 | 53  |

|         |     |         |         |                      |                                            |      |         |      |
|---------|-----|---------|---------|----------------------|--------------------------------------------|------|---------|------|
| TU-3001 | REV | 1061837 | 1063037 | 1200 MU-1942         | 1063056 cbpM;cbpA                          | cbpA | 1062078 | 58   |
| TU-3002 | REV | 1065987 | 1067112 | 1125 MU-1943         | 1066953 yccJ;wrbA                          | wrbA | 1066335 | 22   |
| TU-3003 | REV | 1065987 | 1067112 | 1125 MU-1943         | 1066959 yccJ;wrbA                          | wrbA | 1066335 | 28   |
| TU-3004 | REV | 1065987 | 1067112 | 1125 MU-1943         | 1066981 yccJ;wrbA                          | wrbA | 1066335 | 50   |
| TU-3005 | REV | 1067437 | 1068887 | 1450 MU-1944         | 1068877 rutG                               | rutG | 1067734 | -185 |
| TU-3006 | REV | 1067437 | 1073237 | 5800 MU-1944;MU-1945 | 1073288 rutG;rutF;rutE;rutD;rutC;rutB;rutA | rutA | 1072086 | 54   |
| TU-3007 | REV | 1074387 | 1078137 | 3750 MU-1946         | 1078129 putA                               | putA | 1074143 | 24   |
| TU-3008 | REV | 1074387 | 1078137 | 3750 MU-1946         | 1078136 putA                               | putA | 1074143 | 31   |
| TU-3009 | REV | 1074387 | 1078137 | 3750 MU-1946         | 1078145 putA                               | putA | 1074143 | 40   |
| TU-3010 | REV | 1080012 | 1080587 | 575 MU-1947          | 1080499 NT                                 |      |         |      |
| TU-3011 | REV | 1083712 | 1084062 | 350 MU-1948          | 1084079 NT                                 |      |         |      |
| TU-3012 | REV | 1085337 | 1085662 | 325 MU-1949          | 1085851 pgaD                               | pgaD | 1085329 | 109  |
| TU-3013 | REV | 1085329 | 1091512 | 6183 MU-1950         | pgaD;pgaC;pgaB;pgaA                        | pgaA | 1089089 |      |
| TU-3014 | REV | 1093437 | 1094687 | 1250 MU-1951         | insF;insE                                  | insE | 1094361 |      |
| TU-3015 | REV | 1096787 | 1096887 | 100 MU-1952          | 1096875 serX                               | serX | 1096788 | 0    |
| TU-3016 | REV | 1100137 | 1102537 | 2400 MU-1953         | 1102550 csgG;csgF;csgE;csgD                | csgD | 1101769 | 131  |
| TU-3017 | REV | 1100137 | 1102537 | 2400 MU-1953         | 1102566 csgG;csgF;csgE;csgD                | csgD | 1101769 | 147  |
| TU-3018 | REV | 1106915 | 1108215 | 1300 MU-1954         | 1108345 mdoC                               | mdoC | 1107007 | 181  |
| TU-3019 | REV | 1112815 | 1113415 | 600 MU-1955          | 1113435 msyB                               | msyB | 1113030 | 31   |
| TU-3020 | REV | 1113515 | 1114740 | 1225 MU-1956         | 1114756 mdtG                               | mdtG | 1113487 | 43   |
| TU-3021 | REV | 1114890 | 1115840 | 950 MU-1957          | 1115838 lpxL                               | lpxL | 1114885 | 33   |
| TU-3022 | REV | 1117140 | 1117890 | 750 MU-1958          | 1117768 yceI                               | yceI | 1117124 | 69   |
| TU-3023 | REV | 1117140 | 1117890 | 750 MU-1958          | 1117897 yceI                               | yceI | 1117124 | 198  |
| TU-3024 | REV | 1117140 | 1118269 | 1129 MU-1958;MU-1959 | 1118294 yceI;yceJ                          | yceJ | 1117703 | 25   |
| TU-3025 | REV | 1118530 | 1118670 | 140 MU-1960          | yceO                                       | yceO | 1118530 |      |
| TU-3026 | REV | 1118765 | 1119865 | 1100 MU-1961         | 1119832 solA                               | solA | 1118691 | 23   |
| TU-3027 | REV | 1119915 | 1120240 | 325 MU-1962          | 1120252 bssS                               | bssS | 1119924 | 74   |
| TU-3028 | REV | 1120472 | 1120697 | 225 MU-1963          | 1120732 dinI                               | dinI | 1120465 | 22   |
| TU-3029 | REV | 1120772 | 1121847 | 1075 MU-1964         | 1121857 pyrC                               | pyrC | 1120784 | 27   |
| TU-3030 | REV | 1120772 | 1121847 | 1075 MU-1964         | 1121866 pyrC                               | pyrC | 1120784 | 36   |
| TU-3031 | REV | 1122022 | 1123297 | 1275 MU-1965         | 1123304 yceB;grxB                          | grxB | 1122630 | 27   |
| TU-3032 | REV | 1123341 | 1124549 | 1208 MU-1966         | mdtH                                       | mdtH | 1123341 |      |
| TU-3033 | REV | 1128898 | 1129398 | 500 MU-1967          | 1129388 flgN;flgM                          | flgM | 1129058 | 37   |
| TU-3034 | REV | 1128898 | 1130086 | 1188 MU-1967;MU-1968 | flgN;flgM;flgA                             | flgA | 1129427 |      |
| TU-3035 | REV | 1140403 | 1144079 | 3676 MU-1969         | 1143581 rne                                | rne  | 1140405 | -9   |
| TU-3036 | REV | 1140403 | 1144079 | 3676 MU-1969         | 1143607 rne                                | rne  | 1140405 | 17   |
| TU-3037 | REV | 1140403 | 1144079 | 3676 MU-1969         | 1143903 rne                                | rne  | 1140405 | 313  |
| TU-3038 | REV | 1140403 | 1144079 | 3676 MU-1969         | 1144100 rne                                | rne  | 1140405 | 510  |
| TU-3039 | REV | 1145229 | 1145929 | 700 MU-1970          | 1145848 yceF                               | yceF | 1145234 | 30   |
| TU-3040 | REV | 1156605 | 1156855 | 250 MU-1971          | NT                                         |      |         |      |
| TU-3041 | REV | 1158780 | 1160830 | 2050 MU-1972         | 1160838 fhuE                               | fhuE | 1158585 | 64   |
| TU-3042 | REV | 1167280 | 1168055 | 775 MU-1973          | 1168006 ycfQ                               | ycfQ | 1167423 | -49  |
| TU-3043 | REV | 1168630 | 1169530 | 900 MU-1974          | 1169641 ycfS                               | ycfS | 1168635 | 44   |
| TU-3044 | REV | 1169780 | 1173205 | 3425 MU-1975         | 1173215 mfd                                | mfd  | 1169741 | 28   |
| TU-3045 | REV | 1169780 | 1173205 | 3425 MU-1975         | 1173251 mfd                                | mfd  | 1169741 | 64   |
| TU-3046 | REV | 1173315 | 1174388 | 1073 MU-1976         | ycfT                                       | ycfT | 1173315 |      |

|         |     |         |         |              |                             |      |         |     |
|---------|-----|---------|---------|--------------|-----------------------------|------|---------|-----|
| TU-3047 | REV | 1179702 | 1180490 | 788 MU-1977  | ycfZ                        | ycfZ | 1179702 |     |
| TU-3048 | REV | 1180487 | 1180948 | 461 MU-1978  | yfmA                        | yfmA | 1180487 |     |
| TU-3049 | REV | 1181012 | 1184862 | 3850 MU-1979 | 1184883 potD;potC;potB;potA | potA | 1183681 | 66  |
| TU-3050 | REV | 1186362 | 1187462 | 1100 MU-1980 | 1187488 ycfD                | ycfD | 1186342 | 25  |
| TU-3051 | REV | 1187487 | 1189662 | 2175 MU-1981 | 1189695 phoQ;phoP           | phoP | 1188999 | 25  |
| TU-3052 | REV | 1187487 | 1189662 | 2175 MU-1981 | 1189706 phoQ;phoP           | phoP | 1188999 | 36  |
| TU-3053 | REV | 1187487 | 1189662 | 2175 MU-1981 | 1189714 phoQ;phoP           | phoP | 1188999 | 44  |
| TU-3054 | REV | 1189687 | 1193141 | 3454 MU-1982 | 1193024 purB;hflD;mnmA      | mnmA | 1191890 | 28  |
| TU-3055 | REV | 1193216 | 1194141 | 925 MU-1983  | 1194167 nudJ;rluE           | rluE | 1193521 | -7  |
| TU-3056 | REV | 1196090 | 1196755 | 665 MU-1984  | 1196783 ymfD                | yfmD | 1196090 | 28  |
| TU-3057 | REV | 1196756 | 1197460 | 704 MU-1985  | 1197501 ymfE                | yfmE | 1196756 | 41  |
| TU-3058 | REV | 1199651 | 1200101 | 450 MU-1986  | 1200268 intE;xisE           | xisE | 1200010 | 13  |
| TU-3059 | REV | 1199651 | 1200101 | 450 MU-1986  | 1200279 intE;xisE           | xisE | 1200010 | 24  |
| TU-3060 | REV | 1200501 | 1200576 | 75 MU-1987   | 1200715 NT                  |      |         |     |
| TU-3061 | REV | 1201051 | 1202126 | 1075 MU-1988 | 1202147 ymfJ;yfmK           | yfmK | 1201482 | -9  |
| TU-3062 | REV | 1201051 | 1202126 | 1075 MU-1988 | 1202156 ymfJ;yfmK           | yfmK | 1201482 | 0   |
| TU-3063 | REV | 1202276 | 1202401 | 125 MU-1989  | 1202433 NT                  |      |         |     |
| TU-3064 | REV | 1202951 | 1203126 | 175 MU-1990  | 1203044 NT                  |      |         |     |
| TU-3065 | REV | 1207768 | 1207993 | 225 MU-1991  | 1208076 NT                  |      |         |     |
| TU-3066 | REV | 1207740 | 1208842 | 1102 MU-1992 | tfaE;stfE                   | stfE | 1208342 |     |
| TU-3067 | REV | 1210903 | 1211226 | 323 MU-1993  | elbA                        | elbA | 1210903 |     |
| TU-3068 | REV | 1211926 | 1212330 | 404 MU-1994  | 1212359 ycgX                | ycgX | 1211926 | 29  |
| TU-3069 | REV | 1212518 | 1213318 | 800 MU-1995  | 1213336 ycgE                | ycgE | 1212551 | 54  |
| TU-3070 | REV | 1213518 | 1214468 | 950 MU-1996  | 1214729 ycgF                | ycgF | 1213487 | 31  |
| TU-3071 | REV | 1221544 | 1222294 | 750 MU-1997  | 1222320 ymgD;ymgG;ymgI      | ymgI | 1222213 | -66 |
| TU-3072 | REV | 1223419 | 1225344 | 1925 MU-1998 | 1225362 minE;minD;minC      | minC | 1224608 | 59  |
| TU-3073 | REV | 1225519 | 1225619 | 100 MU-1999  | 1225656 NT                  |      |         |     |
| TU-3074 | REV | 1226119 | 1226720 | 601 MU-2000  | 1226729 ycgK                | ycgK | 1226294 | 34  |
| TU-3075 | REV | 1229220 | 1229620 | 400 MU-2001  | 1229673 hlyE                | hlyE | 1228706 | 56  |
| TU-3076 | REV | 1231720 | 1232245 | 525 MU-2002  | 1232278 dsbB                | dsbB | 1231723 | 25  |
| TU-3077 | REV | 1232420 | 1233945 | 1525 MU-2003 | 1233988 nhaB                | nhaB | 1232399 | 48  |
| TU-3078 | REV | 1234945 | 1236495 | 1550 MU-2004 | 1236509 ycgB                | ycgB | 1234932 | 45  |
| TU-3079 | REV | 1239395 | 1242320 | 2925 MU-2005 | 1242327 cvrA;ldcA           | ldcA | 1241389 | 24  |
| TU-3080 | REV | 1243420 | 1243870 | 450 MU-2006  | 1243778 ycgR                | ycgR | 1243016 | 28  |
| TU-3081 | REV | 1244899 | 1246624 | 1725 MU-2007 | 1246645 treA                | treA | 1244902 | 46  |
| TU-3082 | REV | 1246974 | 1250174 | 3200 MU-2008 | 1250020 dhaM;dhaL;dhaK      | dhaK | 1248991 | -41 |
| TU-3083 | REV | 1246974 | 1250174 | 3200 MU-2008 | 1250041 dhaM;dhaL;dhaK      | dhaK | 1248991 | -20 |
| TU-3084 | REV | 1252799 | 1255374 | 2575 MU-2009 | 1255468 ycgV                | ycgV | 1252308 | 293 |
| TU-3085 | REV | 1252799 | 1255374 | 2575 MU-2009 | 1255538 ycgV                | ycgV | 1252308 | 363 |
| TU-3086 | REV | 1255874 | 1256924 | 1050 MU-2010 | 1257105 ychF                | ychF | 1255944 | 70  |
| TU-3087 | REV | 1256949 | 1257749 | 800 MU-2011  | 1257765 pth                 | pth  | 1257152 | 29  |
| TU-3088 | REV | 1258599 | 1260049 | 1450 MU-2012 | 1260092 ychM                | ychM | 1258347 | 66  |
| TU-3089 | REV | 1260099 | 1261324 | 1225 MU-2013 | 1261082 prs                 | prs  | 1260151 | -16 |
| TU-3090 | REV | 1261349 | 1262724 | 1375 MU-2014 | 1262758 ispE;lolB           | lolB | 1262100 | 35  |
| TU-3091 | REV | 1268374 | 1268474 | 100 MU-2015  | 1268557 ldrA                | ldrA | 1268391 | 59  |
| TU-3092 | REV | 1268599 | 1268699 | 100 MU-2016  | NT                          |      |         |     |

|         |     |         |         |                      |                                       |      |         |     |
|---------|-----|---------|---------|----------------------|---------------------------------------|------|---------|-----|
| TU-3093 | REV | 1268899 | 1269024 | 125 MU-2017          | ldrB                                  | ldrB | 1268926 |     |
| TU-3094 | REV | 1269124 | 1269224 | 100 MU-2018          | NT                                    |      |         |     |
| TU-3095 | REV | 1269424 | 1269549 | 125 MU-2019          | ldrC                                  | ldrC | 1269461 |     |
| TU-3096 | REV | 1269649 | 1269749 | 100 MU-2020          | NT                                    |      |         |     |
| TU-3097 | REV | 1269974 | 1271099 | 1125 MU-2021         | 1271119 chaA                          | chaA | 1269972 | 47  |
| TU-3098 | REV | 1272499 | 1272924 | 425 MU-2022          | 1272855 ychN                          | ychN | 1272469 | 33  |
| TU-3099 | REV | 1274375 | 1277000 | 2625 MU-2023         | 1277086 narL;narX                     | narX | 1275045 | 245 |
| TU-3100 | REV | 1286375 | 1286525 | 150 MU-2024          | 1286462 rttR;trp;tyrV                 | tyrV | 1286467 | -89 |
| TU-3101 | REV | 1286550 | 1286825 | 275 MU-2025          | 1286758 tyrT                          | tyrT | 1286761 | -87 |
| TU-3102 | REV | 1286850 | 1288375 | 1525 MU-2026         | 1288373 purU;ychJ                     | ychJ | 1287897 | 18  |
| TU-3103 | REV | 1286850 | 1288375 | 1525 MU-2026         | 1288400 purU;ychJ                     | ychJ | 1287897 | 45  |
| TU-3104 | REV | 1289125 | 1289325 | 200 MU-2027          | 1289388 NT                            |      |         |     |
| TU-3105 | REV | 1291725 | 1292150 | 425 MU-2028          | 1292153 hns                           | hns  | 1291732 | 8   |
| TU-3106 | REV | 1291725 | 1292150 | 425 MU-2028          | 1292181 hns                           | hns  | 1291732 | 36  |
| TU-3107 | REV | 1293649 | 1294545 | 896 MU-2029          | insZ                                  | insZ | 1293649 |     |
| TU-3108 | REV | 1294475 | 1297475 | 3000 MU-2030         | 1297361 adhE                          | adhE | 1294669 | 17  |
| TU-3109 | REV | 1294475 | 1297475 | 3000 MU-2030         | 1297367 adhE                          | adhE | 1294669 | 23  |
| TU-3110 | REV | 1294475 | 1297475 | 3000 MU-2030         | 1297374 adhE                          | adhE | 1294669 | 30  |
| TU-3111 | REV | 1294475 | 1297475 | 3000 MU-2030         | 1297392 adhE                          | adhE | 1294669 | 48  |
| TU-3112 | REV | 1294475 | 1297475 | 3000 MU-2030         | 1297440 adhE                          | adhE | 1294669 | 96  |
| TU-3113 | REV | 1294475 | 1297475 | 3000 MU-2030         | 1297477 adhE                          | adhE | 1294669 | 133 |
| TU-3114 | REV | 1304851 | 1306676 | 1825 MU-2031         | 1306680 yciU;cls                      | cls  | 1305209 | 11  |
| TU-3115 | REV | 1304851 | 1306676 | 1825 MU-2031         | 1306697 yciU;cls                      | cls  | 1305209 | 28  |
| TU-3116 | REV | 1307026 | 1308526 | 1500 MU-2032         | 1308374 kch                           | kch  | 1307040 | 81  |
| TU-3117 | REV | 1307026 | 1308526 | 1500 MU-2032         | 1308579 kch                           | kch  | 1307040 | 286 |
| TU-3118 | REV | 1308626 | 1308901 | 275 MU-2033          | 1308916 yciI                          | yciI | 1308593 | 27  |
| TU-3119 | REV | 1309876 | 1310276 | 400 MU-2034          | 1310298 yciA                          | yciA | 1309872 | 28  |
| TU-3120 | REV | 1310376 | 1311701 | 1325 MU-2035         | 1311720 yciB;yciC                     | yciC | 1310944 | 33  |
| TU-3121 | REV | 1312776 | 1314076 | 1300 MU-2036         | 1314116 yciE;yciF;yciG                | yciG | 1313880 | 57  |
| TU-3122 | REV | 1314402 | 1318177 | 3775 MU-2037         | 1317986 trpA;trpB;trpC                | trpC | 1316451 | 177 |
| TU-3123 | REV | 1314402 | 1318177 | 3775 MU-2037         | 1318200 trpA;trpB;trpC                | trpC | 1316451 | 391 |
| TU-3124 | REV | 1314402 | 1321102 | 6700 MU-2037;MU-2038 | 1321132 trpA;trpB;trpC;trpD;trpE;trpL | trpL | 1321062 | 26  |
| TU-3125 | REV | 1325702 | 1327227 | 1525 MU-2039         | 1327190 btuR;yciK                     | yciK | 1326378 | 54  |
| TU-3126 | REV | 1328502 | 1328752 | 250 MU-2040          | 1328711 yciN                          | yciN | 1328441 | 19  |
| TU-3127 | REV | 1328502 | 1328752 | 250 MU-2040          | 1328719 yciN                          | yciN | 1328441 | 27  |
| TU-3128 | REV | 1328502 | 1328752 | 250 MU-2040          | 1328738 yciN                          | yciN | 1328441 | 46  |
| TU-3129 | REV | 1336613 | 1337188 | 575 MU-2041          | 1337214 ribA                          | ribA | 1336594 | 30  |
| TU-3130 | REV | 1341038 | 1341463 | 425 MU-2042          | 1341392 osmB                          | osmB | 1341134 | 40  |
| TU-3131 | REV | 1341038 | 1341463 | 425 MU-2042          | 1341449 osmB                          | osmB | 1341134 | 97  |
| TU-3132 | REV | 1341738 | 1342388 | 650 MU-2043          | 1342411 yciT                          | yciT | 1341621 | 41  |
| TU-3133 | REV | 1341738 | 1342663 | 925 MU-2043;MU-2044  | 1342663 yciT;yciZ                     | yciZ | 1342460 | 30  |
| TU-3134 | REV | 1342813 | 1344838 | 2025 MU-2045         | 1344866 gmr                           | gmr  | 1342781 | 100 |
| TU-3135 | REV | 1345013 | 1347138 | 2125 MU-2046         | 1346965 rnb                           | rnb  | 1345002 | 29  |
| TU-3136 | REV | 1345013 | 1347138 | 2125 MU-2046         | 1347152 rnb                           | rnb  | 1345002 | 216 |
| TU-3137 | REV | 1347163 | 1348213 | 1050 MU-2047         | yciW                                  | yciW | 1347004 |     |
| TU-3138 | REV | 1348313 | 1349113 | 800 MU-2048          | 1349112 fabI                          | fabI | 1348275 | 49  |

|         |     |         |         |                      |                                       |      |         |      |
|---------|-----|---------|---------|----------------------|---------------------------------------|------|---------|------|
| TU-3139 | REV | 1348313 | 1349113 | 800 MU-2048          | 1349118 fabI                          | fabI | 1348275 | 55   |
| TU-3140 | REV | 1348313 | 1349113 | 800 MU-2048          | 1349127 fabI                          | fabI | 1348275 | 64   |
| TU-3141 | REV | 1348313 | 1349113 | 800 MU-2048          | 1349144 fabI                          | fabI | 1348275 | 81   |
| TU-3142 | REV | 1349365 | 1354140 | 4775 MU-2049         | 1354010 ycjD;sapF;sapD;sapC;sapB      | sapB | 1352529 | 516  |
| TU-3143 | REV | 1349365 | 1354140 | 4775 MU-2049         | 1354061 ycjD;sapF;sapD;sapC;sapB      | sapB | 1352529 | 567  |
| TU-3144 | REV | 1349365 | 1354140 | 4775 MU-2049         | 1354111 ycjD;sapF;sapD;sapC;sapB      | sapB | 1352529 | 617  |
| TU-3145 | REV | 1349365 | 1355365 | 6000 MU-2049;MU-2050 | 1355205 ycjD;sapF;sapD;sapC;sapB;sapA | sapA | 1353491 | 71   |
| TU-3146 | REV | 1349365 | 1355365 | 6000 MU-2049;MU-2050 | 1355443 ycjD;sapF;sapD;sapC;sapB;sapA | sapA | 1353491 | 309  |
| TU-3147 | REV | 1355390 | 1355715 | 325 MU-2051          | 1355723 ymjA                          | ymjA | 1355447 | 31   |
| TU-3148 | REV | 1355815 | 1358965 | 3150 MU-2052         | 1358991 puuP;puuA                     | puuA | 1357514 | 59   |
| TU-3149 | REV | 1365290 | 1365915 | 625 MU-2053          | 1365969 pspF                          | pspF | 1364959 | 33   |
| TU-3150 | REV | 1381216 | 1381991 | 775 MU-2054          | 1382013 ycjW                          | ycjW | 1380987 | 28   |
| TU-3151 | REV | 1386266 | 1386841 | 575 MU-2055          | 1386860 tpx                           | tpx  | 1386329 | 25   |
| TU-3152 | REV | 1386266 | 1386841 | 575 MU-2055          | 1386868 tpx                           | tpx  | 1386329 | 33   |
| TU-3153 | REV | 1387791 | 1388766 | 975 MU-2056          | 1388647 mpaA                          | mpaA | 1387894 | -35  |
| TU-3154 | REV | 1389091 | 1389866 | 775 MU-2057          | 1389911 ymjC;ycjY                     | ycjY | 1388957 | 22   |
| TU-3155 | REV | 1389091 | 1389866 | 775 MU-2057          | 1389918 ymjC;ycjY                     | ycjY | 1388957 | 29   |
| TU-3156 | REV | 1392941 | 1393966 | 1025 MU-2058         | 1393949 ynaI                          | ynaI | 1392915 | 3    |
| TU-3157 | REV | 1395691 | 1396716 | 1025 MU-2059         | 1396683 uspE                          | uspE | 1395696 | 37   |
| TU-3158 | REV | 1396791 | 1397666 | 875 MU-2060          | 1397563 fnr                           | fnr  | 1396798 | 13   |
| TU-3159 | REV | 1396791 | 1397666 | 875 MU-2060          | 1397576 fnr                           | fnr  | 1396798 | 26   |
| TU-3160 | REV | 1397767 | 1398267 | 500 MU-2061          | 1398309 ogt                           | ogt  | 1397745 | 49   |
| TU-3161 | REV | 1398867 | 1402592 | 3725 MU-2062         | 1402613 abgT;abgB;abgA                | abgA | 1401279 | 24   |
| TU-3162 | REV | 1398867 | 1402592 | 3725 MU-2062         | 1402707 abgT;abgB;abgA                | abgA | 1401279 | 118  |
| TU-3163 | REV | 1403717 | 1403792 | 75 MU-2063           | 1403829 isrA                          | isrA | 1403676 | -4   |
| TU-3164 | REV | 1404392 | 1405917 | 1525 MU-2064         | 1405893 ydaM                          | ydaM | 1404587 | 74   |
| TU-3165 | REV | 1407317 | 1407417 | 100 MU-2065          | 1407453 NT                            |      |         |      |
| TU-3166 | REV | 1408867 | 1410443 | 1576 MU-2066         | 1410148 ttcA                          | ttcA | 1409037 | 176  |
| TU-3167 | REV | 1408867 | 1410443 | 1576 MU-2066         | 1410184 ttcA                          | ttcA | 1409037 | 212  |
| TU-3168 | REV | 1411468 | 1415118 | 3650 MU-2067         | 1415056 intR;ydaQ;ydaC;lar;recT;recE  | recE | 1412810 | -354 |
| TU-3169 | REV | 1415512 | 1415787 | 275 MU-2068          | racC                                  | racC | 1415512 |      |
| TU-3170 | REV | 1415862 | 1416253 | 391 MU-2069          | ydaE;kiIR                             | kiIR | 1416032 |      |
| TU-3171 | REV | 1417180 | 1417480 | 300 MU-2070          | ydaF;ydaG                             | ydaG | 1417346 |      |
| TU-3172 | REV | 1417743 | 1418243 | 500 MU-2071          | 1418265 racR                          | racR | 1417789 | 0    |
| TU-3173 | REV | 1421436 | 1421686 | 250 MU-2072          | 1421757 NT                            |      |         |      |
| TU-3174 | REV | 1424887 | 1425012 | 125 MU-2073          | 1424997 NT                            |      |         |      |
| TU-3175 | REV | 1425787 | 1426762 | 975 MU-2074          | 1426777 insH                          | insH | 1425770 | 27   |
| TU-3176 | REV | 1431108 | 1431698 | 590 MU-2075          | pinR                                  | pinR | 1431108 |      |
| TU-3177 | REV | 1432163 | 1432588 | 425 MU-2076          | 1432557 ynaE                          | ynaE | 1432015 | 276  |
| TU-3178 | REV | 1432982 | 1433032 | 50 MU-2077           | ttcC                                  | ttcC | 1432982 |      |
| TU-3179 | REV | 1433138 | 1433688 | 550 MU-2078          | 1433665 uspF                          | uspF | 1433209 | 22   |
| TU-3180 | REV | 1433138 | 1433688 | 550 MU-2078          | 1433735 uspF                          | uspF | 1433209 | 92   |
| TU-3181 | REV | 1433784 | 1434917 | 1133 MU-2079         | ompN                                  | ompN | 1433784 |      |
| TU-3182 | REV | 1435288 | 1438838 | 3550 MU-2080         | 1438869 ydbK                          | ydbK | 1435284 | 61   |
| TU-3183 | REV | 1439188 | 1439763 | 575 MU-2081          | 1439801 hslJ                          | hslJ | 1439345 | 34   |
| TU-3184 | REV | 1439838 | 1440888 | 1050 MU-2082         | 1440902 ldhA                          | ldhA | 1439878 | 35   |

|         |     |         |         |                      |                                       |      |         |     |
|---------|-----|---------|---------|----------------------|---------------------------------------|------|---------|-----|
| TU-3185 | REV | 1439838 | 1440888 | 1050 MU-2082         | 1440913 ldhA                          | ldhA | 1439878 | 46  |
| TU-3186 | REV | 1439838 | 1440888 | 1050 MU-2082         | 1440942 ldhA                          | ldhA | 1439878 | 75  |
| TU-3187 | REV | 1440913 | 1441513 | 600 MU-2083          | 1441359 NT                            |      |         |     |
| TU-3188 | REV | 1444513 | 1445313 | 800 MU-2084          | 1445332 feaR                          | feaR | 1444402 | 25  |
| TU-3189 | REV | 1447538 | 1451563 | 4025 MU-2085         | 1451735 tynA;maoC                     | maoC | 1449621 | 69  |
| TU-3190 | REV | 1465963 | 1467338 | 1375 MU-2086         | insD;insC                             | insC | 1466808 |     |
| TU-3191 | REV | 1480297 | 1480897 | 600 MU-2087          | 1480928 azoR                          | azoR | 1480279 | 44  |
| TU-3192 | REV | 1487742 | 1488867 | 1125 MU-2088         | 1488776 gapC                          | gapC | 1487737 | 39  |
| TU-3193 | REV | 1489467 | 1489530 | 63 MU-2089           | 1489529 rydC                          | rydC | 1489467 | -1  |
| TU-3194 | REV | 1489892 | 1490217 | 325 MU-2090          | 1490241 hokB;mokB                     | mokB | 1489986 | 88  |
| TU-3195 | REV | 1489892 | 1490217 | 325 MU-2090          | 1490328 hokB;mokB                     | mokB | 1489986 | 175 |
| TU-3196 | REV | 1492092 | 1493142 | 1050 MU-2091         | 1493095 ydcI                          | ydcI | 1492172 | 0   |
| TU-3197 | REV | 1492092 | 1493142 | 1050 MU-2091         | 1493140 ydcI                          | ydcI | 1492172 | 45  |
| TU-3198 | REV | 1497302 | 1498502 | 1200 MU-2092         | 1498495 ydcK                          | ydcK | 1497493 | 22  |
| TU-3199 | REV | 1501167 | 1501658 | 491 MU-2093          | yncK                                  | yncK | 1501167 |     |
| TU-3200 | REV | 1503005 | 1504382 | 1377 MU-2094         | 1504416 ydcO                          | ydcO | 1502929 | 312 |
| TU-3201 | REV | 1506382 | 1507107 | 725 MU-2095          | 1507112 yncJ                          | yncJ | 1506858 | 24  |
| TU-3202 | REV | 1514950 | 1515325 | 375 MU-2096          | 1515242 yncL                          | yncL | 1515123 | 24  |
| TU-3203 | REV | 1514950 | 1515325 | 375 MU-2096          | 1515272 yncL                          | yncL | 1515123 | 54  |
| TU-3204 | REV | 1515875 | 1516875 | 1000 MU-2097         | 1516888 ydcZ;yncA                     | yncA | 1516352 | 18  |
| TU-3205 | REV | 1515875 | 1516875 | 1000 MU-2097         | 1516897 ydcZ;yncA                     | yncA | 1516352 | 27  |
| TU-3206 | REV | 1518900 | 1521100 | 2200 MU-2098         | 1521181 yncD                          | yncD | 1518987 | 92  |
| TU-3207 | REV | 1522600 | 1524000 | 1400 MU-2099         | 1524030 ansP                          | ansP | 1522505 | 26  |
| TU-3208 | REV | 1531381 | 1531881 | 500 MU-2100          | 1531895 yddH                          | yddH | 1531306 | 20  |
| TU-3209 | REV | 1531381 | 1531881 | 500 MU-2100          | 1531900 yddH                          | yddH | 1531306 | 25  |
| TU-3210 | REV | 1532906 | 1533881 | 975 MU-2101          | 1533900 yddE                          | yddE | 1532989 | 18  |
| TU-3211 | REV | 1534331 | 1542131 | 7800 MU-2102         | 1542127 narV;narW;narY;narZ;narU      | narU | 1540696 | 43  |
| TU-3212 | REV | 1542408 | 1544052 | 1644 MU-2103         | yddJ;yddK;yddL                        | yddL | 1543774 |     |
| TU-3213 | REV | 1544567 | 1545192 | 625 MU-2104          | 1545227 yddG                          | yddG | 1544312 | 34  |
| TU-3214 | REV | 1550067 | 1550717 | 650 MU-2105          | 1550736 yddM                          | yddM | 1550422 | 30  |
| TU-3215 | REV | 1550767 | 1551892 | 1125 MU-2106         | 1551862 adhP                          | adhP | 1550852 | 0   |
| TU-3216 | REV | 1550767 | 1551892 | 1125 MU-2106         | 1551892 adhP                          | adhP | 1550852 | 30  |
| TU-3217 | REV | 1551992 | 1553742 | 1750 MU-2107         | 1553716 maeA                          | maeA | 1551996 | 23  |
| TU-3218 | REV | 1551992 | 1553742 | 1750 MU-2107         | 1553726 maeA                          | maeA | 1551996 | 33  |
| TU-3219 | REV | 1553842 | 1554117 | 275 MU-2108          | 1554071 sra                           | sra  | 1553850 | 84  |
| TU-3220 | REV | 1554167 | 1554342 | 175 MU-2109          | 1554479 bdm                           | bdm  | 1554089 | 175 |
| TU-3221 | REV | 1554917 | 1561117 | 6200 MU-2110         | 1561168 ddpF;ddpD;ddpC;ddpB;ddpA;ddpX | ddpX | 1560519 | 68  |
| TU-3222 | REV | 1561467 | 1565292 | 3825 MU-2111         | 1565236 dos;yddV                      | yddV | 1563782 | 72  |
| TU-3223 | REV | 1561467 | 1565292 | 3825 MU-2111         | 1565318 dos;yddV                      | yddV | 1563782 | 154 |
| TU-3224 | REV | 1565467 | 1566843 | 1376 MU-2112         | 1567038 yddW                          | yddW | 1565528 | 191 |
| TU-3225 | REV | 1566993 | 1568710 | 1717 MU-2113         | 1568587 gadC                          | gadC | 1566978 | 74  |
| TU-3226 | REV | 1566993 | 1570060 | 3067 MU-2113;MU-2114 | 1570097 gadC;gadB                     | gadB | 1568669 | 28  |
| TU-3227 | REV | 1570585 | 1572910 | 2325 MU-2115         | pqqL                                  | pqqL | 1570431 |     |
| TU-3228 | REV | 1573271 | 1577366 | 4095 MU-2116         | yddB;yddA                             | yddA | 1575681 |     |
| TU-3229 | REV | 1577657 | 1580548 | 2891 MU-2117         | ydeM;ydeN                             | ydeN | 1578866 |     |
| TU-3230 | REV | 1580950 | 1581983 | 1033 MU-2118         | ydeO;yneN                             | yneN | 1581786 |     |

|         |     |         |         |                      |                             |      |         |      |
|---------|-----|---------|---------|----------------------|-----------------------------|------|---------|------|
| TU-3231 | REV | 1582487 | 1584587 | 2100 MU-2119         | 1584688 ydeP                | ydeP | 1582231 | 178  |
| TU-3232 | REV | 1584844 | 1585758 | 914 MU-2120          | ydeQ                        | ydeQ | 1584844 |      |
| TU-3233 | REV | 1585962 | 1586737 | 775 MU-2121          | 1586568 ydeR;ydeS           | ydeS | 1586333 | -295 |
| TU-3234 | REV | 1585962 | 1588012 | 2050 MU-2121;MU-2122 | 1588058 ydeR;ydeS;ydeT      | ydeT | 1586877 | -45  |
| TU-3235 | REV | 1588512 | 1590487 | 1975 MU-2123         | 1590504 yneL;hipA;hipB      | hipB | 1590200 | 38   |
| TU-3236 | REV | 1590787 | 1596537 | 5750 MU-2124         | 1596621 ydeU;ydeK           | ydeK | 1592133 | 511  |
| TU-3237 | REV | 1596812 | 1599412 | 2600 MU-2125         | 1599295 lsrK;lsrR           | lsrR | 1598312 | 30   |
| TU-3238 | REV | 1606137 | 1607037 | 900 MU-2126          | 1607069 yneE                | yneE | 1606132 | 23   |
| TU-3239 | REV | 1606137 | 1607037 | 900 MU-2126          | 1607122 yneE                | yneE | 1606132 | 76   |
| TU-3240 | REV | 1607362 | 1609887 | 2525 MU-2127         | 1610053 uxaB;yneF           | yneF | 1608931 | 175  |
| TU-3241 | REV | 1609962 | 1611337 | 1375 MU-2128         | 1611305 yneG;yneH           | yneH | 1610349 | 30   |
| TU-3242 | REV | 1611412 | 1612837 | 1425 MU-2129         | 1612751 sad                 | sad  | 1611339 | 24   |
| TU-3243 | REV | 1616312 | 1616937 | 625 MU-2130          | 1616924 marC                | marC | 1616267 | -8   |
| TU-3244 | REV | 1617937 | 1619162 | 1225 MU-2131         | 1619191 eamA                | eamA | 1618262 | 30   |
| TU-3245 | REV | 1619312 | 1619662 | 350 MU-2132          | 1619702 NT                  |      |         |      |
| TU-3246 | REV | 1620862 | 1621887 | 1025 MU-2133         | 1621901 ydeH                | ydeH | 1620984 | 27   |
| TU-3247 | REV | 1622012 | 1622512 | 500 MU-2134          | 1622540 ydeI                | ydeI | 1622129 | 19   |
| TU-3248 | REV | 1623212 | 1625412 | 2200 MU-2135         | 1625428 dcp                 | dcp  | 1623359 | 24   |
| TU-3249 | REV | 1627462 | 1630137 | 2675 MU-2136         | ydfI;ydfJ                   | ydfJ | 1629026 |      |
| TU-3250 | REV | 1631712 | 1632262 | 550 MU-2137          | NT                          |      |         |      |
| TU-3251 | REV | 1632387 | 1634437 | 2050 MU-2138         | 1634425 tfaQ;ydfN;nohA      | nohA | 1633864 | 34   |
| TU-3252 | REV | 1632387 | 1634437 | 2050 MU-2138         | 1634515 tfaQ;ydfN;nohA      | nohA | 1633864 | 124  |
| TU-3253 | REV | 1634799 | 1635099 | 300 MU-2139          | NT                          |      |         |      |
| TU-3254 | REV | 1635574 | 1635861 | 287 MU-2140          | 1635851 gnsB                | gnsB | 1635633 | 45   |
| TU-3255 | REV | 1635574 | 1635861 | 287 MU-2140          | 1635870 gnsB                | gnsB | 1635633 | 64   |
| TU-3256 | REV | 1635978 | 1636133 | 155 MU-2141          | yfnN                        | yfnN | 1635978 |      |
| TU-3257 | REV | 1636479 | 1636691 | 212 MU-2142          | 1636836 cspI                | cspI | 1636479 | 145  |
| TU-3258 | REV | 1637054 | 1638609 | 1555 MU-2143         | 1638778 ydfP;arrQ;ydfR;essQ | essQ | 1638394 | 169  |
| TU-3259 | REV | 1639337 | 1639712 | 375 MU-2144          | 1639516 cspB                | cspB | 1639363 | -62  |
| TU-3260 | REV | 1640513 | 1642226 | 1713 MU-2145         | 1642531 quuQ;ydfU           | ydfU | 1641279 | 305  |
| TU-3261 | REV | 1642737 | 1642887 | 150 MU-2146          | rem                         | rem  | 1642675 |      |
| TU-3262 | REV | 1643012 | 1643890 | 878 MU-2147          | 1643925 hokD;relE;relB      | relB | 1643657 | 29   |
| TU-3263 | REV | 1644040 | 1644215 | 175 MU-2148          | 1644207 NT                  |      |         |      |
| TU-3264 | REV | 1644815 | 1645115 | 300 MU-2149          | 1645143 NT                  |      |         |      |
| TU-3265 | REV | 1645146 | 1645874 | 728 MU-2150          | ydfW;ydfX;dicC              | dicC | 1645644 |      |
| TU-3266 | REV | 1649265 | 1649565 | 300 MU-2151          | NT                          |      |         |      |
| TU-3267 | REV | 1650779 | 1650862 | 83 MU-2152           | ydfJ                        | ydfJ | 1650779 |      |
| TU-3268 | REV | 1650920 | 1653165 | 2245 MU-2153         | rspB;rspA                   | rspA | 1651951 |      |
| TU-3269 | REV | 1653420 | 1653670 | 250 MU-2154          | 1653729 ynfA                | ynfA | 1653371 | 32   |
| TU-3270 | REV | 1654295 | 1655470 | 1175 MU-2155         | 1655507 ynfC                | ynfC | 1654771 | 26   |
| TU-3271 | REV | 1664395 | 1665270 | 875 MU-2156          | 1665277 ynfK                | ynfK | 1664548 | 34   |
| TU-3272 | REV | 1664395 | 1665270 | 875 MU-2156          | 1665281 ynfK                | ynfK | 1664548 | 38   |
| TU-3273 | REV | 1664395 | 1665270 | 875 MU-2156          | 1665398 ynfK                | ynfK | 1664548 | 155  |
| TU-3274 | REV | 1665420 | 1666595 | 1175 MU-2157         | 1666625 dgsA                | dgsA | 1665368 | 37   |
| TU-3275 | REV | 1666795 | 1667570 | 775 MU-2158          | 1667696 ynfL                | ynfL | 1666723 | 80   |
| TU-3276 | REV | 1666795 | 1667570 | 775 MU-2158          | 1667714 ynfL                | ynfL | 1666723 | 98   |



|         |     |         |         |                              |                        |      |         |     |
|---------|-----|---------|---------|------------------------------|------------------------|------|---------|-----|
| TU-3277 | REV | 1668845 | 1669145 | 300 MU-2159                  | 1669157 NT             |      |         |     |
| TU-3278 | REV | 1669370 | 1669920 | 550 MU-2160                  | 1669894 NT             |      |         |     |
| TU-3279 | REV | 1670670 | 1671770 | 1100 MU-2161                 | 1671802 mdtI;mdtJ      | mdtJ | 1671160 | 277 |
| TU-3280 | REV | 1672745 | 1676245 | 3500 MU-2162                 | 1675955 pntB;pntA      | pntA | 1674395 | 28  |
| TU-3281 | REV | 1672745 | 1676245 | 3500 MU-2162                 | 1676006 pntB;pntA      | pntA | 1674395 | 79  |
| TU-3282 | REV | 1672745 | 1676245 | 3500 MU-2162                 | 1676021 pntB;pntA      | pntA | 1674395 | 94  |
| TU-3283 | REV | 1672745 | 1676245 | 3500 MU-2162                 | 1676026 pntB;pntA      | pntA | 1674395 | 99  |
| TU-3284 | REV | 1672745 | 1676245 | 3500 MU-2162                 | 1676038 pntB;pntA      | pntA | 1674395 | 111 |
| TU-3285 | REV | 1679395 | 1680070 | 675 MU-2163                  | 1680084 ydgC           | ydgC | 1679719 | 30  |
| TU-3286 | REV | 1679395 | 1680070 | 675 MU-2163                  | 1680170 ydgC           | ydgC | 1679719 | 116 |
| TU-3287 | REV | 1682695 | 1682770 | 75 MU-2164                   | 1682812 NT             |      |         |     |
| TU-3288 | REV | 1683045 | 1684645 | 1600 MU-2165                 | fumC                   | fumC | 1683209 |     |
| TU-3289 | REV | 1683045 | 1686570 | 3525 MU-2165;MU-2166         | 1686432 fumC;fumA      | fumA | 1684755 | 31  |
| TU-3290 | REV | 1683045 | 1686570 | 3525 MU-2165;MU-2166         | 1686465 fumC;fumA      | fumA | 1684755 | 64  |
| TU-3291 | REV | 1689670 | 1694095 | 4425 MU-2167                 | 1694118 uidC;uidB;uidA | uidA | 1692284 | 23  |
| TU-3292 | REV | 1694470 | 1695170 | 700 MU-2168                  | 1695100 uidR           | uidR | 1694486 | 24  |
| TU-3293 | REV | 1695220 | 1696121 | 901 MU-2169                  | 1696092 hdhA           | hdhA | 1695297 | 28  |
| TU-3294 | REV | 1695220 | 1696121 | 901 MU-2169                  | 1696124 hdhA           | hdhA | 1695297 | 60  |
| TU-3295 | REV | 1695220 | 1696121 | 901 MU-2169                  | 1696131 hdhA           | hdhA | 1695297 | 67  |
| TU-3296 | REV | 1695220 | 1696121 | 901 MU-2169                  | 1696146 hdhA           | hdhA | 1695297 | 82  |
| TU-3297 | REV | 1696246 | 1697271 | 1025 MU-2170                 | 1697265 malI           | malI | 1696176 | 61  |
| TU-3298 | REV | 1701246 | 1702346 | 1100 MU-2171                 | 1702355 ydgJ           | ydgJ | 1701292 | 23  |
| TU-3299 | REV | 1710271 | 1710796 | 525 MU-2172                  | 1710806 NT             |      |         |     |
| TU-3300 | REV | 1713096 | 1713921 | 825 MU-2173                  | 1713968 pdxY           | pdxY | 1713050 | 55  |
| TU-3301 | REV | 1713096 | 1713921 | 825 MU-2173                  | 1713997 pdxY           | pdxY | 1713050 | 84  |
| TU-3302 | REV | 1713096 | 1715296 | 2200 MU-2173;MU-2174         | 1715311 pdxY;tyrS      | tyrS | 1713972 | 65  |
| TU-3303 | REV | 1713096 | 1716046 | 2950 MU-2173;MU-2174;MU-2175 | 1716058 pdxY;tyrS;pdxH | pdxH | 1715375 | 27  |
| TU-3304 | REV | 1716146 | 1716371 | 225 MU-2176                  | ydhA                   | ydhA | 1716090 |     |
| TU-3305 | REV | 1716721 | 1717696 | 975 MU-2177                  | 1717654 anmK           | anmK | 1716517 | 28  |
| TU-3306 | REV | 1716721 | 1717696 | 975 MU-2177                  | 1717806 anmK           | anmK | 1716517 | 180 |
| TU-3307 | REV | 1718421 | 1718971 | 550 MU-2178                  | 1718877 slyA           | slyA | 1718414 | 29  |
| TU-3308 | REV | 1718421 | 1718971 | 550 MU-2178                  | 1718884 slyA           | slyA | 1718414 | 36  |
| TU-3309 | REV | 1718421 | 1718971 | 550 MU-2178                  | 1718894 slyA           | slyA | 1718414 | 46  |
| TU-3310 | REV | 1720521 | 1721096 | 575 MU-2179                  | 1721100 NT             |      |         |     |
| TU-3311 | REV | 1720521 | 1721096 | 575 MU-2179                  | 1721114 NT             |      |         |     |
| TU-3312 | REV | 1721871 | 1722696 | 825 MU-2180                  | 1722703 sodC           | sodC | 1722158 | 24  |
| TU-3313 | REV | 1722721 | 1723721 | 1000 MU-2181                 | 1723679 ydhF           | ydhF | 1722760 | 23  |
| TU-3314 | REV | 1723796 | 1724021 | 225 MU-2182                  | 1723969 ydhL           | ydhL | 1723705 | 25  |
| TU-3315 | REV | 1731765 | 1732315 | 550 MU-2183                  | 1732142 grxD           | grxD | 1731778 | 17  |
| TU-3316 | REV | 1731765 | 1732315 | 550 MU-2183                  | 1732160 grxD           | grxD | 1731778 | 35  |
| TU-3317 | REV | 1731765 | 1732315 | 550 MU-2183                  | 1732184 grxD           | grxD | 1731778 | 59  |
| TU-3318 | REV | 1731765 | 1732315 | 550 MU-2183                  | 1732213 grxD           | grxD | 1731778 | 88  |
| TU-3319 | REV | 1731765 | 1732315 | 550 MU-2183                  | 1732257 grxD           | grxD | 1731778 | 132 |
| TU-3320 | REV | 1731765 | 1732315 | 550 MU-2183                  | 1732284 grxD           | grxD | 1731778 | 159 |
| TU-3321 | REV | 1734490 | 1735315 | 825 MU-2184                  | 1735360 ydhP           | ydhP | 1734145 | 46  |
| TU-3322 | REV | 1735490 | 1735615 | 125 MU-2185                  | 1735601 ynhF           | ynhF | 1735480 | 32  |

|         |     |         |         |                                |                                            |      |         |      |
|---------|-----|---------|---------|--------------------------------|--------------------------------------------|------|---------|------|
| TU-3323 | REV | 1735490 | 1735615 | 125 MU-2185                    | 1735607 ynhF                               | ynhF | 1735480 | 38   |
| TU-3324 | REV | 1735490 | 1735615 | 125 MU-2185                    | 1735639 ynhF                               | ynhF | 1735480 | 70   |
| TU-3325 | REV | 1736815 | 1737890 | 1075 MU-2186                   | 1737837 ydhB                               | ydhB | 1736890 | 15   |
| TU-3326 | REV | 1736815 | 1737890 | 1075 MU-2186                   | 1737851 ydhB                               | ydhB | 1736890 | 29   |
| TU-3327 | REV | 1740615 | 1741440 | 825 MU-2187                    | 1741299 ribC                               | ribC | 1740625 | 33   |
| TU-3328 | REV | 1742490 | 1744390 | 1900 MU-2188                   | 1744226 ydhQ                               | ydhQ | 1742895 | 75   |
| TU-3329 | REV | 1747540 | 1752615 | 5075 MU-2189                   | 1752725 ydhT; ydhU; ydhX; ydhW; ydhV; ydhY | ydhY | 1751875 | 224  |
| TU-3330 | REV | 1752990 | 1753165 | 175 MU-2190                    | 1753189 ydhZ                               | ydhZ | 1752956 | 24   |
| TU-3331 | REV | 1755065 | 1755390 | 325 MU-2191                    | 1755409 NT                                 |      |         |      |
| TU-3332 | REV | 1755740 | 1756865 | 1125 MU-2192                   | 1756883 ynhG                               | ynhG | 1755745 | 134  |
| TU-3333 | REV | 1756965 | 1762495 | 5530 MU-2193                   | 1762442 sufE; sufS; sufD; sufC; sufB; sufA | sufB | 1760546 | 409  |
| TU-3334 | REV | 1756965 | 1762495 | 5530 MU-2193                   | 1762523 sufE; sufS; sufD; sufC; sufB; sufA | sufB | 1760546 | 490  |
| TU-3335 | REV | 1762745 | 1762920 | 175 MU-2194                    | rydB                                       | rydB | 1762737 |      |
| TU-3336 | REV | 1762945 | 1763195 | 250 MU-2195                    | 1763170 ydiH                               | ydiH | 1762958 | -57  |
| TU-3337 | REV | 1763245 | 1766920 | 3675 MU-2196                   | 1766940 ydiI; ydiJ                         | ydiJ | 1763653 | 231  |
| TU-3338 | REV | 1776220 | 1777370 | 1150 MU-2197                   | 1777365 ydiP                               | ydiP | 1776414 | 40   |
| TU-3339 | REV | 1782772 | 1785147 | 2375 MU-2198                   | 1785185 pps                                | pps  | 1782758 | 49   |
| TU-3340 | REV | 1787272 | 1789247 | 1975 MU-2199                   | 1789278 ydiU                               | ydiU | 1787832 | 10   |
| TU-3341 | REV | 1789422 | 1790172 | 750 MU-2200                    | 1790123 ydiV                               | ydiV | 1789331 | 79   |
| TU-3342 | REV | 1789422 | 1790172 | 750 MU-2200                    | 1790180 ydiV                               | ydiV | 1789331 | 136  |
| TU-3343 | REV | 1789422 | 1790172 | 750 MU-2200                    | 1790215 ydiV                               | ydiV | 1789331 | 171  |
| TU-3344 | REV | 1790272 | 1790822 | 550 MU-2201                    | 1790784 nlpC                               | nlpC | 1790291 | 29   |
| TU-3345 | REV | 1790847 | 1792272 | 1425 MU-2202                   | 1792219 btuD; btuC                         | btuE | 1791582 | 86   |
| TU-3346 | REV | 1792297 | 1793172 | 875 MU-2203                    | 1793201 btuC                               | btuC | 1792196 | 25   |
| TU-3347 | REV | 1793272 | 1793672 | 400 MU-2204                    | 1793744 ihfA                               | ihfA | 1793277 | 168  |
| TU-3348 | REV | 1793272 | 1793672 | 400 MU-2204                    | 1793791 ihfA                               | ihfA | 1793277 | 215  |
| TU-3349 | REV | 1793697 | 1797272 | 3575 MU-2205                   | 1797159 pheT; pheS; pheM                   | pheM | 1797250 | -135 |
| TU-3350 | REV | 1793697 | 1797272 | 3575 MU-2205                   | 1797217 pheT; pheS; pheM                   | pheM | 1797250 | -77  |
| TU-3351 | REV | 1793697 | 1797272 | 3575 MU-2205                   | 1797274 pheT; pheS; pheM                   | pheM | 1797250 | -20  |
| TU-3352 | REV | 1793697 | 1797272 | 3575 MU-2205                   | 1797327 pheT; pheS; pheM                   | pheM | 1797250 | 33   |
| TU-3353 | REV | 1797347 | 1797772 | 425 MU-2206                    | 1797807 rplT                               | rplT | 1797417 | 34   |
| TU-3354 | REV | 1797347 | 1798072 | 725 MU-2206; MU-2207           | 1798126 rplT; rpmI                         | rpmI | 1797826 | 103  |
| TU-3355 | REV | 1797347 | 1798072 | 725 MU-2206; MU-2207           | 1798135 rplT; rpmI                         | rpmI | 1797826 | 112  |
| TU-3356 | REV | 1797347 | 1798072 | 725 MU-2206; MU-2207           | 1798300 rplT; rpmI                         | rpmI | 1797826 | 277  |
| TU-3357 | REV | 1797347 | 1798072 | 725 MU-2206; MU-2207           | 1798314 rplT; rpmI                         | rpmI | 1797826 | 291  |
| TU-3358 | REV | 1797347 | 1798072 | 725 MU-2206; MU-2207           | 1798355 rplT; rpmI                         | rpmI | 1797826 | 332  |
| TU-3359 | REV | 1797347 | 1798072 | 725 MU-2206; MU-2207           | 1798394 rplT; rpmI                         | rpmI | 1797826 | 371  |
| TU-3360 | REV | 1797347 | 1798697 | 1350 MU-2206; MU-2207; MU-2208 | 1798841 rplT; rpmI; infC                   | infC | 1798120 | 179  |
| TU-3361 | REV | 1798097 | 1800797 | 2700 MU-2208; MU-2209          | 1800756 infC; thrS                         | thrS | 1798666 | 162  |
| TU-3362 | REV | 1803397 | 1804172 | 775 MU-2210                    | 1804192 ydiY                               | ydiY | 1803349 | 85   |
| TU-3363 | REV | 1806422 | 1807347 | 925 MU-2211                    | 1807286 yniB                               | yniB | 1806721 | 29   |
| TU-3364 | REV | 1806422 | 1807347 | 925 MU-2211                    | 1807374 yniB                               | yniB | 1806721 | 117  |
| TU-3365 | REV | 1810353 | 1811168 | 815 MU-2212                    | ydjO                                       | ydjO | 1810353 |      |
| TU-3366 | REV | 1811554 | 1811679 | 125 MU-2213                    | 1811716 cedA                               | cedA | 1811445 | 29   |
| TU-3367 | REV | 1814179 | 1815354 | 1175 MU-2214                   | 1815394 chbG                               | chbG | 1814410 | 235  |
| TU-3368 | REV | 1814179 | 1819735 | 5556 MU-2214; MU-2215          | 1819667 chbG; chbF; chbR; chbA; chbC; chbB | chbB | 1819323 | 24   |

|         |     |         |         |                              |                                       |      |         |     |
|---------|-----|---------|---------|------------------------------|---------------------------------------|------|---------|-----|
| TU-3369 | REV | 1814179 | 1819735 | 5556 MU-2214;MU-2215         | 1819750 chbG;chbF;chbR;chbA;chbC;chbB | chbB | 1819323 | 107 |
| TU-3370 | REV | 1819910 | 1820285 | 375 MU-2216                  | 1820301 osmE                          | osmE | 1819942 | 21  |
| TU-3371 | REV | 1819910 | 1820285 | 375 MU-2216                  | 1820307 osmE                          | osmE | 1819942 | 27  |
| TU-3372 | REV | 1822535 | 1822960 | 425 MU-2217                  | 1823147 ves                           | ves  | 1822386 | 186 |
| TU-3373 | REV | 1823110 | 1823735 | 625 MU-2218                  | 1823713 spy                           | spy  | 1823164 | 64  |
| TU-3374 | REV | 1823110 | 1823735 | 625 MU-2218                  | 1823756 spy                           | spy  | 1823164 | 107 |
| TU-3375 | REV | 1824085 | 1830010 | 5925 MU-2219                 | 1830028 astE;astB;astD;astA;astC      | astC | 1828786 | 22  |
| TU-3376 | REV | 1831185 | 1832185 | 1000 MU-2220                 | 1832126 NT                            |      |         |     |
| TU-3377 | REV | 1838860 | 1839435 | 575 MU-2221                  | 1839469 ynjF                          | ynjF | 1838807 | 42  |
| TU-3378 | REV | 1839860 | 1840210 | 350 MU-2222                  | 1840186 ynjH                          | ynjH | 1839887 | 27  |
| TU-3379 | REV | 1841910 | 1841960 | 50 MU-2223                   | 1842041 NT                            |      |         |     |
| TU-3380 | REV | 1841855 | 1842895 | 1040 MU-2224                 | ynjI                                  | ynjI | 1841855 |     |
| TU-3381 | REV | 1843035 | 1846235 | 3200 MU-2225                 | 1846054 topB;selD                     | selD | 1844989 | 22  |
| TU-3382 | REV | 1843035 | 1846710 | 3675 MU-2225;MU-2226         | 1846726 topB;selD;ydjA                | ydjA | 1846149 | 26  |
| TU-3383 | REV | 1850645 | 1852003 | 1358 MU-2227                 | ydjE                                  | ydjE | 1850645 |     |
| TU-3384 | REV | 1852260 | 1852885 | 625 MU-2228                  | 1852910 ydjF                          | ydjF | 1852120 | 32  |
| TU-3385 | REV | 1853015 | 1859356 | 6341 MU-2229                 | ydjG;ydjH;ydjI;ydjJ;ydjK;ydjL         | ydjL | 1858280 |     |
| TU-3386 | REV | 1859660 | 1860460 | 800 MU-2230                  | 1860488 yeaC;msrB                     | msrB | 1860040 | 35  |
| TU-3387 | REV | 1862810 | 1863685 | 875 MU-2231                  | 1863677 yeaE                          | yeaE | 1862806 | 17  |
| TU-3388 | REV | 1863735 | 1864643 | 908 MU-2232                  | 1864528 mipA                          | mipA | 1863750 | 32  |
| TU-3389 | REV | 1872102 | 1872206 | 104 MU-2233                  | yoaI                                  | yoaI | 1872102 |     |
| TU-3390 | REV | 1872793 | 1873593 | 800 MU-2234                  | 1873622 yeaM                          | yeaM | 1872779 | 22  |
| TU-3391 | REV | 1872793 | 1873593 | 800 MU-2234                  | 1873636 yeaM                          | yeaM | 1872779 | 36  |
| TU-3392 | REV | 1875193 | 1875543 | 350 MU-2235                  | 1875579 yoaF                          | yoaF | 1875302 | 23  |
| TU-3393 | REV | 1875193 | 1875543 | 350 MU-2235                  | 1875669 yoaF                          | yoaF | 1875302 | 113 |
| TU-3394 | REV | 1876893 | 1877293 | 400 MU-2236                  | 1877294 yeaQ                          | yeaQ | 1877031 | 15  |
| TU-3395 | REV | 1876893 | 1877293 | 400 MU-2236                  | 1877321 yeaQ                          | yeaQ | 1877031 | 42  |
| TU-3396 | REV | 1877343 | 1877643 | 300 MU-2237                  | yoaG;yeaR                             | yeaR | 1877613 |     |
| TU-3397 | REV | 1878168 | 1878793 | 625 MU-2238                  | leuE                                  | leuE | 1878145 |     |
| TU-3398 | REV | 1878968 | 1879843 | 875 MU-2239                  | 1879872 yeaT                          | yeaT | 1878910 | 39  |
| TU-3399 | REV | 1884968 | 1886018 | 1050 MU-2240                 | 1886087 rnd                           | rnd  | 1884888 | 72  |
| TU-3400 | REV | 1886041 | 1886126 | 85 MU-2241                   | 1886158 sroD                          | sroD | 1886041 | 32  |
| TU-3401 | REV | 1886068 | 1887918 | 1850 MU-2242                 | 1887831 fadD                          | fadD | 1886085 | 61  |
| TU-3402 | REV | 1888043 | 1888568 | 525 MU-2243                  | yeaY                                  | yeaY | 1887975 |     |
| TU-3403 | REV | 1888043 | 1889293 | 1250 MU-2243;MU-2244         | 1889319 yeaY;yeaZ                     | yeaZ | 1888596 | 28  |
| TU-3404 | REV | 1888043 | 1891243 | 3200 MU-2243;MU-2244;MU-2245 | 1891279 yeaY;yeaZ;yoaA                | yoaA | 1889349 | 20  |
| TU-3405 | REV | 1892493 | 1892843 | 350 MU-2246                  | 1892777 yoaH                          | yoaH | 1892576 | 22  |
| TU-3406 | REV | 1892893 | 1893520 | 627 MU-2247                  | 1893573 NT                            |      |         |     |
| TU-3407 | REV | 1896370 | 1896470 | 100 MU-2248                  | 1896478 NT                            |      |         |     |
| TU-3408 | REV | 1898070 | 1899770 | 1700 MU-2249                 | 1899796 yoaE                          | yoaE | 1898053 | 187 |
| TU-3409 | REV | 1904370 | 1905145 | 775 MU-2250                  | 1905108 rrmA                          | rrmA | 1904275 | 24  |
| TU-3410 | REV | 1905195 | 1905795 | 600 MU-2251                  | 1905623 cspC;yobF                     | yobF | 1905472 | 8   |
| TU-3411 | REV | 1905195 | 1905795 | 600 MU-2251                  | 1905642 cspC;yobF                     | yobF | 1905472 | 27  |
| TU-3412 | REV | 1906195 | 1906795 | 600 MU-2252                  | 1906816 yebO;mgrB                     | mgrB | 1906647 | 26  |
| TU-3413 | REV | 1907070 | 1908245 | 1175 MU-2253                 | 1908154 kdgR                          | kdgR | 1907332 | 31  |
| TU-3414 | REV | 1907070 | 1908245 | 1175 MU-2253                 | 1908162 kdgR                          | kdgR | 1907332 | 39  |

|         |     |         |         |                      |                                                    |      |         |     |
|---------|-----|---------|---------|----------------------|----------------------------------------------------|------|---------|-----|
| TU-3415 | REV | 1909720 | 1910745 | 1025 MU-2254         | 1910628 htpX                                       | htpX | 1909719 | 28  |
| TU-3416 | REV | 1909720 | 1910745 | 1025 MU-2254         | 1910642 htpX                                       | htpX | 1909719 | 42  |
| TU-3417 | REV | 1910795 | 1913720 | 2925 MU-2255         | 1913679 prc;proQ                                   | proQ | 1912860 | 121 |
| TU-3418 | REV | 1910795 | 1914170 | 3375 MU-2255;MU-2256 | 1914138 prc;proQ;yebR                              | yebR | 1913655 | -14 |
| TU-3419 | REV | 1910795 | 1914170 | 3375 MU-2255;MU-2256 | 1914188 prc;proQ;yebR                              | yebR | 1913655 | 36  |
| TU-3420 | REV | 1920121 | 1921046 | 925 MU-2257          | pphA                                               | pphA | 1920337 |     |
| TU-3421 | REV | 1921121 | 1921246 | 125 MU-2258          | ryeB                                               | ryeB | 1921188 |     |
| TU-3422 | REV | 1921421 | 1922996 | 1575 MU-2259         | 1923017 yebY;yebZ;yobA                             | yobA | 1922619 | 24  |
| TU-3423 | REV | 1923046 | 1923321 | 275 MU-2260          | 1923331 NT                                         |      |         |     |
| TU-3424 | REV | 1924971 | 1926921 | 1950 MU-2261         | 1926889 ptrB                                       | ptrB | 1924803 | 26  |
| TU-3425 | REV | 1927096 | 1927721 | 625 MU-2262          | 1927758 yebE                                       | yebE | 1927072 | 27  |
| TU-3426 | REV | 1927846 | 1928421 | 575 MU-2263          | 1928440 yebF                                       | yebF | 1928058 | 26  |
| TU-3427 | REV | 1927846 | 1928771 | 925 MU-2263;MU-2264  | 1928790 yebF;yebG                                  | yebG | 1928481 | 19  |
| TU-3428 | REV | 1930146 | 1931121 | 975 MU-2265          | 1930807 eda                                        | eda  | 1930139 | 27  |
| TU-3429 | REV | 1930146 | 1931121 | 975 MU-2265          | 1930823 eda                                        | eda  | 1930139 | 43  |
| TU-3430 | REV | 1930146 | 1931121 | 975 MU-2265          | 1931066 eda                                        | eda  | 1930139 | 286 |
| TU-3431 | REV | 1931171 | 1932671 | 1500 MU-2266         | 1932737 edd                                        | edd  | 1930817 | 109 |
| TU-3432 | REV | 1932896 | 1934499 | 1603 MU-2267         | 1934383 zwf                                        | zwf  | 1932863 | 45  |
| TU-3433 | REV | 1932896 | 1934499 | 1603 MU-2267         | 1934391 zwf                                        | zwf  | 1932863 | 53  |
| TU-3434 | REV | 1932896 | 1934499 | 1603 MU-2267         | 1934398 zwf                                        | zwf  | 1932863 | 60  |
| TU-3435 | REV | 1932896 | 1934499 | 1603 MU-2267         | 1934491 zwf                                        | zwf  | 1932863 | 153 |
| TU-3436 | REV | 1937274 | 1938249 | 975 MU-2268          | 1938245 lpxM                                       | lpxM | 1937246 | 28  |
| TU-3437 | REV | 1937274 | 1938249 | 975 MU-2268          | 1938252 lpxM                                       | lpxM | 1937246 | 35  |
| TU-3438 | REV | 1938349 | 1940624 | 2275 MU-2269         | 1940621 yebA;znuA                                  | znuA | 1939675 | 14  |
| TU-3439 | REV | 1938349 | 1940624 | 2275 MU-2269         | 1940637 yebA;znuA                                  | znuA | 1939675 | 30  |
| TU-3440 | REV | 1942374 | 1944099 | 1725 MU-2270         | 1944032 ruvB;ruvA                                  | ruvA | 1943389 | 32  |
| TU-3441 | REV | 1942374 | 1944099 | 1725 MU-2270         | 1944149 ruvB;ruvA                                  | ruvA | 1943389 | 149 |
| TU-3442 | REV | 1944724 | 1945274 | 550 MU-2271          | ruvC                                               | ruvC | 1944879 |     |
| TU-3443 | REV | 1945324 | 1948824 | 3500 MU-2272         | 1948641 yebC;nudB;aspS                             | aspS | 1946774 | 95  |
| TU-3444 | REV | 1952624 | 1955399 | 2775 MU-2273         | torZ;torY                                          | torY | 1955056 |     |
| TU-3445 | REV | 1956499 | 1957924 | 1425 MU-2274         | 1957896 cutC;yecM                                  | yecM | 1957304 | 26  |
| TU-3446 | REV | 1961274 | 1970699 | 9425 MU-2275         | 1970739 flhE;flhA;flhB;cheZ;cheY;cheB;cheR;tap;tar | tar  | 1969054 | 24  |
| TU-3447 | REV | 1972574 | 1975149 | 2575 MU-2276         | 1975324 cheW;cheA;motB;motA                        | motA | 1974276 | 161 |
| TU-3448 | REV | 1975224 | 1976474 | 1250 MU-2277         | 1976303 flhC;flhD                                  | flhD | 1975871 | 82  |
| TU-3449 | REV | 1975224 | 1976474 | 1250 MU-2277         | 1976309 flhC;flhD                                  | flhD | 1975871 | 88  |
| TU-3450 | REV | 1976549 | 1977274 | 725 MU-2278          | insB;insA                                          | insA | 1976964 |     |
| TU-3451 | REV | 1978049 | 1979699 | 1650 MU-2279         | 1979674 otsA                                       | otsA | 1978212 | 38  |
| TU-3452 | REV | 1978049 | 1980449 | 2400 MU-2279;MU-2280 | 1980464 otsA;otsB                                  | otsB | 1979611 | 53  |
| TU-3453 | REV | 1980549 | 1982049 | 1500 MU-2281         | araH                                               | araH | 1980578 |     |
| TU-3454 | REV | 1980549 | 1984202 | 3653 MU-2281;MU-2282 | araH;araG;araF                                     | araF | 1983163 |     |
| TU-3455 | REV | 1985552 | 1985852 | 300 MU-2283          | 1985809 yecJ                                       | yecJ | 1985531 | 27  |
| TU-3456 | REV | 1985902 | 1986027 | 125 MU-2284          | 1986026 isrB                                       | isrB | 1985863 | 4   |
| TU-3457 | REV | 1987277 | 1987502 | 225 MU-2285          | 1987525 yecH                                       | yecH | 1987275 | 11  |
| TU-3458 | REV | 1988727 | 1989752 | 1025 MU-2286         | 1989673 yecA                                       | yecA | 1988978 | 30  |
| TU-3459 | REV | 1989802 | 1990077 | 275 MU-2287          | 1990141 leuZ;cysT;glyW                             | glyW | 1990066 | 0   |
| TU-3460 | REV | 1990102 | 1990852 | 750 MU-2288          | 1990874 pgsA                                       | pgsA | 1990293 | 33  |

|         |     |         |         |                      |                        |      |         |      |
|---------|-----|---------|---------|----------------------|------------------------|------|---------|------|
| TU-3461 | REV | 1990977 | 1993403 | 2426 MU-2289         | 1993427 uvrC;uvrY      | uvrY | 1992727 | 44   |
| TU-3462 | REV | 1990977 | 1993403 | 2426 MU-2289         | 1993595 uvrC;uvrY      | uvrY | 1992727 | 212  |
| TU-3463 | REV | 1994180 | 1994855 | 675 MU-2290          | 1994917 sdiA           | sdiA | 1994134 | 61   |
| TU-3464 | REV | 1994180 | 1994855 | 675 MU-2290          | 1994934 sdiA           | sdiA | 1994134 | 78   |
| TU-3465 | REV | 1995105 | 1996530 | 1425 MU-2291         | 1996664 yecC;yecS      | yecS | 1995835 | 161  |
| TU-3466 | REV | 1995105 | 1997555 | 2450 MU-2291;MU-2292 | 1997532 yecC;yecS;dcyD | dcyD | 1996518 | 28   |
| TU-3467 | REV | 1997580 | 1998580 | 1000 MU-2293         | 1998422 fliY           | fliY | 1997609 | 13   |
| TU-3468 | REV | 1997580 | 1998580 | 1000 MU-2293         | 1998434 fliY           | fliY | 1997609 | 25   |
| TU-3469 | REV | 1997580 | 1998580 | 1000 MU-2293         | 1998492 fliY           | fliY | 1997609 | 83   |
| TU-3470 | REV | 1998855 | 1999805 | 950 MU-2294          | 1999843 fliZ;fliA      | fliA | 1999094 | 30   |
| TU-3471 | REV | 1999963 | 2001688 | 1725 MU-2295         | 2001653 fliC           | fliC | 2000134 | 23   |
| TU-3472 | REV | 1999963 | 2001688 | 1725 MU-2295         | 2001699 fliC           | fliC | 2000134 | 69   |
| TU-3473 | REV | 2005698 | 2006198 | 500 MU-2296          | 2006138 yedD           | yedD | 2005701 | 24   |
| TU-3474 | REV | 2009247 | 2010375 | 1128 MU-2297         | yedN                   | yedN | 2009247 |      |
| TU-3475 | REV | 2010724 | 2011038 | 314 MU-2298          | fliE                   | fliE | 2010724 |      |
| TU-3476 | REV | 2022677 | 2023002 | 325 MU-2299          | 2022868 dsrB           | dsrB | 2022659 | 21   |
| TU-3477 | REV | 2023277 | 2023377 | 100 MU-2300          | dsrA                   | dsrA | 2023251 |      |
| TU-3478 | REV | 2024277 | 2026152 | 1875 MU-2301         | 2026237 yedQ           | yedQ | 2024347 | 196  |
| TU-3479 | REV | 2026202 | 2027377 | 1175 MU-2302         | 2027413 yodC;yedI      | yedI | 2026473 | 23   |
| TU-3480 | REV | 2028377 | 2030327 | 1950 MU-2303         | 2030365 vsr;dcM        | dcM  | 2028923 | 24   |
| TU-3481 | REV | 2030377 | 2031452 | 1075 MU-2304         | 2031465 yedJ;yedR      | yedR | 2031143 | -43  |
| TU-3482 | REV | 2030377 | 2031452 | 1075 MU-2304         | 2031494 yedJ;yedR      | yedR | 2031143 | -14  |
| TU-3483 | REV | 2034852 | 2036802 | 1950 MU-2305         | 2036840 yedV;yedW      | yedW | 2036176 | -7   |
| TU-3484 | REV | 2038577 | 2039327 | 750 MU-2306          | 2039280 NT             |      |         |      |
| TU-3485 | REV | 2041462 | 2041564 | 102 MU-2307          | 2041581 serU           | serU | 2041492 | 0    |
| TU-3486 | REV | 2050339 | 2051589 | 1250 MU-2308         | 2051659 yeeL           | yeeL | 2050300 | 307  |
| TU-3487 | REV | 2056055 | 2056105 | 50 MU-2309           | 2056126 asnW           | asnW | 2056051 | 0    |
| TU-3488 | REV | 2056305 | 2057859 | 1554 MU-2310         | 2057871 yeeO           | yeeO | 2056227 | 1    |
| TU-3489 | REV | 2057984 | 2058984 | 1000 MU-2311         | 2058964 cbl            | cbl  | 2057988 | 26   |
| TU-3490 | REV | 2057984 | 2060009 | 2025 MU-2311;MU-2312 | 2060074 cbl;nac        | nac  | 2059040 | 117  |
| TU-3491 | REV | 2060409 | 2061359 | 950 MU-2313          | 2061377 erfK           | erfK | 2060415 | 30   |
| TU-3492 | REV | 2061409 | 2063984 | 2575 MU-2314         | 2064019 cobT;cobS;cobU | cobU | 2063243 | 231  |
| TU-3493 | REV | 2061409 | 2063984 | 2575 MU-2314         | 2064031 cobT;cobS;cobU | cobU | 2063243 | 243  |
| TU-3494 | REV | 2064109 | 2064109 | 0 MU-2315            | yeeH                   | yeeH | 2064092 |      |
| TU-3495 | REV | 2064209 | 2065459 | 1250 MU-2316         | 2065503 insH           | insH | 2064329 | 158  |
| TU-3496 | REV | 2065509 | 2066484 | 975 MU-2317          | 2066314 yoeG;yoeH      | yoeH | 2066285 | -129 |
| TU-3497 | REV | 2065509 | 2066484 | 975 MU-2317          | 2066507 yoeG;yoeH      | yoeH | 2066285 | 64   |
| TU-3498 | REV | 2066759 | 2068209 | 1450 MU-2318         | 2068377 insD;insC      | insC | 2067839 | 173  |
| TU-3499 | REV | 2072411 | 2072736 | 325 MU-2319          | 2072764 NT             |      |         |      |
| TU-3500 | REV | 2075861 | 2075986 | 125 MU-2320          | 2076010 NT             |      |         |      |
| TU-3501 | REV | 2076573 | 2076701 | 128 MU-2321          | yoeD                   | yoeD | 2076573 |      |
| TU-3502 | REV | 2077061 | 2077586 | 525 MU-2322          | 2077410 yeeX           | yeeX | 2077056 | 25   |
| TU-3503 | REV | 2077061 | 2077586 | 525 MU-2322          | 2077416 yeeX           | yeeX | 2077056 | 31   |
| TU-3504 | REV | 2077061 | 2077586 | 525 MU-2322          | 2077428 yeeX           | yeeX | 2077056 | 43   |
| TU-3505 | REV | 2077061 | 2077586 | 525 MU-2322          | 2077440 yeeX           | yeeX | 2077056 | 55   |
| TU-3506 | REV | 2077061 | 2077586 | 525 MU-2322          | 2077492 yeeX           | yeeX | 2077056 | 107  |

|         |     |         |         |                                               |                                                                                |      |         |     |
|---------|-----|---------|---------|-----------------------------------------------|--------------------------------------------------------------------------------|------|---------|-----|
| TU-3507 | REV | 2077061 | 2077586 | 525 MU-2322                                   | 2077541 yeeX                                                                   | yeeX | 2077056 | 156 |
| TU-3508 | REV | 2077611 | 2079336 | 1725 MU-2323                                  | 2079301 yeeA;sbmC                                                              | sbmC | 2078813 | 15  |
| TU-3509 | REV | 2077611 | 2079336 | 1725 MU-2323                                  | 2079343 yeeA;sbmC                                                              | sbmC | 2078813 | 57  |
| TU-3510 | REV | 2077611 | 2079336 | 1725 MU-2323                                  | 2079350 yeeA;sbmC                                                              | sbmC | 2078813 | 64  |
| TU-3511 | REV | 2079411 | 2080286 | 875 MU-2324                                   | dacD                                                                           | dacD | 2079405 |     |
| TU-3512 | REV | 2082261 | 2083536 | 1275 MU-2325                                  | 2083525 yeeD;yeeE                                                              | yeeE | 2082491 | -24 |
| TU-3513 | REV | 2082261 | 2083536 | 1275 MU-2325                                  | 2083552 yeeD;yeeE                                                              | yeeE | 2082491 | 3   |
| TU-3514 | REV | 2082261 | 2083536 | 1275 MU-2325                                  | 2083576 yeeD;yeeE                                                              | yeeE | 2082491 | 27  |
| TU-3515 | REV | 2083736 | 2085286 | 1550 MU-2326                                  | 2085346 yeeF                                                                   | yeeF | 2083728 | 260 |
| TU-3516 | REV | 2085311 | 2087186 | 1875 MU-2327                                  | 2087176 yeeY;yeeZ                                                              | yeeZ | 2086328 | 24  |
| TU-3517 | REV | 2087236 | 2087861 | 625 MU-2328                                   | 2087755 yoeB;yefM                                                              | yefM | 2087486 | 18  |
| TU-3518 | REV | 2095236 | 2096397 | 1161 MU-2329                                  | 2096336 cld                                                                    | cld  | 2095345 | 11  |
| TU-3519 | REV | 2095236 | 2096397 | 1161 MU-2329                                  | 2096346 cld                                                                    | cld  | 2095345 | 21  |
| TU-3520 | REV | 2095236 | 2096397 | 1161 MU-2329                                  | 2096355 cld                                                                    | cld  | 2095345 | 30  |
| TU-3521 | REV | 2096497 | 2097722 | 1225 MU-2330                                  | 2097696 ugd                                                                    | ugd  | 2096471 | 59  |
| TU-3522 | REV | 2097872 | 2099272 | 1400 MU-2331                                  | 2099348 gnd                                                                    | gnd  | 2097886 | 56  |
| TU-3523 | REV | 2097872 | 2099272 | 1400 MU-2331                                  | 2099381 gnd                                                                    | gnd  | 2097886 | 89  |
| TU-3524 | REV | 2099297 | 2099722 | 425 MU-2332                                   | wbbL                                                                           | wbbL | 2099420 |     |
| TU-3525 | REV | 2099772 | 2100822 | 1050 MU-2333                                  | 2100996 insH                                                                   | insH | 2099919 | 61  |
| TU-3526 | REV | 2099772 | 2100822 | 1050 MU-2333                                  | 2101009 insH                                                                   | insH | 2099919 | 74  |
| TU-3527 | REV | 2100847 | 2103222 | 2375 MU-2334                                  | 2103361 wbbL;wbbK;wbbJ                                                         | wbbJ | 2102518 | 253 |
| TU-3528 | REV | 2100847 | 2106408 | 5561 MU-2334;MU-2335                          | 2106453 wbbL;wbbK;wbbJ;wbbI;rfc;glf                                            | glf  | 2105250 | 100 |
| TU-3529 | REV | 2100847 | 2106408 | 5561 MU-2334;MU-2335                          | 2106482 wbbL;wbbK;wbbJ;wbbI;rfc;glf                                            | glf  | 2105250 | 129 |
| TU-3530 | REV | 2100847 | 2106408 | 5561 MU-2334;MU-2335                          | 2106493 wbbL;wbbK;wbbJ;wbbI;rfc;glf                                            | glf  | 2105250 | 140 |
| TU-3531 | REV | 2100847 | 2106408 | 5561 MU-2334;MU-2335                          | 2106518 wbbL;wbbK;wbbJ;wbbI;rfc;glf                                            | glf  | 2105250 | 165 |
| TU-3532 | REV | 2100847 | 2107883 | 7036 MU-2334;MU-2335;MU-2336                  | 2107775 wbbL;wbbK;wbbJ;wbbI;rfc;glf;rfbX                                       | rfbX | 2106361 | 167 |
| TU-3533 | REV | 2100847 | 2107883 | 7036 MU-2334;MU-2335;MU-2336                  | 2107921 wbbL;wbbK;wbbJ;wbbI;rfc;glf;rfbX                                       | rfbX | 2106361 | 313 |
| TU-3534 | REV | 2100847 | 2107883 | 7036 MU-2334;MU-2335;MU-2336                  | 2107951 wbbL;wbbK;wbbJ;wbbI;rfc;glf;rfbX                                       | rfbX | 2106361 | 343 |
| TU-3535 | REV | 2100847 | 2109260 | 8413 MU-2334;MU-2335;MU-2336;MU-2337          | 2109097 wbbL;wbbK;wbbJ;wbbI;rfc;glf;rfbX;rfbC;rfbA                             | rfbA | 2108162 | 54  |
| TU-3536 | REV | 2100847 | 2109260 | 8413 MU-2334;MU-2335;MU-2336;MU-2337          | 2109105 wbbL;wbbK;wbbJ;wbbI;rfc;glf;rfbX;rfbC;rfbA                             | rfbA | 2108162 | 62  |
| TU-3537 | REV | 2100847 | 2109260 | 8413 MU-2334;MU-2335;MU-2336;MU-2337          | 2109125 wbbL;wbbK;wbbJ;wbbI;rfc;glf;rfbX;rfbC;rfbA                             | rfbA | 2108162 | 82  |
| TU-3538 | REV | 2100847 | 2111360 | 10513 MU-2334;MU-2335;MU-2336;MU-2337;MU-2338 | 2111256 wbbL;wbbK;wbbJ;wbbI;rfc;glf;rfbX;rfbC;rfbA;rfbD;rfbB                   | rfbB | 2110000 | 171 |
| TU-3539 | REV | 2111410 | 2112610 | 1200 MU-2339                                  | 2112375 galF                                                                   | galF | 2111458 | 24  |
| TU-3540 | REV | 2111410 | 2112610 | 1200 MU-2339                                  | 2112440 galF                                                                   | galF | 2111458 | 89  |
| TU-3541 | REV | 2112526 | 2116428 | 3902 MU-2340                                  | wcaM;wcaL;wcaK                                                                 | wcaK | 2115148 |     |
| TU-3542 | REV | 2116704 | 2135267 | 18563 MU-2341                                 | wzxC;wcaJ;cpsG;cpsB;wcaI;gmm;fcl;gmd;wcaF;wcaE;wcaD;wcaC;wcaB;wcaA;wzc;wzb;wza | wza  | 2134128 |     |
| TU-3543 | REV | 2137791 | 2140266 | 2475 MU-2342                                  | 2140303 asmA;dcd                                                               | dcd  | 2139658 | 64  |
| TU-3544 | REV | 2140291 | 2140991 | 700 MU-2343                                   | 2141004 udk                                                                    | udk  | 2140331 | 32  |
| TU-3545 | REV | 2140291 | 2140991 | 700 MU-2343                                   | 2141028 udk                                                                    | udk  | 2140331 | 56  |
| TU-3546 | REV | 2144716 | 2145666 | 950 MU-2344                                   | 2145583 alka                                                                   | alka | 2144716 | 19  |

|         |     |         |         |                      |                                       |      |         |     |
|---------|-----|---------|---------|----------------------|---------------------------------------|------|---------|-----|
| TU-3547 | REV | 2147166 | 2148916 | 1750 MU-2345         | 2149011 yegI                          | yegI | 2147063 | 2   |
| TU-3548 | REV | 2147166 | 2148916 | 1750 MU-2345         | 2149067 yegI                          | yegI | 2147063 | 58  |
| TU-3549 | REV | 2149735 | 2151152 | 1417 MU-2346         | yegK;yegL                             | yegL | 2150493 |     |
| TU-3550 | REV | 2165341 | 2165541 | 200 MU-2347          | 2165572 ogrK                          | ogrK | 2165326 | 28  |
| TU-3551 | REV | 2165626 | 2166330 | 704 MU-2348          | yegZ;yegR                             | yegR | 2166013 |     |
| TU-3552 | REV | 2167441 | 2168341 | 900 MU-2349          | gatR                                  | gatR | 2167717 |     |
| TU-3553 | REV | 2169016 | 2169691 | 675 MU-2350          | 2169773 gatR                          | gatR | 2169453 | 22  |
| TU-3554 | REV | 2169716 | 2175241 | 5525 MU-2351         | 2175234 gatD;gatC;gatB;gatA;gatZ;gatY | gatY | 2174372 | 8   |
| TU-3555 | REV | 2169716 | 2175241 | 5525 MU-2351         | 2175250 gatD;gatC;gatB;gatA;gatZ;gatY | gatY | 2174372 | 24  |
| TU-3556 | REV | 2169716 | 2175241 | 5525 MU-2351         | 2175256 gatD;gatC;gatB;gatA;gatZ;gatY | gatY | 2174372 | 30  |
| TU-3557 | REV | 2175391 | 2176641 | 1250 MU-2352         | 2176631 fbaB                          | fbaB | 2175534 | 45  |
| TU-3558 | REV | 2175391 | 2176641 | 1250 MU-2352         | 2176655 fbaB                          | fbaB | 2175534 | 69  |
| TU-3559 | REV | 2179991 | 2181016 | 1025 MU-2353         | 2180828 yegW                          | yegW | 2180057 | 25  |
| TU-3560 | REV | 2181116 | 2183591 | 2475 MU-2354         | 2183456 yegX;thiD;thiM                | thiM | 2182535 | 133 |
| TU-3561 | REV | 2181116 | 2183591 | 2475 MU-2354         | 2183473 yegX;thiD;thiM                | thiM | 2182535 | 150 |
| TU-3562 | REV | 2183641 | 2183816 | 175 MU-2355          | 2183843 rcnR                          | rcnR | 2183546 | 25  |
| TU-3563 | REV | 2185416 | 2190216 | 4800 MU-2356         | 2190296 yehA;yehB;yehC;yehD           | yehD | 2189702 | 52  |
| TU-3564 | REV | 2190516 | 2190866 | 350 MU-2357          | 2190865 yehE                          | yehE | 2190537 | 47  |
| TU-3565 | REV | 2191116 | 2192191 | 1075 MU-2358         | 2192222 mrp                           | mrp  | 2191081 | 32  |
| TU-3566 | REV | 2208866 | 2209191 | 325 MU-2359          | 2209224 NT                            |      |         |     |
| TU-3567 | REV | 2209866 | 2210291 | 425 MU-2360          | 2210248 yehS                          | yehS | 2209748 | 30  |
| TU-3568 | REV | 2210366 | 2212643 | 2277 MU-2361         | 2212693 yehT;yehU                     | yehU | 2210981 | 27  |
| TU-3569 | REV | 2213718 | 2217668 | 3950 MU-2362         | 2217545 yehW;yehX;yehY;osmF           | osmF | 2216586 | 42  |
| TU-3570 | REV | 2217718 | 2220043 | 2325 MU-2363         | 2220064 bglX                          | bglX | 2217714 | 53  |
| TU-3571 | REV | 2221843 | 2222993 | 1150 MU-2364         | 2222949 pbpG                          | pbpG | 2221960 | 57  |
| TU-3572 | REV | 2223043 | 2223668 | 625 MU-2365          | 2223673 yohC                          | yohC | 2223066 | 20  |
| TU-3573 | REV | 2223043 | 2223668 | 625 MU-2365          | 2223686 yohC                          | yohC | 2223066 | 33  |
| TU-3574 | REV | 2224518 | 2225293 | 775 MU-2366          | 2225320 yohF                          | yohF | 2224531 | 28  |
| TU-3575 | REV | 2225345 | 2226780 | 1435 MU-2367         | mdtQ                                  | mdtQ | 2225345 |     |
| TU-3576 | REV | 2227268 | 2228393 | 1125 MU-2368         | 2228423 dusC                          | dusC | 2227460 | 16  |
| TU-3577 | REV | 2227268 | 2228393 | 1125 MU-2368         | 2228429 dusC                          | dusC | 2227460 | 22  |
| TU-3578 | REV | 2234571 | 2236146 | 1575 MU-2369         | 2236029 mgIC                          | mgIC | 2234765 | 254 |
| TU-3579 | REV | 2234571 | 2238671 | 4100 MU-2369;MU-2370 | 2238475 mgIC;mgIA;mgIB                | mgIB | 2237372 | 105 |
| TU-3580 | REV | 2238996 | 2241796 | 2800 MU-2371         | 2241821 galS;yeiB;folE                | folE | 2241006 | 147 |
| TU-3581 | REV | 2242671 | 2244946 | 2275 MU-2372         | 2244951 cirA                          | cirA | 2242800 | 160 |
| TU-3582 | REV | 2245096 | 2246646 | 1550 MU-2373         | 2246582 lysP                          | lysP | 2245085 | 28  |
| TU-3583 | REV | 2246746 | 2247696 | 950 MU-2374          | 2247664 yeiE                          | yeiE | 2246759 | 24  |
| TU-3584 | REV | 2247746 | 2247921 | 175 MU-2375          | 2247938 NT                            |      |         |     |
| TU-3585 | REV | 2250917 | 2253208 | 2291 MU-2376         | nupX;rihB                             | rihB | 2252267 |     |
| TU-3586 | REV | 2254107 | 2255357 | 1250 MU-2377         | yeiM                                  | yeiM | 2254107 |     |
| TU-3587 | REV | 2255451 | 2257318 | 1867 MU-2378         | yeiN;yeiC                             | yeiC | 2256377 |     |
| TU-3588 | REV | 2257496 | 2261596 | 4100 MU-2379         | 2261616 fruA;fruK;fruB                | fruB | 2260387 | 99  |
| TU-3589 | REV | 2263063 | 2263317 | 254 MU-2380          | yeiW                                  | yeiW | 2263063 |     |
| TU-3590 | REV | 2275071 | 2276446 | 1375 MU-2381         | 2276298 yejG                          | yejG | 2275915 | 39  |
| TU-3591 | REV | 2276621 | 2278546 | 1925 MU-2382         | 2278527 bcr;rsuA                      | rsuA | 2277810 | 22  |
| TU-3592 | REV | 2276621 | 2278546 | 1925 MU-2382         | 2278553 bcr;rsuA                      | rsuA | 2277810 | 48  |

|         |     |         |         |                      |                                                                              |      |         |      |
|---------|-----|---------|---------|----------------------|------------------------------------------------------------------------------|------|---------|------|
| TU-3593 | REV | 2276621 | 2278546 | 1925 MU-2382         | 2278566 bcr;rsuA                                                             | rsuA | 2277810 | 61   |
| TU-3594 | REV | 2280897 | 2282072 | 1175 MU-2383         | 2281991 yejK                                                                 | yejK | 2280962 | 22   |
| TU-3595 | REV | 2280897 | 2282072 | 1175 MU-2383         | 2282034 yejK                                                                 | yejK | 2280962 | 65   |
| TU-3596 | REV | 2284463 | 2286863 | 2400 MU-2384         | 2286797 yejO                                                                 | yejO | 2284412 | -139 |
| TU-3597 | REV | 2286938 | 2288113 | 1175 MU-2385         | 2288240 insH                                                                 | insH | 2287087 | 137  |
| TU-3598 | REV | 2288136 | 2288202 | 66 MU-2384-1         | yejO                                                                         | yejO | 2288136 |      |
| TU-3599 | REV | 2289663 | 2295938 | 6275 MU-2386         | 2295930 ccmH;ccmG;ccmF;ccmE;ccmD;ccmC;ccmB;c<br>cmA                          | ccmA | 2295043 | 264  |
| TU-3600 | REV | 2296163 | 2300938 | 4775 MU-2387         | napC;napB;napH;napG;napA;napD                                                | napA | 2298289 |      |
| TU-3601 | REV | 2302463 | 2304825 | 2362 MU-2388         | 2304826 mqo                                                                  | mqo  | 2303130 | 50   |
| TU-3602 | REV | 2305050 | 2306825 | 1775 MU-2389         | 2306662 yojI                                                                 | yojI | 2304994 | 25   |
| TU-3603 | REV | 2307000 | 2308575 | 1575 MU-2390         | 2308429 alkB;ada                                                             | ada  | 2307363 | 2    |
| TU-3604 | REV | 2308700 | 2311000 | 2300 MU-2391         | 2310826 apbE;ompC                                                            | ompC | 2309668 | 55   |
| TU-3605 | REV | 2308700 | 2311000 | 2300 MU-2391         | 2310858 apbE;ompC                                                            | ompC | 2309668 | 87   |
| TU-3606 | REV | 2314775 | 2318100 | 3325 MU-2392         | 2318151 rcsC                                                                 | rcsC | 2315049 | 253  |
| TU-3607 | REV | 2325389 | 2334666 | 9277 MU-2393         | yfaP;yfaQ;yfaS;yfaT;yfaA                                                     | yfaA | 2332978 |      |
| TU-3608 | REV | 2334825 | 2337450 | 2625 MU-2394         | 2337473 gyrA                                                                 | gyrA | 2334815 | 31   |
| TU-3609 | REV | 2334825 | 2337450 | 2625 MU-2394         | 2337479 gyrA                                                                 | gyrA | 2334815 | 37   |
| TU-3610 | REV | 2338575 | 2339925 | 1350 MU-2395         | 2340036 NT                                                                   |      |         |      |
| TU-3611 | REV | 2338439 | 2342191 | 3752 MU-2396         | yfaL                                                                         | yfaL | 2338439 |      |
| TU-3612 | REV | 2342616 | 2342759 | 143 MU-2397          | 2342788 ypaB                                                                 | ypaB | 2342616 | 29   |
| TU-3613 | REV | 2346875 | 2347500 | 625 MU-2398          | 2347522 inaA                                                                 | inaA | 2346844 | 28   |
| TU-3614 | REV | 2347900 | 2350078 | 2178 MU-2399         | 2350000 glpQ;glpT                                                            | glpT | 2349038 | -396 |
| TU-3615 | REV | 2356204 | 2360154 | 3950 MU-2400         | 2360256 yfaU;yfaV;yfaW;yfaX                                                  | yfaX | 2359451 | 23   |
| TU-3616 | REV | 2360479 | 2361679 | 1200 MU-2401         | 2361677 yfaY                                                                 | yfaY | 2360453 | 22   |
| TU-3617 | REV | 2361879 | 2362304 | 425 MU-2402          | 2362329 yfaZ                                                                 | yfaZ | 2361755 | 32   |
| TU-3618 | REV | 2361879 | 2362304 | 425 MU-2402          | 2362338 yfaZ                                                                 | yfaZ | 2361755 | 41   |
| TU-3619 | REV | 2363040 | 2363642 | 602 MU-2403          | ais                                                                          | ais  | 2363040 |      |
| TU-3620 | REV | 2370879 | 2371554 | 675 MU-2404          | 2371594 pmrD                                                                 | pmrD | 2371294 | 34   |
| TU-3621 | REV | 2371654 | 2375004 | 3350 MU-2405         | 2374936 menE;menC;menB                                                       | menB | 2373984 | 95   |
| TU-3622 | REV | 2371654 | 2378679 | 7025 MU-2405;MU-2406 | 2378723 menE;menC;menB;yfbB;menD;menF                                        | menF | 2377370 | 58   |
| TU-3623 | REV | 2378704 | 2379154 | 450 MU-2407          | 2379075 elaB                                                                 | elaB | 2378744 | 26   |
| TU-3624 | REV | 2379179 | 2379554 | 375 MU-2408          | 2379587 elaA                                                                 | elaA | 2379104 | 22   |
| TU-3625 | REV | 2382530 | 2383755 | 1225 MU-2409         | 2383776 yfbK                                                                 | yfbK | 2382017 | 32   |
| TU-3626 | REV | 2382530 | 2383755 | 1225 MU-2409         | 2383833 yfbK                                                                 | yfbK | 2382017 | 89   |
| TU-3627 | REV | 2385732 | 2386448 | 716 MU-2410          | yfbN                                                                         | yfbN | 2385732 |      |
| TU-3628 | REV | 2387905 | 2403505 | 15600 MU-2411        | 2403158 nuoN;nuoM;nuoL;nuoK;nuoJ;nuoI;nuoH;nuo<br>G;nuoF;nuoE;nuoC;nuoB;nuoA | nuoA | 2402651 | 64   |
| TU-3629 | REV | 2387905 | 2403505 | 15600 MU-2411        | 2403180 nuoN;nuoM;nuoL;nuoK;nuoJ;nuoI;nuoH;nuo<br>G;nuoF;nuoE;nuoC;nuoB;nuoA | nuoA | 2402651 | 86   |
| TU-3630 | REV | 2387905 | 2403505 | 15600 MU-2411        | 2403201 nuoN;nuoM;nuoL;nuoK;nuoJ;nuoI;nuoH;nuo<br>G;nuoF;nuoE;nuoC;nuoB;nuoA | nuoA | 2402651 | 107  |
| TU-3631 | REV | 2387905 | 2403505 | 15600 MU-2411        | 2403219 nuoN;nuoM;nuoL;nuoK;nuoJ;nuoI;nuoH;nuo<br>G;nuoF;nuoE;nuoC;nuoB;nuoA | nuoA | 2402651 | 125  |
| TU-3632 | REV | 2387905 | 2403505 | 15600 MU-2411        | 2403397 nuoN;nuoM;nuoL;nuoK;nuoJ;nuoI;nuoH;nuo<br>G;nuoF;nuoE;nuoC;nuoB;nuoA | nuoA | 2402651 | 303  |



|         |     |         |         |                              |         |                                    |      |         |     |
|---------|-----|---------|---------|------------------------------|---------|------------------------------------|------|---------|-----|
| TU-3633 | REV | 2403697 | 2405097 | 1400 MU-2412                 | 2404785 | lrhA                               | lrhA | 2403725 | 122 |
| TU-3634 | REV | 2403697 | 2405097 | 1400 MU-2412                 | 2405023 | lrhA                               | lrhA | 2403725 | 360 |
| TU-3635 | REV | 2403697 | 2405097 | 1400 MU-2412                 | 2405123 | lrhA                               | lrhA | 2403725 | 460 |
| TU-3636 | REV | 2407547 | 2409372 | 1825 MU-2413                 | 2409504 | yfbS                               | yfbS | 2407542 | 130 |
| TU-3637 | REV | 2409472 | 2410647 | 1175 MU-2414                 | 2410652 | yfbT;yfbU                          | yfbU | 2410122 | 36  |
| TU-3638 | REV | 2409472 | 2410647 | 1175 MU-2414                 | 2410658 | yfbT;yfbU                          | yfbU | 2410122 | 42  |
| TU-3639 | REV | 2409472 | 2410647 | 1175 MU-2414                 | 2410667 | yfbT;yfbU                          | yfbU | 2410122 | 51  |
| TU-3640 | REV | 2410697 | 2411772 | 1075 MU-2415                 | 2411591 | yfbV                               | yfbV | 2410699 | 437 |
| TU-3641 | REV | 2410697 | 2411772 | 1075 MU-2415                 | 2411704 | yfbV                               | yfbV | 2410699 | 550 |
| TU-3642 | REV | 2416672 | 2417847 | 1175 MU-2416                 | 2417830 | yfcD;yfcE                          | yfcE | 2417256 | 20  |
| TU-3643 | REV | 2417897 | 2418547 | 650 MU-2417                  | 2418525 | yfcF                               | yfcF | 2417863 | 18  |
| TU-3644 | REV | 2417897 | 2418547 | 650 MU-2417                  | 2418532 | yfcF                               | yfcF | 2417863 | 25  |
| TU-3645 | REV | 2420672 | 2421297 | 625 MU-2418                  |         | yfcI                               | yfcI | 2420671 |     |
| TU-3646 | REV | 2421497 | 2424897 | 3400 MU-2419                 | 2424837 | hisP;hisM;hisQ;hisJ                | hisJ | 2424028 | 27  |
| TU-3647 | REV | 2421497 | 2424897 | 3400 MU-2419                 | 2424844 | hisP;hisM;hisQ;hisJ                | hisJ | 2424028 | 34  |
| TU-3648 | REV | 2421497 | 2424897 | 3400 MU-2419                 | 2424859 | hisP;hisM;hisQ;hisJ                | hisJ | 2424028 | 49  |
| TU-3649 | REV | 2424922 | 2425922 | 1000 MU-2420                 | 2425901 | argT                               | argT | 2425031 | 88  |
| TU-3650 | REV | 2424922 | 2425922 | 1000 MU-2420                 | 2425959 | argT                               | argT | 2425031 | 146 |
| TU-3651 | REV | 2426172 | 2428672 | 2500 MU-2421                 | 2428847 | ubiX;purF;cvpA                     | cvpA | 2428297 | 62  |
| TU-3652 | REV | 2428697 | 2429672 | 975 MU-2422                  | 2429694 | dedD                               | dedD | 2429044 | -12 |
| TU-3653 | REV | 2428697 | 2429672 | 975 MU-2422                  | 2429833 | dedD                               | dedD | 2429044 | 127 |
| TU-3654 | REV | 2429697 | 2432122 | 2425 MU-2423                 | 2431995 | folC;accD                          | accD | 2431034 | 47  |
| TU-3655 | REV | 2429697 | 2432122 | 2425 MU-2423                 | 2432036 | folC;accD                          | accD | 2431034 | 88  |
| TU-3656 | REV | 2432147 | 2433397 | 1250 MU-2424                 | 2433217 | dedA                               | dedA | 2432104 | 454 |
| TU-3657 | REV | 2432147 | 2435247 | 3100 MU-2424;MU-2425         | 2435363 | dedA;truA;usg                      | usg  | 2433658 | 692 |
| TU-3658 | REV | 2432147 | 2435872 | 3725 MU-2424;MU-2425;MU-2426 | 2435905 | dedA;truA;usg;pdxB                 | pdxB | 2434737 | 32  |
| TU-3659 | REV | 2436964 | 2438142 | 1178 MU-2427                 |         | yfcJ                               | yfcJ | 2436964 |     |
| TU-3660 | REV | 2438347 | 2439722 | 1375 MU-2428                 | 2439663 | fabB                               | fabB | 2438407 | 36  |
| TU-3661 | REV | 2441747 | 2442447 | 700 MU-2429                  | 2442251 | yfcL                               | yfcL | 2441913 | 60  |
| TU-3662 | REV | 2441747 | 2442447 | 700 MU-2429                  | 2442286 | yfcL                               | yfcL | 2441913 | 95  |
| TU-3663 | REV | 2441747 | 2446473 | 4726 MU-2429;MU-2430         | 2446495 | yfcL;yfcM;yfcA;mepA;aroC;prmB      | prmB | 2445530 | 33  |
| TU-3664 | REV | 2447073 | 2448048 | 975 MU-2431                  | 2447951 | NT                                 |      |         |     |
| TU-3665 | REV | 2452323 | 2452698 | 375 MU-2432                  | 2452762 | NT                                 |      |         |     |
| TU-3666 | REV | 2447250 | 2453668 | 6418 MU-2433                 |         | yfcO;yfcP;yfcQ;yfcR;yfcS;yfcU;yfcV | yfcV | 2453105 |     |
| TU-3667 | REV | 2454348 | 2454848 | 500 MU-2434                  | 2454827 | sixA                               | sixA | 2454349 | -7  |
| TU-3668 | REV | 2454348 | 2454848 | 500 MU-2434                  | 2454938 | sixA                               | sixA | 2454349 | 104 |
| TU-3669 | REV | 2454898 | 2458500 | 3602 MU-2435                 | 2458531 | fadJ;fadI                          | fadI | 2457181 | 40  |
| TU-3670 | REV | 2458675 | 2459250 | 575 MU-2436                  | 2459001 | yfcZ                               | yfcZ | 2458672 | 45  |
| TU-3671 | REV | 2462328 | 2463203 | 875 MU-2437                  | 2463106 | vacJ                               | vacJ | 2462274 | 77  |
| TU-3672 | REV | 2462328 | 2463203 | 875 MU-2437                  | 2463157 | vacJ                               | vacJ | 2462274 | 128 |
| TU-3673 | REV | 2468553 | 2468678 | 125 MU-2438                  | 2468671 | NT                                 |      |         |     |
| TU-3674 | REV | 2468553 | 2468678 | 125 MU-2438                  | 2468686 | NT                                 |      |         |     |
| TU-3675 | REV | 2469099 | 2471346 | 2247 MU-2439                 |         | yfdK;yfdL;yfdM;yfdN;yfdO           | yfdO | 2470900 |     |
| TU-3676 | REV | 2474803 | 2475628 | 825 MU-2440                  | 2475745 | dsdC                               | dsdC | 2474716 | 94  |
| TU-3677 | REV | 2478660 | 2481361 | 2701 MU-2441                 |         | emrY;emrK                          | emrK | 2480198 |     |
| TU-3678 | REV | 2485679 | 2486379 | 700 MU-2442                  | 2486315 | NT                                 |      |         |     |

|         |     |         |         |                      |                                  |        |         |     |
|---------|-----|---------|---------|----------------------|----------------------------------|--------|---------|-----|
| TU-3679 | REV | 2486045 | 2488208 | 2163 MU-2443         | yfdE;yfdV                        | yfdV   | 2487264 |     |
| TU-3680 | REV | 2488278 | 2491276 | 2998 MU-2444         | oxc;frc                          | frc    | 2490026 |     |
| TU-3681 | REV | 2491789 | 2492424 | 635 MU-2445          | yfdX                             | yfdX   | 2491789 |     |
| TU-3682 | REV | 2492854 | 2493329 | 475 MU-2446          | 2493341 yfdY                     | yfdY   | 2493072 | 27  |
| TU-3683 | REV | 2494216 | 2494651 | 435 MU-2447          | tpke70                           | tpke70 | 2494216 |     |
| TU-3684 | REV | 2495129 | 2496354 | 1225 MU-2448         | 2496467 yfdZ                     | yfdZ   | 2495079 | 150 |
| TU-3685 | REV | 2500012 | 2506264 | 6252 MU-2449         | fryA;ypdE;ypdF;fryC;fryB         | fryB   | 2505938 |     |
| TU-3686 | REV | 2506554 | 2508054 | 1500 MU-2450         | 2507954 glk                      | glk    | 2506483 | 506 |
| TU-3687 | REV | 2509479 | 2510854 | 1375 MU-2451         | 2510851 mntH                     | mntH   | 2509490 | 123 |
| TU-3688 | REV | 2509479 | 2510854 | 1375 MU-2451         | 2510875 mntH                     | mntH   | 2509490 | 147 |
| TU-3689 | REV | 2513104 | 2516004 | 2900 MU-2452         | 2515900 yfeA                     | yfeA   | 2513665 | 46  |
| TU-3690 | REV | 2516054 | 2516254 | 200 MU-2453          | 2516263 alaX;alaW                | alaW   | 2516178 | 10  |
| TU-3691 | REV | 2517329 | 2518779 | 1450 MU-2454         | 2518736 gltX                     | gltX   | 2517279 | 42  |
| TU-3692 | REV | 2517329 | 2518779 | 1450 MU-2454         | 2518746 gltX                     | gltX   | 2517279 | 52  |
| TU-3693 | REV | 2517329 | 2518779 | 1450 MU-2454         | 2518796 gltX                     | gltX   | 2517279 | 102 |
| TU-3694 | REV | 2519754 | 2520429 | 675 MU-2455          | 2520518 xapR                     | xapR   | 2519615 | 19  |
| TU-3695 | REV | 2519754 | 2520429 | 675 MU-2455          | 2520527 xapR                     | xapR   | 2519615 | 28  |
| TU-3696 | REV | 2520751 | 2522900 | 2149 MU-2456         | xapB;xapA                        | xapA   | 2522067 |     |
| TU-3697 | REV | 2524481 | 2524806 | 325 MU-2457          | yfeR                             | yfeR   | 2523952 |     |
| TU-3698 | REV | 2526156 | 2528231 | 2075 MU-2458         | 2528246 ypeB;ligA                | ligA   | 2526183 | 48  |
| TU-3699 | REV | 2528256 | 2529281 | 1025 MU-2459         | 2529301 zipA                     | zipA   | 2528269 | 46  |
| TU-3700 | REV | 2534456 | 2535306 | 850 MU-2460          | 2535298 pdxK                     | pdxK   | 2534408 | 39  |
| TU-3701 | REV | 2534456 | 2535306 | 850 MU-2460          | 2535305 pdxK                     | pdxK   | 2534408 | 46  |
| TU-3702 | REV | 2536106 | 2541558 | 5452 MU-2461         | 2541580 cysM;cysA;cysW;cysU;cysP | cysP   | 2540534 | 30  |
| TU-3703 | REV | 2541710 | 2542660 | 950 MU-2462          | 2542686 ucpA                     | ucpA   | 2541854 | 41  |
| TU-3704 | REV | 2542960 | 2543635 | 675 MU-2463          | yfeT                             | yfeT   | 2542774 |     |
| TU-3705 | REV | 2547485 | 2548785 | 1300 MU-2464         | 2548612 yfeX                     | yfeX   | 2547668 | 45  |
| TU-3706 | REV | 2547485 | 2548785 | 1300 MU-2464         | 2548680 yfeX                     | yfeX   | 2547668 | 113 |
| TU-3707 | REV | 2547485 | 2550160 | 2675 MU-2464;MU-2465 | 2550165 yfeX;yfeY;yfeZ;ypeA      | ypeA   | 2549735 | 5   |
| TU-3708 | REV | 2547485 | 2550160 | 2675 MU-2464;MU-2465 | 2550190 yfeX;yfeY;yfeZ;ypeA      | ypeA   | 2549735 | 30  |
| TU-3709 | REV | 2547485 | 2550160 | 2675 MU-2464;MU-2465 | 2550324 yfeX;yfeY;yfeZ;ypeA      | ypeA   | 2549735 | 164 |
| TU-3710 | REV | 2552260 | 2556910 | 4650 MU-2466         | 2556832 eutR;eutK;eutL;eutC;eutB | eutB   | 2555340 | 131 |
| TU-3711 | REV | 2552260 | 2556910 | 4650 MU-2466         | 2556852 eutR;eutK;eutL;eutC;eutB | eutB   | 2555340 | 151 |
| TU-3712 | REV | 2558985 | 2559061 | 76 MU-2467           | 2559079 NT                       |        |         |     |
| TU-3713 | REV | 2563503 | 2566129 | 2626 MU-2468         | eutA;eutH                        | eutH   | 2564903 |     |
| TU-3714 | REV | 2566346 | 2570072 | 3726 MU-2469         | eutG;eutJ;eutE;eutN              | eutN   | 2569785 |     |
| TU-3715 | REV | 2570179 | 2573827 | 3648 MU-2470         | eutM;eutD;eutT;eutQ;eutP;eutS    | eutS   | 2573492 |     |
| TU-3716 | REV | 2574112 | 2576512 | 2400 MU-2471         | 2576431 maeB                     | maeB   | 2574120 | 32  |
| TU-3717 | REV | 2574112 | 2576512 | 2400 MU-2471         | 2576547 maeB                     | maeB   | 2574120 | 148 |
| TU-3718 | REV | 2574112 | 2576512 | 2400 MU-2471         | 2576553 maeB                     | maeB   | 2574120 | 154 |
| TU-3719 | REV | 2579912 | 2580812 | 900 MU-2472          | 2580921 ypfG                     | ypfG   | 2579756 | 122 |
| TU-3720 | REV | 2579912 | 2580812 | 900 MU-2472          | 2580929 ypfG                     | ypfG   | 2579756 | 130 |
| TU-3721 | REV | 2580987 | 2581487 | 500 MU-2473          | 2581523 nudK                     | nudK   | 2580925 | 23  |
| TU-3722 | REV | 2581568 | 2583547 | 1979 MU-2474         | aegA                             | aegA   | 2581568 |     |
| TU-3723 | REV | 2588763 | 2589063 | 300 MU-2475          | 2588907 ypfM                     | ypfM   | 2588829 | 19  |
| TU-3724 | REV | 2591113 | 2591863 | 750 MU-2476          | 2591811 ypfH                     | ypfH   | 2591094 | 19  |

|         |     |         |         |                      |                             |       |         |      |
|---------|-----|---------|---------|----------------------|-----------------------------|-------|---------|------|
| TU-3725 | REV | 2591113 | 2594863 | 3750 MU-2476;MU-2477 | 2594785 ypfH;ypfI;ypfJ      | ypfJ  | 2593896 | 26   |
| TU-3726 | REV | 2591113 | 2594863 | 3750 MU-2476;MU-2477 | 2594806 ypfH;ypfI;ypfJ      | ypfJ  | 2593896 | 47   |
| TU-3727 | REV | 2594913 | 2595788 | 875 MU-2478          | 2595666 purC                | purC  | 2594927 | 26   |
| TU-3728 | REV | 2594913 | 2595788 | 875 MU-2478          | 2595676 purC                | purC  | 2594927 | 36   |
| TU-3729 | REV | 2594913 | 2595788 | 875 MU-2478          | 2595755 purC                | purC  | 2594927 | 115  |
| TU-3730 | REV | 2595813 | 2597813 | 2000 MU-2479         | 2597806 bamC;dapA           | dapA  | 2596904 | 24   |
| TU-3731 | REV | 2612440 | 2613915 | 1475 MU-2480         | 2613938 yfgO                | yfgO  | 2612842 | 35   |
| TU-3732 | REV | 2616065 | 2616840 | 775 MU-2481          | 2616827 hda                 | hda   | 2616097 | -16  |
| TU-3733 | REV | 2616065 | 2618215 | 2150 MU-2481;MU-2482 | 2618258 hda;uraA            | uraA  | 2616893 | 76   |
| TU-3734 | REV | 2616065 | 2618215 | 2150 MU-2481;MU-2482 | 2618264 hda;uraA            | uraA  | 2616893 | 82   |
| TU-3735 | REV | 2618266 | 2618916 | 650 MU-2483          | 2618924 upp                 | upp   | 2618268 | 30   |
| TU-3736 | REV | 2618266 | 2618916 | 650 MU-2483          | 2618931 upp                 | upp   | 2618268 | 37   |
| TU-3737 | REV | 2624717 | 2626960 | 2243 MU-2484         | yfgF                        | yfgF  | 2624717 |      |
| TU-3738 | REV | 2628978 | 2630778 | 1800 MU-2485         | 2630583 guaA                | guaA  | 2628980 | 26   |
| TU-3739 | REV | 2628978 | 2630778 | 1800 MU-2485         | 2630625 guaA                | guaA  | 2628980 | 68   |
| TU-3740 | REV | 2628978 | 2630778 | 1800 MU-2485         | 2630663 guaA                | guaA  | 2628980 | 106  |
| TU-3741 | REV | 2628978 | 2632103 | 3125 MU-2485;MU-2486 | 2632099 guaA;guaB           | guaB  | 2630626 | 7    |
| TU-3742 | REV | 2628978 | 2632103 | 3125 MU-2485;MU-2486 | 2632112 guaA;guaB           | guaB  | 2630626 | 20   |
| TU-3743 | REV | 2628978 | 2632103 | 3125 MU-2485;MU-2486 | 2632120 guaA;guaB           | guaB  | 2630626 | 28   |
| TU-3744 | REV | 2628978 | 2632103 | 3125 MU-2485;MU-2486 | 2632127 guaA;guaB           | guaB  | 2630626 | 35   |
| TU-3745 | REV | 2633728 | 2633828 | 100 MU-2487          | 2633893 yfgJ                | yfgJ  | 2633621 | 57   |
| TU-3746 | REV | 2633878 | 2635878 | 2000 MU-2488         | 2635401 der                 | der   | 2633906 | 23   |
| TU-3747 | REV | 2633878 | 2635878 | 2000 MU-2488         | 2635441 der                 | der   | 2633906 | 63   |
| TU-3748 | REV | 2633878 | 2635878 | 2000 MU-2488         | 2635482 der                 | der   | 2633906 | 104  |
| TU-3749 | REV | 2633878 | 2635878 | 2000 MU-2488         | 2635811 der                 | der   | 2633906 | 433  |
| TU-3750 | REV | 2635903 | 2638754 | 2851 MU-2489         | 2638708 bamB;yfgM;hisS;sroE | sroE  | 2638617 | 0    |
| TU-3751 | REV | 2638779 | 2640879 | 2100 MU-2490         | 2640937 ispG;yfgA           | yfgA  | 2639853 | 71   |
| TU-3752 | REV | 2638779 | 2640879 | 2100 MU-2490         | 2640954 ispG;yfgA           | yfgA  | 2639853 | 88   |
| TU-3753 | REV | 2638779 | 2640879 | 2100 MU-2490         | 2641026 ispG;yfgA           | yfgA  | 2639853 | 160  |
| TU-3754 | REV | 2640904 | 2642504 | 1600 MU-2491         | 2642409 rlmN                | rlmN  | 2641151 | 104  |
| TU-3755 | REV | 2642529 | 2642954 | 425 MU-2492          | 2642905 ndk                 | ndk   | 2642455 | 19   |
| TU-3756 | REV | 2642529 | 2642954 | 425 MU-2492          | 2642935 trnk                | ndk   | 2642455 | 49   |
| TU-3757 | REV | 2643079 | 2648855 | 5776 MU-2493         | 2648867 pbpC                | pbpC  | 2643035 | 3520 |
| TU-3758 | REV | 2643079 | 2650330 | 7251 MU-2493;MU-2494 | 2650349 pbpC;yfhM           | yfhM  | 2645348 | 40   |
| TU-3759 | REV | 2643079 | 2650330 | 7251 MU-2493;MU-2494 | 2650424 pbpC;yfhM           | yfhM  | 2645348 | 115  |
| TU-3760 | REV | 2651410 | 2651460 | 50 MU-2495           | 2651695 C0614               | C0614 | 2651474 | 135  |
| TU-3761 | REV | 2652199 | 2654474 | 2275 MU-2496         | 2654561 sseB;pepB           | pepB  | 2653097 | 181  |
| TU-3762 | REV | 2652199 | 2654474 | 2275 MU-2496         | 2654589 sseB;pepB           | pepB  | 2653097 | 209  |
| TU-3763 | REV | 2654499 | 2657174 | 2675 MU-2497         | 2657012 iscX;fdx;hscA       | hscA  | 2655107 | 55   |
| TU-3764 | REV | 2657199 | 2658052 | 853 MU-2498          | 2657928 hscB;iscA           | iscA  | 2657585 | 20   |
| TU-3765 | REV | 2657199 | 2658052 | 853 MU-2498          | 2658178 hscB;iscA           | iscA  | 2657585 | 270  |
| TU-3766 | REV | 2658077 | 2660227 | 2150 MU-2499         | 2660290 iscU;iscS;iscR      | iscR  | 2659665 | 137  |
| TU-3767 | REV | 2660277 | 2661352 | 1075 MU-2500         | 2661369 trmJ                | trmJ  | 2660605 | 24   |
| TU-3768 | REV | 2665027 | 2666927 | 1900 MU-2501         | 2666961 hcaT;hcaR           | hcaR  | 2666028 | 43   |
| TU-3769 | REV | 2665027 | 2666927 | 1900 MU-2501         | 2666967 hcaT;hcaR           | hcaR  | 2666028 | 49   |
| TU-3770 | REV | 2671927 | 2675502 | 3575 MU-2502         | 2675475 yphB;yphC;yphD      | yphD  | 2673849 | 628  |

|         |     |         |         |                              |                                       |      |         |      |
|---------|-----|---------|---------|------------------------------|---------------------------------------|------|---------|------|
| TU-3771 | REV | 2671927 | 2675502 | 3575 MU-2502                 | 2675603 yphB;yphC;yphD                | yphD | 2673849 | 756  |
| TU-3772 | REV | 2671927 | 2677302 | 5375 MU-2502;MU-2503         | 2677426 yphB;yphC;yphD;yphE;yphF      | yphF | 2676406 | 37   |
| TU-3773 | REV | 2671927 | 2680527 | 8600 MU-2502;MU-2503;MU-2504 | 2680419 yphB;yphC;yphD;yphE;yphF;yphG | yphG | 2677486 | -348 |
| TU-3774 | REV | 2682152 | 2683577 | 1425 MU-2505                 | 2683559 glyA                          | glyA | 2682276 | 30   |
| TU-3775 | REV | 2682152 | 2683577 | 1425 MU-2505                 | 2683594 glyA                          | glyA | 2682276 | 65   |
| TU-3776 | REV | 2685102 | 2685277 | 175 MU-2506                  | 2685463 glnB                          | glnB | 2685092 | 33   |
| TU-3777 | REV | 2685102 | 2685277 | 175 MU-2506                  | 2685545 glnB                          | glnB | 2685092 | 115  |
| TU-3778 | REV | 2685302 | 2688227 | 2925 MU-2507                 | 2688207 yfhA;yfhG                     | yfhG | 2686815 | 679  |
| TU-3779 | REV | 2685302 | 2688227 | 2925 MU-2507                 | 2688341 yfhA;yfhG                     | yfhG | 2686815 | 813  |
| TU-3780 | REV | 2688302 | 2689352 | 1050 MU-2508                 | 2689362 yfhK;glmY                     | glmY | 2689179 | 0    |
| TU-3781 | REV | 2689627 | 2693577 | 3950 MU-2509                 | 2693611 purL                          | purL | 2689678 | 46   |
| TU-3782 | REV | 2695302 | 2696577 | 1275 MU-2510                 | 2696606 tadA;yfhB                     | yfhB | 2695937 | 34   |
| TU-3783 | REV | 2695302 | 2696577 | 1275 MU-2510                 | 2696614 tadA;yfhB                     | yfhB | 2695937 | 42   |
| TU-3784 | REV | 2698202 | 2698377 | 175 MU-2511                  | 2698358 ryfB                          | ryfB | 2698081 | -41  |
| TU-3785 | REV | 2698714 | 2702264 | 3550 MU-2512                 | 2702104 acpS;pdxJ;recO;era;rnc        | rnc  | 2701405 | 19   |
| TU-3786 | REV | 2698714 | 2702264 | 3550 MU-2512                 | 2702115 acpS;pdxJ;recO;era;rnc        | rnc  | 2701405 | 30   |
| TU-3787 | REV | 2698714 | 2702264 | 3550 MU-2512                 | 2702123 acpS;pdxJ;recO;era;rnc        | rnc  | 2701405 | 38   |
| TU-3788 | REV | 2698714 | 2702264 | 3550 MU-2512                 | 2702205 acpS;pdxJ;recO;era;rnc        | rnc  | 2701405 | 120  |
| TU-3789 | REV | 2702364 | 2705289 | 2925 MU-2513                 | 2705232 lepB;lepA                     | lepA | 2703347 | 86   |
| TU-3790 | REV | 2705364 | 2707439 | 2075 MU-2514                 | 2707434 rseC;rseB;rseA                | rseA | 2706776 | 8    |
| TU-3791 | REV | 2705364 | 2707439 | 2075 MU-2514                 | 2707441 rseC;rseB;rseA                | rseA | 2706776 | 15   |
| TU-3792 | REV | 2705364 | 2707439 | 2075 MU-2514                 | 2707472 rseC;rseB;rseA                | rseA | 2706776 | 46   |
| TU-3793 | REV | 2705364 | 2707439 | 2075 MU-2514                 | 2707589 rseC;rseB;rseA                | rseA | 2706776 | 163  |
| TU-3794 | REV | 2705364 | 2707439 | 2075 MU-2514                 | 2707654 rseC;rseB;rseA                | rseA | 2706776 | 228  |
| TU-3795 | REV | 2707464 | 2708339 | 875 MU-2515                  | 2708110 rpoE                          | rpoE | 2707459 | 76   |
| TU-3796 | REV | 2707464 | 2708339 | 875 MU-2515                  | 2708252 rpoE                          | rpoE | 2707459 | 218  |
| TU-3797 | REV | 2709964 | 2710789 | 825 MU-2516                  | 2710822 yfiC                          | yfiC | 2710049 | 36   |
| TU-3798 | REV | 2712464 | 2713339 | 875 MU-2517                  | 2713408 yfiE                          | yfiE | 2712461 | 66   |
| TU-3799 | REV | 2713914 | 2714514 | 600 MU-2518                  | 2714490 yfiD                          | yfiD | 2714088 | 19   |
| TU-3800 | REV | 2713914 | 2714514 | 600 MU-2518                  | 2714508 yfiD                          | yfiD | 2714088 | 37   |
| TU-3801 | REV | 2713914 | 2714514 | 600 MU-2518                  | 2714523 yfiD                          | yfiD | 2714088 | 52   |
| TU-3802 | REV | 2713914 | 2714514 | 600 MU-2518                  | 2714531 yfiD                          | yfiD | 2714088 | 60   |
| TU-3803 | REV | 2713914 | 2714514 | 600 MU-2518                  | 2714543 yfiD                          | yfiD | 2714088 | 72   |
| TU-3804 | REV | 2715589 | 2716639 | 1050 MU-2519                 | 2716576 yfiF                          | yfiF | 2715513 | 26   |
| TU-3805 | REV | 2715589 | 2716639 | 1050 MU-2519                 | 2716615 yfiF                          | yfiF | 2715513 | 65   |
| TU-3806 | REV | 2715589 | 2716639 | 1050 MU-2519                 | 2716630 yfiF                          | yfiF | 2715513 | 80   |
| TU-3807 | REV | 2722140 | 2723815 | 1675 MU-2520                 | 2723834 kgtP                          | kgtP | 2722470 | 66   |
| TU-3808 | REV | 2724090 | 2724215 | 125 MU-2521                  | 2724210 rrfG                          | rrfG | 2724091 | 0    |
| TU-3809 | REV | 2724240 | 2729344 | 5104 MU-2522                 | 2729179 rrfG;rrlG;gltW;rrsG           | rrsG | 2727638 | 0    |
| TU-3810 | REV | 2729369 | 2732194 | 2825 MU-2523                 | 2732227 clpB                          | clpB | 2729622 | 32   |
| TU-3811 | REV | 2732219 | 2732294 | 75 MU-2524                   | 2732315 ryfD                          | ryfD | 2732175 | -2   |
| TU-3812 | REV | 2732319 | 2734119 | 1800 MU-2525                 | 2734086 yfiH;rluD                     | rluD | 2733053 | 53   |
| TU-3813 | REV | 2736069 | 2736544 | 475 MU-2526                  | 2736563 NT                            |      |         |      |
| TU-3814 | REV | 2736994 | 2739469 | 2475 MU-2527                 | 2739331 tyrA;aroF                     | aroF | 2738102 | 159  |
| TU-3815 | REV | 2742119 | 2744220 | 2101 MU-2528                 | 2744276 rplS;trmD;rimM;rpsP           | rpsP | 2743959 | 69   |
| TU-3816 | REV | 2742119 | 2744220 | 2101 MU-2528                 | 2744314 rplS;trmD;rimM;rpsP           | rpsP | 2743959 | 107  |

|         |     |         |         |              |                   |      |         |     |
|---------|-----|---------|---------|--------------|-------------------|------|---------|-----|
| TU-3817 | REV | 2744245 | 2745870 | 1625 MU-2529 | 2745876 ffh       | ffh  | 2744456 | 59  |
| TU-3818 | REV | 2747645 | 2748820 | 1175 MU-2530 | 2748759 grpE      | grpE | 2748137 | 29  |
| TU-3819 | REV | 2747645 | 2748820 | 1175 MU-2530 | 2748769 grpE      | grpE | 2748137 | 39  |
| TU-3820 | REV | 2752045 | 2752745 | 700 MU-2531  | 2752770 yfjF;yfjG | yfjG | 2752310 | -16 |
| TU-3821 | REV | 2755666 | 2756622 | 956 MU-2532  | yfjH              | yfjH | 2755666 |     |
| TU-3822 | REV | 2759336 | 2763486 | 4150 MU-2533 | 2763334 yfjK;yfjL | yfjL | 2761559 | 159 |
| TU-3823 | REV | 2763535 | 2763798 | 263 MU-2534  | yfjM              | yfjM | 2763535 |     |
| TU-3824 | REV | 2764086 | 2764211 | 125 MU-2535  | 2764225 NT        |      |         |     |
| TU-3825 | REV | 2769492 | 2770017 | 525 MU-2536  | 2769887 NT        |      |         |     |
| TU-3826 | REV | 2770092 | 2770967 | 875 MU-2537  | yfjU;yfjV         | yfjV | 2770189 |     |
| TU-3827 | REV | 2776268 | 2779593 | 3325 MU-2538 | 2779623 NT        |      |         |     |
| TU-3828 | REV | 2776168 | 2780748 | 4580 MU-2539 | ypjA              | ypjA | 2776168 |     |
| TU-3829 | REV | 2781087 | 2781326 | 239 MU-2540  | pinH              | pinH | 2781087 |     |
| TU-3830 | REV | 2781660 | 2783033 | 1373 MU-2541 | ypjC              | ypjC | 2781660 |     |
| TU-3831 | REV | 2783799 | 2783824 | 25 MU-2542   | 2783978 ileY      | ileY | 2783784 | 119 |
| TU-3832 | REV | 2794102 | 2794277 | 175 MU-2543  | 2794373 NT        |      |         |     |
| TU-3833 | REV | 2794302 | 2794827 | 525 MU-2544  | 2794835 ygaU      | ygaU | 2794359 | 27  |
| TU-3834 | REV | 2794877 | 2795077 | 200 MU-2545  | 2795088 yqaE      | yqaE | 2794892 | 38  |
| TU-3835 | REV | 2794877 | 2795077 | 200 MU-2545  | 2795098 yqaE      | yqaE | 2794892 | 48  |
| TU-3836 | REV | 2794877 | 2795077 | 200 MU-2545  | 2795107 yqaE      | yqaE | 2794892 | 57  |
| TU-3837 | REV | 2796002 | 2796552 | 550 MU-2546  | 2796550 stpA      | stpA | 2796113 | 33  |
| TU-3838 | REV | 2796002 | 2796552 | 550 MU-2546  | 2796559 stpA      | stpA | 2796113 | 42  |
| TU-3839 | REV | 2796002 | 2796552 | 550 MU-2546  | 2796579 stpA      | stpA | 2796113 | 62  |
| TU-3840 | REV | 2796002 | 2796552 | 550 MU-2546  | 2796599 stpA      | stpA | 2796113 | 82  |
| TU-3841 | REV | 2797477 | 2798177 | 700 MU-2547  | 2798154 ygaC      | ygaC | 2797672 | 138 |
| TU-3842 | REV | 2798302 | 2798702 | 400 MU-2548  | 2798693 NT        |      |         |     |
| TU-3843 | REV | 2807153 | 2807578 | 425 MU-2549  | 2807603 NT        |      |         |     |
| TU-3844 | REV | 2809453 | 2809503 | 50 MU-2550   | NT                |      |         |     |
| TU-3845 | REV | 2812003 | 2812906 | 903 MU-2551  | 2812784 luxS      | luxS | 2812240 | 29  |
| TU-3846 | REV | 2812003 | 2812906 | 903 MU-2551  | 2812837 luxS      | luxS | 2812240 | 82  |
| TU-3847 | REV | 2812003 | 2812906 | 903 MU-2551  | 2812900 luxS      | luxS | 2812240 | 145 |
| TU-3848 | REV | 2812931 | 2814756 | 1825 MU-2552 | 2814612 gshA      | gshA | 2812905 | 151 |
| TU-3849 | REV | 2814806 | 2815531 | 725 MU-2553  | 2815550 yqaA;yqaB | yqaB | 2814959 | 25  |
| TU-3850 | REV | 2815731 | 2815856 | 125 MU-2554  | 2815942 argQ      | argQ | 2815806 | 60  |
| TU-3851 | REV | 2816081 | 2816131 | 50 MU-2555   | argZ              | argZ | 2816081 |     |
| TU-3852 | REV | 2816231 | 2816281 | 50 MU-2556   | 2816357 argY      | argY | 2816220 | 61  |
| TU-3853 | REV | 2816506 | 2816706 | 200 MU-2557  | 2816667 argV;serV | serV | 2816575 | 0   |
| TU-3854 | REV | 2816931 | 2817156 | 225 MU-2558  | 2817211 csrA      | csrA | 2816983 | 43  |
| TU-3855 | REV | 2816931 | 2817156 | 225 MU-2558  | 2817220 csrA      | csrA | 2816983 | 52  |
| TU-3856 | REV | 2816931 | 2817156 | 225 MU-2558  | 2817295 csrA      | csrA | 2816983 | 127 |
| TU-3857 | REV | 2817181 | 2820081 | 2900 MU-2559 | 2820046 alaS      | alaS | 2817403 | 13  |
| TU-3858 | REV | 2817181 | 2820081 | 2900 MU-2559 | 2820060 alaS      | alaS | 2817403 | 27  |
| TU-3859 | REV | 2817181 | 2820081 | 2900 MU-2559 | 2820112 alaS      | alaS | 2817403 | 79  |
| TU-3860 | REV | 2820161 | 2820661 | 500 MU-2560  | recX              | recX | 2820161 |     |
| TU-3861 | REV | 2820781 | 2821831 | 1050 MU-2561 | 2821830 recA      | recA | 2820730 | 39  |
| TU-3862 | REV | 2820781 | 2821831 | 1050 MU-2561 | 2821834 recA      | recA | 2820730 | 43  |

|         |     |         |         |                                      |                                                  |      |         |      |
|---------|-----|---------|---------|--------------------------------------|--------------------------------------------------|------|---------|------|
| TU-3863 | REV | 2820781 | 2821831 | 1050 MU-2561                         | 2821840 recA                                     | recA | 2820730 | 49   |
| TU-3864 | REV | 2820781 | 2821831 | 1050 MU-2561                         | 2821878 recA                                     | recA | 2820730 | 87   |
| TU-3865 | REV | 2821881 | 2822381 | 500 MU-2562                          | 2822395 ygaD                                     | ygaD | 2821871 | 27   |
| TU-3866 | REV | 2822531 | 2823606 | 1075 MU-2563                         | 2823564 mltB                                     | mltB | 2822513 | -34  |
| TU-3867 | REV | 2828856 | 2830306 | 1450 MU-2564                         | 2830332 norR                                     | norR | 2828797 | 21   |
| TU-3868 | REV | 2833581 | 2835506 | 1925 MU-2565                         | 2835567 hypF                                     | hypF | 2833195 | 120  |
| TU-3869 | REV | 2835600 | 2836127 | 527 MU-2566                          | hydN                                             | hydN | 2835600 |      |
| TU-3870 | REV | 2836281 | 2837281 | 1000 MU-2567                         | 2837310 ascG                                     | ascG | 2836276 | 21   |
| TU-3871 | REV | 2840606 | 2841081 | 475 MU-2568                          | 2841124 hycI                                     | hycI | 2840595 | 59   |
| TU-3872 | REV | 2840595 | 2848457 | 7862 MU-2569                         | hycI;hycH;hycG;hycF;hycE;hycD;hycC;hycB;<br>hycA | hycA | 2847996 |      |
| TU-3873 | REV | 2854506 | 2854831 | 325 MU-2570                          | 2854922 ygbA                                     | ygbA | 2854475 | 94   |
| TU-3874 | REV | 2858532 | 2859257 | 725 MU-2571                          | 2859278 ygbI                                     | ygbI | 2858489 | -8   |
| TU-3875 | REV | 2864582 | 2866082 | 1500 MU-2572                         | 2866141 rpoS                                     | rpoS | 2864581 | 568  |
| TU-3876 | REV | 2864582 | 2866857 | 2275 MU-2572;MU-2573                 | 2866803 rpoS;nlpD                                | nlpD | 2865636 | 28   |
| TU-3877 | REV | 2866882 | 2868482 | 1600 MU-2574                         | 2868608 pcm;surE                                 | surE | 2867535 | 312  |
| TU-3878 | REV | 2866882 | 2868482 | 1600 MU-2574                         | 2868673 pcm;surE                                 | surE | 2867535 | 377  |
| TU-3879 | REV | 2868507 | 2871007 | 2500 MU-2575                         | 2870979 truD;ispF;ispD;ftsB                      | ftsB | 2870531 | 137  |
| TU-3880 | REV | 2871032 | 2871407 | 375 MU-2576                          | ygbE                                             | ygbE | 2871036 |      |
| TU-3881 | REV | 2871432 | 2874382 | 2950 MU-2577                         | 2874392 cysC;cysN;cysD                           | cysD | 2873443 | 41   |
| TU-3882 | REV | 2876257 | 2876532 | 275 MU-2578                          | 2876455 NT                                       |      |         |      |
| TU-3883 | REV | 2876607 | 2876782 | 175 MU-2579                          | ygbF                                             | ygbF | 2876591 |      |
| TU-3884 | REV | 2876607 | 2878332 | 1725 MU-2579;MU-2580                 | 2878363 ygbF;ygbT;ygcH                           | ygcH | 2877810 | -46  |
| TU-3885 | REV | 2876607 | 2878332 | 1725 MU-2579;MU-2580                 | 2878413 ygbF;ygbT;ygcH                           | ygcH | 2877810 | 4    |
| TU-3886 | REV | 2876607 | 2879082 | 2475 MU-2579;MU-2580;MU-2581         | 2878903 ygbF;ygbT;ygcH;ygcI                      | ygcI | 2878396 | -167 |
| TU-3887 | REV | 2876607 | 2882160 | 5553 MU-2579;MU-2580;MU-2581;MU-2582 | ygbF;ygbT;ygcH;ygcI;ygcJ;ygcK;ygcL               | ygcL | 2880652 |      |
| TU-3888 | REV | 2882675 | 2884250 | 1575 MU-2583                         | 2884174 NT                                       |      |         |      |
| TU-3889 | REV | 2884425 | 2885125 | 700 MU-2584                          | ygcB                                             | ygcB | 2882575 |      |
| TU-3890 | REV | 2885450 | 2889978 | 4528 MU-2585                         | 2889945 cysH;cysI;cysJ                           | cysJ | 2888121 | 25   |
| TU-3891 | REV | 2885450 | 2889978 | 4528 MU-2585                         | 2889976 cysH;cysI;cysJ                           | cysJ | 2888121 | 56   |
| TU-3892 | REV | 2885450 | 2889978 | 4528 MU-2585                         | 2889985 cysH;cysI;cysJ                           | cysJ | 2888121 | 65   |
| TU-3893 | REV | 2892978 | 2898499 | 5521 MU-2586                         | ygcQ;ygcR;ygcS;ygcU;ygcW                         | ygcW | 2897510 |      |
| TU-3894 | REV | 2902088 | 2902513 | 425 MU-2587                          | 2902483 NT                                       |      |         |      |
| TU-3895 | REV | 2902813 | 2903438 | 625 MU-2588                          | 2903464 ygcF                                     | ygcF | 2902769 | 24   |
| TU-3896 | REV | 2904663 | 2906838 | 2175 MU-2589                         | 2905978 eno                                      | eno  | 2904665 | 15   |
| TU-3897 | REV | 2904663 | 2906838 | 2175 MU-2589                         | 2905988 eno                                      | eno  | 2904665 | 25   |
| TU-3898 | REV | 2904663 | 2906838 | 2175 MU-2589                         | 2906041 eno                                      | eno  | 2904665 | 78   |
| TU-3899 | REV | 2904663 | 2906838 | 2175 MU-2589                         | 2906123 eno                                      | eno  | 2904665 | 160  |
| TU-3900 | REV | 2904663 | 2906838 | 2175 MU-2589                         | 2906149 eno                                      | eno  | 2904665 | 186  |
| TU-3901 | REV | 2904663 | 2906838 | 2175 MU-2589                         | 2906248 eno                                      | eno  | 2904665 | 285  |
| TU-3902 | REV | 2904663 | 2907838 | 3175 MU-2589;MU-2590                 | 2907728 eno;pyrG                                 | pyrG | 2906051 | 40   |
| TU-3903 | REV | 2907863 | 2909363 | 1500 MU-2591                         | 2909279 mazG;chpA;chpR                           | chpR | 2909113 | -82  |
| TU-3904 | REV | 2907863 | 2909363 | 1500 MU-2591                         | 2909390 mazG;chpA;chpR                           | chpR | 2909113 | 29   |
| TU-3905 | REV | 2909388 | 2911938 | 2550 MU-2592                         | 2911869 relA                                     | relA | 2909439 | 196  |
| TU-3906 | REV | 2909388 | 2911938 | 2550 MU-2592                         | 2912027 relA                                     | relA | 2909439 | 354  |

|         |     |         |         |                      |                             |      |         |     |
|---------|-----|---------|---------|----------------------|-----------------------------|------|---------|-----|
| TU-3907 | REV | 2911963 | 2913213 | 1250 MU-2593         | 2913051 rumA                | rumA | 2911721 | 29  |
| TU-3908 | REV | 2916188 | 2920088 | 3900 MU-2594         | gudD;gudX;gudP              | gudP | 2918770 |     |
| TU-3909 | REV | 2920613 | 2922163 | 1550 MU-2595         | 2922159 yqcA;truC;yqcC      | yqcC | 2921806 | 24  |
| TU-3910 | REV | 2922213 | 2922588 | 375 MU-2596          | 2922546 csrB                | csrB | 2922178 | 9   |
| TU-3911 | REV | 2922213 | 2922588 | 375 MU-2596          | 2922556 csrB                | csrB | 2922178 | 19  |
| TU-3912 | REV | 2922788 | 2923313 | 525 MU-2597          | 2923335 syd                 | syd  | 2922757 | 33  |
| TU-3913 | REV | 2929940 | 2931340 | 1400 MU-2598         | fucO;fucA                   | fucA | 2931063 |     |
| TU-3914 | REV | 2938173 | 2939773 | 1600 MU-2599         | 2939689 ygdE;ygdD           | ygdD | 2939258 | 36  |
| TU-3915 | REV | 2938173 | 2939773 | 1600 MU-2599         | 2939796 ygdE;ygdD           | ygdD | 2939258 | 143 |
| TU-3916 | REV | 2939823 | 2940698 | 875 MU-2600          | 2940661 gcvA                | gcvA | 2939672 | 72  |
| TU-3917 | REV | 2940773 | 2941273 | 500 MU-2601          | 2941194 ygdI                | ygdI | 2940940 | 27  |
| TU-3918 | REV | 2940773 | 2941273 | 500 MU-2601          | 2941235 ygdI                | ygdI | 2940940 | 68  |
| TU-3919 | REV | 2943073 | 2944123 | 1050 MU-2602         | 2944074 ygdL                | ygdL | 2943058 | 210 |
| TU-3920 | REV | 2943073 | 2944123 | 1050 MU-2602         | 2944085 ygdL                | ygdL | 2943058 | 221 |
| TU-3921 | REV | 2943073 | 2944123 | 1050 MU-2602         | 2944096 ygdL                | ygdL | 2943058 | 232 |
| TU-3922 | REV | 2943073 | 2944123 | 1050 MU-2602         | 2944175 ygdL                | ygdL | 2943058 | 311 |
| TU-3923 | REV | 2944148 | 2945298 | 1150 MU-2603         | 2945225 mltA                | mltA | 2944103 | 25  |
| TU-3924 | REV | 2945623 | 2947248 | 1625 MU-2604         | 2947086 amiC                | amiC | 2945779 | 54  |
| TU-3925 | REV | 2948673 | 2954098 | 5425 MU-2605         | 2953935 recD;recB           | recB | 2950483 | -90 |
| TU-3926 | REV | 2948673 | 2954098 | 5425 MU-2605         | 2954000 recD;recB           | recB | 2950483 | -25 |
| TU-3927 | REV | 2954123 | 2957000 | 2877 MU-2606         | 2957031 ptrA                | ptrA | 2954018 | 125 |
| TU-3928 | REV | 2957075 | 2960500 | 3425 MU-2607         | recC                        | recC | 2957082 |     |
| TU-3929 | REV | 2960700 | 2962150 | 1450 MU-2608         | 2962199 ppdC;ygdB;ppdB;ppdA | ppdA | 2961729 | 0   |
| TU-3930 | REV | 2962375 | 2964300 | 1925 MU-2609         | 2964139 thyA;lgt            | lgt  | 2963184 | 80  |
| TU-3931 | REV | 2962375 | 2967000 | 4625 MU-2609;MU-2610 | 2967018 thyA;lgt;ptsP;rppH  | rppH | 2966469 | 19  |
| TU-3932 | REV | 2967352 | 2967498 | 146 MU-2611          | ygdT                        | ygdT | 2967352 |     |
| TU-3933 | REV | 2970728 | 2972578 | 1850 MU-2612         | 2972534 lplT                | lplT | 2970691 | 650 |
| TU-3934 | REV | 2970728 | 2972578 | 1850 MU-2612         | 2972645 lplT                | lplT | 2970691 | 761 |
| TU-3935 | REV | 2972628 | 2974053 | 1425 MU-2613         | 2974072 aas                 | aas  | 2971877 | 36  |
| TU-3936 | REV | 2974153 | 2974178 | 25 MU-2614           | 2974189 omrA                | omrA | 2974124 | -22 |
| TU-3937 | REV | 2974253 | 2974378 | 125 MU-2615          | 2974407 omrB                | omrB | 2974332 | 0   |
| TU-3938 | REV | 2975353 | 2976928 | 1575 MU-2616         | 2976947 lysA                | lysA | 2975659 | 26  |
| TU-3939 | REV | 2977803 | 2980403 | 2600 MU-2617         | 2980232 ygeA;araE           | araE | 2978786 | 28  |
| TU-3940 | REV | 2980703 | 2981978 | 1275 MU-2618         | kduD;kduI                   | kduI | 2981310 |     |
| TU-3941 | REV | 2982530 | 2983630 | 1100 MU-2619         | 2983635 yqeF                | yqeF | 2982433 | 21  |
| TU-3942 | REV | 2987957 | 2988382 | 425 MU-2620          | yqeK                        | yqeK | 2987957 |     |
| TU-3943 | REV | 2992482 | 2993114 | 632 MU-2621          | ygeK                        | ygeK | 2992482 |     |
| TU-3944 | REV | 2993336 | 2994382 | 1046 MU-2622         | ygeN;ygeO                   | ygeO | 2993984 |     |
| TU-3945 | REV | 2994300 | 2995800 | 1500 MU-2623         | 2995918 insD;insC           | insC | 2995257 | 296 |
| TU-3946 | REV | 2995950 | 2996825 | 875 MU-2624          | ygeQ                        | ygeQ | 2995714 |     |
| TU-3947 | REV | 2996975 | 2997075 | 100 MU-2625          | 2997079 glyU                | glyU | 2997006 | 0   |
| TU-3948 | REV | 2997225 | 2998125 | 900 MU-2626          | 2998266 ygeR                | ygeR | 2997158 | 353 |
| TU-3949 | REV | 3002150 | 3003850 | 1700 MU-2627         | 3003869 ygeV                | ygeV | 3002030 | 61  |
| TU-3950 | REV | 3010479 | 3013104 | 2625 MU-2628         | 3013059 yqeB;yqeC           | yqeC | 3012309 | -20 |
| TU-3951 | REV | 3014254 | 3014354 | 100 MU-2629          | NT                          |      |         |     |
| TU-3952 | REV | 3023279 | 3023654 | 375 MU-2630          | 3023597 NT                  |      |         |     |

|         |     |         |         |                      |                             |      |         |     |
|---------|-----|---------|---------|----------------------|-----------------------------|------|---------|-----|
| TU-3953 | REV | 3023279 | 3023654 | 375 MU-2630          | 3023627 NT                  |      |         |     |
| TU-3954 | REV | 3026552 | 3028902 | 2350 MU-2631         | ygfS;ygfT                   | ygfT | 3027034 |     |
| TU-3955 | REV | 3031802 | 3034327 | 2525 MU-2632         | 3034313 lysS;prfB           | prfB | 3033206 | 9   |
| TU-3956 | REV | 3031802 | 3034327 | 2525 MU-2632         | 3034336 lysS;prfB           | prfB | 3033206 | 32  |
| TU-3957 | REV | 3031802 | 3034327 | 2525 MU-2632         | 3034346 lysS;prfB           | prfB | 3033206 | 42  |
| TU-3958 | REV | 3034377 | 3037902 | 3525 MU-2633         | 3037790 recJ;dsbC;xerD      | xerD | 3036869 | 25  |
| TU-3959 | REV | 3034377 | 3037902 | 3525 MU-2633         | 3037800 recJ;dsbC;xerD      | xerD | 3036869 | 35  |
| TU-3960 | REV | 3038252 | 3039252 | 1000 MU-2634         | 3039121 ygfX;ygfY           | ygfY | 3038826 | 29  |
| TU-3961 | REV | 3040377 | 3041202 | 825 MU-2635          | 3041333 yqfA                | yqfA | 3040511 | 163 |
| TU-3962 | REV | 3041302 | 3041702 | 400 MU-2636          | 3041676 yqfB                | yqfB | 3041334 | 31  |
| TU-3963 | REV | 3043277 | 3043902 | 625 MU-2637          | ygfF                        | ygfF | 3043180 |     |
| TU-3964 | REV | 3044127 | 3047102 | 2975 MU-2638         | 3047178 gcvP                | gcvP | 3044190 | 115 |
| TU-3965 | REV | 3044127 | 3048777 | 4650 MU-2638;MU-2639 | 3048789 gcvP;gcvH;gcvT      | gcvT | 3047595 | 100 |
| TU-3966 | REV | 3044127 | 3048777 | 4650 MU-2638;MU-2639 | 3048798 gcvP;gcvH;gcvT      | gcvT | 3047595 | 109 |
| TU-3967 | REV | 3049052 | 3053477 | 4425 MU-2640         | 3053495 visC;ubiH;pepP;ygfB | ygfB | 3052888 | 29  |
| TU-3968 | REV | 3055202 | 3056452 | 1250 MU-2641         | 3056477 serA                | serA | 3055200 | 45  |
| TU-3969 | REV | 3056652 | 3057452 | 800 MU-2642          | 3057375 rpiA                | rpiA | 3056688 | 28  |
| TU-3970 | REV | 3057403 | 3057723 | 320 MU-2643          | yqfE                        | yqfE | 3057403 |     |
| TU-3971 | REV | 3064299 | 3065195 | 896 MU-2644          | ygfI                        | ygfI | 3064299 |     |
| TU-3972 | REV | 3065383 | 3066133 | 750 MU-2645          | 3066137 yggE                | yggE | 3065362 | 35  |
| TU-3973 | REV | 3065383 | 3066133 | 750 MU-2645          | 3066148 yggE                | yggE | 3065362 | 46  |
| TU-3974 | REV | 3066183 | 3066833 | 650 MU-2646          | 3066858 argO                | argO | 3066195 | 28  |
| TU-3975 | REV | 3066933 | 3067883 | 950 MU-2647          | 3067836 mscS                | mscS | 3066969 | 7   |
| TU-3976 | REV | 3066933 | 3067883 | 950 MU-2647          | 3067856 mscS                | mscS | 3066969 | 27  |
| TU-3977 | REV | 3066933 | 3067883 | 950 MU-2647          | 3067893 mscS                | mscS | 3066969 | 64  |
| TU-3978 | REV | 3067958 | 3069308 | 1350 MU-2648         | 3069449 fbaA                | fbaA | 3068187 | 183 |
| TU-3979 | REV | 3067958 | 3069308 | 1350 MU-2648         | 3069477 fbaA                | fbaA | 3068187 | 211 |
| TU-3980 | REV | 3069333 | 3070883 | 1550 MU-2649         | 3070670 pgk                 | pgk  | 3069481 | 26  |
| TU-3981 | REV | 3069333 | 3070883 | 1550 MU-2649         | 3070703 pgk                 | pgk  | 3069481 | 59  |
| TU-3982 | REV | 3069333 | 3070883 | 1550 MU-2649         | 3070757 pgk                 | pgk  | 3069481 | 113 |
| TU-3983 | REV | 3069333 | 3071908 | 2575 MU-2649;MU-2650 | 3071845 pgk;epd             | epd  | 3070694 | 132 |
| TU-3984 | REV | 3071958 | 3073458 | 1500 MU-2651         | 3073487 yggC;yggD           | yggD | 3072708 | 270 |
| TU-3985 | REV | 3073239 | 3077352 | 4113 MU-2652         | ygfF;yggP;cmtA;cmtB         | cmtB | 3076909 |     |
| TU-3986 | REV | 3077696 | 3079721 | 2025 MU-2653         | 3079737 tktA                | tktA | 3077666 | 80  |
| TU-3987 | REV | 3080621 | 3081899 | 1278 MU-2654         | 3081893 speB                | speB | 3080899 | 74  |
| TU-3988 | REV | 3080621 | 3081899 | 1278 MU-2654         | 3081908 speB                | speB | 3080899 | 89  |
| TU-3989 | REV | 3080621 | 3081899 | 1278 MU-2654         | 3081948 speB                | speB | 3080899 | 129 |
| TU-3990 | REV | 3080621 | 3081899 | 1278 MU-2654         | 3081968 speB                | speB | 3080899 | 149 |
| TU-3991 | REV | 3080621 | 3081899 | 1278 MU-2654         | 3081990 speB                | speB | 3080899 | 171 |
| TU-3992 | REV | 3081924 | 3083899 | 1975 MU-2655         | 3083950 speA                | speA | 3081957 | 17  |
| TU-3993 | REV | 3081924 | 3083899 | 1975 MU-2655         | 3084078 speA                | speA | 3081957 | 145 |
| TU-3994 | REV | 3083924 | 3084399 | 475 MU-2656          | 3084420 yqgB                | yqgB | 3083942 | 347 |
| TU-3995 | REV | 3084421 | 3084672 | 251 MU-2657          | ygqD                        | ygqD | 3084421 |     |
| TU-3996 | REV | 3092122 | 3093102 | 980 MU-2658          | 3093107 yggR                | yggR | 3092122 | 5   |
| TU-3997 | REV | 3096580 | 3097587 | 1007 MU-2659         | ygqM                        | ygqM | 3096580 |     |
| TU-3998 | REV | 3097949 | 3098749 | 800 MU-2660          | ansB                        | ansB | 3097704 |     |



|         |     |         |         |                              |                                                 |      |         |     |
|---------|-----|---------|---------|------------------------------|-------------------------------------------------|------|---------|-----|
| TU-3999 | REV | 3098974 | 3099649 | 675 MU-2661                  | 3099822 yggN                                    | yggN | 3098926 | 177 |
| TU-4000 | REV | 3099699 | 3100249 | 550 MU-2662                  | 3100179 yggL                                    | yggL | 3099829 | 24  |
| TU-4001 | REV | 3099699 | 3100249 | 550 MU-2662                  | 3100215 yggL                                    | yggL | 3099829 | 60  |
| TU-4002 | REV | 3099699 | 3100249 | 550 MU-2662                  | 3100221 yggL                                    | yggL | 3099829 | 66  |
| TU-4003 | REV | 3099699 | 3100249 | 550 MU-2662                  | 3100257 yggL                                    | yggL | 3099829 | 102 |
| TU-4004 | REV | 3099699 | 3100249 | 550 MU-2662                  | 3100324 yggL                                    | yggL | 3099829 | 169 |
| TU-4005 | REV | 3099699 | 3101099 | 1400 MU-2662;MU-2663         | 3101025 yggL;trmI                               | trmI | 3100155 | 151 |
| TU-4006 | REV | 3105079 | 3107263 | 2184 MU-2664                 | 3107281 speC                                    | speC | 3105042 | 104 |
| TU-4007 | REV | 3105079 | 3107263 | 2184 MU-2664                 | 3107308 speC                                    | speC | 3105042 | 131 |
| TU-4008 | REV | 3108938 | 3110988 | 2050 MU-2665                 | 3111057 yghD;yghE;yghF                          | yghF | 3110115 | 115 |
| TU-4009 | REV | 3111063 | 3111938 | 875 MU-2666                  | 3111570 yghG                                    | yghG | 3111089 | 71  |
| TU-4010 | REV | 3111063 | 3111938 | 875 MU-2666                  | 3111770 yghG                                    | yghG | 3111089 | 271 |
| TU-4011 | REV | 3111063 | 3111938 | 875 MU-2666                  | 3111918 yghG                                    | yghG | 3111089 | 419 |
| TU-4012 | REV | 3111565 | 3112374 | 809 MU-2667                  | pppA                                            | pppA | 3111565 |     |
| TU-4013 | REV | 3112388 | 3117338 | 4950 MU-2668                 | 3117349 yghJ                                    | yghJ | 3112572 | 215 |
| TU-4014 | REV | 3112388 | 3117338 | 4950 MU-2668                 | 3117362 yghJ                                    | yghJ | 3112572 | 228 |
| TU-4015 | REV | 3117788 | 3119238 | 1450 MU-2669                 | 3119364 glcA                                    | glcA | 3117619 | 63  |
| TU-4016 | REV | 3117788 | 3122838 | 5050 MU-2669;MU-2670         | 3122752 glcA;glcB;glcG                          | glcG | 3121849 | 499 |
| TU-4017 | REV | 3117788 | 3122838 | 5050 MU-2669;MU-2670         | 3122796 glcA;glcB;glcG                          | glcG | 3121849 | 543 |
| TU-4018 | REV | 3117788 | 3126138 | 8350 MU-2669;MU-2670;MU-2671 | 3126098 glcA;glcB;glcG;glcF;glcE;glcD           | glcD | 3124544 | 55  |
| TU-4019 | REV | 3117788 | 3126138 | 8350 MU-2669;MU-2670;MU-2671 | 3126195 glcA;glcB;glcG;glcF;glcE;glcD           | glcD | 3124544 | 152 |
| TU-4020 | REV | 3127065 | 3128165 | 1100 MU-2672                 | yghO                                            | yghO | 3127065 |     |
| TU-4021 | REV | 3129363 | 3131979 | 2616 MU-2673                 | yghQ;yghR;yghS                                  | yghS | 3131266 |     |
| TU-4022 | REV | 3132894 | 3134393 | 1499 MU-2674                 | pitB                                            | pitB | 3132894 |     |
| TU-4023 | REV | 3134713 | 3136613 | 1900 MU-2675                 | 3136551 gsp                                     | gsp  | 3134685 | 7   |
| TU-4024 | REV | 3137838 | 3141188 | 3350 MU-2676                 | 3141054 hybG;hybF;hybE;hybD;hybC                | hybC | 3139308 | 43  |
| TU-4025 | REV | 3137838 | 3141188 | 3350 MU-2676                 | 3141126 hybG;hybF;hybE;hybD;hybC                | hybC | 3139308 | 115 |
| TU-4026 | REV | 3137838 | 3144413 | 6575 MU-2676;MU-2677         | 3144309 hybG;hybF;hybE;hybD;hybC;hybB;hybA;hybO | hybO | 3143165 | 26  |
| TU-4027 | REV | 3137838 | 3144413 | 6575 MU-2676;MU-2677         | 3144385 hybG;hybF;hybE;hybD;hybC;hybB;hybA;hybO | hybO | 3143165 | 102 |
| TU-4028 | REV | 3144438 | 3144763 | 325 MU-2678                  | 3144780 yghW                                    | yghW | 3144472 | 21  |
| TU-4029 | REV | 3144863 | 3145763 | 900 MU-2679                  | 3145787 yghX                                    | yghX | 3144878 | 74  |
| TU-4030 | REV | 3147013 | 3147488 | 475 MU-2680                  | 3147518 yqhA                                    | yqhA | 3146999 | 25  |
| TU-4031 | REV | 3148638 | 3150063 | 1425 MU-2681                 | 3150038 exbD;exbB                               | exbB | 3149272 | 32  |
| TU-4032 | REV | 3151588 | 3153197 | 1609 MU-2682                 | 3153212 yqhC                                    | yqhC | 3152284 | -28 |
| TU-4033 | REV | 3156072 | 3156172 | 100 MU-2683                  | NT                                              |      |         |     |
| TU-4034 | REV | 3156697 | 3159222 | 2525 MU-2684                 | 3159202 ygiQ                                    | ygiQ | 3156949 | 34  |
| TU-4035 | REV | 3159297 | 3160672 | 1375 MU-2685                 | 3160708 ftsP                                    | ftsP | 3159279 | 17  |
| TU-4036 | REV | 3159297 | 3160672 | 1375 MU-2685                 | 3160864 ftsP                                    | ftsP | 3159279 | 173 |
| TU-4037 | REV | 3160697 | 3161647 | 950 MU-2686                  | 3161587 plsC                                    | plsC | 3160766 | 84  |
| TU-4038 | REV | 3161697 | 3164024 | 2327 MU-2687                 | 3164043 parC                                    | parC | 3161737 | 48  |
| TU-4039 | REV | 3164324 | 3166574 | 2250 MU-2688                 | 3166584 ygiS;ygiT;mqsR                          | mqsR | 3166270 | 18  |
| TU-4040 | REV | 3166799 | 3167749 | 950 MU-2689                  | 3167731 ygiV;ygiW                               | ygiW | 3167306 | 33  |
| TU-4041 | REV | 3169901 | 3170233 | 332 MU-2690                  | ygiZ                                            | ygiZ | 3169901 |     |
| TU-4042 | REV | 3171477 | 3173627 | 2150 MU-2691                 | 3173667 parE                                    | parE | 3171526 | 249 |

|         |     |         |         |              |                                    |      |         |     |
|---------|-----|---------|---------|--------------|------------------------------------|------|---------|-----|
| TU-4043 | REV | 3173652 | 3174952 | 1300 MU-2692 | 3174987 yqiA;cpdA                  | cpdA | 3174028 | 132 |
| TU-4044 | REV | 3174977 | 3175852 | 875 MU-2693  | 3176014 yqiB;nudF                  | nudF | 3175303 | 82  |
| TU-4045 | REV | 3179852 | 3180302 | 450 MU-2694  | 3180462 ygiD                       | ygiD | 3179641 | 6   |
| TU-4046 | REV | 3181327 | 3181602 | 275 MU-2695  | 3181662 NT                         |      |         |     |
| TU-4047 | REV | 3181327 | 3181602 | 275 MU-2695  | 3181669 NT                         |      |         |     |
| TU-4048 | REV | 3181327 | 3181602 | 275 MU-2695  | 3181678 NT                         |      |         |     |
| TU-4049 | REV | 3181827 | 3182727 | 900 MU-2696  | 3182740 ribB;sroG                  | sroG | 3182592 | 0   |
| TU-4050 | REV | 3185202 | 3185427 | 225 MU-2697  | NT                                 |      |         |     |
| TU-4051 | REV | 3189777 | 3190127 | 350 MU-2698  | 3189979 glgS                       | glgS | 3189761 | 18  |
| TU-4052 | REV | 3189777 | 3190127 | 350 MU-2698  | 3189986 glgS                       | glgS | 3189761 | 25  |
| TU-4053 | REV | 3189777 | 3190127 | 350 MU-2698  | 3189995 glgS                       | glgS | 3189761 | 34  |
| TU-4054 | REV | 3189777 | 3190127 | 350 MU-2698  | 3190002 glgS                       | glgS | 3189761 | 41  |
| TU-4055 | REV | 3189777 | 3190127 | 350 MU-2698  | 3190011 glgS                       | glgS | 3189761 | 50  |
| TU-4056 | REV | 3189777 | 3190127 | 350 MU-2698  | 3190024 glgS                       | glgS | 3189761 | 63  |
| TU-4057 | REV | 3190227 | 3190327 | 100 MU-2699  | 3190379 NT                         |      |         |     |
| TU-4058 | REV | 3192677 | 3192927 | 250 MU-2700  | 3192887 rygD                       | rygD | 3192745 | 0   |
| TU-4059 | REV | 3193052 | 3193352 | 300 MU-2701  | 3193271 rygE                       | rygE | 3193121 | 9   |
| TU-4060 | REV | 3193402 | 3194852 | 1450 MU-2702 | 3194803 rfaE                       | rfaE | 3193342 | 28  |
| TU-4061 | REV | 3194877 | 3199027 | 4150 MU-2703 | 3199054 glnE;ygiF                  | ygiF | 3197686 | 67  |
| TU-4062 | REV | 3201252 | 3202202 | 950 MU-2704  | 3202205 bacA                       | bacA | 3201332 | 52  |
| TU-4063 | REV | 3201252 | 3202202 | 950 MU-2704  | 3202243 bacA                       | bacA | 3201332 | 90  |
| TU-4064 | REV | 3202252 | 3202627 | 375 MU-2705  | 3202659 folB                       | folB | 3202243 | 48  |
| TU-4065 | REV | 3203577 | 3204277 | 700 MU-2706  | 3204386 ttdR                       | ttdR | 3203346 | 108 |
| TU-4066 | REV | 3207427 | 3208552 | 1125 MU-2707 | 3208588 ygjD                       | ygjD | 3207552 | 23  |
| TU-4067 | REV | 3212777 | 3213602 | 825 MU-2708  | 3213518 mug                        | mug  | 3212989 | 23  |
| TU-4068 | REV | 3212777 | 3213602 | 825 MU-2708  | 3213543 mug                        | mug  | 3212989 | 48  |
| TU-4069 | REV | 3213777 | 3214527 | 750 MU-2709  | 3214559 yqjH                       | yqjH | 3213749 | 46  |
| TU-4070 | REV | 3215427 | 3217102 | 1675 MU-2710 | 3217140 aer                        | aer  | 3215578 | 42  |
| TU-4071 | REV | 3218937 | 3219269 | 332 MU-2711  | ygjH                               | ygjH | 3218937 |     |
| TU-4072 | REV | 3231753 | 3232603 | 850 MU-2712  | 3232782 yggM;yggN                  | yggN | 3232163 | 305 |
| TU-4073 | REV | 3232753 | 3233903 | 1150 MU-2713 | 3233919 rlmG                       | rlmG | 3232761 | 22  |
| TU-4074 | REV | 3240395 | 3242920 | 2525 MU-2714 | 3242809 ygjV;uxaA;uxaC             | uxaC | 3241351 | 46  |
| TU-4075 | REV | 3251399 | 3252274 | 875 MU-2715  | 3252264 yhaJ                       | yhaJ | 3251340 | 28  |
| TU-4076 | REV | 3253774 | 3255949 | 2175 MU-2716 | 3256371 yhaM;yhaO                  | yhaO | 3254701 | 339 |
| TU-4077 | REV | 3256307 | 3265087 | 8780 MU-2717 | tdcG;tdcF;tdcE;tdcD;tdcC;tdcB;tdcA | tdcA | 3264149 |     |
| TU-4078 | REV | 3267826 | 3268645 | 819 MU-2718  | 3268614 rnpB                       | rnpB | 3268238 | 0   |
| TU-4079 | REV | 3268695 | 3272045 | 3350 MU-2719 | garK;garR;garL;garP                | garP | 3271595 |     |
| TU-4080 | REV | 3275695 | 3276695 | 1000 MU-2720 | 3276727 agaR                       | agaR | 3275878 | 40  |
| TU-4081 | REV | 3287196 | 3287921 | 725 MU-2721  | 3287928 NT                         |      |         |     |
| TU-4082 | REV | 3290271 | 3291646 | 1375 MU-2722 | yraL                               | yraL | 3290497 |     |
| TU-4083 | REV | 3291996 | 3292496 | 500 MU-2723  | 3292525 NT                         |      |         |     |
| TU-4084 | REV | 3295121 | 3296921 | 1800 MU-2724 | 3296934 yraQ;yraR                  | yraR | 3296233 | 66  |
| TU-4085 | REV | 3297521 | 3297971 | 450 MU-2725  | 3297958 yhbP                       | yhbP | 3297494 | 21  |
| TU-4086 | REV | 3298196 | 3299421 | 1225 MU-2726 | 3299323 yhbS;yhbT                  | yhbT | 3298774 | 25  |
| TU-4087 | REV | 3298196 | 3299421 | 1225 MU-2726 | 3299434 yhbS;yhbT                  | yhbT | 3298774 | 136 |
| TU-4088 | REV | 3302646 | 3303846 | 1200 MU-2727 | 3303882 mtr                        | mtr  | 3302595 | 43  |

|         |     |         |         |                              |         |                               |      |         |     |
|---------|-----|---------|---------|------------------------------|---------|-------------------------------|------|---------|-----|
| TU-4089 | REV | 3303946 | 3306196 | 2250 MU-2728                 | 3306034 | deaD                          | deaD | 3303993 | 152 |
| TU-4090 | REV | 3306221 | 3307096 | 875 MU-2729                  | 3307126 | nlpI                          | nlpI | 3306062 | 180 |
| TU-4091 | REV | 3307121 | 3309346 | 2225 MU-2730                 | 3309271 | pnp                           | pnp  | 3307055 | 81  |
| TU-4092 | REV | 3307121 | 3309346 | 2225 MU-2730                 | 3309309 | pnp                           | pnp  | 3307055 | 119 |
| TU-4093 | REV | 3309446 | 3309796 | 350 MU-2731                  | 3309768 | rpsO                          | rpsO | 3309437 | 62  |
| TU-4094 | REV | 3309446 | 3309796 | 350 MU-2731                  | 3309806 | rpsO                          | rpsO | 3309437 | 100 |
| TU-4095 | REV | 3309446 | 3311196 | 1750 MU-2731;MU-2732         | 3311247 | rpsO;truB;rbfA                | rbfA | 3310799 | 47  |
| TU-4096 | REV | 3309446 | 3316071 | 6625 MU-2731;MU-2732;MU-2733 | 3316071 | rpsO;truB;rbfA;infB;nusA;yhbC | yhbC | 3315576 | 37  |
| TU-4097 | REV | 3309446 | 3316071 | 6625 MU-2731;MU-2732;MU-2733 | 3316119 | rpsO;truB;rbfA;infB;nusA;yhbC | yhbC | 3315576 | 85  |
| TU-4098 | REV | 3309446 | 3316071 | 6625 MU-2731;MU-2732;MU-2733 | 3316211 | rpsO;truB;rbfA;infB;nusA;yhbC | yhbC | 3315576 | 177 |
| TU-4099 | REV | 3316121 | 3316396 | 275 MU-2734                  | 3316311 | metY                          | metY | 3316235 | 0   |
| TU-4100 | REV | 3316121 | 3316396 | 275 MU-2734                  | 3316397 | metY                          | metY | 3316235 | 86  |
| TU-4101 | REV | 3318010 | 3319635 | 1625 MU-2735                 |         | yhbX                          | yhbX | 3318010 |     |
| TU-4102 | REV | 3320096 | 3320696 | 600 MU-2736                  | 3320611 | leuU;secG                     | secG | 3320195 | 84  |
| TU-4103 | REV | 3320746 | 3322296 | 1550 MU-2737                 | 3322307 | glmM                          | glmM | 3320755 | 215 |
| TU-4104 | REV | 3320746 | 3322296 | 1550 MU-2737                 | 3322347 | glmM                          | glmM | 3320755 | 255 |
| TU-4105 | REV | 3322321 | 3323596 | 1275 MU-2738                 | 3323252 | folP                          | folP | 3322085 | 319 |
| TU-4106 | REV | 3322321 | 3323596 | 1275 MU-2738                 | 3323526 | folP                          | folP | 3322085 | 593 |
| TU-4107 | REV | 3323621 | 3324996 | 1375 MU-2739                 | 3325000 | hflB                          | hflB | 3323023 | 43  |
| TU-4108 | REV | 3323621 | 3325721 | 2100 MU-2739;MU-2740         | 3325753 | hflB;rrmJ                     | rrmJ | 3325057 | 67  |
| TU-4109 | REV | 3325746 | 3326871 | 1125 MU-2741                 | 3326835 | greA                          | greA | 3326261 | 98  |
| TU-4110 | REV | 3325746 | 3326871 | 1125 MU-2741                 | 3326874 | greA                          | greA | 3326261 | 137 |
| TU-4111 | REV | 3328196 | 3330046 | 1850 MU-2742                 | 3330183 | obgE                          | obgE | 3328604 | 407 |
| TU-4112 | REV | 3328196 | 3330796 | 2600 MU-2742;MU-2743         | 3330932 | obgE;yhbE                     | yhbE | 3329792 | 175 |
| TU-4113 | REV | 3330871 | 3331621 | 750 MU-2744                  | 3331479 | rplU                          | rplU | 3331162 | 6   |
| TU-4114 | REV | 3330871 | 3331621 | 750 MU-2744                  | 3331529 | rplU                          | rplU | 3331162 | 56  |
| TU-4115 | REV | 3330871 | 3331621 | 750 MU-2744                  | 3331538 | rplU                          | rplU | 3331162 | 65  |
| TU-4116 | REV | 3333121 | 3334471 | 1350 MU-2745                 | 3334539 | murA                          | murA | 3333257 | 23  |
| TU-4117 | REV | 3333121 | 3334471 | 1350 MU-2745                 | 3334577 | murA                          | murA | 3333257 | 61  |
| TU-4118 | REV | 3334496 | 3334921 | 425 MU-2746                  | 3334854 | yrbA                          | yrbA | 3334571 | 29  |
| TU-4119 | REV | 3334946 | 3335896 | 950 MU-2747                  | 3336077 | yrbB;yrbC                     | yrbC | 3335278 | 164 |
| TU-4120 | REV | 3334946 | 3335896 | 950 MU-2747                  | 3336084 | yrbB;yrbC                     | yrbC | 3335278 | 171 |
| TU-4121 | REV | 3334946 | 3338247 | 3301 MU-2747;MU-2748         | 3338123 | yrbB;yrbC;yrbD;yrbE;yrbF      | yrbF | 3337278 | 36  |
| TU-4122 | REV | 3334946 | 3338247 | 3301 MU-2747;MU-2748         | 3338154 | yrbB;yrbC;yrbD;yrbE;yrbF      | yrbF | 3337278 | 67  |
| TU-4123 | REV | 3347272 | 3348654 | 1382 MU-2749                 | 3348510 | mtgA;elbB                     | elbB | 3347828 | 29  |
| TU-4124 | REV | 3347272 | 3348654 | 1382 MU-2749                 | 3348532 | mtgA;elbB                     | elbB | 3347828 | 51  |
| TU-4125 | REV | 3347272 | 3348654 | 1382 MU-2749                 | 3348571 | mtgA;elbB                     | elbB | 3347828 | 90  |
| TU-4126 | REV | 3348704 | 3351029 | 2325 MU-2750                 | 3351071 | arcB                          | arcB | 3348711 | 24  |
| TU-4127 | REV | 3351204 | 3352054 | 850 MU-2751                  | 3352167 | yhcC                          | yhcC | 3351143 | 95  |
| TU-4128 | REV | 3358804 | 3358879 | 75 MU-2752                   | 3358901 | NT                            |      |         |     |
| TU-4129 | REV | 3363579 | 3364754 | 1175 MU-2753                 |         | insH                          | insH | 3363724 |     |
| TU-4130 | REV | 3365729 | 3365754 | 25 MU-2754                   | 3365791 | NT                            |      |         |     |
| TU-4131 | REV | 3367134 | 3371609 | 4475 MU-2755                 | 3371642 | yhcH;nanK;nanE;nanT;nanA      | nanA | 3370705 | 44  |
| TU-4132 | REV | 3371734 | 3372509 | 775 MU-2756                  | 3372540 | nanR                          | nanR | 3371720 | 29  |
| TU-4133 | REV | 3374309 | 3375559 | 1250 MU-2757                 | 3375467 | sspB;sspA                     | sspA | 3374804 | 25  |
| TU-4134 | REV | 3374309 | 3375559 | 1250 MU-2757                 | 3375504 | sspB;sspA                     | sspA | 3374804 | 62  |

|         |     |         |         |                      |                                                                         |      |         |     |
|---------|-----|---------|---------|----------------------|-------------------------------------------------------------------------|------|---------|-----|
| TU-4135 | REV | 3374309 | 3375559 | 1250 MU-2757         | 3375587 sspB;sspA                                                       | sspA | 3374804 | 145 |
| TU-4136 | REV | 3375859 | 3376809 | 950 MU-2758          | 3376678 rpsI;rpIM                                                       | rpIM | 3376245 | 5   |
| TU-4137 | REV | 3375859 | 3376809 | 950 MU-2758          | 3376692 rpsI;rpIM                                                       | rpIM | 3376245 | 19  |
| TU-4138 | REV | 3375859 | 3376809 | 950 MU-2758          | 3376796 rpsI;rpIM                                                       | rpIM | 3376245 | 123 |
| TU-4139 | REV | 3375859 | 3376809 | 950 MU-2758          | 3376830 rpsI;rpIM                                                       | rpIM | 3376245 | 157 |
| TU-4140 | REV | 3376909 | 3378084 | 1175 MU-2759         | 3378033 yhcM                                                            | yhcM | 3376892 | 14  |
| TU-4141 | REV | 3376909 | 3378084 | 1175 MU-2759         | 3378078 yhcM                                                            | yhcM | 3376892 | 59  |
| TU-4142 | REV | 3381359 | 3382509 | 1150 MU-2760         | 3382316 mdh                                                             | mdh  | 3381352 | 26  |
| TU-4143 | REV | 3381359 | 3382509 | 1150 MU-2760         | 3382336 mdh                                                             | mdh  | 3381352 | 46  |
| TU-4144 | REV | 3381359 | 3382509 | 1150 MU-2760         | 3382494 mdh                                                             | mdh  | 3381352 | 204 |
| TU-4145 | REV | 3383878 | 3384178 | 300 MU-2761          | 3384191 yhcO                                                            | yhcO | 3383879 | 40  |
| TU-4146 | REV | 3385178 | 3387453 | 2275 MU-2762         | 3387503 aaeB;aaeA;aaeX                                                  | aaeX | 3387156 | 144 |
| TU-4147 | REV | 3388578 | 3390578 | 2000 MU-2763         | 3390086 tldD                                                            | tldD | 3388605 | 36  |
| TU-4148 | REV | 3388578 | 3390578 | 2000 MU-2763         | 3390139 tldD                                                            | tldD | 3388605 | 89  |
| TU-4149 | REV | 3388578 | 3390578 | 2000 MU-2763         | 3390443 tldD                                                            | tldD | 3388605 | 393 |
| TU-4150 | REV | 3388578 | 3390578 | 2000 MU-2763         | 3390673 tldD                                                            | tldD | 3388605 | 623 |
| TU-4151 | REV | 3390628 | 3395978 | 5350 MU-2764         | 3395947 yhdP;rng                                                        | rng  | 3394348 | 130 |
| TU-4152 | REV | 3390628 | 3395978 | 5350 MU-2764         | 3396009 yhdP;rng                                                        | rng  | 3394348 | 192 |
| TU-4153 | REV | 3396003 | 3396528 | 525 MU-2765          | 3396618 yhdE                                                            | yhdE | 3395807 | 218 |
| TU-4154 | REV | 3396003 | 3396528 | 525 MU-2765          | 3396643 yhdE                                                            | yhdE | 3395807 | 243 |
| TU-4155 | REV | 3396553 | 3399378 | 2825 MU-2766         | 3399149 mreD;mreC;mreB                                                  | mreB | 3398066 | 40  |
| TU-4156 | REV | 3396553 | 3399378 | 2825 MU-2766         | 3399214 mreD;mreC;mreB                                                  | mreB | 3398066 | 105 |
| TU-4157 | REV | 3399453 | 3401403 | 1950 MU-2767         | 3401381 csrD                                                            | csrD | 3399414 | 27  |
| TU-4158 | REV | 3408156 | 3408256 | 100 MU-2768          | 3408239 NT                                                              |      |         |     |
| TU-4159 | REV | 3410825 | 3411487 | 662 MU-2769          | envR                                                                    | envR | 3410825 |     |
| TU-4160 | REV | 3421432 | 3427207 | 5775 MU-2770         | 3427033 rrfF;thrV;rrfD;rrlD;alaU;ileU;rrsD                              | rrsD | 3425243 | 249 |
| TU-4161 | REV | 3421432 | 3427207 | 5775 MU-2770         | 3427071 rrfF;thrV;rrfD;rrlD;alaU;ileU;rrsD                              | rrsD | 3425243 | 287 |
| TU-4162 | REV | 3427757 | 3429032 | 1275 MU-2771         | 3429107 yrdB;aroE                                                       | aroE | 3428042 | 247 |
| TU-4163 | REV | 3427757 | 3430032 | 2275 MU-2771;MU-2772 | 3430049 yrdB;aroE;rimN;yrdD                                             | yrdD | 3429442 | 65  |
| TU-4164 | REV | 3430057 | 3430707 | 650 MU-2773          | 3430625 smg                                                             | smg  | 3430013 | 139 |
| TU-4165 | REV | 3430757 | 3431632 | 875 MU-2774          | 3431625 smf                                                             | smf  | 3430458 | 43  |
| TU-4166 | REV | 3436082 | 3437532 | 1450 MU-2775         | 3437566 yhdL;zntR;yhdN                                                  | yhdN | 3437163 | 35  |
| TU-4167 | REV | 3437647 | 3441122 | 3475 MU-2776         | 3440574 rplQ;rpoA;rpsD;rpsK;rpsM                                        | rpsM | 3440137 | 81  |
| TU-4168 | REV | 3437647 | 3441122 | 3475 MU-2776         | 3440580 rplQ;rpoA;rpsD;rpsK;rpsM                                        | rpsM | 3440137 | 87  |
| TU-4169 | REV | 3437647 | 3441122 | 3475 MU-2776         | 3440584 rplQ;rpoA;rpsD;rpsK;rpsM                                        | rpsM | 3440137 | 91  |
| TU-4170 | REV | 3437647 | 3441122 | 3475 MU-2776         | 3440615 rplQ;rpoA;rpsD;rpsK;rpsM                                        | rpsM | 3440137 | 122 |
| TU-4171 | REV | 3437647 | 3441122 | 3475 MU-2776         | 3440622 rplQ;rpoA;rpsD;rpsK;rpsM                                        | rpsM | 3440137 | 129 |
| TU-4172 | REV | 3437647 | 3441122 | 3475 MU-2776         | 3440636 rplQ;rpoA;rpsD;rpsK;rpsM                                        | rpsM | 3440137 | 143 |
| TU-4173 | REV | 3441147 | 3446347 | 5200 MU-2777         | 3446318 rpmJ;secY;rplO;rpmD;rpsE;rplR;rplF;rpsH;rp<br>sN;rplE;rplX;rplN | rplN | 3445800 | 147 |
| TU-4174 | REV | 3441147 | 3446347 | 5200 MU-2777         | 3446323 rpmJ;secY;rplO;rpmD;rpsE;rplR;rplF;rpsH;rp<br>sN;rplE;rplX;rplN | rplN | 3445800 | 152 |
| TU-4175 | REV | 3441147 | 3446347 | 5200 MU-2777         | 3446364 rpmJ;secY;rplO;rpmD;rpsE;rplR;rplF;rpsH;rp<br>sN;rplE;rplX;rplN | rplN | 3445800 | 193 |
| TU-4176 | REV | 3446372 | 3451497 | 5125 MU-2778         | 3451312 rpsQ;rpmC;rplP;rpsC;rplV;rpsS;rplB;rplW;rpl<br>D;rplC;rpsJ      | rpsJ | 3450981 | 20  |

|         |     |         |         |                                              |                                                |      |         |      |
|---------|-----|---------|---------|----------------------------------------------|------------------------------------------------|------|---------|------|
| TU-4177 | REV | 3451547 | 3452172 | 625 MU-2779                                  | 3451985 gspB                                   | gspB | 3451530 | 36   |
| TU-4178 | REV | 3451547 | 3453420 | 1873 MU-2779;MU-2780                         | gspB;gspA                                      | gspA | 3451951 |      |
| TU-4179 | REV | 3463847 | 3464747 | 900 MU-2781                                  | 3464770 bfr                                    | bfr  | 3464271 | 23   |
| TU-4180 | REV | 3464797 | 3464997 | 200 MU-2782                                  | 3465032 bfd                                    | bfd  | 3464819 | 19   |
| TU-4181 | REV | 3465297 | 3467372 | 2075 MU-2783                                 | chiA                                           | chiA | 3465182 |      |
| TU-4182 | REV | 3468172 | 3469522 | 1350 MU-2784                                 | 3469359 tufA                                   | tufA | 3468167 | 8    |
| TU-4183 | REV | 3468172 | 3469522 | 1350 MU-2784                                 | 3469402 tufA                                   | tufA | 3468167 | 51   |
| TU-4184 | REV | 3468172 | 3469522 | 1350 MU-2784                                 | 3469412 tufA                                   | tufA | 3468167 | 61   |
| TU-4185 | REV | 3468172 | 3469522 | 1350 MU-2784                                 | 3469419 tufA                                   | tufA | 3468167 | 68   |
| TU-4186 | REV | 3468172 | 3469522 | 1350 MU-2784                                 | 3469443 tufA                                   | tufA | 3468167 | 92   |
| TU-4187 | REV | 3469547 | 3472824 | 3277 MU-2785                                 | 3472640 fusA;rpsG;rpsL                         | rpsL | 3472200 | 66   |
| TU-4188 | REV | 3469547 | 3472824 | 3277 MU-2785                                 | 3472650 fusA;rpsG;rpsL                         | rpsL | 3472200 | 76   |
| TU-4189 | REV | 3472849 | 3474574 | 1725 MU-2786                                 | 3474466 yheL;yheM;yheN;yheO                    | yheO | 3473740 | 4    |
| TU-4190 | REV | 3472849 | 3474574 | 1725 MU-2786                                 | 3474524 yheL;yheM;yheN;yheO                    | yheO | 3473740 | 62   |
| TU-4191 | REV | 3472849 | 3474574 | 1725 MU-2786                                 | 3474563 yheL;yheM;yheN;yheO                    | yheO | 3473740 | 101  |
| TU-4192 | REV | 3474649 | 3475524 | 875 MU-2787                                  | 3475488 fkpA                                   | fkpA | 3474629 | 47   |
| TU-4193 | REV | 3474649 | 3475524 | 875 MU-2787                                  | 3475547 fkpA                                   | fkpA | 3474629 | 106  |
| TU-4194 | REV | 3475874 | 3476449 | 575 MU-2788                                  | 3476403 slyD                                   | slyD | 3475929 | -116 |
| TU-4195 | REV | 3475874 | 3476449 | 575 MU-2788                                  | 3476580 slyD                                   | slyD | 3475929 | 61   |
| TU-4196 | REV | 3476474 | 3479249 | 2775 MU-2789                                 | 3479273 yheV;kefB;kefG                         | kefG | 3478629 | 90   |
| TU-4197 | REV | 3483074 | 3483849 | 775 MU-2790                                  | 3483867 yhfA                                   | yhfA | 3483436 | 27   |
| TU-4198 | REV | 3483074 | 3483849 | 775 MU-2790                                  | 3483974 yhfA                                   | yhfA | 3483436 | 134  |
| TU-4199 | REV | 3486799 | 3488224 | 1425 MU-2791                                 | 3488232 argD                                   | argD | 3486982 | 30   |
| TU-4200 | REV | 3486799 | 3488224 | 1425 MU-2791                                 | 3488243 argD                                   | argD | 3486982 | 41   |
| TU-4201 | REV | 3488274 | 3489649 | 1375 MU-2792                                 | 3489670 pabA;fic;yhfG                          | yhfG | 3489475 | 28   |
| TU-4202 | REV | 3489774 | 3490424 | 650 MU-2793                                  | 3490351 ppiA                                   | ppiA | 3489747 | 32   |
| TU-4203 | REV | 3489774 | 3490424 | 650 MU-2793                                  | 3490357 ppiA                                   | ppiA | 3489747 | 38   |
| TU-4204 | REV | 3490474 | 3490624 | 150 MU-2794                                  | 3490712 NT                                     |      |         |      |
| TU-4205 | REV | 3502987 | 3510362 | 7375 MU-2795                                 | 3510372 yhfS;yhfT;yhfU;php;yhfW;yhfX;yhfY;yhfZ | yhfZ | 3509461 | 6    |
| TU-4206 | REV | 3502987 | 3510362 | 7375 MU-2795                                 | 3510389 yhfS;yhfT;yhfU;php;yhfW;yhfX;yhfY;yhfZ | yhfZ | 3509461 | 23   |
| TU-4207 | REV | 3510612 | 3511687 | 1075 MU-2796                                 | 3511720 trpS                                   | trpS | 3510656 | 60   |
| TU-4208 | REV | 3510612 | 3511687 | 1075 MU-2796                                 | 3511773 trpS                                   | trpS | 3510656 | 113  |
| TU-4209 | REV | 3510612 | 3513287 | 2675 MU-2796;MU-2797                         | 3513213 trpS;gph;rpe                           | rpe  | 3512404 | 132  |
| TU-4210 | REV | 3510612 | 3514137 | 3525 MU-2796;MU-2797;MU-2798                 | 3514323 trpS;gph;rpe;dam                       | dam  | 3513099 | 388  |
| TU-4211 | REV | 3510612 | 3515637 | 5025 MU-2796;MU-2797;MU-2798;MU-2799         | 3515537 trpS;gph;rpe;dam;damX                  | damX | 3514042 | 209  |
| TU-4212 | REV | 3510612 | 3517387 | 6775 MU-2796;MU-2797;MU-2798;MU-2799;MU-2800 | 3517188 trpS;gph;rpe;dam;damX;aroB;aroK        | aroK | 3516565 | 102  |
| TU-4213 | REV | 3510612 | 3517387 | 6775 MU-2796;MU-2797;MU-2798;MU-2799;MU-2800 | 3517403 trpS;gph;rpe;dam;damX;aroB;aroK        | aroK | 3516565 | 317  |
| TU-4214 | REV | 3517712 | 3520837 | 3125 MU-2801                                 | 3520825 hofQ;hofP;hofO;hofN;hofM               | hofM | 3519994 | 52   |
| TU-4215 | REV | 3523537 | 3524212 | 675 MU-2802                                  | 3524195 nudE                                   | nudE | 3523611 | 24   |
| TU-4216 | REV | 3523537 | 3524212 | 675 MU-2802                                  | 3524254 nudE                                   | nudE | 3523611 | 83   |
| TU-4217 | REV | 3523537 | 3524212 | 675 MU-2802                                  | 3524265 nudE                                   | nudE | 3523611 | 94   |
| TU-4218 | REV | 3528762 | 3530612 | 1850 MU-2803                                 | 3530485 yhgE                                   | yhgE | 3528737 | 24   |
| TU-4219 | REV | 3528762 | 3530612 | 1850 MU-2803                                 | 3530543 yhgE                                   | yhgE | 3528737 | 82   |

|         |     |         |         |                              |                                  |      |         |       |
|---------|-----|---------|---------|------------------------------|----------------------------------|------|---------|-------|
| TU-4220 | REV | 3532563 | 3534738 | 2175 MU-2804                 | 3534707 envZ;ompR                | ompR | 3533887 | 101   |
| TU-4221 | REV | 3532563 | 3534738 | 2175 MU-2804                 | 3534729 envZ;ompR                | ompR | 3533887 | 123   |
| TU-4222 | REV | 3532563 | 3534738 | 2175 MU-2804                 | 3534768 envZ;ompR                | ompR | 3533887 | 162   |
| TU-4223 | REV | 3537863 | 3538013 | 150 MU-2805                  | NT                               |      |         |       |
| TU-4224 | REV | 3537863 | 3538013 | 150 MU-2805                  | NT                               |      |         |       |
| TU-4225 | REV | 3542213 | 3542863 | 650 MU-2806                  | 3542897 bioH                     | bioH | 3542096 | 31    |
| TU-4226 | REV | 3546013 | 3550613 | 4600 MU-2807                 | 3550532 malQ;malP                | malP | 3548102 | 37    |
| TU-4227 | REV | 3553863 | 3556239 | 2376 MU-2808                 | 3556144 rtcA;rtcB                | rtcB | 3554875 | 43    |
| TU-4228 | REV | 3553863 | 3556239 | 2376 MU-2808                 | 3556160 rtcA;rtcB                | rtcB | 3554875 | 59    |
| TU-4229 | REV | 3553863 | 3556239 | 2376 MU-2808                 | 3556197 rtcA;rtcB                | rtcB | 3554875 | 96    |
| TU-4230 | REV | 3553863 | 3556239 | 2376 MU-2808                 | 3556202 rtcA;rtcB                | rtcB | 3554875 | 101   |
| TU-4231 | REV | 3557864 | 3558914 | 1050 MU-2809                 | 3558752 glpR                     | glpR | 3557870 | 124   |
| TU-4232 | REV | 3557864 | 3558914 | 1050 MU-2809                 | 3558903 glpR                     | glpR | 3557870 | 275   |
| TU-4233 | REV | 3557864 | 3559889 | 2025 MU-2809;MU-2810         | 3559883 glpR;glpG;glpE           | glpE | 3559520 | 37    |
| TU-4234 | REV | 3561489 | 3561989 | 500 MU-2811                  | yzgL                             | yzgL | 3561747 |       |
| TU-4235 | REV | 3562089 | 3566522 | 4433 MU-2812                 | 3566419 glgP;glgA                | glgA | 3564623 | 363   |
| TU-4236 | REV | 3562089 | 3567522 | 5433 MU-2812;MU-2813         | 3567411 glgP;glgA;glgC           | glgC | 3566056 | 60    |
| TU-4237 | REV | 3562089 | 3567522 | 5433 MU-2812;MU-2813         | 3567480 glgP;glgA;glgC           | glgC | 3566056 | 129   |
| TU-4238 | REV | 3562089 | 3567522 | 5433 MU-2812;MU-2813         | 3567595 glgP;glgA;glgC           | glgC | 3566056 | 244   |
| TU-4239 | REV | 3562089 | 3571622 | 9533 MU-2812;MU-2813;MU-2814 | 3571644 glgP;glgA;glgC;glgX;glgB | glgB | 3569339 | 119   |
| TU-4240 | REV | 3562089 | 3571622 | 9533 MU-2812;MU-2813;MU-2814 | 3571787 glgP;glgA;glgC;glgX;glgB | glgB | 3569339 | 262   |
| TU-4241 | REV | 3562089 | 3571622 | 9533 MU-2812;MU-2813;MU-2814 | 3571792 glgP;glgA;glgC;glgX;glgB | glgB | 3569339 | 267   |
| TU-4242 | REV | 3571647 | 3572997 | 1350 MU-2815                 | 3572903 asd                      | asd  | 3571798 | 2     |
| TU-4243 | REV | 3574147 | 3575622 | 1475 MU-2816                 | 3574307 gntU;gntK                | gntK | 3575088 | -1308 |
| TU-4244 | REV | 3575697 | 3576922 | 1225 MU-2817                 | 3576961 gntR                     | gntR | 3575754 | 212   |
| TU-4245 | REV | 3577022 | 3578897 | 1875 MU-2818                 | 3578831 yhhW;yhhX                | yhhX | 3577791 | 3     |
| TU-4246 | REV | 3577022 | 3578897 | 1875 MU-2818                 | 3578852 yhhW;yhhX                | yhhX | 3577791 | 24    |
| TU-4247 | REV | 3578972 | 3579022 | 50 MU-2819                   | 3579039 ryhB                     | ryhB | 3578950 | 0     |
| TU-4248 | REV | 3581495 | 3582320 | 825 MU-2820                  | 3582323 NT                       |      |         |       |
| TU-4249 | REV | 3583195 | 3584845 | 1650 MU-2821                 | 3584877 ggt                      | ggt  | 3583104 | 31    |
| TU-4250 | REV | 3583195 | 3584845 | 1650 MU-2821                 | 3585024 ggt                      | ggt  | 3583104 | 178   |
| TU-4251 | REV | 3585520 | 3590420 | 4900 MU-2822                 | 3590437 ugpQ;ugpC;ugpE;ugpA;ugpB | ugpB | 3589032 | 89    |
| TU-4252 | REV | 3585520 | 3590420 | 4900 MU-2822                 | 3590449 ugpQ;ugpC;ugpE;ugpA;ugpB | ugpB | 3589032 | 101   |
| TU-4253 | REV | 3590520 | 3595749 | 5229 MU-2823                 | 3595627 livF;livG;livM;livH;livK | livK | 3594474 | 44    |
| TU-4254 | REV | 3590520 | 3595749 | 5229 MU-2823                 | 3595638 livF;livG;livM;livH;livK | livK | 3594474 | 55    |
| TU-4255 | REV | 3590520 | 3595749 | 5229 MU-2823                 | 3595744 livF;livG;livM;livH;livK | livK | 3594474 | 161   |
| TU-4256 | REV | 3590520 | 3595749 | 5229 MU-2823                 | 3595769 livF;livG;livM;livH;livK | livK | 3594474 | 186   |
| TU-4257 | REV | 3596274 | 3597774 | 1500 MU-2824                 | 3597715 livJ                     | livJ | 3596578 | 34    |
| TU-4258 | REV | 3596274 | 3597774 | 1500 MU-2824                 | 3597785 livJ                     | livJ | 3596578 | 104   |
| TU-4259 | REV | 3597949 | 3599049 | 1100 MU-2825                 | 3598820 rpoH                     | rpoH | 3597952 | 14    |
| TU-4260 | REV | 3597949 | 3599049 | 1100 MU-2825                 | 3598872 rpoH                     | rpoH | 3597952 | 66    |
| TU-4261 | REV | 3597949 | 3599049 | 1100 MU-2825                 | 3598886 rpoH                     | rpoH | 3597952 | 80    |
| TU-4262 | REV | 3597949 | 3599049 | 1100 MU-2825                 | 3598893 rpoH                     | rpoH | 3597952 | 87    |
| TU-4263 | REV | 3597949 | 3599049 | 1100 MU-2825                 | 3599027 rpoH                     | rpoH | 3597952 | 221   |
| TU-4264 | REV | 3597949 | 3599049 | 1100 MU-2825                 | 3599187 rpoH                     | rpoH | 3597952 | 381   |
| TU-4265 | REV | 3599099 | 3602349 | 3250 MU-2826                 | 3602333 ftsX;ftsE;ftsY           | ftsY | 3600773 | 67    |

|         |     |         |         |               |         |                               |      |         |     |
|---------|-----|---------|---------|---------------|---------|-------------------------------|------|---------|-----|
| TU-4266 | REV | 3599099 | 3602349 | 3250 MU-2826  | 3602339 | ftsX;ftsE;ftsY                | ftsY | 3600773 | 73  |
| TU-4267 | REV | 3602974 | 3603624 | 650 MU-2827   |         | yhhM                          | yhhM | 3603274 |     |
| TU-4268 | REV | 3606649 | 3607224 | 575 MU-2828   | 3607043 | sirA                          | sirA | 3606774 | 24  |
| TU-4269 | REV | 3608574 | 3609749 | 1175 MU-2829  | 3609782 | yhhS                          | yhhS | 3608539 | 26  |
| TU-4270 | REV | 3616824 | 3617149 | 325 MU-2830   | 3617170 | NT                            |      |         |     |
| TU-4271 | REV | 3616824 | 3617149 | 325 MU-2830   | 3617187 | NT                            |      |         |     |
| TU-4272 | REV | 3623349 | 3628924 | 5575 MU-2831  | 3628862 | yhhJ;rbbA;yhiI                | yhiI | 3627558 | 237 |
| TU-4273 | REV | 3623349 | 3628924 | 5575 MU-2831  | 3628952 | yhhJ;rbbA;yhiI                | yhiI | 3627558 | 327 |
| TU-4274 | REV | 3628991 | 3630613 | 1622 MU-2832  |         | yhiJ                          | yhiJ | 3628991 |     |
| TU-4275 | REV | 3630875 | 3632481 | 1606 MU-2833  |         | yhiL                          | yhiL | 3630875 |     |
| TU-4276 | REV | 3633674 | 3635499 | 1825 MU-2834  | 3635522 | yhiN                          | yhiN | 3634231 | 89  |
| TU-4277 | REV | 3636999 | 3637849 | 850 MU-2835   | 3637869 | uspB                          | uspB | 3637408 | 126 |
| TU-4278 | REV | 3638649 | 3638699 | 50 MU-2836    | 3638759 | NT                            |      |         |     |
| TU-4279 | REV | 3640374 | 3643249 | 2875 MU-2837  | 3643224 | yhiQ;prlC                     | prlC | 3641163 | 19  |
| TU-4280 | REV | 3640374 | 3643249 | 2875 MU-2837  | 3643261 | yhiQ;prlC                     | prlC | 3641163 | 56  |
| TU-4281 | REV | 3640374 | 3643249 | 2875 MU-2837  | 3643272 | yhiQ;prlC                     | prlC | 3641163 | 67  |
| TU-4282 | REV | 3645749 | 3645974 | 225 MU-2838   | 3646005 | dinQ                          | dinQ | 3645728 | 149 |
| TU-4283 | REV | 3647235 | 3647935 | 700 MU-2839   |         | NT                            |      |         |     |
| TU-4284 | REV | 3650060 | 3651235 | 1175 MU-2840  | 3651291 | insH                          | insH | 3650205 | 70  |
| TU-4285 | REV | 3650060 | 3651235 | 1175 MU-2840  | 3651336 | insH                          | insH | 3650205 | 115 |
| TU-4286 | REV | 3652960 | 3654810 | 1850 MU-2841  | 3654784 | yhiD;hdeB;hdeA                | hdeA | 3654431 | 21  |
| TU-4287 | REV | 3652960 | 3654810 | 1850 MU-2841  | 3654793 | yhiD;hdeB;hdeA                | hdeA | 3654431 | 30  |
| TU-4288 | REV | 3652960 | 3654810 | 1850 MU-2841  | 3654803 | yhiD;hdeB;hdeA                | hdeA | 3654431 | 40  |
| TU-4289 | REV | 3652960 | 3654810 | 1850 MU-2841  | 3654807 | yhiD;hdeB;hdeA                | hdeA | 3654431 | 44  |
| TU-4290 | REV | 3652960 | 3654810 | 1850 MU-2841  | 3654814 | yhiD;hdeB;hdeA                | hdeA | 3654431 | 51  |
| TU-4291 | REV | 3655860 | 3656035 | 175 MU-2842   | 3656051 | NT                            |      |         |     |
| TU-4292 | REV | 3655860 | 3656035 | 175 MU-2842   | 3656077 | NT                            |      |         |     |
| TU-4293 | REV | 3661935 | 3662860 | 925 MU-2843   | 3662689 | gadW                          | gadW | 3661913 | 48  |
| TU-4294 | REV | 3662885 | 3663835 | 950 MU-2844   | 3663855 | gadX                          | gadX | 3663009 | 22  |
| TU-4295 | REV | 3662885 | 3663835 | 950 MU-2844   | 3663864 | gadX                          | gadX | 3663009 | 31  |
| TU-4296 | REV | 3663960 | 3665610 | 1650 MU-2845  | 3665631 | gadA                          | gadA | 3664203 | 28  |
| TU-4297 | REV | 3666010 | 3667260 | 1250 MU-2846  | 3667288 | yhjA                          | yhjA | 3665814 | 77  |
| TU-4298 | REV | 3669315 | 3669917 | 602 MU-2847   |         | yhjB                          | yhjB | 3669315 |     |
| TU-4299 | REV | 3674315 | 3676390 | 2075 MU-2848  | 3676403 | yhjG                          | yhjG | 3674313 | 15  |
| TU-4300 | REV | 3676740 | 3677090 | 350 MU-2849   | 3677219 | yhjH                          | yhjH | 3676443 | 9   |
| TU-4301 | REV | 3676740 | 3677090 | 350 MU-2849   | 3677250 | yhjH                          | yhjH | 3676443 | 40  |
| TU-4302 | REV | 3678490 | 3679915 | 1425 MU-2850  | 3680034 | yhjJ                          | yhjJ | 3678467 | 71  |
| TU-4303 | REV | 3679940 | 3681565 | 1625 MU-2851  | 3681519 | dctA                          | dctA | 3680184 | 49  |
| TU-4304 | REV | 3679940 | 3681565 | 1625 MU-2851  | 3681683 | dctA                          | dctA | 3680184 | 213 |
| TU-4305 | REV | 3681690 | 3684065 | 2375 MU-2852  | 3684213 | yhjK                          | yhjK | 3681653 | 605 |
| TU-4306 | REV | 3681690 | 3684065 | 2375 MU-2852  | 3684223 | yhjK                          | yhjK | 3681653 | 615 |
| TU-4307 | REV | 3684090 | 3694391 | 10301 MU-2853 | 3694252 | bcsC;bcsZ;bcsB;bcsA;yhjQ;yhjR | yhjR | 3694020 | 44  |
| TU-4308 | REV | 3684090 | 3694391 | 10301 MU-2853 | 3694337 | bcsC;bcsZ;bcsB;bcsA;yhjQ;yhjR | yhjR | 3694020 | 129 |
| TU-4309 | REV | 3684090 | 3694391 | 10301 MU-2853 | 3694346 | bcsC;bcsZ;bcsB;bcsA;yhjQ;yhjR | yhjR | 3694020 | 138 |
| TU-4310 | REV | 3684090 | 3694391 | 10301 MU-2853 | 3694361 | bcsC;bcsZ;bcsB;bcsA;yhjQ;yhjR | yhjR | 3694020 | 153 |
| TU-4311 | REV | 3684090 | 3694391 | 10301 MU-2853 | 3694387 | bcsC;bcsZ;bcsB;bcsA;yhjQ;yhjR | yhjR | 3694020 | 179 |

|         |     |         |         |                              |                                  |      |         |      |
|---------|-----|---------|---------|------------------------------|----------------------------------|------|---------|------|
| TU-4312 | REV | 3697966 | 3698266 | 300 MU-2854                  | 3698295 ldrD                     | ldrD | 3698003 | 185  |
| TU-4313 | REV | 3698516 | 3698566 | 50 MU-2855                   | 3698620 NT                       |      |         |      |
| TU-4314 | REV | 3699066 | 3705869 | 6803 MU-2856                 | 3705731 dppF;dppD;dppC;dppB;dppA | dppA | 3704121 | 3    |
| TU-4315 | REV | 3699066 | 3705869 | 6803 MU-2856                 | 3705750 dppF;dppD;dppC;dppB;dppA | dppA | 3704121 | 22   |
| TU-4316 | REV | 3699066 | 3705869 | 6803 MU-2856                 | 3705826 dppF;dppD;dppC;dppB;dppA | dppA | 3704121 | 98   |
| TU-4317 | REV | 3699066 | 3705869 | 6803 MU-2856                 | 3705893 dppF;dppD;dppC;dppB;dppA | dppA | 3704121 | 165  |
| TU-4318 | REV | 3706619 | 3706694 | 75 MU-2857                   | 3706715 proK                     | proK | 3706639 | 0    |
| TU-4319 | REV | 3706844 | 3708569 | 1725 MU-2858                 | 3708608 eptB                     | eptB | 3706807 | 110  |
| TU-4320 | REV | 3708822 | 3710030 | 1208 MU-2859                 | yhjX                             | yhjX | 3708822 |      |
| TU-4321 | REV | 3710269 | 3711019 | 750 MU-2860                  | 3711033 yhjY                     | yhjY | 3710259 | 76   |
| TU-4322 | REV | 3712019 | 3714494 | 2475 MU-2861                 | 3714451 bisC                     | bisC | 3712084 | 34   |
| TU-4323 | REV | 3712019 | 3714494 | 2475 MU-2861                 | 3714580 bisC                     | bisC | 3712084 | 163  |
| TU-4324 | REV | 3716369 | 3717094 | 725 MU-2862                  | yaF                              | yaF  | 3716357 |      |
| TU-4325 | REV | 3718471 | 3718655 | 184 MU-2863                  | hokA;mokA                        | mokA | 3718471 |      |
| TU-4326 | REV | 3720069 | 3723369 | 3300 MU-2864                 | 3723377 glyS;glyQ                | glyQ | 3722430 | 36   |
| TU-4327 | REV | 3723544 | 3723844 | 300 MU-2865                  | 3723815 ysaB                     | ysaB | 3723436 | 80   |
| TU-4328 | REV | 3724947 | 3725771 | 824 MU-2866                  | yaA;yaB                          | yaB  | 3725430 |      |
| TU-4329 | REV | 3725994 | 3728669 | 2675 MU-2867                 | 3728830 xylB;xylA                | xylA | 3727466 | 42   |
| TU-4330 | REV | 3730496 | 3730821 | 325 MU-2868                  | 3730755 NT                       |      |         |      |
| TU-4331 | REV | 3734246 | 3735276 | 1030 MU-2869                 | 3735265 bax                      | bax  | 3734376 | 65   |
| TU-4332 | REV | 3739226 | 3740526 | 1300 MU-2870                 | 3740563 ysaA;yaJ                 | yaJ  | 3739707 | 8    |
| TU-4333 | REV | 3748851 | 3749076 | 225 MU-2871                  | 3749066 ysaC                     | ysaC | 3748836 | 129  |
| TU-4334 | REV | 3749251 | 3749726 | 475 MU-2872                  | 3749762 yaT                      | yaT  | 3749151 | -129 |
| TU-4335 | REV | 3750986 | 3752451 | 1465 MU-2873                 | yaV;yaW                          | yaW  | 3752128 |      |
| TU-4336 | REV | 3752876 | 3754526 | 1650 MU-2874                 | 3754558 aldB                     | aldB | 3752996 | 24   |
| TU-4337 | REV | 3752876 | 3754526 | 1650 MU-2874                 | 3754659 aldB                     | aldB | 3752996 | 125  |
| TU-4338 | REV | 3754699 | 3755850 | 1151 MU-2875                 | yaY                              | yaY  | 3754699 |      |
| TU-4339 | REV | 3756127 | 3759277 | 3150 MU-2876                 | 3759323 selB;selA                | selA | 3757881 | 51   |
| TU-4340 | REV | 3759327 | 3759977 | 650 MU-2877                  | 3760004 yibF                     | yibF | 3759370 | 26   |
| TU-4341 | REV | 3763852 | 3764077 | 225 MU-2878                  | 3764114 NT                       |      |         |      |
| TU-4342 | REV | 3765602 | 3765677 | 75 MU-2879                   | 3765702 NT                       |      |         |      |
| TU-4343 | REV | 3768477 | 3769802 | 1325 MU-2880                 | yibH;yibI                        | yibI | 3769405 |      |
| TU-4344 | REV | 3773827 | 3774627 | 800 MU-2881                  | 3774469 yibT                     | yibT | 3774194 | 66   |
| TU-4345 | REV | 3779677 | 3780602 | 925 MU-2882                  | 3780704 cysE                     | cysE | 3779764 | 119  |
| TU-4346 | REV | 3780627 | 3782177 | 1550 MU-2883                 | 3782183 gpsA;secB                | secB | 3781684 | 32   |
| TU-4347 | REV | 3780627 | 3782577 | 1950 MU-2883;MU-2884         | 3782529 gpsA;secB;grxC           | grxC | 3782214 | 64   |
| TU-4348 | REV | 3782602 | 3783052 | 450 MU-2885                  | 3783077 yibN                     | yibN | 3782607 | 39   |
| TU-4349 | REV | 3787070 | 3788104 | 1034 MU-2886                 | yibD                             | yibD | 3787070 |      |
| TU-4350 | REV | 3788352 | 3790602 | 2250 MU-2887                 | 3790746 tdh;kbl                  | kbl  | 3789378 | 172  |
| TU-4351 | REV | 3790827 | 3791802 | 975 MU-2888                  | 3791734 htrL                     | htrL | 3790849 | 28   |
| TU-4352 | REV | 3794877 | 3797027 | 2150 MU-2889                 | 3796838 waaU                     | waaU | 3796262 | -497 |
| TU-4353 | REV | 3794877 | 3799054 | 4177 MU-2889;MU-2890         | 3799018 waaU;rfaZ;rfaY           | rfaY | 3798290 | 30   |
| TU-4354 | REV | 3794877 | 3799054 | 4177 MU-2889;MU-2890         | 3799105 waaU;rfaZ;rfaY           | rfaY | 3798290 | 117  |
| TU-4355 | REV | 3794877 | 3799054 | 4177 MU-2889;MU-2890         | 3799236 waaU;rfaZ;rfaY           | rfaY | 3798290 | 248  |
| TU-4356 | REV | 3794877 | 3800404 | 5527 MU-2889;MU-2890;MU-2891 | 3800527 waaU;rfaZ;rfaY;rfaJ      | rfaJ | 3799006 | 505  |
| TU-4357 | REV | 3794877 | 3800404 | 5527 MU-2889;MU-2890;MU-2891 | 3800542 waaU;rfaZ;rfaY;rfaJ      | rfaJ | 3799006 | 520  |



|         |     |         |         |                                                               |                                                           |      |         |      |
|---------|-----|---------|---------|---------------------------------------------------------------|-----------------------------------------------------------|------|---------|------|
| TU-4358 | REV | 3794877 | 3802454 | 7577 MU-2889;MU-2890;MU-2891;MU-2892                          | 3802583 waaU;rfaZ;rfaY;rfaJ;rfaI;rfaB                     | rfaB | 3801081 | 393  |
| TU-4359 | REV | 3794877 | 3803756 | 8879 MU-2889;MU-2890;MU-2891;MU-2892;MU-2893                  | 3803796 waaU;rfaZ;rfaY;rfaJ;rfaI;rfaB;rfaS;rfaP           | rfaP | 3803176 | -177 |
| TU-4360 | REV | 3794877 | 3804856 | 9979 MU-2889;MU-2890;MU-2891;MU-2892;MU-2893;MU-2894          | 3804755 waaU;rfaZ;rfaY;rfaJ;rfaI;rfaB;rfaS;rfaP;rfaG      | rfaG | 3803966 | -335 |
| TU-4361 | REV | 3794877 | 3806281 | 11404 MU-2889;MU-2890;MU-2891;MU-2892;MU-2893;MU-2894;MU-2895 | 3806260 waaU;rfaZ;rfaY;rfaJ;rfaI;rfaB;rfaS;rfaP;rfaG;rfaQ | rfaQ | 3805087 | 139  |
| TU-4362 | REV | 3808206 | 3809181 | 975 MU-2896                                                   | 3809198 mutM                                              | mutM | 3808366 | 23   |
| TU-4363 | REV | 3809281 | 3810006 | 725 MU-2897                                                   | 3809827 rpmG;rpmB                                         | rpmB | 3809461 | 130  |
| TU-4364 | REV | 3809281 | 3810006 | 725 MU-2897                                                   | 3809987 rpmG;rpmB                                         | rpmB | 3809461 | 290  |
| TU-4365 | REV | 3809914 | 3810582 | 668 MU-2898                                                   | yicR                                                      | yicR | 3809914 |      |
| TU-4366 | REV | 3813456 | 3814581 | 1125 MU-2899                                                  | 3814579 pyrE;rph                                          | rph  | 3813886 | 7    |
| TU-4367 | REV | 3817511 | 3819193 | 1682 MU-2900                                                  | ligB                                                      | ligB | 3817511 |      |
| TU-4368 | REV | 3825231 | 3826856 | 1625 MU-2901                                                  | 3826724 gltS                                              | gltS | 3825483 | 36   |
| TU-4369 | REV | 3825231 | 3826856 | 1625 MU-2901                                                  | 3826788 gltS                                              | gltS | 3825483 | 100  |
| TU-4370 | REV | 3830242 | 3833952 | 3710 MU-2902                                                  | yicI;yicJ                                                 | yicJ | 3832570 |      |
| TU-4371 | REV | 3836631 | 3838081 | 1450 MU-2903                                                  | 3838039 nlpA                                              | nlpA | 3837198 | 23   |
| TU-4372 | REV | 3838572 | 3839762 | 1190 MU-2904                                                  | 3839794 nepI                                              | nepI | 3838572 | 32   |
| TU-4373 | REV | 3839973 | 3841812 | 1839 MU-2905                                                  | yicN;yicO                                                 | yicO | 3840478 |      |
| TU-4374 | REV | 3843806 | 3843981 | 175 MU-2906                                                   | NT                                                        |      |         |      |
| TU-4375 | REV | 3843799 | 3845190 | 1391 MU-2907                                                  | uhpT                                                      | uhpT | 3843799 |      |
| TU-4376 | REV | 3845306 | 3850806 | 5500 MU-2908                                                  | 3850893 uhpC;uhpB;uhpA;ilvN;ilvB                          | ilvB | 3849119 | 86   |
| TU-4377 | REV | 3850831 | 3851033 | 202 MU-2909                                                   | 3851039 ivbL                                              | ivbL | 3850913 | 28   |
| TU-4378 | REV | 3851141 | 3851280 | 139 MU-2910                                                   | 3851215 istR                                              | istR | 3851141 | -65  |
| TU-4379 | REV | 3851141 | 3851280 | 139 MU-2910                                                   | 3851280 istR                                              | istR | 3851141 | 0    |
| TU-4380 | REV | 3853608 | 3854408 | 800 MU-2911                                                   | 3854408 yidF;yidG;yidH                                    | yidH | 3853983 | 78   |
| TU-4381 | REV | 3853608 | 3854408 | 800 MU-2911                                                   | 3854437 yidF;yidG;yidH                                    | yidH | 3853983 | 107  |
| TU-4382 | REV | 3854934 | 3858139 | 3205 MU-2912                                                  | yidJ;yidK                                                 | yidK | 3856424 |      |
| TU-4383 | REV | 3859196 | 3861626 | 2430 MU-2913                                                  | glvG;glvC                                                 | glvC | 3860010 |      |
| TU-4384 | REV | 3862658 | 3864333 | 1675 MU-2914                                                  | yidE                                                      | yidE | 3862635 |      |
| TU-4385 | REV | 3864483 | 3865008 | 525 MU-2915                                                   | 3865000 ibpB                                              | ibpB | 3864492 | 80   |
| TU-4386 | REV | 3864483 | 3865008 | 525 MU-2915                                                   | 3865032 ibpB                                              | ibpB | 3864492 | 112  |
| TU-4387 | REV | 3864483 | 3865708 | 1225 MU-2915;MU-2916                                          | 3865541 ibpB;ibpA                                         | ibpA | 3865032 | 96   |
| TU-4388 | REV | 3866508 | 3867283 | 775 MU-2917                                                   | 3867318 yidR                                              | yidR | 3866085 | 19   |
| TU-4389 | REV | 3870268 | 3873318 | 3050 MU-2918                                                  | 3873209 dgoT;dgoD;dgoA;dgoK;dgoR                          | dgoR | 3872494 | 26   |
| TU-4390 | REV | 3874168 | 3874968 | 800 MU-2919                                                   | 3875000 yidA                                              | yidA | 3874163 | 25   |
| TU-4391 | REV | 3874168 | 3875493 | 1325 MU-2919;MU-2920                                          | 3875526 yidA;yidB                                         | yidB | 3875090 | 38   |
| TU-4392 | REV | 3875618 | 3878271 | 2653 MU-2921                                                  | 3878175 gyrB                                              | gyrB | 3875728 | 33   |
| TU-4393 | REV | 3878296 | 3879721 | 1425 MU-2922                                                  | 3879914 recF                                              | recF | 3878171 | 670  |
| TU-4394 | REV | 3879746 | 3881971 | 2225 MU-2923                                                  | 3881901 dnaN;dnaA                                         | dnaA | 3880349 | 149  |
| TU-4395 | REV | 3891497 | 3891822 | 325 MU-2924                                                   | 3891867 NT                                                |      |         |      |
| TU-4396 | REV | 3893297 | 3894647 | 1350 MU-2925                                                  | 3894662 yieG                                              | yieG | 3893295 | 30   |
| TU-4397 | REV | 3896694 | 3898600 | 1906 MU-2926                                                  | yieK;yieL                                                 | yieL | 3897431 |      |
| TU-4398 | REV | 3896694 | 3900243 | 3549 MU-2927                                                  | yieK;yieL;bglH                                            | bglH | 3898627 |      |
| TU-4399 | REV | 3900312 | 3904590 | 4278 MU-2928                                                  | bglB;bglF;bglG                                            | bglG | 3903754 |      |

|         |     |         |         |                      |                                                          |      |         |     |
|---------|-----|---------|---------|----------------------|----------------------------------------------------------|------|---------|-----|
| TU-4400 | REV | 3904873 | 3909582 | 4709 MU-2929         | 3909724 phoU;pstB;pstA;pstC;pstS                         | pstS | 3908508 | 176 |
| TU-4401 | REV | 3909882 | 3913357 | 3475 MU-2930         | 3913244 glmS;glmU                                        | glmU | 3911853 | 21  |
| TU-4402 | REV | 3909882 | 3913357 | 3475 MU-2930         | 3913348 glmS;glmU                                        | glmU | 3911853 | 125 |
| TU-4403 | REV | 3913582 | 3920707 | 7125 MU-2931         | 3920513 atpC;atpD;atpG;atpA;atpH;atpF;atpE;atpB;a<br>tpI | atpI | 3920083 | 50  |
| TU-4404 | REV | 3921007 | 3923732 | 2725 MU-2932         | 3923686 gidB;mnmG                                        | mnmG | 3921767 | 30  |
| TU-4405 | REV | 3921007 | 3923732 | 2725 MU-2932         | 3923702 gidB;mnmG                                        | mnmG | 3921767 | 46  |
| TU-4406 | REV | 3923807 | 3924532 | 725 MU-2933          | 3924499 mioC                                             | mioC | 3924035 | 21  |
| TU-4407 | REV | 3924632 | 3925007 | 375 MU-2934          | 3925053 asnC                                             | asnC | 3924568 | 27  |
| TU-4408 | REV | 3926132 | 3927682 | 1550 MU-2935         | 3927702 viaA                                             | viaA | 3926175 | 76  |
| TU-4409 | REV | 3926132 | 3927682 | 1550 MU-2935         | 3927781 viaA                                             | viaA | 3926175 | 155 |
| TU-4410 | REV | 3926132 | 3929157 | 3025 MU-2935;MU-2936 | 3929153 viaA;ravA                                        | ravA | 3927620 | 37  |
| TU-4411 | REV | 3938057 | 3939432 | 1375 MU-2937         | 3939377 hsrA;yieP                                        | yieP | 3938658 | 27  |
| TU-4412 | REV | 3945088 | 3946063 | 975 MU-2938          | 3946015 hdfR                                             | hdfR | 3945151 | 25  |
| TU-4413 | REV | 3946472 | 3947992 | 1520 MU-2939         | yifB                                                     | yifB | 3946472 |     |
| TU-4414 | REV | 3954632 | 3955961 | 1329 MU-2940         | 3955895 ilvY                                             | ilvY | 3954950 | 52  |
| TU-4415 | REV | 3957586 | 3957911 | 325 MU-2941          | 3957862 ppiC                                             | ppiC | 3957555 | 26  |
| TU-4416 | REV | 3958036 | 3958486 | 450 MU-2942          | 3958493 yifN                                             | yifN | 3958035 | 10  |
| TU-4417 | REV | 3960761 | 3963736 | 2975 MU-2943         | 3963691 gpp;rhIB                                         | rhIB | 3962388 | 38  |
| TU-4418 | REV | 3982537 | 3983937 | 1400 MU-2944         | 3984114 aslA                                             | aslA | 3982375 | 84  |
| TU-4419 | REV | 3984737 | 3987412 | 2675 MU-2945         | 3987236 hemY;hemX                                        | hemX | 3985908 | 147 |
| TU-4420 | REV | 3984737 | 3987412 | 2675 MU-2945         | 3987493 hemY;hemX                                        | hemX | 3985908 | 404 |
| TU-4421 | REV | 3984737 | 3988937 | 4200 MU-2945;MU-2946 | 3988812 hemY;hemX;hemD;hemC                              | hemC | 3987848 | 23  |
| TU-4422 | REV | 3991490 | 3992115 | 625 MU-2947          | 3992106 cyaY                                             | cyaY | 3991762 | 24  |
| TU-4423 | REV | 3998315 | 3999079 | 764 MU-2948          | yigE                                                     | yigE | 3998315 |     |
| TU-4424 | REV | 4000442 | 4001216 | 774 MU-2949          | yigF;yigG                                                | yigG | 4000836 |     |
| TU-4425 | REV | 4001315 | 4002715 | 1400 MU-2950         | 4002748 rarD;yigI                                        | yigI | 4002253 | 28  |
| TU-4426 | REV | 4006340 | 4007065 | 725 MU-2951          | 4007109 rhtB                                             | rhtB | 4006462 | 27  |
| TU-4427 | REV | 4009240 | 4010940 | 1700 MU-2952         | 4010878 metR                                             | metR | 4009886 | 39  |
| TU-4428 | REV | 4013290 | 4014340 | 1050 MU-2953         | 4014216 ysgA                                             | ysgA | 4013377 | 24  |
| TU-4429 | REV | 4022365 | 4023065 | 700 MU-2954          | 4022866 rfaH                                             | rfaH | 4022356 | 22  |
| TU-4430 | REV | 4025315 | 4029017 | 3702 MU-2955         | 4029036 fadA;fadB                                        | fadB | 4026805 | 42  |
| TU-4431 | REV | 4038920 | 4040120 | 1200 MU-2956         | 4040165 mobB;mobA                                        | mobA | 4039438 | 143 |
| TU-4432 | REV | 4043881 | 4044581 | 700 MU-2957          | 4044649 yihG                                             | yihG | 4043693 | 24  |
| TU-4433 | REV | 4048056 | 4048806 | 750 MU-2958          | 4048811 yihA                                             | yihA | 4048156 | 23  |
| TU-4434 | REV | 4048056 | 4048806 | 750 MU-2958          | 4048817 yihA                                             | yihA | 4048156 | 29  |
| TU-4435 | REV | 4051406 | 4051831 | 425 MU-2959          | 4051800 NT                                               |      |         |     |
| TU-4436 | REV | 4051881 | 4054356 | 2475 MU-2960         | glnG;glnL                                                | glnL | 4053313 |     |
| TU-4437 | REV | 4051881 | 4056206 | 4325 MU-2960;MU-2961 | 4056075 glnG;glnL;glnA                                   | glnA | 4054648 | 18  |
| TU-4438 | REV | 4051881 | 4056206 | 4325 MU-2960;MU-2961 | 4056101 glnG;glnL;glnA                                   | glnA | 4054648 | 44  |
| TU-4439 | REV | 4051881 | 4056206 | 4325 MU-2960;MU-2961 | 4056109 glnG;glnL;glnA                                   | glnA | 4054648 | 52  |
| TU-4440 | REV | 4051881 | 4056206 | 4325 MU-2960;MU-2961 | 4056129 glnG;glnL;glnA                                   | glnA | 4054648 | 72  |
| TU-4441 | REV | 4061626 | 4062318 | 692 MU-2962          | ompL                                                     | ompL | 4061626 |     |
| TU-4442 | REV | 4062386 | 4067299 | 4913 MU-2963         | yihO;yihP;yihQ                                           | yihQ | 4065263 |     |
| TU-4443 | REV | 4067498 | 4068424 | 926 MU-2964          | yihR                                                     | yihR | 4067498 |     |
| TU-4444 | REV | 4068538 | 4071594 | 3056 MU-2965         | yihS;yihT;yihU                                           | yihU | 4070698 |     |

|         |     |         |         |                      |                                       |      |         |     |
|---------|-----|---------|---------|----------------------|---------------------------------------|------|---------|-----|
| TU-4445 | REV | 4078433 | 4079383 | 950 MU-2966          | 4079332 fdhE                          | fdhE | 4078322 | 81  |
| TU-4446 | REV | 4078433 | 4079383 | 950 MU-2966          | 4079351 fdhE                          | fdhE | 4078322 | 100 |
| TU-4447 | REV | 4078433 | 4079383 | 950 MU-2966          | 4079384 fdhE                          | fdhE | 4078322 | 133 |
| TU-4448 | REV | 4079433 | 4083958 | 4525 MU-2967         | 4083953 fdoI;fdoH;fdoG                | fdoG | 4080795 | 108 |
| TU-4449 | REV | 4079433 | 4083958 | 4525 MU-2967         | 4083987 fdoI;fdoH;fdoG                | fdoG | 4080795 | 142 |
| TU-4450 | REV | 4086130 | 4090846 | 4716 MU-2968         | frvR;frvX;frvB;frvA                   | frvA | 4090400 |     |
| TU-4451 | REV | 4091147 | 4095471 | 4324 MU-2969         | rhaM;rhaD;rhaA;rhaB                   | rhaB | 4094002 |     |
| TU-4452 | REV | 4096970 | 4098720 | 1750 MU-2970         | 4098605 rhaT                          | rhaT | 4097514 | 57  |
| TU-4453 | REV | 4096970 | 4098720 | 1750 MU-2970         | 4098760 rhaT                          | rhaT | 4097514 | 212 |
| TU-4454 | REV | 4100395 | 4100770 | 375 MU-2971          | 4100760 NT                            |      |         |     |
| TU-4455 | REV | 4101570 | 4104045 | 2475 MU-2972         | 4103708 cpxA;cpxR                     | cpxR | 4102995 | 15  |
| TU-4456 | REV | 4101570 | 4104045 | 2475 MU-2972         | 4103751 cpxA;cpxR                     | cpxR | 4102995 | 58  |
| TU-4457 | REV | 4108798 | 4109698 | 900 MU-2973          | 4109564 tpiA                          | tpiA | 4108763 | 34  |
| TU-4458 | REV | 4108798 | 4109698 | 900 MU-2973          | 4109592 tpiA                          | tpiA | 4108763 | 62  |
| TU-4459 | REV | 4108798 | 4109698 | 900 MU-2973          | 4109598 tpiA                          | tpiA | 4108763 | 68  |
| TU-4460 | REV | 4109748 | 4110223 | 475 MU-2974          | 4110260 yiiQ                          | yiiQ | 4109638 | 23  |
| TU-4461 | REV | 4111648 | 4112523 | 875 MU-2975          | 4112520 fpr                           | fpr  | 4111749 | 25  |
| TU-4462 | REV | 4112623 | 4113598 | 975 MU-2976          | 4113626 glpX                          | glpX | 4112592 | 24  |
| TU-4463 | REV | 4113998 | 4115748 | 1750 MU-2977         | glpK;glpF                             | glpF | 4115268 |     |
| TU-4464 | REV | 4116898 | 4117398 | 500 MU-2978          | 4117379 rraA                          | rraA | 4116868 | 26  |
| TU-4465 | REV | 4117448 | 4118398 | 950 MU-2979          | 4118424 menA                          | menA | 4117446 | 52  |
| TU-4466 | REV | 4117448 | 4118398 | 950 MU-2979          | 4118430 menA                          | menA | 4117446 | 58  |
| TU-4467 | REV | 4118448 | 4120323 | 1875 MU-2980         | 4120333 hslU;hslV                     | hslV | 4119780 | 23  |
| TU-4468 | REV | 4118448 | 4120323 | 1875 MU-2980         | 4120371 hslU;hslV                     | hslV | 4119780 | 61  |
| TU-4469 | REV | 4120373 | 4121123 | 750 MU-2981          | ftsN                                  | ftsN | 4120403 |     |
| TU-4470 | REV | 4121148 | 4122523 | 1375 MU-2982         | 4122533 cytR                          | cytR | 4121454 | 54  |
| TU-4471 | REV | 4122673 | 4124898 | 2225 MU-2983         | 4124857 priA                          | priA | 4122635 | 24  |
| TU-4472 | REV | 4125298 | 4126548 | 1250 MU-2984         | 4126446 yiiX;metJ                     | metJ | 4126101 | 28  |
| TU-4473 | REV | 4125298 | 4126548 | 1250 MU-2984         | 4126488 yiiX;metJ                     | metJ | 4126101 | 70  |
| TU-4474 | REV | 4125298 | 4126548 | 1250 MU-2984         | 4126552 yiiX;metJ                     | metJ | 4126101 | 134 |
| TU-4475 | REV | 4131373 | 4131773 | 400 MU-2985          | 4131790 NT                            |      |         |     |
| TU-4476 | REV | 4135063 | 4135680 | 617 MU-2986          | yijF                                  | yijF | 4135063 |     |
| TU-4477 | REV | 4136123 | 4140223 | 4100 MU-2987         | gldA;fsaB;ptsA                        | ptsA | 4137743 |     |
| TU-4478 | REV | 4145673 | 4146323 | 650 MU-2988          | 4146619 yijO                          | yijO | 4145489 | 279 |
| TU-4479 | REV | 4145673 | 4148323 | 2650 MU-2988;MU-2989 | 4148374 yijO;yijP                     | yijP | 4146555 | 86  |
| TU-4480 | REV | 4148473 | 4151273 | 2800 MU-2990         | 4151210 ppc                           | ppc  | 4148470 | 89  |
| TU-4481 | REV | 4151373 | 4153198 | 1825 MU-2991         | 4152919 argE                          | argE | 4151719 | 49  |
| TU-4482 | REV | 4151373 | 4153198 | 1825 MU-2991         | 4153098 argE                          | argE | 4151719 | 228 |
| TU-4483 | REV | 4156348 | 4156398 | 50 MU-2992           | 4156365 oxyS                          | oxyS | 4156308 | -52 |
| TU-4484 | REV | 4157273 | 4158810 | 1537 MU-2993         | 4158845 sthA                          | sthA | 4157413 | 32  |
| TU-4485 | REV | 4159885 | 4161285 | 1400 MU-2994         | 4161318 trmA                          | trmA | 4160193 | 25  |
| TU-4486 | REV | 4164310 | 4164560 | 250 MU-2995          | NT                                    |      |         |     |
| TU-4487 | REV | 4172110 | 4173110 | 1000 MU-2996         | 4173130 coaA                          | coaA | 4172099 | 81  |
| TU-4488 | REV | 4188399 | 4188599 | 200 MU-2997          | 4188551 sroH                          | sroH | 4188350 | 41  |
| TU-4489 | REV | 4188649 | 4194324 | 5675 MU-2998         | 4194323 thiH;thiG;thiS;thiF;thiE;thiC | thiC | 4192227 | 201 |
| TU-4490 | REV | 4188649 | 4194324 | 5675 MU-2998         | 4194398 thiH;thiG;thiS;thiF;thiE;thiC | thiC | 4192227 | 276 |

|         |     |         |         |                       |         |                                                                       |       |         |     |
|---------|-----|---------|---------|-----------------------|---------|-----------------------------------------------------------------------|-------|---------|-----|
| TU-4491 | REV | 4194349 | 4194949 | 600 MU-2999           | 4194882 | rsd                                                                   | rsd   | 4194355 | 51  |
| TU-4492 | REV | 4194349 | 4194949 | 600 MU-2999           | 4194977 | rsd                                                                   | rsd   | 4194355 | 146 |
| TU-4493 | REV | 4199249 | 4199699 | 450 MU-3000           | 4199735 | zraP                                                                  | zraP  | 4199286 | 24  |
| TU-4494 | REV | 4202624 | 4205574 | 2950 MU-3001          | 4205593 | purD;purH                                                             | purH  | 4203966 | 38  |
| TU-4495 | REV | 4211302 | 4212102 | 800 MU-3002           | 4212165 | yjaB                                                                  | yjaB  | 4211703 | 19  |
| TU-4496 | REV | 4218324 | 4220510 | 2186 MU-3003          |         | arpA                                                                  | arpA  | 4218324 |     |
| TU-4497 | REV | 4220832 | 4221657 | 825 MU-3004           | 4221675 | iclR                                                                  | iclR  | 4220827 | 24  |
| TU-4498 | REV | 4227707 | 4228157 | 450 MU-3005           | 4228191 | pepE                                                                  | pepE  | 4227476 | 26  |
| TU-4499 | REV | 4229258 | 4229708 | 450 MU-3006           | 4229722 | pagB                                                                  | pagB  | 4229382 | 68  |
| TU-4500 | REV | 4229733 | 4231533 | 1800 MU-3007          | 4231560 | lysC                                                                  | lysC  | 4229907 | 304 |
| TU-4501 | REV | 4237783 | 4238158 | 375 MU-3008           | 4238277 | yjbT                                                                  | yjbT  | 4237800 | 199 |
| TU-4502 | REV | 4238802 | 4240277 | 1475 MU-3009          |         | xylE                                                                  | xylE  | 4238802 |     |
| TU-4503 | REV | 4240958 | 4244459 | 3501 MU-3010          | 4244488 | malG;malF;malE                                                        | malE  | 4243252 | 46  |
| TU-4504 | REV | 4252059 | 4254642 | 2583 MU-3011          | 4254658 | plsB                                                                  | plsB  | 4252066 | 169 |
| TU-4505 | REV | 4257492 | 4258042 | 550 MU-3012           | 4258054 | zur                                                                   | zur   | 4257511 | 28  |
| TU-4506 | REV | 4261292 | 4262292 | 1000 MU-3013          | 4262317 | qor                                                                   | qor   | 4261271 | 63  |
| TU-4507 | REV | 4261292 | 4262292 | 1000 MU-3013          | 4262327 | qor                                                                   | qor   | 4261271 | 73  |
| TU-4508 | REV | 4266832 | 4267035 | 203 MU-3014           |         | yjbS                                                                  | yjbS  | 4266832 |     |
| TU-4509 | REV | 4269167 | 4271942 | 2775 MU-3015          | 4271914 | uvrA                                                                  | uvrA  | 4269072 | 20  |
| TU-4510 | REV | 4272817 | 4273167 | 350 MU-3016           | 4273158 | yjcB                                                                  | yjcB  | 4272783 | 94  |
| TU-4511 | REV | 4275067 | 4275417 | 350 MU-3017           | 4275432 | soxS                                                                  | soxS  | 4275083 | 26  |
| TU-4512 | REV | 4275067 | 4275417 | 350 MU-3017           | 4275446 | soxS                                                                  | soxS  | 4275083 | 40  |
| TU-4513 | REV | 4275942 | 4276092 | 150 MU-3018           | 4276089 | ryjA                                                                  | ryjA  | 4275950 | 0   |
| TU-4514 | REV | 4279806 | 4281098 | 1292 MU-3019          |         | yjcF                                                                  | yjcF  | 4279806 |     |
| TU-4515 | REV | 4281292 | 4285393 | 4101 MU-3020          | 4285413 | actP;yjcH;acs                                                         | acs   | 4283436 | 19  |
| TU-4516 | REV | 4293868 | 4295143 | 1275 MU-3021          | 4295172 | yjcO                                                                  | yjcO  | 4294459 | 24  |
| TU-4517 | REV | 4295368 | 4297493 | 2125 MU-3022          | 4297441 | fdhF                                                                  | fdhF  | 4295242 | 52  |
| TU-4518 | REV | 4297587 | 4302426 | 4839 MU-3023          |         | mdtP;mdtO;mdtN;yticA                                                  | yticA | 4302151 |     |
| TU-4519 | REV | 4302635 | 4304620 | 1985 MU-3024          |         | yjcS                                                                  | yjcS  | 4302635 |     |
| TU-4520 | REV | 4304893 | 4309003 | 4110 MU-3025          |         | alsK;alsE;alsC;alsA                                                   | alsA  | 4307471 |     |
| TU-4521 | REV | 4310194 | 4311019 | 825 MU-3026           | 4311039 | alsB;rpiR                                                             | rpiR  | 4310124 | 25  |
| TU-4522 | REV | 4312369 | 4313694 | 1325 MU-3027          | 4313646 | phnP;phnO                                                             | phnO  | 4313127 | 85  |
| TU-4523 | REV | 4312369 | 4323188 | 10819 MU-3027;MU-3028 |         | phnP;phnO;phnN;phnM;phnL;phnK;phnJ;phnI;phnH;phnG;phnF;phnE;phnD;phnC | phnC  | 4322400 |     |
| TU-4524 | REV | 4323319 | 4323769 | 450 MU-3029           | 4323744 | yjdN                                                                  | yjdN  | 4323321 | -20 |
| TU-4525 | REV | 4323319 | 4323769 | 450 MU-3029           | 4323789 | yjdN                                                                  | yjdN  | 4323321 | 25  |
| TU-4526 | REV | 4323844 | 4324819 | 975 MU-3030           | 4324818 | yjdM                                                                  | yjdM  | 4324422 | 61  |
| TU-4527 | REV | 4330294 | 4332269 | 1975 MU-3031          | 4332070 | basS;basR                                                             | basR  | 4331305 | 97  |
| TU-4528 | REV | 4331970 | 4333613 | 1643 MU-3032          |         | eptA                                                                  | eptA  | 4331970 |     |
| TU-4529 | REV | 4333717 | 4335952 | 2235 MU-3033          |         | adiC;adiY                                                             | adiY  | 4335191 |     |
| TU-4530 | REV | 4336277 | 4338547 | 2270 MU-3034          |         | adiA                                                                  | adiA  | 4336277 |     |
| TU-4531 | REV | 4338769 | 4339644 | 875 MU-3035           | 4339673 | melR                                                                  | melR  | 4338743 | 22  |
| TU-4532 | REV | 4342994 | 4347069 | 4075 MU-3036          | 4347112 | yjdF;fumB;dcuB                                                        | dcuB  | 4345427 | 345 |
| TU-4533 | REV | 4347298 | 4348573 | 1275 MU-3037          | 4348570 | dcuR                                                                  | dcuR  | 4347338 | 513 |
| TU-4534 | REV | 4347298 | 4349723 | 2425 MU-3037;MU-3038  | 4349711 | dcuR;dcuS                                                             | dcuS  | 4348054 | 26  |
| TU-4535 | REV | 4351248 | 4352848 | 1600 MU-3039          | 4352820 | lysU                                                                  | lysU  | 4351223 | 80  |

|         |     |         |         |              |                             |      |         |      |
|---------|-----|---------|---------|--------------|-----------------------------|------|---------|------|
| TU-4536 | REV | 4352973 | 4353898 | 925 MU-3040  | 4353810 yjdL                | yjdL | 4352977 | -624 |
| TU-4537 | REV | 4354493 | 4358054 | 3561 MU-3041 | cadA;cadB                   | cadB | 4356720 |      |
| TU-4538 | REV | 4358419 | 4359957 | 1538 MU-3042 | 4359983 cadC                | cadC | 4358419 | 26   |
| TU-4539 | REV | 4360214 | 4360376 | 162 MU-3043  | yjdQ                        | yjdQ | 4360214 |      |
| TU-4540 | REV | 4360574 | 4360649 | 75 MU-3044   | pheU                        | pheU | 4360574 |      |
| TU-4541 | REV | 4360674 | 4361249 | 575 MU-3045  | 4361353 yjdC                | yjdC | 4360756 | 22   |
| TU-4542 | REV | 4361274 | 4363574 | 2300 MU-3046 | 4363567 dipZ;cutA           | cutA | 4363041 | 188  |
| TU-4543 | REV | 4363624 | 4364849 | 1225 MU-3047 | 4364954 dcuA                | dcuA | 4363495 | 158  |
| TU-4544 | REV | 4364899 | 4366424 | 1525 MU-3048 | 4366481 aspA                | aspA | 4364914 | 131  |
| TU-4545 | REV | 4364899 | 4366424 | 1525 MU-3048 | 4366576 aspA                | aspA | 4364914 | 226  |
| TU-4546 | REV | 4367249 | 4368449 | 1200 MU-3049 | 4368478 yjeH                | yjeH | 4367179 | 43   |
| TU-4547 | REV | 4371388 | 4372257 | 869 MU-3050  | 4372334 yjeJ                | yjeJ | 4371388 | 77   |
| TU-4548 | REV | 4372649 | 4373774 | 1125 MU-3051 | 4373707 yjeK                | yjeK | 4372652 | 27   |
| TU-4549 | REV | 4372649 | 4373774 | 1125 MU-3051 | 4373723 yjeK                | yjeK | 4372652 | 43   |
| TU-4550 | REV | 4375024 | 4375749 | 725 MU-3052  | 4375769 blc                 | blc  | 4375212 | 24   |
| TU-4551 | REV | 4375999 | 4376974 | 975 MU-3053  | 4377026 ampC                | ampC | 4375834 | 59   |
| TU-4552 | REV | 4377074 | 4380424 | 3350 MU-3054 | 4380421 frdD;frdC;frdB;frdA | frdA | 4378533 | 80   |
| TU-4553 | REV | 4377074 | 4380424 | 3350 MU-3054 | 4380437 frdD;frdC;frdB;frdA | frdA | 4378533 | 96   |
| TU-4554 | REV | 4383999 | 4388449 | 4450 MU-3055 | 4388446 yjeP;psd            | psd  | 4387415 | 63   |
| TU-4555 | REV | 4388474 | 4389575 | 1101 MU-3056 | 4389612 rsgA                | rsgA | 4388480 | 80   |
| TU-4556 | REV | 4391077 | 4392077 | 1000 MU-3057 | 4392071 yjeS                | yjeS | 4390951 | -19  |
| TU-4557 | REV | 4413870 | 4414895 | 1025 MU-3058 | 4414787 yjfN;yjfO           | yjfO | 4414464 | -6   |
| TU-4558 | REV | 4415695 | 4416470 | 775 MU-3059  | 4416493 ulaR                | ulaR | 4415721 | 17   |
| TU-4559 | REV | 4415695 | 4416470 | 775 MU-3059  | 4416505 ulaR                | ulaR | 4415721 | 29   |
| TU-4560 | REV | 4416745 | 4417595 | 850 MU-3060  | 4417675 ulaG                | ulaG | 4416584 | 27   |
| TU-4561 | REV | 4416745 | 4417595 | 850 MU-3060  | 4417700 ulaG                | ulaG | 4416584 | 52   |
| TU-4562 | REV | 4422495 | 4422845 | 350 MU-3061  | 4422866 yjfY                | yjfY | 4422539 | 52   |
| TU-4563 | REV | 4424651 | 4425445 | 794 MU-3062  | 4425738 yjfZ                | yjfZ | 4424651 | 293  |
| TU-4564 | REV | 4426070 | 4426820 | 750 MU-3063  | 4426842 ytfB                | ytfB | 4426102 | 102  |
| TU-4565 | REV | 4427395 | 4427695 | 300 MU-3064  | 4427737 NT                  |      |         |      |
| TU-4566 | REV | 4427395 | 4427695 | 300 MU-3064  | 4427775 NT                  |      |         |      |
| TU-4567 | REV | 4429445 | 4429995 | 550 MU-3065  | 4430032 ytfE                | ytfE | 4429344 | 26   |
| TU-4568 | REV | 4430114 | 4431088 | 974 MU-3066  | 4431075 ytfF                | ytfF | 4430114 | -13  |
| TU-4569 | REV | 4430114 | 4431088 | 974 MU-3066  | 4431141 ytfF                | ytfF | 4430114 | 53   |
| TU-4570 | REV | 4430114 | 4431088 | 974 MU-3066  | 4431182 ytfF                | ytfF | 4430114 | 94   |
| TU-4571 | REV | 4431245 | 4432045 | 800 MU-3067  | 4432075 ytfG                | ytfG | 4431187 | 28   |
| TU-4572 | REV | 4432720 | 4434620 | 1900 MU-3068 | 4434652 cpdB                | cpdB | 4432645 | 64   |
| TU-4573 | REV | 4436795 | 4437345 | 550 MU-3069  | 4437333 ytfJ                | ytfJ | 4436731 | 48   |
| TU-4574 | REV | 4437896 | 4439397 | 1501 MU-3070 | 4439273 ytfL                | ytfL | 4437895 | 35   |
| TU-4575 | REV | 4437896 | 4439397 | 1501 MU-3070 | 4439407 ytfL                | ytfL | 4437895 | 169  |
| TU-4576 | REV | 4439472 | 4440272 | 800 MU-3071  | 4440285 msrA                | msrA | 4439561 | 86   |
| TU-4577 | REV | 4447147 | 4447697 | 550 MU-3072  | 4447709 ppa                 | ppa  | 4447145 | 34   |
| TU-4578 | REV | 4452647 | 4453772 | 1125 MU-3073 | 4453663 fbp                 | fbp  | 4452634 | 31   |
| TU-4579 | REV | 4452647 | 4453772 | 1125 MU-3073 | 4453669 fbp                 | fbp  | 4452634 | 37   |
| TU-4580 | REV | 4455147 | 4455947 | 800 MU-3074  | 4455910 yjgA                | yjgA | 4455337 | 22   |
| TU-4581 | REV | 4458072 | 4460831 | 2759 MU-3075 | 4460853 nrdG;nrdD           | nrdD | 4458545 | 170  |

|         |     |         |         |              |                             |      |         |      |
|---------|-----|---------|---------|--------------|-----------------------------|------|---------|------|
| TU-4582 | REV | 4462881 | 4465331 | 2450 MU-3076 | 4465297 treC;treB;treR      | treR | 4464322 | 28   |
| TU-4583 | REV | 4462881 | 4465331 | 2450 MU-3076 | 4465303 treC;treB;treR      | treR | 4464322 | 34   |
| TU-4584 | REV | 4468460 | 4468935 | 475 MU-3077  | 4468967 yjgF                | yjgF | 4468550 | 31   |
| TU-4585 | REV | 4468960 | 4470710 | 1750 MU-3078 | 4470574 pyrI;pyrB;pyrL      | pyrL | 4470422 | 18   |
| TU-4586 | REV | 4470760 | 4471260 | 500 MU-3079  | 4471189 yjgH                | yjgH | 4470837 | -43  |
| TU-4587 | REV | 4471410 | 4472060 | 650 MU-3080  | 4472082 yjgI                | yjgI | 4471363 | 6    |
| TU-4588 | REV | 4475235 | 4476335 | 1100 MU-3081 | 4476367 argI                | argI | 4475330 | 33   |
| TU-4589 | REV | 4477085 | 4477560 | 475 MU-3082  | 4477592 yjgM                | yjgM | 4477057 | 32   |
| TU-4590 | REV | 4479013 | 4481938 | 2925 MU-3083 | 4481941 valS                | valS | 4479005 | 81   |
| TU-4591 | REV | 4479013 | 4481938 | 2925 MU-3083 | 4481950 valS                | valS | 4479005 | 90   |
| TU-4592 | REV | 4481963 | 4482338 | 375 MU-3084  | 4482296 holC                | holC | 4481860 | -7   |
| TU-4593 | REV | 4482363 | 4484138 | 1775 MU-3085 | 4484124 pepA                | pepA | 4482463 | 150  |
| TU-4594 | REV | 4482363 | 4484138 | 1775 MU-3085 | 4484133 pepA                | pepA | 4482463 | 159  |
| TU-4595 | REV | 4482363 | 4484138 | 1775 MU-3085 | 4484159 pepA                | pepA | 4482463 | 185  |
| TU-4596 | REV | 4486488 | 4488088 | 1600 MU-3086 | 4488106 yjgR                | yjgR | 4486584 | 20   |
| TU-4597 | REV | 4488138 | 4489613 | 1475 MU-3087 | 4489571 idnR                | idnR | 4488164 | 409  |
| TU-4598 | REV | 4488138 | 4489613 | 1475 MU-3087 | 4489668 idnR                | idnR | 4488164 | 506  |
| TU-4599 | REV | 4489229 | 4492429 | 3200 MU-3088 | idnT;idnO;idnD              | idnD | 4491398 |      |
| TU-4600 | REV | 4493338 | 4494238 | 900 MU-3089  | 4494256 yjgB                | yjgB | 4493213 | 24   |
| TU-4601 | REV | 4497288 | 4497538 | 250 MU-3090  | 4497552 NT                  |      |         |      |
| TU-4602 | REV | 4498063 | 4498513 | 450 MU-3091  | 4498527 NT                  |      |         |      |
| TU-4603 | REV | 4497616 | 4498814 | 1198 MU-3092 | yjgX                        | yjgX | 4497616 |      |
| TU-4604 | REV | 4500163 | 4501438 | 1275 MU-3093 | 4501480 insG                | insG | 4500126 | 26   |
| TU-4605 | REV | 4504713 | 4504888 | 175 MU-3094  | 4504927 yjhD                | yjhD | 4504649 | 48   |
| TU-4606 | REV | 4505488 | 4506688 | 1200 MU-3095 | 4506740 insI                | insI | 4505489 | 100  |
| TU-4607 | REV | 4506699 | 4506965 | 266 MU-3096  | insM                        | insM | 4506699 |      |
| TU-4608 | REV | 4508620 | 4512720 | 4100 MU-3097 | 4512624 fecE;fecD;fecC;fecB | fecB | 4511429 | 293  |
| TU-4609 | REV | 4512995 | 4516270 | 3275 MU-3098 | 4516274 fecA;fecR;fecI      | fecI | 4515737 | 16   |
| TU-4610 | REV | 4512995 | 4516270 | 3275 MU-3098 | 4516286 fecA;fecR;fecI      | fecI | 4515737 | 28   |
| TU-4611 | REV | 4516620 | 4518470 | 1850 MU-3099 | 4518437 yjhU                | yjhU | 4517361 | 90   |
| TU-4612 | REV | 4518694 | 4520043 | 1349 MU-3100 | yjhF                        | yjhF | 4518694 |      |
| TU-4613 | REV | 4520150 | 4522117 | 1967 MU-3101 | yjhG                        | yjhG | 4520150 |      |
| TU-4614 | REV | 4522128 | 4523826 | 1698 MU-3102 | yjhH;yjhI                   | yjhI | 4523038 |      |
| TU-4615 | REV | 4524420 | 4525870 | 1450 MU-3103 | 4526043 sgcR;sgcE;sgcA      | sgcA | 4525572 | 40   |
| TU-4616 | REV | 4525920 | 4529670 | 3750 MU-3104 | 4529709 sgcQ;sgcC;sgcB;sgcX | sgcX | 4528553 | 35   |
| TU-4617 | REV | 4529945 | 4530345 | 400 MU-3105  | 4530385 yjhY                | yjhY | 4530073 | 52   |
| TU-4618 | REV | 4530445 | 4531920 | 1475 MU-3106 | 4531869 yjhP;yjhQ;yjhX      | yjhX | 4531819 | -207 |
| TU-4619 | REV | 4532453 | 4532698 | 245 MU-3107  | yjhZ                        | yjhZ | 4532453 |      |
| TU-4620 | REV | 4534637 | 4535617 | 980 MU-3108  | yjhS                        | yjhS | 4534637 |      |
| TU-4621 | REV | 4535645 | 4536895 | 1250 MU-3109 | 4536784 nanM                | nanM | 4535682 | -4   |
| TU-4622 | REV | 4536808 | 4537524 | 716 MU-3110  | nanC                        | nanC | 4536808 |      |
| TU-4623 | REV | 4547846 | 4549271 | 1425 MU-3111 | 4549357 gntP                | gntP | 4547976 | 38   |
| TU-4624 | REV | 4553513 | 4554343 | 830 MU-3112  | yjiC                        | yjiC | 4553513 |      |
| TU-4625 | REV | 4555571 | 4556371 | 800 MU-3113  | 4556259 yjiE                | yjiE | 4555401 | -53  |
| TU-4626 | REV | 4555571 | 4556371 | 800 MU-3113  | 4556338 yjiE                | yjiE | 4555401 | 26   |
| TU-4627 | REV | 4556396 | 4557646 | 1250 MU-3114 | 4557566 iadA                | iadA | 4556377 | 17   |

|         |     |         |         |              |                                  |      |         |     |
|---------|-----|---------|---------|--------------|----------------------------------|------|---------|-----|
| TU-4628 | REV | 4556396 | 4557646 | 1250 MU-3114 | 4557613 iadA                     | iadA | 4556377 | 64  |
| TU-4629 | REV | 4558121 | 4558872 | 751 MU-3115  | 4558769 yjiG;yjiH                | yjiH | 4558020 | 66  |
| TU-4630 | REV | 4559772 | 4565198 | 5426 MU-3116 | 4565269 yjiJ;yjiK;yjiL;yjiM;yjiN | yjiN | 4563989 | 0   |
| TU-4631 | REV | 4565323 | 4566756 | 1433 MU-3117 | 4566662 mdtM                     | mdtM | 4565310 | 120 |
| TU-4632 | REV | 4565323 | 4566756 | 1433 MU-3117 | 4566790 mdtM                     | mdtM | 4565310 | 248 |
| TU-4633 | REV | 4568306 | 4569631 | 1325 MU-3118 | 4569656 yjiR                     | yjiR | 4568185 | 59  |
| TU-4634 | REV | 4576044 | 4577344 | 1300 MU-3119 | 4577384 mcrC;mcrB                | mcrB | 4575981 | 24  |
| TU-4635 | REV | 4577570 | 4577845 | 275 MU-3120  | 4577938 symE                     | symE | 4577522 | 75  |
| TU-4636 | REV | 4578170 | 4581221 | 3051 MU-3121 | 4581252 hsdS;hsdM                | hsdM | 4579482 | 181 |
| TU-4637 | REV | 4578170 | 4581221 | 3051 MU-3121 | 4581296 hsdS;hsdM                | hsdM | 4579482 | 225 |
| TU-4638 | REV | 4578170 | 4581221 | 3051 MU-3121 | 4581329 hsdS;hsdM                | hsdM | 4579482 | 258 |
| TU-4639 | REV | 4581271 | 4584849 | 3578 MU-3122 | 4584833 hsdR                     | hsdR | 4581272 | -5  |
| TU-4640 | REV | 4585949 | 4587049 | 1100 MU-3123 | 4587083 yjiA;yjiX                | yjiX | 4586899 | -19 |
| TU-4641 | REV | 4587224 | 4589374 | 2150 MU-3124 | 4589376 yjiY                     | yjiY | 4587152 | 74  |
| TU-4642 | REV | 4591384 | 4592745 | 1361 MU-3125 | yjjL                             | yjjL | 4591384 |     |
| TU-4643 | REV | 4593224 | 4593899 | 675 MU-3126  | 4593888 yjjM                     | yjjM | 4592960 | 14  |
| TU-4644 | REV | 4595174 | 4597499 | 2325 MU-3127 | 4597516 mdoB                     | mdoB | 4595173 | 52  |
| TU-4645 | REV | 4597724 | 4599599 | 1875 MU-3128 | 4599580 yjjA;dnaC;dnaT           | dnaT | 4599001 | 40  |
| TU-4646 | REV | 4597724 | 4599599 | 1875 MU-3128 | 4599620 yjjA;dnaC;dnaT           | dnaT | 4599001 | 80  |
| TU-4647 | REV | 4600324 | 4600899 | 575 MU-3129  | 4600916 yjjB;yjjP                | yjjP | 4600111 | 35  |
| TU-4648 | REV | 4602599 | 4603699 | 1100 MU-3130 | 4603716 fhuF                     | fhuF | 4602898 | 30  |
| TU-4649 | REV | 4604049 | 4604424 | 375 MU-3131  | 4604459 leuV;leuP;leuQ           | leuQ | 4604338 | 35  |
| TU-4650 | REV | 4604624 | 4605724 | 1100 MU-3132 | 4605745 rsmC                     | rsmC | 4604692 | 22  |
| TU-4651 | REV | 4614049 | 4615099 | 1050 MU-3133 | 4615116 yjjW;yjjI                | yjjI | 4613538 | 28  |
| TU-4652 | REV | 4621274 | 4622799 | 1525 MU-3134 | 4622833 lplA;ytjB                | ytjB | 4622168 | 21  |
| TU-4653 | REV | 4626824 | 4628549 | 1725 MU-3135 | 4628586 yjjK                     | yjjK | 4626878 | 41  |
| TU-4654 | REV | 4631099 | 4631774 | 675 MU-3136  | 4631787 yjjX                     | yjjX | 4631256 | 19  |
| TU-4655 | REV | 4631099 | 4631774 | 675 MU-3136  | 4631795 yjjX                     | yjjX | 4631256 | 27  |
| TU-4656 | REV | 4632374 | 4633349 | 975 MU-3137  | 4633376 rob                      | rob  | 4632464 | 43  |
| TU-4657 | REV | 4637618 | 4638693 | 1075 MU-3138 | 4638355 arcA                     | arcA | 4637613 | 26  |
| TU-4658 | REV | 4637618 | 4638693 | 1075 MU-3138 | 4638361 arcA                     | arcA | 4637613 | 32  |
| TU-4659 | REV | 4637618 | 4638693 | 1075 MU-3138 | 4638442 arcA                     | arcA | 4637613 | 113 |
| TU-4660 | REV | 4637618 | 4638693 | 1075 MU-3138 | 4638618 arcA                     | arcA | 4637613 | 289 |
| TU-4661 | REV | 4637618 | 4638693 | 1075 MU-3138 | 4638703 arcA                     | arcA | 4637613 | 374 |
